# Supplementary material for: Assessment of the histone mark-based epigenomic landscape in human myometrium at term pregnancy
Source: eLife. 2025 Jun 10;13:RP95897. doi: 10.7554/eLife.95897 (PMC12151536; doi:10.7554/eLife.95897)
Supplement: Supplementary file 3. [file elife-95897-supp3.xlsx]

## Sheet: Dataset_SL
13114 peaks					ac.me1_common_peaks				PreGageSNPs	gage.pre_SNPs			HOMER Peak Annotation
	UnionOfCommonPeakNo	Chr	Start1	End1	UnionOfCommonPeakID	1011	1013	1015	Count_gageSNPs	rs#_gageSNPs	Count_preSNPs	rs#_preSNPs	PeakID..cmd.annotatePeaks.pl.peaks_union.bed.hg38.	Chr.1	Start	End	Strand	Peak.Score	Focus.Ratio.Region.Size	Annotation	Detailed.Annotation	Distance.to.TSS	Nearest.PromoterID	Entrez.ID	Nearest.Unigene	Nearest.Refseq	Nearest.Ensembl	Gene.Name	Gene.Alias	Gene.Description	Gene.Type
1	UPN1	chr1	940514	941865	chr1:940514-941865	1	1	1	0		0		1	chr1	940514	941865	+	0		exon (NM_152486, exon 8 of 14)	exon (NM_152486, exon 8 of 14)	15448	NM_152486	148398	Hs.335293	NM_152486	ENSG00000187634	SAMD11	MRS	sterile alpha motif domain containing 11	protein-coding
2	UPN2	chr1	942265	943185	chr1:942265-943185	1	1	1	0		0		2	chr1	942265	943185	+	0		exon (NM_152486, exon 11 of 14)	exon (NM_152486, exon 11 of 14)	16574	NM_015658	26155	Hs.405987	NM_015658	ENSG00000188976	NOC2L	NET15|NET7|NIR|PPP1R112	NOC2 like nucleolar associated transcriptional repressor	protein-coding
7	UPN7	chr1	966100	967100	chr1:966100-967100	1	1	1	0		0		7	chr1	966100	967100	+	0		TTS (NM_198317)	TTS (NM_198317)	103	NM_001160184	84069	Hs.528691	NM_032129	ENSG00000187583	PLEKHN1	CLPABP	pleckstrin homology domain containing N1	protein-coding
8	UPN8	chr1	998051	1002202	chr1:998051-1002202	1	1	1	0		0		8	chr1	998051	1002202	+	0		promoter-TSS (NM_001142467)	promoter-TSS (NM_001142467)	46	NM_021170	57801	Hs.154029	NM_021170	ENSG00000188290	HES4	bHLHb42	hes family bHLH transcription factor 4	protein-coding
9	UPN9	chr1	1013195	1015610	chr1:1013195-1015610	1	1	1	0		0		9	chr1	1013195	1015610	+	0		exon (NM_005101, exon 2 of 2)	exon (NM_005101, exon 2 of 2)	935	NM_005101	9636	Hs.458485	NM_005101	ENSG00000187608	ISG15	G1P2|IFI15|IMD38|IP17|UCRP|hUCRP	ISG15 ubiquitin-like modifier	protein-coding
14	UPN14	chr1	1157604	1159103	chr1:1157604-1159103	1	1	1	0		0		14	chr1	1157604	1159103	+	0		Intergenic	Intergenic	-8751	NR_029639	406984		NR_029639	ENSG00000207730	MIR200B	MIRN200B|mir-200b	microRNA 200b	ncRNA
22	UPN22	chr1	1211551	1213767	chr1:1211551-1213767	1	1	1	0		0		22	chr1	1211551	1213767	+	0		exon (NM_003327, exon 4 of 7)	exon (NM_003327, exon 4 of 7)	1509	NM_003327	7293	Hs.129780	NM_003327	ENSG00000186827	TNFRSF4	ACT35|CD134|IMD16|OX40|TXGP1L	TNF receptor superfamily member 4	protein-coding
28	UPN28	chr1	1303930	1307668	chr1:1303930-1307668	1	1	1	0		0		28	chr1	1303930	1307668	+	0		promoter-TSS (NR_145806)	promoter-TSS (NR_145806)	-987	NR_145806	109623456		NR_145806		SNORD167	-	small nucleolar RNA, C/D box 167	snoRNA
33	UPN33	chr1	1322847	1323722	chr1:1322847-1323722	1	1	1	0		0		33	chr1	1322847	1323722	+	0		exon (NM_001256462, exon 2 of 15)	exon (NM_001256462, exon 2 of 15)	1403	NM_001256462	54973	Hs.6449	NM_017871	ENSG00000127054	INTS11	CPSF3L|CPSF73L|INT11|RC-68|RC68	integrator complex subunit 11	protein-coding
34	UPN34	chr1	1324214	1326284	chr1:1324214-1326284	1	1	1	0		0		34	chr1	1324214	1326284	+	0		promoter-TSS (NM_001256462)	promoter-TSS (NM_001256462)	486	NM_001029885	80772	Hs.515689	NM_001029885	ENSG00000224051	CPTP	GLTPD1	ceramide-1-phosphate transfer protein	protein-coding
35	UPN35	chr1	1347290	1349023	chr1:1347290-1349023	1	1	1	0		0		35	chr1	1347290	1349023	+	0		intron (NM_001330311, intron 1 of 14)	intron (NM_001330311, intron 1 of 14)	956	NM_004421	1855	Hs.731450	NM_004421	ENSG00000107404	DVL1	DRS2|DVL|DVL1L1|DVL1P1	dishevelled segment polarity protein 1	protein-coding
41	UPN41	chr1	1358030	1362212	chr1:1358030-1362212	2	1	1	0		0		41	chr1	1358030	1362212	+	0		intron (NM_001282582, intron 1 of 10)	intron (NM_001282582, intron 1 of 10)	-1327	NM_001282584	54587	Hs.515687	NM_032348	ENSG00000162576	MXRA8	ASP3	matrix remodeling associated 8	protein-coding
43	UPN43	chr1	1375956	1376416	chr1:1375956-1376416	1	1	1	0		0		43	chr1	1375956	1376416	+	0		promoter-TSS (NM_001127229)	promoter-TSS (NM_001127229)	-748	NM_017900	54998	Hs.632515	NM_017900	ENSG00000175756	AURKAIP1	AIP|AKIP|MRP-S38	aurora kinase A interacting protein 1	protein-coding
47	UPN47	chr1	1427798	1428646	chr1:1427798-1428646	1	1	1	0		0		47	chr1	1427798	1428646	+	0		TTS (NM_001146685)	TTS (NM_001146685)	2094	NM_001146685	643965	Hs.729765	NM_001146685	ENSG00000205116	TMEM88B	-	transmembrane protein 88B	protein-coding
48	UPN48	chr1	1429343	1435634	chr1:1429343-1435634	1	1	2	0		0		48	chr1	1429343	1435634	+	0		intron (NR_125994, intron 1 of 1)	intron (NR_125994, intron 1 of 1)	2085	NR_125995	102724312		NR_125994		LINC01770	-	long intergenic non-protein coding RNA 1770	ncRNA
55	UPN55	chr1	1575044	1575824	chr1:1575044-1575824	1	1	1	0		0		55	chr1	1575044	1575824	+	0		promoter-TSS (NM_014188)	promoter-TSS (NM_014188)	-552	NM_014188	29101	Hs.30026	NM_014188	ENSG00000160075	SSU72	HSPC182|PNAS-120	SSU72 homolog, RNA polymerase II CTD phosphatase	protein-coding
60	UPN60	chr1	1630395	1632542	chr1:1630395-1632542	1	1	1	0		0		60	chr1	1630395	1632542	+	0		promoter-TSS (NM_006983)	promoter-TSS (NM_006983)	-713	NM_006983	8510	Hs.192316	NM_006983	ENSG00000189409	MMP23B	MIFR|MIFR-1|MMP22|MMP23A	matrix metallopeptidase 23B	protein-coding
68	UPN68	chr1	1778586	1783704	chr1:1778586-1783704	1	1	1	0		0		68	chr1	1778586	1783704	+	0		promoter-TSS (NM_001353641)	promoter-TSS (NM_001353641)	-998	NM_001353641	65220	Hs.654792	NM_023018	ENSG00000008130	NADK	dJ283E3.1	NAD kinase	protein-coding
70	UPN70	chr1	1857288	1859898	chr1:1857288-1859898	1	1	1	0		0		70	chr1	1857288	1859898	+	0		intron (NM_002074, intron 1 of 11)	intron (NM_002074, intron 1 of 11)	32524	NM_002074	2782	Hs.430425	NM_002074	ENSG00000078369	GNB1	MRD42	G protein subunit beta 1	protein-coding
76	UPN76	chr1	2050573	2051294	chr1:2050573-2051294	1	1	1	0		0		76	chr1	2050573	2051294	+	0		promoter-TSS (NR_135509)	promoter-TSS (NR_135509)	463	NM_002744	5590	Hs.496255	NM_002744	ENSG00000067606	PRKCZ	PKC-ZETA|PKC2	protein kinase C zeta	protein-coding
78	UPN78	chr1	2132338	2133280	chr1:2132338-2133280	1	1	1	0		0		78	chr1	2132338	2133280	+	0		intron (NM_001033582, intron 1 of 14)	intron (NM_001033582, intron 1 of 14)	28093	NM_001033582	5590	Hs.496255	NM_002744	ENSG00000067606	PRKCZ	PKC-ZETA|PKC2	protein kinase C zeta	protein-coding
79	UPN79	chr1	2133601	2135843	chr1:2133601-2135843	1	2	1	0		0		79	chr1	2133601	2135843	+	0		intron (NM_001033582, intron 1 of 14)	intron (NM_001033582, intron 1 of 14)	30006	NM_001033582	5590	Hs.496255	NM_002744	ENSG00000067606	PRKCZ	PKC-ZETA|PKC2	protein kinase C zeta	protein-coding
81	UPN81	chr1	2148465	2149852	chr1:2148465-2149852	1	1	1	0		0		81	chr1	2148465	2149852	+	0		intron (NM_001033581, intron 5 of 14)	intron (NM_001033581, intron 5 of 14)	34717	NR_146290	100506504	Hs.742283	NR_146290	ENSG00000182873	PRKCZ-AS1	-	PRKCZ antisense RNA 1	ncRNA
83	UPN83	chr1	2189177	2194285	chr1:2189177-2194285	1	1	3	0		0		83	chr1	2189177	2194285	+	0		TTS (NM_001256946)	TTS (NM_001256946)	3044	NM_001282671	199990	Hs.107101	NM_182533	ENSG00000162585	FAAP20	C1orf86|FP7162	Fanconi anemia core complex associated protein 20	protein-coding
85	UPN85	chr1	2196776	2199826	chr1:2196776-2199826	1	1	2	0		0		85	chr1	2196776	2199826	+	0		intron (NM_001146310, intron 5 of 7)	intron (NM_001146310, intron 5 of 7)	-3526	NM_182533	199990	Hs.107101	NM_182533	ENSG00000162585	FAAP20	C1orf86|FP7162	Fanconi anemia core complex associated protein 20	protein-coding
87	UPN87	chr1	2202875	2204827	chr1:2202875-2204827	1	1	1	0		0		87	chr1	2202875	2204827	+	0		intron (NM_001282670, intron 2 of 7)	MIRb|SINE|MIR	3882	NM_001146310	199990	Hs.107101	NM_182533	ENSG00000162585	FAAP20	C1orf86|FP7162	Fanconi anemia core complex associated protein 20	protein-coding
88	UPN88	chr1	2205339	2211159	chr1:2205339-2211159	2	1	2	0		0		88	chr1	2205339	2211159	+	0		promoter-TSS (NM_001146310)	promoter-TSS (NM_001146310)	-516	NM_001146310	199990	Hs.107101	NM_182533	ENSG00000162585	FAAP20	C1orf86|FP7162	Fanconi anemia core complex associated protein 20	protein-coding
89	UPN89	chr1	2212054	2216916	chr1:2212054-2216916	2	1	1	0		0		89	chr1	2212054	2216916	+	0		Intergenic	Intergenic	-1765	NM_001282670	199990	Hs.107101	NM_182533	ENSG00000162585	FAAP20	C1orf86|FP7162	Fanconi anemia core complex associated protein 20	protein-coding
90	UPN90	chr1	2226214	2227589	chr1:2226214-2227589	1	1	1	0		0		90	chr1	2226214	2227589	+	0		Intergenic	CpG	-1794	NM_003036	6497	Hs.656507	NM_003036	ENSG00000157933	SKI	SGS|SKV	SKI proto-oncogene	protein-coding
91	UPN91	chr1	2229067	2236340	chr1:2229067-2236340	1	1	1	0		0		91	chr1	2229067	2236340	+	0		intron (NM_003036, intron 1 of 6)	intron (NM_003036, intron 1 of 6)	4008	NM_003036	6497	Hs.656507	NM_003036	ENSG00000157933	SKI	SGS|SKV	SKI proto-oncogene	protein-coding
92	UPN92	chr1	2236816	2238700	chr1:2236816-2238700	2	1	1	0		0		92	chr1	2236816	2238700	+	0		intron (NM_003036, intron 1 of 6)	intron (NM_003036, intron 1 of 6)	9063	NM_003036	6497	Hs.656507	NM_003036	ENSG00000157933	SKI	SGS|SKV	SKI proto-oncogene	protein-coding
94	UPN94	chr1	2246218	2246864	chr1:2246218-2246864	1	1	1	0		0		94	chr1	2246218	2246864	+	0		intron (NM_003036, intron 1 of 6)	intron (NM_003036, intron 1 of 6)	17846	NM_003036	6497	Hs.656507	NM_003036	ENSG00000157933	SKI	SGS|SKV	SKI proto-oncogene	protein-coding
96	UPN96	chr1	2254866	2257015	chr1:2254866-2257015	1	1	1	0		0		96	chr1	2254866	2257015	+	0		intron (NM_003036, intron 1 of 6)	intron (NM_003036, intron 1 of 6)	27245	NM_003036	6497	Hs.656507	NM_003036	ENSG00000157933	SKI	SGS|SKV	SKI proto-oncogene	protein-coding
101	UPN101	chr1	2277707	2280154	chr1:2277707-2280154	1	1	2	0		0		101	chr1	2277707	2280154	+	0		intron (NM_003036, intron 1 of 6)	intron (NM_003036, intron 1 of 6)	50235	NM_003036	6497	Hs.656507	NM_003036	ENSG00000157933	SKI	SGS|SKV	SKI proto-oncogene	protein-coding
102	UPN102	chr1	2288692	2294646	chr1:2288692-2294646	3	1	1	0		0		102	chr1	2288692	2294646	+	0		intron (NM_003036, intron 1 of 6)	intron (NM_003036, intron 1 of 6)	60992	NR_024489	100129534	Hs.655313	NM_001127577	ENSG00000269896	LOC100129534	-	small nuclear ribonucleoprotein polypeptide N pseudogene	pseudo
104	UPN104	chr1	2298473	2303597	chr1:2298473-2303597	1	1	1	0		0		104	chr1	2298473	2303597	+	0		intron (NM_003036, intron 1 of 6)	CpG	51626	NR_024489	100129534	Hs.655313	NM_001127577	ENSG00000269896	LOC100129534	-	small nuclear ribonucleoprotein polypeptide N pseudogene	pseudo
106	UPN106	chr1	2310311	2324170	chr1:2310311-2324170	4	2	3	0		0		106	chr1	2310311	2324170	+	0		Intergenic	Intergenic	35421	NR_024489	100129534	Hs.655313	NM_001127577	ENSG00000269896	LOC100129534	-	small nuclear ribonucleoprotein polypeptide N pseudogene	pseudo
107	UPN107	chr1	2330259	2331686	chr1:2330259-2331686	1	1	1	0		0		107	chr1	2330259	2331686	+	0		intron (NM_024848, intron 12 of 13)	intron (NM_024848, intron 12 of 13)	21689	NR_024489	100129534	Hs.655313	NM_001127577	ENSG00000269896	LOC100129534	-	small nuclear ribonucleoprotein polypeptide N pseudogene	pseudo
110	UPN110	chr1	2411687	2412387	chr1:2411687-2412387	1	1	1	0		0		110	chr1	2411687	2412387	+	0		intron (NM_153818, intron 1 of 5)	CpG	534	NM_153818	5192	Hs.732228	NM_002617	ENSG00000157911	PEX10	NALD|PBD6A|PBD6B|RNF69	peroxisomal biogenesis factor 10	protein-coding
111	UPN111	chr1	2412868	2414510	chr1:2412868-2414510	1	1	1	0		0		111	chr1	2412868	2414510	+	0		Intergenic	Intergenic	-1118	NM_002617	5192	Hs.732228	NM_002617	ENSG00000157911	PEX10	NALD|PBD6A|PBD6B|RNF69	peroxisomal biogenesis factor 10	protein-coding
118	UPN118	chr1	2545262	2550023	chr1:2545262-2550023	1	1	1	0		0		118	chr1	2545262	2550023	+	0		Intergenic	Intergenic	-8723	NM_003820	8764	Hs.512898	NM_003820	ENSG00000157873	TNFRSF14	ATAR|CD270|HVEA|HVEM|LIGHTR|TR2	TNF receptor superfamily member 14	protein-coding
119	UPN119	chr1	2553962	2558678	chr1:2553962-2558678	1	1	1	0		0		119	chr1	2553962	2558678	+	0		promoter-TSS (NM_001297605).2	promoter-TSS (NM_001297605).2	-45	NM_003820	8764	Hs.512898	NM_003820	ENSG00000157873	TNFRSF14	ATAR|CD270|HVEA|HVEM|LIGHTR|TR2	TNF receptor superfamily member 14	protein-coding
120	UPN120	chr1	2575515	2576701	chr1:2575515-2576701	1	1	1	0		0		120	chr1	2575515	2576701	+	0		intron (NR_121638, intron 1 of 3)	intron (NR_121638, intron 1 of 3)	9573	NR_121638	100996583	Hs.444114	NR_121638	ENSG00000228037	LOC100996583	-	uncharacterized LOC100996583	ncRNA
121	UPN121	chr1	2577477	2579131	chr1:2577477-2579131	1	1	1	0		0		121	chr1	2577477	2579131	+	0		intron (NR_121638, intron 1 of 3)	intron (NR_121638, intron 1 of 3)	-8156	NR_036637	127281	Hs.462033	NM_152371	ENSG00000157870	FAM213B	C1orf93	family with sequence similarity 213 member B	protein-coding
124	UPN124	chr1	2641489	2643513	chr1:2641489-2643513	1	1	1	0		0		124	chr1	2641489	2643513	+	0		intron (NM_001242672, intron 6 of 6).2	intron (NM_001242672, intron 6 of 6).2	-9459	NM_033467	79258	Hs.591453	NM_033467	ENSG00000142606	MMEL1	MMEL2|NEP2|NEPII|NL1|NL2|SEP	membrane metalloendopeptidase like 1	protein-coding
131	UPN131	chr1	3312197	3314656	chr1:3312197-3314656	1	1	1	0		0		131	chr1	3312197	3314656	+	0		intron (NM_199454, intron 3 of 16)	intron (NM_199454, intron 3 of 16)	-141157	NM_014448	27237	Hs.87435	NM_014448	ENSG00000130762	ARHGEF16	GEF16|NBR	Rho guanine nucleotide exchange factor 16	protein-coding
134	UPN134	chr1	3530134	3531261	chr1:3530134-3531261	1	1	1	0		0		134	chr1	3530134	3531261	+	0		intron (NM_001409, intron 4 of 36)	intron (NM_001409, intron 4 of 36)	30093	NR_030277	693135		NR_030277	ENSG00000207776	MIR551A	MIRN551A|mir-551a	microRNA 551a	ncRNA
135	UPN135	chr1	3538273	3542370	chr1:3538273-3542370	2	1	1	0		0		135	chr1	3538273	3542370	+	0		intron (NM_001409, intron 4 of 36)	intron (NM_001409, intron 4 of 36)	20469	NR_030277	693135		NR_030277	ENSG00000207776	MIR551A	MIRN551A|mir-551a	microRNA 551a	ncRNA
138	UPN138	chr1	3625431	3625945	chr1:3625431-3625945	1	1	1	0		0		138	chr1	3625431	3625945	+	0		intron (NM_182752, intron 2 of 4)	intron (NM_182752, intron 2 of 4)	696	NM_182752	127262	Hs.20529	NM_182752	ENSG00000158109	TPRG1L	FAM79A|h-mover|mover	tumor protein p63 regulated 1 like	protein-coding
139	UPN139	chr1	3649514	3650041	chr1:3649514-3650041	1	1	1	0		0		139	chr1	3649514	3650041	+	0		intron (NM_017818, intron 1 of 11)	intron (NM_017818, intron 1 of 11)	330	NM_017818	49856	Hs.31714	NM_017818	ENSG00000116213	WRAP73	WDR8	WD repeat containing, antisense to TP73	protein-coding
140	UPN140	chr1	3676663	3678006	chr1:3676663-3678006	1	1	1	0		0		140	chr1	3676663	3678006	+	0		intron (NM_001204188, intron 1 of 11)	intron (NM_001204188, intron 1 of 11)	-13338	NM_001204190	7161	Hs.192132	NM_005427	ENSG00000078900	TP73	P73	tumor protein p73	protein-coding
143	UPN143	chr1	3795395	3796489	chr1:3795395-3796489	1	1	1	0		0		143	chr1	3795395	3796489	+	0		exon (NM_020710, exon 1 of 7)	exon (NM_020710, exon 1 of 7)	562	NM_020710	57470	Hs.268488	NM_020710	ENSG00000130764	LRRC47	-	leucine rich repeat containing 47	protein-coding
146	UPN146	chr1	3899354	3900243	chr1:3899354-3900243	1	1	1	0		0		146	chr1	3899354	3900243	+	0		promoter-TSS (NR_024455)	promoter-TSS (NR_024455)	495	NM_207356	339448	Hs.103939	NM_207356	ENSG00000198912	C1orf174	-	chromosome 1 open reading frame 174	protein-coding
149	UPN149	chr1	5992140	5995177	chr1:5992140-5995177	1	1	1	0		0		149	chr1	5992140	5995177	+	0		intron (NM_001199861, intron 1 of 15)	intron (NM_001199861, intron 1 of 15)	-1185	NR_111987	261734	Hs.462348	NM_015102	ENSG00000131697	NPHP4	POC10|SLSN4	nephrocystin 4	protein-coding
150	UPN150	chr1	6025510	6029078	chr1:6025510-6029078	1	2	2	0		0		150	chr1	6025510	6029078	+	0		intron (NM_172130, intron 1 of 14)	intron (NM_172130, intron 1 of 14)	1281	NM_003636	8514	Hs.440497	NM_003636	ENSG00000069424	KCNAB2	AKR6A5|HKvbeta2|HKvbeta2.1|HKvbeta2.2|KCNA2B|KV-BETA-2	potassium voltage-gated channel subfamily A regulatory beta subunit 2	protein-coding
154	UPN154	chr1	6205848	6206690	chr1:6205848-6206690	1	1	1	0		0		154	chr1	6205848	6206690	+	0		promoter-TSS (NR_125997)	promoter-TSS (NR_125997)	140	NM_207396	388591	Hs.716549	NM_173795	ENSG00000158286	RNF207	C1orf188	ring finger protein 207	protein-coding
159	UPN159	chr1	6358317	6360847	chr1:6358317-6360847	1	1	1	0		0		159	chr1	6358317	6360847	+	0		promoter-TSS (NM_181866)	promoter-TSS (NM_181866)	-638	NM_181866	11332	Hs.126137	NM_007274	ENSG00000097021	ACOT7	ACH1|ACT|BACH|CTE-II|LACH|LACH1|hBACH	acyl-CoA thioesterase 7	protein-coding
160	UPN160	chr1	6393769	6394437	chr1:6393769-6394437	1	1	1	0		0		160	chr1	6393769	6394437	+	0		promoter-TSS (NM_007274)	promoter-TSS (NM_007274)	-337	NM_007274	11332	Hs.126137	NM_007274	ENSG00000097021	ACOT7	ACH1|ACT|BACH|CTE-II|LACH|LACH1|hBACH	acyl-CoA thioesterase 7	protein-coding
169	UPN169	chr1	6553835	6554365	chr1:6553835-6554365	1	1	1	0		0		169	chr1	6553835	6554365	+	0		intron (NM_024654, intron 1 of 11)	CpG	498	NM_024654	79707	Hs.59425	NM_024654	ENSG00000162408	NOL9	Grc3|NET6	nucleolar protein 9	protein-coding
170	UPN170	chr1	6578739	6581366	chr1:6578739-6581366	1	1	1	0		0		170	chr1	6578739	6581366	+	0		promoter-TSS (NM_005341)	promoter-TSS (NM_005341)	61	NM_001278647	3104	Hs.502330	NM_005341	ENSG00000204859	ZBTB48	HKR3|TZAP|ZNF855|pp9964	zinc finger and BTB domain containing 48	protein-coding
171	UPN171	chr1	6581655	6582625	chr1:6581655-6582625	1	1	1	0		0		171	chr1	6581655	6582625	+	0		exon (NM_005341, exon 3 of 11)	exon (NM_005341, exon 3 of 11)	2149	NM_001278647	3104	Hs.502330	NM_005341	ENSG00000204859	ZBTB48	HKR3|TZAP|ZNF855|pp9964	zinc finger and BTB domain containing 48	protein-coding
172	UPN172	chr1	6598900	6601616	chr1:6598900-6601616	1	1	2	0		0		172	chr1	6598900	6601616	+	0		intron (NM_001324309, intron 1 of 3)	AluJb|SINE|Alu	2640	NM_001324309	9903	Hs.7764	NM_014851	ENSG00000162413	KLHL21	-	kelch like family member 21	protein-coding
173	UPN173	chr1	6603146	6605282	chr1:6603146-6605282	1	1	1	0		0		173	chr1	6603146	6605282	+	0		Intergenic	Intergenic	-1316	NM_014851	9903	Hs.7764	NM_014851	ENSG00000162413	KLHL21	-	kelch like family member 21	protein-coding
174	UPN174	chr1	6612456	6613070	chr1:6612456-6613070	1	1	1	0		0		174	chr1	6612456	6613070	+	0		promoter-TSS (NM_153812)	promoter-TSS (NM_153812)	-933	NM_153812	148479	Hs.516079	NM_153812	ENSG00000116273	PHF13	PHF5|SPOC1	PHD finger protein 13	protein-coding
179	UPN179	chr1	6743246	6743939	chr1:6743246-6743939	1	1	1	0		0		179	chr1	6743246	6743939	+	0		Intergenic	Intergenic	16065	NR_104621	100505887	Hs.250839	NR_104620		LINC01672	-	long intergenic non-protein coding RNA 1672	ncRNA
180	UPN180	chr1	6786107	6786591	chr1:6786107-6786591	1	1	1	0		0		180	chr1	6786107	6786591	+	0		intron (NM_001349612, intron 1 of 22)	intron (NM_001349612, intron 1 of 22)	1025	NM_001349610	23261	Hs.397705	NM_015215	ENSG00000171735	CAMTA1	CANPMR	calmodulin binding transcription activator 1	protein-coding
183	UPN183	chr1	7299596	7300065	chr1:7299596-7300065	1	1	1	0		0		183	chr1	7299596	7300065	+	0		intron (NM_001349612, intron 4 of 22)	intron (NM_001349612, intron 4 of 22)	89924	NR_146199	102725193	Hs.666120	NR_146199	ENSG00000237728	LOC102725193	-	uncharacterized LOC102725193	ncRNA
184	UPN184	chr1	7388530	7389456	chr1:7388530-7389456	1	1	1	0		0		184	chr1	7388530	7389456	+	0		intron (NR_146200, intron 2 of 2)	intron (NR_146200, intron 2 of 2)	761	NR_146199	102725193	Hs.666120	NR_146199	ENSG00000237728	LOC102725193	-	uncharacterized LOC102725193	ncRNA
186	UPN186	chr1	7469823	7472670	chr1:7469823-7472670	2	3	1	0		0		186	chr1	7469823	7472670	+	0		intron (NM_001349612, intron 5 of 22)	intron (NM_001349612, intron 5 of 22)	-81492	NR_146201	102725193	Hs.666120	NR_146199	ENSG00000237728	LOC102725193	-	uncharacterized LOC102725193	ncRNA
187	UPN187	chr1	7491081	7491412	chr1:7491081-7491412	1	1	1	0		0		187	chr1	7491081	7491412	+	0		intron (NM_001349612, intron 5 of 22)	intron (NM_001349612, intron 5 of 22)	-101492	NR_146201	102725193	Hs.666120	NR_146199	ENSG00000237728	LOC102725193	-	uncharacterized LOC102725193	ncRNA
196	UPN196	chr1	7942090	7943398	chr1:7942090-7943398	1	1	1	0		0		196	chr1	7942090	7943398	+	0		intron (NM_001561, intron 1 of 8)	intron (NM_001561, intron 1 of 8)	421	NM_001561	3604	Hs.86447	NM_001561	ENSG00000049249	TNFRSF9	4-1BB|CD137|CDw137|ILA	TNF receptor superfamily member 9	protein-coding
197	UPN197	chr1	7953615	7954570	chr1:7953615-7954570	1	1	1	0		0		197	chr1	7953615	7954570	+	0		Intergenic	CpG	-7562	NM_007262	11315	Hs.419640	NM_007262	ENSG00000116288	PARK7	DJ-1|DJ1|GATD2|HEL-S-67p	Parkinsonism associated deglycase	protein-coding
202	UPN202	chr1	8026264	8027835	chr1:8026264-8027835	1	1	1	0		0		202	chr1	8026264	8027835	+	0		promoter-TSS (NM_018948)	promoter-TSS (NM_018948)	-716	NM_018948	54206	Hs.605445	NM_018948	ENSG00000116285	ERRFI1	GENE-33|MIG-6|MIG6|RALT	ERBB receptor feedback inhibitor 1	protein-coding
214	UPN214	chr1	8115515	8118821	chr1:8115515-8118821	2	1	2	0		0		214	chr1	8115515	8118821	+	0		Intergenic	Intergenic	-90835	NM_018948	54206	Hs.605445	NM_018948	ENSG00000116285	ERRFI1	GENE-33|MIG-6|MIG6|RALT	ERBB receptor feedback inhibitor 1	protein-coding
215	UPN215	chr1	8119939	8122700	chr1:8119939-8122700	1	1	1	0		0		215	chr1	8119939	8122700	+	0		Intergenic	Intergenic	-87353	NR_125998	102724539	Hs.516816	NR_125998	ENSG00000227634	LINC01714	-	long intergenic non-protein coding RNA 1714	ncRNA
222	UPN222	chr1	8169180	8170682	chr1:8169180-8170682	1	1	1	0		0		222	chr1	8169180	8170682	+	0		Intergenic	Intergenic	-38741	NR_125998	102724539	Hs.516816	NR_125998	ENSG00000227634	LINC01714	-	long intergenic non-protein coding RNA 1714	ncRNA
224	UPN224	chr1	8200149	8205023	chr1:8200149-8205023	2	2	2	0		0		224	chr1	8200149	8205023	+	0		Intergenic	Intergenic	-6086	NR_125998	102724539	Hs.516816	NR_125998	ENSG00000227634	LINC01714	-	long intergenic non-protein coding RNA 1714	ncRNA
227	UPN227	chr1	8216865	8217935	chr1:8216865-8217935	1	1	1	0		0		227	chr1	8216865	8217935	+	0		Intergenic	CpG	8728	NR_125998	102724539	Hs.516816	NR_125998	ENSG00000227634	LINC01714	-	long intergenic non-protein coding RNA 1714	ncRNA
233	UPN233	chr1	8342937	8344365	chr1:8342937-8344365	1	1	1	0		0		233	chr1	8342937	8344365	+	0		intron (NM_001080397, intron 8 of 8)	CpG	25566	NM_001080397	50651	Hs.463036	NM_001080397	ENSG00000162426	SLC45A1	DNB5|IDDNPF	solute carrier family 45 member 1	protein-coding
236	UPN236	chr1	8370909	8375077	chr1:8370909-8375077	1	1	2	0		0		236	chr1	8370909	8375077	+	0		intron (NM_001042681, intron 12 of 22)	intron (NM_001042681, intron 12 of 22)	50694	NM_001042682	473	Hs.463041	NM_012102	ENSG00000142599	RERE	ARG|ARP|ATN1L|DNB1|NEDBEH	arginine-glutamic acid dipeptide repeats	protein-coding
239	UPN239	chr1	8378324	8380071	chr1:8378324-8380071	1	1	1	0		0		239	chr1	8378324	8380071	+	0		intron (NM_001042681, intron 12 of 22)	intron (NM_001042681, intron 12 of 22)	44490	NM_001042682	473	Hs.463041	NM_012102	ENSG00000142599	RERE	ARG|ARP|ATN1L|DNB1|NEDBEH	arginine-glutamic acid dipeptide repeats	protein-coding
243	UPN243	chr1	8395598	8398743	chr1:8395598-8398743	1	2	1	0		0		243	chr1	8395598	8398743	+	0		intron (NM_001042681, intron 12 of 22)	MIR|SINE|MIR	26517	NM_001042682	473	Hs.463041	NM_012102	ENSG00000142599	RERE	ARG|ARP|ATN1L|DNB1|NEDBEH	arginine-glutamic acid dipeptide repeats	protein-coding
244	UPN244	chr1	8406849	8409857	chr1:8406849-8409857	2	1	1	0		0		244	chr1	8406849	8409857	+	0		intron (NM_001042681, intron 12 of 22)	intron (NM_001042681, intron 12 of 22)	15334	NM_001042682	473	Hs.463041	NM_012102	ENSG00000142599	RERE	ARG|ARP|ATN1L|DNB1|NEDBEH	arginine-glutamic acid dipeptide repeats	protein-coding
245	UPN245	chr1	8411286	8413115	chr1:8411286-8413115	1	1	2	0		0		245	chr1	8411286	8413115	+	0		intron (NM_001042681, intron 12 of 22)	intron (NM_001042681, intron 12 of 22)	11487	NM_001042682	473	Hs.463041	NM_012102	ENSG00000142599	RERE	ARG|ARP|ATN1L|DNB1|NEDBEH	arginine-glutamic acid dipeptide repeats	protein-coding
248	UPN248	chr1	8424041	8426171	chr1:8424041-8426171	1	1	1	0		0		248	chr1	8424041	8426171	+	0		intron (NR_125999, intron 1 of 3)	intron (NR_125999, intron 1 of 3)	461	NR_125999	102724552	Hs.568612	NR_125999		LOC102724552	-	uncharacterized LOC102724552	ncRNA
256	UPN256	chr1	8463061	8464684	chr1:8463061-8464684	1	2	1	0		0		256	chr1	8463061	8464684	+	0		intron (NM_001042681, intron 11 of 22)	intron (NM_001042681, intron 11 of 22)	31041	NR_132752	106632271		NR_132752		SNORD128	ZL43	small nucleolar RNA, C/D box 128	snoRNA
260	UPN260	chr1	8524685	8525611	chr1:8524685-8525611	1	1	1	0		0		260	chr1	8524685	8525611	+	0		intron (NM_001042681, intron 7 of 22)	intron (NM_001042681, intron 7 of 22)	-30235	NR_132752	106632271		NR_132752		SNORD128	ZL43	small nucleolar RNA, C/D box 128	snoRNA
264	UPN264	chr1	8660479	8662416	chr1:8660479-8662416	2	1	1	0		0		264	chr1	8660479	8662416	+	0		intron (NM_001042681, intron 1 of 22)	L2a|LINE|L2	156193	NM_012102	473	Hs.463041	NM_012102	ENSG00000142599	RERE	ARG|ARP|ATN1L|DNB1|NEDBEH	arginine-glutamic acid dipeptide repeats	protein-coding
273	UPN273	chr1	8873507	8874383	chr1:8873507-8874383	1	1	1	0		0		273	chr1	8873507	8874383	+	0		intron (NM_001353346, intron 2 of 11)	intron (NM_001353346, intron 2 of 11)	4741	NM_001201483	2023	Hs.517145	NM_001428	ENSG00000074800	ENO1	ENO1L1|HEL-S-17|MPB1|NNE|PPH	enolase 1	protein-coding
275	UPN275	chr1	8878866	8880892	chr1:8878866-8880892	1	1	2	0		0		275	chr1	8878866	8880892	+	0		TTS (NR_038351)	TTS (NR_038351)	1044	NR_038351	100505975	Hs.429843	NR_038351	ENSG00000230679	ENO1-AS1	-	ENO1 antisense RNA 1	ncRNA
285	UPN285	chr1	9127781	9129016	chr1:9127781-9129016	1	1	1	0		0		285	chr1	9127781	9129016	+	0		intron (NM_024980, intron 1 of 3)	intron (NM_024980, intron 1 of 3)	772	NM_024980	80045	Hs.632367	NM_024980	ENSG00000180758	GPR157	-	G protein-coupled receptor 157	protein-coding
286	UPN286	chr1	9129479	9130019	chr1:9129479-9130019	1	1	1	0		0		286	chr1	9129479	9130019	+	0		promoter-TSS (NM_024980)	promoter-TSS (NM_024980)	-579	NM_024980	80045	Hs.632367	NM_024980	ENSG00000180758	GPR157	-	G protein-coupled receptor 157	protein-coding
287	UPN287	chr1	9161876	9165232	chr1:9161876-9165232	1	1	1	0		0		287	chr1	9161876	9165232	+	0		intron (NR_132742, intron 1 of 1)	intron (NR_132742, intron 1 of 1)	-11777	NR_029610	407040		NR_029610	ENSG00000284357	MIR34A	MIRN34A|miRNA34A|mir-34|mir-34a	microRNA 34a	ncRNA
289	UPN289	chr1	9178608	9179281	chr1:9178608-9179281	1	1	1	0		0		289	chr1	9178608	9179281	+	0		intron (NR_132742, intron 1 of 1)	intron (NR_132742, intron 1 of 1)	-3260	NR_132738	102724571	Hs.599298	NR_132738	ENSG00000234546	LINC01759	-	long intergenic non-protein coding RNA 1759	ncRNA
290	UPN290	chr1	9180393	9183430	chr1:9180393-9183430	1	2	2	0		0		290	chr1	9180393	9183430	+	0		promoter-TSS (NR_132738)	promoter-TSS (NR_132738)	-293	NR_132738	102724571	Hs.599298	NR_132738	ENSG00000234546	LINC01759	-	long intergenic non-protein coding RNA 1759	ncRNA
292	UPN292	chr1	9232919	9234629	chr1:9232919-9234629	1	1	1	0		0		292	chr1	9232919	9234629	+	0		Intergenic	AluJb|SINE|Alu	-1030	NM_004285	9563	Hs.463511	NM_004285	ENSG00000049239	H6PD	CORTRD1|G6PDH|GDH	hexose-6-phosphate dehydrogenase/glucose 1-dehydrogenase	protein-coding
294	UPN294	chr1	9237438	9243683	chr1:9237438-9243683	4	2	2	0		0		294	chr1	9237438	9243683	+	0		intron (NM_001282587, intron 1 of 4)	MIR3|SINE|MIR	716	NM_001282587	9563	Hs.463511	NM_004285	ENSG00000049239	H6PD	CORTRD1|G6PDH|GDH	hexose-6-phosphate dehydrogenase/glucose 1-dehydrogenase	protein-coding
295	UPN295	chr1	9243934	9244779	chr1:9243934-9244779	1	1	1	0		0		295	chr1	9243934	9244779	+	0		intron (NM_001282587, intron 1 of 4)	MIR|SINE|MIR	4512	NM_001282587	9563	Hs.463511	NM_004285	ENSG00000049239	H6PD	CORTRD1|G6PDH|GDH	hexose-6-phosphate dehydrogenase/glucose 1-dehydrogenase	protein-coding
303	UPN303	chr1	9301822	9304369	chr1:9301822-9304369	1	1	1	0		0		303	chr1	9301822	9304369	+	0		intron (NM_025106, intron 1 of 2)	ERVL-int|LTR|ERVL	10213	NM_025106	80176	Hs.8261	NM_025106	ENSG00000171621	SPSB1	SSB-1|SSB1	splA/ryanodine receptor domain and SOCS box containing 1	protein-coding
304	UPN304	chr1	9315145	9318823	chr1:9315145-9318823	2	3	2	0		0		304	chr1	9315145	9318823	+	0		intron (NM_025106, intron 1 of 2)	intron (NM_025106, intron 1 of 2)	24102	NM_025106	80176	Hs.8261	NM_025106	ENSG00000171621	SPSB1	SSB-1|SSB1	splA/ryanodine receptor domain and SOCS box containing 1	protein-coding
306	UPN306	chr1	9320415	9323740	chr1:9320415-9323740	2	2	1	0		0		306	chr1	9320415	9323740	+	0		intron (NM_025106, intron 1 of 2)	intron (NM_025106, intron 1 of 2)	29195	NM_025106	80176	Hs.8261	NM_025106	ENSG00000171621	SPSB1	SSB-1|SSB1	splA/ryanodine receptor domain and SOCS box containing 1	protein-coding
307	UPN307	chr1	9324175	9326947	chr1:9324175-9326947	1	1	2	0		0		307	chr1	9324175	9326947	+	0		intron (NM_025106, intron 1 of 2)	intron (NM_025106, intron 1 of 2)	32679	NM_025106	80176	Hs.8261	NM_025106	ENSG00000171621	SPSB1	SSB-1|SSB1	splA/ryanodine receptor domain and SOCS box containing 1	protein-coding
308	UPN308	chr1	9337392	9341486	chr1:9337392-9341486	1	1	2	0		0		308	chr1	9337392	9341486	+	0		intron (NM_025106, intron 1 of 2)	intron (NM_025106, intron 1 of 2)	46557	NM_025106	80176	Hs.8261	NM_025106	ENSG00000171621	SPSB1	SSB-1|SSB1	splA/ryanodine receptor domain and SOCS box containing 1	protein-coding
311	UPN311	chr1	9369707	9378679	chr1:9369707-9378679	2	1	2	0		0		311	chr1	9369707	9378679	+	0		Intergenic	Intergenic	54723	NR_104623	100506022	Hs.131775	NR_104622	ENSG00000284693	LOC100506022	-	uncharacterized LOC100506022	ncRNA
312	UPN312	chr1	9384026	9385230	chr1:9384026-9385230	1	2	1	0		0		312	chr1	9384026	9385230	+	0		Intergenic	Intergenic	44288	NR_104623	100506022	Hs.131775	NR_104622	ENSG00000284693	LOC100506022	-	uncharacterized LOC100506022	ncRNA
313	UPN313	chr1	9385625	9386094	chr1:9385625-9386094	1	1	1	0		0		313	chr1	9385625	9386094	+	0		Intergenic	Intergenic	43057	NR_104623	100506022	Hs.131775	NR_104622	ENSG00000284693	LOC100506022	-	uncharacterized LOC100506022	ncRNA
314	UPN314	chr1	9397618	9398701	chr1:9397618-9398701	2	1	1	0		0		314	chr1	9397618	9398701	+	0		Intergenic	Intergenic	30757	NR_104623	100506022	Hs.131775	NR_104622	ENSG00000284693	LOC100506022	-	uncharacterized LOC100506022	ncRNA
317	UPN317	chr1	9412495	9414124	chr1:9412495-9414124	1	1	1	0		0		317	chr1	9412495	9414124	+	0		Intergenic	Intergenic	15607	NR_104623	100506022	Hs.131775	NR_104622	ENSG00000284693	LOC100506022	-	uncharacterized LOC100506022	ncRNA
318	UPN318	chr1	9428422	9429639	chr1:9428422-9429639	1	1	2	0		0		318	chr1	9428422	9429639	+	0		promoter-TSS (NR_104623)	promoter-TSS (NR_104623)	-34	NR_104622	100506022	Hs.131775	NR_104622	ENSG00000284693	LOC100506022	-	uncharacterized LOC100506022	ncRNA
320	UPN320	chr1	9437346	9440067	chr1:9437346-9440067	2	1	1	0		0		320	chr1	9437346	9440067	+	0		Intergenic	Intergenic	-9710	NR_104622	100506022	Hs.131775	NR_104622	ENSG00000284693	LOC100506022	-	uncharacterized LOC100506022	ncRNA
321	UPN321	chr1	9440563	9442083	chr1:9440563-9442083	1	1	1	0		0		321	chr1	9440563	9442083	+	0		Intergenic	Intergenic	-12327	NR_104622	100506022	Hs.131775	NR_104622	ENSG00000284693	LOC100506022	-	uncharacterized LOC100506022	ncRNA
322	UPN322	chr1	9442474	9443239	chr1:9442474-9443239	1	1	1	0		0		322	chr1	9442474	9443239	+	0		Intergenic	Intergenic	-13860	NR_104622	100506022	Hs.131775	NR_104622	ENSG00000284693	LOC100506022	-	uncharacterized LOC100506022	ncRNA
325	UPN325	chr1	9448161	9449139	chr1:9448161-9449139	1	1	1	0		0		325	chr1	9448161	9449139	+	0		Intergenic	(GCAG)n|Simple_repeat|Simple_repeat	-19654	NR_104622	100506022	Hs.131775	NR_104622	ENSG00000284693	LOC100506022	-	uncharacterized LOC100506022	ncRNA
327	UPN327	chr1	9467244	9468613	chr1:9467244-9468613	1	1	1	0		0		327	chr1	9467244	9468613	+	0		Intergenic	Intergenic	-38932	NR_104622	100506022	Hs.131775	NR_104622	ENSG00000284693	LOC100506022	-	uncharacterized LOC100506022	ncRNA
329	UPN329	chr1	9473277	9473841	chr1:9473277-9473841	1	1	1	0		0		329	chr1	9473277	9473841	+	0		Intergenic	Intergenic	-44563	NR_104622	100506022	Hs.131775	NR_104622	ENSG00000284693	LOC100506022	-	uncharacterized LOC100506022	ncRNA
333	UPN333	chr1	9627227	9631332	chr1:9627227-9631332	1	2	2	0		0		333	chr1	9627227	9631332	+	0		Intergenic	Intergenic	-22452	NM_005026	5293	Hs.518451	NM_005026	ENSG00000171608	PIK3CD	APDS|IMD14|P110DELTA|PI3K|p110D	phosphatidylinositol-4,5-bisphosphate 3-kinase catalytic subunit delta	protein-coding
334	UPN334	chr1	9650892	9653227	chr1:9650892-9653227	1	1	1	0		0		334	chr1	9650892	9653227	+	0		TTS (NR_027045)	TTS (NR_027045)	328	NM_005026	5293	Hs.518451	NM_005026	ENSG00000171608	PIK3CD	APDS|IMD14|P110DELTA|PI3K|p110D	phosphatidylinositol-4,5-bisphosphate 3-kinase catalytic subunit delta	protein-coding
339	UPN339	chr1	9715252	9719334	chr1:9715252-9719334	1	2	2	0		0		339	chr1	9715252	9719334	+	0		intron (NM_001350234, intron 7 of 23)	intron (NM_001350234, intron 7 of 23)	25826	NM_001350235	5293	Hs.518451	NM_005026	ENSG00000171608	PIK3CD	APDS|IMD14|P110DELTA|PI3K|p110D	phosphatidylinositol-4,5-bisphosphate 3-kinase catalytic subunit delta	protein-coding
343	UPN343	chr1	9796711	9799409	chr1:9796711-9799409	2	1	2	0		0		343	chr1	9796711	9799409	+	0		intron (NM_001009566, intron 1 of 18)	AluSz|SINE|Alu	26466	NM_001302883	22883	Hs.29665	NM_014944	ENSG00000171603	CLSTN1	ALC-ALPHA|CDHR12|CST-1|CSTN1|PIK3CD|XB31alpha|alcalpha1|alcalpha2	calsyntenin 1	protein-coding
347	UPN347	chr1	9892760	9893493	chr1:9892760-9893493	1	1	1	0		0		347	chr1	9892760	9893493	+	0		intron (NM_020248, intron 1 of 5)	intron (NM_020248, intron 1 of 5)	17132	NM_001012329	56998	Hs.463759	NM_020248	ENSG00000178585	CTNNBIP1	ICAT	catenin beta interacting protein 1	protein-coding
349	UPN349	chr1	9909139	9909969	chr1:9909139-9909969	1	1	1	0		0		349	chr1	9909139	9909969	+	0		intron (NM_020248, intron 1 of 5)	intron (NM_020248, intron 1 of 5)	704	NM_001012329	56998	Hs.463759	NM_020248	ENSG00000178585	CTNNBIP1	ICAT	catenin beta interacting protein 1	protein-coding
362	UPN362	chr1	10251386	10254684	chr1:10251386-10254684	1	1	2	0		0		362	chr1	10251386	10254684	+	0		intron (NM_183416, intron 2 of 20)	intron (NM_183416, intron 2 of 20)	25317	NR_036176
363	UPN363	chr1	10378048	10378393	chr1:10378048-10378393	1	1	1	0		0		363	chr1	10378048	10378393	+	0		3' UTR (NM_015074, exon 47 of 47)	3' UTR (NM_015074, exon 47 of 47)	-20772	NM_002631	5226	Hs.464071	NM_002631	ENSG00000142657	PGD	6PGD	phosphogluconate dehydrogenase	protein-coding
366	UPN366	chr1	10399559	10401009	chr1:10399559-10401009	1	1	1	0		0		366	chr1	10399559	10401009	+	0		intron (NM_001304452, intron 2 of 12)	intron (NM_001304452, intron 2 of 12)	1166	NM_001304452	5226	Hs.464071	NM_002631	ENSG00000142657	PGD	6PGD	phosphogluconate dehydrogenase	protein-coding
369	UPN369	chr1	10494946	10495890	chr1:10494946-10495890	1	1	1	0		0		369	chr1	10494946	10495890	+	0		intron (NM_004565, intron 2 of 8)	intron (NM_004565, intron 2 of 8)	20472	NM_004565	5195	Hs.149983	NM_004565	ENSG00000142655	PEX14	NAPP2|PBD13A|Pex14p|dJ734G22.2	peroxisomal biogenesis factor 14	protein-coding
371	UPN371	chr1	10511449	10511972	chr1:10511449-10511972	1	1	1	0		0		371	chr1	10511449	10511972	+	0		intron (NM_004565, intron 2 of 8)	intron (NM_004565, intron 2 of 8)	36764	NM_004565	5195	Hs.149983	NM_004565	ENSG00000142655	PEX14	NAPP2|PBD13A|Pex14p|dJ734G22.2	peroxisomal biogenesis factor 14	protein-coding
373	UPN373	chr1	10527805	10528336	chr1:10527805-10528336	1	1	1	0		0		373	chr1	10527805	10528336	+	0		intron (NM_004565, intron 2 of 8)	intron (NM_004565, intron 2 of 8)	53124	NM_004565	5195	Hs.149983	NM_004565	ENSG00000142655	PEX14	NAPP2|PBD13A|Pex14p|dJ734G22.2	peroxisomal biogenesis factor 14	protein-coding
374	UPN374	chr1	10528600	10530892	chr1:10528600-10530892	1	1	1	0		0		374	chr1	10528600	10530892	+	0		intron (NM_004565, intron 2 of 8)	intron (NM_004565, intron 2 of 8)	54800	NM_004565	5195	Hs.149983	NM_004565	ENSG00000142655	PEX14	NAPP2|PBD13A|Pex14p|dJ734G22.2	peroxisomal biogenesis factor 14	protein-coding
379	UPN379	chr1	10628369	10636400	chr1:10628369-10636400	3	1	2	0		0		379	chr1	10628369	10636400	+	0		Intergenic	Intergenic	157438	NM_004565	5195	Hs.149983	NM_004565	ENSG00000142655	PEX14	NAPP2|PBD13A|Pex14p|dJ734G22.2	peroxisomal biogenesis factor 14	protein-coding
381	UPN381	chr1	10638026	10641857	chr1:10638026-10641857	2	1	1	0		0		381	chr1	10638026	10641857	+	0		exon (NM_001079843, exon 21 of 21)	exon (NM_001079843, exon 21 of 21)	156735	NM_001079843	54897	Hs.439894	NM_017766	ENSG00000130940	CASZ1	CAS11|CST|SRG|ZNF693|dJ734G22.1	castor zinc finger 1	protein-coding
403	UPN403	chr1	11058774	11059862	chr1:11058774-11059862	1	1	1	0		0		403	chr1	11058774	11059862	+	0		exon (NM_003132, exon 2 of 8)	exon (NM_003132, exon 2 of 8)	716	NM_003132	6723	Hs.76244	NM_003132	ENSG00000116649	SRM	PAPT|SPDSY|SPS1|SRML1	spermidine synthase	protein-coding
407	UPN407	chr1	11273322	11274082	chr1:11273322-11274082	1	1	1	0		0		407	chr1	11273322	11274082	+	0		exon (NM_013319, exon 1 of 2)	exon (NM_013319, exon 1 of 2)	504	NM_013319	29914	Hs.522933	NM_013319	ENSG00000120942	UBIAD1	SCCD|TERE1	UbiA prenyltransferase domain containing 1	protein-coding
412	UPN412	chr1	11719288	11719981	chr1:11719288-11719981	1	1	1	0		0		412	chr1	11719288	11719981	+	0		exon (NM_198545, exon 7 of 7)	exon (NM_198545, exon 7 of 7)	-16451	NM_001040194	57085	Hs.464438	NM_020350	ENSG00000177674	AGTRAP	ATRAP	angiotensin II receptor associated protein	protein-coding
415	UPN415	chr1	11728736	11733002	chr1:11728736-11733002	1	3	3	0		0		415	chr1	11728736	11733002	+	0		Intergenic	Intergenic	-5216	NM_001040194	57085	Hs.464438	NM_020350	ENSG00000177674	AGTRAP	ATRAP	angiotensin II receptor associated protein	protein-coding
417	UPN417	chr1	11735341	11739282	chr1:11735341-11739282	1	1	2	0		0		417	chr1	11735341	11739282	+	0		intron (NM_001040195, intron 1 of 3)	intron (NM_001040195, intron 1 of 3)	1226	NM_001040196	57085	Hs.464438	NM_020350	ENSG00000177674	AGTRAP	ATRAP	angiotensin II receptor associated protein	protein-coding
419	UPN419	chr1	11787227	11793043	chr1:11787227-11793043	1	1	2	0		0		419	chr1	11787227	11793043	+	0		TTS (NM_001010881)	TTS (NM_001010881)	-10516	NR_126000	102724659	Hs.737635	NR_126000	ENSG00000177553	LOC102724659	-	uncharacterized LOC102724659	ncRNA
422	UPN422	chr1	11802224	11805952	chr1:11802224-11805952	1	3	1	0		0		422	chr1	11802224	11805952	+	0		promoter-TSS (NM_001330358)	promoter-TSS (NM_001330358)	-411	NM_001330358	4524	Hs.214142	NM_005957	ENSG00000177000	MTHFR	-	methylenetetrahydrofolate reductase	protein-coding
428	UPN428	chr1	11933970	11935474	chr1:11933970-11935474	1	1	1	0		0		428	chr1	11933970	11935474	+	0		promoter-TSS (NM_001316320)	promoter-TSS (NM_001316320)	55	NM_001316320	5351	Hs.75093	NM_000302	ENSG00000083444	PLOD1	EDS6|EDSKCL1|LH|LH1|LLH|PLOD	procollagen-lysine,2-oxoglutarate 5-dioxygenase 1	protein-coding
438	UPN438	chr1	12068073	12068841	chr1:12068073-12068841	1	1	1	0		0		438	chr1	12068073	12068841	+	0		intron (NM_001281430, intron 1 of 13)	intron (NM_001281430, intron 1 of 13)	5080	NM_001243	943	Hs.1314	NM_001243	ENSG00000120949	TNFRSF8	CD30|D1S166E|Ki-1	TNF receptor superfamily member 8	protein-coding
439	UPN439	chr1	12125060	12127667	chr1:12125060-12127667	2	1	1	0		0		439	chr1	12125060	12127667	+	0		intron (NM_001243, intron 12 of 14)	intron (NM_001243, intron 12 of 14)	-40580	NR_107000	102465836		NR_107000	ENSG00000283789	MIR7846	hsa-mir-7846	microRNA 7846	ncRNA
442	UPN442	chr1	12140161	12154399	chr1:12140161-12154399	1	1	2	0		0		442	chr1	12140161	12154399	+	0		Intergenic	Intergenic	-19663	NR_107000	102465836		NR_107000	ENSG00000283789	MIR7846	hsa-mir-7846	microRNA 7846	ncRNA
444	UPN444	chr1	12157137	12159204	chr1:12157137-12159204	2	1	1	0		0		444	chr1	12157137	12159204	+	0		Intergenic	Intergenic	-8773	NR_107000	102465836		NR_107000	ENSG00000283789	MIR7846	hsa-mir-7846	microRNA 7846	ncRNA
445	UPN445	chr1	12160029	12163809	chr1:12160029-12163809	1	1	1	0		0		445	chr1	12160029	12163809	+	0		Intergenic	Intergenic	-5024	NR_107000	102465836		NR_107000	ENSG00000283789	MIR7846	hsa-mir-7846	microRNA 7846	ncRNA
446	UPN446	chr1	12164613	12166209	chr1:12164613-12166209	1	1	1	0		0		446	chr1	12164613	12166209	+	0		Intergenic	Intergenic	-1532	NR_107000	102465836		NR_107000	ENSG00000283789	MIR7846	hsa-mir-7846	microRNA 7846	ncRNA
447	UPN447	chr1	12166640	12170894	chr1:12166640-12170894	1	1	1	0		0		447	chr1	12166640	12170894	+	0		intron (NM_001066, intron 1 of 9)	L2c|LINE|L2	1764	NM_001066	7133	Hs.256278	NM_001066	ENSG00000028137	TNFRSF1B	CD120b|TBPII|TNF-R-II|TNF-R75|TNFBR|TNFR1B|TNFR2|TNFR80|p75|p75TNFR	TNF receptor superfamily member 1B	protein-coding
448	UPN448	chr1	12171295	12187081	chr1:12171295-12187081	2	3	2	0		0		448	chr1	12171295	12187081	+	0		intron (NM_001066, intron 1 of 9)	intron (NM_001066, intron 1 of 9)	12185	NM_001066	7133	Hs.256278	NM_001066	ENSG00000028137	TNFRSF1B	CD120b|TBPII|TNF-R-II|TNF-R75|TNFBR|TNFR1B|TNFR2|TNFR80|p75|p75TNFR	TNF receptor superfamily member 1B	protein-coding
453	UPN453	chr1	12230663	12231596	chr1:12230663-12231596	1	1	1	0		0		453	chr1	12230663	12231596	+	0		intron (NM_015378, intron 1 of 69)	CpG	1090	NM_018156	55187	Hs.439381	NM_015378	ENSG00000048707	VPS13D	-	vacuolar protein sorting 13 homolog D	protein-coding
457	UPN457	chr1	12344030	12346691	chr1:12344030-12346691	1	1	1	0		0		457	chr1	12344030	12346691	+	0		intron (NM_015378, intron 42 of 69)	intron (NM_015378, intron 42 of 69)	115321	NM_018156	55187	Hs.439381	NM_015378	ENSG00000048707	VPS13D	-	vacuolar protein sorting 13 homolog D	protein-coding
462	UPN462	chr1	12405031	12408866	chr1:12405031-12408866	1	1	1	0		0		462	chr1	12405031	12408866	+	0		intron (NM_015378, intron 63 of 69)	intron (NM_015378, intron 63 of 69)	-100298	NR_003022	677882	Hs.658450	NR_003022	ENSG00000266079	SNORA59B	ACA59	small nucleolar RNA, H/ACA box 59B	snoRNA
464	UPN464	chr1	12422922	12424116	chr1:12422922-12424116	1	1	1	0		0		464	chr1	12422922	12424116	+	0		intron (NM_015378, intron 65 of 69)	intron (NM_015378, intron 65 of 69)	-83727	NR_003022	677882	Hs.658450	NR_003022	ENSG00000266079	SNORA59B	ACA59	small nucleolar RNA, H/ACA box 59B	snoRNA
466	UPN466	chr1	12432475	12436657	chr1:12432475-12436657	1	2	1	0		0		466	chr1	12432475	12436657	+	0		intron (NM_015378, intron 65 of 69)	intron (NM_015378, intron 65 of 69)	-72680	NR_003022	677882	Hs.658450	NR_003022	ENSG00000266079	SNORA59B	ACA59	small nucleolar RNA, H/ACA box 59B	snoRNA
468	UPN468	chr1	12446861	12455493	chr1:12446861-12455493	2	3	3	0		0		468	chr1	12446861	12455493	+	0		intron (NM_015378, intron 65 of 69)	intron (NM_015378, intron 65 of 69)	-56069	NR_003022	677882	Hs.658450	NR_003022	ENSG00000266079	SNORA59B	ACA59	small nucleolar RNA, H/ACA box 59B	snoRNA
471	UPN471	chr1	12458196	12458886	chr1:12458196-12458886	1	1	1	0		0		471	chr1	12458196	12458886	+	0		intron (NM_015378, intron 66 of 69)	FRAM|SINE|Alu	-48705	NR_003022	677882	Hs.658450	NR_003022	ENSG00000266079	SNORA59B	ACA59	small nucleolar RNA, H/ACA box 59B	snoRNA
473	UPN473	chr1	12460749	12461795	chr1:12460749-12461795	1	1	1	0		0		473	chr1	12460749	12461795	+	0		intron (NM_015378, intron 67 of 69)	intron (NM_015378, intron 67 of 69)	-45974	NR_003022	677882	Hs.658450	NR_003022	ENSG00000266079	SNORA59B	ACA59	small nucleolar RNA, H/ACA box 59B	snoRNA
474	UPN474	chr1	12462002	12465213	chr1:12462002-12465213	2	2	2	0		0		474	chr1	12462002	12465213	+	0		intron (NM_015378, intron 67 of 69)	AluJb|SINE|Alu	-43639	NR_003022	677882	Hs.658450	NR_003022	ENSG00000266079	SNORA59B	ACA59	small nucleolar RNA, H/ACA box 59B	snoRNA
475	UPN475	chr1	12472080	12476811	chr1:12472080-12476811	1	3	1	0		0		475	chr1	12472080	12476811	+	0		intron (NM_015378, intron 67 of 69)	intron (NM_015378, intron 67 of 69)	-32801	NR_003022	677882	Hs.658450	NR_003022	ENSG00000266079	SNORA59B	ACA59	small nucleolar RNA, H/ACA box 59B	snoRNA
476	UPN476	chr1	12477146	12482204	chr1:12477146-12482204	1	3	1	0		0		476	chr1	12477146	12482204	+	0		intron (NM_015378, intron 67 of 69)	MIR|SINE|MIR	-27571	NR_003022	677882	Hs.658450	NR_003022	ENSG00000266079	SNORA59B	ACA59	small nucleolar RNA, H/ACA box 59B	snoRNA
480	UPN480	chr1	12495456	12497684	chr1:12495456-12497684	1	1	1	0		0		480	chr1	12495456	12497684	+	0		intron (NM_015378, intron 67 of 69)	intron (NM_015378, intron 67 of 69)	-10676	NR_003022	677882	Hs.658450	NR_003022	ENSG00000266079	SNORA59B	ACA59	small nucleolar RNA, H/ACA box 59B	snoRNA
481	UPN481	chr1	12510055	12512307	chr1:12510055-12512307	1	1	1	0		0		481	chr1	12510055	12512307	+	0		3' UTR (NM_018156, exon 69 of 69)	3' UTR (NM_018156, exon 69 of 69)	3935	NR_003025	677885	Hs.658450	NR_003025	ENSG00000239149	SNORA59A	ACA59	small nucleolar RNA, H/ACA box 59A	snoRNA
483	UPN483	chr1	12525526	12526047	chr1:12525526-12526047	1	1	1	0		0		483	chr1	12525526	12526047	+	0		Intergenic	Intergenic	18540	NR_003025	677885	Hs.658450	NR_003025	ENSG00000239149	SNORA59A	ACA59	small nucleolar RNA, H/ACA box 59A	snoRNA
485	UPN485	chr1	12540144	12542540	chr1:12540144-12542540	1	1	1	0		0		485	chr1	12540144	12542540	+	0		Intergenic	Intergenic	34096	NR_003025	677885	Hs.658450	NR_003025	ENSG00000239149	SNORA59A	ACA59	small nucleolar RNA, H/ACA box 59A	snoRNA
486	UPN486	chr1	12546489	12551091	chr1:12546489-12551091	1	2	2	0		0		486	chr1	12546489	12551091	+	0		Intergenic	Intergenic	30233	NR_106788	102466722		NR_106788	ENSG00000276830	MIR6730	hsa-mir-6730	microRNA 6730	ncRNA
490	UPN490	chr1	12556833	12557906	chr1:12556833-12557906	1	1	1	0		0		490	chr1	12556833	12557906	+	0		Intergenic	MER1A|DNA|hAT-Charlie	21654	NR_106788	102466722		NR_106788	ENSG00000276830	MIR6730	hsa-mir-6730	microRNA 6730	ncRNA
491	UPN491	chr1	12590665	12598702	chr1:12590665-12598702	3	3	1	0		0		491	chr1	12590665	12598702	+	0		intron (NM_004753, intron 1 of 5)	L2a|LINE|L2	1713	NM_001324370	9249	Hs.289347	NM_004753	ENSG00000162496	DHRS3	DD83.1|RDH17|Rsdr1|SDR1|SDR16C1|retSDR1	dehydrogenase/reductase 3	protein-coding
492	UPN492	chr1	12599071	12600880	chr1:12599071-12600880	2	2	1	0		0		492	chr1	12599071	12600880	+	0		intron (NM_004753, intron 1 of 5)	MIR|SINE|MIR	-3579	NM_001324370	9249	Hs.289347	NM_004753	ENSG00000162496	DHRS3	DD83.1|RDH17|Rsdr1|SDR1|SDR16C1|retSDR1	dehydrogenase/reductase 3	protein-coding
493	UPN493	chr1	12601247	12604426	chr1:12601247-12604426	1	1	1	0		0		493	chr1	12601247	12604426	+	0		intron (NM_004753, intron 1 of 5)	intron (NM_004753, intron 1 of 5)	-6440	NM_001324370	9249	Hs.289347	NM_004753	ENSG00000162496	DHRS3	DD83.1|RDH17|Rsdr1|SDR1|SDR16C1|retSDR1	dehydrogenase/reductase 3	protein-coding
503	UPN503	chr1	13592939	13594647	chr1:13592939-13594647	2	1	1	0		0		503	chr1	13592939	13594647	+	0		intron (NM_001006624, intron 1 of 5)	intron (NM_001006624, intron 1 of 5)	8321	NM_001006624	10630	Hs.468675	NM_006474	ENSG00000162493	PDPN	AGGRUS|GP36|GP40|Gp38|HT1A-1|OTS8|PA2.26|T1A|T1A-2|T1A2|TI1A	podoplanin	protein-coding
507	UPN507	chr1	13617262	13619589	chr1:13617262-13619589	1	1	1	0		0		507	chr1	13617262	13619589	+	0		TTS (NM_006474)	TTS (NM_006474)	32953	NM_001006624	10630	Hs.468675	NM_006474	ENSG00000162493	PDPN	AGGRUS|GP36|GP40|Gp38|HT1A-1|OTS8|PA2.26|T1A|T1A-2|T1A2|TI1A	podoplanin	protein-coding
509	UPN509	chr1	13699458	13699882	chr1:13699458-13699882	1	1	1	0		0		509	chr1	13699458	13699882	+	0		promoter-TSS (NM_001135610)	promoter-TSS (NM_001135610)	-570	NM_001135610	7799	Hs.371823	NM_012231	ENSG00000116731	PRDM2	HUMHOXY1|KMT8|KMT8A|MTB-ZF|RIZ|RIZ1|RIZ2	PR/SET domain 2	protein-coding
514	UPN514	chr1	13748442	13749057	chr1:13748442-13749057	1	1	1	0		0		514	chr1	13748442	13749057	+	0		promoter-TSS (NM_001007257)	promoter-TSS (NM_001007257)	-632	NM_001007257	7799	Hs.371823	NM_012231	ENSG00000116731	PRDM2	HUMHOXY1|KMT8|KMT8A|MTB-ZF|RIZ|RIZ1|RIZ2	PR/SET domain 2	protein-coding
524	UPN524	chr1	14943240	14947333	chr1:14943240-14947333	1	2	2	0		0		524	chr1	14943240	14947333	+	0		promoter-TSS (NM_001017999)	promoter-TSS (NM_001017999)	-633	NM_001017999	23254	Hs.368823	NM_015209	ENSG00000189337	KAZN	KAZ	kazrin, periplakin interacting protein	protein-coding
526	UPN526	chr1	14968322	14969494	chr1:14968322-14969494	1	1	1	0		2	rs10927603,rs880923	526	chr1	14968322	14969494	+	0		intron (NM_001018000, intron 2 of 7)	intron (NM_001018000, intron 2 of 7)	22989	NM_001017999	23254	Hs.368823	NM_015209	ENSG00000189337	KAZN	KAZ	kazrin, periplakin interacting protein	protein-coding
538	UPN538	chr1	15259244	15263109	chr1:15259244-15263109	1	1	2	0		0		538	chr1	15259244	15263109	+	0		intron (NM_052929, intron 2 of 30)	MIR|SINE|MIR	13951	NM_052929	114827	Hs.659997	NM_052929	ENSG00000142621	FHAD1	-	forkhead associated phosphopeptide binding domain 1	protein-coding
545	UPN545	chr1	15410295	15417925	chr1:15410295-15417925	1	1	1	0		0		545	chr1	15410295	15417925	+	0		intron (NM_024329, intron 1 of 3)	intron (NM_024329, intron 1 of 3)	4215	NM_024329	79180	Hs.465374	NM_024329	ENSG00000142634	EFHD2	SWS1	EF-hand domain family member D2	protein-coding
547	UPN547	chr1	15525192	15527006	chr1:15525192-15527006	1	1	1	0		0		547	chr1	15525192	15527006	+	0		promoter-TSS (NR_109898)	promoter-TSS (NR_109898)	-714	NR_109898	23341	Hs.655410	NM_015291	ENSG00000116138	DNAJC16	-	DnaJ heat shock protein family (Hsp40) member C16	protein-coding
555	UPN555	chr1	15680932	15682074	chr1:15680932-15682074	1	1	1	0		0		555	chr1	15680932	15682074	+	0		Intergenic	Intergenic	-2800	NM_015164	23207	Hs.646775	NM_015164	ENSG00000116786	PLEKHM2	SKIP	pleckstrin homology and RUN domain containing M2	protein-coding
556	UPN556	chr1	15682500	15684214	chr1:15682500-15684214	1	1	1	0		0		556	chr1	15682500	15684214	+	0		promoter-TSS (NM_015164)	promoter-TSS (NM_015164)	-946	NM_015164	23207	Hs.646775	NM_015164	ENSG00000116786	PLEKHM2	SKIP	pleckstrin homology and RUN domain containing M2	protein-coding
560	UPN560	chr1	15702782	15705752	chr1:15702782-15705752	1	1	1	0		0		560	chr1	15702782	15705752	+	0		intron (NM_015164, intron 1 of 19)	L2a|LINE|L2	19964	NM_015164	23207	Hs.646775	NM_015164	ENSG00000116786	PLEKHM2	SKIP	pleckstrin homology and RUN domain containing M2	protein-coding
562	UPN562	chr1	15758837	15760230	chr1:15758837-15760230	1	1	1	0		0		562	chr1	15758837	15760230	+	0		intron (NM_001024216, intron 1 of 6)	intron (NM_001024216, intron 1 of 6)	773	NM_001024216	54751	Hs.530101	NM_017556	ENSG00000162458	FBLIM1	CAL|FBLP-1|FBLP1	filamin binding LIM protein 1	protein-coding
563	UPN563	chr1	15760668	15761476	chr1:15760668-15761476	1	1	1	0		0		563	chr1	15760668	15761476	+	0		intron (NM_001024216, intron 1 of 6)	intron (NM_001024216, intron 1 of 6)	2312	NM_001024216	54751	Hs.530101	NM_017556	ENSG00000162458	FBLIM1	CAL|FBLP-1|FBLP1	filamin binding LIM protein 1	protein-coding
565	UPN565	chr1	15795444	15797082	chr1:15795444-15797082	1	1	1	0		0		565	chr1	15795444	15797082	+	0		Intergenic	FLAM_C|SINE|Alu	11436	NM_001089591	440567	Hs.568229	NM_001089591	ENSG00000233954	UQCRHL	-	ubiquinol-cytochrome c reductase hinge protein like	protein-coding
566	UPN566	chr1	15797628	15798379	chr1:15797628-15798379	1	1	1	0		0		566	chr1	15797628	15798379	+	0		Intergenic	Intergenic	9696	NM_001089591	440567	Hs.568229	NM_001089591	ENSG00000233954	UQCRHL	-	ubiquinol-cytochrome c reductase hinge protein like	protein-coding
567	UPN567	chr1	15798992	15801295	chr1:15798992-15801295	1	1	1	0		0		567	chr1	15798992	15801295	+	0		Intergenic	Intergenic	7556	NM_001089591	440567	Hs.568229	NM_001089591	ENSG00000233954	UQCRHL	-	ubiquinol-cytochrome c reductase hinge protein like	protein-coding
568	UPN568	chr1	15829452	15829993	chr1:15829452-15829993	1	1	1	0		0		568	chr1	15829452	15829993	+	0		Intergenic	AluJr4|SINE|Alu	-18142	NM_015001	23013	Hs.744843	NM_015001	ENSG00000065526	SPEN	HIAA0929|MINT|RBM15C|SHARP	spen family transcriptional repressor	protein-coding
573	UPN573	chr1	15836113	15838147	chr1:15836113-15838147	1	1	2	0		0		573	chr1	15836113	15838147	+	0		intron (NR_024279, intron 1 of 1)	intron (NR_024279, intron 1 of 1)	-10734	NM_015001	23013	Hs.744843	NM_015001	ENSG00000065526	SPEN	HIAA0929|MINT|RBM15C|SHARP	spen family transcriptional repressor	protein-coding
575	UPN575	chr1	15884459	15887525	chr1:15884459-15887525	2	1	1	0		0		575	chr1	15884459	15887525	+	0		intron (NM_015001, intron 3 of 14)	intron (NM_015001, intron 3 of 14)	14843	NR_039973
577	UPN577	chr1	15947807	15952988	chr1:15947807-15952988	2	1	1	0		0		577	chr1	15947807	15952988	+	0		intron (NM_001287603, intron 2 of 15)	intron (NM_001287603, intron 2 of 15)	25735	NM_001324138	7709	Hs.433764	NM_003443	ENSG00000116809	ZBTB17	MIZ-1|ZNF151|ZNF60|pHZ-67	zinc finger and BTB domain containing 17	protein-coding
581	UPN581	chr1	16012501	16020572	chr1:16012501-16020572	3	1	4	0		0		581	chr1	16012501	16020572	+	0		intron (NM_001349687, intron 2 of 2)	intron (NM_001349687, intron 2 of 2)	2254	NM_014424	27129	Hs.502612	NM_014424	ENSG00000173641	HSPB7	cvHSP	heat shock protein family B (small) member 7	protein-coding
582	UPN582	chr1	16075506	16076865	chr1:16075506-16076865	1	1	1	0		0		582	chr1	16075506	16076865	+	0		Intergenic	Intergenic	-2553	NM_182623	348487	Hs.126825	NM_182623	ENSG00000185519	FAM131C	C1orf117	family with sequence similarity 131 member C	protein-coding
587	UPN587	chr1	16143195	16147844	chr1:16143195-16147844	1	1	1	0		0		587	chr1	16143195	16147844	+	0		intron (NM_001329090, intron 2 of 15)	intron (NM_001329090, intron 2 of 15)	10590	NM_004431	1969	Hs.171596	NM_004431	ENSG00000142627	EPHA2	ARCC2|CTPA|CTPP1|CTRCT6|ECK	EPH receptor A2	protein-coding
588	UPN588	chr1	16150269	16156565	chr1:16150269-16156565	1	1	4	0		0		588	chr1	16150269	16156565	+	0		intron (NM_004431, intron 1 of 16)	intron (NM_004431, intron 1 of 16)	2692	NM_004431	1969	Hs.171596	NM_004431	ENSG00000142627	EPHA2	ARCC2|CTPA|CTPP1|CTRCT6|ECK	EPH receptor A2	protein-coding
589	UPN589	chr1	16173121	16178027	chr1:16173121-16178027	1	1	2	0		0		589	chr1	16173121	16178027	+	0		Intergenic	Intergenic	-19465	NM_001329090	1969	Hs.171596	NM_004431	ENSG00000142627	EPHA2	ARCC2|CTPA|CTPP1|CTRCT6|ECK	EPH receptor A2	protein-coding
590	UPN590	chr1	16178692	16179459	chr1:16178692-16179459	1	1	1	0		0		590	chr1	16178692	16179459	+	0		Intergenic	MIR1_Amn|SINE|MIR	-22966	NM_001329090	1969	Hs.171596	NM_004431	ENSG00000142627	EPHA2	ARCC2|CTPA|CTPP1|CTRCT6|ECK	EPH receptor A2	protein-coding
591	UPN591	chr1	16180861	16182869	chr1:16180861-16182869	1	1	1	0		0		591	chr1	16180861	16182869	+	0		Intergenic	Intergenic	-25756	NM_001329090	1969	Hs.171596	NM_004431	ENSG00000142627	EPHA2	ARCC2|CTPA|CTPP1|CTRCT6|ECK	EPH receptor A2	protein-coding
596	UPN596	chr1	16206874	16208876	chr1:16206874-16208876	1	1	1	0		0		596	chr1	16206874	16208876	+	0		intron (NM_153213, intron 3 of 15)	CpG-506	4796	NM_153213	128272	Hs.591532	NM_153213	ENSG00000142632	ARHGEF19	WGEF	Rho guanine nucleotide exchange factor 19	protein-coding
597	UPN597	chr1	16216430	16217812	chr1:16216430-16217812	1	1	1	0		0		597	chr1	16216430	16217812	+	0		Intergenic	Intergenic	-4450	NM_153213	128272	Hs.591532	NM_153213	ENSG00000142632	ARHGEF19	WGEF	Rho guanine nucleotide exchange factor 19	protein-coding
598	UPN598	chr1	16236305	16238198	chr1:16236305-16238198	1	1	1	0		0		598	chr1	16236305	16238198	+	0		promoter-TSS (NM_030907)	promoter-TSS (NM_030907)	-87	NM_030907	79363	Hs.546430	NM_030907	ENSG00000132881	CPLANE2	C1orf89|RSG1	ciliogenesis and planar polarity effector 2	protein-coding
599	UPN599	chr1	16246923	16250299	chr1:16246923-16250299	1	2	2	0		0		599	chr1	16246923	16250299	+	0		3' UTR (NM_018994, exon 10 of 10)	3' UTR (NM_018994, exon 10 of 10)	-11447	NM_030907	79363	Hs.546430	NM_030907	ENSG00000132881	CPLANE2	C1orf89|RSG1	ciliogenesis and planar polarity effector 2	protein-coding
600	UPN600	chr1	16250831	16251907	chr1:16250831-16251907	1	1	1	0		0		600	chr1	16250831	16251907	+	0		exon (NM_018994, exon 10 of 10)	exon (NM_018994, exon 10 of 10)	-14205	NM_030907	79363	Hs.546430	NM_030907	ENSG00000132881	CPLANE2	C1orf89|RSG1	ciliogenesis and planar polarity effector 2	protein-coding
604	UPN604	chr1	16352597	16353144	chr1:16352597-16353144	1	1	1	0		0		604	chr1	16352597	16353144	+	0		promoter-TSS (NM_018994)	promoter-TSS (NM_018994)	-379	NM_018994	54455	Hs.522384	NM_018994	ENSG00000037637	FBXO42	Fbx42|JFK	F-box protein 42	protein-coding
611	UPN611	chr1	16440150	16441911	chr1:16440150-16441911	1	1	1	0		0		611	chr1	16440150	16441911	+	0		intron (NM_001145277, intron 1 of 6)	CpG	358	NM_018090	55707	Hs.437385	NM_018090	ENSG00000157191	NECAP2	-	NECAP endocytosis associated 2	protein-coding
612	UPN612	chr1	16442441	16443178	chr1:16442441-16443178	1	1	1	0		0		612	chr1	16442441	16443178	+	0		intron (NM_001145277, intron 1 of 6)	AluJb|SINE|Alu	2137	NM_018090	55707	Hs.437385	NM_018090	ENSG00000157191	NECAP2	-	NECAP endocytosis associated 2	protein-coding
613	UPN613	chr1	16443298	16444423	chr1:16443298-16444423	1	1	1	0		0		613	chr1	16443298	16444423	+	0		intron (NM_001145277, intron 2 of 6)	intron (NM_001145277, intron 2 of 6)	3188	NM_018090	55707	Hs.437385	NM_018090	ENSG00000157191	NECAP2	-	NECAP endocytosis associated 2	protein-coding
616	UPN616	chr1	16613391	16614031	chr1:16613391-16614031	1	1	1	0		0		616	chr1	16613391	16614031	+	0		promoter-TSS (NM_017940)	promoter-TSS (NM_017940)	-106	NM_017940	55672	Hs.467587	NM_017940	ENSG00000219481	NBPF1	AB13|AB14|AB23|AD2|NBG|NBPF	NBPF member 1	protein-coding
629	UPN629	chr1	17011129	17011685	chr1:17011129-17011685	1	1	1	0		0		629	chr1	17011129	17011685	+	0		intron (NM_001141973, intron 1 of 28)	CpG	565	NM_022089	23400	Hs.128866	NM_022089	ENSG00000159363	ATP13A2	CLN12|HSA9947|KRPPD|PARK9|SPG78	ATPase cation transporting 13A2	protein-coding
636	UPN636	chr1	17098707	17099359	chr1:17098707-17099359	1	1	1	0		0		636	chr1	17098707	17099359	+	0		intron (NM_007365, intron 3 of 15)	intron (NM_007365, intron 3 of 15)	20420	NM_007365	11240	Hs.33455	NM_007365	ENSG00000117115	PADI2	PAD-H19|PAD2|PDI2	peptidyl arginine deiminase 2	protein-coding
637	UPN637	chr1	17119052	17120210	chr1:17119052-17120210	1	1	1	0		0		637	chr1	17119052	17120210	+	0		promoter-TSS (NM_007365)	promoter-TSS (NM_007365)	-178	NM_007365	11240	Hs.33455	NM_007365	ENSG00000117115	PADI2	PAD-H19|PAD2|PDI2	peptidyl arginine deiminase 2	protein-coding
640	UPN640	chr1	17531837	17532278	chr1:17531837-17532278	1	1	1	0		0		640	chr1	17531837	17532278	+	0		Intergenic	Intergenic	-7778	NR_137288	55160	Hs.443460	NM_018125	ENSG00000074964	ARHGEF10L	GrinchGEF	Rho guanine nucleotide exchange factor 10 like	protein-coding
642	UPN642	chr1	17539961	17541322	chr1:17539961-17541322	1	1	1	0		0		642	chr1	17539961	17541322	+	0		intron (NR_137287, intron 1 of 29)	intron (NR_137287, intron 1 of 29)	806	NM_018125	55160	Hs.443460	NM_018125	ENSG00000074964	ARHGEF10L	GrinchGEF	Rho guanine nucleotide exchange factor 10 like	protein-coding
644	UPN644	chr1	17560839	17563163	chr1:17560839-17563163	1	1	1	0		0		644	chr1	17560839	17563163	+	0		intron (NR_137287, intron 1 of 29)	MIRb|SINE|MIR	-18552	NM_001319837	55160	Hs.443460	NM_018125	ENSG00000074964	ARHGEF10L	GrinchGEF	Rho guanine nucleotide exchange factor 10 like	protein-coding
647	UPN647	chr1	17567671	17571268	chr1:17567671-17571268	1	1	1	0		0		647	chr1	17567671	17571268	+	0		intron (NR_137287, intron 1 of 29)	intron (NR_137287, intron 1 of 29)	-11084	NM_001319837	55160	Hs.443460	NM_018125	ENSG00000074964	ARHGEF10L	GrinchGEF	Rho guanine nucleotide exchange factor 10 like	protein-coding
650	UPN650	chr1	17615137	17616635	chr1:17615137-17616635	1	1	1	0		0		650	chr1	17615137	17616635	+	0		intron (NR_137287, intron 8 of 29)	intron (NR_137287, intron 8 of 29)	-2427	NM_001319838	55160	Hs.443460	NM_018125	ENSG00000074964	ARHGEF10L	GrinchGEF	Rho guanine nucleotide exchange factor 10 like	protein-coding
654	UPN654	chr1	17628353	17628980	chr1:17628353-17628980	1	1	1	0		0		654	chr1	17628353	17628980	+	0		intron (NM_001011722, intron 13 of 26)	intron (NM_001011722, intron 13 of 26)	10353	NM_001328124	55160	Hs.443460	NM_018125	ENSG00000074964	ARHGEF10L	GrinchGEF	Rho guanine nucleotide exchange factor 10 like	protein-coding
655	UPN655	chr1	17629281	17633343	chr1:17629281-17633343	1	1	2	0		0		655	chr1	17629281	17633343	+	0		intron (NM_001011722, intron 13 of 26)	intron (NM_001011722, intron 13 of 26)	12999	NM_001328124	55160	Hs.443460	NM_018125	ENSG00000074964	ARHGEF10L	GrinchGEF	Rho guanine nucleotide exchange factor 10 like	protein-coding
656	UPN656	chr1	17633671	17636706	chr1:17633671-17636706	1	1	1	0		0		656	chr1	17633671	17636706	+	0		intron (NM_001011722, intron 16 of 26)	intron (NM_001011722, intron 16 of 26)	16875	NM_001328124	55160	Hs.443460	NM_018125	ENSG00000074964	ARHGEF10L	GrinchGEF	Rho guanine nucleotide exchange factor 10 like	protein-coding
659	UPN659	chr1	17764538	17768690	chr1:17764538-17768690	2	1	2	0		0		659	chr1	17764538	17768690	+	0		intron (NM_030812, intron 1 of 2)	MIR|SINE|MIR	11301	NM_030812	81569	Hs.2149	NM_030812	ENSG00000117148	ACTL8	CT57	actin like 8	protein-coding
663	UPN663	chr1	18109098	18111103	chr1:18109098-18111103	1	1	1	0		0		663	chr1	18109098	18111103	+	0		intron (NM_032880, intron 1 of 9)	CpG	2354	NM_032880	84966	Hs.212511	NM_032880	ENSG00000117154	IGSF21	-	immunoglobin superfamily member 21	protein-coding
664	UPN664	chr1	18160799	18161974	chr1:18160799-18161974	1	1	1	0		0		664	chr1	18160799	18161974	+	0		intron (NM_032880, intron 1 of 9)	MIRb|SINE|MIR	53640	NM_032880	84966	Hs.212511	NM_032880	ENSG00000117154	IGSF21	-	immunoglobin superfamily member 21	protein-coding
673	UPN673	chr1	18907267	18908912	chr1:18907267-18908912	1	1	1	0		0		673	chr1	18907267	18908912	+	0		3' UTR (NM_001136265, exon 9 of 9)	3' UTR (NM_001136265, exon 9 of 9)	-5290	NM_001319218	8659	Hs.77448	NM_003748	ENSG00000159423	ALDH4A1	ALDH4|P5CD|P5CDh	aldehyde dehydrogenase 4 family member A1	protein-coding
674	UPN674	chr1	18921452	18925556	chr1:18921452-18925556	1	2	1	0		0		674	chr1	18921452	18925556	+	0		intron (NM_001136265, intron 1 of 8)	MIRb|SINE|MIR	-20705	NM_001319218	8659	Hs.77448	NM_003748	ENSG00000159423	ALDH4A1	ALDH4|P5CD|P5CDh	aldehyde dehydrogenase 4 family member A1	protein-coding
675	UPN675	chr1	18926147	18929462	chr1:18926147-18929462	2	1	1	0		0		675	chr1	18926147	18929462	+	0		intron (NM_001136265, intron 1 of 8)	intron (NM_001136265, intron 1 of 8)	-25005	NM_001319218	8659	Hs.77448	NM_003748	ENSG00000159423	ALDH4A1	ALDH4|P5CD|P5CDh	aldehyde dehydrogenase 4 family member A1	protein-coding
677	UPN677	chr1	18946826	18953081	chr1:18946826-18953081	1	2	1	0		0		677	chr1	18946826	18953081	+	0		intron (NM_001136265, intron 1 of 8)	intron (NM_001136265, intron 1 of 8)	6379	NM_001136265	126917	Hs.466625	NM_001136265	ENSG00000169991	IFFO2	-	intermediate filament family orphan 2	protein-coding
682	UPN682	chr1	19009709	19012574	chr1:19009709-19012574	2	1	2	0		0		682	chr1	19009709	19012574	+	0		Intergenic	Intergenic	-54809	NM_001136265	126917	Hs.466625	NM_001136265	ENSG00000169991	IFFO2	-	intermediate filament family orphan 2	protein-coding
683	UPN683	chr1	19080582	19082078	chr1:19080582-19082078	1	1	1	0		0		683	chr1	19080582	19082078	+	0		intron (NM_020765, intron 103 of 105)	intron (NM_020765, intron 103 of 105)	-124998	NM_001136265	126917	Hs.466625	NM_001136265	ENSG00000169991	IFFO2	-	intermediate filament family orphan 2	protein-coding
686	UPN686	chr1	19210471	19211481	chr1:19210471-19211481	1	1	1	0		0		686	chr1	19210471	19211481	+	0		promoter-TSS (NM_020765)	promoter-TSS (NM_020765)	590	NR_135114	101927895	Hs.660534	NR_135114	ENSG00000230424	LOC101927895	-	uncharacterized LOC101927895	ncRNA
691	UPN691	chr1	19384207	19387993	chr1:19384207-19387993	1	1	1	0		0		691	chr1	19384207	19387993	+	0		intron (NM_001206541, intron 3 of 8)	intron (NM_001206541, intron 3 of 8)	73854	NM_001040125	54896	Hs.647620	NM_017765	ENSG00000040487	PQLC2	-	PQ loop repeat containing 2	protein-coding
693	UPN693	chr1	19389855	19394018	chr1:19389855-19394018	2	1	1	0		0		693	chr1	19389855	19394018	+	0		intron (NM_001206541, intron 3 of 8)	AluSz6|SINE|Alu	79690	NM_001040125	54896	Hs.647620	NM_017765	ENSG00000040487	PQLC2	-	PQ loop repeat containing 2	protein-coding
695	UPN695	chr1	19397405	19401170	chr1:19397405-19401170	2	1	1	0		0		695	chr1	19397405	19401170	+	0		intron (NM_001206541, intron 3 of 8)	intron (NM_001206541, intron 3 of 8)	85420	NM_001282162	832	Hs.432760	NM_004930	ENSG00000077549	CAPZB	CAPB|CAPPB|CAPZ	capping actin protein of muscle Z-line subunit beta	protein-coding
697	UPN697	chr1	19413546	19416954	chr1:19413546-19416954	1	1	1	0		0		697	chr1	19413546	19416954	+	0		intron (NM_001206541, intron 3 of 8)	intron (NM_001206541, intron 3 of 8)	69457	NM_001282162	832	Hs.432760	NM_004930	ENSG00000077549	CAPZB	CAPB|CAPPB|CAPZ	capping actin protein of muscle Z-line subunit beta	protein-coding
702	UPN702	chr1	19425777	19428115	chr1:19425777-19428115	1	1	1	0		0		702	chr1	19425777	19428115	+	0		intron (NM_001206540, intron 1 of 9)	intron (NM_001206540, intron 1 of 9)	57761	NM_001282162	832	Hs.432760	NM_004930	ENSG00000077549	CAPZB	CAPB|CAPPB|CAPZ	capping actin protein of muscle Z-line subunit beta	protein-coding
703	UPN703	chr1	19428663	19430377	chr1:19428663-19430377	1	1	1	0		0		703	chr1	19428663	19430377	+	0		intron (NM_001206540, intron 1 of 9)	MIRb|SINE|MIR	55187	NM_001282162	832	Hs.432760	NM_004930	ENSG00000077549	CAPZB	CAPB|CAPPB|CAPZ	capping actin protein of muscle Z-line subunit beta	protein-coding
705	UPN705	chr1	19432575	19440624	chr1:19432575-19440624	2	2	2	0		0		705	chr1	19432575	19440624	+	0		intron (NM_001206540, intron 1 of 9)	Tigger7|DNA|TcMar-Tigger	48108	NM_001282162	832	Hs.432760	NM_004930	ENSG00000077549	CAPZB	CAPB|CAPPB|CAPZ	capping actin protein of muscle Z-line subunit beta	protein-coding
707	UPN707	chr1	19442286	19443066	chr1:19442286-19443066	1	1	1	0		0		707	chr1	19442286	19443066	+	0		intron (NM_001206540, intron 1 of 9)	intron (NM_001206540, intron 1 of 9)	42031	NM_001282162	832	Hs.432760	NM_004930	ENSG00000077549	CAPZB	CAPB|CAPPB|CAPZ	capping actin protein of muscle Z-line subunit beta	protein-coding
708	UPN708	chr1	19443477	19444327	chr1:19443477-19444327	1	1	1	0		0		708	chr1	19443477	19444327	+	0		intron (NM_001206540, intron 1 of 9)	Charlie4z|DNA|hAT-Charlie	40805	NM_001282162	832	Hs.432760	NM_004930	ENSG00000077549	CAPZB	CAPB|CAPPB|CAPZ	capping actin protein of muscle Z-line subunit beta	protein-coding
709	UPN709	chr1	19445704	19456112	chr1:19445704-19456112	1	2	3	0		0		709	chr1	19445704	19456112	+	0		intron (NM_001206541, intron 1 of 8)	intron (NM_001206541, intron 1 of 8)	33799	NM_001282162	832	Hs.432760	NM_004930	ENSG00000077549	CAPZB	CAPB|CAPPB|CAPZ	capping actin protein of muscle Z-line subunit beta	protein-coding
710	UPN710	chr1	19456476	19457938	chr1:19456476-19457938	1	2	1	0		0		710	chr1	19456476	19457938	+	0		intron (NM_001206541, intron 1 of 8)	intron (NM_001206541, intron 1 of 8)	27500	NM_001282162	832	Hs.432760	NM_004930	ENSG00000077549	CAPZB	CAPB|CAPPB|CAPZ	capping actin protein of muscle Z-line subunit beta	protein-coding
713	UPN713	chr1	19464885	19466581	chr1:19464885-19466581	1	1	1	0		0		713	chr1	19464885	19466581	+	0		intron (NM_001206541, intron 1 of 8)	intron (NM_001206541, intron 1 of 8)	18974	NM_001282162	832	Hs.432760	NM_004930	ENSG00000077549	CAPZB	CAPB|CAPPB|CAPZ	capping actin protein of muscle Z-line subunit beta	protein-coding
714	UPN714	chr1	19467134	19470557	chr1:19467134-19470557	2	3	2	0		0		714	chr1	19467134	19470557	+	0		intron (NM_001206541, intron 1 of 8)	intron (NM_001206541, intron 1 of 8)	15862	NM_001282162	832	Hs.432760	NM_004930	ENSG00000077549	CAPZB	CAPB|CAPPB|CAPZ	capping actin protein of muscle Z-line subunit beta	protein-coding
716	UPN716	chr1	19474892	19480871	chr1:19474892-19480871	1	2	1	0		0		716	chr1	19474892	19480871	+	0		intron (NM_001206541, intron 1 of 8)	FLAM_A|SINE|Alu	6826	NM_001282162	832	Hs.432760	NM_004930	ENSG00000077549	CAPZB	CAPB|CAPPB|CAPZ	capping actin protein of muscle Z-line subunit beta	protein-coding
718	UPN718	chr1	19485891	19488303	chr1:19485891-19488303	1	1	1	0		0		718	chr1	19485891	19488303	+	0		Intergenic	L2a|LINE|L2	-1456	NM_001313932	832	Hs.432760	NM_004930	ENSG00000077549	CAPZB	CAPB|CAPPB|CAPZ	capping actin protein of muscle Z-line subunit beta	protein-coding
719	UPN719	chr1	19494105	19496787	chr1:19494105-19496787	1	1	1	0		0		719	chr1	19494105	19496787	+	0		Intergenic	L2c|LINE|L2	-9805	NM_001313932	832	Hs.432760	NM_004930	ENSG00000077549	CAPZB	CAPB|CAPPB|CAPZ	capping actin protein of muscle Z-line subunit beta	protein-coding
720	UPN720	chr1	19504309	19507840	chr1:19504309-19507840	2	2	2	0		0		720	chr1	19504309	19507840	+	0		Intergenic	Intergenic	-20433	NM_001313932	832	Hs.432760	NM_004930	ENSG00000077549	CAPZB	CAPB|CAPPB|CAPZ	capping actin protein of muscle Z-line subunit beta	protein-coding
724	UPN724	chr1	19597323	19598504	chr1:19597323-19598504	1	1	1	0		0		724	chr1	19597323	19598504	+	0		intron (NM_001204089, intron 1 of 3)	MIRc|SINE|MIR	936	NM_001032363	440574	Hs.466662	NM_001032363	ENSG00000173436	MINOS1	C1orf151|MIO10|Mic10	mitochondrial inner membrane organizing system 1	protein-coding
725	UPN725	chr1	19602881	19603751	chr1:19602881-19603751	1	1	1	0		0		725	chr1	19602881	19603751	+	0		intron (NM_001204088, intron 2 of 4)	AluSq2|SINE|Alu	-4491	NR_077246	644068	Hs.660760	NR_077246		RPS14P3	RPS14_1_16	ribosomal protein S14 pseudogene 3	pseudo
727	UPN727	chr1	19643293	19643971	chr1:19643293-19643971	1	1	1	0		0		727	chr1	19643293	19643971	+	0		promoter-TSS (NM_005380)	promoter-TSS (NM_005380)	-82	NM_001204084	4681	Hs.654502	NM_005380	ENSG00000158747	NBL1	D1S1733E|DAN|DAND1|NB|NO3	neuroblastoma 1, DAN family BMP antagonist	protein-coding
728	UPN728	chr1	19644762	19647223	chr1:19644762-19647223	1	1	1	0		0		728	chr1	19644762	19647223	+	0		exon (NM_001204086, exon 1 of 4)	exon (NM_001204086, exon 1 of 4)	226	NM_001204086	4681	Hs.654502	NM_005380	ENSG00000158747	NBL1	D1S1733E|DAN|DAND1|NB|NO3	neuroblastoma 1, DAN family BMP antagonist	protein-coding
730	UPN730	chr1	19650181	19652675	chr1:19650181-19652675	2	1	2	0		0		730	chr1	19650181	19652675	+	0		intron (NM_001278166, intron 1 of 3)	intron (NM_001278166, intron 1 of 3)	3818	NM_001278166	4681	Hs.654502	NM_005380	ENSG00000158747	NBL1	D1S1733E|DAN|DAND1|NB|NO3	neuroblastoma 1, DAN family BMP antagonist	protein-coding
737	UPN737	chr1	20185292	20187529	chr1:20185292-20187529	1	1	1	0		0		737	chr1	20185292	20187529	+	0		promoter-TSS (NR_110078)	promoter-TSS (NR_110078)	76	NR_110078	101928017	Hs.550803	NR_110078	ENSG00000225986	UBXN10-AS1	-	UBXN10 antisense RNA 1	ncRNA
745	UPN745	chr1	20588713	20590777	chr1:20588713-20590777	1	1	1	0		0		745	chr1	20588713	20590777	+	0		intron (NM_001785, intron 1 of 3)	MIR3|SINE|MIR	794	NM_001785	978	Hs.466910	NM_001785	ENSG00000158825	CDA	CDD	cytidine deaminase	protein-coding
751	UPN751	chr1	20613574	20613879	chr1:20613574-20613879	1	1	1	0		0		751	chr1	20613574	20613879	+	0		intron (NM_001785, intron 2 of 3)	intron (NM_001785, intron 2 of 3)	-19729	NM_032409	65018	Hs.389171	NM_032409	ENSG00000158828	PINK1	BRPK|PARK6	PTEN induced putative kinase 1	protein-coding
754	UPN754	chr1	20683939	20686184	chr1:20683939-20686184	1	1	1	0		0		754	chr1	20683939	20686184	+	0		intron (NM_020816, intron 9 of 14)	intron (NM_020816, intron 9 of 14)	-23517	NM_005216	1650	Hs.523145	NM_005216	ENSG00000244038	DDOST	AGER1|CDG1R|GATD6|OKSWcl45|OST|OST48|WBP1	dolichyl-diphosphooligosaccharide--protein glycosyltransferase non-catalytic subunit	protein-coding
766	UPN766	chr1	21252432	21252842	chr1:21252432-21252842	1	1	1	0		0		766	chr1	21252432	21252842	+	0		intron (NM_001113348, intron 8 of 18)	intron (NM_001113348, intron 8 of 18)	27053	NM_001113347	1889	Hs.195080	NM_001397	ENSG00000117298	ECE1	ECE	endothelin converting enzyme 1	protein-coding
768	UPN768	chr1	21260225	21264149	chr1:21260225-21264149	1	1	1	0		0		768	chr1	21260225	21264149	+	0		intron (NM_001113348, intron 4 of 18)	intron (NM_001113348, intron 4 of 18)	17503	NM_001113347	1889	Hs.195080	NM_001397	ENSG00000117298	ECE1	ECE	endothelin converting enzyme 1	protein-coding
769	UPN769	chr1	21277074	21281645	chr1:21277074-21281645	1	1	1	0		0		769	chr1	21277074	21281645	+	0		exon (NM_001113347, exon 1 of 17)	exon (NM_001113347, exon 1 of 17)	331	NM_001113347	1889	Hs.195080	NM_001397	ENSG00000117298	ECE1	ECE	endothelin converting enzyme 1	protein-coding
770	UPN770	chr1	21288504	21291687	chr1:21288504-21291687	1	1	2	0		0		770	chr1	21288504	21291687	+	0		exon (NM_001397, exon 2 of 19)	exon (NM_001397, exon 2 of 19)	178	NM_001113349	1889	Hs.195080	NM_001397	ENSG00000117298	ECE1	ECE	endothelin converting enzyme 1	protein-coding
771	UPN771	chr1	21292209	21296267	chr1:21292209-21296267	1	1	1	0		0		771	chr1	21292209	21296267	+	0		intron (NR_038404, intron 2 of 2)	intron (NR_038404, intron 2 of 2)	948	NR_038404	100506801	Hs.663049	NR_038404	ENSG00000231105	LOC100506801	-	uncharacterized LOC100506801	ncRNA
775	UPN775	chr1	21316871	21320321	chr1:21316871-21320321	1	1	1	0		0		775	chr1	21316871	21320321	+	0		intron (NM_001113348, intron 1 of 18)	MIR3|SINE|MIR	25306	NR_038404	100506801	Hs.663049	NR_038404	ENSG00000231105	LOC100506801	-	uncharacterized LOC100506801	ncRNA
777	UPN777	chr1	21321939	21328386	chr1:21321939-21328386	1	2	2	0		0		777	chr1	21321939	21328386	+	0		intron (NM_001113348, intron 1 of 18)	intron (NM_001113348, intron 1 of 18)	20379	NM_001113348	1889	Hs.195080	NM_001397	ENSG00000117298	ECE1	ECE	endothelin converting enzyme 1	protein-coding
782	UPN782	chr1	21332870	21336420	chr1:21332870-21336420	1	2	1	0		0		782	chr1	21332870	21336420	+	0		intron (NM_001113348, intron 1 of 18)	intron (NM_001113348, intron 1 of 18)	10896	NM_001113348	1889	Hs.195080	NM_001397	ENSG00000117298	ECE1	ECE	endothelin converting enzyme 1	protein-coding
783	UPN783	chr1	21336831	21340702	chr1:21336831-21340702	1	1	1	0		0		783	chr1	21336831	21340702	+	0		intron (NM_001113348, intron 1 of 18)	intron (NM_001113348, intron 1 of 18)	6775	NM_001113348	1889	Hs.195080	NM_001397	ENSG00000117298	ECE1	ECE	endothelin converting enzyme 1	protein-coding
784	UPN784	chr1	21341175	21345882	chr1:21341175-21345882	1	2	3	0		0		784	chr1	21341175	21345882	+	0		intron (NM_001113348, intron 1 of 18)	intron (NM_001113348, intron 1 of 18)	2013	NM_001113348	1889	Hs.195080	NM_001397	ENSG00000117298	ECE1	ECE	endothelin converting enzyme 1	protein-coding
796	UPN796	chr1	21894061	21897774	chr1:21894061-21897774	1	1	1	0		0		796	chr1	21894061	21897774	+	0		intron (NM_005529, intron 3 of 96)	intron (NM_005529, intron 3 of 96)	41380	NM_005529	3339	Hs.562227	NM_005529	ENSG00000142798	HSPG2	HSPG|PLC|PRCAN|SJA|SJS|SJS1	heparan sulfate proteoglycan 2	protein-coding
798	UPN798	chr1	21900211	21903284	chr1:21900211-21903284	1	2	1	0		0		798	chr1	21900211	21903284	+	0		intron (NM_005529, intron 1 of 96)	intron (NM_005529, intron 1 of 96)	35550	NM_005529	3339	Hs.562227	NM_005529	ENSG00000142798	HSPG2	HSPG|PLC|PRCAN|SJA|SJS|SJS1	heparan sulfate proteoglycan 2	protein-coding
799	UPN799	chr1	21903653	21908145	chr1:21903653-21908145	1	1	1	0		0		799	chr1	21903653	21908145	+	0		intron (NM_005529, intron 1 of 96)	AluJr|SINE|Alu	31398	NM_005529	3339	Hs.562227	NM_005529	ENSG00000142798	HSPG2	HSPG|PLC|PRCAN|SJA|SJS|SJS1	heparan sulfate proteoglycan 2	protein-coding
800	UPN800	chr1	21908590	21915801	chr1:21908590-21915801	1	1	2	0		0		800	chr1	21908590	21915801	+	0		intron (NM_005529, intron 1 of 96)	MIRb|SINE|MIR	25102	NM_005529	3339	Hs.562227	NM_005529	ENSG00000142798	HSPG2	HSPG|PLC|PRCAN|SJA|SJS|SJS1	heparan sulfate proteoglycan 2	protein-coding
801	UPN801	chr1	21918746	21928547	chr1:21918746-21928547	2	1	3	0		0		801	chr1	21918746	21928547	+	0		intron (NM_005529, intron 1 of 96)	intron (NM_005529, intron 1 of 96)	13651	NM_005529	3339	Hs.562227	NM_005529	ENSG00000142798	HSPG2	HSPG|PLC|PRCAN|SJA|SJS|SJS1	heparan sulfate proteoglycan 2	protein-coding
802	UPN802	chr1	21928930	21936982	chr1:21928930-21936982	1	2	5	0		0		802	chr1	21928930	21936982	+	0		intron (NM_005529, intron 1 of 96)	AluJb|SINE|Alu	4341	NM_005529	3339	Hs.562227	NM_005529	ENSG00000142798	HSPG2	HSPG|PLC|PRCAN|SJA|SJS|SJS1	heparan sulfate proteoglycan 2	protein-coding
803	UPN803	chr1	21937597	21942829	chr1:21937597-21942829	1	1	2	0		0		803	chr1	21937597	21942829	+	0		Intergenic	Intergenic	-2916	NM_001291860	3339	Hs.562227	NM_005529	ENSG00000142798	HSPG2	HSPG|PLC|PRCAN|SJA|SJS|SJS1	heparan sulfate proteoglycan 2	protein-coding
804	UPN804	chr1	21943999	21944918	chr1:21943999-21944918	1	1	1	0		0		804	chr1	21943999	21944918	+	0		Intergenic	Intergenic	-7161	NM_001291860	3339	Hs.562227	NM_005529	ENSG00000142798	HSPG2	HSPG|PLC|PRCAN|SJA|SJS|SJS1	heparan sulfate proteoglycan 2	protein-coding
810	UPN810	chr1	22039547	22040969	chr1:22039547-22040969	1	1	1	2	rs10917128,rs72665317	2	rs10917128,rs72665317	810	chr1	22039547	22040969	+	0		Intergenic	Intergenic	-12369	NM_001039802	998	Hs.467637	NM_001791	ENSG00000070831	CDC42	CDC42Hs|G25K|TKS	cell division cycle 42	protein-coding
823	UPN823	chr1	22749896	22751179	chr1:22749896-22751179	1	1	1	0		0		823	chr1	22749896	22751179	+	0		intron (NM_001309193, intron 1 of 16)	MER113|DNA|hAT-Charlie	31020	NR_039832	100616391		NR_039832	ENSG00000265422	MIR4684	-	microRNA 4684	ncRNA
824	UPN824	chr1	23099636	23103695	chr1:23099636-23103695	3	2	1	0		0		824	chr1	23099636	23103695	+	0		intron (NM_001142546, intron 2 of 3)	intron (NM_001142546, intron 2 of 3)	-43731	NR_039614
827	UPN827	chr1	23168979	23170360	chr1:23168979-23170360	1	1	1	0		0		827	chr1	23168979	23170360	+	0		promoter-TSS (NM_033631)	promoter-TSS (NM_033631)	-811	NM_033631	7798	Hs.257900	NM_033631	ENSG00000169641	LUZP1	LUZP	leucine zipper protein 1	protein-coding
828	UPN828	chr1	23177072	23178675	chr1:23177072-23178675	1	1	1	0		0		828	chr1	23177072	23178675	+	0		Intergenic	CpG	-9015	NM_033631	7798	Hs.257900	NM_033631	ENSG00000169641	LUZP1	LUZP	leucine zipper protein 1	protein-coding
834	UPN834	chr1	23393507	23395569	chr1:23393507-23395569	1	1	1	0		0		834	chr1	23393507	23395569	+	0		intron (NM_003196, intron 7 of 10)	intron (NM_003196, intron 7 of 10)	-24674	NM_001077195	80818	Hs.293798	NM_030634	ENSG00000125945	ZNF436	ZNF|Zfp46	zinc finger protein 436	protein-coding
837	UPN837	chr1	23402870	23404168	chr1:23402870-23404168	1	2	1	0		0		837	chr1	23402870	23404168	+	0		intron (NM_003196, intron 5 of 10)	MIRb|SINE|MIR	21260	NM_003196	6920	Hs.446354	NM_003196	ENSG00000204219	TCEA3	TFIIS|TFIIS.H	transcription elongation factor A3	protein-coding
839	UPN839	chr1	23422726	23424643	chr1:23422726-23424643	1	2	1	0		0		839	chr1	23422726	23424643	+	0		intron (NM_003196, intron 1 of 10)	intron (NM_003196, intron 1 of 10)	1095	NM_003196	6920	Hs.446354	NM_003196	ENSG00000204219	TCEA3	TFIIS|TFIIS.H	transcription elongation factor A3	protein-coding
840	UPN840	chr1	23444003	23444865	chr1:23444003-23444865	1	1	1	0		0		840	chr1	23444003	23444865	+	0		intron (NM_001143778, intron 4 of 23)	intron (NM_001143778, intron 4 of 23)	-19655	NM_003196	6920	Hs.446354	NM_003196	ENSG00000204219	TCEA3	TFIIS|TFIIS.H	transcription elongation factor A3	protein-coding
845	UPN845	chr1	23525311	23532056	chr1:23525311-23532056	2	3	3	0		0		845	chr1	23525311	23532056	+	0		TTS (NR_110799)	TTS (NR_110799)	2537	NM_004091	1870	Hs.194333	NM_004091	ENSG00000007968	E2F2	E2F-2	E2F transcription factor 2	protein-coding
847	UPN847	chr1	23553412	23559505	chr1:23553412-23559505	2	2	2	0		0		847	chr1	23553412	23559505	+	0		Intergenic	MIRb|SINE|MIR	3336	NM_002167	3399	Hs.76884	NM_002167	ENSG00000117318	ID3	HEIR-1|bHLHb25	inhibitor of DNA binding 3, HLH protein	protein-coding
848	UPN848	chr1	23560110	23562629	chr1:23560110-23562629	1	1	1	0		0		848	chr1	23560110	23562629	+	0		Intergenic	Intergenic	-1575	NM_002167	3399	Hs.76884	NM_002167	ENSG00000117318	ID3	HEIR-1|bHLHb25	inhibitor of DNA binding 3, HLH protein	protein-coding
849	UPN849	chr1	23563045	23564364	chr1:23563045-23564364	1	1	1	0		0		849	chr1	23563045	23564364	+	0		Intergenic	MIRc|SINE|MIR	-3910	NM_002167	3399	Hs.76884	NM_002167	ENSG00000117318	ID3	HEIR-1|bHLHb25	inhibitor of DNA binding 3, HLH protein	protein-coding
850	UPN850	chr1	23567598	23569192	chr1:23567598-23569192	2	1	1	0		0		850	chr1	23567598	23569192	+	0		Intergenic	CpG	-8601	NM_002167	3399	Hs.76884	NM_002167	ENSG00000117318	ID3	HEIR-1|bHLHb25	inhibitor of DNA binding 3, HLH protein	protein-coding
851	UPN851	chr1	23575630	23577196	chr1:23575630-23577196	1	1	1	0		0		851	chr1	23575630	23577196	+	0		Intergenic	MIR|SINE|MIR	-16619	NM_002167	3399	Hs.76884	NM_002167	ENSG00000117318	ID3	HEIR-1|bHLHb25	inhibitor of DNA binding 3, HLH protein	protein-coding
863	UPN863	chr1	23790315	23793830	chr1:23790315-23793830	2	1	1	0		0		863	chr1	23790315	23793830	+	0		intron (NM_007260, intron 1 of 9)	intron (NM_007260, intron 1 of 9)	916	NM_007260	11313	Hs.533479	NM_007260	ENSG00000011009	LYPLA2	APT-2|APT2|DJ886K2.4	lysophospholipase II	protein-coding
864	UPN864	chr1	23798851	23800519	chr1:23798851-23800519	1	1	1	0		0		864	chr1	23798851	23800519	+	0		promoter-TSS (NM_001127621)	promoter-TSS (NM_001127621)	-115	NM_001127621	2582	Hs.632380	NM_000403	ENSG00000117308	GALE	SDR1E1	UDP-galactose-4-epimerase	protein-coding
873	UPN873	chr1	23980738	23981029	chr1:23980738-23981029	1	1	1	0		0		873	chr1	23980738	23981029	+	0		promoter-TSS (NR_034035)	promoter-TSS (NR_034035)	-420	NM_054016	10772	Hs.3530	NM_006625	ENSG00000188529	SRSF10	FUSIP1|FUSIP2|NSSR|PPP1R149|SFRS13|SFRS13A|SRp38|SRrp40|TASR|TASR1|TASR2	serine and arginine rich splicing factor 10	protein-coding
874	UPN874	chr1	24016184	24017904	chr1:24016184-24017904	2	1	2	0		0		874	chr1	24016184	24017904	+	0		Intergenic	Intergenic	-36581	NM_054016	10772	Hs.3530	NM_006625	ENSG00000188529	SRSF10	FUSIP1|FUSIP2|NSSR|PPP1R149|SFRS13|SFRS13A|SRp38|SRrp40|TASR|TASR1|TASR2	serine and arginine rich splicing factor 10	protein-coding
875	UPN875	chr1	24018554	24018923	chr1:24018554-24018923	1	1	1	0		0		875	chr1	24018554	24018923	+	0		Intergenic	Intergenic	-38275	NM_054016	10772	Hs.3530	NM_006625	ENSG00000188529	SRSF10	FUSIP1|FUSIP2|NSSR|PPP1R149|SFRS13|SFRS13A|SRp38|SRrp40|TASR|TASR1|TASR2	serine and arginine rich splicing factor 10	protein-coding
876	UPN876	chr1	24019211	24022769	chr1:24019211-24022769	2	1	1	0		0		876	chr1	24019211	24022769	+	0		Intergenic	AluSx|SINE|Alu	-40527	NM_054016	10772	Hs.3530	NM_006625	ENSG00000188529	SRSF10	FUSIP1|FUSIP2|NSSR|PPP1R149|SFRS13|SFRS13A|SRp38|SRrp40|TASR|TASR1|TASR2	serine and arginine rich splicing factor 10	protein-coding
880	UPN880	chr1	24293295	24295102	chr1:24293295-24295102	2	1	1	0		0		880	chr1	24293295	24295102	+	0		Intergenic	MIRc|SINE|MIR	-25124	NM_198173	57822	Hs.657920	NM_021180	ENSG00000158055	GRHL3	SOM|TFCP2L4|VWS2	grainyhead like transcription factor 3	protein-coding
886	UPN886	chr1	24416461	24417800	chr1:24416461-24417800	1	1	1	0		0		886	chr1	24416461	24417800	+	0		intron (NM_001322855, intron 2 of 12)	intron (NM_001322855, intron 2 of 12)	1105	NM_001322857	57185	Hs.523442	NM_020448	ENSG00000001461	NIPAL3	DJ462O23.2|NPAL3	NIPA like domain containing 3	protein-coding
889	UPN889	chr1	24503306	24503642	chr1:24503306-24503642	1	1	1	0		0		889	chr1	24503306	24503642	+	0		intron (NM_001251983, intron 1 of 3)	intron (NM_001251983, intron 1 of 3)	577	NM_001251983	11123	Hs.656799	NM_013441	ENSG00000117602	RCAN3	DSCR1L2|MCIP3|RCN3|hRCN3	RCAN family member 3	protein-coding
892	UPN892	chr1	24641373	24642137	chr1:24641373-24642137	1	1	1	0		0		892	chr1	24641373	24642137	+	0		Intergenic	Intergenic	-1348	NM_001303448	10250	Hs.18192	NM_005839	ENSG00000133226	SRRM1	160-KD|POP101|SRM160	serine and arginine repetitive matrix 1	protein-coding
895	UPN895	chr1	24719936	24720770	chr1:24719936-24720770	1	1	1	0		0		895	chr1	24719936	24720770	+	0		Intergenic	Intergenic	-24916	NM_013943	25932	Hs.440544	NM_013943	ENSG00000169504	CLIC4	CLIC4L|H1|MTCLIC|huH1|p64H1	chloride intracellular channel 4	protein-coding
898	UPN898	chr1	24743355	24744911	chr1:24743355-24744911	1	1	1	0		0		898	chr1	24743355	24744911	+	0		Intergenic	Intergenic	-1136	NM_013943	25932	Hs.440544	NM_013943	ENSG00000169504	CLIC4	CLIC4L|H1|MTCLIC|huH1|p64H1	chloride intracellular channel 4	protein-coding
905	UPN905	chr1	24768584	24770243	chr1:24768584-24770243	2	1	1	0		0		905	chr1	24768584	24770243	+	0		intron (NM_013943, intron 1 of 5)	MIRb|SINE|MIR	24144	NM_013943	25932	Hs.440544	NM_013943	ENSG00000169504	CLIC4	CLIC4L|H1|MTCLIC|huH1|p64H1	chloride intracellular channel 4	protein-coding
910	UPN910	chr1	24794244	24795683	chr1:24794244-24795683	1	1	2	0		0		910	chr1	24794244	24795683	+	0		intron (NM_013943, intron 1 of 5)	L1PREC2|LINE|L1	49694	NM_013943	25932	Hs.440544	NM_013943	ENSG00000169504	CLIC4	CLIC4L|H1|MTCLIC|huH1|p64H1	chloride intracellular channel 4	protein-coding
912	UPN912	chr1	24801203	24801663	chr1:24801203-24801663	1	1	1	0		0		912	chr1	24801203	24801663	+	0		intron (NM_013943, intron 2 of 5)	MSTA|LTR|ERVL-MaLR	56164	NM_013943	25932	Hs.440544	NM_013943	ENSG00000169504	CLIC4	CLIC4L|H1|MTCLIC|huH1|p64H1	chloride intracellular channel 4	protein-coding
913	UPN913	chr1	24847966	24849023	chr1:24847966-24849023	1	1	1	0		0		913	chr1	24847966	24849023	+	0		Intergenic	CpG	70922	NR_106789	102465437		NR_106789	ENSG00000278034	MIR6731	hsa-mir-6731	microRNA 6731	ncRNA
924	UPN924	chr1	24930354	24931075	chr1:24930354-24931075	1	1	1	0		0		924	chr1	24930354	24931075	+	0		promoter-TSS (NM_004350)	promoter-TSS (NM_004350)	-435	NM_004350	864	Hs.170019	NM_004350	ENSG00000020633	RUNX3	AML2|CBFA3|PEBP2aC	runt related transcription factor 3	protein-coding
931	UPN931	chr1	25020843	25025271	chr1:25020843-25025271	2	1	1	0		0		931	chr1	25020843	25025271	+	0		promoter-TSS (NR_039623)	promoter-TSS (NR_039623)	-446	NR_039623	100616365		NR_039623	ENSG00000264371	MIR4425	-	microRNA 4425	ncRNA
935	UPN935	chr1	25032901	25035288	chr1:25032901-25035288	1	1	1	0		0		935	chr1	25032901	25035288	+	0		Intergenic	Intergenic	10591	NR_039623	100616365		NR_039623	ENSG00000264371	MIR4425	-	microRNA 4425	ncRNA
937	UPN937	chr1	25233246	25233651	chr1:25233246-25233651	1	1	1	0		0		937	chr1	25233246	25233651	+	0		promoter-TSS (NM_015484)	promoter-TSS (NM_015484)	-926	NM_207170	25949	Hs.20013	NM_015484	ENSG00000117614	SYF2	CBPIN|NTC31|P29|fSAP29	SYF2 pre-mRNA splicing factor	protein-coding
941	UPN941	chr1	25543881	25544953	chr1:25543881-25544953	1	1	1	0		0		941	chr1	25543881	25544953	+	0		intron (NM_015627, intron 1 of 8)	CpG	832	NM_015627	26119	Hs.590911	NM_015627	ENSG00000157978	LDLRAP1	ARH|ARH1|ARH2|FHCB1|FHCB2	low density lipoprotein receptor adaptor protein 1	protein-coding
952	UPN952	chr1	25693943	25697449	chr1:25693943-25697449	2	1	1	0		0		952	chr1	25693943	25697449	+	0		intron (NM_020379, intron 2 of 11)	intron (NM_020379, intron 2 of 11)	78228	NM_020379	57134	Hs.197043	NM_020379	ENSG00000117643	MAN1C1	HMIC|MAN1A3|MAN1C|pp6318	mannosidase alpha class 1C member 1	protein-coding
954	UPN954	chr1	25699283	25701668	chr1:25699283-25701668	1	1	2	0		0		954	chr1	25699283	25701668	+	0		intron (NM_020379, intron 2 of 11)	intron (NM_020379, intron 2 of 11)	83007	NM_020379	57134	Hs.197043	NM_020379	ENSG00000117643	MAN1C1	HMIC|MAN1A3|MAN1C|pp6318	mannosidase alpha class 1C member 1	protein-coding
961	UPN961	chr1	25742884	25744874	chr1:25742884-25744874	1	1	1	0		0		961	chr1	25742884	25744874	+	0		intron (NM_020379, intron 2 of 11)	intron (NM_020379, intron 2 of 11)	-56297	NM_020451	57190	Hs.323396	NM_020451	ENSG00000162430	SELENON	CFTD|MDRS1|RSMD1|RSS|SELN|SEPN1	selenoprotein N	protein-coding
962	UPN962	chr1	25798752	25800040	chr1:25798752-25800040	1	1	1	0		0		962	chr1	25798752	25800040	+	0		promoter-TSS (NM_206926)	promoter-TSS (NM_206926)	-780	NM_020451	57190	Hs.323396	NM_020451	ENSG00000162430	SELENON	CFTD|MDRS1|RSMD1|RSS|SELN|SEPN1	selenoprotein N	protein-coding
964	UPN964	chr1	25804798	25806554	chr1:25804798-25806554	1	1	1	0		0		964	chr1	25804798	25806554	+	0		intron (NM_020451, intron 4 of 12)	intron (NM_020451, intron 4 of 12)	5500	NM_206926	57190	Hs.323396	NM_020451	ENSG00000162430	SELENON	CFTD|MDRS1|RSMD1|RSS|SELN|SEPN1	selenoprotein N	protein-coding
970	UPN970	chr1	25874468	25876280	chr1:25874468-25876280	1	1	1	0		0		970	chr1	25874468	25876280	+	0		Intergenic	CpG	-4121	NM_178422	164091	Hs.523652	NM_178422	ENSG00000182749	PAQR7	MPRA|PGLP|mSR	progestin and adipoQ receptor family member 7	protein-coding
974	UPN974	chr1	25922417	25923470	chr1:25922417-25923470	1	1	1	0		0		974	chr1	25922417	25923470	+	0		Intergenic	CpG	-16066	NM_203399	3925	Hs.209983	NM_005563	ENSG00000117632	STMN1	C1orf215|LAP18|Lag|OP18|PP17|PP19|PR22|SMN	stathmin 1	protein-coding
977	UPN977	chr1	25996681	25997756	chr1:25996681-25997756	1	1	1	0		0		977	chr1	25996681	25997756	+	0		intron (NM_000437, intron 1 of 10)	intron (NM_000437, intron 1 of 10)	939	NM_000437	5051	Hs.477083	NM_000437	ENSG00000158006	PAFAH2	HSD-PLA2	platelet activating factor acetylhydrolase 2	protein-coding
980	UPN980	chr1	26020602	26021435	chr1:26020602-26021435	1	1	1	0		0		980	chr1	26020602	26021435	+	0		promoter-TSS (NM_004455)	promoter-TSS (NM_004455)	-762	NM_004455	2134	Hs.150956	NM_004455	ENSG00000158008	EXTL1	EXTL	exostosin like glycosyltransferase 1	protein-coding
983	UPN983	chr1	26112164	26112980	chr1:26112164-26112980	1	1	1	0		0		983	chr1	26112164	26112980	+	0		5' UTR (NM_001243533, exon 2 of 4)	5' UTR (NM_001243533, exon 2 of 4)	795	NM_152835	149420	Hs.468801	NM_152835	ENSG00000175087	PDIK1L	CLIK1L|STK35L2	PDLIM1 interacting kinase 1 like	protein-coding
991	UPN991	chr1	26275465	26292469	chr1:26275465-26292469	1	3	2	0		0		991	chr1	26275465	26292469	+	0		intron (NM_001077262, intron 8 of 10)	intron (NM_001077262, intron 8 of 10)	4245	NM_031286	83442	Hs.109051	NM_031286	ENSG00000142669	SH3BGRL3	HEL-S-297|SH3BP-1|TIP-B1	SH3 domain binding glutamate rich protein like 3	protein-coding
992	UPN992	chr1	26305695	26306729	chr1:26305695-26306729	1	1	1	0		0		992	chr1	26305695	26306729	+	0		intron (NM_183008, intron 1 of 15)	intron (NM_183008, intron 1 of 15)	492	NM_183008	91544	Hs.145061	NM_145345	ENSG00000158062	UBXN11	COA-1|PP2243|SOC|SOCI|UBXD5	UBX domain protein 11	protein-coding
993	UPN993	chr1	26307077	26308877	chr1:26307077-26308877	1	1	3	0		0		993	chr1	26307077	26308877	+	0		intron (NM_145345, intron 1 of 14)	intron (NM_145345, intron 1 of 14)	-1273	NM_001077262	91544	Hs.145061	NM_145345	ENSG00000158062	UBXN11	COA-1|PP2243|SOC|SOCI|UBXD5	UBX domain protein 11	protein-coding
996	UPN996	chr1	26316163	26319832	chr1:26316163-26319832	2	3	1	0		0		996	chr1	26316163	26319832	+	0		promoter-TSS (NM_001803)	promoter-TSS (NM_001803)	77	NM_001803	1043	Hs.276770	NM_001803	ENSG00000169442	CD52	CDW52|EDDM5	CD52 molecule	protein-coding
1003	UPN1003	chr1	26500016	26500891	chr1:26500016-26500891	1	1	1	0		0		1003	chr1	26500016	26500891	+	0		Intergenic	CpG	28042	NM_005517	3151	Hs.181163	NM_005517	ENSG00000198830	HMGN2	HMG17	high mobility group nucleosomal binding domain 2	protein-coding
1005	UPN1005	chr1	26530085	26532174	chr1:26530085-26532174	2	1	1	0		0		1005	chr1	26530085	26532174	+	0		intron (NM_002953, intron 1 of 21)	intron (NM_002953, intron 1 of 21)	1371	NM_002953	6195	Hs.149957	NM_002953	ENSG00000117676	RPS6KA1	HU-1|MAPKAPK1A|RSK|RSK1|p90Rsk	ribosomal protein S6 kinase A1	protein-coding
1006	UPN1006	chr1	26538278	26547190	chr1:26538278-26547190	2	4	1	0		0		1006	chr1	26538278	26547190	+	0		promoter-TSS (NM_001330441)	promoter-TSS (NM_001330441)	-378	NM_001330441	6195	Hs.149957	NM_002953	ENSG00000117676	RPS6KA1	HU-1|MAPKAPK1A|RSK|RSK1|p90Rsk	ribosomal protein S6 kinase A1	protein-coding
1007	UPN1007	chr1	26619211	26619709	chr1:26619211-26619709	1	1	1	0		0		1007	chr1	26619211	26619709	+	0		Intergenic	Intergenic	64918	NR_031740	100302190		NR_031740	ENSG00000238705	MIR1976	hsa-mir-1976	microRNA 1976	ncRNA
1009	UPN1009	chr1	26626951	26627437	chr1:26626951-26627437	1	1	1	0		0		1009	chr1	26626951	26627437	+	0		Intergenic	AluJr4|SINE|Alu	66937	NR_135804	101928728	Hs.128770	NR_135804	ENSG00000260063	LOC101928728	-	uncharacterized LOC101928728	ncRNA
1012	UPN1012	chr1	26692955	26695668	chr1:26692955-26695668	1	1	1	0		0		1012	chr1	26692955	26695668	+	0		promoter-TSS (NR_135804)	promoter-TSS (NR_135804)	-180	NR_135804	101928728	Hs.128770	NR_135804	ENSG00000260063	LOC101928728	-	uncharacterized LOC101928728	ncRNA
1015	UPN1015	chr1	26722957	26723763	chr1:26722957-26723763	1	1	1	0		0		1015	chr1	26722957	26723763	+	0		intron (NM_139135, intron 1 of 19)	intron (NM_139135, intron 1 of 19)	27327	NM_006015	8289	Hs.468972	NM_006015	ENSG00000117713	ARID1A	B120|BAF250|BAF250a|BM029|C1orf4|CSS2|ELD|MRD14|OSA1|P270|SMARCF1|hELD|hOSA1	AT-rich interaction domain 1A	protein-coding
1016	UPN1016	chr1	26743061	26745674	chr1:26743061-26745674	1	1	1	0		0		1016	chr1	26743061	26745674	+	0		intron (NM_139135, intron 4 of 19)	intron (NM_139135, intron 4 of 19)	-43596	NM_017837	55650	Hs.259605	NM_017837	ENSG00000060642	PIGV	GPI-MT-II|HPMRS1|PIG-V	phosphatidylinositol glycan anchor biosynthesis class V	protein-coding
1018	UPN1018	chr1	26771076	26772861	chr1:26771076-26772861	2	1	1	0		0		1018	chr1	26771076	26772861	+	0		intron (NM_139135, intron 12 of 19)	intron (NM_139135, intron 12 of 19)	-15995	NM_017837	55650	Hs.259605	NM_017837	ENSG00000060642	PIGV	GPI-MT-II|HPMRS1|PIG-V	phosphatidylinositol glycan anchor biosynthesis class V	protein-coding
1019	UPN1019	chr1	26773137	26773911	chr1:26773137-26773911	1	1	1	0		0		1019	chr1	26773137	26773911	+	0		intron (NM_139135, intron 15 of 19)	intron (NM_139135, intron 15 of 19)	-14439	NM_017837	55650	Hs.259605	NM_017837	ENSG00000060642	PIGV	GPI-MT-II|HPMRS1|PIG-V	phosphatidylinositol glycan anchor biosynthesis class V	protein-coding
1021	UPN1021	chr1	26783734	26787894	chr1:26783734-26787894	1	1	2	0		0		1021	chr1	26783734	26787894	+	0		Intergenic	L2a|LINE|L2	-2149	NM_017837	55650	Hs.259605	NM_017837	ENSG00000060642	PIGV	GPI-MT-II|HPMRS1|PIG-V	phosphatidylinositol glycan anchor biosynthesis class V	protein-coding
1023	UPN1023	chr1	26799146	26800574	chr1:26799146-26800574	1	1	1	0		0		1023	chr1	26799146	26800574	+	0		Intergenic	Intergenic	11672	NM_001202554	55650	Hs.259605	NM_017837	ENSG00000060642	PIGV	GPI-MT-II|HPMRS1|PIG-V	phosphatidylinositol glycan anchor biosynthesis class V	protein-coding
1025	UPN1025	chr1	26826036	26826525	chr1:26826036-26826525	1	1	1	0		0		1025	chr1	26826036	26826525	+	0		promoter-TSS (NM_032283)	promoter-TSS (NM_032283)	-430	NM_032283	84243	Hs.523710	NM_032283	ENSG00000204160	ZDHHC18	DHHC-18|DHHC18	zinc finger DHHC-type containing 18	protein-coding
1026	UPN1026	chr1	26827026	26830785	chr1:26827026-26830785	1	2	1	0		0		1026	chr1	26827026	26830785	+	0		intron (NM_032283, intron 1 of 7)	intron (NM_032283, intron 1 of 7)	2195	NM_032283	84243	Hs.523710	NM_032283	ENSG00000204160	ZDHHC18	DHHC-18|DHHC18	zinc finger DHHC-type containing 18	protein-coding
1034	UPN1034	chr1	26888973	26890288	chr1:26888973-26890288	1	1	1	0		0		1034	chr1	26888973	26890288	+	0		TTS (NM_022078)	TTS (NM_022078)	748	NM_018066	54707	Hs.14333	NM_018066	ENSG00000142751	GPN2	ATPBD1B	GPN-loop GTPase 2	protein-coding
1037	UPN1037	chr1	26993663	26995505	chr1:26993663-26995505	1	1	1	0		0		1037	chr1	26993663	26995505	+	0		3' UTR (NM_001013642, exon 1 of 2)	3' UTR (NM_001013642, exon 1 of 2)	880	NM_001013642	388610	Hs.355747	NM_001013642	ENSG00000253368	TRNP1	C1orf225|TNRP	TMF1-regulated nuclear protein 1	protein-coding
1040	UPN1040	chr1	26997880	27002420	chr1:26997880-27002420	2	1	2	0		0		1040	chr1	26997880	27002420	+	0		3' UTR (NM_001013642, exon 2 of 2)	3' UTR (NM_001013642, exon 2 of 2)	6446	NM_001013642	388610	Hs.355747	NM_001013642	ENSG00000253368	TRNP1	C1orf225|TNRP	TMF1-regulated nuclear protein 1	protein-coding
1045	UPN1045	chr1	27031341	27032207	chr1:27031341-27032207	1	1	1	0		0		1045	chr1	27031341	27032207	+	0		Intergenic	Intergenic	-18932	NM_052943	115572	Hs.632378	NM_052943	ENSG00000158246	TENT5B	FAM46B	terminal nucleotidyltransferase 5B	protein-coding
1046	UPN1046	chr1	27098792	27101186	chr1:27098792-27101186	1	1	1	0		0		1046	chr1	27098792	27101186	+	0		non-coding (NR_046474, exon 11 of 11)	non-coding (NR_046474, exon 11 of 11)	55141	NM_003047	6548	Hs.469116	NM_003047	ENSG00000090020	SLC9A1	APNH|LIKNS|NHE-1|NHE1|PPP1R143	solute carrier family 9 member A1	protein-coding
1048	UPN1048	chr1	27116508	27120003	chr1:27116508-27120003	1	2	2	0		0		1048	chr1	27116508	27120003	+	0		intron (NM_003047, intron 1 of 11)	intron (NM_003047, intron 1 of 11)	36875	NM_003047	6548	Hs.469116	NM_003047	ENSG00000090020	SLC9A1	APNH|LIKNS|NHE-1|NHE1|PPP1R143	solute carrier family 9 member A1	protein-coding
1049	UPN1049	chr1	27135733	27139076	chr1:27135733-27139076	1	1	1	0		0		1049	chr1	27135733	27139076	+	0		intron (NM_003047, intron 1 of 11)	MIR3|SINE|MIR	17726	NM_003047	6548	Hs.469116	NM_003047	ENSG00000090020	SLC9A1	APNH|LIKNS|NHE-1|NHE1|PPP1R143	solute carrier family 9 member A1	protein-coding
1056	UPN1056	chr1	27298832	27301466	chr1:27298832-27301466	1	1	1	0		0		1056	chr1	27298832	27301466	+	0		intron (NM_015023, intron 12 of 15)	intron (NM_015023, intron 12 of 15)	-21996	NM_032125	84065	Hs.469171	NM_032125	ENSG00000186501	TMEM222	C1orf160	transmembrane protein 222	protein-coding
1057	UPN1057	chr1	27321887	27323462	chr1:27321887-27323462	1	1	1	0		0		1057	chr1	27321887	27323462	+	0		intron (NM_032125, intron 1 of 5)	intron (NM_032125, intron 1 of 5)	529	NR_037577	84065	Hs.469171	NM_032125	ENSG00000186501	TMEM222	C1orf160	transmembrane protein 222	protein-coding
1058	UPN1058	chr1	27341195	27343676	chr1:27341195-27343676	1	1	1	0		0		1058	chr1	27341195	27343676	+	0		intron (NM_001193308, intron 1 of 14)	intron (NM_001193308, intron 1 of 14)	443	NM_032872	84958	Hs.469175	NM_032872	ENSG00000142765	SYTL1	JFC1|SLP1	synaptotagmin like 1	protein-coding
1062	UPN1062	chr1	27402224	27404122	chr1:27402224-27404122	1	1	1	0		0		1062	chr1	27402224	27404122	+	0		Intergenic	MIRb|SINE|MIR	10529	NM_005281	2827	Hs.66542	NM_005281	ENSG00000181773	GPR3	ACCA	G protein-coupled receptor 3	protein-coding
1063	UPN1063	chr1	27404745	27405298	chr1:27404745-27405298	1	1	1	0		0		1063	chr1	27404745	27405298	+	0		3' UTR (NM_001201404, exon 8 of 8)	3' UTR (NM_001201404, exon 8 of 8)	12377	NM_005281	2827	Hs.66542	NM_005281	ENSG00000181773	GPR3	ACCA	G protein-coupled receptor 3	protein-coding
1064	UPN1064	chr1	27417863	27419570	chr1:27417863-27419570	1	1	1	0		0		1064	chr1	27417863	27419570	+	0		intron (NM_006990, intron 3 of 8)	intron (NM_006990, intron 3 of 8)	26072	NM_005281	2827	Hs.66542	NM_005281	ENSG00000181773	GPR3	ACCA	G protein-coupled receptor 3	protein-coding
1065	UPN1065	chr1	27426796	27432257	chr1:27426796-27432257	1	1	1	0		0		1065	chr1	27426796	27432257	+	0		intron (NM_006990, intron 1 of 8)	AluSq2|SINE|Alu	36882	NM_005281	2827	Hs.66542	NM_005281	ENSG00000181773	GPR3	ACCA	G protein-coupled receptor 3	protein-coding
1066	UPN1066	chr1	27432796	27439831	chr1:27432796-27439831	1	3	3	0		0		1066	chr1	27432796	27439831	+	0		intron (NM_006990, intron 1 of 8)	AluJo|SINE|Alu	43669	NM_005281	2827	Hs.66542	NM_005281	ENSG00000181773	GPR3	ACCA	G protein-coupled receptor 3	protein-coding
1068	UPN1068	chr1	27490542	27492840	chr1:27490542-27492840	1	1	2	0		0		1068	chr1	27490542	27492840	+	0		Intergenic	AluSx|SINE|Alu	-1504	NM_001201404	10163	Hs.469244	NM_006990	ENSG00000158195	WASF2	IMD2|SCAR2|WASF4|WAVE2|dJ393P12.2	WAS protein family member 2	protein-coding
1069	UPN1069	chr1	27503725	27505844	chr1:27503725-27505844	1	1	2	0		0		1069	chr1	27503725	27505844	+	0		Intergenic	Intergenic	-14597	NM_001201404	10163	Hs.469244	NM_006990	ENSG00000158195	WASF2	IMD2|SCAR2|WASF4|WAVE2|dJ393P12.2	WAS protein family member 2	protein-coding
1070	UPN1070	chr1	27513445	27514446	chr1:27513445-27514446	1	1	1	0		0		1070	chr1	27513445	27514446	+	0		Intergenic	Intergenic	-23758	NM_001201404	10163	Hs.469244	NM_006990	ENSG00000158195	WASF2	IMD2|SCAR2|WASF4|WAVE2|dJ393P12.2	WAS protein family member 2	protein-coding
1071	UPN1071	chr1	27522344	27523027	chr1:27522344-27523027	1	1	1	0		0		1071	chr1	27522344	27523027	+	0		Intergenic	Intergenic	-32498	NM_001201404	10163	Hs.469244	NM_006990	ENSG00000158195	WASF2	IMD2|SCAR2|WASF4|WAVE2|dJ393P12.2	WAS protein family member 2	protein-coding
1072	UPN1072	chr1	27525312	27529976	chr1:27525312-27529976	1	1	2	0		0		1072	chr1	27525312	27529976	+	0		Intergenic	Intergenic	-37457	NM_001201404	10163	Hs.469244	NM_006990	ENSG00000158195	WASF2	IMD2|SCAR2|WASF4|WAVE2|dJ393P12.2	WAS protein family member 2	protein-coding
1076	UPN1076	chr1	27542008	27543688	chr1:27542008-27543688	1	1	1	0		0		1076	chr1	27542008	27543688	+	0		intron (NM_001029882, intron 6 of 6)	intron (NM_001029882, intron 6 of 6)	-52661	NM_001201404	10163	Hs.469244	NM_006990	ENSG00000158195	WASF2	IMD2|SCAR2|WASF4|WAVE2|dJ393P12.2	WAS protein family member 2	protein-coding
1077	UPN1077	chr1	27543965	27545256	chr1:27543965-27545256	1	1	1	0		0		1077	chr1	27543965	27545256	+	0		intron (NM_001029882, intron 6 of 6)	intron (NM_001029882, intron 6 of 6)	-54423	NM_001201404	10163	Hs.469244	NM_006990	ENSG00000158195	WASF2	IMD2|SCAR2|WASF4|WAVE2|dJ393P12.2	WAS protein family member 2	protein-coding
1078	UPN1078	chr1	27545547	27546822	chr1:27545547-27546822	1	1	2	0		0		1078	chr1	27545547	27546822	+	0		intron (NM_001029882, intron 6 of 6)	intron (NM_001029882, intron 6 of 6)	-55997	NM_001201404	10163	Hs.469244	NM_006990	ENSG00000158195	WASF2	IMD2|SCAR2|WASF4|WAVE2|dJ393P12.2	WAS protein family member 2	protein-coding
1082	UPN1082	chr1	27554256	27559034	chr1:27554256-27559034	1	1	2	0		0		1082	chr1	27554256	27559034	+	0		intron (NM_001029882, intron 3 of 6)	intron (NM_001029882, intron 3 of 6)	46849	NM_001029882	27245	Hs.469280	NM_001029882	ENSG00000126705	AHDC1	MRD25	AT-hook DNA binding motif containing 1	protein-coding
1085	UPN1085	chr1	27561394	27566495	chr1:27561394-27566495	1	2	2	0		0		1085	chr1	27561394	27566495	+	0		intron (NM_001029882, intron 1 of 6)	intron (NM_001029882, intron 1 of 6)	39550	NM_001029882	27245	Hs.469280	NM_001029882	ENSG00000126705	AHDC1	MRD25	AT-hook DNA binding motif containing 1	protein-coding
1089	UPN1089	chr1	27575905	27577933	chr1:27575905-27577933	1	1	1	0		0		1089	chr1	27575905	27577933	+	0		intron (NM_001029882, intron 1 of 6)	intron (NM_001029882, intron 1 of 6)	26575	NM_001029882	27245	Hs.469280	NM_001029882	ENSG00000126705	AHDC1	MRD25	AT-hook DNA binding motif containing 1	protein-coding
1090	UPN1090	chr1	27589617	27591163	chr1:27589617-27591163	2	1	1	0		0		1090	chr1	27589617	27591163	+	0		intron (NM_001029882, intron 1 of 6)	intron (NM_001029882, intron 1 of 6)	13104	NM_001029882	27245	Hs.469280	NM_001029882	ENSG00000126705	AHDC1	MRD25	AT-hook DNA binding motif containing 1	protein-coding
1093	UPN1093	chr1	27597878	27603721	chr1:27597878-27603721	1	2	2	0		0		1093	chr1	27597878	27603721	+	0		intron (NM_001029882, intron 1 of 6)	intron (NM_001029882, intron 1 of 6)	2695	NM_001029882	27245	Hs.469280	NM_001029882	ENSG00000126705	AHDC1	MRD25	AT-hook DNA binding motif containing 1	protein-coding
1096	UPN1096	chr1	27622955	27627531	chr1:27622955-27627531	1	2	2	0		0		1096	chr1	27622955	27627531	+	0		intron (NM_005248, intron 1 of 12)	intron (NM_005248, intron 1 of 12)	997	NM_001042747	2268	Hs.1422	NM_005248	ENSG00000000938	FGR	SRC2|c-fgr|c-src2|p55-Fgr|p55c-fgr|p58-Fgr|p58c-fgr	FGR proto-oncogene, Src family tyrosine kinase	protein-coding
1097	UPN1097	chr1	27627919	27636041	chr1:27627919-27636041	2	1	4	0		0		1097	chr1	27627919	27636041	+	0		intron (NM_005248, intron 1 of 12)	intron (NM_005248, intron 1 of 12)	3236	NM_005248	2268	Hs.1422	NM_005248	ENSG00000000938	FGR	SRC2|c-fgr|c-src2|p55-Fgr|p55c-fgr|p58-Fgr|p58c-fgr	FGR proto-oncogene, Src family tyrosine kinase	protein-coding
1101	UPN1101	chr1	27658711	27663313	chr1:27658711-27663313	1	3	4	0		0		1101	chr1	27658711	27663313	+	0		intron (NR_151722, intron 1 of 1)	L2b|LINE|L2	1710	NR_151722	111216282	Hs.297628	NR_151722	ENSG00000233975	LINC02574	-	long intergenic non-protein coding RNA 2574	ncRNA
1103	UPN1103	chr1	27671674	27673338	chr1:27671674-27673338	1	2	1	0		0		1103	chr1	27671674	27673338	+	0		promoter-TSS (NM_022873)	promoter-TSS (NM_022873)	-293	NM_022872	2537	Hs.523847	NM_002038	ENSG00000126709	IFI6	6-16|FAM14C|G1P3|IFI-6-16|IFI616	interferon alpha inducible protein 6	protein-coding
1104	UPN1104	chr1	27724959	27725602	chr1:27724959-27725602	1	1	1	0		0		1104	chr1	27724959	27725602	+	0		promoter-TSS (NM_001143912)	promoter-TSS (NM_001143912)	-699	NM_001143912	199870	Hs.469359	NM_152660	ENSG00000009780	FAM76A	-	family with sequence similarity 76 member A	protein-coding
1107	UPN1107	chr1	27858348	27859660	chr1:27858348-27859660	1	1	1	0		0		1107	chr1	27858348	27859660	+	0		Intergenic	L2a|LINE|L2	-13539	NM_001039477	9473	Hs.10649	NM_004848	ENSG00000130775	THEMIS2	C1orf38|ICB-1|ICB1	thymocyte selection associated family member 2	protein-coding
1108	UPN1108	chr1	27861533	27865407	chr1:27861533-27865407	1	3	2	0		0		1108	chr1	27861533	27865407	+	0		Intergenic	Intergenic	-9073	NM_001039477	9473	Hs.10649	NM_004848	ENSG00000130775	THEMIS2	C1orf38|ICB-1|ICB1	thymocyte selection associated family member 2	protein-coding
1109	UPN1109	chr1	27868175	27870275	chr1:27868175-27870275	1	1	1	0		0		1109	chr1	27868175	27870275	+	0		Intergenic	Intergenic	-3318	NM_001039477	9473	Hs.10649	NM_004848	ENSG00000130775	THEMIS2	C1orf38|ICB-1|ICB1	thymocyte selection associated family member 2	protein-coding
1111	UPN1111	chr1	27872585	27873983	chr1:27872585-27873983	1	1	2	0		0		1111	chr1	27872585	27873983	+	0		intron (NM_001105556, intron 1 of 5)	L2b|LINE|L2	741	NM_001105556	9473	Hs.10649	NM_004848	ENSG00000130775	THEMIS2	C1orf38|ICB-1|ICB1	thymocyte selection associated family member 2	protein-coding
1116	UPN1116	chr1	27881849	27888440	chr1:27881849-27888440	1	2	1	0		0		1116	chr1	27881849	27888440	+	0		intron (NM_001105556, intron 4 of 5)	intron (NM_001105556, intron 4 of 5)	12601	NM_001105556	9473	Hs.10649	NM_004848	ENSG00000130775	THEMIS2	C1orf38|ICB-1|ICB1	thymocyte selection associated family member 2	protein-coding
1117	UPN1117	chr1	27888789	27890121	chr1:27888789-27890121	1	1	1	0		0		1117	chr1	27888789	27890121	+	0		Intergenic	Intergenic	16912	NM_001105556	9473	Hs.10649	NM_004848	ENSG00000130775	THEMIS2	C1orf38|ICB-1|ICB1	thymocyte selection associated family member 2	protein-coding
1119	UPN1119	chr1	27891817	27893375	chr1:27891817-27893375	2	1	1	0		0		1119	chr1	27891817	27893375	+	0		intron (NM_001355129, intron 8 of 8)	intron (NM_001355129, intron 8 of 8)	20053	NM_001105556	9473	Hs.10649	NM_004848	ENSG00000130775	THEMIS2	C1orf38|ICB-1|ICB1	thymocyte selection associated family member 2	protein-coding
1125	UPN1125	chr1	27959323	27961711	chr1:27959323-27961711	1	1	1	0		0		1125	chr1	27959323	27961711	+	0		intron (NM_018053, intron 1 of 2)	intron (NM_018053, intron 1 of 2)	1055	NM_018053	55113	Hs.55024	NM_018053	ENSG00000158156	XKR8	XRG8|hXkr8	XK related 8	protein-coding
1126	UPN1126	chr1	27970599	27971322	chr1:27970599-27971322	1	1	1	0		0		1126	chr1	27970599	27971322	+	0		3' UTR (NM_001282562, exon 17 of 17)	3' UTR (NM_001282562, exon 17 of 17)	11498	NM_018053	55113	Hs.55024	NM_018053	ENSG00000158156	XKR8	XRG8|hXkr8	XK related 8	protein-coding
1130	UPN1130	chr1	28110360	28113403	chr1:28110360-28113403	2	1	1	0		0		1130	chr1	28110360	28113403	+	0		Intergenic	AluJr4|SINE|Alu	-23244	NM_001282560	2140	Hs.185774	NM_001990	ENSG00000158161	EYA3	-	EYA transcriptional coactivator and phosphatase 3	protein-coding
1132	UPN1132	chr1	28122587	28124927	chr1:28122587-28124927	1	2	1	0		0		1132	chr1	28122587	28124927	+	0		Intergenic	Intergenic	-35120	NM_001282560	2140	Hs.185774	NM_001990	ENSG00000158161	EYA3	-	EYA transcriptional coactivator and phosphatase 3	protein-coding
1133	UPN1133	chr1	28125193	28125865	chr1:28125193-28125865	1	1	1	0		0		1133	chr1	28125193	28125865	+	0		Intergenic	Intergenic	-36892	NM_001282560	2140	Hs.185774	NM_001990	ENSG00000158161	EYA3	-	EYA transcriptional coactivator and phosphatase 3	protein-coding
1134	UPN1134	chr1	28127536	28129626	chr1:28127536-28129626	1	1	1	0		0		1134	chr1	28127536	28129626	+	0		Intergenic	Intergenic	-39944	NM_001282560	2140	Hs.185774	NM_001990	ENSG00000158161	EYA3	-	EYA transcriptional coactivator and phosphatase 3	protein-coding
1137	UPN1137	chr1	28135805	28136966	chr1:28135805-28136966	1	1	1	0		0		1137	chr1	28135805	28136966	+	0		Intergenic	Intergenic	40559	NM_000952	5724	Hs.77542	NM_000952	ENSG00000169403	PTAFR	PAFR	platelet activating factor receptor	protein-coding
1143	UPN1143	chr1	28159913	28161404	chr1:28159913-28161404	2	1	1	0		0		1143	chr1	28159913	28161404	+	0		intron (NM_001164722, intron 1 of 1)	intron (NM_001164722, intron 1 of 1)	16286	NM_000952	5724	Hs.77542	NM_000952	ENSG00000169403	PTAFR	PAFR	platelet activating factor receptor	protein-coding
1147	UPN1147	chr1	28172126	28174831	chr1:28172126-28174831	1	1	1	0		0		1147	chr1	28172126	28174831	+	0		intron (NM_001164723, intron 1 of 2)	AluJb|SINE|Alu	3466	NM_000952	5724	Hs.77542	NM_000952	ENSG00000169403	PTAFR	PAFR	platelet activating factor receptor	protein-coding
1153	UPN1153	chr1	28247510	28249418	chr1:28247510-28249418	1	1	1	0		0		1153	chr1	28247510	28249418	+	0		Intergenic	MIR3|SINE|MIR	-10988	NM_031459	83667	Hs.469543	NM_031459	ENSG00000130766	SESN2	HI95|SES2|SEST2	sestrin 2	protein-coding
1158	UPN1158	chr1	28329552	28330058	chr1:28329552-28330058	1	1	1	0		0		1158	chr1	28329552	28330058	+	0		intron (NM_017638, intron 1 of 2)	MIR3|SINE|MIR	803	NM_001127350	54797	Hs.479911	NM_017638	ENSG00000130772	MED18	SRB5|p28b	mediator complex subunit 18	protein-coding
1160	UPN1160	chr1	28437015	28438146	chr1:28437015-28438146	1	1	1	0		0		1160	chr1	28437015	28438146	+	0		promoter-TSS (NM_023923)	promoter-TSS (NM_023923)	-570	NM_023923	65979	Hs.225641	NM_023923	ENSG00000204138	PHACTR4	PPP1R124	phosphatase and actin regulator 4	protein-coding
1181	UPN1181	chr1	29120889	29125654	chr1:29120889-29125654	1	2	3	0		0		1181	chr1	29120889	29125654	+	0		promoter-TSS (NM_001171868)	promoter-TSS (NM_001171868)	638	NM_001003682	399474	Hs.712722	NM_001003682	ENSG00000253304	TMEM200B	TTMB	transmembrane protein 200B	protein-coding
1184	UPN1184	chr1	29202183	29202808	chr1:29202183-29202808	1	1	1	0		0		1184	chr1	29202183	29202808	+	0		intron (NR_146214, intron 5 of 10)	intron (NR_146214, intron 5 of 10)	-20370	NM_005626	6429	Hs.469970	NM_005626	ENSG00000116350	SRSF4	SFRS4|SRP75	serine and arginine rich splicing factor 4	protein-coding
1185	UPN1185	chr1	29236622	29237679	chr1:29236622-29237679	1	2	1	0		0		1185	chr1	29236622	29237679	+	0		intron (NM_005704, intron 1 of 30)	CpG	634	NM_133178	10076	Hs.19718	NM_005704	ENSG00000060656	PTPRU	FMI|PCP-2|PTP|PTP-J|PTP-PI|PTP-RO|PTPPSI|PTPRO|PTPU2|R-PTP-PSI|R-PTP-U|hPTP-J	protein tyrosine phosphatase, receptor type U	protein-coding
1186	UPN1186	chr1	29237998	29239121	chr1:29237998-29239121	1	1	1	0		0		1186	chr1	29237998	29239121	+	0		intron (NM_005704, intron 1 of 30)	CpG	2043	NM_133178	10076	Hs.19718	NM_005704	ENSG00000060656	PTPRU	FMI|PCP-2|PTP|PTP-J|PTP-PI|PTP-RO|PTPPSI|PTPRO|PTPU2|R-PTP-PSI|R-PTP-U|hPTP-J	protein tyrosine phosphatase, receptor type U	protein-coding
1194	UPN1194	chr1	30190383	30191193	chr1:30190383-30191193	1	1	1	0		0		1194	chr1	30190383	30191193	+	0		Intergenic	Intergenic	-153176	NR_110790	101929406	Hs.639413	NR_110790	ENSG00000233399	LINC01648	-	long intergenic non-protein coding RNA 1648	ncRNA
1195	UPN1195	chr1	30668686	30669608	chr1:30668686-30669608	1	1	1	0		0		1195	chr1	30668686	30669608	+	0		Intergenic	L2a|LINE|L2	-49625	NR_034182	100129196	Hs.659751	NR_034182	ENSG00000186056	MATN1-AS1	-	MATN1 antisense RNA 1	ncRNA
1197	UPN1197	chr1	30670521	30671579	chr1:30670521-30671579	1	1	1	0		0		1197	chr1	30670521	30671579	+	0		Intergenic	Intergenic	-47722	NR_034182	100129196	Hs.659751	NR_034182	ENSG00000186056	MATN1-AS1	-	MATN1 antisense RNA 1	ncRNA
1203	UPN1203	chr1	30694075	30699780	chr1:30694075-30699780	1	1	3	0		0		1203	chr1	30694075	30699780	+	0		Intergenic	Intergenic	-21845	NR_034182	100129196	Hs.659751	NR_034182	ENSG00000186056	MATN1-AS1	-	MATN1 antisense RNA 1	ncRNA
1209	UPN1209	chr1	30742837	30752917	chr1:30742837-30752917	2	3	1	0		0		1209	chr1	30742837	30752917	+	0		intron (NM_006762, intron 1 of 7)	intron (NM_006762, intron 1 of 7)	-8645	NR_039616	100616164		NR_039616	ENSG00000264773	MIR4420	mir-4420	microRNA 4420	ncRNA
1210	UPN1210	chr1	30753319	30759108	chr1:30753319-30759108	1	1	1	0		0		1210	chr1	30753319	30759108	+	0		intron (NM_006762, intron 1 of 7)	intron (NM_006762, intron 1 of 7)	1623	NM_006762	7805	Hs.371021	NM_006762	ENSG00000162511	LAPTM5	CLAST6	lysosomal protein transmembrane 5	protein-coding
1212	UPN1212	chr1	30782598	30784034	chr1:30782598-30784034	1	1	1	0		0		1212	chr1	30782598	30784034	+	0		Intergenic	Intergenic	-25480	NM_006762	7805	Hs.371021	NM_006762	ENSG00000162511	LAPTM5	CLAST6	lysosomal protein transmembrane 5	protein-coding
1214	UPN1214	chr1	30786482	30787030	chr1:30786482-30787030	1	1	1	0		0		1214	chr1	30786482	30787030	+	0		Intergenic	Intergenic	-28920	NM_006762	7805	Hs.371021	NM_006762	ENSG00000162511	LAPTM5	CLAST6	lysosomal protein transmembrane 5	protein-coding
1215	UPN1215	chr1	30787386	30790351	chr1:30787386-30790351	2	1	1	0		0		1215	chr1	30787386	30790351	+	0		Intergenic	L2c|LINE|L2	-31032	NM_006762	7805	Hs.371021	NM_006762	ENSG00000162511	LAPTM5	CLAST6	lysosomal protein transmembrane 5	protein-coding
1217	UPN1217	chr1	30797817	30799681	chr1:30797817-30799681	1	1	2	0		0		1217	chr1	30797817	30799681	+	0		Intergenic	MIR3|SINE|MIR	-25903	NR_146732	105378622	Hs.209284	NR_146732	ENSG00000223382	LINC01778	-	long intergenic non-protein coding RNA 1778	ncRNA
1220	UPN1220	chr1	30816025	30820657	chr1:30816025-30820657	1	1	3	0		0		1220	chr1	30816025	30820657	+	0		Intergenic	Intergenic	-6311	NR_146732	105378622	Hs.209284	NR_146732	ENSG00000223382	LINC01778	-	long intergenic non-protein coding RNA 1778	ncRNA
1221	UPN1221	chr1	30822995	30824775	chr1:30822995-30824775	1	1	1	0		0		1221	chr1	30822995	30824775	+	0		promoter-TSS (NR_146732)	promoter-TSS (NR_146732)	-767	NR_146732	105378622	Hs.209284	NR_146732	ENSG00000223382	LINC01778	-	long intergenic non-protein coding RNA 1778	ncRNA
1222	UPN1222	chr1	30847119	30848249	chr1:30847119-30848249	1	1	1	0		0		1222	chr1	30847119	30848249	+	0		Intergenic	Intergenic	23032	NR_146732	105378622	Hs.209284	NR_146732	ENSG00000223382	LINC01778	-	long intergenic non-protein coding RNA 1778	ncRNA
1223	UPN1223	chr1	30876315	30880756	chr1:30876315-30880756	1	1	2	0		0		1223	chr1	30876315	30880756	+	0		intron (NM_014654, intron 2 of 4)	intron (NM_014654, intron 2 of 4)	30098	NM_014654	9672	Hs.158287	NM_014654	ENSG00000162512	SDC3	SDCN|SYND3	syndecan 3	protein-coding
1225	UPN1225	chr1	30888086	30889503	chr1:30888086-30889503	1	1	1	0		0		1225	chr1	30888086	30889503	+	0		intron (NM_014654, intron 1 of 4)	intron (NM_014654, intron 1 of 4)	19839	NM_014654	9672	Hs.158287	NM_014654	ENSG00000162512	SDC3	SDCN|SYND3	syndecan 3	protein-coding
1227	UPN1227	chr1	30902019	30903549	chr1:30902019-30903549	1	1	1	0		0		1227	chr1	30902019	30903549	+	0		intron (NM_014654, intron 1 of 4)	intron (NM_014654, intron 1 of 4)	5849	NM_014654	9672	Hs.158287	NM_014654	ENSG00000162512	SDC3	SDCN|SYND3	syndecan 3	protein-coding
1228	UPN1228	chr1	30906971	30908196	chr1:30906971-30908196	1	1	1	0		0		1228	chr1	30906971	30908196	+	0		intron (NM_014654, intron 1 of 4)	intron (NM_014654, intron 1 of 4)	1050	NM_014654	9672	Hs.158287	NM_014654	ENSG00000162512	SDC3	SDCN|SYND3	syndecan 3	protein-coding
1229	UPN1229	chr1	30908916	30910046	chr1:30908916-30910046	1	1	1	0		0		1229	chr1	30908916	30910046	+	0		promoter-TSS (NM_014654)	promoter-TSS (NM_014654)	-848	NM_014654	9672	Hs.158287	NM_014654	ENSG00000162512	SDC3	SDCN|SYND3	syndecan 3	protein-coding
1231	UPN1231	chr1	30912089	30916056	chr1:30912089-30916056	1	1	1	0		0		1231	chr1	30912089	30916056	+	0		Intergenic	Arthur1A|DNA|hAT-Tip100	-5439	NM_014654	9672	Hs.158287	NM_014654	ENSG00000162512	SDC3	SDCN|SYND3	syndecan 3	protein-coding
1243	UPN1243	chr1	31297121	31298108	chr1:31297121-31298108	1	1	1	0		0		1243	chr1	31297121	31298108	+	0		promoter-TSS (NM_004814)	promoter-TSS (NM_004814)	632	NM_001282572	51538	Hs.524094	NM_016505	ENSG00000121766	ZCCHC17	HSPC251|PS1D|pNO40	zinc finger CCHC-type containing 17	protein-coding
1247	UPN1247	chr1	31372147	31374021	chr1:31372147-31374021	1	1	1	0		0		1247	chr1	31372147	31374021	+	0		5' UTR (NM_004102, exon 1 of 4)	5' UTR (NM_004102, exon 1 of 4)	204	NM_001320996	2170	Hs.576372	NM_004102	ENSG00000121769	FABP3	FABP11|H-FABP|M-FABP|MDGI|O-FABP	fatty acid binding protein 3	protein-coding
1248	UPN1248	chr1	31413306	31414091	chr1:31413306-31414091	1	1	1	0		0		1248	chr1	31413306	31414091	+	0		promoter-TSS (NM_018565)	promoter-TSS (NM_018565)	-115	NM_001199039	347735	Hs.270655	NM_018565	ENSG00000168528	SERINC2	FKSG84|PRO0899|TDE2|TDE2L	serine incorporator 2	protein-coding
1250	UPN1250	chr1	31482490	31482906	chr1:31482490-31482906	1	1	1	0		0		1250	chr1	31482490	31482906	+	0		Intergenic	Intergenic	-17387	NR_034112	149086	Hs.729905	NR_034112	ENSG00000260386	LINC01225	-	LINC01225 pseudogene	pseudo
1254	UPN1254	chr1	31572652	31573718	chr1:31572652-31573718	1	1	1	0		0		1254	chr1	31572652	31573718	+	0		Intergenic	Intergenic	-3300	NM_022164	64129	Hs.199368	NM_022164	ENSG00000142910	TINAGL1	ARG1|LCN7|LIECG3|TINAGRP	tubulointerstitial nephritis antigen like 1	protein-coding
1255	UPN1255	chr1	31574021	31576907	chr1:31574021-31576907	1	1	1	0		0		1255	chr1	31574021	31576907	+	0		Intergenic	Intergenic	-1021	NM_022164	64129	Hs.199368	NM_022164	ENSG00000142910	TINAGL1	ARG1|LCN7|LIECG3|TINAGRP	tubulointerstitial nephritis antigen like 1	protein-coding
1256	UPN1256	chr1	31576984	31578011	chr1:31576984-31578011	1	1	1	0		0		1256	chr1	31576984	31578011	+	0		promoter-TSS (NM_001204415)	promoter-TSS (NM_001204415)	-648	NM_001204415	64129	Hs.199368	NM_022164	ENSG00000142910	TINAGL1	ARG1|LCN7|LIECG3|TINAGRP	tubulointerstitial nephritis antigen like 1	protein-coding
1257	UPN1257	chr1	31579107	31587387	chr1:31579107-31587387	1	1	3	0		0		1257	chr1	31579107	31587387	+	0		intron (NM_001204415, intron 3 of 10)	intron (NM_001204415, intron 3 of 10)	5102	NM_001204415	64129	Hs.199368	NM_022164	ENSG00000142910	TINAGL1	ARG1|LCN7|LIECG3|TINAGRP	tubulointerstitial nephritis antigen like 1	protein-coding
1258	UPN1258	chr1	31587668	31589577	chr1:31587668-31589577	1	1	1	0		0		1258	chr1	31587668	31589577	+	0		TTS (NM_022164)	TTS (NM_022164)	10477	NM_001204415	64129	Hs.199368	NM_022164	ENSG00000142910	TINAGL1	ARG1|LCN7|LIECG3|TINAGRP	tubulointerstitial nephritis antigen like 1	protein-coding
1261	UPN1261	chr1	31643644	31644743	chr1:31643644-31644743	1	1	1	0		0		1261	chr1	31643644	31644743	+	0		intron (NM_012392, intron 1 of 4)	intron (NM_012392, intron 1 of 4)	424	NM_001359651	553115	Hs.470417	NM_012392	ENSG00000162517	PEF1	ABP32|PEF1A	penta-EF-hand domain containing 1	protein-coding
1262	UPN1262	chr1	31645487	31645998	chr1:31645487-31645998	1	1	1	0		0		1262	chr1	31645487	31645998	+	0		promoter-TSS (NR_033686)	promoter-TSS (NR_033686)	-505	NM_012392	553115	Hs.470417	NM_012392	ENSG00000162517	PEF1	ABP32|PEF1A	penta-EF-hand domain containing 1	protein-coding
1266	UPN1266	chr1	31700547	31702489	chr1:31700547-31702489	1	1	2	0		0		1266	chr1	31700547	31702489	+	0		intron (NM_001856, intron 2 of 70)	intron (NM_001856, intron 2 of 70)	2649	NM_001856	1307	Hs.368921	NM_001856	ENSG00000084636	COL16A1	447AA|FP1572	collagen type XVI alpha 1 chain	protein-coding
1267	UPN1267	chr1	31702948	31705406	chr1:31702948-31705406	1	1	1	0		0		1267	chr1	31702948	31705406	+	0		promoter-TSS (NM_001856)	promoter-TSS (NM_001856)	-10	NM_001856	1307	Hs.368921	NM_001856	ENSG00000084636	COL16A1	447AA|FP1572	collagen type XVI alpha 1 chain	protein-coding
1268	UPN1268	chr1	31712206	31715907	chr1:31712206-31715907	1	1	1	0		0		1268	chr1	31712206	31715907	+	0		Intergenic	AluSx1|SINE|Alu	-9889	NM_001856	1307	Hs.368921	NM_001856	ENSG00000084636	COL16A1	447AA|FP1572	collagen type XVI alpha 1 chain	protein-coding
1274	UPN1274	chr1	31889138	31890043	chr1:31889138-31890043	1	1	1	0		0		1274	chr1	31889138	31890043	+	0		Intergenic	MLT1A0|LTR|ERVL-MaLR	30068	NM_001195100	8073	Hs.470477	NM_003479	ENSG00000184007	PTP4A2	HH13|HH7-2|HU-PP-1|OV-1|PRL-2|PRL2|PTP4A|PTPCAAX2|ptp-IV1a|ptp-IV1b	protein tyrosine phosphatase type IVA, member 2	protein-coding
1282	UPN1282	chr1	31942051	31945691	chr1:31942051-31945691	1	1	1	0		0		1282	chr1	31942051	31945691	+	0		Intergenic	MIRb|SINE|MIR	-5484	NM_080391	8073	Hs.470477	NM_003479	ENSG00000184007	PTP4A2	HH13|HH7-2|HU-PP-1|OV-1|PRL-2|PRL2|PTP4A|PTPCAAX2|ptp-IV1a|ptp-IV1b	protein tyrosine phosphatase type IVA, member 2	protein-coding
1283	UPN1283	chr1	31952713	31953337	chr1:31952713-31953337	1	1	1	0		0		1283	chr1	31952713	31953337	+	0		Intergenic	Intergenic	-14638	NM_080391	8073	Hs.470477	NM_003479	ENSG00000184007	PTP4A2	HH13|HH7-2|HU-PP-1|OV-1|PRL-2|PRL2|PTP4A|PTPCAAX2|ptp-IV1a|ptp-IV1b	protein tyrosine phosphatase type IVA, member 2	protein-coding
1285	UPN1285	chr1	31954194	31957157	chr1:31954194-31957157	1	2	2	0		0		1285	chr1	31954194	31957157	+	0		Intergenic	AluSp|SINE|Alu	-17288	NM_080391	8073	Hs.470477	NM_003479	ENSG00000184007	PTP4A2	HH13|HH7-2|HU-PP-1|OV-1|PRL-2|PRL2|PTP4A|PTPCAAX2|ptp-IV1a|ptp-IV1b	protein tyrosine phosphatase type IVA, member 2	protein-coding
1294	UPN1294	chr1	32178856	32179742	chr1:32178856-32179742	1	1	1	0		0		1294	chr1	32178856	32179742	+	0		promoter-TSS (NM_175852)	promoter-TSS (NM_175852)	-445	NM_175852	200081	Hs.17987	NM_175852	ENSG00000084652	TXLNA	IL14|TXLN	taxilin alpha	protein-coding
1295	UPN1295	chr1	32199459	32202282	chr1:32199459-32202282	2	2	2	0		0		1295	chr1	32199459	32202282	+	0		intron (NM_001301011, intron 1 of 4)	intron (NM_001301011, intron 1 of 4)	484	NM_024296	79140	Hs.534482	NM_024296	ENSG00000160050	CCDC28B	-	coiled-coil domain containing 28B	protein-coding
1301	UPN1301	chr1	32239847	32241864	chr1:32239847-32241864	1	1	2	0		0		1301	chr1	32239847	32241864	+	0		intron (NR_026850, intron 1 of 6)	CpG	855	NR_026850	339483	Hs.471067	NR_026850		MTMR9LP	MTMR9L	myotubularin related protein 9-like, pseudogene	pseudo
1303	UPN1303	chr1	32246610	32249063	chr1:32246610-32249063	1	1	1	0		0		1303	chr1	32246610	32249063	+	0		intron (NM_032648, intron 1 of 1)	intron (NM_032648, intron 1 of 1)	619	NM_032648	84734	Hs.18449	NM_032648	ENSG00000183615	FAM167B	C1orf90	family with sequence similarity 167 member B	protein-coding
1304	UPN1304	chr1	32249654	32253748	chr1:32249654-32253748	1	2	1	0		0		1304	chr1	32249654	32253748	+	0		intron (NM_001330468, intron 1 of 11)	MIR3|SINE|MIR	462	NM_001330468	3932	Hs.470627	NM_005356	ENSG00000182866	LCK	IMD22|LSK|YT16|p56lck|pp58lck	LCK proto-oncogene, Src family tyrosine kinase	protein-coding
1309	UPN1309	chr1	32334516	32335553	chr1:32334516-32335553	1	1	1	0		0		1309	chr1	32334516	32335553	+	0		non-coding (NR_052852, exon 2 of 2)	non-coding (NR_052852, exon 2 of 2)	1205	NM_023009	65108	Hs.75061	NM_023009	ENSG00000175130	MARCKSL1	F52|MACMARCKS|MLP|MLP1|MRP	MARCKS like 1	protein-coding
1311	UPN1311	chr1	32336514	32337454	chr1:32336514-32337454	2	1	1	0		0		1311	chr1	32336514	32337454	+	0		promoter-TSS (NR_052852)	promoter-TSS (NR_052852)	-745	NR_052852	65108	Hs.75061	NM_023009	ENSG00000175130	MARCKSL1	F52|MACMARCKS|MLP|MLP1|MRP	MARCKS like 1	protein-coding
1314	UPN1314	chr1	32350754	32354484	chr1:32350754-32354484	1	1	1	0		0		1314	chr1	32350754	32354484	+	0		Intergenic	AluJb|SINE|Alu	9624	NM_001167676	100128071	Hs.512763	NM_001167676	ENSG00000225828	FAM229A	-	family with sequence similarity 229 member A	protein-coding
1323	UPN1323	chr1	32701468	32704468	chr1:32701468-32704468	2	1	3	0		0		1323	chr1	32701468	32704468	+	0		promoter-TSS (NM_030786)	promoter-TSS (NM_030786)	-208	NM_001161708	81493	Hs.712631	NM_030786	ENSG00000162520	SYNC	SYNC1|SYNCOILIN	syncoilin, intermediate filament protein	protein-coding
1330	UPN1330	chr1	32816300	32817367	chr1:32816300-32817367	1	1	1	0		0		1330	chr1	32816300	32817367	+	0		promoter-TSS (NM_001256121)	promoter-TSS (NM_001256121)	-609	NM_001256121	64766	Hs.440880	NM_022753	ENSG00000116497	S100PBP	S100PBPR	S100P binding protein	protein-coding
1336	UPN1336	chr1	32948220	32950022	chr1:32948220-32950022	2	1	2	0		0		1336	chr1	32948220	32950022	+	0		intron (NM_153341, intron 2 of 8)	intron (NM_153341, intron 2 of 8)	15692	NM_001300826	127544	Hs.591504	NM_153341	ENSG00000116514	RNF19B	IBRDC3|NKLAM	ring finger protein 19B	protein-coding
1338	UPN1338	chr1	32962175	32963395	chr1:32962175-32963395	1	1	1	0		0		1338	chr1	32962175	32963395	+	0		intron (NM_001127361, intron 1 of 8)	intron (NM_001127361, intron 1 of 8)	2028	NM_001300826	127544	Hs.591504	NM_153341	ENSG00000116514	RNF19B	IBRDC3|NKLAM	ring finger protein 19B	protein-coding
1340	UPN1340	chr1	32979945	32983545	chr1:32979945-32983545	1	3	1	0		0		1340	chr1	32979945	32983545	+	0		Intergenic	Intergenic	-16932	NM_001127361	127544	Hs.591504	NM_153341	ENSG00000116514	RNF19B	IBRDC3|NKLAM	ring finger protein 19B	protein-coding
1343	UPN1343	chr1	32988149	32990192	chr1:32988149-32990192	1	1	1	0		0		1343	chr1	32988149	32990192	+	0		Intergenic	Intergenic	-24357	NM_001127361	127544	Hs.591504	NM_153341	ENSG00000116514	RNF19B	IBRDC3|NKLAM	ring finger protein 19B	protein-coding
1344	UPN1344	chr1	32990704	32994390	chr1:32990704-32994390	1	1	1	0		0		1344	chr1	32990704	32994390	+	0		Intergenic	Intergenic	-27734	NM_001127361	127544	Hs.591504	NM_153341	ENSG00000116514	RNF19B	IBRDC3|NKLAM	ring finger protein 19B	protein-coding
1345	UPN1345	chr1	32996431	32999500	chr1:32996431-32999500	1	1	1	0		0		1345	chr1	32996431	32999500	+	0		Intergenic	L2b|LINE|L2	-33152	NM_001127361	127544	Hs.591504	NM_153341	ENSG00000116514	RNF19B	IBRDC3|NKLAM	ring finger protein 19B	protein-coding
1349	UPN1349	chr1	33011416	33011862	chr1:33011416-33011862	1	1	1	0		0		1349	chr1	33011416	33011862	+	0		3' UTR (NM_001625, exon 6 of 6)	3' UTR (NM_001625, exon 6 of 6)	25272	NM_001319141	204	Hs.470907	NM_001625	ENSG00000004455	AK2	ADK2	adenylate kinase 2	protein-coding
1351	UPN1351	chr1	33049935	33050898	chr1:33049935-33050898	1	1	1	0		0		1351	chr1	33049935	33050898	+	0		Intergenic	MER44B|DNA|TcMar-Tigger	-13505	NM_001199199	204	Hs.470907	NM_001625	ENSG00000004455	AK2	ADK2	adenylate kinase 2	protein-coding
1361	UPN1361	chr1	33327107	33329321	chr1:33327107-33329321	2	1	1	0		0		1361	chr1	33327107	33329321	+	0		intron (NM_198040, intron 13 of 13)	intron (NM_198040, intron 13 of 13)	4278	NR_037400	100500853		NR_037400	ENSG00000284154	MIR3605	mir-3605	microRNA 3605	ncRNA
1363	UPN1363	chr1	33330852	33343198	chr1:33330852-33343198	4	3	1	0		0		1363	chr1	33330852	33343198	+	0		intron (NM_198040, intron 8 of 13)	intron (NM_198040, intron 8 of 13)	-4533	NR_037400	100500853		NR_037400	ENSG00000284154	MIR3605	mir-3605	microRNA 3605	ncRNA
1365	UPN1365	chr1	33344829	33348990	chr1:33344829-33348990	1	2	1	0		0		1365	chr1	33344829	33348990	+	0		intron (NM_198040, intron 8 of 13)	intron (NM_198040, intron 8 of 13)	2989	NM_004427	1912	Hs.524271	NM_004427	ENSG00000134686	PHC2	EDR2|HPH2|PH2	polyhomeotic homolog 2	protein-coding
1366	UPN1366	chr1	33350131	33350978	chr1:33350131-33350978	1	1	1	0		0		1366	chr1	33350131	33350978	+	0		promoter-TSS (NM_004427)	promoter-TSS (NM_004427)	202	NR_125978	101929464	Hs.568627	NR_125978	ENSG00000233246	LOC101929464	-	uncharacterized LOC101929464	ncRNA
1367	UPN1367	chr1	33364595	33365806	chr1:33364595-33365806	1	1	1	0		0		1367	chr1	33364595	33365806	+	0		intron (NM_198040, intron 6 of 13)	MIRb|SINE|MIR	10393	NM_198040	1912	Hs.524271	NM_004427	ENSG00000134686	PHC2	EDR2|HPH2|PH2	polyhomeotic homolog 2	protein-coding
1372	UPN1372	chr1	33430116	33430682	chr1:33430116-33430682	1	1	1	0		0		1372	chr1	33430116	33430682	+	0		Intergenic	Intergenic	-42232	NM_145238	7579	Hs.442705	NM_145238	ENSG00000121903	ZSCAN20	KOX29|ZFP-31|ZNF31|ZNF360	zinc finger and SCAN domain containing 20	protein-coding
1376	UPN1376	chr1	33459495	33461962	chr1:33459495-33461962	1	1	1	0		0		1376	chr1	33459495	33461962	+	0		Intergenic	Intergenic	-11903	NM_145238	7579	Hs.442705	NM_145238	ENSG00000121903	ZSCAN20	KOX29|ZFP-31|ZNF31|ZNF360	zinc finger and SCAN domain containing 20	protein-coding
1385	UPN1385	chr1	35447453	35451135	chr1:35447453-35451135	2	1	2	0		0		1385	chr1	35447453	35451135	+	0		intron (NM_024874, intron 15 of 20)	intron (NM_024874, intron 15 of 20)	-83217	NR_046659	100861513	Hs.585397	NR_046659	ENSG00000227409	ZMYM4-AS1	-	ZMYM4 antisense RNA 1	ncRNA
1389	UPN1389	chr1	35538890	35540792	chr1:35538890-35540792	1	1	1	0		0		1389	chr1	35538890	35540792	+	0		intron (NM_024874, intron 2 of 20)	intron (NM_024874, intron 2 of 20)	17595	NM_024874	79932	Hs.456507	NM_024874	ENSG00000142687	KIAA0319L	AAVR|AAVRL	KIAA0319 like	protein-coding
1395	UPN1395	chr1	35806366	35807224	chr1:35806366-35807224	1	1	1	0		0		1395	chr1	35806366	35807224	+	0		promoter-TSS (NR_146062)	promoter-TSS (NR_146062)	-829	NR_146062	192670	Hs.744858	NM_017629	ENSG00000134698	AGO4	EIF2C4	argonaute 4, RISC catalytic component	protein-coding
1397	UPN1397	chr1	35808813	35810520	chr1:35808813-35810520	2	1	1	0		0		1397	chr1	35808813	35810520	+	0		intron (NM_017629, intron 1 of 17)	intron (NM_017629, intron 1 of 17)	1439	NM_017629	192670	Hs.744858	NM_017629	ENSG00000134698	AGO4	EIF2C4	argonaute 4, RISC catalytic component	protein-coding
1407	UPN1407	chr1	36134648	36137737	chr1:36134648-36137737	1	1	1	0		0		1407	chr1	36134648	36137737	+	0		TTS (NM_001270894)	TTS (NM_001270894)	-11108	NM_005202	1296	Hs.353001	NM_005202	ENSG00000171812	COL8A2	FECD|FECD1|PPCD|PPCD2	collagen type VIII alpha 2 chain	protein-coding
1410	UPN1410	chr1	36149709	36152311	chr1:36149709-36152311	1	1	1	0		0		1410	chr1	36149709	36152311	+	0		intron (NM_001270895, intron 1 of 4)	intron (NM_001270895, intron 1 of 4)	-1496	NM_014408	27095	Hs.523131	NM_014408	ENSG00000054116	TRAPPC3	BET3	trafficking protein particle complex 3	protein-coding
1411	UPN1411	chr1	36152767	36153769	chr1:36152767-36153769	1	1	1	0		0		1411	chr1	36152767	36153769	+	0		intron (NM_001270895, intron 1 of 4)	intron (NM_001270895, intron 1 of 4)	-2697	NM_001286366	55700	Hs.356096	NM_018067	ENSG00000116871	MAP7D1	PARCC1|RPRC1	MAP7 domain containing 1	protein-coding
1412	UPN1412	chr1	36154277	36155847	chr1:36154277-36155847	1	1	1	0		0		1412	chr1	36154277	36155847	+	0		promoter-TSS (NM_001286365)	promoter-TSS (NM_001286365)	-903	NM_001286366	55700	Hs.356096	NM_018067	ENSG00000116871	MAP7D1	PARCC1|RPRC1	MAP7 domain containing 1	protein-coding
1413	UPN1413	chr1	36159344	36163255	chr1:36159344-36163255	1	1	1	0		0		1413	chr1	36159344	36163255	+	0		intron (NM_018067, intron 1 of 16)	intron (NM_018067, intron 1 of 16)	-5246	NM_001270895	27095	Hs.523131	NM_014408	ENSG00000054116	TRAPPC3	BET3	trafficking protein particle complex 3	protein-coding
1417	UPN1417	chr1	36187735	36188315	chr1:36187735-36188315	1	1	1	0		0		1417	chr1	36187735	36188315	+	0		Intergenic	Intergenic	-31972	NM_001270895	27095	Hs.523131	NM_014408	ENSG00000054116	TRAPPC3	BET3	trafficking protein particle complex 3	protein-coding
1418	UPN1418	chr1	36203214	36204755	chr1:36203214-36204755	1	1	1	0		0		1418	chr1	36203214	36204755	+	0		Intergenic	Intergenic	-20428	NM_001321471	9967	Hs.744057	NM_005119	ENSG00000054118	THRAP3	BCLAF2|TRAP150	thyroid hormone receptor associated protein 3	protein-coding
1423	UPN1423	chr1	36320794	36324551	chr1:36320794-36324551	1	2	1	0		0		1423	chr1	36320794	36324551	+	0		non-coding (NR_130899, exon 2 of 2)	non-coding (NR_130899, exon 2 of 2)	976	NR_130899	55194	Hs.87016	NM_018166	ENSG00000142694	EVA1B	C1orf78|FAM176B	eva-1 homolog B	protein-coding
1424	UPN1424	chr1	36348606	36351614	chr1:36348606-36351614	1	2	1	0		0		1424	chr1	36348606	36351614	+	0		intron (NM_032017, intron 7 of 11)	intron (NM_032017, intron 7 of 11)	-25956	NM_018166	55194	Hs.87016	NM_018166	ENSG00000142694	EVA1B	C1orf78|FAM176B	eva-1 homolog B	protein-coding
1427	UPN1427	chr1	36365272	36367890	chr1:36365272-36367890	2	2	1	0		0		1427	chr1	36365272	36367890	+	0		intron (NM_001282546, intron 1 of 10)	intron (NM_001282546, intron 1 of 10)	19346	NM_032017	83931	Hs.471768	NM_032017	ENSG00000196182	STK40	SHIK|SgK495	serine/threonine kinase 40	protein-coding
1429	UPN1429	chr1	36369702	36370852	chr1:36369702-36370852	1	1	1	0		0		1429	chr1	36369702	36370852	+	0		intron (NM_032017, intron 1 of 11)	intron (NM_032017, intron 1 of 11)	15650	NM_032017	83931	Hs.471768	NM_032017	ENSG00000196182	STK40	SHIK|SgK495	serine/threonine kinase 40	protein-coding
1430	UPN1430	chr1	36371968	36376812	chr1:36371968-36376812	1	2	1	0		0		1430	chr1	36371968	36376812	+	0		intron (NM_032017, intron 1 of 11)	intron (NM_032017, intron 1 of 11)	11537	NM_032017	83931	Hs.471768	NM_032017	ENSG00000196182	STK40	SHIK|SgK495	serine/threonine kinase 40	protein-coding
1433	UPN1433	chr1	36386303	36390080	chr1:36386303-36390080	1	2	1	0		0		1433	chr1	36386303	36390080	+	0		Intergenic	MIR|SINE|MIR	-2264	NM_001282546	83931	Hs.471768	NM_032017	ENSG00000196182	STK40	SHIK|SgK495	serine/threonine kinase 40	protein-coding
1434	UPN1434	chr1	36397023	36398544	chr1:36397023-36398544	1	2	1	0		0		1434	chr1	36397023	36398544	+	0		5' UTR (NM_032881, exon 1 of 2)	5' UTR (NM_032881, exon 1 of 2)	176	NM_032881	84967	Hs.603131	NM_032881	ENSG00000181817	LSM10	MST074|MSTP074	LSM10, U7 small nuclear RNA associated	protein-coding
1435	UPN1435	chr1	36400599	36402053	chr1:36400599-36402053	1	1	1	0		0		1435	chr1	36400599	36402053	+	0		Intergenic	LTR2752|LTR|ERV1	-3367	NM_032881	84967	Hs.603131	NM_032881	ENSG00000181817	LSM10	MST074|MSTP074	LSM10, U7 small nuclear RNA associated	protein-coding
1437	UPN1437	chr1	36450049	36451239	chr1:36450049-36451239	2	1	1	0		0		1437	chr1	36450049	36451239	+	0		promoter-TSS (NM_145047)	promoter-TSS (NM_145047)	-159	NM_145047	127700	Hs.202207	NM_145047	ENSG00000116885	OSCP1	C1orf102|NOR1	organic solute carrier partner 1	protein-coding
1438	UPN1438	chr1	36463487	36464872	chr1:36463487-36464872	1	2	1	0		0		1438	chr1	36463487	36464872	+	0		exon (NM_031280, exon 1 of 8)	exon (NM_031280, exon 1 of 8)	260	NM_031280	64960	Hs.352839	NM_031280	ENSG00000116898	MRPS15	DC37|MPR-S15|RPMS15|S15mt	mitochondrial ribosomal protein S15	protein-coding
1440	UPN1440	chr1	36485518	36486235	chr1:36485518-36486235	1	1	1	0		0		1440	chr1	36485518	36486235	+	0		Intergenic	L2b|LINE|L2	-2562	NM_172313	1441	Hs.524517	NM_000760	ENSG00000119535	CSF3R	CD114|GCSFR|SCN7	colony stimulating factor 3 receptor	protein-coding
1443	UPN1443	chr1	37471290	37474369	chr1:37471290-37474369	1	1	1	0		0		1443	chr1	37471290	37474369	+	0		intron (NR_038842, intron 1 of 2)	L1ME3D|LINE|L1	1614	NR_038842	728431	Hs.380738	NR_038842	ENSG00000233621	LINC01137	-	long intergenic non-protein coding RNA 1137	ncRNA
1444	UPN1444	chr1	37474796	37481928	chr1:37474796-37481928	1	2	1	0		0		1444	chr1	37474796	37481928	+	0		intron (NM_001323550, intron 2 of 5)	intron (NM_001323550, intron 2 of 5)	-1868	NR_106790	102465438		NR_106790	ENSG00000283724	MIR6732	hsa-mir-6732	microRNA 6732	ncRNA
1445	UPN1445	chr1	37485021	37487648	chr1:37485021-37487648	2	1	1	0		0		1445	chr1	37485021	37487648	+	0		Intergenic	Intergenic	6104	NR_106790	102465438		NR_106790	ENSG00000283724	MIR6732	hsa-mir-6732	microRNA 6732	ncRNA
1449	UPN1449	chr1	37690179	37692934	chr1:37690179-37692934	2	2	1	0		0		1449	chr1	37690179	37692934	+	0		promoter-TSS (NM_001350770)	promoter-TSS (NM_001350770)	718	NM_001350762	54955	Hs.272673	NM_017850	ENSG00000116922	C1orf109	-	chromosome 1 open reading frame 109	protein-coding
1450	UPN1450	chr1	37807046	37809556	chr1:37807046-37809556	1	2	1	0		0		1450	chr1	37807046	37809556	+	0		promoter-TSS (NM_024640)	promoter-TSS (NM_024640)	-108	NM_024640	79693	Hs.301564	NM_024640	ENSG00000196449	YRDC	DRIP3|IRIP|SUA5	yrdC N6-threonylcarbamoyltransferase domain containing	protein-coding
1456	UPN1456	chr1	37930817	37931703	chr1:37930817-37931703	1	1	1	0		0		1456	chr1	37930817	37931703	+	0		intron (NM_001350228, intron 3 of 20)	intron (NM_001350228, intron 3 of 20)	531	NM_001297434	3633	Hs.449942	NM_005540	ENSG00000204084	INPP5B	5PTase	inositol polyphosphate-5-phosphatase B	protein-coding
1457	UPN1457	chr1	37945555	37947604	chr1:37945555-37947604	1	1	1	0		0		1457	chr1	37945555	37947604	+	0		intron (NM_005540, intron 1 of 23)	intron (NM_005540, intron 1 of 23)	478	NM_005540	3633	Hs.449942	NM_005540	ENSG00000204084	INPP5B	5PTase	inositol polyphosphate-5-phosphatase B	protein-coding
1458	UPN1458	chr1	37995039	38002109	chr1:37995039-38002109	1	1	1	0		0		1458	chr1	37995039	38002109	+	0		intron (NM_001243878, intron 2 of 4)	intron (NM_001243878, intron 2 of 4)	6941	NM_004468	2275	Hs.57687	NM_004468	ENSG00000183386	FHL3	SLIM2	four and a half LIM domains 3	protein-coding
1459	UPN1459	chr1	38002938	38004987	chr1:38002938-38004987	1	1	1	0		0		1459	chr1	38002938	38004987	+	0		intron (NM_004468, intron 1 of 5)	intron (NM_004468, intron 1 of 5)	1553	NM_004468	2275	Hs.57687	NM_004468	ENSG00000183386	FHL3	SLIM2	four and a half LIM domains 3	protein-coding
1460	UPN1460	chr1	38005829	38006375	chr1:38005829-38006375	1	1	1	0		0		1460	chr1	38005829	38006375	+	0		promoter-TSS (NM_004468)	promoter-TSS (NM_004468)	-587	NM_001243878	2275	Hs.57687	NM_004468	ENSG00000183386	FHL3	SLIM2	four and a half LIM domains 3	protein-coding
1468	UPN1468	chr1	39025583	39026002	chr1:39025583-39026002	1	1	1	0		0		1468	chr1	39025583	39026002	+	0		promoter-TSS (NM_001184979)	promoter-TSS (NM_001184979)	-503	NM_001184979	4725	Hs.632385	NM_004552	ENSG00000168653	NDUFS5	CI-15k|CI15K	NADH:ubiquinone oxidoreductase subunit S5	protein-coding
1470	UPN1470	chr1	39046664	39047411	chr1:39046664-39047411	1	1	1	0		0		1470	chr1	39046664	39047411	+	0		Intergenic	Intergenic	20742	NM_004552	4725	Hs.632385	NM_004552	ENSG00000168653	NDUFS5	CI-15k|CI15K	NADH:ubiquinone oxidoreductase subunit S5	protein-coding
1476	UPN1476	chr1	39102563	39105116	chr1:39102563-39105116	1	1	1	0		0		1476	chr1	39102563	39105116	+	0		intron (NM_012090, intron 1 of 92)	intron (NM_012090, intron 1 of 92)	19672	NM_012090	23499	Hs.472475	NM_012090	ENSG00000127603	MACF1	ABP620|ACF7|MACF|OFC4	microtubule-actin crosslinking factor 1	protein-coding
1478	UPN1478	chr1	39106954	39109288	chr1:39106954-39109288	1	1	1	0		0		1478	chr1	39106954	39109288	+	0		intron (NM_012090, intron 1 of 92)	intron (NM_012090, intron 1 of 92)	23954	NM_012090	23499	Hs.472475	NM_012090	ENSG00000127603	MACF1	ABP620|ACF7|MACF|OFC4	microtubule-actin crosslinking factor 1	protein-coding
1479	UPN1479	chr1	39110262	39111383	chr1:39110262-39111383	1	1	1	0		0		1479	chr1	39110262	39111383	+	0		intron (NM_012090, intron 1 of 92)	intron (NM_012090, intron 1 of 92)	26655	NM_012090	23499	Hs.472475	NM_012090	ENSG00000127603	MACF1	ABP620|ACF7|MACF|OFC4	microtubule-actin crosslinking factor 1	protein-coding
1482	UPN1482	chr1	39130191	39131787	chr1:39130191-39131787	1	1	1	0		0		1482	chr1	39130191	39131787	+	0		intron (NM_012090, intron 1 of 92)	AluSq2|SINE|Alu	46822	NM_012090	23499	Hs.472475	NM_012090	ENSG00000127603	MACF1	ABP620|ACF7|MACF|OFC4	microtubule-actin crosslinking factor 1	protein-coding
1483	UPN1483	chr1	39132067	39133488	chr1:39132067-39133488	1	2	1	0		0		1483	chr1	39132067	39133488	+	0		intron (NM_012090, intron 1 of 92)	intron (NM_012090, intron 1 of 92)	48610	NM_012090	23499	Hs.472475	NM_012090	ENSG00000127603	MACF1	ABP620|ACF7|MACF|OFC4	microtubule-actin crosslinking factor 1	protein-coding
1490	UPN1490	chr1	39177822	39179131	chr1:39177822-39179131	1	1	1	0		0		1490	chr1	39177822	39179131	+	0		intron (NM_012090, intron 1 of 92)	intron (NM_012090, intron 1 of 92)	94309	NM_012090	23499	Hs.472475	NM_012090	ENSG00000127603	MACF1	ABP620|ACF7|MACF|OFC4	microtubule-actin crosslinking factor 1	protein-coding
1492	UPN1492	chr1	39183957	39185011	chr1:39183957-39185011	1	1	1	0		0		1492	chr1	39183957	39185011	+	0		intron (NM_012090, intron 1 of 92)	intron (NM_012090, intron 1 of 92)	100317	NM_012090	23499	Hs.472475	NM_012090	ENSG00000127603	MACF1	ABP620|ACF7|MACF|OFC4	microtubule-actin crosslinking factor 1	protein-coding
1495	UPN1495	chr1	39191409	39192026	chr1:39191409-39192026	1	1	1	0		0		1495	chr1	39191409	39192026	+	0		intron (NM_012090, intron 1 of 92)	intron (NM_012090, intron 1 of 92)	107550	NM_012090	23499	Hs.472475	NM_012090	ENSG00000127603	MACF1	ABP620|ACF7|MACF|OFC4	microtubule-actin crosslinking factor 1	protein-coding
1496	UPN1496	chr1	39192399	39197110	chr1:39192399-39197110	1	2	1	0		0		1496	chr1	39192399	39197110	+	0		intron (NM_012090, intron 1 of 92)	AluJr4|SINE|Alu	110587	NM_012090	23499	Hs.472475	NM_012090	ENSG00000127603	MACF1	ABP620|ACF7|MACF|OFC4	microtubule-actin crosslinking factor 1	protein-coding
1497	UPN1497	chr1	39197442	39198144	chr1:39197442-39198144	1	1	1	0		0		1497	chr1	39197442	39198144	+	0		intron (NM_012090, intron 1 of 92)	AluJr|SINE|Alu	113626	NM_012090	23499	Hs.472475	NM_012090	ENSG00000127603	MACF1	ABP620|ACF7|MACF|OFC4	microtubule-actin crosslinking factor 1	protein-coding
1498	UPN1498	chr1	39203225	39206047	chr1:39203225-39206047	1	1	1	0		0		1498	chr1	39203225	39206047	+	0		intron (NM_012090, intron 1 of 92)	intron (NM_012090, intron 1 of 92)	120469	NM_012090	23499	Hs.472475	NM_012090	ENSG00000127603	MACF1	ABP620|ACF7|MACF|OFC4	microtubule-actin crosslinking factor 1	protein-coding
1500	UPN1500	chr1	39213442	39217099	chr1:39213442-39217099	2	2	1	0		0		1500	chr1	39213442	39217099	+	0		intron (NM_012090, intron 1 of 92)	intron (NM_012090, intron 1 of 92)	131103	NM_012090	23499	Hs.472475	NM_012090	ENSG00000127603	MACF1	ABP620|ACF7|MACF|OFC4	microtubule-actin crosslinking factor 1	protein-coding
1501	UPN1501	chr1	39230699	39231366	chr1:39230699-39231366	1	1	1	0		0		1501	chr1	39230699	39231366	+	0		intron (NM_012090, intron 1 of 92)	intron (NM_012090, intron 1 of 92)	146865	NM_012090	23499	Hs.472475	NM_012090	ENSG00000127603	MACF1	ABP620|ACF7|MACF|OFC4	microtubule-actin crosslinking factor 1	protein-coding
1504	UPN1504	chr1	39268044	39270691	chr1:39268044-39270691	1	1	1	0		0		1504	chr1	39268044	39270691	+	0		intron (NM_012090, intron 5 of 92)	intron (NM_012090, intron 5 of 92)	-140137	NM_015038	643314	Hs.658760	NM_015038	ENSG00000127603	KIAA0754	-	KIAA0754	protein-coding
1509	UPN1509	chr1	39391299	39393003	chr1:39391299-39393003	1	1	1	0		0		1509	chr1	39391299	39393003	+	0		intron (NM_012090, intron 52 of 92)	intron (NM_012090, intron 52 of 92)	-17353	NM_015038	643314	Hs.658760	NM_015038	ENSG00000127603	KIAA0754	-	KIAA0754	protein-coding
1510	UPN1510	chr1	39393322	39397220	chr1:39393322-39397220	2	2	3	0		0		1510	chr1	39393322	39397220	+	0		intron (NM_012090, intron 52 of 92)	MER20|DNA|hAT-Charlie	-14233	NM_015038	643314	Hs.658760	NM_015038	ENSG00000127603	KIAA0754	-	KIAA0754	protein-coding
1511	UPN1511	chr1	39397550	39399357	chr1:39397550-39399357	1	1	1	0		0		1511	chr1	39397550	39399357	+	0		intron (NM_012090, intron 52 of 92)	MER20|DNA|hAT-Charlie	-11051	NM_015038	643314	Hs.658760	NM_015038	ENSG00000127603	KIAA0754	-	KIAA0754	protein-coding
1512	UPN1512	chr1	39399630	39400107	chr1:39399630-39400107	1	1	1	0		0		1512	chr1	39399630	39400107	+	0		intron (NM_012090, intron 52 of 92)	intron (NM_012090, intron 52 of 92)	-9636	NM_015038	643314	Hs.658760	NM_015038	ENSG00000127603	KIAA0754	-	KIAA0754	protein-coding
1513	UPN1513	chr1	39407181	39408763	chr1:39407181-39408763	1	1	1	0		0		1513	chr1	39407181	39408763	+	0		intron (NM_012090, intron 52 of 92)	intron (NM_012090, intron 52 of 92)	-1532	NM_015038	643314	Hs.658760	NM_015038	ENSG00000127603	KIAA0754	-	KIAA0754	protein-coding
1519	UPN1519	chr1	39574473	39576213	chr1:39574473-39576213	1	1	1	0		0		1519	chr1	39574473	39576213	+	0		intron (NM_001135653, intron 1 of 15)	intron (NM_001135653, intron 1 of 15)	1506	NM_003819	8761	Hs.169900	NM_003819	ENSG00000090621	PABPC4	APP-1|APP1|PABP4|iPABP	poly(A) binding protein cytoplasmic 4	protein-coding
1521	UPN1521	chr1	39625835	39626976	chr1:39625835-39626976	1	1	1	0		0		1521	chr1	39625835	39626976	+	0		3' UTR (NM_014571, exon 5 of 5)	3' UTR (NM_014571, exon 5 of 5)	13271	NM_014571	26508	Hs.472566	NM_014571	ENSG00000163909	HEYL	HESR3|HEY3|HRT3|bHLHb33	hes related family bHLH transcription factor with YRPW motif-like	protein-coding
1533	UPN1533	chr1	39933894	39936037	chr1:39933894-39936037	1	1	2	0		0		1533	chr1	39933894	39936037	+	0		Intergenic	Intergenic	-20147	NM_001287808	84879	Hs.655177	NM_032793	ENSG00000168389	MFSD2A	MCPH15|MFSD2|NLS1	major facilitator superfamily domain containing 2A	protein-coding
1537	UPN1537	chr1	39959805	39961167	chr1:39959805-39961167	1	1	1	0		0		1537	chr1	39959805	39961167	+	0		intron (NM_001349821, intron 3 of 13)	intron (NM_001349821, intron 3 of 13)	5374	NM_001136493	84879	Hs.655177	NM_032793	ENSG00000168389	MFSD2A	MCPH15|MFSD2|NLS1	major facilitator superfamily domain containing 2A	protein-coding
1544	UPN1544	chr1	40047113	40048016	chr1:40047113-40048016	1	1	1	0		0		1544	chr1	40047113	40048016	+	0		intron (NM_001350484, intron 2 of 13)	intron (NM_001350484, intron 2 of 13)	6713	NM_001350481	10487	Hs.370581	NM_006367	ENSG00000131236	CAP1	CAP|CAP1-PEN	cyclase associated actin cytoskeleton regulatory protein 1	protein-coding
1545	UPN1545	chr1	40048829	40050366	chr1:40048829-40050366	1	1	2	0		0		1545	chr1	40048829	40050366	+	0		intron (NM_001350484, intron 2 of 13)	intron (NM_001350484, intron 2 of 13)	8746	NM_001350481	10487	Hs.370581	NM_006367	ENSG00000131236	CAP1	CAP|CAP1-PEN	cyclase associated actin cytoskeleton regulatory protein 1	protein-coding
1552	UPN1552	chr1	40077381	40078035	chr1:40077381-40078035	1	1	1	0		0		1552	chr1	40077381	40078035	+	0		intron (NM_000310, intron 7 of 8)	L2c|LINE|L2	19762	NM_000310	5538	Hs.3873	NM_000310	ENSG00000131238	PPT1	CLN1|INCL|PPT	palmitoyl-protein thioesterase 1	protein-coding
1556	UPN1556	chr1	40096862	40097678	chr1:40096862-40097678	1	1	1	0		0		1556	chr1	40096862	40097678	+	0		5' UTR (NM_001142604, exon 1 of 6)	5' UTR (NM_001142604, exon 1 of 6)	200	NM_000310	5538	Hs.3873	NM_000310	ENSG00000131238	PPT1	CLN1|INCL|PPT	palmitoyl-protein thioesterase 1	protein-coding
1569	UPN1569	chr1	40380512	40396412	chr1:40380512-40396412	4	3	2	1	rs2221056	1	rs2221056	1569	chr1	40380512	40396412	+	0		intron (NM_001198978, intron 1 of 9)	LTR12C|LTR|ERV1	-4883	NM_001198979	64744	Hs.15200	NM_022733	ENSG00000084070	SMAP2	SMAP1L	small ArfGAP2	protein-coding
1570	UPN1570	chr1	40397759	40399217	chr1:40397759-40399217	1	1	1	0		0		1570	chr1	40397759	40399217	+	0		intron (NM_001198980, intron 1 of 9)	intron (NM_001198980, intron 1 of 9)	1688	NM_001198980	64744	Hs.15200	NM_022733	ENSG00000084070	SMAP2	SMAP1L	small ArfGAP2	protein-coding
1571	UPN1571	chr1	40399855	40401480	chr1:40399855-40401480	1	1	1	0		0		1571	chr1	40399855	40401480	+	0		intron (NM_001198980, intron 1 of 9)	L2b|LINE|L2	3867	NM_001198980	64744	Hs.15200	NM_022733	ENSG00000084070	SMAP2	SMAP1L	small ArfGAP2	protein-coding
1573	UPN1573	chr1	40402605	40403058	chr1:40402605-40403058	1	1	1	0		0		1573	chr1	40402605	40403058	+	0		intron (NM_001198980, intron 1 of 9)	L1MA4|LINE|L1	6031	NM_001198980	64744	Hs.15200	NM_022733	ENSG00000084070	SMAP2	SMAP1L	small ArfGAP2	protein-coding
1577	UPN1577	chr1	40422468	40424022	chr1:40422468-40424022	1	2	2	0		0		1577	chr1	40422468	40424022	+	0		TTS (NM_022733)	TTS (NM_022733)	26445	NM_001198980	64744	Hs.15200	NM_022733	ENSG00000084070	SMAP2	SMAP1L	small ArfGAP2	protein-coding
1580	UPN1580	chr1	40710279	40712217	chr1:40710279-40712217	1	1	1	0		0		1580	chr1	40710279	40712217	+	0		intron (NM_001308115, intron 1 of 9)	intron (NM_001308115, intron 1 of 9)	1925	NM_001308115	4802	Hs.713051	NM_014223	ENSG00000066136	NFYC	CBF-C|CBFC|H1TF2A|HAP5|HSM|NF-YC	nuclear transcription factor Y subunit gamma	protein-coding
1585	UPN1585	chr1	40801397	40802945	chr1:40801397-40802945	1	1	1	0		0		1585	chr1	40801397	40802945	+	0		intron (NM_172163, intron 1 of 12)	MIRb|SINE|MIR	18159	NM_004700	9132	Hs.473058	NM_004700	ENSG00000117013	KCNQ4	DFNA2|DFNA2A|KV7.4	potassium voltage-gated channel subfamily Q member 4	protein-coding
1588	UPN1588	chr1	40862147	40863033	chr1:40862147-40863033	1	1	1	0		0		1588	chr1	40862147	40863033	+	0		promoter-TSS (NM_133467)	promoter-TSS (NM_133467)	-244	NM_133467	163732	Hs.355820	NM_133467	ENSG00000179862	CITED4	-	Cbp/p300 interacting transactivator with Glu/Asp rich carboxy-terminal domain 4	protein-coding
1589	UPN1589	chr1	40875338	40878548	chr1:40875338-40878548	1	1	1	0		0		1589	chr1	40875338	40878548	+	0		Intergenic	MLT1O|LTR|ERVL-MaLR	-14597	NM_133467	163732	Hs.355820	NM_133467	ENSG00000179862	CITED4	-	Cbp/p300 interacting transactivator with Glu/Asp rich carboxy-terminal domain 4	protein-coding
1593	UPN1593	chr1	40944084	40944776	chr1:40944084-40944776	1	1	1	0		0		1593	chr1	40944084	40944776	+	0		Intergenic	Intergenic	-34869	NM_001905	1503	Hs.473087	NM_001905	ENSG00000171793	CTPS1	CTPS|GATD5|IMD24	CTP synthase 1	protein-coding
1594	UPN1594	chr1	40978939	40979707	chr1:40978939-40979707	1	1	1	0		0		1594	chr1	40978939	40979707	+	0		promoter-TSS (NM_001905)	promoter-TSS (NM_001905)	24	NR_125440	1503	Hs.473087	NM_001905	ENSG00000171793	CTPS1	CTPS|GATD5|IMD24	CTP synthase 1	protein-coding
1596	UPN1596	chr1	40981447	40982431	chr1:40981447-40982431	1	1	1	0		0		1596	chr1	40981447	40982431	+	0		intron (NR_125440, intron 1 of 17)	intron (NR_125440, intron 1 of 17)	2640	NR_125440	1503	Hs.473087	NM_001905	ENSG00000171793	CTPS1	CTPS|GATD5|IMD24	CTP synthase 1	protein-coding
1601	UPN1601	chr1	41108357	41110465	chr1:41108357-41110465	2	2	1	0		0		1601	chr1	41108357	41110465	+	0		intron (NM_001172222, intron 4 of 10)	intron (NM_001172222, intron 4 of 10)	52021	NR_135092	22955	Hs.571874	NM_012236	ENSG00000010803	SCMH1	Scml3	Scm polycomb group protein homolog 1	protein-coding
1603	UPN1603	chr1	41240968	41241584	chr1:41240968-41241584	1	1	1	0		0		1603	chr1	41240968	41241584	+	0		intron (NM_001172218, intron 1 of 15)	L3|LINE|CR1	867	NM_001172219	22955	Hs.571874	NM_012236	ENSG00000010803	SCMH1	Scml3	Scm polycomb group protein homolog 1	protein-coding
1604	UPN1604	chr1	41242447	41242884	chr1:41242447-41242884	1	1	1	0		0		1604	chr1	41242447	41242884	+	0		promoter-TSS (NM_001350667)	promoter-TSS (NM_001350667)	-522	NM_001172218	22955	Hs.571874	NM_012236	ENSG00000010803	SCMH1	Scml3	Scm polycomb group protein homolog 1	protein-coding
1612	UPN1612	chr1	41493787	41498166	chr1:41493787-41498166	1	1	1	0		0		1612	chr1	41493787	41498166	+	0		Intergenic	MIR|SINE|MIR	-11293	NR_126098	1907	Hs.1407	NM_001956	ENSG00000127129	EDN2	ET-2|ET2|PPET2	endothelin 2	protein-coding
1614	UPN1614	chr1	41661475	41662026	chr1:41661475-41662026	1	1	1	0		0		1614	chr1	41661475	41662026	+	0		intron (NM_001127714, intron 1 of 7)	CpG	-177067	NR_126098	1907	Hs.1407	NM_001956	ENSG00000127129	EDN2	ET-2|ET2|PPET2	endothelin 2	protein-coding
1615	UPN1615	chr1	41662634	41663757	chr1:41662634-41663757	1	1	1	0		0		1615	chr1	41662634	41663757	+	0		intron (NM_001127714, intron 1 of 7)	intron (NM_001127714, intron 1 of 7)	-178512	NR_126098	1907	Hs.1407	NM_001956	ENSG00000127129	EDN2	ET-2|ET2|PPET2	endothelin 2	protein-coding
1618	UPN1618	chr1	41726936	41728124	chr1:41726936-41728124	1	1	1	0		0		1618	chr1	41726936	41728124	+	0		intron (NM_024503, intron 1 of 8)	intron (NM_024503, intron 1 of 8)	191177	NM_001127714	59269	Hs.403972	NM_024503	ENSG00000127124	HIVEP3	KBP-1|KBP1|KRC|SHN3|Schnurri-3|ZAS3|ZNF40C	human immunodeficiency virus type I enhancer binding protein 3	protein-coding
1619	UPN1619	chr1	41738505	41741803	chr1:41738505-41741803	1	1	1	0		0		1619	chr1	41738505	41741803	+	0		intron (NM_024503, intron 1 of 8)	intron (NM_024503, intron 1 of 8)	178553	NM_001127714	59269	Hs.403972	NM_024503	ENSG00000127124	HIVEP3	KBP-1|KBP1|KRC|SHN3|Schnurri-3|ZAS3|ZNF40C	human immunodeficiency virus type I enhancer binding protein 3	protein-coding
1631	UPN1631	chr1	42456640	42457451	chr1:42456640-42457451	1	1	1	0		0		1631	chr1	42456640	42457451	+	0		promoter-TSS (NM_001146192)	promoter-TSS (NM_001146192)	551	NM_001287511	79717	Hs.706662	NM_024664	ENSG00000127125	PPCS	-	phosphopantothenoylcysteine synthetase	protein-coding
1637	UPN1637	chr1	42924125	42925790	chr1:42924125-42925790	1	1	1	0		0		1637	chr1	42924125	42925790	+	0		TTS (NM_006516)	TTS (NM_006516)	-34092	NR_033967	440584	Hs.260928	NR_033967	ENSG00000227533	SLC2A1-AS1	-	SLC2A1 antisense RNA 1	ncRNA
1638	UPN1638	chr1	42930380	42939634	chr1:42930380-42939634	2	2	1	0		0		1638	chr1	42930380	42939634	+	0		intron (NM_006516, intron 2 of 9)	intron (NM_006516, intron 2 of 9)	-24042	NR_033967	440584	Hs.260928	NR_033967	ENSG00000227533	SLC2A1-AS1	-	SLC2A1 antisense RNA 1	ncRNA
1639	UPN1639	chr1	42940083	42945299	chr1:42940083-42945299	2	1	1	0		0		1639	chr1	42940083	42945299	+	0		intron (NM_006516, intron 2 of 9)	MIRc|SINE|MIR	-16358	NR_033967	440584	Hs.260928	NR_033967	ENSG00000227533	SLC2A1-AS1	-	SLC2A1 antisense RNA 1	ncRNA
1641	UPN1641	chr1	42957294	42959751	chr1:42957294-42959751	1	1	2	0		0		1641	chr1	42957294	42959751	+	0		promoter-TSS (NR_033967)	promoter-TSS (NR_033967)	-527	NR_033967	440584	Hs.260928	NR_033967	ENSG00000227533	SLC2A1-AS1	-	SLC2A1 antisense RNA 1	ncRNA
1654	UPN1654	chr1	43348839	43350016	chr1:43348839-43350016	1	1	1	0		0		1654	chr1	43348839	43350016	+	0		intron (NM_005373, intron 10 of 11)	CpG-1006	-9528	NM_001255	991	Hs.524947	NM_001255	ENSG00000117399	CDC20	CDC20A|bA276H19.3|p55CDC	cell division cycle 20	protein-coding
1656	UPN1656	chr1	43365591	43367928	chr1:43365591-43367928	1	1	1	0		0		1656	chr1	43365591	43367928	+	0		intron (NM_001256401, intron 1 of 6)	intron (NM_001256401, intron 1 of 6)	979	NM_001256399	64834	Hs.25597	NM_022821	ENSG00000066322	ELOVL1	CGI-88|Ssc1	ELOVL fatty acid elongase 1	protein-coding
1657	UPN1657	chr1	43368277	43369145	chr1:43368277-43369145	1	1	1	0		0		1657	chr1	43368277	43369145	+	0		promoter-TSS (NR_046117)	promoter-TSS (NR_046117)	-637	NM_022821	64834	Hs.25597	NM_022821	ENSG00000066322	ELOVL1	CGI-88|Ssc1	ELOVL fatty acid elongase 1	protein-coding
1668	UPN1668	chr1	43785636	43786655	chr1:43785636-43786655	1	1	1	0		0		1668	chr1	43785636	43786655	+	0		intron (NM_001270465, intron 2 of 7)	L2a|LINE|L2	-52477	NR_106727	102464830		NR_106727	ENSG00000283477	MIR6079	hsa-mir-6079	microRNA 6079	ncRNA
1671	UPN1671	chr1	43832947	43836054	chr1:43832947-43836054	2	1	1	0		0		1671	chr1	43832947	43836054	+	0		intron (NM_174968, intron 5 of 12)	L2|LINE|L2	-4122	NR_106727	102464830		NR_106727	ENSG00000283477	MIR6079	hsa-mir-6079	microRNA 6079	ncRNA
1673	UPN1673	chr1	43970058	43970368	chr1:43970058-43970368	1	1	1	0		0		1673	chr1	43970058	43970368	+	0		exon (NM_001384, exon 1 of 6)	exon (NM_001384, exon 1 of 6)	232	NM_001319170	1802	Hs.632398	NM_001384	ENSG00000132768	DPH2	DPH2L2	DPH2 homolog	protein-coding
1677	UPN1677	chr1	43979610	43980451	chr1:43979610-43980451	1	1	1	0		0		1677	chr1	43979610	43980451	+	0		promoter-TSS (NM_030587)	promoter-TSS (NM_030587)	94	NM_030587	8704	Hs.632403	NM_003780	ENSG00000117411	B4GALT2	B4Gal-T2|B4Gal-T3|beta4Gal-T2	beta-1,4-galactosyltransferase 2	protein-coding
1685	UPN1685	chr1	44238367	44240301	chr1:44238367-44240301	1	1	1	0		0		1685	chr1	44238367	44240301	+	0		intron (NR_110056, intron 2 of 3)	intron (NR_110056, intron 2 of 3)	4949	NR_046817	100874278	Hs.132497	NR_046817	ENSG00000233602	ERI3-IT1	-	ERI3 intronic transcript 1	ncRNA
1691	UPN1691	chr1	44631092	44631916	chr1:44631092-44631916	1	1	1	0		0		1691	chr1	44631092	44631916	+	0		intron (NM_018150, intron 5 of 14)	L2b|LINE|L2	39552	NR_145816	109623472		NR_145816		SNORD145	-	small nucleolar RNA, C/D box 145	snoRNA
1692	UPN1692	chr1	44672058	44674163	chr1:44672058-44674163	1	1	1	0		0		1692	chr1	44672058	44674163	+	0		intron (NM_001300747, intron 1 of 2)	intron (NM_001300747, intron 1 of 2)	1498	NM_001300748	79639	Hs.22157	NM_024587	ENSG00000126106	TMEM53	NET4	transmembrane protein 53	protein-coding
1693	UPN1693	chr1	44675914	44677632	chr1:44675914-44677632	2	1	1	0		0		1693	chr1	44675914	44677632	+	0		intron (NM_001145636, intron 1 of 11)	intron (NM_001145636, intron 1 of 11)	2051	NM_001145636	339541	Hs.173679	NM_001004307	ENSG00000198520	ARMH1	C1orf228|NCRNA00082|p40	armadillo-like helical domain containing 1	protein-coding
1694	UPN1694	chr1	44723801	44724316	chr1:44723801-44724316	1	1	1	0		0		1694	chr1	44723801	44724316	+	0		intron (NM_001145636, intron 6 of 11)	CpG	-2157	NR_002753	26828		NR_002753	ENSG00000199377	RNU5F-1	RNU5F|U5F	RNA, U5F small nuclear 1	snRNA
1695	UPN1695	chr1	44730225	44730907	chr1:44730225-44730907	1	1	1	0		0		1695	chr1	44730225	44730907	+	0		TTS (NR_002755)	TTS (NR_002755)	602	NR_002755	26830		NR_002755	ENSG00000200169	RNU5D-1	RNU5D|U5DL|U5DS	RNA, U5D small nuclear 1	snRNA
1697	UPN1697	chr1	44775866	44777316	chr1:44775866-44777316	1	1	1	0		0		1697	chr1	44775866	44777316	+	0		promoter-TSS (NR_000024)	promoter-TSS (NR_000024)	99	NR_000024	94161		NR_000024	ENSG00000200913	SNORD46	RNU40|RNU46|U40|U46	small nucleolar RNA, C/D box 46	snoRNA
1700	UPN1700	chr1	44800610	44814201	chr1:44800610-44814201	2	1	1	0		0		1700	chr1	44800610	44814201	+	0		promoter-TSS (NM_001013632)	promoter-TSS (NM_001013632)	-120	NM_001013632	343521	Hs.585137	NM_001013632	ENSG00000188396	TCTEX1D4	-	Tctex1 domain containing 4	protein-coding
1702	UPN1702	chr1	44820217	44821664	chr1:44820217-44821664	1	1	1	0		0		1702	chr1	44820217	44821664	+	0		intron (NM_001166292, intron 22 of 22)	intron (NM_001166292, intron 22 of 22)	12458	NM_001136537	149478	Hs.632400	NM_001136537	ENSG00000222009	BTBD19	-	BTB domain containing 19	protein-coding
1703	UPN1703	chr1	44826351	44827577	chr1:44826351-44827577	1	1	1	0		0		1703	chr1	44826351	44827577	+	0		exon (NM_003738, exon 17 of 22)	exon (NM_003738, exon 17 of 22)	15980	NM_003738	8643	Hs.591497	NM_003738	ENSG00000117425	PTCH2	PTC2	patched 2	protein-coding
1705	UPN1705	chr1	45009978	45012090	chr1:45009978-45012090	1	1	1	0		0		1705	chr1	45009978	45012090	+	0		exon (NM_024602, exon 1 of 21)	exon (NM_024602, exon 1 of 21)	321	NM_024602	79654	Hs.525084	NM_024602	ENSG00000126107	HECTD3	-	HECT domain E3 ubiquitin protein ligase 3	protein-coding
1706	UPN1706	chr1	45303989	45304876	chr1:45303989-45304876	1	1	1	0		0		1706	chr1	45303989	45304876	+	0		non-coding (NR_024270, exon 1 of 1)	non-coding (NR_024270, exon 1 of 1)	522	NR_024270	400752	Hs.334348	NR_024270	ENSG00000281912	LINC01144	-	long intergenic non-protein coding RNA 1144	ncRNA
1715	UPN1715	chr1	45550367	45550685	chr1:45550367-45550685	1	1	1	0		0		1715	chr1	45550367	45550685	+	0		promoter-TSS (NM_006066)	promoter-TSS (NM_006066)	-257	NM_001202414	10327	Hs.474584	NM_006066	ENSG00000117448	AKR1A1	ALDR1|ALR|ARM|DD3|HEL-S-6	aldo-keto reductase family 1 member A1	protein-coding
1717	UPN1717	chr1	45608021	45609521	chr1:45608021-45609521	1	1	2	0		0		1717	chr1	45608021	45609521	+	0		intron (NM_001195193, intron 4 of 12)	intron (NM_001195193, intron 4 of 12)	15288	NM_001114938	149483	Hs.18912	NM_152500	ENSG00000159588	CCDC17	-	coiled-coil domain containing 17	protein-coding
1718	UPN1718	chr1	45620306	45623144	chr1:45620306-45623144	1	1	1	0		0		1718	chr1	45620306	45623144	+	0		exon (NM_001190182, exon 9 of 13)	exon (NM_001190182, exon 9 of 13)	2334	NM_001114938	149483	Hs.18912	NM_152500	ENSG00000159588	CCDC17	-	coiled-coil domain containing 17	protein-coding
1722	UPN1722	chr1	45802139	45803390	chr1:45802139-45803390	1	1	1	0		0		1722	chr1	45802139	45803390	+	0		promoter-TSS (NM_015112)	promoter-TSS (NM_015112)	-843	NM_001324320	23139	Hs.319481	NM_015112	ENSG00000086015	MAST2	MAST205|MTSSK	microtubule associated serine/threonine kinase 2	protein-coding
1724	UPN1724	chr1	45954104	45954569	chr1:45954104-45954569	1	1	1	0		0		1724	chr1	45954104	45954569	+	0		intron (NM_001324321, intron 3 of 28)	intron (NM_001324321, intron 3 of 28)	89988	NM_001324321	23139	Hs.319481	NM_015112	ENSG00000086015	MAST2	MAST205|MTSSK	microtubule associated serine/threonine kinase 2	protein-coding
1726	UPN1726	chr1	46133245	46133798	chr1:46133245-46133798	1	1	1	0		0		1726	chr1	46133245	46133798	+	0		promoter-TSS (NM_001303429)	promoter-TSS (NM_001303429)	150	NR_125987	101929626	Hs.534951	NR_125987	ENSG00000227857	LOC101929626	-	uncharacterized LOC101929626	ncRNA
1727	UPN1727	chr1	46166513	46167837	chr1:46166513-46167837	1	1	2	0		0		1727	chr1	46166513	46167837	+	0		intron (NM_001303427, intron 1 of 9)	CpG	7726	NM_001328648	8503	Hs.655387	NM_003629	ENSG00000117461	PIK3R3	p55|p55-GAMMA|p55PIK	phosphoinositide-3-kinase regulatory subunit 3	protein-coding
1732	UPN1732	chr1	46183034	46184399	chr1:46183034-46184399	1	1	1	0		0		1732	chr1	46183034	46184399	+	0		intron (NM_005727, intron 3 of 8)	intron (NM_005727, intron 3 of 8)	-7221	NM_001303427	110117499	Hs.655387	NM_001303427	ENSG00000278139	LOC110117498-PIK3R3	-	LOC110117498-PIK3R3 readthrough	protein-coding
1735	UPN1735	chr1	46196818	46198887	chr1:46196818-46198887	1	1	1	0		0		1735	chr1	46196818	46198887	+	0		promoter-TSS (NM_001290130)	promoter-TSS (NM_001290130)	-353	NM_001290130	55624	Hs.525134	NM_017739	ENSG00000085998	POMGNT1	GNTI.2|GnT I.2|LGMD2O|MEB|MGAT1.2|RP76|gnT-I.2	protein O-linked mannose N-acetylglucosaminyltransferase 1 (beta 1,2-)	protein-coding
1736	UPN1736	chr1	46203148	46205311	chr1:46203148-46205311	1	1	1	0		0		1736	chr1	46203148	46205311	+	0		intron (NM_001013615, intron 1 of 1)	intron (NM_001013615, intron 1 of 1)	895	NM_001013615	541468	Hs.568642	NM_001013615	ENSG00000171357	LURAP1	C1orf190|LRAP35a|LRP35A	leucine rich adaptor protein 1	protein-coding
1737	UPN1737	chr1	46300769	46302909	chr1:46300769-46302909	1	1	1	0		0		1737	chr1	46300769	46302909	+	0		intron (NM_006369, intron 1 of 9)	CpG	1527	NM_006369	10489	Hs.144941	NM_006369	ENSG00000132128	LRRC41	MUF1|PP7759	leucine rich repeat containing 41	protein-coding
1738	UPN1738	chr1	46341320	46342514	chr1:46341320-46342514	1	1	1	0		0		1738	chr1	46341320	46342514	+	0		intron (NM_001256127, intron 1 of 5)	intron (NM_001256127, intron 1 of 5)	739	NM_001256127	387338	Hs.163424	NM_199044	ENSG00000117481	NSUN4	SHTAP	NOP2/Sun RNA methyltransferase family member 4	protein-coding
1741	UPN1741	chr1	46580393	46581392	chr1:46580393-46581392	1	1	1	0		0		1741	chr1	46580393	46581392	+	0		intron (NM_001135553, intron 3 of 12)	L2c|LINE|L2	23402	NM_198973	8569	Hs.371594	NM_003684	ENSG00000079277	MKNK1	MNK1	MAP kinase interacting serine/threonine kinase 1	protein-coding
1742	UPN1742	chr1	46581819	46584379	chr1:46581819-46584379	1	1	1	0		0		1742	chr1	46581819	46584379	+	0		intron (NM_001135553, intron 3 of 12)	intron (NM_001135553, intron 3 of 12)	21195	NM_198973	8569	Hs.371594	NM_003684	ENSG00000079277	MKNK1	MNK1	MAP kinase interacting serine/threonine kinase 1	protein-coding
1745	UPN1745	chr1	46594462	46597751	chr1:46594462-46597751	1	2	1	0		0		1745	chr1	46594462	46597751	+	0		intron (NR_146512, intron 1 of 11)	intron (NR_146512, intron 1 of 11)	8188	NM_198973	8569	Hs.371594	NM_003684	ENSG00000079277	MKNK1	MNK1	MAP kinase interacting serine/threonine kinase 1	protein-coding
1751	UPN1751	chr1	46612920	46617436	chr1:46612920-46617436	1	1	2	0		0		1751	chr1	46612920	46617436	+	0		promoter-TSS (NM_145279)	promoter-TSS (NM_145279)	-45	NM_145279	148932	Hs.632401	NM_145279	ENSG00000142961	MOB3C	MOB1E|MOBKL2C	MOB kinase activator 3C	protein-coding
1756	UPN1756	chr1	46802653	46808034	chr1:46802653-46808034	2	1	2	0		0		1756	chr1	46802653	46808034	+	0		intron (NM_001319162, intron 1 of 9)	MIRb|SINE|MIR	6345	NM_001319161	1580	Hs.436317	NM_000779	ENSG00000142973	CYP4B1	CYPIVB1|P-450HP	cytochrome P450 family 4 subfamily B member 1	protein-coding
1765	UPN1765	chr1	47230404	47232773	chr1:47230404-47232773	1	1	2	0		0		1765	chr1	47230404	47232773	+	0		intron (NM_001290404, intron 1 of 5)	CpG-1082	127	NM_001287347	6886	Hs.705618	NM_003189	ENSG00000162367	TAL1	SCL|TCL5|bHLHa17|tal-1	TAL bHLH transcription factor 1, erythroid differentiation factor	protein-coding
1768	UPN1768	chr1	47332144	47333559	chr1:47332144-47333559	1	1	1	0		0		1768	chr1	47332144	47333559	+	0		promoter-TSS (NM_016308)	promoter-TSS (NM_016308)	-946	NR_046395	51727	Hs.731647	NM_016308	ENSG00000162368	CMPK1	CK|CMK|CMPK|UMK|UMP-CMPK|UMPK	cytidine/uridine monophosphate kinase 1	protein-coding
1770	UPN1770	chr1	47436873	47438297	chr1:47436873-47438297	1	1	1	0		0		1770	chr1	47436873	47438297	+	0		promoter-TSS (NR_126355)	promoter-TSS (NR_126355)	-268	NR_126355	102724077	Hs.159718	NR_126355		LINC01389	-	long intergenic non-protein coding RNA 1389	ncRNA
1774	UPN1774	chr1	48046823	48048018	chr1:48046823-48048018	1	1	1	0		0		1774	chr1	48046823	48048018	+	0		Intergenic	L2b|LINE|L2	-50530	NM_001194986	388630	Hs.61504	NM_001194986	ENSG00000269113	TRABD2B	TIKI2	TraB domain containing 2B	protein-coding
1775	UPN1775	chr1	48048318	48049856	chr1:48048318-48049856	1	1	1	0		0		1775	chr1	48048318	48049856	+	0		Intergenic	Intergenic	-52197	NM_001194986	388630	Hs.61504	NM_001194986	ENSG00000269113	TRABD2B	TIKI2	TraB domain containing 2B	protein-coding
1776	UPN1776	chr1	48050059	48051726	chr1:48050059-48051726	1	2	1	0		0		1776	chr1	48050059	48051726	+	0		Intergenic	L2b|LINE|L2	-54002	NM_001194986	388630	Hs.61504	NM_001194986	ENSG00000269113	TRABD2B	TIKI2	TraB domain containing 2B	protein-coding
1779	UPN1779	chr1	48470359	48472072	chr1:48470359-48472072	1	1	1	0		0		1779	chr1	48470359	48472072	+	0		intron (NM_019073, intron 1 of 12)	intron (NM_019073, intron 1 of 12)	993	NM_001286239	54558	Hs.538103	NM_019073	ENSG00000132122	SPATA6	HASH|SRF-1|SRF1	spermatogenesis associated 6	protein-coding
1789	UPN1789	chr1	51433174	51434816	chr1:51433174-51434816	2	2	1	0		0		1789	chr1	51433174	51434816	+	0		intron (NM_001981, intron 12 of 24)	intron (NM_001981, intron 12 of 24)	-11874	NM_001159969	2060	Hs.83722	NM_001981	ENSG00000085832	EPS15	AF-1P|AF1P|MLLT5	epidermal growth factor receptor pathway substrate 15	protein-coding
1796	UPN1796	chr1	51548406	51550295	chr1:51548406-51550295	1	1	1	0		0		1796	chr1	51548406	51550295	+	0		Intergenic	L2a|LINE|L2	-30027	NM_001981	2060	Hs.83722	NM_001981	ENSG00000085832	EPS15	AF-1P|AF1P|MLLT5	epidermal growth factor receptor pathway substrate 15	protein-coding
1812	UPN1812	chr1	52602070	52603215	chr1:52602070-52603215	1	1	1	0		0		1812	chr1	52602070	52603215	+	0		intron (NM_015696, intron 1 of 2)	CpG	271	NM_015696	2882	Hs.43728	NM_015696	ENSG00000116157	GPX7	CL683|GPX6|GPx-7|GSHPx-7|NPGPx	glutathione peroxidase 7	protein-coding
1814	UPN1814	chr1	52631664	52634180	chr1:52631664-52634180	1	1	2	0		0		1814	chr1	52631664	52634180	+	0		promoter-TSS (NR_135156)	promoter-TSS (NR_135156)	-422	NM_001042693	348378	Hs.424589	NM_001042693	ENSG00000182183	SHISAL2A	FAM159A|PRO7171|WWLS2783	shisa like 2A	protein-coding
1818	UPN1818	chr1	52703248	52703823	chr1:52703248-52703823	1	1	1	0		0		1818	chr1	52703248	52703823	+	0		Intergenic	Intergenic	-5169	NM_023077	65260	Hs.349905	NM_023077	ENSG00000162377	COA7	C1orf163|RESA1|SELRC1	cytochrome c oxidase assembly factor 7 (putative)	protein-coding
1826	UPN1826	chr1	53060881	53063483	chr1:53060881-53063483	1	1	1	0		0		1826	chr1	53060881	53063483	+	0		5' UTR (NM_153703, exon 1 of 11)	5' UTR (NM_153703, exon 1 of 11)	130	NM_001199080	127435	Hs.586141	NM_153703	ENSG00000174348	PODN	PCAN|SLRR5A	podocan	protein-coding
1831	UPN1831	chr1	53122174	53124164	chr1:53122174-53124164	2	1	1	0		0		1831	chr1	53122174	53124164	+	0		intron (NM_006671, intron 2 of 10)	intron (NM_006671, intron 2 of 10)	19463	NR_109858	6512	Hs.104637	NM_006671	ENSG00000162383	SLC1A7	AAAT|EAAT5	solute carrier family 1 member 7	protein-coding
1837	UPN1837	chr1	53145836	53146886	chr1:53145836-53146886	1	1	1	0		0		1837	chr1	53145836	53146886	+	0		Intergenic	Intergenic	-3729	NM_001287597	6512	Hs.104637	NM_006671	ENSG00000162383	SLC1A7	AAAT|EAAT5	solute carrier family 1 member 7	protein-coding
1840	UPN1840	chr1	53195661	53196594	chr1:53195661-53196594	1	1	1	0		0		1840	chr1	53195661	53196594	+	0		promoter-TSS (NM_000098)	promoter-TSS (NM_000098)	-302	NM_001330589	1376	Hs.713535	NM_000098	ENSG00000157184	CPT2	CPT1|CPTASE|IIAE4	carnitine palmitoyltransferase 2	protein-coding
1841	UPN1841	chr1	53197121	53198833	chr1:53197121-53198833	1	1	1	0		0		1841	chr1	53197121	53198833	+	0		intron (NM_001330589, intron 1 of 4)	intron (NM_001330589, intron 1 of 4)	1548	NM_000098	1376	Hs.713535	NM_000098	ENSG00000157184	CPT2	CPT1|CPTASE|IIAE4	carnitine palmitoyltransferase 2	protein-coding
1851	UPN1851	chr1	53512398	53513507	chr1:53512398-53513507	1	1	1	0		0		1851	chr1	53512398	53513507	+	0		intron (NM_147193, intron 7 of 9)	intron (NM_147193, intron 7 of 9)	53553	NM_033067	63948	Hs.131654	NM_033067	ENSG00000143006	DMRTB1	-	DMRT like family B with proline rich C-terminal 1	protein-coding
1852	UPN1852	chr1	53541264	53543909	chr1:53541264-53543909	1	1	1	0		0		1852	chr1	53541264	53543909	+	0		intron (NM_147193, intron 3 of 9)	intron (NM_147193, intron 3 of 9)	83187	NM_033067	63948	Hs.131654	NM_033067	ENSG00000143006	DMRTB1	-	DMRT like family B with proline rich C-terminal 1	protein-coding
1858	UPN1858	chr1	53946694	53947761	chr1:53946694-53947761	1	1	1	0		0		1858	chr1	53946694	53947761	+	0		promoter-TSS (NM_001316935)	promoter-TSS (NM_001316935)	901	NM_001256409	115353	Hs.40094	NM_052940	ENSG00000116212	LRRC42	dJ167A19.4	leucine rich repeat containing 42	protein-coding
1860	UPN1860	chr1	53981377	53982895	chr1:53981377-53982895	2	1	1	0		0		1860	chr1	53981377	53982895	+	0		Intergenic	AluSz|SINE|Alu	35810	NM_001256409	115353	Hs.40094	NM_052940	ENSG00000116212	LRRC42	dJ167A19.4	leucine rich repeat containing 42	protein-coding
1862	UPN1862	chr1	54219226	54220848	chr1:54219226-54220848	1	1	1	0		0		1862	chr1	54219226	54220848	+	0		intron (NM_001330602, intron 6 of 6)	L1MC5a|LINE|L1	-16406	NR_103541	619518	Hs.591438	NM_001034847	ENSG00000198711	SSBP3-AS1	C1orf191|MST128|MSTP128	SSBP3 antisense RNA 1	ncRNA
1866	UPN1866	chr1	54271417	54280870	chr1:54271417-54280870	1	1	1	0		0		1866	chr1	54271417	54280870	+	0		intron (NM_018070, intron 5 of 16)	intron (NM_018070, intron 5 of 16)	39700	NR_103541	619518	Hs.591438	NM_001034847	ENSG00000198711	SSBP3-AS1	C1orf191|MST128|MSTP128	SSBP3 antisense RNA 1	ncRNA
1870	UPN1870	chr1	54285743	54288711	chr1:54285743-54288711	1	1	1	0		0		1870	chr1	54285743	54288711	+	0		intron (NM_001009955, intron 4 of 16)	intron (NM_001009955, intron 4 of 16)	50784	NR_103541	619518	Hs.591438	NM_001034847	ENSG00000198711	SSBP3-AS1	C1orf191|MST128|MSTP128	SSBP3 antisense RNA 1	ncRNA
1871	UPN1871	chr1	54289625	54290762	chr1:54289625-54290762	1	1	1	0		0		1871	chr1	54289625	54290762	+	0		intron (NM_001009955, intron 4 of 16)	intron (NM_001009955, intron 4 of 16)	53750	NR_103541	619518	Hs.591438	NM_001034847	ENSG00000198711	SSBP3-AS1	C1orf191|MST128|MSTP128	SSBP3 antisense RNA 1	ncRNA
1876	UPN1876	chr1	54297608	54298862	chr1:54297608-54298862	1	1	1	0		0		1876	chr1	54297608	54298862	+	0		intron (NM_001009955, intron 4 of 16)	intron (NM_001009955, intron 4 of 16)	61792	NR_103541	619518	Hs.591438	NM_001034847	ENSG00000198711	SSBP3-AS1	C1orf191|MST128|MSTP128	SSBP3 antisense RNA 1	ncRNA
1880	UPN1880	chr1	54324470	54325365	chr1:54324470-54325365	1	1	1	0		0		1880	chr1	54324470	54325365	+	0		intron (NM_001009955, intron 4 of 16)	intron (NM_001009955, intron 4 of 16)	81478	NM_145716	23648	Hs.476706	NM_018070	ENSG00000157216	SSBP3	CSDP|SSDP|SSDP1	single stranded DNA binding protein 3	protein-coding
1881	UPN1881	chr1	54325742	54329055	chr1:54325742-54329055	1	1	2	0		0		1881	chr1	54325742	54329055	+	0		intron (NM_001009955, intron 4 of 16)	intron (NM_001009955, intron 4 of 16)	78997	NM_145716	23648	Hs.476706	NM_018070	ENSG00000157216	SSBP3	CSDP|SSDP|SSDP1	single stranded DNA binding protein 3	protein-coding
1884	UPN1884	chr1	54334522	54336916	chr1:54334522-54336916	1	1	2	0		0		1884	chr1	54334522	54336916	+	0		intron (NM_001009955, intron 4 of 16)	intron (NM_001009955, intron 4 of 16)	70676	NM_145716	23648	Hs.476706	NM_018070	ENSG00000157216	SSBP3	CSDP|SSDP|SSDP1	single stranded DNA binding protein 3	protein-coding
1885	UPN1885	chr1	54384625	54385497	chr1:54384625-54385497	1	1	1	0		0		1885	chr1	54384625	54385497	+	0		intron (NM_001009955, intron 4 of 16)	intron (NM_001009955, intron 4 of 16)	21334	NM_145716	23648	Hs.476706	NM_018070	ENSG00000157216	SSBP3	CSDP|SSDP|SSDP1	single stranded DNA binding protein 3	protein-coding
1888	UPN1888	chr1	54407820	54409429	chr1:54407820-54409429	1	1	1	0		0		1888	chr1	54407820	54409429	+	0		Intergenic	MIRc|SINE|MIR	-2229	NM_001009955	23648	Hs.476706	NM_018070	ENSG00000157216	SSBP3	CSDP|SSDP|SSDP1	single stranded DNA binding protein 3	protein-coding
1899	UPN1899	chr1	55215590	55217035	chr1:55215590-55217035	1	1	1	0		0		1899	chr1	55215590	55217035	+	0		promoter-TSS (NM_015306)	promoter-TSS (NM_015306)	904	NR_038320	100507634	Hs.735428	NR_038320		LOC100507634	-	uncharacterized LOC100507634	ncRNA
1924	UPN1924	chr1	58583448	58586567	chr1:58583448-58586567	1	1	1	0		0		1924	chr1	58583448	58586567	+	0		Intergenic	L3|LINE|CR1	-7513	NM_002353	4070	Hs.23582	NM_002353	ENSG00000184292	TACSTD2	EGP-1|EGP1|GA733-1|GA7331|GP50|M1S1|TROP2	tumor associated calcium signal transducer 2	protein-coding
1925	UPN1925	chr1	58591846	58593644	chr1:58591846-58593644	1	2	1	0		0		1925	chr1	58591846	58593644	+	0		Intergenic	Intergenic	-15251	NM_002353	4070	Hs.23582	NM_002353	ENSG00000184292	TACSTD2	EGP-1|EGP1|GA733-1|GA7331|GP50|M1S1|TROP2	tumor associated calcium signal transducer 2	protein-coding
1934	UPN1934	chr1	58785416	58786053	chr1:58785416-58786053	1	1	1	0		0		1934	chr1	58785416	58786053	+	0		intron (NR_108106, intron 1 of 1)	intron (NR_108106, intron 1 of 1)	583	NR_034014	100131060	Hs.680604	NR_034014	ENSG00000234807	LINC01135	-	long intergenic non-protein coding RNA 1135	ncRNA
1935	UPN1935	chr1	58812516	58817286	chr1:58812516-58817286	1	2	2	0		0		1935	chr1	58812516	58817286	+	0		intron (NR_108106, intron 1 of 1)	MIRb|SINE|MIR	29750	NR_034014	100131060	Hs.680604	NR_034014	ENSG00000234807	LINC01135	-	long intergenic non-protein coding RNA 1135	ncRNA
1937	UPN1937	chr1	58882294	58885384	chr1:58882294-58885384	1	1	2	0		0		1937	chr1	58882294	58885384	+	0		intron (NR_108106, intron 1 of 1)	L3|LINE|CR1	98688	NR_034014	100131060	Hs.680604	NR_034014	ENSG00000234807	LINC01135	-	long intergenic non-protein coding RNA 1135	ncRNA
1939	UPN1939	chr1	58895127	58896964	chr1:58895127-58896964	1	2	2	0		0		1939	chr1	58895127	58896964	+	0		intron (NR_034015, intron 2 of 2)	intron (NR_034015, intron 2 of 2)	110894	NR_034014	100131060	Hs.680604	NR_034014	ENSG00000234807	LINC01135	-	long intergenic non-protein coding RNA 1135	ncRNA
1941	UPN1941	chr1	58898661	58900671	chr1:58898661-58900671	2	1	1	0		0		1941	chr1	58898661	58900671	+	0		TTS (NR_108106)	TTS (NR_108106)	114515	NR_034014	100131060	Hs.680604	NR_034014	ENSG00000234807	LINC01135	-	long intergenic non-protein coding RNA 1135	ncRNA
1948	UPN1948	chr1	59012843	59016354	chr1:59012843-59016354	1	2	3	0		0		1948	chr1	59012843	59016354	+	0		Intergenic	Intergenic	-5878	NR_110626	101926925		NR_110626		LINC01358	-	long intergenic non-protein coding RNA 1358	ncRNA
1949	UPN1949	chr1	59019607	59020811	chr1:59019607-59020811	1	1	1	0		0		1949	chr1	59019607	59020811	+	0		promoter-TSS (NR_110626)	promoter-TSS (NR_110626)	-267	NR_110626	101926925		NR_110626		LINC01358	-	long intergenic non-protein coding RNA 1358	ncRNA
1955	UPN1955	chr1	59056263	59058227	chr1:59056263-59058227	2	1	3	0		0		1955	chr1	59056263	59058227	+	0		intron (NR_110626, intron 2 of 2)	intron (NR_110626, intron 2 of 2)	36769	NR_110626	101926925		NR_110626		LINC01358	-	long intergenic non-protein coding RNA 1358	ncRNA
1962	UPN1962	chr1	59150698	59152158	chr1:59150698-59152158	1	1	1	0		0		1962	chr1	59150698	59152158	+	0		Intergenic	Intergenic	-4621	NR_027120	729467	Hs.662291	NR_027120	ENSG00000224609	HSD52	-	uncharacterized LOC729467	ncRNA
1967	UPN1967	chr1	59295578	59296064	chr1:59295578-59296064	1	1	1	0		0		1967	chr1	59295578	59296064	+	0		promoter-TSS (NM_001350793)	promoter-TSS (NM_001350793)	-817	NM_001350798	55277	Hs.444301	NM_018291	ENSG00000172456	FGGY	-	FGGY carbohydrate kinase domain containing	protein-coding
1968	UPN1968	chr1	59297069	59298626	chr1:59297069-59298626	1	1	1	0		0		1968	chr1	59297069	59298626	+	0		intron (NM_001113411, intron 1 of 16)	intron (NM_001113411, intron 1 of 16)	835	NR_103473	55277	Hs.444301	NM_018291	ENSG00000172456	FGGY	-	FGGY carbohydrate kinase domain containing	protein-coding
1973	UPN1973	chr1	59367544	59367926	chr1:59367544-59367926	1	1	1	0		0		1973	chr1	59367544	59367926	+	0		intron (NM_001113411, intron 4 of 16)	intron (NM_001113411, intron 4 of 16)	57657	NM_001350794	55277	Hs.444301	NM_018291	ENSG00000172456	FGGY	-	FGGY carbohydrate kinase domain containing	protein-coding
1974	UPN1974	chr1	59368183	59368864	chr1:59368183-59368864	1	1	1	0		0		1974	chr1	59368183	59368864	+	0		intron (NM_001113411, intron 4 of 16)	MIRb|SINE|MIR	58445	NM_001350794	55277	Hs.444301	NM_018291	ENSG00000172456	FGGY	-	FGGY carbohydrate kinase domain containing	protein-coding
1985	UPN1985	chr1	59672842	59674392	chr1:59672842-59674392	1	1	1	0		0		1985	chr1	59672842	59674392	+	0		intron (NM_001350794, intron 13 of 14)	intron (NM_001350794, intron 13 of 14)	59679	NR_039861	100616409		NR_039861	ENSG00000266150	MIR4711	-	microRNA 4711	ncRNA
1990	UPN1990	chr1	59705835	59707117	chr1:59705835-59707117	1	1	1	0		0		1990	chr1	59705835	59707117	+	0		intron (NM_001113411, intron 15 of 16)	intron (NM_001113411, intron 15 of 16)	26820	NR_039861	100616409		NR_039861	ENSG00000266150	MIR4711	-	microRNA 4711	ncRNA
1991	UPN1991	chr1	59730550	59732238	chr1:59730550-59732238	1	2	1	0		0		1991	chr1	59730550	59732238	+	0		intron (NM_001113411, intron 15 of 16)	intron (NM_001113411, intron 15 of 16)	1902	NR_039861	100616409		NR_039861	ENSG00000266150	MIR4711	-	microRNA 4711	ncRNA
1998	UPN1998	chr1	61079957	61082049	chr1:61079957-61082049	1	1	1	0		0		1998	chr1	61079957	61082049	+	0		promoter-TSS (NM_001145512)	promoter-TSS (NM_001145512)	-859	NM_001145512	4774	Hs.740757	NM_005595	ENSG00000162599	NFIA	BRMUTD|CTF|NF-I/A|NF1-A|NFI-A|NFI-L	nuclear factor I A	protein-coding
2011	UPN2011	chr1	62435309	62436029	chr1:62435309-62436029	1	1	1	0		0		2011	chr1	62435309	62436029	+	0		promoter-TSS (NM_001017416)	promoter-TSS (NM_001017416)	-635	NM_001017415	7398	Hs.35086	NM_003368	ENSG00000162607	USP1	UBP	ubiquitin specific peptidase 1	protein-coding
2029	UPN2029	chr1	64897673	64898951	chr1:64897673-64898951	2	1	1	0		0		2029	chr1	64897673	64898951	+	0		intron (NM_001321852, intron 1 of 24)	intron (NM_001321852, intron 1 of 24)	68257	NM_002227	3716	Hs.207538	NM_002227	ENSG00000162434	JAK1	JAK1A|JAK1B|JTK3	Janus kinase 1	protein-coding
2031	UPN2031	chr1	64933242	64935131	chr1:64933242-64935131	1	1	1	0		0		2031	chr1	64933242	64935131	+	0		intron (NM_001321852, intron 1 of 24)	intron (NM_001321852, intron 1 of 24)	32383	NM_002227	3716	Hs.207538	NM_002227	ENSG00000162434	JAK1	JAK1A|JAK1B|JTK3	Janus kinase 1	protein-coding
2034	UPN2034	chr1	65001037	65002908	chr1:65001037-65002908	1	1	1	0		0		2034	chr1	65001037	65002908	+	0		intron (NR_119383, intron 1 of 6)	intron (NR_119383, intron 1 of 6)	504	NR_119383	101927084	Hs.734218	NR_119383	ENSG00000226891	LINC01359	-	long intergenic non-protein coding RNA 1359	ncRNA
2035	UPN2035	chr1	65065184	65066736	chr1:65065184-65066736	1	1	1	0		0		2035	chr1	65065184	65066736	+	0		intron (NM_001321853, intron 2 of 26)	intron (NM_001321853, intron 2 of 26)	1786	NM_001321852	3716	Hs.207538	NM_002227	ENSG00000162434	JAK1	JAK1A|JAK1B|JTK3	Janus kinase 1	protein-coding
2050	UPN2050	chr1	66269285	66273359	chr1:66269285-66273359	2	2	1	0		0		2050	chr1	66269285	66273359	+	0		intron (NM_001037340, intron 5 of 14)	intron (NM_001037340, intron 5 of 14)	-60786	NM_001037339	5142	Hs.198072	NM_002600	ENSG00000184588	PDE4B	DPDE4|PDEIVB	phosphodiesterase 4B	protein-coding
2054	UPN2054	chr1	66315949	66317869	chr1:66315949-66317869	1	2	1	0		0		2054	chr1	66315949	66317869	+	0		intron (NM_001037340, intron 5 of 14)	intron (NM_001037340, intron 5 of 14)	-15199	NM_001037339	5142	Hs.198072	NM_002600	ENSG00000184588	PDE4B	DPDE4|PDEIVB	phosphodiesterase 4B	protein-coding
2055	UPN2055	chr1	66328268	66331479	chr1:66328268-66331479	2	1	1	0		0		2055	chr1	66328268	66331479	+	0		intron (NM_001037340, intron 5 of 14)	intron (NM_001037340, intron 5 of 14)	-2235	NM_001037339	5142	Hs.198072	NM_002600	ENSG00000184588	PDE4B	DPDE4|PDEIVB	phosphodiesterase 4B	protein-coding
2056	UPN2056	chr1	66334306	66335732	chr1:66334306-66335732	1	1	2	0		0		2056	chr1	66334306	66335732	+	0		intron (NM_001037339, intron 1 of 9)	intron (NM_001037339, intron 1 of 9)	2911	NM_001037339	5142	Hs.198072	NM_002600	ENSG00000184588	PDE4B	DPDE4|PDEIVB	phosphodiesterase 4B	protein-coding
2057	UPN2057	chr1	66336181	66338691	chr1:66336181-66338691	1	1	1	0		0		2057	chr1	66336181	66338691	+	0		intron (NM_001037339, intron 1 of 9)	intron (NM_001037339, intron 1 of 9)	5328	NM_001037339	5142	Hs.198072	NM_002600	ENSG00000184588	PDE4B	DPDE4|PDEIVB	phosphodiesterase 4B	protein-coding
2059	UPN2059	chr1	66349139	66353035	chr1:66349139-66353035	1	2	1	0		0		2059	chr1	66349139	66353035	+	0		intron (NM_001037339, intron 1 of 9)	intron (NM_001037339, intron 1 of 9)	-3291	NM_001297442	5142	Hs.198072	NM_002600	ENSG00000184588	PDE4B	DPDE4|PDEIVB	phosphodiesterase 4B	protein-coding
2063	UPN2063	chr1	66370298	66374936	chr1:66370298-66374936	2	1	1	0		0		2063	chr1	66370298	66374936	+	0		exon (NM_001297442, exon 10 of 10)	exon (NM_001297442, exon 10 of 10)	18239	NM_001297442	5142	Hs.198072	NM_002600	ENSG00000184588	PDE4B	DPDE4|PDEIVB	phosphodiesterase 4B	protein-coding
2068	UPN2068	chr1	66532764	66533345	chr1:66532764-66533345	1	1	1	0		0		2068	chr1	66532764	66533345	+	0		promoter-TSS (NM_001350218)	promoter-TSS (NM_001350218)	-515	NM_001308203	84251	Hs.132121	NM_032291	ENSG00000118473	SGIP1	-	SH3 domain GRB2 like endophilin interacting protein 1	protein-coding
2070	UPN2070	chr1	66562772	66564809	chr1:66562772-66564809	1	1	1	0		0		2070	chr1	66562772	66564809	+	0		intron (NM_001308203, intron 2 of 21)	intron (NM_001308203, intron 2 of 21)	29834	NM_001350217	84251	Hs.132121	NM_032291	ENSG00000118473	SGIP1	-	SH3 domain GRB2 like endophilin interacting protein 1	protein-coding
2074	UPN2074	chr1	66925485	66926246	chr1:66925485-66926246	1	1	1	0		0		2074	chr1	66925485	66926246	+	0		promoter-TSS (NM_024763)	promoter-TSS (NM_024763)	970	NM_001146111	57708	Hs.605432	NM_020948	ENSG00000198160	MIER1	ER1|MI-ER1	MIER1 transcriptional regulator	protein-coding
2080	UPN2080	chr1	67558892	67560006	chr1:67558892-67560006	1	1	1	0		0		2080	chr1	67558892	67560006	+	0		Intergenic	Intergenic	-125728	NM_001199741	1647	Hs.80409	NM_001924	ENSG00000116717	GADD45A	DDIT1|GADD45	growth arrest and DNA damage inducible alpha	protein-coding
2082	UPN2082	chr1	67563839	67564952	chr1:67563839-67564952	1	1	1	0		0		2082	chr1	67563839	67564952	+	0		Intergenic	Intergenic	-120782	NM_001199741	1647	Hs.80409	NM_001924	ENSG00000116717	GADD45A	DDIT1|GADD45	growth arrest and DNA damage inducible alpha	protein-coding
2095	UPN2095	chr1	67735443	67736920	chr1:67735443-67736920	1	1	1	0		0		2095	chr1	67735443	67736920	+	0		intron (NM_018841, intron 2 of 3)	intron (NM_018841, intron 2 of 3)	51004	NM_001199742	1647	Hs.80409	NM_001924	ENSG00000116717	GADD45A	DDIT1|GADD45	growth arrest and DNA damage inducible alpha	protein-coding
2096	UPN2096	chr1	67747543	67750697	chr1:67747543-67750697	1	2	2	0		0		2096	chr1	67747543	67750697	+	0		intron (NM_018841, intron 2 of 3)	intron (NM_018841, intron 2 of 3)	63943	NM_001199742	1647	Hs.80409	NM_001924	ENSG00000116717	GADD45A	DDIT1|GADD45	growth arrest and DNA damage inducible alpha	protein-coding
2101	UPN2101	chr1	68173875	68174930	chr1:68173875-68174930	1	1	2	0		0		2101	chr1	68173875	68174930	+	0		intron (NM_001193334, intron 1 of 10)	intron (NM_001193334, intron 1 of 10)	9208	NR_031664	100302279		NR_031664	ENSG00000221203	MIR1262	MIRN1262|hsa-mir-1262|mir-1262	microRNA 1262	ncRNA
2115	UPN2115	chr1	76074775	76075851	chr1:76074775-76075851	1	1	1	0		0		2115	chr1	76074775	76075851	+	0		intron (NM_001349108, intron 1 of 3)	intron (NM_001349108, intron 1 of 3)	629	NM_001349105	256435	Hs.337040	NM_152996	ENSG00000184005	ST6GALNAC3	PRO7177|SIAT7C|ST6GALNACIII|STY	ST6 N-acetylgalactosaminide alpha-2,6-sialyltransferase 3	protein-coding
2121	UPN2121	chr1	77833461	77834647	chr1:77833461-77834647	1	1	1	0		0		2121	chr1	77833461	77834647	+	0		intron (NM_198549, intron 7 of 15)	intron (NM_198549, intron 7 of 15)	54430	NM_198549	374986	Hs.437755	NM_198549	ENSG00000180488	MIGA1	FAM73A	mitoguardin 1	protein-coding
2122	UPN2122	chr1	77888138	77889005	chr1:77888138-77889005	1	1	1	0		0		2122	chr1	77888138	77889005	+	0		promoter-TSS (NM_144573)	promoter-TSS (NM_144573)	56	NM_001172309	91624	Hs.612385	NM_144573	ENSG00000162614	NEXN	CMH20|NELIN	nexilin F-actin binding protein	protein-coding
2150	UPN2150	chr1	85298035	85298956	chr1:85298035-85298956	1	1	1	0		0		2150	chr1	85298035	85298956	+	0		Intergenic	Intergenic	-21591	NM_001320715	8915	Hs.193516	NM_003921	ENSG00000142867	BCL10	CARMEN|CIPER|CLAP|IMD37|c-E10|mE10	B cell CLL/lymphoma 10	protein-coding
2151	UPN2151	chr1	85313428	85315114	chr1:85313428-85315114	1	1	1	0		0		2151	chr1	85313428	85315114	+	0		Intergenic	Intergenic	-37367	NM_001320715	8915	Hs.193516	NM_003921	ENSG00000142867	BCL10	CARMEN|CIPER|CLAP|IMD37|c-E10|mE10	B cell CLL/lymphoma 10	protein-coding
2153	UPN2153	chr1	85328201	85331195	chr1:85328201-85331195	2	3	1	0		0		2153	chr1	85328201	85331195	+	0		intron (NM_012137, intron 4 of 5)	intron (NM_012137, intron 4 of 5)	-52794	NM_001320715	8915	Hs.193516	NM_003921	ENSG00000142867	BCL10	CARMEN|CIPER|CLAP|IMD37|c-E10|mE10	B cell CLL/lymphoma 10	protein-coding
2154	UPN2154	chr1	85331562	85333173	chr1:85331562-85333173	1	1	1	0		0		2154	chr1	85331562	85333173	+	0		intron (NM_012137, intron 4 of 5)	L1M2|LINE|L1	-55463	NM_001320715	8915	Hs.193516	NM_003921	ENSG00000142867	BCL10	CARMEN|CIPER|CLAP|IMD37|c-E10|mE10	B cell CLL/lymphoma 10	protein-coding
2163	UPN2163	chr1	85578965	85580268	chr1:85578965-85580268	1	1	1	0		0		2163	chr1	85578965	85580268	+	0		Intergenic	Intergenic	-1145	NM_001554	3491	Hs.8867	NM_001554	ENSG00000142871	CYR61	CCN1|GIG1|IGFBP10	cysteine rich angiogenic inducer 61	protein-coding
2168	UPN2168	chr1	86395156	86395788	chr1:86395156-86395788	1	1	1	0		0		2168	chr1	86395156	86395788	+	0		intron (NM_001184765, intron 1 of 16)	MIRb|SINE|MIR	870	NM_001007022	57489	Hs.149360	NM_020729	ENSG00000122417	ODF2L	dJ977L11.1	outer dense fiber of sperm tails 2 like	protein-coding
2174	UPN2174	chr1	86773667	86774432	chr1:86773667-86774432	1	1	1	0		0		2174	chr1	86773667	86774432	+	0		Intergenic	Intergenic	69479	NM_016009	51100	Hs.136309	NM_016009	ENSG00000097033	SH3GLB1	Bif-1|CGI-61|PPP1R70|dJ612B15.2	SH3 domain containing GRB2 like, endophilin B1	protein-coding
2175	UPN2175	chr1	86774666	86775660	chr1:86774666-86775660	1	1	1	0		0		2175	chr1	86774666	86775660	+	0		Intergenic	MIRb|SINE|MIR	70593	NM_016009	51100	Hs.136309	NM_016009	ENSG00000097033	SH3GLB1	Bif-1|CGI-61|PPP1R70|dJ612B15.2	SH3 domain containing GRB2 like, endophilin B1	protein-coding
2177	UPN2177	chr1	86792627	86793137	chr1:86792627-86793137	1	1	1	0		0		2177	chr1	86792627	86793137	+	0		Intergenic	Intergenic	88312	NM_016009	51100	Hs.136309	NM_016009	ENSG00000097033	SH3GLB1	Bif-1|CGI-61|PPP1R70|dJ612B15.2	SH3 domain containing GRB2 like, endophilin B1	protein-coding
2189	UPN2189	chr1	88991387	88991939	chr1:88991387-88991939	1	1	1	0		0		2189	chr1	88991387	88991939	+	0		intron (NM_001008661, intron 1 of 13)	intron (NM_001008661, intron 1 of 13)	1085	NR_146185	56267	Hs.481898	NM_001008661	ENSG00000137944	KYAT3	CCBL2|KAT3|KATIII	kynurenine aminotransferase 3	protein-coding
2193	UPN2193	chr1	89126432	89127304	chr1:89126432-89127304	1	1	1	0		0		2193	chr1	89126432	89127304	+	0		promoter-TSS (NM_004120)	promoter-TSS (NM_004120)	-709	NM_004120	2634	Hs.386567	NM_004120	ENSG00000162645	GBP2	-	guanylate binding protein 2	protein-coding
2194	UPN2194	chr1	89128203	89129852	chr1:89128203-89129852	1	2	2	0		0		2194	chr1	89128203	89129852	+	0		Intergenic	Intergenic	-2868	NM_004120	2634	Hs.386567	NM_004120	ENSG00000162645	GBP2	-	guanylate binding protein 2	protein-coding
2214	UPN2214	chr1	89723970	89725455	chr1:89723970-89725455	1	1	1	0		0		2214	chr1	89723970	89725455	+	0		Intergenic	Intergenic	91627	NM_032270	84230	Hs.412836	NM_032270	ENSG00000171488	LRRC8C	AD158|FAD158	leucine rich repeat containing 8 VRAC subunit C	protein-coding
2217	UPN2217	chr1	89754752	89759659	chr1:89754752-89759659	3	1	2	0		0		2217	chr1	89754752	89759659	+	0		Intergenic	Intergenic	-63809	NM_001134479	55144	Hs.482087	NM_018103	ENSG00000171492	LRRC8D	LRRC5	leucine rich repeat containing 8 VRAC subunit D	protein-coding
2222	UPN2222	chr1	89903820	89904919	chr1:89903820-89904919	1	1	1	0		0		2222	chr1	89903820	89904919	+	0		intron (NM_001134479, intron 2 of 2)	intron (NM_001134479, intron 2 of 2)	82448	NM_018103	55144	Hs.482087	NM_018103	ENSG00000171492	LRRC8D	LRRC5	leucine rich repeat containing 8 VRAC subunit D	protein-coding
2228	UPN2228	chr1	91022341	91022801	chr1:91022341-91022801	1	1	1	0		0		2228	chr1	91022341	91022801	+	0		promoter-TSS (NM_032186)	promoter-TSS (NM_032186)	-316	NM_201269	84146	Hs.173001	NM_016620	ENSG00000122482	ZNF644	BM-005|MYP21|NatF|ZEP-2	zinc finger protein 644	protein-coding
2230	UPN2230	chr1	91121153	91121673	chr1:91121153-91121673	1	1	1	0		0		2230	chr1	91121153	91121673	+	0		Intergenic	Intergenic	-99158	NM_201269	84146	Hs.173001	NM_016620	ENSG00000122482	ZNF644	BM-005|MYP21|NatF|ZEP-2	zinc finger protein 644	protein-coding
2235	UPN2235	chr1	91569221	91572456	chr1:91569221-91572456	2	2	1	0		0		2235	chr1	91569221	91572456	+	0		Intergenic	FLAM_A|SINE|Alu	69730	NM_001134420	8317	Hs.533573	NM_003503	ENSG00000097046	CDC7	CDC7L1|HsCDC7|Hsk1|huCDC7	cell division cycle 7	protein-coding
2236	UPN2236	chr1	91582102	91582596	chr1:91582102-91582596	1	1	1	0		0		2236	chr1	91582102	91582596	+	0		Intergenic	Intergenic	81241	NM_001134420	8317	Hs.533573	NM_003503	ENSG00000097046	CDC7	CDC7L1|HsCDC7|Hsk1|huCDC7	cell division cycle 7	protein-coding
2239	UPN2239	chr1	91584716	91586189	chr1:91584716-91586189	1	1	1	0		0		2239	chr1	91584716	91586189	+	0		Intergenic	Intergenic	84344	NM_001134420	8317	Hs.533573	NM_003503	ENSG00000097046	CDC7	CDC7L1|HsCDC7|Hsk1|huCDC7	cell division cycle 7	protein-coding
2240	UPN2240	chr1	91650663	91651724	chr1:91650663-91651724	1	1	2	0		0		2240	chr1	91650663	91651724	+	0		Intergenic	Intergenic	150085	NM_001134420	8317	Hs.533573	NM_003503	ENSG00000097046	CDC7	CDC7L1|HsCDC7|Hsk1|huCDC7	cell division cycle 7	protein-coding
2243	UPN2243	chr1	91712622	91713759	chr1:91712622-91713759	1	1	1	0		0		2243	chr1	91712622	91713759	+	0		intron (NM_001195684, intron 13 of 17)	MER121|DNA|hAT?	173089	NM_001195683	7049	Hs.482390	NM_003243	ENSG00000069702	TGFBR3	BGCAN|betaglycan	transforming growth factor beta receptor 3	protein-coding
2247	UPN2247	chr1	91730859	91732703	chr1:91730859-91732703	2	1	2	0		0		2247	chr1	91730859	91732703	+	0		intron (NM_001195684, intron 6 of 17)	intron (NM_001195684, intron 6 of 17)	154498	NM_001195683	7049	Hs.482390	NM_003243	ENSG00000069702	TGFBR3	BGCAN|betaglycan	transforming growth factor beta receptor 3	protein-coding
2250	UPN2250	chr1	91736488	91737876	chr1:91736488-91737876	1	1	1	0		0		2250	chr1	91736488	91737876	+	0		intron (NM_001195684, intron 5 of 17)	intron (NM_001195684, intron 5 of 17)	149097	NM_001195683	7049	Hs.482390	NM_003243	ENSG00000069702	TGFBR3	BGCAN|betaglycan	transforming growth factor beta receptor 3	protein-coding
2251	UPN2251	chr1	91754631	91755270	chr1:91754631-91755270	1	1	1	0		0		2251	chr1	91754631	91755270	+	0		intron (NM_001195684, intron 5 of 17)	intron (NM_001195684, intron 5 of 17)	131329	NM_001195683	7049	Hs.482390	NM_003243	ENSG00000069702	TGFBR3	BGCAN|betaglycan	transforming growth factor beta receptor 3	protein-coding
2252	UPN2252	chr1	91782091	91782464	chr1:91782091-91782464	1	1	1	0		0		2252	chr1	91782091	91782464	+	0		intron (NM_001195684, intron 4 of 17)	intron (NM_001195684, intron 4 of 17)	104002	NM_001195683	7049	Hs.482390	NM_003243	ENSG00000069702	TGFBR3	BGCAN|betaglycan	transforming growth factor beta receptor 3	protein-coding
2255	UPN2255	chr1	91803274	91805096	chr1:91803274-91805096	1	1	1	0		0		2255	chr1	91803274	91805096	+	0		intron (NR_036634, intron 2 of 17)	intron (NR_036634, intron 2 of 17)	82094	NM_001195683	7049	Hs.482390	NM_003243	ENSG00000069702	TGFBR3	BGCAN|betaglycan	transforming growth factor beta receptor 3	protein-coding
2256	UPN2256	chr1	91817241	91819070	chr1:91817241-91819070	1	2	1	0		0		2256	chr1	91817241	91819070	+	0		intron (NR_036634, intron 2 of 17)	intron (NR_036634, intron 2 of 17)	68124	NM_001195683	7049	Hs.482390	NM_003243	ENSG00000069702	TGFBR3	BGCAN|betaglycan	transforming growth factor beta receptor 3	protein-coding
2257	UPN2257	chr1	91828667	91831654	chr1:91828667-91831654	2	1	1	0		0		2257	chr1	91828667	91831654	+	0		intron (NR_036634, intron 2 of 17)	intron (NR_036634, intron 2 of 17)	56119	NM_001195683	7049	Hs.482390	NM_003243	ENSG00000069702	TGFBR3	BGCAN|betaglycan	transforming growth factor beta receptor 3	protein-coding
2265	UPN2265	chr1	92484273	92487155	chr1:92484273-92487155	1	1	1	0		0		2265	chr1	92484273	92487155	+	0		intron (NM_005263, intron 1 of 6)	CpG-1333	386	NM_001127216	2672	Hs.73172	NM_005263	ENSG00000162676	GFI1	GFI-1|GFI1A|SCN2|ZNF163	growth factor independent 1 transcriptional repressor	protein-coding
2269	UPN2269	chr1	93566060	93567544	chr1:93566060-93567544	1	1	1	0		0		2269	chr1	93566060	93567544	+	0		intron (NM_003567, intron 11 of 11)	AluSz|SINE|Alu	18360	NM_001308251	8412	Hs.36958	NM_003567	ENSG00000137936	BCAR3	AND-34|NSP2|SH2D3B	BCAR3, NSP family adaptor protein	protein-coding
2270	UPN2270	chr1	93579110	93580045	chr1:93579110-93580045	1	1	1	0		0		2270	chr1	93579110	93580045	+	0		intron (NM_003567, intron 7 of 11)	intron (NM_003567, intron 7 of 11)	5585	NM_001308251	8412	Hs.36958	NM_003567	ENSG00000137936	BCAR3	AND-34|NSP2|SH2D3B	BCAR3, NSP family adaptor protein	protein-coding
2273	UPN2273	chr1	93615235	93617537	chr1:93615235-93617537	2	1	1	0		0		2273	chr1	93615235	93617537	+	0		intron (NM_003567, intron 3 of 11)	intron (NM_003567, intron 3 of 11)	-2241	NM_001261410	8412	Hs.36958	NM_003567	ENSG00000137936	BCAR3	AND-34|NSP2|SH2D3B	BCAR3, NSP family adaptor protein	protein-coding
2288	UPN2288	chr1	94044271	94045287	chr1:94044271-94045287	1	1	1	0		0		2288	chr1	94044271	94045287	+	0		intron (NM_000350, intron 19 of 49)	intron (NM_000350, intron 19 of 49)	76370	NM_000350	24	Hs.416707	NM_000350	ENSG00000198691	ABCA4	ABC10|ABCR|ARMD2|CORD3|FFM|RMP|RP19|STGD|STGD1	ATP binding cassette subfamily A member 4	protein-coding
2290	UPN2290	chr1	94047320	94048271	chr1:94047320-94048271	1	1	1	0		0		2290	chr1	94047320	94048271	+	0		intron (NM_000350, intron 18 of 49)	(CCCCATC)n|Simple_repeat|Simple_repeat	73354	NM_000350	24	Hs.416707	NM_000350	ENSG00000198691	ABCA4	ABC10|ABCR|ARMD2|CORD3|FFM|RMP|RP19|STGD|STGD1	ATP binding cassette subfamily A member 4	protein-coding
2293	UPN2293	chr1	94068126	94069841	chr1:94068126-94069841	1	1	1	0		0		2293	chr1	94068126	94069841	+	0		intron (NM_000350, intron 11 of 49)	intron (NM_000350, intron 11 of 49)	52166	NM_000350	24	Hs.416707	NM_000350	ENSG00000198691	ABCA4	ABC10|ABCR|ARMD2|CORD3|FFM|RMP|RP19|STGD|STGD1	ATP binding cassette subfamily A member 4	protein-coding
2296	UPN2296	chr1	94091642	94097323	chr1:94091642-94097323	1	1	1	0		0		2296	chr1	94091642	94097323	+	0		intron (NM_000350, intron 6 of 49)	intron (NM_000350, intron 6 of 49)	26667	NM_000350	24	Hs.416707	NM_000350	ENSG00000198691	ABCA4	ABC10|ABCR|ARMD2|CORD3|FFM|RMP|RP19|STGD|STGD1	ATP binding cassette subfamily A member 4	protein-coding
2297	UPN2297	chr1	94100330	94101954	chr1:94100330-94101954	1	1	2	0		0		2297	chr1	94100330	94101954	+	0		intron (NM_000350, intron 5 of 49)	intron (NM_000350, intron 5 of 49)	20007	NM_000350	24	Hs.416707	NM_000350	ENSG00000198691	ABCA4	ABC10|ABCR|ARMD2|CORD3|FFM|RMP|RP19|STGD|STGD1	ATP binding cassette subfamily A member 4	protein-coding
2300	UPN2300	chr1	94299615	94300377	chr1:94299615-94300377	1	1	1	0		0		2300	chr1	94299615	94300377	+	0		Intergenic	Intergenic	-52236	NM_001328665	9411	Hs.483238	NM_004815	ENSG00000137962	ARHGAP29	PARG1	Rho GTPase activating protein 29	protein-coding
2302	UPN2302	chr1	94325291	94325669	chr1:94325291-94325669	1	1	1	0		0		2302	chr1	94325291	94325669	+	0		Intergenic	L4_A_Mam|LINE|RTE-X	-77720	NM_001328665	9411	Hs.483238	NM_004815	ENSG00000137962	ARHGAP29	PARG1	Rho GTPase activating protein 29	protein-coding
2303	UPN2303	chr1	94326529	94327472	chr1:94326529-94327472	1	1	1	0		0		2303	chr1	94326529	94327472	+	0		Intergenic	Intergenic	-79240	NM_001328665	9411	Hs.483238	NM_004815	ENSG00000137962	ARHGAP29	PARG1	Rho GTPase activating protein 29	protein-coding
2306	UPN2306	chr1	94541313	94543072	chr1:94541313-94543072	1	1	1	0		0		2306	chr1	94541313	94543072	+	0		promoter-TSS (NM_001993)	promoter-TSS (NM_001993)	-335	NM_001178096	2152	Hs.62192	NM_001993	ENSG00000117525	F3	CD142|TF|TFA	coagulation factor III, tissue factor	protein-coding
2308	UPN2308	chr1	94707466	94707762	chr1:94707466-94707762	1	1	1	0		0		2308	chr1	94707466	94707762	+	0		intron (NR_104131, intron 2 of 4)	intron (NR_104131, intron 2 of 4)	38286	NR_039620	100616321		NR_039620	ENSG00000263526	MIR378G	-	microRNA 378g	ncRNA
2310	UPN2310	chr1	94713016	94714538	chr1:94713016-94714538	1	2	1	0		0		2310	chr1	94713016	94714538	+	0		intron (NR_104131, intron 2 of 4)	intron (NR_104131, intron 2 of 4)	32123	NR_039620	100616321		NR_039620	ENSG00000263526	MIR378G	-	microRNA 378g	ncRNA
2315	UPN2315	chr1	94792523	94793843	chr1:94792523-94793843	1	1	1	0		0		2315	chr1	94792523	94793843	+	0		intron (NR_104131, intron 1 of 4)	intron (NR_104131, intron 1 of 4)	27098	NR_104131	101928079	Hs.596857	NR_104131	ENSG00000224081	SLC44A3-AS1	LINC01057|XLOC_000303	SLC44A3 antisense RNA 1	ncRNA
2320	UPN2320	chr1	94862356	94866531	chr1:94862356-94866531	4	1	2	0		0		2320	chr1	94862356	94866531	+	0		intron (NM_001114106, intron 10 of 14)	intron (NM_001114106, intron 10 of 14)	39950	NM_001350223	126969	Hs.483423	NM_152369	ENSG00000143036	SLC44A3	CTL3	solute carrier family 44 member 3	protein-coding
2321	UPN2321	chr1	94867168	94867498	chr1:94867168-94867498	1	1	1	0		0		2321	chr1	94867168	94867498	+	0		non-coding (NR_146575, exon 12 of 15)	non-coding (NR_146575, exon 12 of 15)	42840	NM_001350223	126969	Hs.483423	NM_152369	ENSG00000143036	SLC44A3	CTL3	solute carrier family 44 member 3	protein-coding
2325	UPN2325	chr1	94927488	94928354	chr1:94927488-94928354	1	1	1	0		0		2325	chr1	94927488	94928354	+	0		promoter-TSS (NR_033998)	promoter-TSS (NR_033998)	-107	NR_033998	729970	Hs.297988	NR_033998	ENSG00000235501	LOC729970	-	hCG2028352-like	ncRNA
2360	UPN2360	chr1	100626479	100629954	chr1:100626479-100629954	1	1	1	0		0		2360	chr1	100626479	100629954	+	0		intron (NR_038914, intron 4 of 4)	intron (NR_038914, intron 4 of 4)	18788	NR_038914	100128787	Hs.536050	NR_038914		LINC01349	-	long intergenic non-protein coding RNA 1349	ncRNA
2399	UPN2399	chr1	108560487	108561382	chr1:108560487-108561382	1	1	1	0		0		2399	chr1	108560487	108561382	+	0		intron (NM_001010883, intron 1 of 10)	intron (NM_001010883, intron 1 of 10)	585	NM_001010883	284611	Hs.200230	NM_001010883	ENSG00000162636	FAM102B	SYM-3B	family with sequence similarity 102 member B	protein-coding
2403	UPN2403	chr1	108589542	108591058	chr1:108589542-108591058	1	1	1	0		0		2403	chr1	108589542	108591058	+	0		intron (NM_001010883, intron 1 of 10)	intron (NM_001010883, intron 1 of 10)	29951	NM_001010883	284611	Hs.200230	NM_001010883	ENSG00000162636	FAM102B	SYM-3B	family with sequence similarity 102 member B	protein-coding
2404	UPN2404	chr1	108591216	108592889	chr1:108591216-108592889	1	1	1	0		0		2404	chr1	108591216	108592889	+	0		intron (NM_001010883, intron 1 of 10)	L2|LINE|L2	31703	NM_001010883	284611	Hs.200230	NM_001010883	ENSG00000162636	FAM102B	SYM-3B	family with sequence similarity 102 member B	protein-coding
2406	UPN2406	chr1	108644810	108648135	chr1:108644810-108648135	1	1	1	0		0		2406	chr1	108644810	108648135	+	0		Intergenic	MLT1J|LTR|ERVL-MaLR	14650	NM_001102592	113802	Hs.7962	NM_144584	ENSG00000162639	HENMT1	C1orf59|HEN1	HEN methyltransferase 1	protein-coding
2407	UPN2407	chr1	108661262	108661938	chr1:108661262-108661938	1	1	1	0		0		2407	chr1	108661262	108661938	+	0		promoter-TSS (NM_144584)	promoter-TSS (NM_144584)	-74	NM_144584	113802	Hs.7962	NM_144584	ENSG00000162639	HENMT1	C1orf59|HEN1	HEN methyltransferase 1	protein-coding
2412	UPN2412	chr1	108829762	108831039	chr1:108829762-108831039	1	1	1	0		0		2412	chr1	108829762	108831039	+	0		intron (NM_152763, intron 10 of 15)	intron (NM_152763, intron 10 of 15)	26704	NM_152763	254268	Hs.729441	NM_152763	ENSG00000162641	AKNAD1	C1orf62	AKNA domain containing 1	protein-coding
2414	UPN2414	chr1	109076215	109077002	chr1:109076215-109077002	1	1	1	0		0		2414	chr1	109076215	109077002	+	0		promoter-TSS (NM_005645)	promoter-TSS (NM_005645)	-606	NM_005645	6884	Hs.632426	NM_005645	ENSG00000197780	TAF13	MRT60|TAF(II)18|TAF2K|TAFII-18|TAFII18	TATA-box binding protein associated factor 13	protein-coding
2424	UPN2424	chr1	109253659	109254956	chr1:109253659-109254956	1	1	1	0		0		2424	chr1	109253659	109254956	+	0		intron (NM_001408, intron 1 of 33)	intron (NM_001408, intron 1 of 33)	4288	NM_001408	1952	Hs.57652	NM_001408	ENSG00000143126	CELSR2	ADGRC2|CDHF10|EGFL2|Flamingo1|MEGF3	cadherin EGF LAG seven-pass G-type receptor 2	protein-coding
2427	UPN2427	chr1	109368507	109370047	chr1:109368507-109370047	1	1	1	0		0		2427	chr1	109368507	109370047	+	0		intron (NM_001205228, intron 2 of 19)	AluSq2|SINE|Alu	24080	NM_001205228	6272	Hs.485195	NM_002959	ENSG00000134243	SORT1	Gp95|LDLCQ6|NT3|NTR3	sortilin 1	protein-coding
2428	UPN2428	chr1	109370591	109373914	chr1:109370591-109373914	1	1	1	0		0		2428	chr1	109370591	109373914	+	0		intron (NM_002959, intron 1 of 19)	intron (NM_002959, intron 1 of 19)	21105	NM_001205228	6272	Hs.485195	NM_002959	ENSG00000134243	SORT1	Gp95|LDLCQ6|NT3|NTR3	sortilin 1	protein-coding
2432	UPN2432	chr1	109390992	109396955	chr1:109390992-109396955	3	3	2	0		0		2432	chr1	109390992	109396955	+	0		promoter-TSS (NM_001205228)	promoter-TSS (NM_001205228)	-616	NM_001205228	6272	Hs.485195	NM_002959	ENSG00000134243	SORT1	Gp95|LDLCQ6|NT3|NTR3	sortilin 1	protein-coding
2440	UPN2440	chr1	109546509	109548266	chr1:109546509-109548266	1	1	1	0		0		2440	chr1	109546509	109548266	+	0		Intergenic	Intergenic	-1177	NM_006496	2773	Hs.73799	NM_006496	ENSG00000065135	GNAI3	87U6|ARCND1	G protein subunit alpha i3	protein-coding
2442	UPN2442	chr1	109615880	109617966	chr1:109615880-109617966	1	1	1	0		0		2442	chr1	109615880	109617966	+	0		Intergenic	Intergenic	-2890	NM_001257360	271	Hs.82927	NM_004037	ENSG00000116337	AMPD2	PCH9|SPG63	adenosine monophosphate deaminase 2	protein-coding
2443	UPN2443	chr1	109618606	109624142	chr1:109618606-109624142	2	2	2	0		0		2443	chr1	109618606	109624142	+	0		intron (NM_001308170, intron 1 of 16)	intron (NM_001308170, intron 1 of 16)	460	NM_001308170	271	Hs.82927	NM_004037	ENSG00000116337	AMPD2	PCH9|SPG63	adenosine monophosphate deaminase 2	protein-coding
2451	UPN2451	chr1	109763286	109764370	chr1:109763286-109764370	1	1	1	0		0		2451	chr1	109763286	109764370	+	0		5' UTR (NM_139053, exon 1 of 19)	5' UTR (NM_139053, exon 1 of 19)	194	NM_001319952	79574	Hs.485352	NM_024526	ENSG00000198758	EPS8L3	EPS8R3	EPS8 like 3	protein-coding
2457	UPN2457	chr1	109792451	109795158	chr1:109792451-109795158	1	1	2	0		0		2457	chr1	109792451	109795158	+	0		Intergenic	Intergenic	-29782	NM_024526	79574	Hs.485352	NM_024526	ENSG00000198758	EPS8L3	EPS8R3	EPS8 like 3	protein-coding
2462	UPN2462	chr1	109863995	109865397	chr1:109863995-109865397	1	1	2	0		0		2462	chr1	109863995	109865397	+	0		Intergenic	Intergenic	-45915	NM_172211	1435	Hs.173894	NM_000757	ENSG00000184371	CSF1	CSF-1|MCSF	colony stimulating factor 1	protein-coding
2465	UPN2465	chr1	109876656	109877905	chr1:109876656-109877905	1	1	1	0		0		2465	chr1	109876656	109877905	+	0		Intergenic	Intergenic	-33331	NM_172211	1435	Hs.173894	NM_000757	ENSG00000184371	CSF1	CSF-1|MCSF	colony stimulating factor 1	protein-coding
2471	UPN2471	chr1	109895524	109896752	chr1:109895524-109896752	1	1	1	0		0		2471	chr1	109895524	109896752	+	0		Intergenic	Intergenic	-14473	NM_172211	1435	Hs.173894	NM_000757	ENSG00000184371	CSF1	CSF-1|MCSF	colony stimulating factor 1	protein-coding
2474	UPN2474	chr1	109911220	109913712	chr1:109911220-109913712	1	1	1	0		0		2474	chr1	109911220	109913712	+	0		intron (NM_000757, intron 1 of 8)	intron (NM_000757, intron 1 of 8)	1855	NM_000757	1435	Hs.173894	NM_000757	ENSG00000184371	CSF1	CSF-1|MCSF	colony stimulating factor 1	protein-coding
2479	UPN2479	chr1	109983910	109984901	chr1:109983910-109984901	1	1	1	0		0		2479	chr1	109983910	109984901	+	0		promoter-TSS (NM_001242673)	promoter-TSS (NM_001242673)	-360	NM_006621	10768	Hs.743973	NM_006621	ENSG00000168710	AHCYL1	DCAL|IRBIT|PPP1R78|PRO0233|XPVKONA	adenosylhomocysteinase like 1	protein-coding
2480	UPN2480	chr1	110003524	110004931	chr1:110003524-110004931	2	1	1	0		0		2480	chr1	110003524	110004931	+	0		5' UTR (NM_001242675, exon 1 of 17)	5' UTR (NM_001242675, exon 1 of 17)	279	NM_001242675	10768	Hs.743973	NM_006621	ENSG00000168710	AHCYL1	DCAL|IRBIT|PPP1R78|PRO0233|XPVKONA	adenosylhomocysteinase like 1	protein-coding
2482	UPN2482	chr1	110209357	110210083	chr1:110209357-110210083	1	1	1	0		0		2482	chr1	110209357	110210083	+	0		promoter-TSS (NM_004978)	promoter-TSS (NM_004978)	267	NR_046546	100873974	Hs.130515	NR_046546		LINC02586	KCNC4-AS1	long intergenic non-protein coding RNA 2586	ncRNA
2499	UPN2499	chr1	111140883	111141423	chr1:111140883-111141423	1	1	1	0		0		2499	chr1	111140883	111141423	+	0		promoter-TSS (NR_146304)	promoter-TSS (NR_146304)	-937	NR_146303	128338	Hs.485606	NM_178454	ENSG00000156171	DRAM2	CORD21|PRO180|TMEM77|WWFQ154	DNA damage regulated autophagy modulator 2	protein-coding
2500	UPN2500	chr1	111191982	111194382	chr1:111191982-111194382	1	1	2	0		0		2500	chr1	111191982	111194382	+	0		intron (NM_001271833, intron 7 of 11)	intron (NM_001271833, intron 7 of 11)	7521	NM_024901	79961	Hs.557850	NM_024901	ENSG00000162777	DENND2D	-	DENN domain containing 2D	protein-coding
2503	UPN2503	chr1	111198489	111205792	chr1:111198489-111205792	1	2	4	0		0		2503	chr1	111198489	111205792	+	0		intron (NM_001271833, intron 1 of 11)	intron (NM_001271833, intron 1 of 11)	-1437	NM_024901	79961	Hs.557850	NM_024901	ENSG00000162777	DENND2D	-	DENN domain containing 2D	protein-coding
2511	UPN2511	chr1	111470074	111471055	chr1:111470074-111471055	1	1	1	0		0		2511	chr1	111470074	111471055	+	0		Intergenic	L2c|LINE|L2	-3305	NM_001300835	128346	Hs.288010	NM_174896	ENSG00000143110	C1orf162	-	chromosome 1 open reading frame 162	protein-coding
2512	UPN2512	chr1	111471429	111472932	chr1:111471429-111472932	1	1	1	0		0		2512	chr1	111471429	111472932	+	0		Intergenic	AluJo|SINE|Alu	-1689	NM_001300835	128346	Hs.288010	NM_174896	ENSG00000143110	C1orf162	-	chromosome 1 open reading frame 162	protein-coding
2514	UPN2514	chr1	111475414	111478440	chr1:111475414-111478440	1	2	1	0		0		2514	chr1	111475414	111478440	+	0		intron (NM_001300835, intron 3 of 4)	intron (NM_001300835, intron 3 of 4)	3058	NM_001300834	128346	Hs.288010	NM_174896	ENSG00000143110	C1orf162	-	chromosome 1 open reading frame 162	protein-coding
2515	UPN2515	chr1	111488070	111489690	chr1:111488070-111489690	1	1	1	0		0		2515	chr1	111488070	111489690	+	0		exon (NM_020683, exon 3 of 6)	exon (NM_020683, exon 3 of 6)	15011	NM_001300834	128346	Hs.288010	NM_174896	ENSG00000143110	C1orf162	-	chromosome 1 open reading frame 162	protein-coding
2516	UPN2516	chr1	111490341	111491664	chr1:111490341-111491664	1	1	1	0		0		2516	chr1	111490341	111491664	+	0		intron (NM_001081976, intron 1 of 5)	intron (NM_001081976, intron 1 of 5)	13119	NM_000677	140	Hs.281342	NM_000677	ENSG00000282608	ADORA3	A3AR	adenosine A3 receptor	protein-coding
2517	UPN2517	chr1	111502857	111506852	chr1:111502857-111506852	1	2	1	0		0		2517	chr1	111502857	111506852	+	0		promoter-TSS (NM_001302679)	promoter-TSS (NM_001302679)	-733	NM_001302679	140	Hs.281342	NM_000677	ENSG00000282608	ADORA3	A3AR	adenosine A3 receptor	protein-coding
2518	UPN2518	chr1	111507158	111510242	chr1:111507158-111510242	1	1	1	0		0		2518	chr1	111507158	111510242	+	0		intron (NM_001081976, intron 1 of 5)	intron (NM_001081976, intron 1 of 5)	-4579	NM_001302679	140	Hs.281342	NM_000677	ENSG00000282608	ADORA3	A3AR	adenosine A3 receptor	protein-coding
2519	UPN2519	chr1	111514936	111516972	chr1:111514936-111516972	1	1	1	0		0		2519	chr1	111514936	111516972	+	0		intron (NM_001081976, intron 1 of 5)	CpG	-11833	NM_001302679	140	Hs.281342	NM_000677	ENSG00000282608	ADORA3	A3AR	adenosine A3 receptor	protein-coding
2520	UPN2520	chr1	111592064	111593630	chr1:111592064-111593630	1	2	1	0		0		2520	chr1	111592064	111593630	+	0		Intergenic	Intergenic	15471	NR_034126	100129269	Hs.689728	NR_034126		LINC01160	-	long intergenic non-protein coding RNA 1160	ncRNA
2529	UPN2529	chr1	111720154	111721768	chr1:111720154-111721768	1	1	2	0		0		2529	chr1	111720154	111721768	+	0		Intergenic	Intergenic	18463	NM_019099	55924	Hs.193406	NM_019099	ENSG00000197852	INKA2	C1orf183|FAM212B	inka box actin regulator 2	protein-coding
2530	UPN2530	chr1	111731883	111735083	chr1:111731883-111735083	1	1	1	0		0		2530	chr1	111731883	111735083	+	0		intron (NM_198926, intron 1 of 1)	intron (NM_198926, intron 1 of 1)	5941	NM_019099	55924	Hs.193406	NM_019099	ENSG00000197852	INKA2	C1orf183|FAM212B	inka box actin regulator 2	protein-coding
2531	UPN2531	chr1	111736568	111740722	chr1:111736568-111740722	1	1	2	0		0		2531	chr1	111736568	111740722	+	0		intron (NM_198926, intron 1 of 1)	CpG	779	NM_019099	55924	Hs.193406	NM_019099	ENSG00000197852	INKA2	C1orf183|FAM212B	inka box actin regulator 2	protein-coding
2533	UPN2533	chr1	111754676	111755418	chr1:111754676-111755418	1	1	1	0		0		2533	chr1	111754676	111755418	+	0		promoter-TSS (NM_007204)	promoter-TSS (NM_007204)	462	NR_125963	101928718	Hs.715034	NR_125963	ENSG00000284830	LOC101928718	-	uncharacterized LOC101928718	ncRNA
2537	UPN2537	chr1	111990089	111991988	chr1:111990089-111991988	1	1	1	0		0		2537	chr1	111990089	111991988	+	0		non-coding (NR_145438, exon 1 of 2)	non-coding (NR_145438, exon 1 of 2)	502	NR_145438	643355	Hs.279714	NR_145438	ENSG00000231437	LINC01750	-	long intergenic non-protein coding RNA 1750	ncRNA
2539	UPN2539	chr1	112358525	112361512	chr1:112358525-112361512	2	1	2	0		0		2539	chr1	112358525	112361512	+	0		Intergenic	LTR78B|LTR|ERV1	-36160	NM_018704	55917	Hs.744100	NM_018704	ENSG00000143079	CTTNBP2NL	-	CTTNBP2 N-terminal like	protein-coding
2541	UPN2541	chr1	112391062	112393999	chr1:112391062-112393999	2	1	3	0		0		2541	chr1	112391062	112393999	+	0		Intergenic	MLT1C|LTR|ERVL-MaLR	-3648	NM_018704	55917	Hs.744100	NM_018704	ENSG00000143079	CTTNBP2NL	-	CTTNBP2 N-terminal like	protein-coding
2542	UPN2542	chr1	112394410	112396188	chr1:112394410-112396188	1	1	1	0		0		2542	chr1	112394410	112396188	+	0		promoter-TSS (NM_018704)	promoter-TSS (NM_018704)	-879	NM_018704	55917	Hs.744100	NM_018704	ENSG00000143079	CTTNBP2NL	-	CTTNBP2 N-terminal like	protein-coding
2544	UPN2544	chr1	112430020	112431186	chr1:112430020-112431186	1	1	1	0		0		2544	chr1	112430020	112431186	+	0		intron (NM_018704, intron 3 of 5)	AluSc8|SINE|Alu	31230	NR_036210	100422976		NR_036210	ENSG00000283296	MIR4256	-	microRNA 4256	ncRNA
2546	UPN2546	chr1	112464497	112467493	chr1:112464497-112467493	2	1	1	0		0		2546	chr1	112464497	112467493	+	0		promoter-TSS (NM_004185)	promoter-TSS (NM_004185)	-546	NM_001291880	7482	Hs.258575	NM_004185	ENSG00000134245	WNT2B	WNT13	Wnt family member 2B	protein-coding
2551	UPN2551	chr1	112620398	112621797	chr1:112620398-112621797	1	1	1	0		0		2551	chr1	112620398	112621797	+	0		intron (NM_006135, intron 1 of 9)	intron (NM_006135, intron 1 of 9)	1644	NM_006135	829	Hs.744974	NM_006135	ENSG00000116489	CAPZA1	CAPPA1|CAPZ|CAZ1	capping actin protein of muscle Z-line subunit alpha 1	protein-coding
2554	UPN2554	chr1	112697969	112707097	chr1:112697969-112707097	2	1	3	0		0		2554	chr1	112697969	112707097	+	0		intron (NM_001042678, intron 4 of 4)	intron (NM_001042678, intron 4 of 4)	4523	NM_001042679	389	Hs.502659	NM_175744	ENSG00000155366	RHOC	ARH9|ARHC|H9|RHOH9	ras homolog family member C	protein-coding
2561	UPN2561	chr1	112881577	112883217	chr1:112881577-112883217	1	1	1	0		0		2561	chr1	112881577	112883217	+	0		Intergenic	Intergenic	-31754	NR_103746	100996702	Hs.632431	NR_103746	ENSG00000215866	LINC01356	-	long intergenic non-protein coding RNA 1356	ncRNA
2579	UPN2579	chr1	113930003	113932500	chr1:113930003-113932500	1	1	1	0		0		2579	chr1	113930003	113932500	+	0		intron (NM_198268, intron 1 of 15)	intron (NM_198268, intron 1 of 15)	-1726	NR_110726	101928846	Hs.232534	NR_110725	ENSG00000235527	HIPK1-AS1	-	HIPK1 antisense RNA 1	ncRNA
2582	UPN2582	chr1	113974919	113977077	chr1:113974919-113977077	1	1	2	0		0		2582	chr1	113974919	113977077	+	0		3' UTR (NM_198268, exon 16 of 16)	3' UTR (NM_198268, exon 16 of 16)	-3393	NM_020190	56944	Hs.9315	NM_020190	ENSG00000116774	OLFML3	HNOEL-iso|OLF44	olfactomedin like 3	protein-coding
2583	UPN2583	chr1	113979052	113982283	chr1:113979052-113982283	2	1	2	0		0		2583	chr1	113979052	113982283	+	0		intron (NM_001286353, intron 2 of 2)	intron (NM_001286353, intron 2 of 2)	1276	NM_001286353	56944	Hs.9315	NM_020190	ENSG00000116774	OLFML3	HNOEL-iso|OLF44	olfactomedin like 3	protein-coding
2586	UPN2586	chr1	114113257	114114716	chr1:114113257-114114716	1	1	1	0		0		2586	chr1	114113257	114114716	+	0		intron (NM_001270805, intron 3 of 7)	L2a|LINE|L2	38454	NM_205848	148281	Hs.370963	NM_205848	ENSG00000134207	SYT6	sytVI	synaptotagmin 6	protein-coding
2588	UPN2588	chr1	114345980	114346565	chr1:114345980-114346565	1	1	1	0		0		2588	chr1	114345980	114346565	+	0		Intergenic	Intergenic	164888	NM_033020	51592	Hs.26837	NM_015906	ENSG00000197323	TRIM33	ECTO|PTC7|RFG7|TF1G|TIF1G|TIF1GAMMA|TIFGAMMA	tripartite motif containing 33	protein-coding
2600	UPN2600	chr1	115085191	115086762	chr1:115085191-115086762	1	1	1	0		0		2600	chr1	115085191	115086762	+	0		intron (NM_001308316, intron 1 of 6)	L2a|LINE|L2	3524	NM_005725	10100	Hs.310458	NM_005725	ENSG00000134198	TSPAN2	NET3|TSN2|TSPAN-2	tetraspanin 2	protein-coding
2601	UPN2601	chr1	115087371	115090991	chr1:115087371-115090991	1	3	2	0		0		2601	chr1	115087371	115090991	+	0		intron (NM_001308316, intron 1 of 6)	intron (NM_001308316, intron 1 of 6)	319	NM_005725	10100	Hs.310458	NM_005725	ENSG00000134198	TSPAN2	NET3|TSN2|TSPAN-2	tetraspanin 2	protein-coding
2616	UPN2616	chr1	116373827	116379531	chr1:116373827-116379531	2	2	1	0		0		2616	chr1	116373827	116379531	+	0		intron (NM_001160233, intron 1 of 22)	intron (NM_001160233, intron 1 of 22)	2812	NM_001160233	476	Hs.371889	NM_000701	ENSG00000163399	ATP1A1	-	ATPase Na+/K+ transporting subunit alpha 1	protein-coding
2620	UPN2620	chr1	116502428	116506694	chr1:116502428-116506694	2	1	1	0		0		2620	chr1	116502428	116506694	+	0		Intergenic	Intergenic	-25735	NR_125972	101929023	Hs.668091	NR_125972	ENSG00000233154	LINC01762	-	long intergenic non-protein coding RNA 1762	ncRNA
2629	UPN2629	chr1	116569370	116570439	chr1:116569370-116570439	1	1	1	0		0		2629	chr1	116569370	116570439	+	0		intron (NM_001144822, intron 1 of 4)	intron (NM_001144822, intron 1 of 4)	1189	NM_001779	965	Hs.34341	NM_001779	ENSG00000116815	CD58	LFA-3|LFA3|ag3	CD58 molecule	protein-coding
2636	UPN2636	chr1	116878349	116878969	chr1:116878349-116878969	1	1	1	0		0		2636	chr1	116878349	116878969	+	0		Intergenic	Intergenic	-31264	NM_020440	5738	Hs.418093	NM_020440	ENSG00000134247	PTGFRN	CD315|CD9P-1|EWI-F|FPRP|SMAP-6	prostaglandin F2 receptor inhibitor	protein-coding
2642	UPN2642	chr1	117093870	117095268	chr1:117093870-117095268	1	1	1	0		0		2642	chr1	117093870	117095268	+	0		promoter-TSS (NR_030640)	promoter-TSS (NR_030640)	-74	NR_030640	100126331		NR_030640	ENSG00000215930	MIR942	MIRN942|hsa-mir-942|mir-942	microRNA 942	ncRNA
2647	UPN2647	chr1	117612642	117614668	chr1:117612642-117614668	1	1	1	0		0		2647	chr1	117612642	117614668	+	0		intron (NM_017709, intron 1 of 1)	intron (NM_017709, intron 1 of 1)	7673	NM_017709	54855	Hs.356216	NM_017709	ENSG00000183508	TENT5C	FAM46C	terminal nucleotidyltransferase 5C	protein-coding
2658	UPN2658	chr1	121518784	121519673	chr1:121518784-121519673	1	1	1	0		0		2658	chr1	121518784	121519673	+	0		non-coding (NR_003955, exon 1 of 8)	non-coding (NR_003955, exon 1 of 8)	116	NR_003955	647121	Hs.697682	NR_003955	ENSG00000231752	EMBP1	-	embigin pseudogene 1	pseudo
2667	UPN2667	chr1	145917610	145918552	chr1:145917610-145918552	1	1	1	0		0		2667	chr1	145917610	145918552	+	0		promoter-TSS (NR_002328)	promoter-TSS (NR_002328)	377	NR_073493	8799	Hs.714608	NM_003846	ENSG00000131779	PEX11B	PEX11-BETA|PEX14B	peroxisomal biogenesis factor 11 beta	protein-coding
2668	UPN2668	chr1	145919027	145919965	chr1:145919027-145919965	1	1	1	0		0		2668	chr1	145919027	145919965	+	0		promoter-TSS (NR_073492)	promoter-TSS (NR_073492)	152	NR_104033	114814	Hs.356873	NM_057163	ENSG00000211451	GNRHR2	GnRH-II-R	gonadotropin releasing hormone receptor 2 (pseudogene)	pseudo
2669	UPN2669	chr1	145926080	145927164	chr1:145926080-145927164	1	1	1	0		0		2669	chr1	145926080	145927164	+	0		promoter-TSS (NR_147182)	promoter-TSS (NR_147182)	-209	NR_147182	105371260	Hs.603633	NR_147182	ENSG00000234222	LIX1L-AS1	-	LIX1L antisense RNA 1	ncRNA
2674	UPN2674	chr1	145959890	145964435	chr1:145959890-145964435	2	2	3	0		0		2674	chr1	145959890	145964435	+	0		intron (NM_001039888, intron 3 of 3)	intron (NM_001039888, intron 3 of 3)	2420	NM_001039888	284615	Hs.620591	NM_001039888	ENSG00000272031	ANKRD34A	ANKRD34	ankyrin repeat domain 34A	protein-coding
2675	UPN2675	chr1	145977431	145985754	chr1:145977431-145985754	1	2	2	0		0		2675	chr1	145977431	145985754	+	0		Intergenic	AluJr|SINE|Alu	14130	NM_001313972	10628	Hs.533977	NM_006472	ENSG00000265972	TXNIP	ARRDC6|EST01027|HHCPA78|THIF|VDUP1	thioredoxin interacting protein	protein-coding
2676	UPN2676	chr1	145985994	145986941	chr1:145985994-145986941	1	1	1	0		0		2676	chr1	145985994	145986941	+	0		Intergenic	Intergenic	9255	NM_001313972	10628	Hs.533977	NM_006472	ENSG00000265972	TXNIP	ARRDC6|EST01027|HHCPA78|THIF|VDUP1	thioredoxin interacting protein	protein-coding
2678	UPN2678	chr1	145997303	146000548	chr1:145997303-146000548	1	1	1	0		0		2678	chr1	145997303	146000548	+	0		Intergenic	Intergenic	-2294	NM_006472	10628	Hs.533977	NM_006472	ENSG00000265972	TXNIP	ARRDC6|EST01027|HHCPA78|THIF|VDUP1	thioredoxin interacting protein	protein-coding
2680	UPN2680	chr1	146001305	146002161	chr1:146001305-146002161	1	1	1	0		0		2680	chr1	146001305	146002161	+	0		Intergenic	Intergenic	-5102	NM_006472	10628	Hs.533977	NM_006472	ENSG00000265972	TXNIP	ARRDC6|EST01027|HHCPA78|THIF|VDUP1	thioredoxin interacting protein	protein-coding
2685	UPN2685	chr1	146038689	146039558	chr1:146038689-146039558	1	1	1	0		0		2685	chr1	146038689	146039558	+	0		Intergenic	Intergenic	13121	NR_104085	101954276		NR_104085	ENSG00000201558	RNVU1-6	RNU1-99|vU1.6	RNA, variant U1 small nuclear 6	snRNA
2687	UPN2687	chr1	147167675	147168238	chr1:147167675-147168238	1	1	1	0		0		2687	chr1	147167675	147168238	+	0		intron (NM_005399, intron 2 of 7)	intron (NM_005399, intron 2 of 7)	4633	NR_103870	5565	Hs.50732	NM_005399	ENSG00000131791	PRKAB2	-	protein kinase AMP-activated non-catalytic subunit beta 2	protein-coding
2688	UPN2688	chr1	147170514	147171662	chr1:147170514-147171662	1	1	1	0		0		2688	chr1	147170514	147171662	+	0		intron (NM_005399, intron 2 of 7)	intron (NM_005399, intron 2 of 7)	1501	NR_103870	5565	Hs.50732	NM_005399	ENSG00000131791	PRKAB2	-	protein kinase AMP-activated non-catalytic subunit beta 2	protein-coding
2691	UPN2691	chr1	147539345	147540168	chr1:147539345-147540168	1	1	1	0		0		2691	chr1	147539345	147540168	+	0		Intergenic	Intergenic	-1745	NM_004326	607	Hs.415209	NM_004326	ENSG00000116128	BCL9	LGS	B cell CLL/lymphoma 9	protein-coding
2692	UPN2692	chr1	147540718	147540953	chr1:147540718-147540953	1	1	1	0		0		2692	chr1	147540718	147540953	+	0		promoter-TSS (NM_004326)	promoter-TSS (NM_004326)	-666	NM_004326	607	Hs.415209	NM_004326	ENSG00000116128	BCL9	LGS	B cell CLL/lymphoma 9	protein-coding
2693	UPN2693	chr1	147541466	147542500	chr1:147541466-147542500	1	1	1	0		0		2693	chr1	147541466	147542500	+	0		intron (NM_004326, intron 1 of 9)	G-rich|Low_complexity|Low_complexity	482	NM_004326	607	Hs.415209	NM_004326	ENSG00000116128	BCL9	LGS	B cell CLL/lymphoma 9	protein-coding
2708	UPN2708	chr1	149899781	149900500	chr1:149899781-149900500	1	1	1	0		0		2708	chr1	149899781	149900500	+	0		exon (NM_001321026, exon 2 of 2)	exon (NM_001321026, exon 2 of 2)	558	NM_016074	51027	Hs.13880	NM_016074	ENSG00000178096	BOLA1	CGI-143	bolA family member 1	protein-coding
2709	UPN2709	chr1	149928177	149928847	chr1:149928177-149928847	1	1	1	0		0		2709	chr1	149928177	149928847	+	0		promoter-TSS (NM_005850)	promoter-TSS (NM_005850)	-260	NM_005850	10262	Hs.516160	NM_005850	ENSG00000143368	SF3B4	AFD1|Hsh49|SAP49|SF3b49	splicing factor 3b subunit 4	protein-coding
2715	UPN2715	chr1	150150578	150156427	chr1:150150578-150156427	2	2	1	0		0		2715	chr1	150150578	150156427	+	0		intron (NM_001304724, intron 2 of 4)	intron (NM_001304724, intron 2 of 4)	2916	NM_001304723	51177	Hs.438824	NM_016274	ENSG00000023902	PLEKHO1	CKIP-1|CKIP1|JBP|OC120	pleckstrin homology domain containing O1	protein-coding
2716	UPN2716	chr1	150156875	150160256	chr1:150156875-150160256	1	1	1	0		0		2716	chr1	150156875	150160256	+	0		intron (NM_016274, intron 5 of 5)	AluSz|SINE|Alu	-2163	NR_135098	105371433	Hs.599366	NR_135098		LOC105371433	-	uncharacterized LOC105371433	ncRNA
2717	UPN2717	chr1	150160517	150166373	chr1:150160517-150166373	1	1	2	0		0		2717	chr1	150160517	150166373	+	0		intron (NR_135098, intron 1 of 3)	intron (NR_135098, intron 1 of 3)	2717	NR_135098	105371433	Hs.599366	NR_135098		LOC105371433	-	uncharacterized LOC105371433	ncRNA
2723	UPN2723	chr1	150281435	150282871	chr1:150281435-150282871	1	1	1	0		0		2723	chr1	150281435	150282871	+	0		promoter-TSS (NM_001300841)	promoter-TSS (NM_001300841)	-380	NM_001300838	148523	Hs.54680	NM_144697	ENSG00000159208	CIART	C1orf51|CHRONO|GM129	circadian associated repressor of transcription	protein-coding
2730	UPN2730	chr1	150548750	150554890	chr1:150548750-150554890	2	2	1	0		0		2730	chr1	150548750	150554890	+	0		promoter-TSS (NR_036211)	promoter-TSS (NR_036211)	-109	NR_036211	100422997		NR_036211	ENSG00000264553	MIR4257	-	microRNA 4257	ncRNA
2731	UPN2731	chr1	150557800	150570806	chr1:150557800-150570806	1	2	2	0		0		2731	chr1	150557800	150570806	+	0		intron (NR_104133, intron 2 of 3)	MER58B|DNA|hAT-Charlie	10249	NR_104133	574406	Hs.516243	NM_001025493	ENSG00000203804	ADAMTSL4-AS1	C1orf138	ADAMTSL4 antisense RNA 1	ncRNA
2735	UPN2735	chr1	150574404	150575376	chr1:150574404-150575376	1	1	1	0		0		2735	chr1	150574404	150575376	+	0		promoter-TSS (NR_104133)	promoter-TSS (NR_104133)	-338	NR_104133	574406	Hs.516243	NM_001025493	ENSG00000203804	ADAMTSL4-AS1	C1orf138	ADAMTSL4 antisense RNA 1	ncRNA
2736	UPN2736	chr1	150575501	150576062	chr1:150575501-150576062	1	1	1	0		0		2736	chr1	150575501	150576062	+	0		3' UTR (NM_021960, exon 3 of 3)	3' UTR (NM_021960, exon 3 of 3)	-1229	NR_104133	574406	Hs.516243	NM_001025493	ENSG00000203804	ADAMTSL4-AS1	C1orf138	ADAMTSL4 antisense RNA 1	ncRNA
2737	UPN2737	chr1	150580082	150580709	chr1:150580082-150580709	1	1	1	0		0		2737	chr1	150580082	150580709	+	0		promoter-TSS (NM_021960)	promoter-TSS (NM_021960)	-657	NM_001197320	4170	Hs.632486	NM_021960	ENSG00000143384	MCL1	BCL2L3|EAT|MCL1-ES|MCL1L|MCL1S|Mcl-1|TM|bcl2-L-3|mcl1/EAT	MCL1, BCL2 family apoptosis regulator	protein-coding
2738	UPN2738	chr1	150581139	150581642	chr1:150581139-150581642	1	1	1	0		0		2738	chr1	150581139	150581642	+	0		Intergenic	Intergenic	-1652	NM_001197320	4170	Hs.632486	NM_021960	ENSG00000143384	MCL1	BCL2L3|EAT|MCL1-ES|MCL1L|MCL1S|Mcl-1|TM|bcl2-L-3|mcl1/EAT	MCL1, BCL2 family apoptosis regulator	protein-coding
2739	UPN2739	chr1	150604117	150605603	chr1:150604117-150605603	1	1	1	0		0		2739	chr1	150604117	150605603	+	0		Intergenic	Intergenic	24273	NM_207045	2029	Hs.632456	NM_004436	ENSG00000143420	ENSA	ARPP-19e	endosulfine alpha	protein-coding
2740	UPN2740	chr1	150609308	150616217	chr1:150609308-150616217	1	1	2	0		0		2740	chr1	150609308	150616217	+	0		Intergenic	MER20|DNA|hAT-Charlie	16371	NM_207045	2029	Hs.632456	NM_004436	ENSG00000143420	ENSA	ARPP-19e	endosulfine alpha	protein-coding
2742	UPN2742	chr1	150619054	150622860	chr1:150619054-150622860	1	1	1	0		0		2742	chr1	150619054	150622860	+	0		Intergenic	AluJb|SINE|Alu	8176	NM_207045	2029	Hs.632456	NM_004436	ENSG00000143420	ENSA	ARPP-19e	endosulfine alpha	protein-coding
2756	UPN2756	chr1	150974886	150977956	chr1:150974886-150977956	1	2	2	0		0		2756	chr1	150974886	150977956	+	0		Intergenic	Intergenic	-1418	NM_181746	29956	Hs.744017	NM_013384	ENSG00000143418	CERS2	L3|LASS2|SP260|TMSG1	ceramide synthase 2	protein-coding
2758	UPN2758	chr1	151002061	151003875	chr1:151002061-151003875	1	1	1	0		0		2758	chr1	151002061	151003875	+	0		5' UTR (NM_018379, exon 3 of 11)	5' UTR (NM_018379, exon 3 of 11)	3829	NM_001163260	55793	Hs.743952	NM_018379	ENSG00000143409	MINDY1	FAM63A|MINDY-1	MINDY lysine 48 deubiquitinase 1	protein-coding
2760	UPN2760	chr1	151005555	151009783	chr1:151005555-151009783	1	2	2	0		0		2760	chr1	151005555	151009783	+	0		promoter-TSS (NR_130132)	promoter-TSS (NR_130132)	80	NM_001319998	55793	Hs.743952	NM_018379	ENSG00000143409	MINDY1	FAM63A|MINDY-1	MINDY lysine 48 deubiquitinase 1	protein-coding
2763	UPN2763	chr1	151055042	151058763	chr1:151055042-151058763	1	1	1	0		0		2763	chr1	151055042	151058763	+	0		intron (NM_001038707, intron 1 of 5)	intron (NM_001038707, intron 1 of 5)	2747	NM_020239	56882	Hs.22065	NM_020239	ENSG00000197622	CDC42SE1	SCIP1|SPEC1	CDC42 small effector 1	protein-coding
2768	UPN2768	chr1	151158354	151159993	chr1:151158354-151159993	1	1	1	0		0		2768	chr1	151158354	151159993	+	0		TTS (NM_212551)	TTS (NM_212551)	2544	NR_144937	100534012	Hs.732060	NM_001204848	ENSG00000163156	TNFAIP8L2-SCNM1	-	TNFAIP8L2-SCNM1 readthrough	protein-coding
2769	UPN2769	chr1	151164850	151165845	chr1:151164850-151165845	1	1	1	0		0		2769	chr1	151164850	151165845	+	0		promoter-TSS (NR_037937)	promoter-TSS (NR_037937)	547	NM_212551	388695	Hs.591482	NM_212551	ENSG00000163155	LYSMD1	SB145	LysM domain containing 1	protein-coding
2774	UPN2774	chr1	151282780	151284397	chr1:151282780-151284397	1	1	1	0		0		2774	chr1	151282780	151284397	+	0		intron (NM_020832, intron 1 of 8)	intron (NM_020832, intron 1 of 8)	1276	NM_001304763	57592	Hs.186756	NM_020832	ENSG00000143373	ZNF687	PDB6	zinc finger protein 687	protein-coding
2776	UPN2776	chr1	151309759	151314439	chr1:151309759-151314439	3	1	2	0		0		2776	chr1	151309759	151314439	+	0		intron (NM_002651, intron 3 of 12)	intron (NM_002651, intron 3 of 12)	15616	NM_002651	5298	Hs.632465	NM_002651	ENSG00000143393	PI4KB	NPIK|PI4K-BETA|PI4K92|PI4KBETA|PI4KIIIBETA|PIK4CB	phosphatidylinositol 4-kinase beta	protein-coding
2778	UPN2778	chr1	151328033	151328761	chr1:151328033-151328761	1	1	1	0		0		2778	chr1	151328033	151328761	+	0		promoter-TSS (NM_001198775)	promoter-TSS (NM_001198775)	-682	NM_001198774	5298	Hs.632465	NM_002651	ENSG00000143393	PI4KB	NPIK|PI4K-BETA|PI4K92|PI4KBETA|PI4KIIIBETA|PIK4CB	phosphatidylinositol 4-kinase beta	protein-coding
2779	UPN2779	chr1	151345760	151346969	chr1:151345760-151346969	1	1	1	0		0		2779	chr1	151345760	151346969	+	0		promoter-TSS (NR_131972)	promoter-TSS (NR_131972)	-646	NR_131972	101927886	Hs.634042	NR_131972		GBAT2	-	glioblastoma multiforme-associated transcript 2	ncRNA
2803	UPN2803	chr1	151944082	151947230	chr1:151944082-151947230	2	1	1	0		0		2803	chr1	151944082	151947230	+	0		Intergenic	Intergenic	-35771	NM_053055	117145	Hs.164070	NM_053055	ENSG00000159445	THEM4	CTMP	thioesterase superfamily member 4	protein-coding
2805	UPN2805	chr1	151988464	151994697	chr1:151988464-151994697	2	2	2	0		0		2805	chr1	151988464	151994697	+	0		intron (NM_002966, intron 1 of 2)	intron (NM_002966, intron 1 of 2)	2658	NM_002966	6281	Hs.143873	NM_002966	ENSG00000197747	S100A10	42C|ANX2L|ANX2LG|CAL1L|CLP11|Ca[1]|GP11|P11|p10	S100 calcium binding protein A10	protein-coding
2807	UPN2807	chr1	152033992	152035770	chr1:152033992-152035770	1	1	1	0		0		2807	chr1	152033992	152035770	+	0		intron (NM_005620, intron 1 of 2)	intron (NM_005620, intron 1 of 2)	2154	NM_005620	6282	Hs.417004	NM_005620	ENSG00000163191	S100A11	HEL-S-43|MLN70|S100C	S100 calcium binding protein A11	protein-coding
2808	UPN2808	chr1	152036950	152038057	chr1:152036950-152038057	1	1	1	0		0		2808	chr1	152036950	152038057	+	0		promoter-TSS (NM_005620)	promoter-TSS (NM_005620)	-468	NM_005620	6282	Hs.417004	NM_005620	ENSG00000163191	S100A11	HEL-S-43|MLN70|S100C	S100 calcium binding protein A11	protein-coding
2810	UPN2810	chr1	152046312	152051023	chr1:152046312-152051023	1	1	1	0		0		2810	chr1	152046312	152051023	+	0		Intergenic	Intergenic	-11632	NM_005620	6282	Hs.417004	NM_005620	ENSG00000163191	S100A11	HEL-S-43|MLN70|S100C	S100 calcium binding protein A11	protein-coding
2813	UPN2813	chr1	153355996	153358027	chr1:153355996-153358027	1	1	1	0		0		2813	chr1	153355996	153358027	+	0		promoter-TSS (NM_002965)	promoter-TSS (NM_002965)	-843	NM_002965	6280	Hs.112405	NM_002965	ENSG00000163220	S100A9	60B8AG|CAGB|CFAG|CGLB|L1AG|LIAG|MAC387|MIF|MRP14|NIF|P14	S100 calcium binding protein A9	protein-coding
2821	UPN2821	chr1	153384447	153385616	chr1:153384447-153385616	1	1	1	0		0		2821	chr1	153384447	153385616	+	0		Intergenic	Intergenic	5945	NM_001319201	6279	Hs.416073	NM_002964	ENSG00000143546	S100A8	60B8AG|CAGA|CFAG|CGLA|CP-10|L1Ag|MA387|MIF|MRP8|NIF|P8	S100 calcium binding protein A8	protein-coding
2823	UPN2823	chr1	153390581	153391972	chr1:153390581-153391972	2	1	1	0		0		2823	chr1	153390581	153391972	+	0		promoter-TSS (NM_002964)	promoter-TSS (NM_002964)	-88	NM_002964	6279	Hs.416073	NM_002964	ENSG00000143546	S100A8	60B8AG|CAGA|CFAG|CGLA|CP-10|L1Ag|MA387|MIF|MRP8|NIF|P8	S100 calcium binding protein A8	protein-coding
2824	UPN2824	chr1	153490705	153491866	chr1:153490705-153491866	1	1	1	0		0		2824	chr1	153490705	153491866	+	0		Intergenic	Intergenic	-30624	NM_002963	6278	Hs.112408	NM_002963	ENSG00000143556	S100A7	PSOR1|S100A7c	S100 calcium binding protein A7	protein-coding
2825	UPN2825	chr1	153492931	153493699	chr1:153492931-153493699	1	1	1	0		0		2825	chr1	153492931	153493699	+	0		Intergenic	AluSx|SINE|Alu	-32654	NM_002963	6278	Hs.112408	NM_002963	ENSG00000143556	S100A7	PSOR1|S100A7c	S100 calcium binding protein A7	protein-coding
2831	UPN2831	chr1	153532295	153537700	chr1:153532295-153537700	1	1	1	0		0		2831	chr1	153532295	153537700	+	0		intron (NM_014624, intron 2 of 2)	intron (NM_014624, intron 2 of 2)	1244	NM_014624	6277	Hs.275243	NM_014624	ENSG00000197956	S100A6	2A9|5B10|CABP|CACY|PRA|S10A6	S100 calcium binding protein A6	protein-coding
2832	UPN2832	chr1	153538107	153538683	chr1:153538107-153538683	1	1	1	0		0		2832	chr1	153538107	153538683	+	0		intron (NM_002962, intron 3 of 3)	intron (NM_002962, intron 3 of 3)	-2154	NM_014624	6277	Hs.275243	NM_014624	ENSG00000197956	S100A6	2A9|5B10|CABP|CACY|PRA|S10A6	S100 calcium binding protein A6	protein-coding
2833	UPN2833	chr1	153539601	153551602	chr1:153539601-153551602	1	4	1	0		0		2833	chr1	153539601	153551602	+	0		promoter-TSS (NR_125947)	promoter-TSS (NR_125947)	-141	NR_125947	101928034	Hs.711397	NR_125947		LOC101928034	-	uncharacterized LOC101928034	ncRNA
2834	UPN2834	chr1	153553288	153555084	chr1:153553288-153555084	1	1	1	0		0		2834	chr1	153553288	153555084	+	0		Intergenic	Intergenic	-4928	NM_002960	6274	Hs.557609	NM_002960	ENSG00000188015	S100A3	S100E	S100 calcium binding protein A3	protein-coding
2836	UPN2836	chr1	153565340	153568922	chr1:153565340-153568922	1	1	1	0		0		2836	chr1	153565340	153568922	+	0		Intergenic	Intergenic	-1301	NM_005978	6273	Hs.516484	NM_005978	ENSG00000196754	S100A2	CAN19|S100L	S100 calcium binding protein A2	protein-coding
2838	UPN2838	chr1	153607386	153611622	chr1:153607386-153611622	1	1	2	0		0		2838	chr1	153607386	153611622	+	0		promoter-TSS (NM_001317007)	promoter-TSS (NM_001317007)	-149	NM_001317007	140576	Hs.515714	NM_080388	ENSG00000188643	S100A16	AAG13|DT1P1A7|S100F	S100 calcium binding protein A16	protein-coding
2841	UPN2841	chr1	153626175	153630539	chr1:153626175-153630539	1	1	1	0		0		2841	chr1	153626175	153630539	+	0		promoter-TSS (NM_006271)	promoter-TSS (NM_006271)	-40	NM_006271	6271	Hs.515715	NM_006271	ENSG00000160678	S100A1	S100|S100-alpha|S100A	S100 calcium binding protein A1	protein-coding
2842	UPN2842	chr1	153632656	153634014	chr1:153632656-153634014	1	1	1	0		0		2842	chr1	153632656	153634014	+	0		promoter-TSS (NM_015607)	promoter-TSS (NM_015607)	-647	NM_015607	26097	Hs.611057	NM_015607	ENSG00000160679	CHTOP	C10orf77|C1orf77|FL-SRAG|FOP|SRAG|SRAG-3|SRAG-5|pp7704	chromatin target of PRMT1	protein-coding
2844	UPN2844	chr1	153646957	153647617	chr1:153646957-153647617	1	1	1	0		0		2844	chr1	153646957	153647617	+	0		TTS (NM_015607)	TTS (NM_015607)	-11367	NR_052019	23557	Hs.32018	NM_012437	ENSG00000143553	SNAPIN	BLOC1S7|BLOS7|BORCS3|SNAPAP	SNAP associated protein	protein-coding
2846	UPN2846	chr1	153652641	153653002	chr1:153652641-153653002	1	1	1	0		0		2846	chr1	153652641	153653002	+	0		Intergenic	Intergenic	-5833	NR_052019	23557	Hs.32018	NM_012437	ENSG00000143553	SNAPIN	BLOC1S7|BLOS7|BORCS3|SNAPAP	SNAP associated protein	protein-coding
2847	UPN2847	chr1	153658383	153659999	chr1:153658383-153659999	1	2	1	0		0		2847	chr1	153658383	153659999	+	0		intron (NM_012437, intron 2 of 3)	intron (NM_012437, intron 2 of 3)	537	NM_012437	23557	Hs.32018	NM_012437	ENSG00000143553	SNAPIN	BLOC1S7|BLOS7|BORCS3|SNAPAP	SNAP associated protein	protein-coding
2849	UPN2849	chr1	153678309	153679987	chr1:153678309-153679987	1	1	1	0		0		2849	chr1	153678309	153679987	+	0		exon (NM_000906, exon 1 of 22)	exon (NM_000906, exon 1 of 22)	460	NM_000906	4881	Hs.490330	NM_000906	ENSG00000169418	NPR1	ANPRA|ANPa|GUC2A|GUCY2A|NPRA	natriuretic peptide receptor 1	protein-coding
2851	UPN2851	chr1	153696876	153699634	chr1:153696876-153699634	1	1	2	0		0		2851	chr1	153696876	153699634	+	0		Intergenic	Intergenic	-8462	NR_107050	102466879		NR_107050	ENSG00000274940	MIR8083	hsa-mir-8083	microRNA 8083	ncRNA
2858	UPN2858	chr1	153742614	153743607	chr1:153742614-153743607	1	1	1	0		0		2858	chr1	153742614	153743607	+	0		intron (NM_023015, intron 3 of 29).2	intron (NM_023015, intron 3 of 29).2	15043	NM_001324475	65123	Hs.438723	NM_023015	ENSG00000143624	INTS3	C1orf193|C1orf60|INT3|SOSS-A|SOSSA	integrator complex subunit 3	protein-coding
2859	UPN2859	chr1	153749951	153753251	chr1:153749951-153753251	1	2	2	0		0		2859	chr1	153749951	153753251	+	0		intron (NM_023015, intron 7 of 29).2	intron (NM_023015, intron 7 of 29).2	-22753	NM_001317929	11000	Hs.438723	NM_024330	ENSG00000143554	SLC27A3	ACSVL3|FATP3|VLCS-3	solute carrier family 27 member 3	protein-coding
2861	UPN2861	chr1	153772275	153777346	chr1:153772275-153777346	1	1	1	0		0		2861	chr1	153772275	153777346	+	0		TTS (NM_001324475)	TTS (NM_001324475)	456	NR_145826	11000	Hs.438723	NM_024330	ENSG00000143554	SLC27A3	ACSVL3|FATP3|VLCS-3	solute carrier family 27 member 3	protein-coding
2863	UPN2863	chr1	153789379	153791947	chr1:153789379-153791947	1	1	1	0		0		2863	chr1	153789379	153791947	+	0		Intergenic	Charlie24|DNA|hAT-Charlie	-3284	NR_126565	343052	Hs.516530	NR_126565	ENSG00000231827	LOC343052	-	immunoglobulin superfamily DCC subclass member 3 pseudogene	pseudo
2866	UPN2866	chr1	153943812	153946161	chr1:153943812-153946161	1	2	1	0		0		2866	chr1	153943812	153946161	+	0		intron (NM_014856, intron 1 of 27)	intron (NM_014856, intron 1 of 27)	1692	NM_014856	9909	Hs.744878	NM_014856	ENSG00000198837	DENND4B	KIAA0476	DENN domain containing 4B	protein-coding
2869	UPN2869	chr1	153958794	153963469	chr1:153958794-153963469	1	2	2	0		0		2869	chr1	153958794	153963469	+	0		intron (NM_001271961, intron 2 of 2)	AluSx1|SINE|Alu	1289	NR_106795	102465441		NR_106795	ENSG00000276584	MIR6737	hsa-mir-6737	microRNA 6737	ncRNA
2874	UPN2874	chr1	153985075	153987200	chr1:153985075-153987200	1	1	2	0		0		2874	chr1	153985075	153987200	+	0		promoter-TSS (NM_001272038)	promoter-TSS (NM_001272038)	240	NM_002870	5872	Hs.151536	NM_002870	ENSG00000143545	RAB13	GIG4	RAB13, member RAS oncogene family	protein-coding
2876	UPN2876	chr1	154154520	154155958	chr1:154154520-154155958	2	1	2	0		0		2876	chr1	154154520	154155958	+	0		promoter-TSS (NM_207308)	promoter-TSS (NM_207308)	-123	NM_207308	91181	Hs.67639	NM_207308	ENSG00000143552	NUP210L	-	nucleoporin 210 like	protein-coding
2879	UPN2879	chr1	154177041	154179758	chr1:154177041-154179758	2	2	2	0		0		2879	chr1	154177041	154179758	+	0		promoter-TSS (NM_001278191)	promoter-TSS (NM_001278191)	-178	NM_001278191	7170	Hs.535581	NM_152263	ENSG00000143549	TPM3	CAPM1|CFTD|HEL-189|HEL-S-82p|NEM1|OK/SW-cl.5|TM-5|TM3|TM30|TM30nm|TM5|TPM3nu|TPMsk3|TRK|hscp30	tropomyosin 3	protein-coding
2880	UPN2880	chr1	154180031	154180641	chr1:154180031-154180641	1	1	1	0		0		2880	chr1	154180031	154180641	+	0		intron (NM_152263, intron 2 of 9)	intron (NM_152263, intron 2 of 9)	-2115	NM_001278191	7170	Hs.535581	NM_152263	ENSG00000143549	TPM3	CAPM1|CFTD|HEL-189|HEL-S-82p|NEM1|OK/SW-cl.5|TM-5|TM3|TM30|TM30nm|TM5|TPM3nu|TPMsk3|TRK|hscp30	tropomyosin 3	protein-coding
2882	UPN2882	chr1	154183311	154183967	chr1:154183311-154183967	1	1	1	0		0		2882	chr1	154183311	154183967	+	0		promoter-TSS (NM_001278188)	promoter-TSS (NM_001278188)	-390	NM_153649	7170	Hs.535581	NM_152263	ENSG00000143549	TPM3	CAPM1|CFTD|HEL-189|HEL-S-82p|NEM1|OK/SW-cl.5|TM-5|TM3|TM30|TM30nm|TM5|TPM3nu|TPMsk3|TRK|hscp30	tropomyosin 3	protein-coding
2884	UPN2884	chr1	154221394	154223102	chr1:154221394-154223102	2	1	1	0		0		2884	chr1	154221394	154223102	+	0		intron (NM_001330730, intron 1 of 26)	intron (NM_001330730, intron 1 of 26)	1399	NM_014847	9898	Hs.490551	NM_014847	ENSG00000143569	UBAP2L	NICE-4|NICE4	ubiquitin associated protein 2 like	protein-coding
2886	UPN2886	chr1	154324684	154325416	chr1:154324684-154325416	1	1	1	0		0		2886	chr1	154324684	154325416	+	0		promoter-TSS (NM_001005855)	promoter-TSS (NM_001005855)	-510	NM_001005855	57198	Hs.435700	NM_020452	ENSG00000143515	ATP8B2	ATPID	ATPase phospholipid transporting 8B2	protein-coding
2887	UPN2887	chr1	154325720	154329466	chr1:154325720-154329466	1	1	1	0		0		2887	chr1	154325720	154329466	+	0		promoter-TSS (NM_020452)	promoter-TSS (NM_020452)	-207	NM_020452	57198	Hs.435700	NM_020452	ENSG00000143515	ATP8B2	ATPID	ATPase phospholipid transporting 8B2	protein-coding
2895	UPN2895	chr1	154352395	154353602	chr1:154352395-154353602	1	1	1	0		0		2895	chr1	154352395	154353602	+	0		Intergenic	Intergenic	25198	NM_020452	57198	Hs.435700	NM_020452	ENSG00000143515	ATP8B2	ATPID	ATPase phospholipid transporting 8B2	protein-coding
2898	UPN2898	chr1	154403453	154409806	chr1:154403453-154409806	1	1	1	0		0		2898	chr1	154403453	154409806	+	0		promoter-TSS (NR_147855)	promoter-TSS (NR_147855)	-65	NR_147855	101928101	Hs.617089	NR_147855	ENSG00000228013	IL6R-AS1	-	IL6R antisense RNA 1	ncRNA
2901	UPN2901	chr1	154418227	154421891	chr1:154418227-154421891	1	2	1	0		0		2901	chr1	154418227	154421891	+	0		intron (NM_001206866, intron 1 of 6)	intron (NM_001206866, intron 1 of 6)	-13495	NR_147855	101928101	Hs.617089	NR_147855	ENSG00000228013	IL6R-AS1	-	IL6R antisense RNA 1	ncRNA
2902	UPN2902	chr1	154422237	154424388	chr1:154422237-154424388	2	1	1	0		0		2902	chr1	154422237	154424388	+	0		intron (NM_001206866, intron 1 of 6)	L1ME4a|LINE|L1	-16748	NR_147855	101928101	Hs.617089	NR_147855	ENSG00000228013	IL6R-AS1	-	IL6R antisense RNA 1	ncRNA
2906	UPN2906	chr1	154430743	154434654	chr1:154430743-154434654	1	1	2	0		0		2906	chr1	154430743	154434654	+	0		intron (NM_001206866, intron 3 of 6)	intron (NM_001206866, intron 3 of 6)	-26134	NR_147855	101928101	Hs.617089	NR_147855	ENSG00000228013	IL6R-AS1	-	IL6R antisense RNA 1	ncRNA
2909	UPN2909	chr1	154463250	154464160	chr1:154463250-154464160	1	1	1	0		0		2909	chr1	154463250	154464160	+	0		intron (NM_000565, intron 9 of 9)	intron (NM_000565, intron 9 of 9)	38345	NM_001010846	126669	Hs.591481	NM_001010846	ENSG00000169291	SHE	-	Src homology 2 domain containing E	protein-coding
2910	UPN2910	chr1	154464660	154467335	chr1:154464660-154467335	2	1	1	0		0		2910	chr1	154464660	154467335	+	0		3' UTR (NM_000565, exon 10 of 10)	3' UTR (NM_000565, exon 10 of 10)	36053	NM_001010846	126669	Hs.591481	NM_001010846	ENSG00000169291	SHE	-	Src homology 2 domain containing E	protein-coding
2914	UPN2914	chr1	154490690	154494098	chr1:154490690-154494098	1	1	1	0		0		2914	chr1	154490690	154494098	+	0		intron (NM_001010846, intron 2 of 5)	intron (NM_001010846, intron 2 of 5)	9656	NM_001010846	126669	Hs.591481	NM_001010846	ENSG00000169291	SHE	-	Src homology 2 domain containing E	protein-coding
2917	UPN2917	chr1	154501342	154503193	chr1:154501342-154503193	1	1	1	0		0		2917	chr1	154501342	154503193	+	0		promoter-TSS (NR_135169)	promoter-TSS (NR_135169)	48	NM_001098475	126668	Hs.387671	NM_182499	ENSG00000163239	TDRD10	-	tudor domain containing 10	protein-coding
2920	UPN2920	chr1	154558996	154559760	chr1:154558996-154559760	1	1	1	0		0		2920	chr1	154558996	154559760	+	0		promoter-TSS (NM_017582)	promoter-TSS (NM_017582)	-734	NM_017582	55585	Hs.607928	NM_017582	ENSG00000160714	UBE2Q1	GTAP|NICE-5|NICE5|PRO3094|UBE2Q	ubiquitin conjugating enzyme E2 Q1	protein-coding
2924	UPN2924	chr1	154728308	154732733	chr1:154728308-154732733	2	1	2	0		0		2924	chr1	154728308	154732733	+	0		intron (NM_002249, intron 4 of 7)	intron (NM_002249, intron 4 of 7)	-102540	NM_001025107	103	Hs.12341	NM_001111	ENSG00000160710	ADAR	ADAR1|AGS6|DRADA|DSH|DSRAD|G1P1|IFI-4|IFI4|K88DSRBP|P136	adenosine deaminase, RNA specific	protein-coding
2936	UPN2936	chr1	154940155	154943151	chr1:154940155-154943151	1	1	1	0		0		2936	chr1	154940155	154943151	+	0		intron (NM_001323012, intron 1 of 4)	intron (NM_001323012, intron 1 of 4)	1036	NM_001323012	10654	Hs.30954	NM_006556	ENSG00000163344	PMVK	HUMPMKI|PMK|PMKA|PMKASE|POROK1	phosphomevalonate kinase	protein-coding
2939	UPN2939	chr1	154956339	154957205	chr1:154956339-154957205	1	1	1	0		0		2939	chr1	154956339	154957205	+	0		promoter-TSS (NM_001317735)	promoter-TSS (NM_001317735)	-609	NM_001317735	57326	Hs.505806	NM_020524	ENSG00000163346	PBXIP1	HPIP	PBX homeobox interacting protein 1	protein-coding
2940	UPN2940	chr1	154960587	154961571	chr1:154960587-154961571	1	1	1	0		0		2940	chr1	154960587	154961571	+	0		promoter-TSS (NM_001321726)	promoter-TSS (NM_001321726)	-392	NM_001321726	101928120	Hs.533597	NM_001321726		LOC101928120	-	uncharacterized LOC101928120	protein-coding
2942	UPN2942	chr1	154967169	154973827	chr1:154967169-154973827	1	1	1	0		0		2942	chr1	154967169	154973827	+	0		exon (NM_001130040, exon 1 of 12)	exon (NM_001130040, exon 1 of 12)	249	NM_001130040	6464	Hs.433795	NM_003029	ENSG00000160691	SHC1	SHC|SHCA	SHC adaptor protein 1	protein-coding
2944	UPN2944	chr1	154975989	154977015	chr1:154975989-154977015	1	1	1	0		0		2944	chr1	154975989	154977015	+	0		TTS (NR_036212)	TTS (NR_036212)	809	NR_036212	100423020		NR_036212	ENSG00000264349	MIR4258	-	microRNA 4258	ncRNA
2946	UPN2946	chr1	154983436	154984136	chr1:154983436-154984136	1	1	1	0		0		2946	chr1	154983436	154984136	+	0		exon (NM_025207, exon 1 of 7)	exon (NM_025207, exon 1 of 7)	492	NM_025207	80308	Hs.118666	NM_025207	ENSG00000160688	FLAD1	FAD1|FADS|LSMFLAD|PP591	flavin adenine dinucleotide synthetase 1	protein-coding
2947	UPN2947	chr1	154999206	155001878	chr1:154999206-155001878	2	1	1	0		0		2947	chr1	154999206	155001878	+	0		Intergenic	Intergenic	-2088	NM_001252406	51043	Hs.729279	NM_001252406	ENSG00000160685	ZBTB7B	CKROX|THPOK|ZBTB15|ZFP-67|ZFP67|ZNF857B|c-KROX|hcKROX	zinc finger and BTB domain containing 7B	protein-coding
2948	UPN2948	chr1	155003306	155018260	chr1:155003306-155018260	3	2	2	0		0		2948	chr1	155003306	155018260	+	0		intron (NR_045515, intron 3 of 5)	intron (NR_045515, intron 3 of 5)	8153	NM_001256455	51043	Hs.729279	NM_001252406	ENSG00000160685	ZBTB7B	CKROX|THPOK|ZBTB15|ZFP-67|ZFP67|ZNF857B|c-KROX|hcKROX	zinc finger and BTB domain containing 7B	protein-coding
2949	UPN2949	chr1	155049739	155053455	chr1:155049739-155053455	1	2	1	0		0		2949	chr1	155049739	155053455	+	0		promoter-TSS (NR_040772)	promoter-TSS (NR_040772)	325	NM_207197	8751	Hs.312098	NM_003815	ENSG00000143537	ADAM15	MDC15	ADAM metallopeptidase domain 15	protein-coding
2952	UPN2952	chr1	155070631	155071599	chr1:155070631-155071599	1	1	1	0		0		2952	chr1	155070631	155071599	+	0		Intergenic	CpG	-7124	NR_040773	100505666	Hs.657533	NR_040772		DCST1-AS1	-	DCST1 antisense RNA 1	ncRNA
2955	UPN2955	chr1	155125583	155130436	chr1:155125583-155130436	1	2	2	0		0		2955	chr1	155125583	155130436	+	0		exon (NM_004428, exon 1 of 5)	exon (NM_004428, exon 1 of 5)	136	NM_004428	1942	Hs.516664	NM_004428	ENSG00000169242	EFNA1	B61|ECKLG|EFL1|EPLG1|LERK-1|LERK1|TNFAIP4	ephrin A1	protein-coding
2959	UPN2959	chr1	155133823	155135561	chr1:155133823-155135561	1	1	1	0		0		2959	chr1	155133823	155135561	+	0		promoter-TSS (NM_001287590)	promoter-TSS (NM_001287590)	-652	NM_001287592	55974	Hs.292154	NM_018845	ENSG00000169241	SLC50A1	HsSWEET1|RAG1AP1|SCP|SWEET1|slv	solute carrier family 50 member 1	protein-coding
2960	UPN2960	chr1	155135913	155137833	chr1:155135913-155137833	1	1	1	0		0		2960	chr1	155135913	155137833	+	0		exon (NM_018845, exon 3 of 6)	exon (NM_018845, exon 3 of 6)	1061	NM_001287588	55974	Hs.292154	NM_018845	ENSG00000169241	SLC50A1	HsSWEET1|RAG1AP1|SCP|SWEET1|slv	solute carrier family 50 member 1	protein-coding
2962	UPN2962	chr1	155139670	155140272	chr1:155139670-155140272	1	1	1	0		0		2962	chr1	155139670	155140272	+	0		TTS (NM_018973)	TTS (NM_018973)	436	NM_018973	54344	Hs.110477	NM_018973	ENSG00000179085	DPM3	CDG1O	dolichyl-phosphate mannosyltransferase subunit 3	protein-coding
2965	UPN2965	chr1	155172207	155173021	chr1:155172207-155173021	1	1	1	0		0		2965	chr1	155172207	155173021	+	0		exon (NM_173852, exon 3 of 5)	exon (NM_173852, exon 3 of 5)	714	NM_173852	200185	Hs.516671	NM_173852	ENSG00000163463	KRTCAP2	KCP2	keratinocyte associated protein 2	protein-coding
2969	UPN2969	chr1	155191948	155197111	chr1:155191948-155197111	1	1	2	0		0		2969	chr1	155191948	155197111	+	0		promoter-TSS (NR_030281)	promoter-TSS (NR_030281)	-648	NR_030281	693235		NR_030281	ENSG00000284586	MIR92B	MIRN92B|hsa-mir-92b|mir-92b	microRNA 92b	ncRNA
2970	UPN2970	chr1	155206941	155211467	chr1:155206941-155211467	2	2	3	0		0		2970	chr1	155206941	155211467	+	0		exon (NM_002455, exon 1 of 8)	exon (NM_002455, exon 1 of 8)	505	NM_198883	4580	Hs.490874	NM_002455	ENSG00000173171	MTX1	MTX|MTXN	metaxin 1	protein-coding
2972	UPN2972	chr1	155219156	155220352	chr1:155219156-155220352	1	1	1	0		0		2972	chr1	155219156	155220352	+	0		intron (NR_002188, intron 1 of 12)	intron (NR_002188, intron 1 of 12)	7780	NR_002188	2630	Hs.719930	NR_002188	ENSG00000160766	GBAP1	GBAP	glucosylceramidase beta pseudogene 1	pseudo
2973	UPN2973	chr1	155223713	155227218	chr1:155223713-155227218	2	2	1	0		0		2973	chr1	155223713	155227218	+	0		intron (NR_002188, intron 1 of 12)	AluSx1|SINE|Alu	2069	NR_002188	2630	Hs.719930	NR_002188	ENSG00000160766	GBAP1	GBAP	glucosylceramidase beta pseudogene 1	pseudo
2977	UPN2977	chr1	155244973	155245408	chr1:155244973-155245408	1	1	1	0		0		2977	chr1	155244973	155245408	+	0		promoter-TSS (NM_001171811)	promoter-TSS (NM_001171811)	-328	NM_001005741	2629	Hs.282997	NM_000157	ENSG00000177628	GBA	GBA1|GCB|GLUC	glucosylceramidase beta	protein-coding
2978	UPN2978	chr1	155250206	155250792	chr1:155250206-155250792	1	1	1	0		0		2978	chr1	155250206	155250792	+	0		exon (NM_001267608, exon 8 of 11)	exon (NM_001267608, exon 8 of 11)	4984	NM_198264	10712	Hs.348308	NM_006589	ENSG00000160767	FAM189B	C1orf2|COTE1	family with sequence similarity 189 member B	protein-coding
2979	UPN2979	chr1	155253845	155256900	chr1:155253845-155256900	1	1	2	0		0		2979	chr1	155253845	155256900	+	0		TTS (NM_052837)	TTS (NM_052837)	111	NM_198264	10712	Hs.348308	NM_006589	ENSG00000160767	FAM189B	C1orf2|COTE1	family with sequence similarity 189 member B	protein-coding
2986	UPN2986	chr1	155320577	155323355	chr1:155320577-155323355	1	1	1	0		0		2986	chr1	155320577	155323355	+	0		exon (NM_001105204, exon 2 of 10)	exon (NM_001105204, exon 2 of 10)	1117	NM_001105203	23623	Hs.226499	NM_014328	ENSG00000160753	RUSC1	NESCA	RUN and SH3 domain containing 1	protein-coding
2989	UPN2989	chr1	155859511	155860977	chr1:155859511-155860977	1	1	1	0		0		2989	chr1	155859511	155860977	+	0		promoter-TSS (NM_001282856)	promoter-TSS (NM_001282856)	775	NM_152280	23208	Hs.32984	NM_152280	ENSG00000132718	SYT11	SYT12|sytXI	synaptotagmin 11	protein-coding
2990	UPN2990	chr1	155892775	155894375	chr1:155892775-155894375	1	1	1	0		0		2990	chr1	155892775	155894375	+	0		Intergenic	Intergenic	17340	NM_001256821	6016	Hs.491234	NM_006912	ENSG00000143622	RIT1	NS8|RIBB|RIT|ROC1	Ras like without CAAX 1	protein-coding
2991	UPN2991	chr1	155909473	155910916	chr1:155909473-155910916	1	1	1	0		0		2991	chr1	155909473	155910916	+	0		intron (NM_001256820, intron 2 of 4)	intron (NM_001256820, intron 2 of 4)	721	NM_001256821	6016	Hs.491234	NM_006912	ENSG00000143622	RIT1	NS8|RIBB|RIT|ROC1	Ras like without CAAX 1	protein-coding
2995	UPN2995	chr1	155939935	155942634	chr1:155939935-155942634	1	2	2	0		0		2995	chr1	155939935	155942634	+	0		promoter-TSS (NM_181885)	promoter-TSS (NM_181885)	-405	NM_181885	339403	Hs.449914	NM_181885	ENSG00000173080	RXFP4	GPCR142|GPR100|RLN3R2|RXFPR4	relaxin family peptide/INSL5 receptor 4	protein-coding
2999	UPN2999	chr1	155966240	155973471	chr1:155966240-155973471	2	3	2	0		0		2999	chr1	155966240	155973471	+	0		intron (NM_001350112, intron 1 of 21)	intron (NM_001350112, intron 1 of 21)	8320	NM_001350111	9181	Hs.743352	NM_004723	ENSG00000116584	ARHGEF2	GEF|GEF-H1|GEFH1|LFP40|NEDMHM|P40	Rho/Rac guanine nucleotide exchange factor 2	protein-coding
3000	UPN3000	chr1	155973844	155984500	chr1:155973844-155984500	1	1	2	0		0		3000	chr1	155973844	155984500	+	0		promoter-TSS (NM_001350111)	promoter-TSS (NM_001350111)	118	NM_001350110	9181	Hs.743352	NM_004723	ENSG00000116584	ARHGEF2	GEF|GEF-H1|GEFH1|LFP40|NEDMHM|P40	Rho/Rac guanine nucleotide exchange factor 2	protein-coding
3001	UPN3001	chr1	155988836	155991407	chr1:155988836-155991407	1	1	1	0		0		3001	chr1	155988836	155991407	+	0		Intergenic	Intergenic	-10561	NM_001350112	9181	Hs.743352	NM_004723	ENSG00000116584	ARHGEF2	GEF|GEF-H1|GEFH1|LFP40|NEDMHM|P40	Rho/Rac guanine nucleotide exchange factor 2	protein-coding
3008	UPN3008	chr1	156095736	156099193	chr1:156095736-156099193	1	2	2	0		0		3008	chr1	156095736	156099193	+	0		intron (NM_001282625, intron 3 of 12)	MIRb|SINE|MIR	14918	NM_001282625	4000	Hs.594444	NM_005572	ENSG00000160789	LMNA	CDCD1|CDDC|CMD1A|CMT2B1|EMD2|FPL|FPLD|FPLD2|HGPS|IDC|LDP1|LFP|LGMD1B|LMN1|LMNC|LMNL1|MADA|PRO1	lamin A/C	protein-coding
3010	UPN3010	chr1	156101733	156107773	chr1:156101733-156107773	1	2	2	0		0		3010	chr1	156101733	156107773	+	0		intron (NM_001282625, intron 3 of 12)	intron (NM_001282625, intron 3 of 12)	-9917	NM_005572	4000	Hs.594444	NM_005572	ENSG00000160789	LMNA	CDCD1|CDDC|CMD1A|CMT2B1|EMD2|FPL|FPLD|FPLD2|HGPS|IDC|LDP1|LFP|LGMD1B|LMN1|LMNC|LMNL1|MADA|PRO1	lamin A/C	protein-coding
3011	UPN3011	chr1	156111827	156112984	chr1:156111827-156112984	2	1	1	0		0		3011	chr1	156111827	156112984	+	0		intron (NM_001282625, intron 3 of 12)	intron (NM_001282625, intron 3 of 12)	-2265	NM_005572	4000	Hs.594444	NM_005572	ENSG00000160789	LMNA	CDCD1|CDDC|CMD1A|CMT2B1|EMD2|FPL|FPLD|FPLD2|HGPS|IDC|LDP1|LFP|LGMD1B|LMN1|LMNC|LMNL1|MADA|PRO1	lamin A/C	protein-coding
3013	UPN3013	chr1	156115699	156116547	chr1:156115699-156116547	1	1	1	0		0		3013	chr1	156115699	156116547	+	0		intron (NM_005572, intron 1 of 9)	intron (NM_005572, intron 1 of 9)	1453	NM_001282626	4000	Hs.594444	NM_005572	ENSG00000160789	LMNA	CDCD1|CDDC|CMD1A|CMT2B1|EMD2|FPL|FPLD|FPLD2|HGPS|IDC|LDP1|LFP|LGMD1B|LMN1|LMNC|LMNL1|MADA|PRO1	lamin A/C	protein-coding
3014	UPN3014	chr1	156117439	156119063	chr1:156117439-156119063	1	1	1	0		0		3014	chr1	156117439	156119063	+	0		intron (NM_005572, intron 1 of 9)	intron (NM_005572, intron 1 of 9)	3581	NM_001282626	4000	Hs.594444	NM_005572	ENSG00000160789	LMNA	CDCD1|CDDC|CMD1A|CMT2B1|EMD2|FPL|FPLD|FPLD2|HGPS|IDC|LDP1|LFP|LGMD1B|LMN1|LMNC|LMNL1|MADA|PRO1	lamin A/C	protein-coding
3015	UPN3015	chr1	156119383	156131031	chr1:156119383-156131031	1	1	1	0		0		3015	chr1	156119383	156131031	+	0		promoter-TSS (NM_001282624)	promoter-TSS (NM_001282624)	-910	NM_001282624	4000	Hs.594444	NM_005572	ENSG00000160789	LMNA	CDCD1|CDDC|CMD1A|CMT2B1|EMD2|FPL|FPLD|FPLD2|HGPS|IDC|LDP1|LFP|LGMD1B|LMN1|LMNC|LMNL1|MADA|PRO1	lamin A/C	protein-coding
3019	UPN3019	chr1	156146367	156150193	chr1:156146367-156150193	3	1	3	0		0		3019	chr1	156146367	156150193	+	0		Intergenic	Intergenic	-1664	NM_001193301	64218	Hs.408846	NM_022367	ENSG00000196189	SEMA4A	CORD10|RP35|SEMAB|SEMB	semaphorin 4A	protein-coding
3021	UPN3021	chr1	156153302	156155108	chr1:156153302-156155108	1	1	1	0		0		3021	chr1	156153302	156155108	+	0		intron (NM_001193302, intron 1 of 12)	intron (NM_001193302, intron 1 of 12)	627	NM_001193302	64218	Hs.408846	NM_022367	ENSG00000196189	SEMA4A	CORD10|RP35|SEMAB|SEMB	semaphorin 4A	protein-coding
3022	UPN3022	chr1	156160332	156161040	chr1:156160332-156161040	1	1	1	0		0		3022	chr1	156160332	156161040	+	0		intron (NM_001193300, intron 7 of 14)	L2a|LINE|L2	7108	NM_001193302	64218	Hs.408846	NM_022367	ENSG00000196189	SEMA4A	CORD10|RP35|SEMAB|SEMB	semaphorin 4A	protein-coding
3023	UPN3023	chr1	156161373	156162497	chr1:156161373-156162497	1	1	2	0		0		3023	chr1	156161373	156162497	+	0		intron (NM_001193300, intron 9 of 14)	L4_A_Mam|LINE|RTE-X	8357	NM_001193302	64218	Hs.408846	NM_022367	ENSG00000196189	SEMA4A	CORD10|RP35|SEMAB|SEMB	semaphorin 4A	protein-coding
3030	UPN3030	chr1	156217379	156218510	chr1:156217379-156218510	1	1	1	0		0		3030	chr1	156217379	156218510	+	0		intron (NM_001199664, intron 1 of 4)	L1ME5|LINE|L1	4956	NM_001199662	100527963	Hs.530479	NM_001199661	ENSG00000260238	PMF1-BGLAP	PMF1	PMF1-BGLAP readthrough	protein-coding
3036	UPN3036	chr1	156456915	156458761	chr1:156456915-156458761	2	1	1	0		0		3036	chr1	156456915	156458761	+	0		Intergenic	Intergenic	-28290	NR_135263	10485	Hs.380027	NM_006365	ENSG00000125462	C1orf61	CROC4	chromosome 1 open reading frame 61	protein-coding
3038	UPN3038	chr1	156464391	156467149	chr1:156464391-156467149	1	2	2	0		0		3038	chr1	156464391	156467149	+	0		3' UTR (NM_001271629, exon 11 of 11)	3' UTR (NM_001271629, exon 11 of 11)	24829	NM_001271629	4209	Hs.314327	NM_005920	ENSG00000116604	MEF2D	-	myocyte enhancer factor 2D	protein-coding
3042	UPN3042	chr1	156475041	156480084	chr1:156475041-156480084	2	1	1	0		0		3042	chr1	156475041	156480084	+	0		intron (NM_005920, intron 6 of 11)	intron (NM_005920, intron 6 of 11)	13037	NM_001271629	4209	Hs.314327	NM_005920	ENSG00000116604	MEF2D	-	myocyte enhancer factor 2D	protein-coding
3044	UPN3044	chr1	156487477	156495184	chr1:156487477-156495184	1	1	4	0		0		3044	chr1	156487477	156495184	+	0		promoter-TSS (NM_001271629)	promoter-TSS (NM_001271629)	-731	NM_001271629	4209	Hs.314327	NM_005920	ENSG00000116604	MEF2D	-	myocyte enhancer factor 2D	protein-coding
3045	UPN3045	chr1	156501073	156506862	chr1:156501073-156506862	1	1	2	0		0		3045	chr1	156501073	156506862	+	0		Intergenic	Intergenic	-3125	NM_005920	4209	Hs.314327	NM_005920	ENSG00000116604	MEF2D	-	myocyte enhancer factor 2D	protein-coding
3046	UPN3046	chr1	156507470	156511330	chr1:156507470-156511330	1	1	1	0		0		3046	chr1	156507470	156511330	+	0		Intergenic	Intergenic	-8558	NM_005920	4209	Hs.314327	NM_005920	ENSG00000116604	MEF2D	-	myocyte enhancer factor 2D	protein-coding
3055	UPN3055	chr1	156659676	156665989	chr1:156659676-156665989	2	1	2	0		0		3055	chr1	156659676	156665989	+	0		Intergenic	AluJb|SINE|Alu	14565	NM_006617	10763	Hs.527971	NM_006617	ENSG00000132688	NES	Nbla00170	nestin	protein-coding
3057	UPN3057	chr1	156667094	156671089	chr1:156667094-156671089	2	1	1	0		0		3057	chr1	156667094	156671089	+	0		3' UTR (NM_006617, exon 4 of 4)	3' UTR (NM_006617, exon 4 of 4)	8306	NM_006617	10763	Hs.527971	NM_006617	ENSG00000132688	NES	Nbla00170	nestin	protein-coding
3058	UPN3058	chr1	156675213	156677792	chr1:156675213-156677792	1	2	1	0		0		3058	chr1	156675213	156677792	+	0		exon (NM_006617, exon 1 of 4)	exon (NM_006617, exon 1 of 4)	895	NM_006617	10763	Hs.527971	NM_006617	ENSG00000132688	NES	Nbla00170	nestin	protein-coding
3059	UPN3059	chr1	156705085	156708547	chr1:156705085-156708547	1	1	2	0		0		3059	chr1	156705085	156708547	+	0		promoter-TSS (NM_001199723)	promoter-TSS (NM_001199723)	-1000	NM_001199723	1382	Hs.405662	NM_001878	ENSG00000143320	CRABP2	CRABP-II|RBP6	cellular retinoic acid binding protein 2	protein-coding
3064	UPN3064	chr1	156740517	156741015	chr1:156740517-156741015	1	1	1	0		0		3064	chr1	156740517	156741015	+	0		intron (NM_024540, intron 1 of 5)	intron (NM_024540, intron 1 of 5)	365	NM_145729	79590	Hs.418233	NM_024540	ENSG00000143314	MRPL24	L24mt|MRP-L18|MRP-L24	mitochondrial ribosomal protein L24	protein-coding
3065	UPN3065	chr1	156741482	156742016	chr1:156741482-156742016	1	1	1	0		0		3065	chr1	156741482	156742016	+	0		promoter-TSS (NM_024540)	promoter-TSS (NM_024540)	-618	NM_024540	79590	Hs.418233	NM_024540	ENSG00000143314	MRPL24	L24mt|MRP-L18|MRP-L24	mitochondrial ribosomal protein L24	protein-coding
3068	UPN3068	chr1	156744745	156751379	chr1:156744745-156751379	1	1	1	0		0		3068	chr1	156744745	156751379	+	0		intron (NM_001126050, intron 1 of 5)	intron (NM_001126050, intron 1 of 5)	3231	NM_001319188	3068	Hs.743948	NM_004494	ENSG00000143321	HDGF	HMG1L2	heparin binding growth factor	protein-coding
3070	UPN3070	chr1	156766168	156766910	chr1:156766168-156766910	1	1	1	0		0		3070	chr1	156766168	156766910	+	0		promoter-TSS (NM_005973)	promoter-TSS (NM_005973)	-943	NM_005973	5546	Hs.516948	NM_005973	ENSG00000143294	PRCC	RCCP1|TPRC	papillary renal cell carcinoma (translocation-associated)	protein-coding
3072	UPN3072	chr1	156801875	156802890	chr1:156801875-156802890	1	1	1	0		0		3072	chr1	156801875	156802890	+	0		Intergenic	Intergenic	-13368	NM_001007792	4914	Hs.406293	NM_002529	ENSG00000198400	NTRK1	MTC|TRK|TRK1|TRKA|Trk-A|p140-TrkA	neurotrophic receptor tyrosine kinase 1	protein-coding
3075	UPN3075	chr1	156813457	156817527	chr1:156813457-156817527	1	1	1	0		0		3075	chr1	156813457	156817527	+	0		promoter-TSS (NM_001007792)	promoter-TSS (NM_001007792)	-258	NM_001007792	4914	Hs.406293	NM_002529	ENSG00000198400	NTRK1	MTC|TRK|TRK1|TRKA|Trk-A|p140-TrkA	neurotrophic receptor tyrosine kinase 1	protein-coding
3077	UPN3077	chr1	156892394	156898256	chr1:156892394-156898256	1	1	1	0		0		3077	chr1	156892394	156898256	+	0		intron (NM_001353682, intron 1 of 22)	intron (NM_001353682, intron 1 of 22)	1594	NM_001080471	375033	Hs.142003	NM_207369	ENSG00000187800	PEAR1	JEDI|MEGF12	platelet endothelial aggregation receptor 1	protein-coding
3085	UPN3085	chr1	157992536	157996175	chr1:157992536-157996175	2	2	1	0		0		3085	chr1	157992536	157996175	+	0		intron (NM_001286349, intron 1 of 12)	intron (NM_001286349, intron 1 of 12)	1082	NM_018240	55243	Hs.272234	NM_018240	ENSG00000183853	KIRREL1	KIRREL|NEPH1	kirre like nephrin family adhesion molecule 1	protein-coding
3088	UPN3088	chr1	158008081	158012465	chr1:158008081-158012465	1	1	2	0		0		3088	chr1	158008081	158012465	+	0		intron (NM_001286349, intron 1 of 12)	intron (NM_001286349, intron 1 of 12)	-15277	NR_145471	100505785	Hs.664656	NR_145471		KIRREL1-IT1	KIRREL-IT1	KIRREL1 intronic transcript 1	ncRNA
3092	UPN3092	chr1	158017987	158021527	chr1:158017987-158021527	1	2	1	0		0		3092	chr1	158017987	158021527	+	0		intron (NM_001286349, intron 1 of 12)	intron (NM_001286349, intron 1 of 12)	-5793	NR_145471	100505785	Hs.664656	NR_145471		KIRREL1-IT1	KIRREL-IT1	KIRREL1 intronic transcript 1	ncRNA
3096	UPN3096	chr1	158148854	158150621	chr1:158148854-158150621	1	2	2	0		0		3096	chr1	158148854	158150621	+	0		Intergenic	CpG	-9097	NR_033946	646268	Hs.506902	NR_033946	ENSG00000231666	LINC01704	-	long intergenic non-protein coding RNA 1704	ncRNA
3100	UPN3100	chr1	158808393	158809326	chr1:158808393-158809326	1	1	1	0		0		3100	chr1	158808393	158809326	+	0		Intergenic	Intergenic	-22444	NM_002432	4332	Hs.153837	NM_002432	ENSG00000163563	MNDA	PYHIN3	myeloid cell nuclear differentiation antigen	protein-coding
3105	UPN3105	chr1	159004904	159006202	chr1:159004904-159006202	1	1	1	0		0		3105	chr1	159004904	159006202	+	0		Intergenic	Intergenic	-4339	NM_005531	3428	Hs.380250	NM_005531	ENSG00000163565	IFI16	IFNGIP1|PYHIN2	interferon gamma inducible protein 16	protein-coding
3106	UPN3106	chr1	159007197	159009803	chr1:159007197-159009803	2	1	1	0		0		3106	chr1	159007197	159009803	+	0		Intergenic	Intergenic	-1392	NM_005531	3428	Hs.380250	NM_005531	ENSG00000163565	IFI16	IFNGIP1|PYHIN2	interferon gamma inducible protein 16	protein-coding
3122	UPN3122	chr1	159889535	159890620	chr1:159889535-159890620	1	1	1	0		0		3122	chr1	159889535	159890620	+	0		intron (NM_012337, intron 3 of 11)	intron (NM_012337, intron 3 of 11)	10002	NR_130464	100422852		NR_130464	ENSG00000266458	MIR4259	-	microRNA 4259	ncRNA
3125	UPN3125	chr1	159909884	159912113	chr1:159909884-159912113	1	1	1	0		0		3125	chr1	159909884	159912113	+	0		Intergenic	Intergenic	-10882	NM_012337	25790	Hs.647705	NM_012337	ENSG00000213085	CFAP45	CCDC19|NESG1	cilia and flagella associated protein 45	protein-coding
3126	UPN3126	chr1	159916267	159916893	chr1:159916267-159916893	1	1	1	0		0		3126	chr1	159916267	159916893	+	0		Intergenic	Intergenic	7137	NM_001277224	8407	Hs.517168	NM_003564	ENSG00000158710	TAGLN2	HA1756	transgelin 2	protein-coding
3128	UPN3128	chr1	159920890	159924069	chr1:159920890-159924069	1	2	1	0		0		3128	chr1	159920890	159924069	+	0		intron (NM_003564, intron 1 of 4)	intron (NM_003564, intron 1 of 4)	1238	NM_001277224	8407	Hs.517168	NM_003564	ENSG00000158710	TAGLN2	HA1756	transgelin 2	protein-coding
3134	UPN3134	chr1	160205511	160208736	chr1:160205511-160208736	2	1	1	0		0		3134	chr1	160205511	160208736	+	0		intron (NR_123725, intron 2 of 4)	intron (NR_123725, intron 2 of 4)	1746	NR_123725	729867	Hs.674191	NR_123725	ENSG00000227741	LOC729867	-	uncharacterized LOC729867	ncRNA
3136	UPN3136	chr1	160217385	160219720	chr1:160217385-160219720	1	1	1	0		0		3136	chr1	160217385	160219720	+	0		intron (NM_015726, intron 12 of 13)	intron (NM_015726, intron 12 of 13)	-9683	NR_123725	729867	Hs.674191	NR_123725	ENSG00000227741	LOC729867	-	uncharacterized LOC729867	ncRNA
3150	UPN3150	chr1	160570172	160574826	chr1:160570172-160574826	3	1	1	0		0		3150	chr1	160570172	160574826	+	0		intron (NM_001184881, intron 1 of 5)	MIRb|SINE|MIR	7017	NM_001184881	8832	Hs.398093	NM_003874	ENSG00000066294	CD84	LY9B|SLAMF5|hCD84|mCD84	CD84 molecule	protein-coding
3151	UPN3151	chr1	160575553	160576367	chr1:160575553-160576367	1	1	1	0		0		3151	chr1	160575553	160576367	+	0		intron (NM_001184881, intron 1 of 5)	intron (NM_001184881, intron 1 of 5)	3556	NM_001184881	8832	Hs.398093	NM_003874	ENSG00000066294	CD84	LY9B|SLAMF5|hCD84|mCD84	CD84 molecule	protein-coding
3164	UPN3164	chr1	160664901	160666990	chr1:160664901-160666990	1	2	1	0		0		3164	chr1	160664901	160666990	+	0		Intergenic	L2c|LINE|L2	-18634	NR_104400	6504	Hs.523660	NM_003037	ENSG00000117090	SLAMF1	CD150|CDw150|SLAM	signaling lymphocytic activation molecule family member 1	protein-coding
3172	UPN3172	chr1	160706401	160709184	chr1:160706401-160709184	1	1	2	0		0		3172	chr1	160706401	160709184	+	0		intron (NM_001256030, intron 1 of 2)	(TCCA)n|Simple_repeat|Simple_repeat	4059	NM_001778	962	Hs.243564	NM_001778	ENSG00000117091	CD48	BCM1|BLAST|BLAST1|MEM-102|SLAMF2|hCD48|mCD48	CD48 molecule	protein-coding
3183	UPN3183	chr1	160862045	160863529	chr1:160862045-160863529	1	1	1	0		0		3183	chr1	160862045	160863529	+	0		5' UTR (NM_001166664, exon 1 of 8)	5' UTR (NM_001166664, exon 1 of 8)	115	NM_016382	51744	Hs.157872	NM_016382	ENSG00000122223	CD244	2B4|NAIL|NKR2B4|Nmrk|SLAMF4	CD244 molecule	protein-coding
3186	UPN3186	chr1	161012846	161014799	chr1:161012846-161014799	1	2	1	0		0		3186	chr1	161012846	161014799	+	0		intron (NM_001348091, intron 1 of 8)	intron (NM_001348091, intron 1 of 8)	7521	NM_016946	50848	Hs.517293	NM_016946	ENSG00000158769	F11R	CD321|JAM|JAM1|JAMA|JCAM|KAT|PAM-1	F11 receptor	protein-coding
3188	UPN3188	chr1	161017788	161021623	chr1:161017788-161021623	1	2	3	0		0		3188	chr1	161017788	161021623	+	0		intron (NM_001348091, intron 1 of 8)	intron (NM_001348091, intron 1 of 8)	1638	NM_016946	50848	Hs.517293	NM_016946	ENSG00000158769	F11R	CD321|JAM|JAM1|JAMA|JCAM|KAT|PAM-1	F11 receptor	protein-coding
3190	UPN3190	chr1	161044234	161044789	chr1:161044234-161044789	1	1	1	0		0		3190	chr1	161044234	161044789	+	0		intron (NM_007122, intron 1 of 10)	intron (NM_007122, intron 1 of 10)	426	NM_001276373	7391	Hs.414880	NM_007122	ENSG00000158773	USF1	FCHL|FCHL1|HYPLIP1|MLTF|MLTFI|UEF|bHLHb11	upstream transcription factor 1	protein-coding
3197	UPN3197	chr1	161097935	161099061	chr1:161097935-161099061	1	1	1	0		0		3197	chr1	161097935	161099061	+	0		5' UTR (NM_152366, exon 1 of 4)	5' UTR (NM_152366, exon 1 of 4)	107	NM_001007255	126823	Hs.507290	NM_152366	ENSG00000162755	KLHDC9	KARCA1	kelch domain containing 9	protein-coding
3198	UPN3198	chr1	161118232	161120736	chr1:161118232-161120736	1	1	1	0		0		3198	chr1	161118232	161120736	+	0		intron (NM_001185093, intron 2 of 5)	intron (NM_001185093, intron 2 of 5)	1366	NM_001185094	4817	Hs.146406	NM_005600	ENSG00000158793	NIT1	-	nitrilase 1	protein-coding
3202	UPN3202	chr1	161158856	161161658	chr1:161158856-161161658	2	1	1	0		0		3202	chr1	161158856	161161658	+	0		intron (NM_001319847, intron 1 of 12)	intron (NM_001319847, intron 1 of 12)	793	NM_001319848	27005	Hs.8015	NM_012475	ENSG00000143258	USP21	USP16|USP23	ubiquitin specific peptidase 21	protein-coding
3203	UPN3203	chr1	161164925	161167562	chr1:161164925-161167562	2	2	2	0		0		3203	chr1	161164925	161167562	+	0		promoter-TSS (NM_000309)	promoter-TSS (NM_000309)	-138	NM_000309	5498	Hs.517373	NM_000309	ENSG00000143224	PPOX	PPO|V290M|VP	protoporphyrinogen oxidase	protein-coding
3206	UPN3206	chr1	161175975	161178245	chr1:161175975-161178245	1	1	1	0		0		3206	chr1	161175975	161178245	+	0		intron (NM_001199873, intron 1 of 7)	intron (NM_001199873, intron 1 of 7)	858	NM_001199874	8703	Hs.321231	NM_003779	ENSG00000158850	B4GALT3	beta4Gal-T3	beta-1,4-galactosyltransferase 3	protein-coding
3209	UPN3209	chr1	161182063	161184883	chr1:161182063-161184883	2	2	2	0		0		3209	chr1	161182063	161184883	+	0		Intergenic	AluSg4|SINE|Alu	-5505	NM_001199873	8703	Hs.321231	NM_003779	ENSG00000158850	B4GALT3	beta4Gal-T3	beta-1,4-galactosyltransferase 3	protein-coding
3210	UPN3210	chr1	161185204	161187841	chr1:161185204-161187841	1	1	1	0		0		3210	chr1	161185204	161187841	+	0		Intergenic	Intergenic	-8554	NM_001199873	8703	Hs.321231	NM_003779	ENSG00000158850	B4GALT3	beta4Gal-T3	beta-1,4-galactosyltransferase 3	protein-coding
3213	UPN3213	chr1	161193086	161202170	chr1:161193086-161202170	2	2	2	0		0		3213	chr1	161193086	161202170	+	0		intron (NM_001320336, intron 1 of 8)	intron (NM_001320336, intron 1 of 8)	1425	NM_001320336	9507	Hs.211604	NM_005099	ENSG00000158859	ADAMTS4	ADAMTS-2|ADAMTS-4|ADMP-1	ADAM metallopeptidase with thrombospondin type 1 motif 4	protein-coding
3214	UPN3214	chr1	161202572	161204662	chr1:161202572-161204662	1	1	1	0		0		3214	chr1	161202572	161204662	+	0		intron (NM_004550, intron 3 of 14)	AluJr4|SINE|Alu	1470	NM_001166159	4720	Hs.173611	NM_004550	ENSG00000158864	NDUFS2	CI-49	NADH:ubiquinone oxidoreductase core subunit S2	protein-coding
3216	UPN3216	chr1	161205787	161207813	chr1:161205787-161207813	1	1	1	0		0		3216	chr1	161205787	161207813	+	0		intron (NM_004550, intron 4 of 14)	intron (NM_004550, intron 4 of 14)	4653	NM_001166159	4720	Hs.173611	NM_004550	ENSG00000158864	NDUFS2	CI-49	NADH:ubiquinone oxidoreductase core subunit S2	protein-coding
3221	UPN3221	chr1	161226060	161227804	chr1:161226060-161227804	2	1	1	0		0		3221	chr1	161226060	161227804	+	0		promoter-TSS (NR_049819)	promoter-TSS (NR_049819)	-254	NR_049819	100847090		NR_049819	ENSG00000284035	MIR5187	mir-5187	microRNA 5187	ncRNA
3223	UPN3223	chr1	161305063	161307585	chr1:161305063-161307585	1	1	1	0		0		3223	chr1	161305063	161307585	+	0		intron (NM_000530, intron 4 of 5)	intron (NM_000530, intron 4 of 5)	3648	NM_001315491	4359	Hs.591486	NM_000530	ENSG00000158887	MPZ	CHM|CMT1|CMT1B|CMT2I|CMT2J|CMT4E|CMTDI3|CMTDID|DSS|HMSNIB|MPP|P0	myelin protein zero	protein-coding
3227	UPN3227	chr1	161390341	161390714	chr1:161390341-161390714	1	1	1	0		0		3227	chr1	161390341	161390714	+	0		Intergenic	CpG	-22644	NM_001013625	257177	Hs.534593	NM_001013625	ENSG00000188931	CFAP126	C1orf192|Flattop|Fltp	cilia and flagella associated protein 126	protein-coding
3243	UPN3243	chr1	161725811	161726954	chr1:161725811-161726954	1	1	1	0		0		3243	chr1	161725811	161726954	+	0		intron (NM_001288830, intron 3 of 4)	CpG	3729	NM_001288830	127943	Hs.517422	NM_001002901	ENSG00000162746	FCRLB	FCRL2|FCRLM2|FCRLY|FREB-2|FREB2|FcRY	Fc receptor like B	protein-coding
3245	UPN3245	chr1	161739011	161741045	chr1:161739011-161741045	1	2	2	0		0		3245	chr1	161739011	161741045	+	0		Intergenic	Intergenic	-9740	NM_007240	11266	Hs.416216	NM_007240	ENSG00000081721	DUSP12	DUSP1|YVH1	dual specificity phosphatase 12	protein-coding
3248	UPN3248	chr1	161770952	161772527	chr1:161770952-161772527	1	1	1	0		0		3248	chr1	161770952	161772527	+	0		intron (NM_007348, intron 1 of 15)	AluJo|SINE|Alu	5495	NM_007348	22926	Hs.492740	NM_007348	ENSG00000118217	ATF6	ACHM7|ATF6A	activating transcription factor 6	protein-coding
3253	UPN3253	chr1	162001863	162005350	chr1:162001863-162005350	2	2	2	0		0		3253	chr1	162001863	162005350	+	0		intron (NM_001347700, intron 4 of 7)	intron (NM_001347700, intron 4 of 7)	20859	NM_001297713	25903	Hs.507515	NM_015441	ENSG00000162745	OLFML2B	-	olfactomedin like 2B	protein-coding
3269	UPN3269	chr1	164636738	164637781	chr1:164636738-164637781	1	1	1	0		0		3269	chr1	164636738	164637781	+	0		intron (NM_001204961, intron 2 of 7)	intron (NM_001204961, intron 2 of 7)	77537	NM_001353130	5087	Hs.557097	NM_002585	ENSG00000185630	PBX1	CAKUHED	PBX homeobox 1	protein-coding
3273	UPN3273	chr1	164648161	164649150	chr1:164648161-164649150	1	1	1	0		0		3273	chr1	164648161	164649150	+	0		intron (NM_001204961, intron 2 of 7)	MIRb|SINE|MIR	88933	NM_001353130	5087	Hs.557097	NM_002585	ENSG00000185630	PBX1	CAKUHED	PBX homeobox 1	protein-coding
3276	UPN3276	chr1	164706469	164707489	chr1:164706469-164707489	1	1	1	0		0		3276	chr1	164706469	164707489	+	0		intron (NM_001204961, intron 2 of 7)	intron (NM_001204961, intron 2 of 7)	67662	NR_038072	100505795	Hs.661039	NR_038072	ENSG00000233693	LOC100505795	-	uncharacterized LOC100505795	ncRNA
3280	UPN3280	chr1	164712475	164713067	chr1:164712475-164713067	1	1	1	0		0		3280	chr1	164712475	164713067	+	0		intron (NM_001204961, intron 2 of 7)	intron (NM_001204961, intron 2 of 7)	61870	NR_038072	100505795	Hs.661039	NR_038072	ENSG00000233693	LOC100505795	-	uncharacterized LOC100505795	ncRNA
3287	UPN3287	chr1	164764712	164766670	chr1:164764712-164766670	1	1	2	0		0		3287	chr1	164764712	164766670	+	0		intron (NM_001204961, intron 2 of 7)	MIRb|SINE|MIR	8950	NR_038072	100505795	Hs.661039	NR_038072	ENSG00000233693	LOC100505795	-	uncharacterized LOC100505795	ncRNA
3289	UPN3289	chr1	164767935	164768789	chr1:164767935-164768789	1	1	1	0		0		3289	chr1	164767935	164768789	+	0		TTS (NR_038072)	TTS (NR_038072)	6279	NR_038072	100505795	Hs.661039	NR_038072	ENSG00000233693	LOC100505795	-	uncharacterized LOC100505795	ncRNA
3290	UPN3290	chr1	164770435	164771519	chr1:164770435-164771519	1	1	1	0		0		3290	chr1	164770435	164771519	+	0		non-coding (NR_038072, exon 2 of 4)	non-coding (NR_038072, exon 2 of 4)	3664	NR_038072	100505795	Hs.661039	NR_038072	ENSG00000233693	LOC100505795	-	uncharacterized LOC100505795	ncRNA
3291	UPN3291	chr1	164771930	164773115	chr1:164771930-164773115	1	1	1	0		0		3291	chr1	164771930	164773115	+	0		intron (NR_038072, intron 1 of 3)	intron (NR_038072, intron 1 of 3)	2119	NR_038072	100505795	Hs.661039	NR_038072	ENSG00000233693	LOC100505795	-	uncharacterized LOC100505795	ncRNA
3292	UPN3292	chr1	164774528	164775127	chr1:164774528-164775127	1	1	1	0		0		3292	chr1	164774528	164775127	+	0		promoter-TSS (NR_038072)	promoter-TSS (NR_038072)	-186	NR_038072	100505795	Hs.661039	NR_038072	ENSG00000233693	LOC100505795	-	uncharacterized LOC100505795	ncRNA
3298	UPN3298	chr1	165375794	165376869	chr1:165375794-165376869	1	1	1	0		0		3298	chr1	165375794	165376869	+	0		Intergenic	Intergenic	-19616	NM_177398	4009	Hs.667312	NM_177398	ENSG00000162761	LMX1A	LMX1|LMX1.1	LIM homeobox transcription factor 1 alpha	protein-coding
3299	UPN3299	chr1	165598060	165598823	chr1:165598060-165598823	1	1	1	0		0		3299	chr1	165598060	165598823	+	0		Intergenic	Intergenic	-16286	NR_026744	400794	Hs.374847	NR_026744	ENSG00000237463	LOC400794	-	uncharacterized LOC400794	ncRNA
3300	UPN3300	chr1	165631891	165632583	chr1:165631891-165632583	1	1	1	0		0		3300	chr1	165631891	165632583	+	0		intron (NM_004528, intron 1 of 5)	intron (NM_004528, intron 1 of 5)	1364	NM_004528	4259	Hs.191734	NM_004528	ENSG00000143198	MGST3	GST-III	microsomal glutathione S-transferase 3	protein-coding
3303	UPN3303	chr1	165895865	165900095	chr1:165895865-165900095	3	2	2	0		0		3303	chr1	165895865	165900095	+	0		intron (NM_012474, intron 4 of 6)	intron (NM_012474, intron 4 of 6)	-9941	NR_037431	100500832		NR_037431	ENSG00000283936	MIR3658	-	microRNA 3658	ncRNA
3307	UPN3307	chr1	167090183	167090665	chr1:167090183-167090665	1	1	1	0		0		3307	chr1	167090183	167090665	+	0		5' UTR (NM_005814, exon 1 of 7)	5' UTR (NM_005814, exon 1 of 7)	207	NM_005814	10223	Hs.651244	NM_005814	ENSG00000143167	GPA33	A33	glycoprotein A33	protein-coding
3323	UPN3323	chr1	167600269	167602864	chr1:167600269-167602864	1	1	2	0		0		3323	chr1	167600269	167602864	+	0		Intergenic	Intergenic	-28627	NM_001322924	92241	Hs.493867	NM_052862	ENSG00000198771	RCSD1	CAPZIP|MK2S4	RCSD domain containing 1	protein-coding
3324	UPN3324	chr1	167616433	167619114	chr1:167616433-167619114	1	2	1	0		0		3324	chr1	167616433	167619114	+	0		Intergenic	Intergenic	-12420	NM_001322924	92241	Hs.493867	NM_052862	ENSG00000198771	RCSD1	CAPZIP|MK2S4	RCSD domain containing 1	protein-coding
3325	UPN3325	chr1	167627574	167630101	chr1:167627574-167630101	1	1	1	0		0		3325	chr1	167627574	167630101	+	0		Intergenic	MIRb|SINE|MIR	-1356	NM_001322924	92241	Hs.493867	NM_052862	ENSG00000198771	RCSD1	CAPZIP|MK2S4	RCSD domain containing 1	protein-coding
3328	UPN3328	chr1	167631777	167632628	chr1:167631777-167632628	1	1	1	0		0		3328	chr1	167631777	167632628	+	0		intron (NM_001322923, intron 1 of 5)	intron (NM_001322923, intron 1 of 5)	1965	NM_052862	92241	Hs.493867	NM_052862	ENSG00000198771	RCSD1	CAPZIP|MK2S4	RCSD domain containing 1	protein-coding
3347	UPN3347	chr1	168227333	168229771	chr1:168227333-168229771	1	1	1	0		0		3347	chr1	168227333	168229771	+	0		intron (NM_199344, intron 1 of 7)	intron (NM_199344, intron 1 of 7)	2535	NM_199344	375035	Hs.645435	NM_199344	ENSG00000213064	SFT2D2	UNQ512|dJ747L4.C1.2	SFT2 domain containing 2	protein-coding
3361	UPN3361	chr1	168482083	168483490	chr1:168482083-168483490	1	1	2	0		0		3361	chr1	168482083	168483490	+	0		intron (NR_125956, intron 4 of 4)	MIR|SINE|MIR	12858	NR_125956	101928565	Hs.563806	NR_125956	ENSG00000228697	LOC101928565	-	uncharacterized LOC101928565	ncRNA
3362	UPN3362	chr1	168484126	168485221	chr1:168484126-168485221	1	2	1	0		0		3362	chr1	168484126	168485221	+	0		intron (NR_125956, intron 4 of 4)	intron (NR_125956, intron 4 of 4)	10971	NR_125956	101928565	Hs.563806	NR_125956	ENSG00000228697	LOC101928565	-	uncharacterized LOC101928565	ncRNA
3372	UPN3372	chr1	169108403	169109232	chr1:169108403-169109232	1	1	1	0		0		3372	chr1	169108403	169109232	+	0		intron (NM_001677, intron 1 of 5)	intron (NM_001677, intron 1 of 5)	2108	NM_001677	481	Hs.291196	NM_001677	ENSG00000143153	ATP1B1	ATP1B	ATPase Na+/K+ transporting subunit beta 1	protein-coding
3376	UPN3376	chr1	169113585	169114630	chr1:169113585-169114630	1	1	1	0		0		3376	chr1	169113585	169114630	+	0		intron (NM_001677, intron 2 of 5)	intron (NM_001677, intron 2 of 5)	7398	NM_001677	481	Hs.291196	NM_001677	ENSG00000143153	ATP1B1	ATP1B	ATPase Na+/K+ transporting subunit beta 1	protein-coding
3377	UPN3377	chr1	169115876	169116573	chr1:169115876-169116573	1	1	1	0		0		3377	chr1	169115876	169116573	+	0		intron (NM_001677, intron 2 of 5)	intron (NM_001677, intron 2 of 5)	9515	NM_001677	481	Hs.291196	NM_001677	ENSG00000143153	ATP1B1	ATP1B	ATPase Na+/K+ transporting subunit beta 1	protein-coding
3395	UPN3395	chr1	171654274	171655737	chr1:171654274-171655737	1	1	1	0		0		3395	chr1	171654274	171655737	+	0		Intergenic	MIR3|SINE|MIR	-2372	NM_000261	4653	Hs.436037	NM_000261	ENSG00000034971	MYOC	GLC1A|GPOA|JOAG|JOAG1|TIGR	myocilin	protein-coding
3397	UPN3397	chr1	171743382	171743805	chr1:171743382-171743805	1	1	1	0		0		3397	chr1	171743382	171743805	+	0		Intergenic	FRAM|SINE|Alu	-1354	NR_033704	8674	Hs.6651	NM_003762	ENSG00000117533	VAMP4	VAMP-4|VAMP24	vesicle associated membrane protein 4	protein-coding
3406	UPN3406	chr1	172357288	172359756	chr1:172357288-172359756	1	1	1	0		0		3406	chr1	172357288	172359756	+	0		intron (NM_015569, intron 17 of 20)	intron (NM_015569, intron 17 of 20)	-62166	NM_139240	92346	Hs.517991	NM_139240	ENSG00000180999	C1orf105	-	chromosome 1 open reading frame 105	protein-coding
3407	UPN3407	chr1	172390243	172391559	chr1:172390243-172391559	1	1	1	0		0		3407	chr1	172390243	172391559	+	0		intron (NM_001350206, intron 20 of 20)	intron (NM_001350206, intron 20 of 20)	-29787	NM_139240	92346	Hs.517991	NM_139240	ENSG00000180999	C1orf105	-	chromosome 1 open reading frame 105	protein-coding
3411	UPN3411	chr1	172533776	172534424	chr1:172533776-172534424	1	1	1	0		0		3411	chr1	172533776	172534424	+	0		intron (NM_014283, intron 1 of 23)	intron (NM_014283, intron 1 of 23)	982	NM_001282751	51430	Hs.204559	NM_014283	ENSG00000094975	SUCO	C1orf9|CH1|OPT|SLP1	SUN domain containing ossification factor	protein-coding
3428	UPN3428	chr1	173429360	173430719	chr1:173429360-173430719	1	1	1	0		0		3428	chr1	173429360	173430719	+	0		intron (NR_125960, intron 1 of 1)	intron (NR_125960, intron 1 of 1)	31323	NR_125960	101928673	Hs.674889	NR_125960	ENSG00000203739	LOC101928673	-	uncharacterized LOC101928673	ncRNA
3432	UPN3432	chr1	174022518	174023744	chr1:174022518-174023744	1	1	1	0		0		3432	chr1	174022518	174023744	+	0		Intergenic	Intergenic	-30059	NM_001300851	149041	Hs.30258	NM_172071	ENSG00000135870	RC3H1	RNF198|ROQUIN	ring finger and CCCH-type domains 1	protein-coding
3435	UPN3435	chr1	174963830	174966884	chr1:174963830-174966884	1	1	1	0		0		3435	chr1	174963830	174966884	+	0		intron (NM_001243764, intron 1 of 6)	intron (NM_001243764, intron 1 of 6)	589	NM_001243764	9910	Hs.585378	NM_014857	ENSG00000152061	RABGAP1L	HHL|TBC1D18	RAB GTPase activating protein 1 like	protein-coding
3436	UPN3436	chr1	174967130	174968303	chr1:174967130-174968303	1	1	1	0		0		3436	chr1	174967130	174968303	+	0		intron (NM_001243764, intron 1 of 6)	AluJo|SINE|Alu	2948	NM_001243764	9910	Hs.585378	NM_014857	ENSG00000152061	RABGAP1L	HHL|TBC1D18	RAB GTPase activating protein 1 like	protein-coding
3438	UPN3438	chr1	174998663	174999192	chr1:174998663-174999192	1	1	1	0		0		3438	chr1	174998663	174999192	+	0		promoter-TSS (NM_014412)	promoter-TSS (NM_014412)	-508	NM_001007214	27101	Hs.508524	NM_014412	ENSG00000116161	CACYBP	GIG5|PNAS-107|S100A6BP|SIP	calcyclin binding protein	protein-coding
3439	UPN3439	chr1	175186856	175191836	chr1:175186856-175191836	1	1	2	0		0		3439	chr1	175186856	175191836	+	0		intron (NM_001162894, intron 1 of 3)	MER91A|DNA|hAT-Tip100	3467	NM_001162895	9674	Hs.518138	NM_014656	ENSG00000235750	KIAA0040	-	KIAA0040	protein-coding
3440	UPN3440	chr1	175192941	175193985	chr1:175192941-175193985	1	1	1	0		0		3440	chr1	175192941	175193985	+	0		promoter-TSS (NM_014656)	promoter-TSS (NM_014656)	-370	NM_001162894	9674	Hs.518138	NM_014656	ENSG00000235750	KIAA0040	-	KIAA0040	protein-coding
3443	UPN3443	chr1	176207913	176208478	chr1:176207913-176208478	1	1	1	0		0		3443	chr1	176207913	176208478	+	0		promoter-TSS (NM_022457)	promoter-TSS (NM_022457)	-951	NM_001286644	64326	Hs.523744	NM_022457	ENSG00000143207	COP1	RFWD2|RNF200	COP1, E3 ubiquitin ligase	protein-coding
3445	UPN3445	chr1	178055806	178058950	chr1:178055806-178058950	1	1	2	0		0		3445	chr1	178055806	178058950	+	0		Intergenic	Intergenic	-19371	NR_151488	730102	Hs.733192	NR_037167	ENSG00000242193	CRYZL2P	-	crystallin zeta like 2, pseudogene	pseudo
3449	UPN3449	chr1	178100522	178101608	chr1:178100522-178101608	1	1	1	0		0		3449	chr1	178100522	178101608	+	0		intron (NM_170692, intron 1 of 17)	intron (NM_170692, intron 1 of 17)	-7072	NR_027982	100302401	Hs.736117	NR_027982	ENSG00000224687	RASAL2-AS1	-	RASAL2 antisense RNA 1	ncRNA
3455	UPN3455	chr1	178932602	178935065	chr1:178932602-178935065	2	1	2	0		0		3455	chr1	178932602	178935065	+	0		Intergenic	Intergenic	-62753	NM_004673	9068	Hs.591474	NM_004673	ENSG00000116194	ANGPTL1	ANG3|ANGPT3|ARP1|AngY|UNQ162|dJ595C2.2	angiopoietin like 1	protein-coding
3456	UPN3456	chr1	178937818	178939144	chr1:178937818-178939144	1	1	1	0		0		3456	chr1	178937818	178939144	+	0		Intergenic	Intergenic	-67401	NM_004673	9068	Hs.591474	NM_004673	ENSG00000116194	ANGPTL1	ANG3|ANGPT3|ARP1|AngY|UNQ162|dJ595C2.2	angiopoietin like 1	protein-coding
3458	UPN3458	chr1	179081197	179081756	chr1:179081197-179081756	1	1	1	0		0		3458	chr1	179081197	179081756	+	0		promoter-TSS (NM_022371)	promoter-TSS (NM_022371)	-501	NM_022371	64222	Hs.584957	NM_022371	ENSG00000186283	TOR3A	ADIR|ADIR2	torsin family 3 member A	protein-coding
3472	UPN3472	chr1	179953529	179954245	chr1:179953529-179954245	1	1	1	0		0		3472	chr1	179953529	179954245	+	0		promoter-TSS (NM_014810)	promoter-TSS (NM_014810)	-886	NM_014810	9857	Hs.413045	NM_014810	ENSG00000135837	CEP350	CAP350|GM133	centrosomal protein 350	protein-coding
3477	UPN3477	chr1	180154987	180156885	chr1:180154987-180156885	1	1	1	7	rs35481032,rs3820312,rs3767199,rs3767196,rs3820311,rs3767193,rs3767192	7	rs35481032,rs3820312,rs3767199,rs3767196,rs3820311,rs3767193,rs3767192	3477	chr1	180154987	180156885	+	0		intron (NM_001004128, intron 1 of 12)	intron (NM_001004128, intron 1 of 12)	1103	NM_002826	5768	Hs.744925	NM_002826	ENSG00000116260	QSOX1	Q6|QSCN6	quiescin sulfhydryl oxidase 1	protein-coding
3488	UPN3488	chr1	181032541	181033717	chr1:181032541-181033717	1	1	1	0		0		3488	chr1	181032541	181033717	+	0		promoter-TSS (NM_001531)	promoter-TSS (NM_001531)	-296	NM_001195035	3140	Hs.13500	NM_001531	ENSG00000153029	MR1	HLALS	major histocompatibility complex, class I-related	protein-coding
3492	UPN3492	chr1	181088101	181088565	chr1:181088101-181088565	1	1	1	0		0		3492	chr1	181088101	181088565	+	0		promoter-TSS (NM_016545)	promoter-TSS (NM_016545)	-169	NM_016545	51278	Hs.15725	NM_016545	ENSG00000162783	IER5	SBBI48	immediate early response 5	protein-coding
3493	UPN3493	chr1	181093937	181097304	chr1:181093937-181097304	3	1	2	0		0		3493	chr1	181093937	181097304	+	0		Intergenic	Intergenic	7118	NM_016545	51278	Hs.15725	NM_016545	ENSG00000162783	IER5	SBBI48	immediate early response 5	protein-coding
3497	UPN3497	chr1	181128110	181129479	chr1:181128110-181129479	1	1	1	0		0		3497	chr1	181128110	181129479	+	0		Intergenic	Intergenic	40292	NM_016545	51278	Hs.15725	NM_016545	ENSG00000162783	IER5	SBBI48	immediate early response 5	protein-coding
3499	UPN3499	chr1	181134625	181137001	chr1:181134625-181137001	1	2	1	0		0		3499	chr1	181134625	181137001	+	0		Intergenic	Intergenic	-38671	NR_125966	101928973	Hs.637822	NR_125966	ENSG00000237292	LINC01732	-	long intergenic non-protein coding RNA 1732	ncRNA
3502	UPN3502	chr1	181152060	181153540	chr1:181152060-181153540	1	1	2	0		0		3502	chr1	181152060	181153540	+	0		Intergenic	Intergenic	-21684	NR_125966	101928973	Hs.637822	NR_125966	ENSG00000237292	LINC01732	-	long intergenic non-protein coding RNA 1732	ncRNA
3507	UPN3507	chr1	182143251	182146892	chr1:182143251-182146892	1	1	1	0		0		3507	chr1	182143251	182146892	+	0		Intergenic	Intergenic	-83359	NM_001009992	127665	Hs.684328	NM_001009992	ENSG00000179930	ZNF648	-	zinc finger protein 648	protein-coding
3508	UPN3508	chr1	182147254	182149334	chr1:182147254-182149334	1	2	1	0		0		3508	chr1	182147254	182149334	+	0		Intergenic	Intergenic	-86582	NM_001009992	127665	Hs.684328	NM_001009992	ENSG00000179930	ZNF648	-	zinc finger protein 648	protein-coding
3510	UPN3510	chr1	182163983	182164393	chr1:182163983-182164393	1	1	1	0		0		3510	chr1	182163983	182164393	+	0		Intergenic	Intergenic	-102476	NM_001009992	127665	Hs.684328	NM_001009992	ENSG00000179930	ZNF648	-	zinc finger protein 648	protein-coding
3517	UPN3517	chr1	182207114	182207513	chr1:182207114-182207513	1	1	1	0		0		3517	chr1	182207114	182207513	+	0		intron (NR_104175, intron 2 of 2)	intron (NR_104175, intron 2 of 2)	106748	NR_104175	400799	Hs.634884	NR_104175	ENSG00000228918	LINC01344	GS1-122H1.2	long intergenic non-protein coding RNA 1344	ncRNA
3522	UPN3522	chr1	182392236	182394200	chr1:182392236-182394200	1	2	1	0		0		3522	chr1	182392236	182394200	+	0		Intergenic	Intergenic	-1012	NM_002065	2752	Hs.132016	NM_002065	ENSG00000135821	GLUL	GLNS|GS|PIG43|PIG59	glutamate-ammonia ligase	protein-coding
3526	UPN3526	chr1	182602644	182604460	chr1:182602644-182604460	1	1	1	0		0		3526	chr1	182602644	182604460	+	0		intron (NM_002928, intron 1 of 4)	intron (NM_002928, intron 1 of 4)	861	NM_002928	6004	Hs.413297	NM_002928	ENSG00000143333	RGS16	A28-RGS14|A28-RGS14P|RGS-R	regulator of G protein signaling 16	protein-coding
3528	UPN3528	chr1	182614627	182616050	chr1:182614627-182616050	1	1	1	0		0		3528	chr1	182614627	182616050	+	0		non-coding (NR_036490, exon 1 of 1)	non-coding (NR_036490, exon 1 of 1)	198	NR_036490	284648	Hs.253475	NR_036490	ENSG00000261504	LINC01686	-	long intergenic non-protein coding RNA 1686	ncRNA
3531	UPN3531	chr1	182793342	182794861	chr1:182793342-182794861	1	1	1	0		0		3531	chr1	182793342	182794861	+	0		intron (NM_030769, intron 2 of 12)	intron (NM_030769, intron 2 of 12)	4652	NM_030769	80896	Hs.496969	NM_030769	ENSG00000135838	NPL	C112|C1orf13|NAL|NPL1	N-acetylneuraminate pyruvate lyase	protein-coding
3544	UPN3544	chr1	183234194	183234629	chr1:183234194-183234629	1	1	1	0		0		3544	chr1	183234194	183234629	+	0		exon (NM_018891, exon 15 of 22)	exon (NM_018891, exon 15 of 22)	48372	NM_005562	3918	Hs.591484	NM_005562	ENSG00000058085	LAMC2	B2T|BM600|CSF|EBR2|EBR2A|LAMB2T|LAMNB2	laminin subunit gamma 2	protein-coding
3548	UPN3548	chr1	183278413	183280345	chr1:183278413-183280345	1	1	1	0		0		3548	chr1	183278413	183280345	+	0		intron (NM_170706, intron 7 of 10)	intron (NM_170706, intron 7 of 10)	25495	NM_170706	23057	Hs.497123	NM_015039	ENSG00000157064	NMNAT2	C1orf15|PNAT2	nicotinamide nucleotide adenylyltransferase 2	protein-coding
3549	UPN3549	chr1	183281047	183283351	chr1:183281047-183283351	1	1	1	0		0		3549	chr1	183281047	183283351	+	0		intron (NM_170706, intron 7 of 10)	intron (NM_170706, intron 7 of 10)	22675	NM_170706	23057	Hs.497123	NM_015039	ENSG00000157064	NMNAT2	C1orf15|PNAT2	nicotinamide nucleotide adenylyltransferase 2	protein-coding
3550	UPN3550	chr1	183287606	183288035	chr1:183287606-183288035	1	1	1	0		0		3550	chr1	183287606	183288035	+	0		intron (NM_170706, intron 4 of 10)	intron (NM_170706, intron 4 of 10)	17054	NM_170706	23057	Hs.497123	NM_015039	ENSG00000157064	NMNAT2	C1orf15|PNAT2	nicotinamide nucleotide adenylyltransferase 2	protein-coding
3553	UPN3553	chr1	183291218	183292722	chr1:183291218-183292722	1	1	1	0		0		3553	chr1	183291218	183292722	+	0		intron (NM_170706, intron 3 of 10)	intron (NM_170706, intron 3 of 10)	12904	NM_170706	23057	Hs.497123	NM_015039	ENSG00000157064	NMNAT2	C1orf15|PNAT2	nicotinamide nucleotide adenylyltransferase 2	protein-coding
3554	UPN3554	chr1	183302644	183304968	chr1:183302644-183304968	1	1	1	0		0		3554	chr1	183302644	183304968	+	0		intron (NM_015039, intron 1 of 10)	intron (NM_015039, intron 1 of 10)	1068	NM_170706	23057	Hs.497123	NM_015039	ENSG00000157064	NMNAT2	C1orf15|PNAT2	nicotinamide nucleotide adenylyltransferase 2	protein-coding
3556	UPN3556	chr1	183317985	183318390	chr1:183317985-183318390	1	1	1	0		0		3556	chr1	183317985	183318390	+	0		intron (NM_015039, intron 1 of 10)	intron (NM_015039, intron 1 of 10)	-13313	NM_170706	23057	Hs.497123	NM_015039	ENSG00000157064	NMNAT2	C1orf15|PNAT2	nicotinamide nucleotide adenylyltransferase 2	protein-coding
3558	UPN3558	chr1	183566691	183569446	chr1:183566691-183569446	1	1	2	0		0		3558	chr1	183566691	183569446	+	0		intron (NM_001190789, intron 5 of 12)	intron (NM_001190789, intron 5 of 12)	22536	NM_000433	4688	Hs.587558	NM_000433	ENSG00000116701	NCF2	NCF-2|NOXA2|P67-PHOX|P67PHOX	neutrophil cytosolic factor 2	protein-coding
3560	UPN3560	chr1	183578070	183579458	chr1:183578070-183579458	1	1	1	0		0		3560	chr1	183578070	183579458	+	0		intron (NM_001190789, intron 2 of 12)	intron (NM_001190789, intron 2 of 12)	11840	NM_000433	4688	Hs.587558	NM_000433	ENSG00000116701	NCF2	NCF-2|NOXA2|P67-PHOX|P67PHOX	neutrophil cytosolic factor 2	protein-coding
3562	UPN3562	chr1	183581987	183582937	chr1:183581987-183582937	1	1	1	0		0		3562	chr1	183581987	183582937	+	0		intron (NM_001190789, intron 2 of 12)	intron (NM_001190789, intron 2 of 12)	8142	NM_000433	4688	Hs.587558	NM_000433	ENSG00000116701	NCF2	NCF-2|NOXA2|P67-PHOX|P67PHOX	neutrophil cytosolic factor 2	protein-coding
3564	UPN3564	chr1	183586548	183587215	chr1:183586548-183587215	1	1	1	0		0		3564	chr1	183586548	183587215	+	0		intron (NM_001190789, intron 2 of 12)	intron (NM_001190789, intron 2 of 12)	3723	NM_000433	4688	Hs.587558	NM_000433	ENSG00000116701	NCF2	NCF-2|NOXA2|P67-PHOX|P67PHOX	neutrophil cytosolic factor 2	protein-coding
3566	UPN3566	chr1	183591669	183594416	chr1:183591669-183594416	1	1	1	0		0		3566	chr1	183591669	183594416	+	0		Intergenic	Intergenic	-2121	NM_001127651	4688	Hs.587558	NM_000433	ENSG00000116701	NCF2	NCF-2|NOXA2|P67-PHOX|P67PHOX	neutrophil cytosolic factor 2	protein-coding
3568	UPN3568	chr1	183603373	183604640	chr1:183603373-183604640	1	1	1	0		0		3568	chr1	183603373	183604640	+	0		Intergenic	Intergenic	-13085	NM_001127651	4688	Hs.587558	NM_000433	ENSG00000116701	NCF2	NCF-2|NOXA2|P67-PHOX|P67PHOX	neutrophil cytosolic factor 2	protein-coding
3571	UPN3571	chr1	183608320	183610109	chr1:183608320-183610109	1	1	1	0		0		3571	chr1	183608320	183610109	+	0		Intergenic	Intergenic	-18293	NM_001127651	4688	Hs.587558	NM_000433	ENSG00000116701	NCF2	NCF-2|NOXA2|P67-PHOX|P67PHOX	neutrophil cytosolic factor 2	protein-coding
3575	UPN3575	chr1	183869499	183872466	chr1:183869499-183872466	1	1	1	0		0		3575	chr1	183869499	183872466	+	0		intron (NM_015149, intron 5 of 18)	MIR3|SINE|MIR	65901	NM_001297672	23179	Hs.497148	NM_015149	ENSG00000143344	RGL1	RGL	ral guanine nucleotide dissociation stimulator like 1	protein-coding
3576	UPN3576	chr1	183872741	183874670	chr1:183872741-183874670	1	1	1	0		0		3576	chr1	183872741	183874670	+	0		intron (NM_015149, intron 5 of 18)	intron (NM_015149, intron 5 of 18)	68624	NM_001297672	23179	Hs.497148	NM_015149	ENSG00000143344	RGL1	RGL	ral guanine nucleotide dissociation stimulator like 1	protein-coding
3577	UPN3577	chr1	183875970	183877975	chr1:183875970-183877975	1	1	1	0		0		3577	chr1	183875970	183877975	+	0		intron (NM_015149, intron 5 of 18)	MIRc|SINE|MIR	71891	NM_001297672	23179	Hs.497148	NM_015149	ENSG00000143344	RGL1	RGL	ral guanine nucleotide dissociation stimulator like 1	protein-coding
3579	UPN3579	chr1	183881153	183883992	chr1:183881153-183883992	1	1	2	0		0		3579	chr1	183881153	183883992	+	0		intron (NM_015149, intron 6 of 18)	intron (NM_015149, intron 6 of 18)	77491	NM_001297672	23179	Hs.497148	NM_015149	ENSG00000143344	RGL1	RGL	ral guanine nucleotide dissociation stimulator like 1	protein-coding
3590	UPN3590	chr1	184152461	184154508	chr1:184152461-184154508	1	3	1	0		0		3590	chr1	184152461	184154508	+	0		Intergenic	Intergenic	101833	NM_001127394	116461	Hs.548197	NM_052965	ENSG00000198860	TSEN15	C1orf19|PCH2F|sen15	tRNA splicing endonuclease subunit 15	protein-coding
3593	UPN3593	chr1	184212855	184213575	chr1:184212855-184213575	1	1	1	0		0		3593	chr1	184212855	184213575	+	0		Intergenic	Intergenic	161564	NM_001127394	116461	Hs.548197	NM_052965	ENSG00000198860	TSEN15	C1orf19|PCH2F|sen15	tRNA splicing endonuclease subunit 15	protein-coding
3606	UPN3606	chr1	184534724	184535759	chr1:184534724-184535759	1	1	1	0		0		3606	chr1	184534724	184535759	+	0		intron (NM_030806, intron 3 of 5)	intron (NM_030806, intron 3 of 5)	148225	NM_030806	81563	Hs.497159	NM_030806	ENSG00000116667	C1orf21	PIG13	chromosome 1 open reading frame 21	protein-coding
3607	UPN3607	chr1	184622642	184623073	chr1:184622642-184623073	1	1	1	0		0		3607	chr1	184622642	184623073	+	0		3' UTR (NM_030806, exon 6 of 6)	3' UTR (NM_030806, exon 6 of 6)	132050	NM_025191	80267	Hs.523811	NM_025191	ENSG00000116406	EDEM3	C1orf22	ER degradation enhancing alpha-mannosidase like protein 3	protein-coding
3614	UPN3614	chr1	184866674	184868430	chr1:184866674-184868430	1	1	1	0		0		3614	chr1	184866674	184868430	+	0		intron (NM_052966, intron 5 of 13)	intron (NM_052966, intron 5 of 13)	107034	NM_052966	116496	Hs.518662	NM_052966	ENSG00000135842	FAM129A	C1orf24|GIG39|NIBAN	family with sequence similarity 129 member A	protein-coding
3625	UPN3625	chr1	185338183	185340320	chr1:185338183-185340320	2	1	1	0		0		3625	chr1	185338183	185340320	+	0		Intergenic	Intergenic	-4212	NR_038424	100288079	Hs.131220	NR_038424	ENSG00000261024	GS1-279B7.1	-	microtubule associated protein 1 light chain 3 beta pseudogene	pseudo
3627	UPN3627	chr1	185373871	185375581	chr1:185373871-185375581	2	1	1	0		0		3627	chr1	185373871	185375581	+	0		Intergenic	MIR3|SINE|MIR	-39687	NR_038424	100288079	Hs.131220	NR_038424	ENSG00000261024	GS1-279B7.1	-	microtubule associated protein 1 light chain 3 beta pseudogene	pseudo
3647	UPN3647	chr1	192539258	192540605	chr1:192539258-192540605	1	1	1	0		0		3647	chr1	192539258	192540605	+	0		Intergenic	Intergenic	-35796	NM_002922	5996	Hs.75256	NM_002922	ENSG00000090104	RGS1	1R20|BL34|HEL-S-87|IER1|IR20	regulator of G protein signaling 1	protein-coding
3651	UPN3651	chr1	192806782	192808822	chr1:192806782-192808822	1	1	1	0		0		3651	chr1	192806782	192808822	+	0		Intergenic	Intergenic	-1237	NM_002923	5997	Hs.78944	NM_002923	ENSG00000116741	RGS2	G0S8	regulator of G protein signaling 2	protein-coding
3663	UPN3663	chr1	197775438	197776501	chr1:197775438-197776501	1	1	1	0		0		3663	chr1	197775438	197776501	+	0		promoter-TSS (NM_001300858)	promoter-TSS (NM_001300858)	-476	NM_144977	163486	Hs.125056	NM_019049	ENSG00000213047	DENND1B	C1ORF18|C1orf218|FAM31B	DENN domain containing 1B	protein-coding
3664	UPN3664	chr1	198157988	198159156	chr1:198157988-198159156	1	1	1	0		0		3664	chr1	198157988	198159156	+	0		intron (NM_133494, intron 1 of 9)	intron (NM_133494, intron 1 of 9)	1594	NM_133494	140609	Hs.24119	NM_133494	ENSG00000151414	NEK7	-	NIMA related kinase 7	protein-coding
3690	UPN3690	chr1	198679099	198680332	chr1:198679099-198680332	1	1	1	0		0		3690	chr1	198679099	198680332	+	0		intron (NR_052021, intron 2 of 2)	intron (NR_052021, intron 2 of 2)	40747	NM_080921	5788	Hs.654514	NM_002838	ENSG00000081237	PTPRC	B220|CD45|CD45R|GP180|L-CA|LCA|LY5|T200	protein tyrosine phosphatase, receptor type C	protein-coding
3694	UPN3694	chr1	198775594	198778292	chr1:198775594-198778292	2	1	1	0		0		3694	chr1	198775594	198778292	+	0		Intergenic	Intergenic	82039	NR_029612	406955		NR_029612	ENSG00000207975	MIR181B1	MIRN181B1|mir-181b-1	microRNA 181b-1	ncRNA
3699	UPN3699	chr1	199858231	199858928	chr1:199858231-199858928	1	1	1	0		0		3699	chr1	199858231	199858928	+	0		Intergenic	Intergenic	-169023	NM_003822	2494	Hs.33446	NM_003822	ENSG00000116833	NR5A2	B1F|B1F2|CPF|FTF|FTZ-F1|FTZ-F1beta|LRH-1|LRH1|hB1F-2	nuclear receptor subfamily 5 group A member 2	protein-coding
3701	UPN3701	chr1	200039018	200043070	chr1:200039018-200043070	2	2	2	0		0		3701	chr1	200039018	200043070	+	0		intron (NM_205860, intron 2 of 7)	intron (NM_205860, intron 2 of 7)	-1781	NM_001276464	2494	Hs.33446	NM_003822	ENSG00000116833	NR5A2	B1F|B1F2|CPF|FTF|FTZ-F1|FTZ-F1beta|LRH-1|LRH1|hB1F-2	nuclear receptor subfamily 5 group A member 2	protein-coding
3716	UPN3716	chr1	201017444	201018857	chr1:201017444-201018857	2	1	1	0		0		3716	chr1	201017444	201018857	+	0		intron (NM_017596, intron 1 of 33)	intron (NM_017596, intron 1 of 33)	5550	NM_001252103	23046	Hs.169182	NM_017596	ENSG00000116852	KIF21B	-	kinesin family member 21B	protein-coding
3717	UPN3717	chr1	201019262	201023457	chr1:201019262-201023457	1	1	1	0		0		3717	chr1	201019262	201023457	+	0		intron (NM_017596, intron 1 of 33)	intron (NM_017596, intron 1 of 33)	2341	NM_001252103	23046	Hs.169182	NM_017596	ENSG00000116852	KIF21B	-	kinesin family member 21B	protein-coding
3724	UPN3724	chr1	201461374	201462455	chr1:201461374-201462455	1	1	1	0		0		3724	chr1	201461374	201462455	+	0		Intergenic	Intergenic	7257	NR_073080	23612	Hs.153944	NM_012396	ENSG00000174307	PHLDA3	TIH1	pleckstrin homology like domain family A member 3	protein-coding
3725	UPN3725	chr1	201467589	201469205	chr1:201467589-201469205	1	1	1	0		0		3725	chr1	201467589	201469205	+	0		non-coding (NR_073080, exon 1 of 3)	non-coding (NR_073080, exon 1 of 3)	774	NR_073080	23612	Hs.153944	NM_012396	ENSG00000174307	PHLDA3	TIH1	pleckstrin homology like domain family A member 3	protein-coding
3729	UPN3729	chr1	201488867	201496955	chr1:201488867-201496955	2	3	6	0		0		3729	chr1	201488867	201496955	+	0		intron (NM_001193571, intron 2 of 5)	intron (NM_001193571, intron 2 of 5)	3662	NM_001193572	1465	Hs.108080	NM_004078	ENSG00000159176	CSRP1	CRP|CRP1|CSRP|CYRP|D1S181E|HEL-141|HEL-S-286	cysteine and glycine rich protein 1	protein-coding
3730	UPN3730	chr1	201498071	201509119	chr1:201498071-201509119	2	1	4	0		0		3730	chr1	201498071	201509119	+	0		intron (NM_001193570, intron 1 of 5)	intron (NM_001193570, intron 1 of 5)	3244	NM_001193571	1465	Hs.108080	NM_004078	ENSG00000159176	CSRP1	CRP|CRP1|CSRP|CYRP|D1S181E|HEL-141|HEL-S-286	cysteine and glycine rich protein 1	protein-coding
3731	UPN3731	chr1	201511678	201512421	chr1:201511678-201512421	1	1	1	0		0		3731	chr1	201511678	201512421	+	0		Intergenic	Intergenic	-4790	NM_001193570	1465	Hs.108080	NM_004078	ENSG00000159176	CSRP1	CRP|CRP1|CSRP|CYRP|D1S181E|HEL-141|HEL-S-286	cysteine and glycine rich protein 1	protein-coding
3734	UPN3734	chr1	201534767	201537344	chr1:201534767-201537344	1	1	1	0		0		3734	chr1	201534767	201537344	+	0		Intergenic	Intergenic	16151	NR_026667	376693	Hs.605989	NR_026667		RPS10P7	RPS10_2_147	ribosomal protein S10 pseudogene 7	pseudo
3735	UPN3735	chr1	201537794	201540624	chr1:201537794-201540624	1	1	1	0		0		3735	chr1	201537794	201540624	+	0		Intergenic	CpG	19305	NR_026667	376693	Hs.605989	NR_026667		RPS10P7	RPS10_2_147	ribosomal protein S10 pseudogene 7	pseudo
3739	UPN3739	chr1	201562234	201562737	chr1:201562234-201562737	1	1	1	0		0		3739	chr1	201562234	201562737	+	0		Intergenic	Intergenic	42581	NR_026667	376693	Hs.605989	NR_026667		RPS10P7	RPS10_2_147	ribosomal protein S10 pseudogene 7	pseudo
3741	UPN3741	chr1	201597998	201600504	chr1:201597998-201600504	1	1	1	0		0		3741	chr1	201597998	201600504	+	0		Intergenic	Intergenic	-49071	NM_020443	89796	Hs.585374	NM_020443	ENSG00000134369	NAV1	POMFIL3|STEERIN1|UNC53H1	neuron navigator 1	protein-coding
3747	UPN3747	chr1	201648840	201650845	chr1:201648840-201650845	1	1	1	0		0		3747	chr1	201648840	201650845	+	0		intron (NM_020443, intron 1 of 29)	CpG	1520	NM_020443	89796	Hs.585374	NM_020443	ENSG00000134369	NAV1	POMFIL3|STEERIN1|UNC53H1	neuron navigator 1	protein-coding
3748	UPN3748	chr1	201703240	201704397	chr1:201703240-201704397	1	1	1	0		0		3748	chr1	201703240	201704397	+	0		intron (NR_046696, intron 2 of 2)	intron (NR_046696, intron 2 of 2)	-15690	NR_049823	100847050		NR_049823	ENSG00000264802	MIR5191	-	microRNA 5191	ncRNA
3750	UPN3750	chr1	201710417	201721766	chr1:201710417-201721766	3	2	2	0		0		3750	chr1	201710417	201721766	+	0		intron (NM_020443, intron 2 of 29)	intron (NM_020443, intron 2 of 29)	-3417	NR_049823	100847050		NR_049823	ENSG00000264802	MIR5191	-	microRNA 5191	ncRNA
3752	UPN3752	chr1	201724279	201724774	chr1:201724279-201724774	1	1	1	0		0		3752	chr1	201724279	201724774	+	0		intron (NM_020443, intron 3 of 29)	intron (NM_020443, intron 3 of 29)	5018	NR_049823	100847050		NR_049823	ENSG00000264802	MIR5191	-	microRNA 5191	ncRNA
3754	UPN3754	chr1	201739134	201741177	chr1:201739134-201741177	1	1	1	0		0		3754	chr1	201739134	201741177	+	0		intron (NM_001167738, intron 1 of 26)	CpG	320	NM_001167738	89796	Hs.585374	NM_020443	ENSG00000134369	NAV1	POMFIL3|STEERIN1|UNC53H1	neuron navigator 1	protein-coding
3760	UPN3760	chr1	201789218	201793048	chr1:201789218-201793048	1	1	1	0		0		3760	chr1	201789218	201793048	+	0		intron (NM_001167738, intron 11 of 26)	intron (NM_001167738, intron 11 of 26)	-17478	NR_031599	100302158		NR_031599	ENSG00000221028	MIR1231	MIRN1231|hsa-mir-1231	microRNA 1231	ncRNA
3765	UPN3765	chr1	201896682	201899115	chr1:201896682-201899115	2	1	2	0		0		3765	chr1	201896682	201899115	+	0		3' UTR (NM_012134, exon 3 of 3)	3' UTR (NM_012134, exon 3 of 3)	9221	NM_198149	149345	Hs.632471	NM_198149	ENSG00000198892	SHISA4	C1orf40|TMEM58	shisa family member 4	protein-coding
3767	UPN3767	chr1	201902370	201909235	chr1:201902370-201909235	3	1	4	0		0		3767	chr1	201902370	201909235	+	0		intron (NM_012134, intron 1 of 2)	intron (NM_012134, intron 1 of 2)	17125	NM_198149	149345	Hs.632471	NM_198149	ENSG00000198892	SHISA4	C1orf40|TMEM58	shisa family member 4	protein-coding
3768	UPN3768	chr1	201911815	201918807	chr1:201911815-201918807	2	2	1	0		0		3768	chr1	201911815	201918807	+	0		intron (NM_012134, intron 1 of 2)	L2|LINE|L2	26634	NM_198149	149345	Hs.632471	NM_198149	ENSG00000198892	SHISA4	C1orf40|TMEM58	shisa family member 4	protein-coding
3774	UPN3774	chr1	202132035	202133417	chr1:202132035-202133417	1	1	1	0		0		3774	chr1	202132035	202133417	+	0		TTS (NM_138795)	TTS (NM_138795)	9885	NM_004767	9283	Hs.132049	NM_004767	ENSG00000170075	GPR37L1	ET(B)R-LP-2|ETBR-LP-2|ETBRLP2	G protein-coupled receptor 37 like 1	protein-coding
3777	UPN3777	chr1	202158989	202164895	chr1:202158989-202164895	1	2	2	0		0		3777	chr1	202158989	202164895	+	0		promoter-TSS (NR_037663)	promoter-TSS (NR_037663)	-354	NM_002832	5778	Hs.402773	NM_002832	ENSG00000143851	PTPN7	BPTP-4|HEPTP|LC-PTP|LPTP|PTPNI	protein tyrosine phosphatase, non-receptor type 7	protein-coding
3784	UPN3784	chr1	202578302	202580494	chr1:202578302-202580494	1	1	1	0		0		3784	chr1	202578302	202580494	+	0		intron (NM_032104, intron 12 of 12)	intron (NM_032104, intron 12 of 12)	39284	NM_001197131	4660	Hs.444403	NM_002481	ENSG00000077157	PPP1R12B	MYPT2|PP1bp55	protein phosphatase 1 regulatory subunit 12B	protein-coding
3785	UPN3785	chr1	202586053	202586852	chr1:202586053-202586852	1	1	1	0		0		3785	chr1	202586053	202586852	+	0		3' UTR (NM_001331029, exon 25 of 25)	3' UTR (NM_001331029, exon 25 of 25)	46338	NM_001197131	4660	Hs.444403	NM_002481	ENSG00000077157	PPP1R12B	MYPT2|PP1bp55	protein phosphatase 1 regulatory subunit 12B	protein-coding
3786	UPN3786	chr1	202587433	202591807	chr1:202587433-202591807	4	1	2	0		0		3786	chr1	202587433	202591807	+	0		TTS (NM_177402)	TTS (NM_177402)	49506	NM_001197131	4660	Hs.444403	NM_002481	ENSG00000077157	PPP1R12B	MYPT2|PP1bp55	protein phosphatase 1 regulatory subunit 12B	protein-coding
3796	UPN3796	chr1	202966057	202967174	chr1:202966057-202967174	1	1	1	0		0		3796	chr1	202966057	202967174	+	0		intron (NM_016243, intron 2 of 8)	intron (NM_016243, intron 2 of 8)	661	NM_016243	51706	Hs.334832	NM_016243	ENSG00000159348	CYB5R1	B5R.1|B5R1|B5R2|NQO3A2|humb5R2	cytochrome b5 reductase 1	protein-coding
3797	UPN3797	chr1	202967792	202969481	chr1:202967792-202969481	1	1	1	0		0		3797	chr1	202967792	202969481	+	0		Intergenic	Intergenic	-1360	NM_016243	51706	Hs.334832	NM_016243	ENSG00000159348	CYB5R1	B5R.1|B5R1|B5R2|NQO3A2|humb5R2	cytochrome b5 reductase 1	protein-coding
3803	UPN3803	chr1	203199625	203203251	chr1:203199625-203203251	1	2	1	0		0		3803	chr1	203199625	203203251	+	0		Intergenic	L2b|LINE|L2	-14644	NM_001276	1116	Hs.382202	NM_001276	ENSG00000133048	CHI3L1	ASRT7|CGP-39|GP-39|GP39|HC-gp39|HCGP-3P|YKL-40|YKL40|YYL-40|hCGP-39	chitinase 3 like 1	protein-coding
3804	UPN3804	chr1	203267586	203268018	chr1:203267586-203268018	1	1	1	0		0		3804	chr1	203267586	203268018	+	0		Intergenic	Intergenic	-19350	NR_117097	100506775	Hs.443859	NR_117097	ENSG00000231507	LINC01353	-	long intergenic non-protein coding RNA 1353	ncRNA
3805	UPN3805	chr1	203272977	203276129	chr1:203272977-203276129	1	1	1	0		0		3805	chr1	203272977	203276129	+	0		Intergenic	MIRb|SINE|MIR	-12599	NR_117097	100506775	Hs.443859	NR_117097	ENSG00000231507	LINC01353	-	long intergenic non-protein coding RNA 1353	ncRNA
3806	UPN3806	chr1	203276573	203281516	chr1:203276573-203281516	2	1	1	0		0		3806	chr1	203276573	203281516	+	0		Intergenic	L2b|LINE|L2	-8108	NR_117097	100506775	Hs.443859	NR_117097	ENSG00000231507	LINC01353	-	long intergenic non-protein coding RNA 1353	ncRNA
3808	UPN3808	chr1	203283862	203292141	chr1:203283862-203292141	1	3	2	0		0		3808	chr1	203283862	203292141	+	0		non-coding (NR_117097, exon 2 of 3)	non-coding (NR_117097, exon 2 of 3)	301	NR_117098	100506775	Hs.443859	NR_117097	ENSG00000231507	LINC01353	-	long intergenic non-protein coding RNA 1353	ncRNA
3809	UPN3809	chr1	203303943	203305293	chr1:203303943-203305293	1	2	1	0		0		3809	chr1	203303943	203305293	+	0		promoter-TSS (NM_006763)	promoter-TSS (NM_006763)	707	NR_034150	730227	Hs.293928	NR_034150	ENSG00000233791	LINC01136	-	long intergenic non-protein coding RNA 1136	ncRNA
3810	UPN3810	chr1	203307072	203309248	chr1:203307072-203309248	1	2	1	0		0		3810	chr1	203307072	203309248	+	0		3' UTR (NM_006763, exon 2 of 2)	3' UTR (NM_006763, exon 2 of 2)	2624	NM_006763	7832	Hs.519162	NM_006763	ENSG00000159388	BTG2	APRO1|PC3|TIS21	BTG anti-proliferation factor 2	protein-coding
3811	UPN3811	chr1	203320127	203328413	chr1:203320127-203328413	1	1	2	0		0		3811	chr1	203320127	203328413	+	0		Intergenic	Intergenic	18734	NM_006763	7832	Hs.519162	NM_006763	ENSG00000159388	BTG2	APRO1|PC3|TIS21	BTG anti-proliferation factor 2	protein-coding
3812	UPN3812	chr1	203378649	203380962	chr1:203378649-203380962	1	1	1	0		0		3812	chr1	203378649	203380962	+	0		Intergenic	Intergenic	-28376	NM_002023	2331	Hs.519168	NM_002023	ENSG00000122176	FMOD	FM|SLRR2E	fibromodulin	protein-coding
3814	UPN3814	chr1	203402869	203403840	chr1:203402869-203403840	1	1	1	0		0		3814	chr1	203402869	203403840	+	0		Intergenic	Intergenic	-51925	NM_002023	2331	Hs.519168	NM_002023	ENSG00000122176	FMOD	FM|SLRR2E	fibromodulin	protein-coding
3816	UPN3816	chr1	203405940	203407518	chr1:203405940-203407518	1	1	1	0		0		3816	chr1	203405940	203407518	+	0		Intergenic	Intergenic	-55300	NM_002023	2331	Hs.519168	NM_002023	ENSG00000122176	FMOD	FM|SLRR2E	fibromodulin	protein-coding
3817	UPN3817	chr1	203408089	203409396	chr1:203408089-203409396	1	1	1	0		0		3817	chr1	203408089	203409396	+	0		Intergenic	Intergenic	-57313	NM_002023	2331	Hs.519168	NM_002023	ENSG00000122176	FMOD	FM|SLRR2E	fibromodulin	protein-coding
3820	UPN3820	chr1	203448174	203448839	chr1:203448174-203448839	1	1	1	0		0		3820	chr1	203448174	203448839	+	0		Intergenic	Intergenic	-27249	NM_201348	5549	Hs.632481	NM_002725	ENSG00000188783	PRELP	MST161|MSTP161|SLRR2A	proline and arginine rich end leucine rich repeat protein	protein-coding
3822	UPN3822	chr1	203463204	203467999	chr1:203463204-203467999	1	1	1	0		0		3822	chr1	203463204	203467999	+	0		Intergenic	Intergenic	-10154	NM_201348	5549	Hs.632481	NM_002725	ENSG00000188783	PRELP	MST161|MSTP161|SLRR2A	proline and arginine rich end leucine rich repeat protein	protein-coding
3824	UPN3824	chr1	203480277	203481183	chr1:203480277-203481183	1	1	1	0		0		3824	chr1	203480277	203481183	+	0		intron (NM_002725, intron 1 of 2)	intron (NM_002725, intron 1 of 2)	4975	NM_002725	5549	Hs.632481	NM_002725	ENSG00000188783	PRELP	MST161|MSTP161|SLRR2A	proline and arginine rich end leucine rich repeat protein	protein-coding
3826	UPN3826	chr1	203486582	203488558	chr1:203486582-203488558	1	1	1	0		0		3826	chr1	203486582	203488558	+	0		3' UTR (NM_201348, exon 3 of 3)	3' UTR (NM_201348, exon 3 of 3)	-6573	NM_014359	26254	Hs.632468	NM_014359	ENSG00000188770	OPTC	OPT	opticin	protein-coding
3828	UPN3828	chr1	203506656	203509408	chr1:203506656-203509408	2	1	2	0		0		3828	chr1	203506656	203509408	+	0		intron (NM_014359, intron 7 of 7)	MIRc|SINE|MIR	13889	NM_014359	26254	Hs.632468	NM_014359	ENSG00000188770	OPTC	OPT	opticin	protein-coding
3830	UPN3830	chr1	203511416	203514707	chr1:203511416-203514707	1	1	1	0		0		3830	chr1	203511416	203514707	+	0		Intergenic	Intergenic	18918	NM_014359	26254	Hs.632468	NM_014359	ENSG00000188770	OPTC	OPT	opticin	protein-coding
3837	UPN3837	chr1	203536713	203538102	chr1:203536713-203538102	1	1	1	0		0		3837	chr1	203536713	203538102	+	0		Intergenic	L2|LINE|L2	43264	NM_014359	26254	Hs.632468	NM_014359	ENSG00000188770	OPTC	OPT	opticin	protein-coding
3839	UPN3839	chr1	203555157	203559894	chr1:203555157-203559894	2	2	4	0		0		3839	chr1	203555157	203559894	+	0		Intergenic	Intergenic	63382	NM_014359	26254	Hs.632468	NM_014359	ENSG00000188770	OPTC	OPT	opticin	protein-coding
3841	UPN3841	chr1	203590722	203592445	chr1:203590722-203592445	1	1	1	0		0		3841	chr1	203590722	203592445	+	0		Intergenic	Intergenic	-35204	NM_001001396	493	Hs.343522	NM_001684	ENSG00000058668	ATP2B4	ATP2B2|MXRA1|PMCA4|PMCA4b|PMCA4x	ATPase plasma membrane Ca2+ transporting 4	protein-coding
3842	UPN3842	chr1	203597970	203599469	chr1:203597970-203599469	1	1	1	0		0		3842	chr1	203597970	203599469	+	0		Intergenic	Intergenic	-28068	NM_001001396	493	Hs.343522	NM_001684	ENSG00000058668	ATP2B4	ATP2B2|MXRA1|PMCA4|PMCA4b|PMCA4x	ATPase plasma membrane Ca2+ transporting 4	protein-coding
3843	UPN3843	chr1	203600378	203601601	chr1:203600378-203601601	1	1	1	0		0		3843	chr1	203600378	203601601	+	0		Intergenic	Intergenic	-25798	NM_001001396	493	Hs.343522	NM_001684	ENSG00000058668	ATP2B4	ATP2B2|MXRA1|PMCA4|PMCA4b|PMCA4x	ATPase plasma membrane Ca2+ transporting 4	protein-coding
3846	UPN3846	chr1	203625393	203626891	chr1:203625393-203626891	2	1	1	0		0		3846	chr1	203625393	203626891	+	0		promoter-TSS (NM_001684)	promoter-TSS (NM_001684)	-645	NM_001001396	493	Hs.343522	NM_001684	ENSG00000058668	ATP2B4	ATP2B2|MXRA1|PMCA4|PMCA4b|PMCA4x	ATPase plasma membrane Ca2+ transporting 4	protein-coding
3847	UPN3847	chr1	203628015	203631956	chr1:203628015-203631956	1	1	1	0		0		3847	chr1	203628015	203631956	+	0		intron (NM_001001396, intron 1 of 21)	intron (NM_001001396, intron 1 of 21)	3198	NM_001684	493	Hs.343522	NM_001684	ENSG00000058668	ATP2B4	ATP2B2|MXRA1|PMCA4|PMCA4b|PMCA4x	ATPase plasma membrane Ca2+ transporting 4	protein-coding
3848	UPN3848	chr1	203635573	203636523	chr1:203635573-203636523	1	1	1	0		0		3848	chr1	203635573	203636523	+	0		intron (NM_001001396, intron 1 of 21)	intron (NM_001001396, intron 1 of 21)	9261	NM_001684	493	Hs.343522	NM_001684	ENSG00000058668	ATP2B4	ATP2B2|MXRA1|PMCA4|PMCA4b|PMCA4x	ATPase plasma membrane Ca2+ transporting 4	protein-coding
3852	UPN3852	chr1	203642695	203644047	chr1:203642695-203644047	1	1	2	0		0		3852	chr1	203642695	203644047	+	0		intron (NM_001001396, intron 1 of 21)	intron (NM_001001396, intron 1 of 21)	16584	NM_001684	493	Hs.343522	NM_001684	ENSG00000058668	ATP2B4	ATP2B2|MXRA1|PMCA4|PMCA4b|PMCA4x	ATPase plasma membrane Ca2+ transporting 4	protein-coding
3853	UPN3853	chr1	203644397	203645472	chr1:203644397-203645472	1	1	1	0		0		3853	chr1	203644397	203645472	+	0		intron (NM_001001396, intron 1 of 21)	intron (NM_001001396, intron 1 of 21)	18147	NM_001684	493	Hs.343522	NM_001684	ENSG00000058668	ATP2B4	ATP2B2|MXRA1|PMCA4|PMCA4b|PMCA4x	ATPase plasma membrane Ca2+ transporting 4	protein-coding
3855	UPN3855	chr1	203649453	203651812	chr1:203649453-203651812	2	1	1	0		0		3855	chr1	203649453	203651812	+	0		intron (NM_001001396, intron 1 of 21)	intron (NM_001001396, intron 1 of 21)	23845	NM_001684	493	Hs.343522	NM_001684	ENSG00000058668	ATP2B4	ATP2B2|MXRA1|PMCA4|PMCA4b|PMCA4x	ATPase plasma membrane Ca2+ transporting 4	protein-coding
3858	UPN3858	chr1	203662310	203674546	chr1:203662310-203674546	2	2	4	0		0		3858	chr1	203662310	203674546	+	0		intron (NM_001001396, intron 1 of 21)	intron (NM_001001396, intron 1 of 21)	41641	NM_001684	493	Hs.343522	NM_001684	ENSG00000058668	ATP2B4	ATP2B2|MXRA1|PMCA4|PMCA4b|PMCA4x	ATPase plasma membrane Ca2+ transporting 4	protein-coding
3859	UPN3859	chr1	203674902	203676700	chr1:203674902-203676700	1	2	1	0		0		3859	chr1	203674902	203676700	+	0		intron (NM_001001396, intron 1 of 21)	intron (NM_001001396, intron 1 of 21)	49014	NM_001684	493	Hs.343522	NM_001684	ENSG00000058668	ATP2B4	ATP2B2|MXRA1|PMCA4|PMCA4b|PMCA4x	ATPase plasma membrane Ca2+ transporting 4	protein-coding
3860	UPN3860	chr1	203682141	203683438	chr1:203682141-203683438	2	1	1	0		0		3860	chr1	203682141	203683438	+	0		5' UTR (NM_001684, exon 2 of 21)	5' UTR (NM_001684, exon 2 of 21)	-46792	NR_003019	677843	Hs.676135	NR_003019	ENSG00000221643	SNORA77	ACA63|SNORA77A	small nucleolar RNA, H/ACA box 77	snoRNA
3863	UPN3863	chr1	203692160	203695959	chr1:203692160-203695959	1	2	2	0		0		3863	chr1	203692160	203695959	+	0		intron (NM_001001396, intron 2 of 21)	MIRb|SINE|MIR	-35522	NR_003019	677843	Hs.676135	NR_003019	ENSG00000221643	SNORA77	ACA63|SNORA77A	small nucleolar RNA, H/ACA box 77	snoRNA
3871	UPN3871	chr1	204073211	204075708	chr1:204073211-204075708	1	1	1	0		0		3871	chr1	204073211	204075708	+	0		intron (NM_005686, intron 1 of 13)	CpG	1341	NM_005686	9580	Hs.201671	NM_005686	ENSG00000143842	SOX13	ICA12|Sox-13	SRY-box 13	protein-coding
3873	UPN3873	chr1	204078142	204078889	chr1:204078142-204078889	1	1	1	0		0		3873	chr1	204078142	204078889	+	0		intron (NM_005686, intron 1 of 13)	intron (NM_005686, intron 1 of 13)	5397	NM_005686	9580	Hs.201671	NM_005686	ENSG00000143842	SOX13	ICA12|Sox-13	SRY-box 13	protein-coding
3874	UPN3874	chr1	204079567	204080880	chr1:204079567-204080880	1	1	1	0		0		3874	chr1	204079567	204080880	+	0		intron (NM_005686, intron 1 of 13)	intron (NM_005686, intron 1 of 13)	7105	NM_005686	9580	Hs.201671	NM_005686	ENSG00000143842	SOX13	ICA12|Sox-13	SRY-box 13	protein-coding
3877	UPN3877	chr1	204087185	204090298	chr1:204087185-204090298	1	1	1	0		0		3877	chr1	204087185	204090298	+	0		intron (NM_005686, intron 1 of 13)	intron (NM_005686, intron 1 of 13)	15623	NM_005686	9580	Hs.201671	NM_005686	ENSG00000143842	SOX13	ICA12|Sox-13	SRY-box 13	protein-coding
3879	UPN3879	chr1	204103661	204104889	chr1:204103661-204104889	1	1	1	0		0		3879	chr1	204103661	204104889	+	0		intron (NM_005686, intron 1 of 13)	intron (NM_005686, intron 1 of 13)	31157	NM_005686	9580	Hs.201671	NM_005686	ENSG00000143842	SOX13	ICA12|Sox-13	SRY-box 13	protein-coding
3882	UPN3882	chr1	204286862	204287783	chr1:204286862-204287783	1	1	1	0		0		3882	chr1	204286862	204287783	+	0		intron (NM_014935, intron 1 of 22)	intron (NM_014935, intron 1 of 22)	72607	NM_014935	22874	Hs.253146	NM_014935	ENSG00000143850	PLEKHA6	PEPP-3|PEPP3	pleckstrin homology domain containing A6	protein-coding
3884	UPN3884	chr1	204348341	204349264	chr1:204348341-204349264	1	1	1	0		0		3884	chr1	204348341	204349264	+	0		intron (NM_014935, intron 1 of 22)	intron (NM_014935, intron 1 of 22)	11127	NM_014935	22874	Hs.253146	NM_014935	ENSG00000143850	PLEKHA6	PEPP-3|PEPP3	pleckstrin homology domain containing A6	protein-coding
3886	UPN3886	chr1	204363289	204363803	chr1:204363289-204363803	1	1	1	0		0		3886	chr1	204363289	204363803	+	0		Intergenic	Intergenic	-3617	NM_014935	22874	Hs.253146	NM_014935	ENSG00000143850	PLEKHA6	PEPP-3|PEPP3	pleckstrin homology domain containing A6	protein-coding
3888	UPN3888	chr1	204412832	204413732	chr1:204412832-204413732	1	1	1	0		0		3888	chr1	204412832	204413732	+	0		Intergenic	Intergenic	-1465	NM_032833	84919	Hs.304376	NM_032833	ENSG00000158615	PPP1R15B	CREP|MSSGM2	protein phosphatase 1 regulatory subunit 15B	protein-coding
3889	UPN3889	chr1	204417291	204419097	chr1:204417291-204419097	2	1	1	0		0		3889	chr1	204417291	204419097	+	0		Intergenic	L2c|LINE|L2	-6377	NM_032833	84919	Hs.304376	NM_032833	ENSG00000158615	PPP1R15B	CREP|MSSGM2	protein phosphatase 1 regulatory subunit 15B	protein-coding
3895	UPN3895	chr1	204439676	204440483	chr1:204439676-204440483	1	1	1	0		0		3895	chr1	204439676	204440483	+	0		intron (NM_002646, intron 23 of 33)	intron (NM_002646, intron 23 of 33)	-28262	NM_032833	84919	Hs.304376	NM_032833	ENSG00000158615	PPP1R15B	CREP|MSSGM2	protein phosphatase 1 regulatory subunit 15B	protein-coding
3899	UPN3899	chr1	204460425	204462642	chr1:204460425-204462642	2	1	1	0		0		3899	chr1	204460425	204462642	+	0		intron (NM_002646, intron 6 of 33)	intron (NM_002646, intron 6 of 33)	28813	NM_002646	5287	Hs.497487	NM_002646	ENSG00000133056	PIK3C2B	C2-PI3K	phosphatidylinositol-4-phosphate 3-kinase catalytic subunit type 2 beta	protein-coding
3900	UPN3900	chr1	204463108	204464859	chr1:204463108-204464859	1	1	1	0		0		3900	chr1	204463108	204464859	+	0		intron (NM_002646, intron 6 of 33)	intron (NM_002646, intron 6 of 33)	26363	NM_002646	5287	Hs.497487	NM_002646	ENSG00000133056	PIK3C2B	C2-PI3K	phosphatidylinositol-4-phosphate 3-kinase catalytic subunit type 2 beta	protein-coding
3901	UPN3901	chr1	204465218	204467423	chr1:204465218-204467423	1	2	1	0		0		3901	chr1	204465218	204467423	+	0		intron (NM_002646, intron 3 of 33)	intron (NM_002646, intron 3 of 33)	24026	NM_002646	5287	Hs.497487	NM_002646	ENSG00000133056	PIK3C2B	C2-PI3K	phosphatidylinositol-4-phosphate 3-kinase catalytic subunit type 2 beta	protein-coding
3904	UPN3904	chr1	204492500	204495305	chr1:204492500-204495305	1	1	1	0		0		3904	chr1	204492500	204495305	+	0		Intergenic	Intergenic	-3556	NM_002646	5287	Hs.497487	NM_002646	ENSG00000133056	PIK3C2B	C2-PI3K	phosphatidylinositol-4-phosphate 3-kinase catalytic subunit type 2 beta	protein-coding
3908	UPN3908	chr1	204513667	204515166	chr1:204513667-204515166	1	1	1	0		0		3908	chr1	204513667	204515166	+	0		Intergenic	AluJo|SINE|Alu	-1963	NM_001278517	4194	Hs.497492	NM_002393	ENSG00000198625	MDM4	HDMX|MDMX|MRP1	MDM4, p53 regulator	protein-coding
3909	UPN3909	chr1	204515660	204516246	chr1:204515660-204516246	1	1	1	0		0		3909	chr1	204515660	204516246	+	0		promoter-TSS (NM_001204172)	promoter-TSS (NM_001204172)	-426	NM_001278517	4194	Hs.497492	NM_002393	ENSG00000198625	MDM4	HDMX|MDMX|MRP1	MDM4, p53 regulator	protein-coding
3914	UPN3914	chr1	204821842	204822407	chr1:204821842-204822407	1	1	1	0		0		3914	chr1	204821842	204822407	+	0		Intergenic	MER3|DNA|hAT-Charlie	-6530	NM_001005389	23114	Hs.13349	NM_015090	ENSG00000163531	NFASC	NF|NRCAML	neurofascin	protein-coding
3926	UPN3926	chr1	205175076	205176249	chr1:205175076-205176249	1	1	1	0		0		3926	chr1	205175076	205176249	+	0		intron (NM_015375, intron 2 of 12)	intron (NM_015375, intron 2 of 12)	35937	NM_015375	25778	Hs.6874	NM_015375	ENSG00000133059	DSTYK	CAKUT1|DustyPK|HDCMD38P|RIP5|RIPK5|SPG23	dual serine/threonine and tyrosine protein kinase	protein-coding
3930	UPN3930	chr1	205283779	205288612	chr1:205283779-205288612	1	1	1	0		0		3930	chr1	205283779	205288612	+	0		Intergenic	Charlie4z|DNA|hAT-Charlie	28998	NM_001331034	9911	Hs.6360	NM_014858	ENSG00000133069	TMCC2	HUCEP11	transmembrane and coiled-coil domain family 2	protein-coding
3931	UPN3931	chr1	205293678	205295374	chr1:205293678-205295374	1	2	1	0		0		3931	chr1	205293678	205295374	+	0		Intergenic	Intergenic	27265	NM_030952	81788	Hs.497512	NM_030952	ENSG00000163545	NUAK2	SNARK	NUAK family kinase 2	protein-coding
3932	UPN3932	chr1	205297925	205299187	chr1:205297925-205299187	1	2	2	0		0		3932	chr1	205297925	205299187	+	0		Intergenic	Intergenic	23235	NM_030952	81788	Hs.497512	NM_030952	ENSG00000163545	NUAK2	SNARK	NUAK family kinase 2	protein-coding
3933	UPN3933	chr1	205301103	205302538	chr1:205301103-205302538	1	1	1	0		0		3933	chr1	205301103	205302538	+	0		TTS (NM_030952)	TTS (NM_030952)	19971	NM_030952	81788	Hs.497512	NM_030952	ENSG00000163545	NUAK2	SNARK	NUAK family kinase 2	protein-coding
3934	UPN3934	chr1	205311026	205315485	chr1:205311026-205315485	3	2	1	0		0		3934	chr1	205311026	205315485	+	0		intron (NM_030952, intron 1 of 6)	intron (NM_030952, intron 1 of 6)	8536	NM_030952	81788	Hs.497512	NM_030952	ENSG00000163545	NUAK2	SNARK	NUAK family kinase 2	protein-coding
3935	UPN3935	chr1	205317168	205320152	chr1:205317168-205320152	1	1	1	0		0		3935	chr1	205317168	205320152	+	0		intron (NM_030952, intron 1 of 6)	intron (NM_030952, intron 1 of 6)	3131	NM_030952	81788	Hs.497512	NM_030952	ENSG00000163545	NUAK2	SNARK	NUAK family kinase 2	protein-coding
3936	UPN3936	chr1	205320734	205321925	chr1:205320734-205321925	1	1	1	0		0		3936	chr1	205320734	205321925	+	0		intron (NM_030952, intron 1 of 6)	CpG	462	NM_030952	81788	Hs.497512	NM_030952	ENSG00000163545	NUAK2	SNARK	NUAK family kinase 2	protein-coding
3938	UPN3938	chr1	205516356	205516657	chr1:205516356-205516657	1	1	1	0		0		3938	chr1	205516356	205516657	+	0		intron (NM_002596, intron 1 of 15)	intron (NM_002596, intron 1 of 15)	11950	NM_212502	5129	Hs.445402	NM_002596	ENSG00000117266	CDK18	PCTAIRE|PCTAIRE3|PCTK3	cyclin dependent kinase 18	protein-coding
3939	UPN3939	chr1	205543795	205544155	chr1:205543795-205544155	1	1	1	0		0		3939	chr1	205543795	205544155	+	0		Intergenic	Intergenic	-25009	NM_181644	148808	Hs.567714	NM_181644	ENSG00000174514	MFSD4A	MFSD4|UNQ3064	major facilitator superfamily domain containing 4A	protein-coding
3941	UPN3941	chr1	205598167	205600695	chr1:205598167-205600695	1	1	1	0		0		3941	chr1	205598167	205600695	+	0		intron (NM_181644, intron 9 of 9)	intron (NM_181644, intron 9 of 9)	-30126	NR_027086	284578	Hs.537020	NR_027086		LOC284578	-	uncharacterized LOC284578	ncRNA
3948	UPN3948	chr1	206001646	206004419	chr1:206001646-206004419	2	2	2	0		0		3948	chr1	206001646	206004419	+	0		intron (NM_001304839, intron 1 of 4)	intron (NM_001304839, intron 1 of 4)	434	NM_001164522	338382	Hs.534612	NM_177403	ENSG00000276600	RAB7B	RAB7	RAB7B, member RAS oncogene family	protein-coding
3953	UPN3953	chr1	206469867	206472298	chr1:206469867-206472298	1	1	1	0		0		3953	chr1	206469867	206472298	+	0		intron (NM_014002, intron 1 of 21)	intron (NM_014002, intron 1 of 21)	839	NM_001193321	9641	Hs.321045	NM_014002	ENSG00000263528	IKBKE	IKK-E|IKK-i|IKKE|IKKI	inhibitor of nuclear factor kappa B kinase subunit epsilon	protein-coding
3957	UPN3957	chr1	206507013	206507917	chr1:206507013-206507917	1	1	1	0		0		3957	chr1	206507013	206507917	+	0		promoter-TSS (NM_182664)	promoter-TSS (NM_182664)	-65	NM_182663	83593	Hs.497579	NM_031437	ENSG00000266094	RASSF5	Maxp1|NORE1|NORE1A|NORE1B|RAPL|RASSF3	Ras association domain family member 5	protein-coding
3958	UPN3958	chr1	206555500	206558116	chr1:206555500-206558116	1	1	1	0		0		3958	chr1	206555500	206558116	+	0		promoter-TSS (NM_182665)	promoter-TSS (NM_182665)	-356	NM_182665	83593	Hs.497579	NM_031437	ENSG00000266094	RASSF5	Maxp1|NORE1|NORE1A|NORE1B|RAPL|RASSF3	Ras association domain family member 5	protein-coding
3967	UPN3967	chr1	206573143	206583822	chr1:206573143-206583822	1	3	2	0		0		3967	chr1	206573143	206583822	+	0		intron (NM_182665, intron 1 of 4)	intron (NM_182665, intron 1 of 4)	21318	NM_182665	83593	Hs.497579	NM_031437	ENSG00000266094	RASSF5	Maxp1|NORE1|NORE1A|NORE1B|RAPL|RASSF3	Ras association domain family member 5	protein-coding
3971	UPN3971	chr1	206634418	206636309	chr1:206634418-206636309	1	2	1	0		0		3971	chr1	206634418	206636309	+	0		promoter-TSS (NM_003582)	promoter-TSS (NM_003582)	-173	NM_003582	8444	Hs.164267	NM_003582	ENSG00000143479	DYRK3	DYRK5|RED|REDK|hYAK3-2	dual specificity tyrosine phosphorylation regulated kinase 3	protein-coding
3973	UPN3973	chr1	206674186	206675598	chr1:206674186-206675598	1	1	1	0		0		3973	chr1	206674186	206675598	+	0		Intergenic	Intergenic	-10128	NM_004759	9261	Hs.643566	NM_004759	ENSG00000162889	MAPKAPK2	MAPKAP-K2|MK-2|MK2	mitogen-activated protein kinase-activated protein kinase 2	protein-coding
3976	UPN3976	chr1	206692171	206693927	chr1:206692171-206693927	1	1	1	0		0		3976	chr1	206692171	206693927	+	0		intron (NM_032960, intron 1 of 9)	intron (NM_032960, intron 1 of 9)	8029	NM_032960	9261	Hs.643566	NM_004759	ENSG00000162889	MAPKAPK2	MAPKAP-K2|MK-2|MK2	mitogen-activated protein kinase-activated protein kinase 2	protein-coding
3980	UPN3980	chr1	206705254	206708160	chr1:206705254-206708160	2	2	2	0		0		3980	chr1	206705254	206708160	+	0		intron (NM_032960, intron 1 of 9)	intron (NM_032960, intron 1 of 9)	21687	NM_032960	9261	Hs.643566	NM_004759	ENSG00000162889	MAPKAPK2	MAPKAP-K2|MK-2|MK2	mitogen-activated protein kinase-activated protein kinase 2	protein-coding
3981	UPN3981	chr1	206713159	206714939	chr1:206713159-206714939	1	1	1	0		0		3981	chr1	206713159	206714939	+	0		intron (NM_032960, intron 1 of 9)	L2c|LINE|L2	29029	NM_032960	9261	Hs.643566	NM_004759	ENSG00000162889	MAPKAPK2	MAPKAP-K2|MK-2|MK2	mitogen-activated protein kinase-activated protein kinase 2	protein-coding
3983	UPN3983	chr1	206723567	206724470	chr1:206723567-206724470	1	1	1	0		0		3983	chr1	206723567	206724470	+	0		intron (NM_032960, intron 1 of 9)	intron (NM_032960, intron 1 of 9)	38998	NM_032960	9261	Hs.643566	NM_004759	ENSG00000162889	MAPKAPK2	MAPKAP-K2|MK-2|MK2	mitogen-activated protein kinase-activated protein kinase 2	protein-coding
3988	UPN3988	chr1	206768749	206774641	chr1:206768749-206774641	2	3	2	0		0		3988	chr1	206768749	206774641	+	0		intron (NM_000572, intron 1 of 4)	intron (NM_000572, intron 1 of 4)	799	NM_000572	3586	Hs.193717	NM_000572	ENSG00000136634	IL10	CSIF|GVHDS|IL-10|IL10A|TGIF	interleukin 10	protein-coding
3990	UPN3990	chr1	206865158	206866029	chr1:206865158-206866029	1	1	1	0		0		3990	chr1	206865158	206866029	+	0		promoter-TSS (NM_018724)	promoter-TSS (NM_018724)	-216	NM_018724	50604	Hs.272373	NM_018724	ENSG00000162891	IL20	IL-20|IL10D|ZCYTO10	interleukin 20	protein-coding
3995	UPN3995	chr1	206921469	206925607	chr1:206921469-206925607	1	1	1	0		0		3995	chr1	206921469	206925607	+	0		Intergenic	Intergenic	-1505	NM_005449	9214	Hs.58831	NM_005449	ENSG00000162894	FCMR	FAIM3|TOSO	Fc fragment of IgM receptor	protein-coding
3997	UPN3997	chr1	207024223	207025876	chr1:207024223-207025876	2	1	1	0		0		3997	chr1	207024223	207025876	+	0		exon (NM_023938, exon 3 of 4)	exon (NM_023938, exon 3 of 4)	7707	NM_023938	79098	Hs.32417	NM_023938	ENSG00000182795	C1orf116	SARG	chromosome 1 open reading frame 116	protein-coding
3999	UPN3999	chr1	207053245	207054667	chr1:207053245-207054667	1	1	1	0		0		3999	chr1	207053245	207054667	+	0		promoter-TSS (NM_001276320)	promoter-TSS (NM_001276320)	681	NM_006212	5208	Hs.282702	NM_006212	ENSG00000123836	PFKFB2	PFK-2/FBPase-2	6-phosphofructo-2-kinase/fructose-2,6-biphosphatase 2	protein-coding
4004	UPN4004	chr1	207282512	207285229	chr1:207282512-207285229	2	2	1	0		0		4004	chr1	207282512	207285229	+	0		Intergenic	Intergenic	-37602	NM_001300903	1604	Hs.126517	NM_000574	ENSG00000196352	CD55	CHAPLE|CR|CROM|DAF|TC	CD55 molecule (Cromer blood group)	protein-coding
4005	UPN4005	chr1	207287829	207288378	chr1:207287829-207288378	1	1	1	0		0		4005	chr1	207287829	207288378	+	0		Intergenic	Intergenic	-33369	NM_001300903	1604	Hs.126517	NM_000574	ENSG00000196352	CD55	CHAPLE|CR|CROM|DAF|TC	CD55 molecule (Cromer blood group)	protein-coding
4006	UPN4006	chr1	207308895	207310248	chr1:207308895-207310248	1	1	1	0		0		4006	chr1	207308895	207310248	+	0		Intergenic	MIR|SINE|MIR	-11901	NM_001300903	1604	Hs.126517	NM_000574	ENSG00000196352	CD55	CHAPLE|CR|CROM|DAF|TC	CD55 molecule (Cromer blood group)	protein-coding
4010	UPN4010	chr1	207413918	207414609	chr1:207413918-207414609	1	1	1	0		0		4010	chr1	207413918	207414609	+	0		Intergenic	L1MB4|LINE|L1	-40037	NM_001877	1380	Hs.445757	NM_001877	ENSG00000117322	CR2	C3DR|CD21|CR|CVID7|SLEB9	complement C3d receptor 2	protein-coding
4014	UPN4014	chr1	207805790	207808772	chr1:207805790-207808772	1	3	1	0		0		4014	chr1	207805790	207808772	+	0		intron (NR_135299, intron 4 of 5)	intron (NR_135299, intron 4 of 5)	-4758	NR_029518	407025		NR_029518	ENSG00000284203	MIR29B2	MIRN29B2	microRNA 29b-2	ncRNA
4018	UPN4018	chr1	207822171	207828727	chr1:207822171-207828727	1	1	1	0		0		4018	chr1	207822171	207828727	+	0		Intergenic	Intergenic	-2746	NR_135298	100128537	Hs.445414	NR_135298		MIR29B2CHG	C1orf132	MIR29B2 and MIR29C host gene	ncRNA
4021	UPN4021	chr1	207845072	207845835	chr1:207845072-207845835	1	1	1	0		0		4021	chr1	207845072	207845835	+	0		Intergenic	Intergenic	-22750	NR_135298	100128537	Hs.445414	NR_135298		MIR29B2CHG	C1orf132	MIR29B2 and MIR29C host gene	ncRNA
4023	UPN4023	chr1	207847576	207853515	chr1:207847576-207853515	1	2	2	0		0		4023	chr1	207847576	207853515	+	0		Intergenic	Intergenic	-27842	NR_135298	100128537	Hs.445414	NR_135298		MIR29B2CHG	C1orf132	MIR29B2 and MIR29C host gene	ncRNA
4026	UPN4026	chr1	207863548	207868731	chr1:207863548-207868731	1	1	1	0		0		4026	chr1	207863548	207868731	+	0		Intergenic	Intergenic	-43436	NR_135298	100128537	Hs.445414	NR_135298		MIR29B2CHG	C1orf132	MIR29B2 and MIR29C host gene	ncRNA
4029	UPN4029	chr1	207885553	207886918	chr1:207885553-207886918	1	1	2	0		0		4029	chr1	207885553	207886918	+	0		TTS (NM_001773)	TTS (NM_001773)	25103	NM_001025109	947	Hs.374990	NM_001773	ENSG00000174059	CD34	-	CD34 molecule	protein-coding
4030	UPN4030	chr1	207886960	207892223	chr1:207886960-207892223	2	1	2	0		0		4030	chr1	207886960	207892223	+	0		exon (NM_001773, exon 5 of 8)	exon (NM_001773, exon 5 of 8)	21747	NM_001025109	947	Hs.374990	NM_001773	ENSG00000174059	CD34	-	CD34 molecule	protein-coding
4039	UPN4039	chr1	207961959	207964572	chr1:207961959-207964572	2	1	2	0		0		4039	chr1	207961959	207964572	+	0		Intergenic	Intergenic	-51927	NM_001773	947	Hs.374990	NM_001773	ENSG00000174059	CD34	-	CD34 molecule	protein-coding
4040	UPN4040	chr1	208028787	208031532	chr1:208028787-208031532	1	1	2	0		0		4040	chr1	208028787	208031532	+	0		intron (NM_025179, intron 29 of 31)	intron (NM_025179, intron 29 of 31)	-118821	NM_001773	947	Hs.374990	NM_001773	ENSG00000174059	CD34	-	CD34 molecule	protein-coding
4041	UPN4041	chr1	208047534	208048744	chr1:208047534-208048744	1	1	1	0		0		4041	chr1	208047534	208048744	+	0		intron (NM_025179, intron 17 of 31)	intron (NM_025179, intron 17 of 31)	-136801	NM_001773	947	Hs.374990	NM_001773	ENSG00000174059	CD34	-	CD34 molecule	protein-coding
4044	UPN4044	chr1	208202603	208205970	chr1:208202603-208205970	1	1	2	0		0		4044	chr1	208202603	208205970	+	0		intron (NM_025179, intron 3 of 31)	intron (NM_025179, intron 3 of 31)	40034	NM_025179	5362	Hs.497626	NM_025179	ENSG00000076356	PLXNA2	OCT|PLXN2	plexin A2	protein-coding
4046	UPN4046	chr1	208207275	208209104	chr1:208207275-208209104	1	2	1	0		0		4046	chr1	208207275	208209104	+	0		intron (NM_025179, intron 3 of 31)	intron (NM_025179, intron 3 of 31)	36131	NM_025179	5362	Hs.497626	NM_025179	ENSG00000076356	PLXNA2	OCT|PLXN2	plexin A2	protein-coding
4049	UPN4049	chr1	208218364	208220990	chr1:208218364-208220990	1	1	2	0		0		4049	chr1	208218364	208220990	+	0		intron (NM_025179, intron 1 of 31)	intron (NM_025179, intron 1 of 31)	24643	NM_025179	5362	Hs.497626	NM_025179	ENSG00000076356	PLXNA2	OCT|PLXN2	plexin A2	protein-coding
4054	UPN4054	chr1	209397156	209398644	chr1:209397156-209398644	1	1	1	0		0		4054	chr1	209397156	209398644	+	0		Intergenic	Intergenic	25845	NR_146491	101929476	Hs.568721	NR_146491		LINC01698	-	long intergenic non-protein coding RNA 1698	ncRNA
4057	UPN4057	chr1	209412099	209412820	chr1:209412099-209412820	1	1	1	0		0		4057	chr1	209412099	209412820	+	0		Intergenic	(TTCT)n|Simple_repeat|Simple_repeat	-16361	NR_145437	642587	Hs.510543	NR_145433	ENSG00000230937	MIR205HG	LINC00510|NPC-A-5	MIR205 host gene	ncRNA
4064	UPN4064	chr1	209675045	209676150	chr1:209675045-209676150	1	1	1	0		0		4064	chr1	209675045	209676150	+	0		promoter-TSS (NR_134511)	promoter-TSS (NR_134511)	272	NM_015714	50486	Hs.432132	NM_015714	ENSG00000123689	G0S2	-	G0/G1 switch 2	protein-coding
4067	UPN4067	chr1	209755883	209758072	chr1:209755883-209758072	1	1	1	0		0		4067	chr1	209755883	209758072	+	0		intron (NM_001320144, intron 1 of 16)	intron (NM_001320144, intron 1 of 16)	945	NM_025228	80342	Hs.147434	NM_025228	ENSG00000009790	TRAF3IP3	T3JAM	TRAF3 interacting protein 3	protein-coding
4071	UPN4071	chr1	209766907	209770667	chr1:209766907-209770667	1	1	1	0		0		4071	chr1	209766907	209770667	+	0		intron (NM_001287754, intron 1 of 6)	intron (NM_001287754, intron 1 of 6)	299	NM_001287754	80342	Hs.147434	NM_025228	ENSG00000009790	TRAF3IP3	T3JAM	TRAF3 interacting protein 3	protein-coding
4073	UPN4073	chr1	209839618	209840988	chr1:209839618-209840988	1	1	1	0		0		4073	chr1	209839618	209840988	+	0		intron (NM_014388, intron 7 of 11)	L2b|LINE|L2	12336	NM_014388	27042	Hs.194754	NM_014388	ENSG00000117597	UTP25	C1orf107|DEF|DIEXF|DJ434O14.5	UTP25, small subunit processor component	protein-coding
4078	UPN4078	chr1	210597590	210598335	chr1:210597590-210598335	1	1	1	0		0		4078	chr1	210597590	210598335	+	0		intron (NM_001122834, intron 10 of 11)	L1MA3|LINE|L1	268666	NM_001170580	55733	Hs.58650	NM_018194	ENSG00000054392	HHAT	MART2|SKI1|Skn	hedgehog acyltransferase	protein-coding
4083	UPN4083	chr1	211377291	211378973	chr1:211377291-211378973	1	1	1	0		0		4083	chr1	211377291	211378973	+	0		Intergenic	L2a|LINE|L2	-4623	NR_026761	84791	Hs.523932	NM_032705		LINC00467	C1orf97	long intergenic non-protein coding RNA 467	ncRNA
4101	UPN4101	chr1	212284411	212284943	chr1:212284411-212284943	1	1	1	0		0		4101	chr1	212284411	212284943	+	0		promoter-TSS (NM_006243)	promoter-TSS (NM_006243)	344	NR_125984	101929541	Hs.632493	NR_125982	ENSG00000226251	LOC101929541	-	uncharacterized LOC101929541	ncRNA
4103	UPN4103	chr1	212415460	212415931	chr1:212415460-212415931	1	1	1	0		0		4103	chr1	212415460	212415931	+	0		promoter-TSS (NM_001198862)	promoter-TSS (NM_001198862)	-770	NM_018252	55248	Hs.445386	NM_018252	ENSG00000065600	TMEM206	C1orf75	transmembrane protein 206	protein-coding
4109	UPN4109	chr1	212487989	212488532	chr1:212487989-212488532	1	1	1	0		0		4109	chr1	212487989	212488532	+	0		Intergenic	Intergenic	55373	NR_026598	29937	Hs.461787	NM_013349	ENSG00000117691	NENF	CIR2|SCIRP10|SPUF	neudesin neurotrophic factor	protein-coding
4112	UPN4112	chr1	212490543	212491256	chr1:212490543-212491256	1	1	1	0		0		4112	chr1	212490543	212491256	+	0		Intergenic	Intergenic	-54795	NR_125985	101929565		NR_125985	ENSG00000228067	LINC01740	-	long intergenic non-protein coding RNA 1740	ncRNA
4113	UPN4113	chr1	212558249	212560191	chr1:212558249-212560191	2	1	1	0		0		4113	chr1	212558249	212560191	+	0		Intergenic	Intergenic	-6114	NM_001030287	467	Hs.460	NM_001674	ENSG00000162772	ATF3	-	activating transcription factor 3	protein-coding
4117	UPN4117	chr1	212606527	212608630	chr1:212606527-212608630	1	1	1	0		0		4117	chr1	212606527	212608630	+	0		intron (NM_001030287, intron 1 of 3)	CpG	-1050	NM_001206484	467	Hs.460	NM_001674	ENSG00000162772	ATF3	-	activating transcription factor 3	protein-coding
4118	UPN4118	chr1	212635321	212639549	chr1:212635321-212639549	1	2	1	0		0		4118	chr1	212635321	212639549	+	0		Intergenic	Intergenic	12988	NM_153606	149647	Hs.129293	NM_153606	ENSG00000162771	FAM71A	GARI-L4	family with sequence similarity 71 member A	protein-coding
4119	UPN4119	chr1	212665386	212669406	chr1:212665386-212669406	1	1	1	0		0		4119	chr1	212665386	212669406	+	0		Intergenic	Intergenic	32589	NM_018664	55509	Hs.62919	NM_018664	ENSG00000123685	BATF3	JDP1|JUNDM1|SNFT	basic leucine zipper ATF-like transcription factor 3	protein-coding
4120	UPN4120	chr1	212670665	212671375	chr1:212670665-212671375	1	1	1	0		0		4120	chr1	212670665	212671375	+	0		Intergenic	Intergenic	28965	NM_018664	55509	Hs.62919	NM_018664	ENSG00000123685	BATF3	JDP1|JUNDM1|SNFT	basic leucine zipper ATF-like transcription factor 3	protein-coding
4130	UPN4130	chr1	212792701	212793193	chr1:212792701-212793193	1	1	1	0		0		4130	chr1	212792701	212793193	+	0		intron (NM_001042552, intron 1 of 9)	L2c|LINE|L2	1119	NM_001146171	128387	Hs.530538	NM_001042552	ENSG00000203705	TATDN3	-	TatD DNase domain containing 3	protein-coding
4132	UPN4132	chr1	213014601	213015121	chr1:213014601-213015121	1	1	1	0		0		4132	chr1	213014601	213015121	+	0		intron (NM_144567, intron 1 of 8)	MER113A|DNA|hAT-Charlie	648	NM_001300755	90806	Hs.157078	NM_144567	ENSG00000174606	ANGEL2	Ccr4d|KIAA0759L	angel homolog 2	protein-coding
4151	UPN4151	chr1	218459578	218461064	chr1:218459578-218461064	1	1	1	0		0		4151	chr1	218459578	218461064	+	0		intron (NR_031644, intron 2 of 6)	intron (NR_031644, intron 2 of 6)	17695	NR_125715	103611157	Hs.133379	NR_125715	ENSG00000281453	TGFB2-OT1	-	TGFB2 overlapping transcript 1	ncRNA
4152	UPN4152	chr1	218462552	218462826	chr1:218462552-218462826	1	1	1	0		0		4152	chr1	218462552	218462826	+	0		intron (NR_031644, intron 2 of 6)	intron (NR_031644, intron 2 of 6)	20063	NR_125715	103611157	Hs.133379	NR_125715	ENSG00000281453	TGFB2-OT1	-	TGFB2 overlapping transcript 1	ncRNA
4163	UPN4163	chr1	219459769	219460176	chr1:219459769-219460176	1	1	1	0		0		4163	chr1	219459769	219460176	+	0		intron (NR_135822, intron 2 of 3)	intron (NR_135822, intron 2 of 3)	97352	NR_135822	102723886	Hs.525963	NR_135822		LOC102723886	-	uncharacterized LOC102723886	ncRNA
4165	UPN4165	chr1	219461586	219462572	chr1:219461586-219462572	1	1	1	0		0		4165	chr1	219461586	219462572	+	0		intron (NR_135822, intron 2 of 3)	intron (NR_135822, intron 2 of 3)	95245	NR_135822	102723886	Hs.525963	NR_135822		LOC102723886	-	uncharacterized LOC102723886	ncRNA
4173	UPN4173	chr1	220877049	220880419	chr1:220877049-220880419	2	1	1	0		0		4173	chr1	220877049	220880419	+	0		promoter-TSS (NM_021958)	promoter-TSS (NM_021958)	-667	NM_021958	3142	Hs.74870	NM_021958	ENSG00000136630	HLX	HB24|HLX1	H2.0 like homeobox	protein-coding
4174	UPN4174	chr1	220880940	220882749	chr1:220880940-220882749	1	1	1	0		0		4174	chr1	220880940	220882749	+	0		intron (NM_021958, intron 2 of 3)	intron (NM_021958, intron 2 of 3)	-1704	NR_046901	100873924	Hs.645593	NR_046901	ENSG00000257551	HLX-AS1	-	HLX antisense RNA 1	ncRNA
4182	UPN4182	chr1	221097899	221100468	chr1:221097899-221100468	1	2	1	0		0		4182	chr1	221097899	221100468	+	0		Intergenic	MER57A1|LTR|ERV1	-219043	NR_046901	100873924	Hs.645593	NR_046901	ENSG00000257551	HLX-AS1	-	HLX antisense RNA 1	ncRNA
4192	UPN4192	chr1	221710630	221712473	chr1:221710630-221712473	1	1	1	0		0		4192	chr1	221710630	221712473	+	0		intron (NR_111940, intron 1 of 2)	intron (NR_111940, intron 1 of 2)	25349	NR_111939	11221	Hs.497822	NM_007207	ENSG00000143507	DUSP10	MKP-5|MKP5	dual specificity phosphatase 10	protein-coding
4210	UPN4210	chr1	223114527	223114993	chr1:223114527-223114993	1	1	1	0		0		4210	chr1	223114527	223114993	+	0		intron (NM_003268, intron 5 of 5)	intron (NM_003268, intron 5 of 5)	28522	NM_003268	7100	Hs.604542	NM_003268	ENSG00000187554	TLR5	MELIOS|SLE1|SLEB1|TIL3	toll like receptor 5	protein-coding
4214	UPN4214	chr1	223142026	223144500	chr1:223142026-223144500	1	1	2	0		0		4214	chr1	223142026	223144500	+	0		promoter-TSS (NM_003268)	promoter-TSS (NM_003268)	19	NM_003268	7100	Hs.604542	NM_003268	ENSG00000187554	TLR5	MELIOS|SLE1|SLEB1|TIL3	toll like receptor 5	protein-coding
4215	UPN4215	chr1	223174947	223175474	chr1:223174947-223175474	1	1	1	0		0		4215	chr1	223174947	223175474	+	0		Intergenic	MER77|LTR|ERVL	-31928	NM_003268	7100	Hs.604542	NM_003268	ENSG00000187554	TLR5	MELIOS|SLE1|SLEB1|TIL3	toll like receptor 5	protein-coding
4216	UPN4216	chr1	223176427	223180770	chr1:223176427-223180770	2	3	1	0		0		4216	chr1	223176427	223180770	+	0		Intergenic	Intergenic	-35316	NM_003268	7100	Hs.604542	NM_003268	ENSG00000187554	TLR5	MELIOS|SLE1|SLEB1|TIL3	toll like receptor 5	protein-coding
4218	UPN4218	chr1	223699578	223701388	chr1:223699578-223701388	1	1	2	0		0		4218	chr1	223699578	223701388	+	0		Intergenic	Intergenic	-1110	NM_001146068	824	Hs.350899	NM_001748	ENSG00000162909	CAPN2	CANP2|CANPL2|CANPml|mCANP	calpain 2	protein-coding
4219	UPN4219	chr1	223704752	223706963	chr1:223704752-223706963	2	1	1	0		0		4219	chr1	223704752	223706963	+	0		intron (NM_001146068, intron 1 of 20)	MIRc|SINE|MIR	4264	NM_001146068	824	Hs.350899	NM_001748	ENSG00000162909	CAPN2	CANP2|CANPL2|CANPml|mCANP	calpain 2	protein-coding
4220	UPN4220	chr1	223707500	223708206	chr1:223707500-223708206	1	1	1	0		0		4220	chr1	223707500	223708206	+	0		intron (NM_001146068, intron 1 of 20)	intron (NM_001146068, intron 1 of 20)	-4564	NM_001748	824	Hs.350899	NM_001748	ENSG00000162909	CAPN2	CANP2|CANPL2|CANPml|mCANP	calpain 2	protein-coding
4221	UPN4221	chr1	223711875	223712384	chr1:223711875-223712384	1	1	1	0		0		4221	chr1	223711875	223712384	+	0		promoter-TSS (NM_001748)	promoter-TSS (NM_001748)	-288	NM_001748	824	Hs.350899	NM_001748	ENSG00000162909	CAPN2	CANP2|CANPL2|CANPml|mCANP	calpain 2	protein-coding
4222	UPN4222	chr1	223713091	223718879	chr1:223713091-223718879	2	1	1	0		0		4222	chr1	223713091	223718879	+	0		intron (NM_001748, intron 1 of 20)	MIRb|SINE|MIR	3568	NM_001748	824	Hs.350899	NM_001748	ENSG00000162909	CAPN2	CANP2|CANPL2|CANPml|mCANP	calpain 2	protein-coding
4224	UPN4224	chr1	223725639	223728342	chr1:223725639-223728342	1	1	1	0		0		4224	chr1	223725639	223728342	+	0		intron (NM_001748, intron 2 of 20)	intron (NM_001748, intron 2 of 20)	14573	NM_001748	824	Hs.350899	NM_001748	ENSG00000162909	CAPN2	CANP2|CANPL2|CANPml|mCANP	calpain 2	protein-coding
4225	UPN4225	chr1	223730687	223732255	chr1:223730687-223732255	2	1	1	0		0		4225	chr1	223730687	223732255	+	0		intron (NM_001748, intron 2 of 20)	intron (NM_001748, intron 2 of 20)	19054	NM_001748	824	Hs.350899	NM_001748	ENSG00000162909	CAPN2	CANP2|CANPL2|CANPml|mCANP	calpain 2	protein-coding
4228	UPN4228	chr1	223748477	223749258	chr1:223748477-223749258	1	1	1	0		0		4228	chr1	223748477	223749258	+	0		intron (NM_001748, intron 5 of 20)	CpG	36450	NM_001748	824	Hs.350899	NM_001748	ENSG00000162909	CAPN2	CANP2|CANPL2|CANPml|mCANP	calpain 2	protein-coding
4229	UPN4229	chr1	223771010	223772235	chr1:223771010-223772235	1	1	1	0		0		4229	chr1	223771010	223772235	+	0		intron (NM_001748, intron 18 of 20)	intron (NM_001748, intron 18 of 20)	59205	NM_001748	824	Hs.350899	NM_001748	ENSG00000162909	CAPN2	CANP2|CANPL2|CANPml|mCANP	calpain 2	protein-coding
4230	UPN4230	chr1	223831701	223833947	chr1:223831701-223833947	1	1	1	0		0		4230	chr1	223831701	223833947	+	0		intron (NM_001031685, intron 1 of 17)	intron (NM_001031685, intron 1 of 17)	13148	NM_001031685	7159	Hs.523968	NM_005426	ENSG00000143514	TP53BP2	53BP2|ASPP2|BBP|P53BP2|PPP1R13A	tumor protein p53 binding protein 2	protein-coding
4233	UPN4233	chr1	223846260	223847282	chr1:223846260-223847282	1	1	1	0		0		4233	chr1	223846260	223847282	+	0		promoter-TSS (NM_005426)	promoter-TSS (NM_005426)	-799	NM_005426	7159	Hs.523968	NM_005426	ENSG00000143514	TP53BP2	53BP2|ASPP2|BBP|P53BP2|PPP1R13A	tumor protein p53 binding protein 2	protein-coding
4240	UPN4240	chr1	224245309	224246093	chr1:224245309-224246093	1	1	1	0		0		4240	chr1	224245309	224246093	+	0		intron (NM_001243147, intron 18 of 21)	AluSg|SINE|Alu	11440	NR_031574	100313769		NR_031574	ENSG00000221406	MIR320B2	MIR320B-2|MIRN320B2|mir-320b-2	microRNA 320b-2	ncRNA
4245	UPN4245	chr1	224430738	224432580	chr1:224430738-224432580	1	2	1	0		0		4245	chr1	224430738	224432580	+	0		intron (NM_001115113, intron 2 of 13)	intron (NM_001115113, intron 2 of 13)	2640	NM_001115113	80232	Hs.497873	NM_025160	ENSG00000162923	WDR26	CDW2|GID7|MIP2|SKDEAS	WD repeat domain 26	protein-coding
4246	UPN4246	chr1	224434885	224436205	chr1:224434885-224436205	1	1	1	0		0		4246	chr1	224434885	224436205	+	0		intron (NM_001322303, intron 1 of 5)	intron (NM_001322303, intron 1 of 5)	650	NR_136291	149111	Hs.731723	NM_152495	ENSG00000143786	CNIH3	CNIH-3	cornichon family AMPA receptor auxiliary protein 3	protein-coding
4247	UPN4247	chr1	224456791	224457616	chr1:224456791-224457616	1	1	1	0		0		4247	chr1	224456791	224457616	+	0		intron (NM_001322302, intron 2 of 6)	intron (NM_001322302, intron 2 of 6)	22308	NR_136291	149111	Hs.731723	NM_152495	ENSG00000143786	CNIH3	CNIH-3	cornichon family AMPA receptor auxiliary protein 3	protein-coding
4250	UPN4250	chr1	224497136	224499631	chr1:224497136-224499631	1	1	1	0		0		4250	chr1	224497136	224499631	+	0		intron (NM_001322302, intron 2 of 6)	intron (NM_001322302, intron 2 of 6)	63488	NR_136291	149111	Hs.731723	NM_152495	ENSG00000143786	CNIH3	CNIH-3	cornichon family AMPA receptor auxiliary protein 3	protein-coding
4252	UPN4252	chr1	224501997	224504276	chr1:224501997-224504276	2	1	1	0		0		4252	chr1	224501997	224504276	+	0		intron (NM_001322302, intron 2 of 6)	intron (NM_001322302, intron 2 of 6)	68241	NR_136291	149111	Hs.731723	NM_152495	ENSG00000143786	CNIH3	CNIH-3	cornichon family AMPA receptor auxiliary protein 3	protein-coding
4256	UPN4256	chr1	225424627	225427600	chr1:225424627-225427600	1	1	1	0		0		4256	chr1	225424627	225427600	+	0		intron (NM_194442, intron 1 of 13)	intron (NM_194442, intron 1 of 13)	2000	NM_002296	3930	Hs.435166	NM_002296	ENSG00000143815	LBR	DHCR14B|LMN2R|PHA|TDRD18	lamin B receptor	protein-coding
4258	UPN4258	chr1	225444004	225450217	chr1:225444004-225450217	1	2	2	0		0		4258	chr1	225444004	225450217	+	0		Intergenic	Intergenic	-18255	NM_194442	3930	Hs.435166	NM_002296	ENSG00000143815	LBR	DHCR14B|LMN2R|PHA|TDRD18	lamin B receptor	protein-coding
4259	UPN4259	chr1	225450642	225452200	chr1:225450642-225452200	1	2	1	0		0		4259	chr1	225450642	225452200	+	0		Intergenic	L2a|LINE|L2	-22566	NM_194442	3930	Hs.435166	NM_002296	ENSG00000143815	LBR	DHCR14B|LMN2R|PHA|TDRD18	lamin B receptor	protein-coding
4263	UPN4263	chr1	225466934	225469225	chr1:225466934-225469225	1	1	1	0		0		4263	chr1	225466934	225469225	+	0		Intergenic	Intergenic	-39224	NM_194442	3930	Hs.435166	NM_002296	ENSG00000143815	LBR	DHCR14B|LMN2R|PHA|TDRD18	lamin B receptor	protein-coding
4267	UPN4267	chr1	225654489	225657959	chr1:225654489-225657959	1	1	2	0		0		4267	chr1	225654489	225657959	+	0		Intergenic	Intergenic	-3081	NM_018212	55740	Hs.497893	NM_018212	ENSG00000154380	ENAH	ENA|MENA|NDPP1	ENAH, actin regulator	protein-coding
4275	UPN4275	chr1	225766515	225767865	chr1:225766515-225767865	1	1	2	0		0		4275	chr1	225766515	225767865	+	0		Intergenic	Intergenic	-10623	NM_001130440	6726	Hs.511425	NM_003133	ENSG00000143742	SRP9	ALURBP	signal recognition particle 9	protein-coding
4278	UPN4278	chr1	225810975	225818651	chr1:225810975-225818651	2	2	4	0		0		4278	chr1	225810975	225818651	+	0		intron (NM_001291163, intron 1 of 8)	intron (NM_001291163, intron 1 of 8)	4679	NM_001291163	2052	Hs.89649	NM_000120	ENSG00000143819	EPHX1	EPHX|EPOX|HYL1|MEH	epoxide hydrolase 1	protein-coding
4286	UPN4286	chr1	225999672	226003520	chr1:225999672-226003520	2	1	1	0		0		4286	chr1	225999672	226003520	+	0		Intergenic	Intergenic	-2231	NM_152608	163859	Hs.520192	NM_152608	ENSG00000143751	SDE2	C1orf55|dJ671D7.1	SDE2 telomere maintenance homolog	protein-coding
4289	UPN4289	chr1	226032436	226033074	chr1:226032436-226033074	1	1	1	0		0		4289	chr1	226032436	226033074	+	0		Intergenic	Intergenic	-29952	NM_002107	3020	Hs.533624	NM_002107	ENSG00000163041	H3F3A	H3.3A|H3F3	H3 histone family member 3A	protein-coding
4290	UPN4290	chr1	226034429	226036151	chr1:226034429-226036151	1	1	1	0		0		4290	chr1	226034429	226036151	+	0		Intergenic	AluJr|SINE|Alu	-27417	NM_002107	3020	Hs.533624	NM_002107	ENSG00000163041	H3F3A	H3.3A|H3F3	H3 histone family member 3A	protein-coding
4296	UPN4296	chr1	226082857	226084098	chr1:226082857-226084098	1	1	1	0		0		4296	chr1	226082857	226084098	+	0		promoter-TSS (NR_146920)	promoter-TSS (NR_146920)	-98	NR_146920	105373113	Hs.149726	NR_146920		LINC01703	-	long intergenic non-protein coding RNA 1703	ncRNA
4297	UPN4297	chr1	226108661	226109882	chr1:226108661-226109882	1	1	1	0		0		4297	chr1	226108661	226109882	+	0		Intergenic	L2a|LINE|L2	25696	NR_146920	105373113	Hs.149726	NR_146920		LINC01703	-	long intergenic non-protein coding RNA 1703	ncRNA
4298	UPN4298	chr1	226110376	226112197	chr1:226110376-226112197	1	1	1	0		0		4298	chr1	226110376	226112197	+	0		Intergenic	LTR82B|LTR|ERVL	27711	NR_146920	105373113	Hs.149726	NR_146920		LINC01703	-	long intergenic non-protein coding RNA 1703	ncRNA
4299	UPN4299	chr1	226122299	226123042	chr1:226122299-226123042	1	1	1	0		0		4299	chr1	226122299	226123042	+	0		Intergenic	CpG	-25333	NR_146443	107985353	Hs.735455	NR_146443	ENSG00000234478	ACBD3-AS1	-	ACBD3 antisense RNA 1	ncRNA
4308	UPN4308	chr1	226602058	226602813	chr1:226602058-226602813	1	1	1	0		0		4308	chr1	226602058	226602813	+	0		3' UTR (NM_001003665, exon 4 of 4)	3' UTR (NM_001003665, exon 4 of 4)	53635	NM_001003665	375057	Hs.116827	NM_001003665	ENSG00000203685	STUM	C1orf95	stum, mechanosensory transduction mediator homolog	protein-coding
4312	UPN4312	chr1	226642440	226643409	chr1:226642440-226643409	1	1	1	0		0		4312	chr1	226642440	226643409	+	0		intron (NM_002221, intron 4 of 7)	intron (NM_002221, intron 4 of 7)	32144	NR_103784	100506443	Hs.664293	NR_103784		ITPKB-IT1	-	ITPKB intronic transcript 1	ncRNA
4317	UPN4317	chr1	226650515	226667659	chr1:226650515-226667659	4	3	2	0		0		4317	chr1	226650515	226667659	+	0		intron (NR_103784, intron 1 of 1)	intron (NR_103784, intron 1 of 1)	15981	NR_103784	100506443	Hs.664293	NR_103784		ITPKB-IT1	-	ITPKB intronic transcript 1	ncRNA
4318	UPN4318	chr1	226672146	226682451	chr1:226672146-226682451	1	1	2	0		0		4318	chr1	226672146	226682451	+	0		intron (NM_002221, intron 2 of 7)	intron (NM_002221, intron 2 of 7)	-2230	NR_103784	100506443	Hs.664293	NR_103784		ITPKB-IT1	-	ITPKB intronic transcript 1	ncRNA
4319	UPN4319	chr1	226682872	226683300	chr1:226682872-226683300	1	1	1	0		0		4319	chr1	226682872	226683300	+	0		intron (NM_002221, intron 2 of 7)	intron (NM_002221, intron 2 of 7)	-8018	NR_103784	100506443	Hs.664293	NR_103784		ITPKB-IT1	-	ITPKB intronic transcript 1	ncRNA
4320	UPN4320	chr1	226684861	226689499	chr1:226684861-226689499	2	2	2	0		0		4320	chr1	226684861	226689499	+	0		intron (NM_002221, intron 2 of 7)	intron (NM_002221, intron 2 of 7)	-12112	NR_103784	100506443	Hs.664293	NR_103784		ITPKB-IT1	-	ITPKB intronic transcript 1	ncRNA
4321	UPN4321	chr1	226690170	226693399	chr1:226690170-226693399	1	1	2	0		0		4321	chr1	226690170	226693399	+	0		intron (NM_002221, intron 2 of 7)	intron (NM_002221, intron 2 of 7)	-16716	NR_103784	100506443	Hs.664293	NR_103784		ITPKB-IT1	-	ITPKB intronic transcript 1	ncRNA
4322	UPN4322	chr1	226696763	226699477	chr1:226696763-226699477	3	1	2	0		0		4322	chr1	226696763	226699477	+	0		intron (NM_002221, intron 2 of 7)	intron (NM_002221, intron 2 of 7)	-23052	NR_103784	100506443	Hs.664293	NR_103784		ITPKB-IT1	-	ITPKB intronic transcript 1	ncRNA
4323	UPN4323	chr1	226701676	226705300	chr1:226701676-226705300	2	1	2	0		0		4323	chr1	226701676	226705300	+	0		intron (NM_002221, intron 2 of 7)	CpG	-28420	NR_103784	100506443	Hs.664293	NR_103784		ITPKB-IT1	-	ITPKB intronic transcript 1	ncRNA
4324	UPN4324	chr1	226708347	226710538	chr1:226708347-226710538	1	1	1	0		0		4324	chr1	226708347	226710538	+	0		intron (NM_002221, intron 2 of 7)	intron (NM_002221, intron 2 of 7)	29733	NM_002221	3707	Hs.528087	NM_002221	ENSG00000143772	ITPKB	IP3-3KB|IP3K|IP3K-B|IP3KB|PIG37	inositol-trisphosphate 3-kinase B	protein-coding
4327	UPN4327	chr1	226712180	226712961	chr1:226712180-226712961	1	1	1	0		0		4327	chr1	226712180	226712961	+	0		intron (NM_002221, intron 2 of 7)	intron (NM_002221, intron 2 of 7)	26605	NM_002221	3707	Hs.528087	NM_002221	ENSG00000143772	ITPKB	IP3-3KB|IP3K|IP3K-B|IP3KB|PIG37	inositol-trisphosphate 3-kinase B	protein-coding
4328	UPN4328	chr1	226716991	226717919	chr1:226716991-226717919	1	1	1	0		0		4328	chr1	226716991	226717919	+	0		intron (NM_002221, intron 2 of 7)	intron (NM_002221, intron 2 of 7)	21720	NM_002221	3707	Hs.528087	NM_002221	ENSG00000143772	ITPKB	IP3-3KB|IP3K|IP3K-B|IP3KB|PIG37	inositol-trisphosphate 3-kinase B	protein-coding
4329	UPN4329	chr1	226722881	226723588	chr1:226722881-226723588	1	1	1	0		0		4329	chr1	226722881	226723588	+	0		intron (NM_002221, intron 2 of 7)	intron (NM_002221, intron 2 of 7)	15941	NM_002221	3707	Hs.528087	NM_002221	ENSG00000143772	ITPKB	IP3-3KB|IP3K|IP3K-B|IP3KB|PIG37	inositol-trisphosphate 3-kinase B	protein-coding
4330	UPN4330	chr1	226723911	226724534	chr1:226723911-226724534	1	1	1	0		0		4330	chr1	226723911	226724534	+	0		intron (NM_002221, intron 2 of 7)	MIRb|SINE|MIR	14953	NM_002221	3707	Hs.528087	NM_002221	ENSG00000143772	ITPKB	IP3-3KB|IP3K|IP3K-B|IP3KB|PIG37	inositol-trisphosphate 3-kinase B	protein-coding
4340	UPN4340	chr1	226798721	226800344	chr1:226798721-226800344	1	1	2	0		0		4340	chr1	226798721	226800344	+	0		Intergenic	Intergenic	-60357	NM_002221	3707	Hs.528087	NM_002221	ENSG00000143772	ITPKB	IP3-3KB|IP3K|IP3K-B|IP3KB|PIG37	inositol-trisphosphate 3-kinase B	protein-coding
4341	UPN4341	chr1	226814281	226815570	chr1:226814281-226815570	1	1	1	0		0		4341	chr1	226814281	226815570	+	0		Intergenic	Intergenic	-55647	NM_012486	5664	Hs.25363	NM_000447	ENSG00000143801	PSEN2	AD3L|AD4|CMD1V|PS2|STM2	presenilin 2	protein-coding
4344	UPN4344	chr1	226821491	226822459	chr1:226821491-226822459	1	1	1	0		0		4344	chr1	226821491	226822459	+	0		Intergenic	Intergenic	-48597	NM_012486	5664	Hs.25363	NM_000447	ENSG00000143801	PSEN2	AD3L|AD4|CMD1V|PS2|STM2	presenilin 2	protein-coding
4345	UPN4345	chr1	226827070	226828437	chr1:226827070-226828437	1	1	1	0		0		4345	chr1	226827070	226828437	+	0		Intergenic	Intergenic	-42819	NM_012486	5664	Hs.25363	NM_000447	ENSG00000143801	PSEN2	AD3L|AD4|CMD1V|PS2|STM2	presenilin 2	protein-coding
4348	UPN4348	chr1	226938176	226939118	chr1:226938176-226939118	1	1	1	0		0		4348	chr1	226938176	226939118	+	0		Intergenic	Intergenic	-1590	NM_020247	56997	Hs.118241	NM_020247	ENSG00000163050	COQ8A	ADCK3|ARCA2|CABC1|COQ10D4|COQ8|SCAR9	coenzyme Q8A	protein-coding
4349	UPN4349	chr1	226973479	226975379	chr1:226973479-226975379	1	1	1	0		0		4349	chr1	226973479	226975379	+	0		intron (NM_020247, intron 4 of 14)	intron (NM_020247, intron 4 of 14)	34192	NM_020247	56997	Hs.118241	NM_020247	ENSG00000163050	COQ8A	ADCK3|ARCA2|CABC1|COQ10D4|COQ8|SCAR9	coenzyme Q8A	protein-coding
4355	UPN4355	chr1	227747055	227748828	chr1:227747055-227748828	1	1	1	0		0		4355	chr1	227747055	227748828	+	0		non-coding (NR_136655, exon 2 of 6)	non-coding (NR_136655, exon 2 of 6)	12246	NM_001323934	116841	Hs.325081	NM_053052	ENSG00000143740	SNAP47	C1orf142|ESFI5812|HEL-S-290|HEL170|SNAP-47|SVAP1	synaptosome associated protein 47	protein-coding
4357	UPN4357	chr1	227759796	227760592	chr1:227759796-227760592	1	1	1	0		0		4357	chr1	227759796	227760592	+	0		intron (NM_001323932, intron 4 of 5)	intron (NM_001323932, intron 4 of 5)	24499	NM_001323934	116841	Hs.325081	NM_053052	ENSG00000143740	SNAP47	C1orf142|ESFI5812|HEL-S-290|HEL170|SNAP-47|SVAP1	synaptosome associated protein 47	protein-coding
4361	UPN4361	chr1	227787653	227788097	chr1:227787653-227788097	1	1	1	0		0		4361	chr1	227787653	227788097	+	0		Intergenic	CpG	-27842	NM_183062	339501	Hs.97604	NM_183062	ENSG00000185888	PRSS38	MPN2	serine protease 38	protein-coding
4363	UPN4363	chr1	227885678	227888351	chr1:227885678-227888351	1	1	1	0		0		4363	chr1	227885678	227888351	+	0		Intergenic	Intergenic	54669	NR_049806	100847072		NR_049806	ENSG00000264483	MIR5008	-	microRNA 5008	ncRNA
4374	UPN4374	chr1	228140364	228143492	chr1:228140364-228143492	1	1	1	0		0		4374	chr1	228140364	228143492	+	0		intron (NM_000858, intron 2 of 8)	intron (NM_000858, intron 2 of 8)	1700	NM_001242840	2987	Hs.376933	NM_000858	ENSG00000143774	GUK1	GMK	guanylate kinase 1	protein-coding
4375	UPN4375	chr1	228146692	228151726	chr1:228146692-228151726	1	1	1	0		0		4375	chr1	228146692	228151726	+	0		promoter-TSS (NM_020435)	promoter-TSS (NM_020435)	-505	NM_020435	57165	Hs.100072	NM_020435	ENSG00000198835	GJC2	CX46.6|Cx47|GJA12|HLD2|LMPH1C|PMLDAR|SPG44	gap junction protein gamma 2	protein-coding
4379	UPN4379	chr1	228161418	228165506	chr1:228161418-228165506	1	1	1	0		0		4379	chr1	228161418	228165506	+	0		TTS (NR_103540)	TTS (NR_103540)	1386	NR_103539	574432	Hs.568467	NR_103539	ENSG00000203684	IBA57-DT	C1orf148|IBA57-AS1	IBA57 divergent transcript	ncRNA
4380	UPN4380	chr1	228166285	228167109	chr1:228166285-228167109	1	1	1	0		0		4380	chr1	228166285	228167109	+	0		intron (NM_001010867, intron 1 of 2)	intron (NM_001010867, intron 1 of 2)	889	NM_001010867	200205	Hs.237017	NM_001010867	ENSG00000181873	IBA57	C1orf69|MMDS3|SPG74	IBA57, iron-sulfur cluster assembly	protein-coding
4381	UPN4381	chr1	228178671	228179200	chr1:228178671-228179200	1	1	1	0		0		4381	chr1	228178671	228179200	+	0		3' UTR (NM_001010867, exon 3 of 3)	3' UTR (NM_001010867, exon 3 of 3)	4385	NM_001310327	200205	Hs.237017	NM_001010867	ENSG00000181873	IBA57	C1orf69|MMDS3|SPG74	IBA57, iron-sulfur cluster assembly	protein-coding
4388	UPN4388	chr1	228487848	228489185	chr1:228487848-228489185	1	1	1	0		0		4388	chr1	228487848	228489185	+	0		intron (NM_001010858, intron 1 of 3)	intron (NM_001010858, intron 1 of 3)	1149	NM_001010858	149603	Hs.356377	NM_001010858	ENSG00000168159	RNF187	RACO-1|RACO1	ring finger protein 187	protein-coding
4400	UPN4400	chr1	228899606	228900698	chr1:228899606-228900698	1	1	1	0		0		4400	chr1	228899606	228900698	+	0		Intergenic	Intergenic	165075	NM_021205	58480	Hs.647774	NM_021205	ENSG00000116574	RHOU	ARHU|CDC42L1|G28K|WRCH1|hG28K	ras homolog family member U	protein-coding
4403	UPN4403	chr1	228937697	228939660	chr1:228937697-228939660	1	2	1	0		0		4403	chr1	228937697	228939660	+	0		Intergenic	Intergenic	203601	NM_021205	58480	Hs.647774	NM_021205	ENSG00000116574	RHOU	ARHU|CDC42L1|G28K|WRCH1|hG28K	ras homolog family member U	protein-coding
4409	UPN4409	chr1	228989275	228991893	chr1:228989275-228991893	1	1	1	0		1	rs114257119	4409	chr1	228989275	228991893	+	0		Intergenic	Intergenic	184217	NR_039659	100616234		NR_039659	ENSG00000283468	MIR4454	-	microRNA 4454	ncRNA
4412	UPN4412	chr1	229027177	229029667	chr1:229027177-229029667	2	1	1	0		0		4412	chr1	229027177	229029667	+	0		Intergenic	Intergenic	146379	NR_039659	100616234		NR_039659	ENSG00000283468	MIR4454	-	microRNA 4454	ncRNA
4422	UPN4422	chr1	229158563	229160433	chr1:229158563-229160433	1	1	1	0		0		4422	chr1	229158563	229160433	+	0		Intergenic	Intergenic	15303	NR_039659	100616234		NR_039659	ENSG00000283468	MIR4454	-	microRNA 4454	ncRNA
4424	UPN4424	chr1	229199341	229200482	chr1:229199341-229200482	1	1	1	0		0		4424	chr1	229199341	229200482	+	0		Intergenic	Intergenic	-25110	NR_039659	100616234		NR_039659	ENSG00000283468	MIR4454	-	microRNA 4454	ncRNA
4427	UPN4427	chr1	229229077	229231513	chr1:229229077-229231513	1	1	1	0		0		4427	chr1	229229077	229231513	+	0		Intergenic	Intergenic	-40767	NM_004578	5867	Hs.296169	NM_004578	ENSG00000168118	RAB4A	HRES-1|HRES-1/RAB4|HRES1|RAB4	RAB4A, member RAS oncogene family	protein-coding
4430	UPN4430	chr1	229508417	229509191	chr1:229508417-229509191	1	1	1	0		0		4430	chr1	229508417	229509191	+	0		promoter-TSS (NM_018230)	promoter-TSS (NM_018230)	374	NR_110630	101927478	Hs.229275	NR_110630		LOC101927478	-	uncharacterized LOC101927478	ncRNA
4434	UPN4434	chr1	229597150	229598274	chr1:229597150-229598274	1	1	1	0		0		4434	chr1	229597150	229598274	+	0		intron (NM_014409, intron 4 of 4)	Charlie7a|DNA|hAT-Charlie	28335	NM_001025247	27097	Hs.270621	NM_014409	ENSG00000135801	TAF5L	PAF65B	TATA-box binding protein associated factor 5 like	protein-coding
4435	UPN4435	chr1	230083943	230086491	chr1:230083943-230086491	1	2	2	0		0		4435	chr1	230083943	230086491	+	0		intron (NM_004481, intron 1 of 15)	LTR32|LTR|ERVL	18022	NM_004481	2590	Hs.743964	NM_004481	ENSG00000143641	GALNT2	GalNAc-T2	polypeptide N-acetylgalactosaminyltransferase 2	protein-coding
4443	UPN4443	chr1	230191514	230192334	chr1:230191514-230192334	1	1	1	0		0		4443	chr1	230191514	230192334	+	0		intron (NM_004481, intron 2 of 15)	intron (NM_004481, intron 2 of 15)	124729	NM_004481	2590	Hs.743964	NM_004481	ENSG00000143641	GALNT2	GalNAc-T2	polypeptide N-acetylgalactosaminyltransferase 2	protein-coding
4451	UPN4451	chr1	230849903	230851507	chr1:230849903-230851507	1	1	1	0		0		4451	chr1	230849903	230851507	+	0		intron (NM_032800, intron 2 of 3)	intron (NM_032800, intron 2 of 3)	5331	NM_001136495	84886	Hs.520494	NM_032800	ENSG00000119280	C1orf198	-	chromosome 1 open reading frame 198	protein-coding
4454	UPN4454	chr1	230868773	230869602	chr1:230868773-230869602	1	1	1	0		0		4454	chr1	230868773	230869602	+	0		promoter-TSS (NM_032800)	promoter-TSS (NM_032800)	402	NM_001136494	84886	Hs.520494	NM_032800	ENSG00000119280	C1orf198	-	chromosome 1 open reading frame 198	protein-coding
4456	UPN4456	chr1	230976281	230978377	chr1:230976281-230978377	1	1	2	0		0		4456	chr1	230976281	230978377	+	0		intron (NM_024525, intron 1 of 22)	MIRc|SINE|MIR	1543	NM_024525	79573	Hs.424788	NM_024525	ENSG00000143643	TTC13	-	tetratricopeptide repeat domain 13	protein-coding
4458	UPN4458	chr1	231039071	231039900	chr1:231039071-231039900	1	1	1	0		0		4458	chr1	231039071	231039900	+	0		intron (NM_198552, intron 1 of 1)	CpG	764	NM_198552	375061	Hs.38516	NM_198552	ENSG00000182118	FAM89A	C1orf153	family with sequence similarity 89 member A	protein-coding
4463	UPN4463	chr1	231394826	231395910	chr1:231394826-231395910	1	1	1	0		0		4463	chr1	231394826	231395910	+	0		intron (NM_022051, intron 1 of 4)	MER119|DNA|hAT-Charlie	29676	NM_022051	54583	Hs.444450	NM_022051	ENSG00000135766	EGLN1	C1orf12|ECYT3|HALAH|HIF-PH2|HIFPH2|HPH-2|HPH2|PHD2|SM20|ZMYND6	egl-9 family hypoxia inducible factor 1	protein-coding
4470	UPN4470	chr1	231626934	231628058	chr1:231626934-231628058	1	1	1	0		0		4470	chr1	231626934	231628058	+	0		intron (NM_001164556, intron 1 of 4)	intron (NM_001164556, intron 1 of 4)	681	NM_001164539	27185	Hs.13318	NM_018662	ENSG00000162946	DISC1	C1orf136|SCZD9	DISC1 scaffold protein	protein-coding
4479	UPN4479	chr1	232590954	232591969	chr1:232590954-232591969	1	1	1	0		0		4479	chr1	232590954	232591969	+	0		Intergenic	Intergenic	-75853	NM_020808	57568	Hs.745009	NM_020808	ENSG00000116991	SIPA1L2	SPAL2	signal induced proliferation associated 1 like 2	protein-coding
4493	UPN4493	chr1	233112327	233115104	chr1:233112327-233115104	1	1	1	0		0		4493	chr1	233112327	233115104	+	0		intron (NM_014801, intron 21 of 33)	intron (NM_014801, intron 21 of 33)	162873	NR_138027	84284	Hs.642715	NM_032324	ENSG00000135778	NTPCR	C1orf57|HCR-NTPase	nucleoside-triphosphatase, cancer-related	protein-coding
4498	UPN4498	chr1	234498818	234501161	chr1:234498818-234501161	2	1	1	0		0		4498	chr1	234498818	234501161	+	0		Intergenic	Intergenic	-20886	NM_005646	6894	Hs.498115	NM_005646	ENSG00000059588	TARBP1	TRM3|TRMT3|TRP-185|TRP185	TAR (HIV-1) RNA binding protein 1	protein-coding
4499	UPN4499	chr1	234515261	234516102	chr1:234515261-234516102	1	1	1	0		0		4499	chr1	234515261	234516102	+	0		Intergenic	Intergenic	16098	NR_038426	100506795	Hs.448989	NR_038426	ENSG00000231768	LINC01354	-	long intergenic non-protein coding RNA 1354	ncRNA
4502	UPN4502	chr1	234521502	234523758	chr1:234521502-234523758	1	2	1	0		0		4502	chr1	234521502	234523758	+	0		Intergenic	Intergenic	9149	NR_038426	100506795	Hs.448989	NR_038426	ENSG00000231768	LINC01354	-	long intergenic non-protein coding RNA 1354	ncRNA
4504	UPN4504	chr1	234525032	234525740	chr1:234525032-234525740	1	1	1	0		0		4504	chr1	234525032	234525740	+	0		Intergenic	Intergenic	6393	NR_038426	100506795	Hs.448989	NR_038426	ENSG00000231768	LINC01354	-	long intergenic non-protein coding RNA 1354	ncRNA
4505	UPN4505	chr1	234528322	234537791	chr1:234528322-234537791	1	1	2	0		0		4505	chr1	234528322	234537791	+	0		Intergenic	Intergenic	-1277	NR_038426	100506795	Hs.448989	NR_038426	ENSG00000231768	LINC01354	-	long intergenic non-protein coding RNA 1354	ncRNA
4506	UPN4506	chr1	234543330	234546194	chr1:234543330-234546194	1	1	1	0		0		4506	chr1	234543330	234546194	+	0		Intergenic	Intergenic	-12983	NR_038426	100506795	Hs.448989	NR_038426	ENSG00000231768	LINC01354	-	long intergenic non-protein coding RNA 1354	ncRNA
4509	UPN4509	chr1	234598664	234599548	chr1:234598664-234599548	1	1	1	0		0		4509	chr1	234598664	234599548	+	0		Intergenic	Intergenic	10419	NM_182972	359948	Hs.350268	NM_182972	ENSG00000168264	IRF2BP2	CVID14	interferon regulatory factor 2 binding protein 2	protein-coding
4510	UPN4510	chr1	234599864	234605146	chr1:234599864-234605146	1	2	1	0		0		4510	chr1	234599864	234605146	+	0		Intergenic	Intergenic	7020	NM_182972	359948	Hs.350268	NM_182972	ENSG00000168264	IRF2BP2	CVID14	interferon regulatory factor 2 binding protein 2	protein-coding
4511	UPN4511	chr1	234607090	234607787	chr1:234607090-234607787	1	1	1	0		0		4511	chr1	234607090	234607787	+	0		exon (NM_001077397, exon 2 of 2)	exon (NM_001077397, exon 2 of 2)	2087	NM_182972	359948	Hs.350268	NM_182972	ENSG00000168264	IRF2BP2	CVID14	interferon regulatory factor 2 binding protein 2	protein-coding
4512	UPN4512	chr1	234610976	234614490	chr1:234610976-234614490	1	1	1	0		0		4512	chr1	234610976	234614490	+	0		Intergenic	Intergenic	-3208	NM_001077397	359948	Hs.350268	NM_182972	ENSG00000168264	IRF2BP2	CVID14	interferon regulatory factor 2 binding protein 2	protein-coding
4517	UPN4517	chr1	234715940	234718209	chr1:234715940-234718209	2	1	1	0		0		4517	chr1	234715940	234718209	+	0		Intergenic	Intergenic	-6968	NR_038856	100506810	Hs.586634	NR_038856	ENSG00000227630	LINC01132	-	long intergenic non-protein coding RNA 1132	ncRNA
4518	UPN4518	chr1	234718558	234723954	chr1:234718558-234723954	1	1	3	0		0		4518	chr1	234718558	234723954	+	0		Intergenic	Intergenic	-2786	NR_038856	100506810	Hs.586634	NR_038856	ENSG00000227630	LINC01132	-	long intergenic non-protein coding RNA 1132	ncRNA
4519	UPN4519	chr1	234724389	234729318	chr1:234724389-234729318	1	1	1	0		0		4519	chr1	234724389	234729318	+	0		intron (NR_038856, intron 2 of 2)	intron (NR_038856, intron 2 of 2)	2811	NR_038856	100506810	Hs.586634	NR_038856	ENSG00000227630	LINC01132	-	long intergenic non-protein coding RNA 1132	ncRNA
4522	UPN4522	chr1	234771520	234772997	chr1:234771520-234772997	1	1	1	0		0		4522	chr1	234771520	234772997	+	0		Intergenic	Intergenic	-12202	NR_148962	100130249	Hs.617350	NR_148962	ENSG00000279261	PP2672	-	uncharacterized LOC100130249	ncRNA
4525	UPN4525	chr1	234842386	234843618	chr1:234842386-234843618	1	1	1	0		0		4525	chr1	234842386	234843618	+	0		Intergenic	Intergenic	-82946	NR_148962	100130249	Hs.617350	NR_148962	ENSG00000279261	PP2672	-	uncharacterized LOC100130249	ncRNA
4526	UPN4526	chr1	234844198	234845292	chr1:234844198-234845292	1	1	1	0		0		4526	chr1	234844198	234845292	+	0		Intergenic	Intergenic	-84689	NR_148962	100130249	Hs.617350	NR_148962	ENSG00000279261	PP2672	-	uncharacterized LOC100130249	ncRNA
4530	UPN4530	chr1	234862716	234864404	chr1:234862716-234864404	1	1	1	0		0		4530	chr1	234862716	234864404	+	0		Intergenic	Intergenic	100439	NR_125945	101927851	Hs.520684	NR_125945	ENSG00000238005	LOC101927851	-	uncharacterized LOC101927851	ncRNA
4537	UPN4537	chr1	234915911	234919772	chr1:234915911-234919772	1	1	1	0		0		4537	chr1	234915911	234919772	+	0		Intergenic	MLT1A|LTR|ERVL-MaLR	46158	NR_125945	101927851	Hs.520684	NR_125945	ENSG00000238005	LOC101927851	-	uncharacterized LOC101927851	ncRNA
4538	UPN4538	chr1	234920140	234922130	chr1:234920140-234922130	1	1	1	0		0		4538	chr1	234920140	234922130	+	0		Intergenic	Intergenic	42864	NR_125945	101927851	Hs.520684	NR_125945	ENSG00000238005	LOC101927851	-	uncharacterized LOC101927851	ncRNA
4539	UPN4539	chr1	234924793	234927798	chr1:234924793-234927798	1	2	1	0		0		4539	chr1	234924793	234927798	+	0		Intergenic	Intergenic	37704	NR_125945	101927851	Hs.520684	NR_125945	ENSG00000238005	LOC101927851	-	uncharacterized LOC101927851	ncRNA
4543	UPN4543	chr1	234954057	234965706	chr1:234954057-234965706	2	5	2	0		0		4543	chr1	234954057	234965706	+	0		non-coding (NR_125945, exon 2 of 4)	non-coding (NR_125945, exon 2 of 4)	4118	NR_125945	101927851	Hs.520684	NR_125945	ENSG00000238005	LOC101927851	-	uncharacterized LOC101927851	ncRNA
4544	UPN4544	chr1	234968434	234982864	chr1:234968434-234982864	2	2	1	0		0		4544	chr1	234968434	234982864	+	0		Intergenic	Intergenic	-11650	NR_125945	101927851	Hs.520684	NR_125945	ENSG00000238005	LOC101927851	-	uncharacterized LOC101927851	ncRNA
4545	UPN4545	chr1	234983183	234988749	chr1:234983183-234988749	1	1	2	0		0		4545	chr1	234983183	234988749	+	0		Intergenic	AluJb|SINE|Alu	-21967	NR_125945	101927851	Hs.520684	NR_125945	ENSG00000238005	LOC101927851	-	uncharacterized LOC101927851	ncRNA
4546	UPN4546	chr1	234988754	234990143	chr1:234988754-234990143	1	1	1	0		0		4546	chr1	234988754	234990143	+	0		Intergenic	Intergenic	-25449	NR_125945	101927851	Hs.520684	NR_125945	ENSG00000238005	LOC101927851	-	uncharacterized LOC101927851	ncRNA
4547	UPN4547	chr1	234996486	235000112	chr1:234996486-235000112	1	1	1	0		0		4547	chr1	234996486	235000112	+	0		Intergenic	Intergenic	-34300	NR_125945	101927851	Hs.520684	NR_125945	ENSG00000238005	LOC101927851	-	uncharacterized LOC101927851	ncRNA
4548	UPN4548	chr1	235010919	235013684	chr1:235010919-235013684	1	1	1	0		0		4548	chr1	235010919	235013684	+	0		Intergenic	Intergenic	-48302	NR_125945	101927851	Hs.520684	NR_125945	ENSG00000238005	LOC101927851	-	uncharacterized LOC101927851	ncRNA
4551	UPN4551	chr1	235046821	235049998	chr1:235046821-235049998	1	1	2	0		0		4551	chr1	235046821	235049998	+	0		Intergenic	Intergenic	21409	NR_027454	731656	Hs.702477	NR_027454		LINC01348	-	long intergenic non-protein coding RNA 1348	ncRNA
4552	UPN4552	chr1	235050842	235051313	chr1:235050842-235051313	1	1	1	0		0		4552	chr1	235050842	235051313	+	0		Intergenic	Intergenic	18741	NR_027454	731656	Hs.702477	NR_027454		LINC01348	-	long intergenic non-protein coding RNA 1348	ncRNA
4554	UPN4554	chr1	235067326	235068838	chr1:235067326-235068838	1	1	1	0		0		4554	chr1	235067326	235068838	+	0		intron (NR_027454, intron 2 of 3)	intron (NR_027454, intron 2 of 3)	1736	NR_027454	731656	Hs.702477	NR_027454		LINC01348	-	long intergenic non-protein coding RNA 1348	ncRNA
4555	UPN4555	chr1	235069430	235070400	chr1:235069430-235070400	1	1	1	0		0		4555	chr1	235069430	235070400	+	0		promoter-TSS (NR_027454)	promoter-TSS (NR_027454)	-97	NR_027454	731656	Hs.702477	NR_027454		LINC01348	-	long intergenic non-protein coding RNA 1348	ncRNA
4557	UPN4557	chr1	235073153	235080461	chr1:235073153-235080461	1	2	1	0		0		4557	chr1	235073153	235080461	+	0		Intergenic	Intergenic	-6989	NR_027454	731656	Hs.702477	NR_027454		LINC01348	-	long intergenic non-protein coding RNA 1348	ncRNA
4559	UPN4559	chr1	235082330	235084368	chr1:235082330-235084368	1	1	1	0		0		4559	chr1	235082330	235084368	+	0		Intergenic	Intergenic	-13531	NR_027454	731656	Hs.702477	NR_027454		LINC01348	-	long intergenic non-protein coding RNA 1348	ncRNA
4560	UPN4560	chr1	235161714	235162148	chr1:235161714-235162148	1	1	1	0		0		4560	chr1	235161714	235162148	+	0		promoter-TSS (NR_144492)	promoter-TSS (NR_144492)	-315	NR_144492	23029	Hs.535224	NM_015014	ENSG00000188739	RBM34	-	RNA binding motif protein 34	protein-coding
4565	UPN4565	chr1	235864534	235865378	chr1:235864534-235865378	1	1	1	0		0		4565	chr1	235864534	235865378	+	0		intron (NM_001301365, intron 1 of 52)	L2a|LINE|L2	1971	NM_000081	1130	Hs.532411	NM_000081	ENSG00000143669	LYST	CHS|CHS1	lysosomal trafficking regulator	protein-coding
4573	UPN4573	chr1	235917003	235918809	chr1:235917003-235918809	1	1	1	0		0		4573	chr1	235917003	235918809	+	0		Intergenic	Intergenic	-34198	NR_102436	1130	Hs.532411	NM_000081	ENSG00000143669	LYST	CHS|CHS1	lysosomal trafficking regulator	protein-coding
4576	UPN4576	chr1	235938182	235940899	chr1:235938182-235940899	1	2	2	0		0		4576	chr1	235938182	235940899	+	0		Intergenic	Intergenic	-55832	NR_102436	1130	Hs.532411	NM_000081	ENSG00000143669	LYST	CHS|CHS1	lysosomal trafficking regulator	protein-coding
4582	UPN4582	chr1	235971145	235972394	chr1:235971145-235972394	1	1	2	0		0		4582	chr1	235971145	235972394	+	0		Intergenic	Intergenic	-88061	NR_102436	1130	Hs.532411	NM_000081	ENSG00000143669	LYST	CHS|CHS1	lysosomal trafficking regulator	protein-coding
4583	UPN4583	chr1	235983402	235984069	chr1:235983402-235984069	1	1	1	0		0		4583	chr1	235983402	235984069	+	0		intron (NM_002508, intron 15 of 19)	intron (NM_002508, intron 15 of 19)	81446	NM_002508	4811	Hs.356624	NM_002508	ENSG00000116962	NID1	NID	nidogen 1	protein-coding
4585	UPN4585	chr1	235998894	235999978	chr1:235998894-235999978	1	1	1	0		0		4585	chr1	235998894	235999978	+	0		intron (NM_002508, intron 12 of 19)	intron (NM_002508, intron 12 of 19)	65745	NM_002508	4811	Hs.356624	NM_002508	ENSG00000116962	NID1	NID	nidogen 1	protein-coding
4595	UPN4595	chr1	236020527	236021705	chr1:236020527-236021705	1	1	1	0		0		4595	chr1	236020527	236021705	+	0		intron (NM_002508, intron 9 of 19)	intron (NM_002508, intron 9 of 19)	44065	NM_002508	4811	Hs.356624	NM_002508	ENSG00000116962	NID1	NID	nidogen 1	protein-coding
4597	UPN4597	chr1	236063673	236067594	chr1:236063673-236067594	1	1	2	0		0		4597	chr1	236063673	236067594	+	0		promoter-TSS (NM_002508)	promoter-TSS (NM_002508)	-452	NM_002508	4811	Hs.356624	NM_002508	ENSG00000116962	NID1	NID	nidogen 1	protein-coding
4612	UPN4612	chr1	243263908	243265564	chr1:243263908-243265564	1	1	1	0		0		4612	chr1	243263908	243265564	+	0		intron (NM_001350251, intron 1 of 20).2	intron (NM_001350251, intron 1 of 20).2	8731	NM_001350249	10806	Hs.591530	NM_006642	ENSG00000054282	SDCCAG8	BBS16|CCCAP|CCCAP SLSN7|HSPC085|NPHP10|NY-CO-8|SLSN7|hCCCAP	serologically defined colon cancer antigen 8	protein-coding
4613	UPN4613	chr1	243266624	243268686	chr1:243266624-243268686	1	1	1	0		0		4613	chr1	243266624	243268686	+	0		intron (NM_001350251, intron 1 of 20).2	intron (NM_001350251, intron 1 of 20).2	11650	NM_001350249	10806	Hs.591530	NM_006642	ENSG00000054282	SDCCAG8	BBS16|CCCAP|CCCAP SLSN7|HSPC085|NPHP10|NY-CO-8|SLSN7|hCCCAP	serologically defined colon cancer antigen 8	protein-coding
4619	UPN4619	chr1	243286687	243287500	chr1:243286687-243287500	1	1	1	0		0		4619	chr1	243286687	243287500	+	0		intron (NM_001350251, intron 5 of 20).2	intron (NM_001350251, intron 5 of 20).2	31088	NM_001350249	10806	Hs.591530	NM_006642	ENSG00000054282	SDCCAG8	BBS16|CCCAP|CCCAP SLSN7|HSPC085|NPHP10|NY-CO-8|SLSN7|hCCCAP	serologically defined colon cancer antigen 8	protein-coding
4620	UPN4620	chr1	243287834	243288654	chr1:243287834-243288654	1	1	1	0		0		4620	chr1	243287834	243288654	+	0		intron (NM_001350251, intron 5 of 20).2	AluJb|SINE|Alu	32239	NM_001350249	10806	Hs.591530	NM_006642	ENSG00000054282	SDCCAG8	BBS16|CCCAP|CCCAP SLSN7|HSPC085|NPHP10|NY-CO-8|SLSN7|hCCCAP	serologically defined colon cancer antigen 8	protein-coding
4622	UPN4622	chr1	243496199	243496690	chr1:243496199-243496690	1	1	1	0		0		4622	chr1	243496199	243496690	+	0		intron (NM_001350251, intron 20 of 20).2	intron (NM_001350251, intron 20 of 20).2	150268	NR_039824	100616343		NR_039824	ENSG00000265201	MIR4677	mir-4677	microRNA 4677	ncRNA
4624	UPN4624	chr1	243730082	243731688	chr1:243730082-243731688	1	1	1	0		0		4624	chr1	243730082	243731688	+	0		intron (NM_181690, intron 1 of 13).2	LTR2752|LTR|ERV1	112397	NM_181690	10000	Hs.498292	NM_005465	ENSG00000117020	AKT3	MPPH|MPPH2|PKB-GAMMA|PKBG|PRKBG|RAC-PK-gamma|RAC-gamma|STK-2	AKT serine/threonine kinase 3	protein-coding
4632	UPN4632	chr1	244214142	244214916	chr1:244214142-244214916	1	1	1	0		0		4632	chr1	244214142	244214916	+	0		Intergenic	Intergenic	-138106	NM_001276348	200159	Hs.442703	NM_001012970	ENSG00000173728	C1orf100	-	chromosome 1 open reading frame 100	protein-coding
4641	UPN4641	chr1	244321544	244323060	chr1:244321544-244323060	1	1	1	0		0		4641	chr1	244321544	244323060	+	0		Intergenic	AluSq2|SINE|Alu	-30333	NM_001276348	200159	Hs.442703	NM_001012970	ENSG00000173728	C1orf100	-	chromosome 1 open reading frame 100	protein-coding
4642	UPN4642	chr1	244323273	244324842	chr1:244323273-244324842	1	1	1	0		0		4642	chr1	244323273	244324842	+	0		Intergenic	MLT1C|LTR|ERVL-MaLR	-28578	NM_001276348	200159	Hs.442703	NM_001012970	ENSG00000173728	C1orf100	-	chromosome 1 open reading frame 100	protein-coding
4656	UPN4656	chr1	244964800	244965526	chr1:244964800-244965526	1	1	1	0		0		4656	chr1	244964800	244965526	+	0		TTS (NR_111907)	TTS (NR_111907)	-4706	NM_032328	84288	Hs.134857	NM_032328	ENSG00000203666	EFCAB2	CFAP200|DRC8	EF-hand calcium binding domain 2	protein-coding
4657	UPN4657	chr1	244968293	244969299	chr1:244968293-244969299	1	1	1	0		0		4657	chr1	244968293	244969299	+	0		non-coding (NR_111907, exon 2 of 2)	non-coding (NR_111907, exon 2 of 2)	-1073	NM_032328	84288	Hs.134857	NM_032328	ENSG00000203666	EFCAB2	CFAP200|DRC8	EF-hand calcium binding domain 2	protein-coding
4663	UPN4663	chr1	246568620	246572190	chr1:246568620-246572190	2	2	2	0		0		4663	chr1	246568620	246572190	+	0		intron (NM_001139459, intron 1 of 8)	intron (NM_001139459, intron 1 of 8)	4068	NM_152609	163882	Hs.368353	NM_152609	ENSG00000162852	CNST	C1orf71|PPP1R64	consortin, connexin sorting protein	protein-coding
4669	UPN4669	chr1	246608264	246609805	chr1:246608264-246609805	1	1	1	0		0		4669	chr1	246608264	246609805	+	0		intron (NM_152609, intron 2 of 10)	intron (NM_152609, intron 2 of 10)	42697	NM_152609	163882	Hs.368353	NM_152609	ENSG00000162852	CNST	C1orf71|PPP1R64	consortin, connexin sorting protein	protein-coding
4685	UPN4685	chr1	247360318	247361730	chr1:247360318-247361730	1	1	1	0		0		4685	chr1	247360318	247361730	+	0		Intergenic	LTR49-int|LTR|ERV1	-29084	NM_001329733	84838	Hs.168677	NM_032752	ENSG00000162714	ZNF496	NIZP1|ZFP496|ZKSCAN17|ZSCAN49	zinc finger protein 496	protein-coding
4687	UPN4687	chr1	247390918	247391251	chr1:247390918-247391251	1	1	1	0		0		4687	chr1	247390918	247391251	+	0		Intergenic	AluJr|SINE|Alu	-25072	NM_001079821	114548	Hs.159483	NM_004895	ENSG00000162711	NLRP3	AGTAVPRL|AII|AVP|C1orf7|CIAS1|CLR1.1|DFNA34|FCAS|FCAS1|FCU|KEFH|MWS|NALP3|PYPAF1	NLR family pyrin domain containing 3	protein-coding
4702	UPN4702	chr1	248857615	248858881	chr1:248857615-248858881	1	1	1	0		0		4702	chr1	248857615	248858881	+	0		exon (NM_017865, exon 2 of 12)	exon (NM_017865, exon 2 of 12)	678	NM_001136036	55657	Hs.377705	NM_017865	ENSG00000171163	ZNF692	AREBP|Zfp692	zinc finger protein 692	protein-coding
4708	UPN4708	chr10	133989	134845	chr10:133989-134845	1	1	1	0		0		4708	chr10	133989	134845	+	0		promoter-TSS (NM_006624)	promoter-TSS (NM_006624)	-48	NM_006624	10771	Hs.292265	NM_006624	ENSG00000015171	ZMYND11	BRAM1|BS69|MRD30	zinc finger MYND-type containing 11	protein-coding
4709	UPN4709	chr10	136041	137116	chr10:136041-137116	1	1	1	0		0		4709	chr10	136041	137116	+	0		intron (NM_001202464, intron 1 of 13)	intron (NM_001202464, intron 1 of 13)	1094	NM_001202464	10771	Hs.292265	NM_006624	ENSG00000015171	ZMYND11	BRAM1|BS69|MRD30	zinc finger MYND-type containing 11	protein-coding
4713	UPN4713	chr10	394128	395000	chr10:394128-395000	1	1	1	0		0		4713	chr10	394128	395000	+	0		intron (NM_014974, intron 10 of 36)	intron (NM_014974, intron 10 of 36)	-112478	NR_106988
4717	UPN4717	chr10	490886	492367	chr10:490886-492367	1	1	1	0		0		4717	chr10	490886	492367	+	0		intron (NM_014974, intron 1 of 36)	intron (NM_014974, intron 1 of 36)	-136938	NR_147612	101930421	Hs.654707	NR_147612	ENSG00000225140	LOC101930421	-	uncharacterized LOC101930421	ncRNA
4719	UPN4719	chr10	597716	598558	chr10:597716-598558	1	1	1	0		0		4719	chr10	597716	598558	+	0		intron (NM_014974, intron 1 of 36)	intron (NM_014974, intron 1 of 36)	-30427	NR_147612	101930421	Hs.654707	NR_147612	ENSG00000225140	LOC101930421	-	uncharacterized LOC101930421	ncRNA
4721	UPN4721	chr10	623727	626096	chr10:623727-626096	1	1	1	0		0		4721	chr10	623727	626096	+	0		intron (NM_014974, intron 1 of 36)	intron (NM_014974, intron 1 of 36)	-3653	NR_147612	101930421	Hs.654707	NR_147612	ENSG00000225140	LOC101930421	-	uncharacterized LOC101930421	ncRNA
4722	UPN4722	chr10	649932	651346	chr10:649932-651346	1	1	1	0		0		4722	chr10	649932	651346	+	0		intron (NM_001355387, intron 1 of 2)	intron (NM_001355387, intron 1 of 2)	691	NM_001355387	414235	Hs.587103	NM_001012714	ENSG00000180525	PRR26	C10orf108	proline rich 26	protein-coding
4724	UPN4724	chr10	682949	684418	chr10:682949-684418	2	1	1	0		0		4724	chr10	682949	684418	+	0		intron (NM_014974, intron 1 of 36)	intron (NM_014974, intron 1 of 36)	5985	NM_014974	22982	Hs.432397	NM_014974	ENSG00000151240	DIP2C	KIAA0934	disco interacting protein 2 homolog C	protein-coding
4730	UPN4730	chr10	932679	933154	chr10:932679-933154	1	1	1	0		0		4730	chr10	932679	933154	+	0		promoter-TSS (NR_120629)	promoter-TSS (NR_120629)	-110	NR_120629	101927762	Hs.151159	NR_120629	ENSG00000229869	LOC101927762	-	uncharacterized LOC101927762	ncRNA
4732	UPN4732	chr10	987363	988148	chr10:987363-988148	1	1	1	0		0		4732	chr10	987363	988148	+	0		promoter-TSS (NM_012341)	promoter-TSS (NM_012341)	-654	NM_012341	23560	Hs.215766	NM_012341	ENSG00000107937	GTPBP4	CRFG|NGB|NOG1	GTP binding protein 4	protein-coding
4739	UPN4739	chr10	3045758	3048153	chr10:3045758-3048153	1	1	1	0		0		4739	chr10	3045758	3048153	+	0		Intergenic	Intergenic	-20565	NM_001323068	5214	Hs.26010	NM_002627	ENSG00000067057	PFKP	ATP-PFK|PFK-C|PFK-P|PFKF	phosphofructokinase, platelet	protein-coding
4744	UPN4744	chr10	3094030	3096775	chr10:3094030-3096775	2	2	1	0		0		4744	chr10	3094030	3096775	+	0		intron (NM_001242339, intron 3 of 23)	MARNA|DNA|TcMar-Mariner	-9207	NM_001323073	5214	Hs.26010	NM_002627	ENSG00000067057	PFKP	ATP-PFK|PFK-C|PFK-P|PFKF	phosphofructokinase, platelet	protein-coding
4749	UPN4749	chr10	3263733	3264854	chr10:3263733-3264854	1	1	2	0		0		4749	chr10	3263733	3264854	+	0		Intergenic	Intergenic	-54402	NR_131187	105376360	Hs.212226	NR_131187		LOC105376360	-	uncharacterized LOC105376360	ncRNA
4750	UPN4750	chr10	3293375	3294701	chr10:3293375-3294701	1	1	1	0		0		4750	chr10	3293375	3294701	+	0		Intergenic	Intergenic	-24657	NR_131187	105376360	Hs.212226	NR_131187		LOC105376360	-	uncharacterized LOC105376360	ncRNA
4754	UPN4754	chr10	3465087	3466119	chr10:3465087-3466119	1	1	1	0		0		4754	chr10	3465087	3466119	+	0		intron (NR_131187, intron 1 of 1)	intron (NR_131187, intron 1 of 1)	37235	NR_155745	101927880		NR_155745		LOC101927880	-	uncharacterized LOC101927880	ncRNA
4755	UPN4755	chr10	3467073	3472663	chr10:3467073-3472663	2	2	2	0		0		4755	chr10	3467073	3472663	+	0		intron (NR_131187, intron 1 of 1)	MER2|DNA|TcMar-Tigger	32970	NR_155745	101927880		NR_155745		LOC101927880	-	uncharacterized LOC101927880	ncRNA
4756	UPN4756	chr10	3472882	3473829	chr10:3472882-3473829	1	1	1	0		0		4756	chr10	3472882	3473829	+	0		intron (NR_131187, intron 1 of 1)	intron (NR_131187, intron 1 of 1)	29483	NR_155745	101927880		NR_155745		LOC101927880	-	uncharacterized LOC101927880	ncRNA
4757	UPN4757	chr10	3483452	3485545	chr10:3483452-3485545	2	1	1	0		0		4757	chr10	3483452	3485545	+	0		intron (NR_131187, intron 1 of 1)	intron (NR_131187, intron 1 of 1)	18340	NR_155745	101927880		NR_155745		LOC101927880	-	uncharacterized LOC101927880	ncRNA
4772	UPN4772	chr10	3774950	3777642	chr10:3774950-3777642	2	1	1	0		0		4772	chr10	3774950	3777642	+	0		non-coding (NR_027653, exon 4 of 4)	non-coding (NR_027653, exon 4 of 4)	8985	NM_001160125	1316	Hs.4055	NM_001300	ENSG00000067082	KLF6	BCD1|CBA1|COPEB|CPBP|GBF|PAC1|ST12|ZF9	Kruppel like factor 6	protein-coding
4773	UPN4773	chr10	3778007	3782083	chr10:3778007-3782083	1	1	2	0		0		4773	chr10	3778007	3782083	+	0		intron (NM_001160125, intron 2 of 2)	intron (NM_001160125, intron 2 of 2)	5236	NM_001160125	1316	Hs.4055	NM_001300	ENSG00000067082	KLF6	BCD1|CBA1|COPEB|CPBP|GBF|PAC1|ST12|ZF9	Kruppel like factor 6	protein-coding
4776	UPN4776	chr10	3804217	3804893	chr10:3804217-3804893	1	1	1	0		0		4776	chr10	3804217	3804893	+	0		Intergenic	Intergenic	-19274	NR_027653	1316	Hs.4055	NM_001300	ENSG00000067082	KLF6	BCD1|CBA1|COPEB|CPBP|GBF|PAC1|ST12|ZF9	Kruppel like factor 6	protein-coding
4777	UPN4777	chr10	3805443	3812410	chr10:3805443-3812410	3	2	1	0		0		4777	chr10	3805443	3812410	+	0		Intergenic	(GT)n|Simple_repeat|Simple_repeat	-23645	NR_027653	1316	Hs.4055	NM_001300	ENSG00000067082	KLF6	BCD1|CBA1|COPEB|CPBP|GBF|PAC1|ST12|ZF9	Kruppel like factor 6	protein-coding
4780	UPN4780	chr10	3829385	3830146	chr10:3829385-3830146	1	1	1	0		0		4780	chr10	3829385	3830146	+	0		Intergenic	Intergenic	-4185	NR_134490	105376365	Hs.460114	NR_134490	ENSG00000230573	LOC105376365	-	uncharacterized LOC105376365	ncRNA
4783	UPN4783	chr10	3850459	3853999	chr10:3850459-3853999	3	2	1	0		0		4783	chr10	3850459	3853999	+	0		Intergenic	Intergenic	18279	NR_134490	105376365	Hs.460114	NR_134490	ENSG00000230573	LOC105376365	-	uncharacterized LOC105376365	ncRNA
4789	UPN4789	chr10	3872710	3873373	chr10:3872710-3873373	1	1	1	0		0		4789	chr10	3872710	3873373	+	0		Intergenic	Intergenic	39091	NR_134490	105376365	Hs.460114	NR_134490	ENSG00000230573	LOC105376365	-	uncharacterized LOC105376365	ncRNA
4790	UPN4790	chr10	3873988	3877278	chr10:3873988-3877278	1	2	1	0		0		4790	chr10	3873988	3877278	+	0		Intergenic	MIRb|SINE|MIR	41683	NR_134490	105376365	Hs.460114	NR_134490	ENSG00000230573	LOC105376365	-	uncharacterized LOC105376365	ncRNA
4793	UPN4793	chr10	3887072	3888535	chr10:3887072-3888535	1	1	1	0		0		4793	chr10	3887072	3888535	+	0		Intergenic	AluSz6|SINE|Alu	53853	NR_134490	105376365	Hs.460114	NR_134490	ENSG00000230573	LOC105376365	-	uncharacterized LOC105376365	ncRNA
4803	UPN4803	chr10	4005195	4005729	chr10:4005195-4005729	1	1	1	0		0		4803	chr10	4005195	4005729	+	0		Intergenic	Intergenic	14302	NR_106726	102464829		NR_106726	ENSG00000274809	MIR6078	hsa-mir-6078	microRNA 6078	ncRNA
4804	UPN4804	chr10	4051770	4052359	chr10:4051770-4052359	1	1	1	0		0		4804	chr10	4051770	4052359	+	0		non-coding (NR_120632, exon 1 of 4)	non-coding (NR_120632, exon 1 of 4)	338	NR_120632	101927964	Hs.737041	NR_120632	ENSG00000236990	LOC101927964	-	uncharacterized LOC101927964	ncRNA
4814	UPN4814	chr10	4131949	4132946	chr10:4131949-4132946	1	1	1	0		0		4814	chr10	4131949	4132946	+	0		Intergenic	(CACAGA)n|Simple_repeat|Simple_repeat	80721	NR_120632	101927964	Hs.737041	NR_120632	ENSG00000236990	LOC101927964	-	uncharacterized LOC101927964	ncRNA
4821	UPN4821	chr10	4263445	4264093	chr10:4263445-4264093	1	1	1	0		0		4821	chr10	4263445	4264093	+	0		Intergenic	L2|LINE|L2	-19857	NR_108040	100652988	Hs.433011	NR_108040		LINC00702	-	long intergenic non-protein coding RNA 702	ncRNA
4822	UPN4822	chr10	4279082	4282923	chr10:4279082-4282923	2	1	1	0		0		4822	chr10	4279082	4282923	+	0		Intergenic	MER34A1|LTR|ERV1	-37090	NR_108040	100652988	Hs.433011	NR_108040		LINC00702	-	long intergenic non-protein coding RNA 702	ncRNA
4824	UPN4824	chr10	4344927	4345619	chr10:4344927-4345619	1	1	1	0		0		4824	chr10	4344927	4345619	+	0		Intergenic	(GT)n|Simple_repeat|Simple_repeat	-38973	NR_108054	100507059	Hs.158438	NR_108054	ENSG00000224382	LINC00703	-	long intergenic non-protein coding RNA 703	ncRNA
4825	UPN4825	chr10	4352915	4354486	chr10:4352915-4354486	1	1	1	0		0		4825	chr10	4352915	4354486	+	0		Intergenic	Intergenic	-30546	NR_108054	100507059	Hs.158438	NR_108054	ENSG00000224382	LINC00703	-	long intergenic non-protein coding RNA 703	ncRNA
4829	UPN4829	chr10	4513785	4516038	chr10:4513785-4516038	2	2	2	0		0		4829	chr10	4513785	4516038	+	0		Intergenic	L2a|LINE|L2	108442	NR_108056	100507059	Hs.158438	NR_108054	ENSG00000224382	LINC00703	-	long intergenic non-protein coding RNA 703	ncRNA
4830	UPN4830	chr10	4661364	4662989	chr10:4661364-4662989	2	1	2	0		0		4830	chr10	4661364	4662989	+	0		non-coding (NR_015425, exon 3 of 3)	non-coding (NR_015425, exon 3 of 3)	6020	NR_015425	338588	Hs.121365	NR_015425		LINC00705	-	long intergenic non-protein coding RNA 705	ncRNA
4833	UPN4833	chr10	4678400	4678964	chr10:4678400-4678964	1	1	1	0		0		4833	chr10	4678400	4678964	+	0		promoter-TSS (NR_024475)	promoter-TSS (NR_024475)	-612	NR_024475	100216001	Hs.634869	NR_024475	ENSG00000231298	MANCR	LINC00704	mitotically associated long non coding RNA	ncRNA
4836	UPN4836	chr10	4771106	4772033	chr10:4771106-4772033	1	2	1	0		0		4836	chr10	4771106	4772033	+	0		Intergenic	Intergenic	-54608	NM_001271021	83592	Hs.657944	NM_031436	ENSG00000165568	AKR1E2	AKR1CL2|AKRDC1|LoopADR|TAKR|hTSP|htAKR	aldo-keto reductase family 1 member E2	protein-coding
4840	UPN4840	chr10	5291361	5292713	chr10:5291361-5292713	1	1	1	0		0		4840	chr10	5291361	5292713	+	0		Intergenic	Intergenic	-20801	NR_149060	110806285		NR_149060	ENSG00000224034	LINC02561	-	long intergenic non-protein coding RNA 2561	ncRNA
4845	UPN4845	chr10	5547265	5548577	chr10:5547265-5548577	1	1	1	0		0		4845	chr10	5547265	5548577	+	0		Intergenic	Intergenic	-21675	NR_120497	100132159	Hs.239600	NR_120496		CALML3-AS1	-	CALML3 antisense RNA 1	ncRNA
4854	UPN4854	chr10	5940608	5948472	chr10:5940608-5948472	1	2	3	0		0		4854	chr10	5940608	5948472	+	0		Intergenic	Intergenic	24388	NM_001351096	3601	Hs.445124	NM_002189	ENSG00000134470	IL15RA	CD215	interleukin 15 receptor subunit alpha	protein-coding
4856	UPN4856	chr10	5970919	5972300	chr10:5970919-5972300	1	1	1	0		0		4856	chr10	5970919	5972300	+	0		intron (NM_001256765, intron 1 of 7)	L2c|LINE|L2	-2681	NM_001351096	3601	Hs.445124	NM_002189	ENSG00000134470	IL15RA	CD215	interleukin 15 receptor subunit alpha	protein-coding
4857	UPN4857	chr10	5975452	5977097	chr10:5975452-5977097	1	1	1	0		0		4857	chr10	5975452	5977097	+	0		intron (NM_001256765, intron 1 of 7)	intron (NM_001256765, intron 1 of 7)	1337	NM_172200	3601	Hs.445124	NM_002189	ENSG00000134470	IL15RA	CD215	interleukin 15 receptor subunit alpha	protein-coding
4864	UPN4864	chr10	6051989	6053525	chr10:6051989-6053525	1	1	1	0		0		4864	chr10	6051989	6053525	+	0		intron (NM_000417, intron 1 of 7)	intron (NM_000417, intron 1 of 7)	9613	NM_000417	3559	Hs.231367	NM_000417	ENSG00000134460	IL2RA	CD25|IDDM10|IL2R|IMD41|TCGFR|p55	interleukin 2 receptor subunit alpha	protein-coding
4867	UPN4867	chr10	6066094	6066820	chr10:6066094-6066820	1	1	1	0		0		4867	chr10	6066094	6066820	+	0		Intergenic	Intergenic	-4087	NM_001308242	3559	Hs.231367	NM_000417	ENSG00000134460	IL2RA	CD25|IDDM10|IL2R|IMD41|TCGFR|p55	interleukin 2 receptor subunit alpha	protein-coding
4881	UPN4881	chr10	6150701	6152708	chr10:6150701-6152708	1	2	1	0		0		4881	chr10	6150701	6152708	+	0		promoter-TSS (NR_036111)	promoter-TSS (NR_036111)	-492	NR_036111	100422989		NR_036111	ENSG00000263628	MIR3155A	MIR3155|hsa-mir-3155a|mir-3155a	microRNA 3155a	ncRNA
4883	UPN4883	chr10	6162564	6165030	chr10:6162564-6165030	1	2	2	0		0		4883	chr10	6162564	6165030	+	0		intron (NM_001282630, intron 1 of 14)	CpG	-11535	NR_039698	100628560		NR_039698	ENSG00000283634	MIR3155B	hsa-mir-3155b	microRNA 3155b	ncRNA
4885	UPN4885	chr10	6172172	6172680	chr10:6172172-6172680	1	1	1	0		0		4885	chr10	6172172	6172680	+	0		intron (NM_001282630, intron 1 of 14)	intron (NM_001282630, intron 1 of 14)	-20164	NR_039698	100628560		NR_039698	ENSG00000283634	MIR3155B	hsa-mir-3155b	microRNA 3155b	ncRNA
4891	UPN4891	chr10	6195164	6197755	chr10:6195164-6197755	1	3	2	0		0		4891	chr10	6195164	6197755	+	0		intron (NM_001282630, intron 1 of 14)	MLT2A2|LTR|ERVL	-6418	NM_004566	5209	Hs.195471	NM_004566	ENSG00000170525	PFKFB3	IPFK2|PFK2|iPFK-2	6-phosphofructo-2-kinase/fructose-2,6-biphosphatase 3	protein-coding
4892	UPN4892	chr10	6200774	6205006	chr10:6200774-6205006	2	1	3	0		0		4892	chr10	6200774	6205006	+	0		promoter-TSS (NM_004566)	promoter-TSS (NM_004566)	13	NM_001323017	5209	Hs.195471	NM_004566	ENSG00000170525	PFKFB3	IPFK2|PFK2|iPFK-2	6-phosphofructo-2-kinase/fructose-2,6-biphosphatase 3	protein-coding
4897	UPN4897	chr10	6274507	6276262	chr10:6274507-6276262	1	1	2	0		0		4897	chr10	6274507	6276262	+	0		Intergenic	Intergenic	-51160	NR_040079	399715		NR_040079	ENSG00000215244	LOC399715	-	uncharacterized LOC399715	ncRNA
4902	UPN4902	chr10	6381906	6383371	chr10:6381906-6383371	1	1	1	0		0		4902	chr10	6381906	6383371	+	0		Intergenic	Intergenic	32322	NR_148966	399716	Hs.737229	NR_148966		LOC399716	-	uncharacterized LOC399716	ncRNA
4904	UPN4904	chr10	6399691	6400775	chr10:6399691-6400775	1	1	1	0		0		4904	chr10	6399691	6400775	+	0		intron (NM_001323267, intron 17 of 17)	L2a|LINE|L2	49917	NR_148966	399716	Hs.737229	NR_148966		LOC399716	-	uncharacterized LOC399716	ncRNA
4923	UPN4923	chr10	7259360	7260529	chr10:7259360-7260529	1	1	1	0		0		4923	chr10	7259360	7260529	+	0		intron (NM_001018039, intron 7 of 20)	intron (NM_001018039, intron 7 of 20)	-73160	NR_132972	106635547		NR_132972		SNORD129	-	small nucleolar RNA, C/D box 129	snoRNA
4927	UPN4927	chr10	7269867	7270720	chr10:7269867-7270720	1	1	1	0		0		4927	chr10	7269867	7270720	+	0		intron (NM_001018039, intron 7 of 20)	MLT1C|LTR|ERVL-MaLR	-83509	NR_132972	106635547		NR_132972		SNORD129	-	small nucleolar RNA, C/D box 129	snoRNA
4928	UPN4928	chr10	7300950	7302545	chr10:7300950-7302545	1	1	1	0		0		4928	chr10	7300950	7302545	+	0		intron (NM_001018039, intron 4 of 20)	intron (NM_001018039, intron 4 of 20)	107594	NM_001018039	57713	Hs.407983	NM_001018039	ENSG00000198879	SFMBT2	-	Scm like with four mbt domains 2	protein-coding
4929	UPN4929	chr10	7406633	7409381	chr10:7406633-7409381	1	1	1	0		0		4929	chr10	7406633	7409381	+	0		intron (NM_001029880, intron 1 of 20)	CpG	1334	NM_001018039	57713	Hs.407983	NM_001018039	ENSG00000198879	SFMBT2	-	Scm like with four mbt domains 2	protein-coding
4930	UPN4930	chr10	7410457	7413200	chr10:7410457-7413200	1	1	1	0		0		4930	chr10	7410457	7413200	+	0		promoter-TSS (NM_001029880)	promoter-TSS (NM_001029880)	-342	NM_001029880	57713	Hs.407983	NM_001018039	ENSG00000198879	SFMBT2	-	Scm like with four mbt domains 2	protein-coding
4936	UPN4936	chr10	7625167	7626655	chr10:7625167-7626655	1	1	2	0		0		4936	chr10	7625167	7626655	+	0		intron (NM_001001851, intron 5 of 11)	intron (NM_001001851, intron 5 of 11)	-6238	NM_032817	80760	Hs.498586	NM_030569	ENSG00000123243	ITIH5	ITI-HC5|PP14776	inter-alpha-trypsin inhibitor heavy chain family member 5	protein-coding
4943	UPN4943	chr10	8054693	8056312	chr10:8054693-8056312	1	1	2	0		0		4943	chr10	8054693	8056312	+	0		5' UTR (NM_002051, exon 2 of 6)	5' UTR (NM_002051, exon 2 of 6)	798	NM_002051	2625	Hs.524134	NM_002051	ENSG00000107485	GATA3	HDR|HDRS	GATA binding protein 3	protein-coding
4951	UPN4951	chr10	10830999	10831600	chr10:10830999-10831600	1	1	1	0		0		4951	chr10	10830999	10831600	+	0		intron (NM_001326326, intron 1 of 14)	intron (NM_001326326, intron 1 of 14)	32588	NM_001326328	10659	Hs.309288	NM_006561	ENSG00000048740	CELF2	BRUNOL3|CELF-2|CUG-BP2|CUGBP2|ETR-3|ETR3|NAPOR	CUGBP Elav-like family member 2	protein-coding
4952	UPN4952	chr10	10870758	10872069	chr10:10870758-10872069	1	1	1	0		0		4952	chr10	10870758	10872069	+	0		intron (NM_001326323, intron 3 of 17)	intron (NM_001326323, intron 3 of 17)	72702	NM_001326328	10659	Hs.309288	NM_006561	ENSG00000048740	CELF2	BRUNOL3|CELF-2|CUG-BP2|CUGBP2|ETR-3|ETR3|NAPOR	CUGBP Elav-like family member 2	protein-coding
4956	UPN4956	chr10	11144996	11149786	chr10:11144996-11149786	2	1	1	0		0		4956	chr10	11144996	11149786	+	0		intron (NM_001326334, intron 2 of 13)	intron (NM_001326334, intron 2 of 13)	-17490	NM_001326348	10659	Hs.309288	NM_006561	ENSG00000048740	CELF2	BRUNOL3|CELF-2|CUG-BP2|CUGBP2|ETR-3|ETR3|NAPOR	CUGBP Elav-like family member 2	protein-coding
4960	UPN4960	chr10	11161164	11163131	chr10:11161164-11163131	1	1	1	0		0		4960	chr10	11161164	11163131	+	0		intron (NM_001326334, intron 2 of 13)	intron (NM_001326334, intron 2 of 13)	-2734	NM_001326348	10659	Hs.309288	NM_006561	ENSG00000048740	CELF2	BRUNOL3|CELF-2|CUG-BP2|CUGBP2|ETR-3|ETR3|NAPOR	CUGBP Elav-like family member 2	protein-coding
4961	UPN4961	chr10	11164027	11164474	chr10:11164027-11164474	1	1	1	0		0		4961	chr10	11164027	11164474	+	0		promoter-TSS (NM_001326346)	promoter-TSS (NM_001326346)	-631	NM_001326348	10659	Hs.309288	NM_006561	ENSG00000048740	CELF2	BRUNOL3|CELF-2|CUG-BP2|CUGBP2|ETR-3|ETR3|NAPOR	CUGBP Elav-like family member 2	protein-coding
4963	UPN4963	chr10	11171558	11180657	chr10:11171558-11180657	4	2	2	0		0		4963	chr10	11171558	11180657	+	0		intron (NM_001326339, intron 2 of 11)	intron (NM_001326339, intron 2 of 11)	11077	NM_001083591	10659	Hs.309288	NM_006561	ENSG00000048740	CELF2	BRUNOL3|CELF-2|CUG-BP2|CUGBP2|ETR-3|ETR3|NAPOR	CUGBP Elav-like family member 2	protein-coding
4969	UPN4969	chr10	11823339	11823993	chr10:11823339-11823993	1	1	1	0		0		4969	chr10	11823339	11823993	+	0		intron (NM_153256, intron 1 of 3)	CpG	268	NM_153256	254427	Hs.435775	NM_153256	ENSG00000148426	PROSER2	C10orf47	proline and serine rich 2	protein-coding
4977	UPN4977	chr10	12333353	12334321	chr10:12333353-12334321	1	1	1	0		0		4977	chr10	12333353	12334321	+	0		Intergenic	Intergenic	-15706	NM_020397	57118	Hs.600547	NM_020397	ENSG00000183049	CAMK1D	CKLiK|CaM-K1|CaMKID	calcium/calmodulin dependent protein kinase ID	protein-coding
4978	UPN4978	chr10	12348275	12349020	chr10:12348275-12349020	1	1	1	0		0		4978	chr10	12348275	12349020	+	0		promoter-TSS (NM_020397)	promoter-TSS (NM_020397)	-896	NM_020397	57118	Hs.600547	NM_020397	ENSG00000183049	CAMK1D	CKLiK|CaM-K1|CaMKID	calcium/calmodulin dependent protein kinase ID	protein-coding
4983	UPN4983	chr10	12605424	12606390	chr10:12605424-12606390	1	1	1	0		0		4983	chr10	12605424	12606390	+	0		intron (NM_001351032, intron 4 of 11)	intron (NM_001351032, intron 4 of 11)	27154	NR_039700	100616151		NR_039700	ENSG00000263584	MIR4480	-	microRNA 4480	ncRNA
4985	UPN4985	chr10	12707673	12709187	chr10:12707673-12709187	1	1	1	0		0		4985	chr10	12707673	12709187	+	0		intron (NM_001351032, intron 5 of 11)	intron (NM_001351032, intron 5 of 11)	16923	NR_031752	100313841		NR_031752	ENSG00000221331	MIR548Q	-	microRNA 548q	ncRNA
4986	UPN4986	chr10	12844445	12845274	chr10:12844445-12845274	1	1	1	0		0		4986	chr10	12844445	12845274	+	0		Intergenic	Intergenic	-119506	NR_031752	100313841		NR_031752	ENSG00000221331	MIR548Q	-	microRNA 548q	ncRNA
4989	UPN4989	chr10	13100643	13101215	chr10:13100643-13101215	1	1	1	0		0		4989	chr10	13100643	13101215	+	0		intron (NM_021980, intron 1 of 13)	intron (NM_021980, intron 1 of 13)	847	NM_001008211	10133	Hs.332706	NM_021980	ENSG00000123240	OPTN	ALS12|FIP2|GLC1E|HIP7|HYPL|NRP|TFIIIA-INTP	optineurin	protein-coding
4991	UPN4991	chr10	13300140	13302064	chr10:13300140-13302064	2	1	2	0		0		4991	chr10	13300140	13302064	+	0		promoter-TSS (NM_006214)	promoter-TSS (NM_006214)	-972	NM_001323083	5264	Hs.498732	NM_006214	ENSG00000107537	PHYH	LN1|LNAP1|PAHX|PHYH1|RD	phytanoyl-CoA 2-hydroxylase	protein-coding
4992	UPN4992	chr10	13346322	13346754	chr10:13346322-13346754	1	1	1	0		0		4992	chr10	13346322	13346754	+	0		intron (NM_001195604, intron 1 of 7)	intron (NM_001195604, intron 1 of 7)	1760	NM_001195602	22929	Hs.124027	NM_012247	ENSG00000086475	SEPHS1	SELD|SPS|SPS1	selenophosphate synthetase 1	protein-coding
4996	UPN4996	chr10	13684336	13684788	chr10:13684336-13684788	1	1	1	0		0		4996	chr10	13684336	13684788	+	0		intron (NM_001318337, intron 14 of 23)	intron (NM_001318337, intron 14 of 23)	23005	NM_001318338	55691	Hs.330463	NM_018027	ENSG00000151474	FRMD4A	CCAFCA|FRMD4|bA295P9.4	FERM domain containing 4A	protein-coding
[truncated: 11,716 more rows]

## Sheet: Legend
Supplementary File 3. H3K27ac and H3k4me1 double positive enhancers in term pregnant not in labor human myometrial specimens.
