# Supplementary material for: Assessment of the histone mark-based epigenomic landscape in human myometrium at term pregnancy
Source: eLife. 2025 Jun 10;13:RP95897. doi: 10.7554/eLife.95897 (PMC12151536; doi:10.7554/eLife.95897)
Supplement: Supplementary file 8. — DEG, differentially expressed genes between denoted gRNAs. [file elife-95897-supp8.xlsx]

## Sheet: Legend
Supplementary File 8. CRISPRa dependent gene expression patterns in hTERT-HM cells and gRNA information. DEG, Differentially expressed genes between denoted gRNAs.

## Sheet: gRNA_Feature_Reference
gRNA ID	gRNA Name	gRNA Sequence	Chr	Strand	Start	End	Target Name	Note
gRNA-2	PLCL1-1	TCGAGTACATTAGCCCCGCT	chr2	+	197804404	197804423	PLCL1
gRNA-11	PLCL1-10	GAATTATGGCCAGTGGGTGC	chr2	-	198281252	198281271	PLCL1
gRNA-3	PLCL1-2	TCAGCCGTGCGTATTTTCCG	chr2	+	198242920	198242939	PLCL1
gRNA-4	PLCL1-3	CTGCCTCAATTGACGACACC	chr2	+	198242273	198242292	PLCL1
gRNA-5	PLCL1-4	GCCATAACTAATTATAGTGC	chr2	-	198252966	198252985	PLCL1
gRNA-6	PLCL1-5	GCGCGCGTGTGCAAACCCGG	chr2	-	197804366	197804385	PLCL1
gRNA-7	PLCL1-6	CTAAAGTATTAAGTAGAGTG	chr2	+	198234537	198234556	PLCL1
gRNA-8	PLCL1-7	TGGATGAAATGTGGTCGATA	chr2	+	198234764	198234783	PLCL1
gRNA-9	PLCL1-8	CAGTCCTAAGTCTACTTACT	chr2	+	198251501	198251520	PLCL1
gRNA-10	PLCL1-9	CGTGAGCAGCACTTTCAGAT	chr2	-	198273145	198273164	PLCL1
gRNA-12	PLCL2-1	GACCACATTACACGTTTTGG	chr3	-	16801343	16801362	PLCL2
gRNA-13	PLCL2-2	GAGTCGAGTTCTACAGTCAT	chr3	+	16807584	16807603	PLCL2
gRNA-14	PLCL2-3	GCCTGGCCGCTATAGACTAT	chr3	+	16826357	16826376	PLCL2
gRNA-15	PLCL2-4	GCTGAAACTGTATGTCGTAT	chr3	+	16844454	16844473	PLCL2
gRNA-16	PLCL2-5	GCAGTCAGTCATAGCGTTGT	chr3	+	16850071	16850090	PLCL2
gRNA-17	PLCL2-6	ATCATTGAGCCAAAGATCTC	chr3	-	16875673	16875692	PLCL2
gRNA-18	PLCL2-7	GCGCACGGTTAAAGTCGCGG	chr3	-	16884844	16884863	PLCL2
gRNA-19	PLCL2-8	GCGCCAAAAATAACCCGCGC	chr3	-	16884697	16884716	PLCL2
gRNA-52	UPN12727.1	TAAGAACGCGAGAAGCTGAG	chr12	-	47802143	47802162	UPN12727
gRNA-51	UPN12727.2	GACCGCGTCTAGTCCAGACC	chr12	+	47801664	47801683	UPN12727
gRNA-50	UPN15925.1	TAACCCGTCTGGATAACTAG	chr13	-	110360694	110360713	UPN15925
gRNA-49	UPN15925.2	TGACGTACAACTTCCGATGT	chr13	-	110361550	110361569	UPN15925
gRNA-58	UPN1669.1	AGCAACCTTACGCTGACGGA	chr1	-	40385093	40385112	UPN1669
gRNA-57	UPN1669.2	GGGCGCCAATCACTAGGGAT	chr1	+	40394249	40394268	UPN1669
gRNA-48	UPN19218.1	GCGCGTAAGGAACTCGGTGA	chr15	+	64893551	64893570	UPN19218
gRNA-47	UPN19218.2	TCGGGCGTCTAAACATAGCG	chr15	-	64894306	64894325	UPN19218
gRNA-46	UPN22334.1	TCGGGGGGTAACCGACGCCA	chr16	+	88302155	88302174	UPN22334
gRNA-45	UPN22334.2	ACACGTCCCCATCGCACTGT	chr16	+	88304304	88304323	UPN22334
gRNA-44	UPN22605.1	AGGCGGCCGAAAATTACCCA	chr17	+	2175375	2175394	UPN22605
gRNA-43	UPN22605.2	GCCGACCCCGAACATATTGG	chr17	-	2178658	2178677	UPN22605
gRNA-42	UPN23770.1	CTCAAGAATGTAGTATACGG	chr17	-	39980101	39980120	UPN23770
gRNA-41	UPN23770.2	TCGCGTTAACCCTCGCACCG	chr17	-	39980907	39980926	UPN23770
gRNA-40	UPN29573.1	TATGTAGTAGGGTCCTAGAG	chr2	-	20430030	20430049	UPN29573
gRNA-39	UPN29573.2	ATCACCCTGGTTGTCTCGTG	chr2	-	20429426	20429445	UPN29573
gRNA-38	UPN37347.1	CCTCGCTAGCGGGATCTGGT	chr22	+	36913935	36913954	UPN37347
gRNA-37	UPN40232.1	GCGCCACAGGACCGTCAAAG	chr3	+	123386017	123386036	UPN40232
gRNA-36	UPN40232.2	CTAGCTAACTTGCGGCTGGA	chr3	-	123385626	123385645	UPN40232
gRNA-35	UPN40642.1	ACGGAGACTCTAATGGACCA	chr3	-	141403710	141403729	UPN40642
gRNA-34	UPN40642.2	GTTCTGTCAGCAATTGTCGT	chr3	+	141404257	141404276	UPN40642
gRNA-33	UPN40649.1	TTCTAACACCCCGTCACGTG	chr3	+	141432014	141432033	UPN40649
gRNA-32	UPN40649.2	AACCAGGCGGACCAACAGTC	chr3	-	141433007	141433026	UPN40649
gRNA-56	UPN4116.1	TGATCGGGCTACTTGCGAGA	chr1	+	180154072	180154091	UPN4116
gRNA-55	UPN4116.2	TCGCTGCGGGGGTAGCCTCG	chr1	-	180154541	180154560	UPN4116
gRNA-31	UPN46532.1	TCTCGGTTCGAATCCAGACG	chr5	-	169636916	169636935	UPN46532
gRNA-30	UPN46532.2	TCAGTTCTTCGCGCCAAACT	chr5	+	169637647	169637666	UPN46532
gRNA-29	UPN46534.1	AATAATGGATCCTCGGTAAG	chr5	+	169875741	169875760	UPN46534
gRNA-28	UPN46534.2	GTAAACCCTCACGATGCCCT	chr5	+	169875392	169875411	UPN46534
gRNA-27	UPN46545.1	TACTCTTACACTCTCGACCG	chr5	-	170280549	170280568	UPN46545
gRNA-26	UPN46545.2	TCGGTCGAGAGTGTAAGAGT	chr5	+	170280548	170280567	UPN46545
gRNA-25	UPN52156.1	ATCGTAAGCATGGCTAGACA	chr7	+	116226782	116226801	UPN52156
gRNA-24	UPN52156.2	AACGTATTGTGGTCCCGTAT	chr7	+	116221332	116221351	UPN52156
gRNA-23	UPN52453.1	GTTCTGGAGGTTATGCCGCC	chr7	-	134701557	134701576	UPN52453
gRNA-22	UPN52453.2	TCATTGACCCCCGCTATTCC	chr7	-	134703377	134703396	UPN52453
gRNA-21	UPN56548.1	CGTAGGGCCAAAGGCAGTTC	chr9	+	93121698	93121717	UPN56548
gRNA-20	UPN56548.2	GGCAATGTAGCATTGGCCGC	chr9	-	93120211	93120230	UPN56548
gRNA-54	UPN9390.1	GCTCAGCCACAAATAAAGCG	chr11	+	33692208	33692227	UPN9390
gRNA-53	UPN9390.2	CAATTGCGCGAGGCCCATGA	chr11	+	33689728	33689747	UPN9390
gRNA-1	Scrambled_capt	GCACTACCAGAGCTAACTCA					Non-Targeting
gRNA-59	Stuffer+AarI	TTTTTTGTACACCTGCACCG					Non-Targeting	Empty gRNA expression vector

## Sheet: gRNA-2vsgRNA1-DEG
Gene	p_val	avg_log2FC	pct.1	pct.2	p_val_adj
PLCL1	1.09e-31	2.38716	0.875	0.09	2.75e-27
SHISAL2B	1.14e-08	0.115477	0.083	0	0.000289377
AC018752.1	1.14e-08	0.115477	0.083	0	0.000289377
AP003392.1	1.14e-08	0.115477	0.083	0	0.000289377
SPANXN4	1.14e-08	0.115477	0.083	0	0.000289377
AL603839.3	9.79e-08	0.444539	0.375	0.066	0.00247405
AGBL4	1.85e-07	0.162564	0.125	0.005	0.00466499
AL135791.1	1.85e-07	0.162564	0.125	0.005	0.00466499
SULT1A1	3.1e-06	0.158898	0.125	0.008	0.0783925
TUBB2B	5.94e-06	0.218707	0.083	0.003	0.150117
C3AR1	6.11e-06	0.111792	0.083	0.003	0.154399
LINC00649	6.11e-06	0.111792	0.083	0.003	0.154399
AC069547.2	2.35e-05	0.155241	0.125	0.01	0.593408
AC015802.6	2.35e-05	0.155241	0.125	0.01	0.593408
CCDC151	2.35e-05	0.155241	0.125	0.01	0.593408
NECAB1	2.47e-05	0.151593	0.125	0.01	0.625499
RIPOR1	3.75e-05	0.478996	0.667	0.284	0.94695
CAMK2A	4.76e-05	0.222265	0.208	0.033	1
C19orf12	5.44e-05	0.463126	0.667	0.271	1
AL691432.4	5.67e-05	0.0588937	0.042	0	1
AJAP1	5.67e-05	0.273018	0.042	0	1
RBP7	5.67e-05	0.0588937	0.042	0	1
C1orf167	5.67e-05	0.0588937	0.042	0	1
AGMAT	5.67e-05	0.0588937	0.042	0	1
AL662907.3	5.67e-05	0.0588937	0.042	0	1
HEYL	5.67e-05	0.0588937	0.042	0	1
TMEM125	5.67e-05	0.0588937	0.042	0	1
AL139289.1	5.67e-05	0.0588937	0.042	0	1
BX004807.1	5.67e-05	0.0588937	0.042	0	1
ERICH3-AS1	5.67e-05	0.0588937	0.042	0	1
DPYD-IT1	5.67e-05	0.0588937	0.042	0	1
BCL2L15	5.67e-05	0.0588937	0.042	0	1
TENT5C	5.67e-05	0.0588937	0.042	0	1
ILDR2	5.67e-05	0.0588937	0.042	0	1
LINC01686	5.67e-05	0.0588937	0.042	0	1
C1orf115	5.67e-05	0.0588937	0.042	0	1
HIST3H2BB	5.67e-05	0.0588937	0.042	0	1
LINC01939	5.67e-05	0.0588937	0.042	0	1
AC068286.2	5.67e-05	0.0588937	0.042	0	1
C2orf15	5.67e-05	0.0588937	0.042	0	1
AC018878.1	5.67e-05	0.0588937	0.042	0	1
AC093787.2	5.67e-05	0.0588937	0.042	0	1
AC005042.2	5.67e-05	0.0588937	0.042	0	1
AC074290.2	5.67e-05	0.0588937	0.042	0	1
SYN2	5.67e-05	0.0588937	0.042	0	1
TMPPE	5.67e-05	0.0588937	0.042	0	1
ITGA9	5.67e-05	0.0588937	0.042	0	1
LRRC2-AS1	5.67e-05	0.0588937	0.042	0	1
RASSF1-AS1	5.67e-05	0.0588937	0.042	0	1
SYNPR-AS1	5.67e-05	0.0588937	0.042	0	1
CASR	5.67e-05	0.0588937	0.042	0	1
AC112482.2	5.67e-05	0.0588937	0.042	0	1
AC093001.1	5.67e-05	0.0588937	0.042	0	1
AC117453.1	5.67e-05	0.0588937	0.042	0	1
OSTN	5.67e-05	0.0588937	0.042	0	1
ABLIM2	5.67e-05	0.0588937	0.042	0	1
AC021148.2	5.67e-05	0.0588937	0.042	0	1
AC023154.1	5.67e-05	0.0588937	0.042	0	1
NPNT	5.67e-05	0.0588937	0.042	0	1
LINC00499	5.67e-05	0.0588937	0.042	0	1
AC084740.1	5.67e-05	0.0588937	0.042	0	1
KLKB1	5.67e-05	0.0588937	0.042	0	1
LINC02236	5.67e-05	0.0588937	0.042	0	1
AC010273.2	5.67e-05	0.0588937	0.042	0	1
AC104118.1	5.67e-05	0.0588937	0.042	0	1
AC005740.3	5.67e-05	0.0588937	0.042	0	1
AC011337.1	5.67e-05	0.0588937	0.042	0	1
AC146507.3	5.67e-05	0.0588937	0.042	0	1
AIF1	5.67e-05	0.0588937	0.042	0	1
IP6K3	5.67e-05	0.0588937	0.042	0	1
PI16	5.67e-05	0.0588937	0.042	0	1
PRPH2	5.67e-05	0.0588937	0.042	0	1
OOEP-AS1	5.67e-05	0.0588937	0.042	0	1
AC073957.2	5.67e-05	0.0588937	0.042	0	1
CARD11	5.67e-05	0.115477	0.042	0	1
AC092171.5	5.67e-05	0.0588937	0.042	0	1
AGR2	5.67e-05	0.0588937	0.042	0	1
AC004837.2	5.67e-05	0.0588937	0.042	0	1
AC006355.2	5.67e-05	0.0588937	0.042	0	1
STEAP2-AS1	5.67e-05	0.0588937	0.042	0	1
AC073130.2	5.67e-05	0.0588937	0.042	0	1
GHET1	5.67e-05	0.0588937	0.042	0	1
TDRP	5.67e-05	0.115477	0.042	0	1
AC104964.1	5.67e-05	0.0588937	0.042	0	1
AC105206.3	5.67e-05	0.0588937	0.042	0	1
ANK1	5.67e-05	0.169925	0.042	0	1
AC100805.1	5.67e-05	0.0588937	0.042	0	1
AC027250.2	5.67e-05	0.0588937	0.042	0	1
TTPA	5.67e-05	0.0588937	0.042	0	1
AC138646.1	5.67e-05	0.0588937	0.042	0	1
SLC10A5	5.67e-05	0.0588937	0.042	0	1
AP002852.1	5.67e-05	0.0588937	0.042	0	1
FAM166B	5.67e-05	0.0588937	0.042	0	1
GAS1	5.67e-05	0.0588937	0.042	0	1
SUSD3	5.67e-05	0.115477	0.042	0	1
AL596247.1	5.67e-05	0.0588937	0.042	0	1
SLC22A18AS	5.67e-05	0.0588937	0.042	0	1
OR10A3	5.67e-05	0.0588937	0.042	0	1
AC104031.1	5.67e-05	0.0588937	0.042	0	1
SYT12	5.67e-05	0.0588937	0.042	0	1
MMP1	5.67e-05	0.0588937	0.042	0	1
AP001924.1	5.67e-05	0.0588937	0.042	0	1
AC129102.1	5.67e-05	0.0588937	0.042	0	1
IAPP	5.67e-05	0.0588937	0.042	0	1
HOXC5	5.67e-05	0.0588937	0.042	0	1
LINC02426	5.67e-05	0.0588937	0.042	0	1
AC117505.1	5.67e-05	0.0588937	0.042	0	1
RFX4	5.67e-05	0.0588937	0.042	0	1
AC087893.2	5.67e-05	0.0588937	0.042	0	1
CABP1	5.67e-05	0.0588937	0.042	0	1
AL158196.1	5.67e-05	0.0588937	0.042	0	1
AL137244.1	5.67e-05	0.0588937	0.042	0	1
LINC00397	5.67e-05	0.0588937	0.042	0	1
AL138689.2	5.67e-05	0.0588937	0.042	0	1
AL160237.1	5.67e-05	0.0588937	0.042	0	1
AL136418.1	5.67e-05	0.0588937	0.042	0	1
LINC02301	5.67e-05	0.0588937	0.042	0	1
LINC02316	5.67e-05	0.0588937	0.042	0	1
LINC02330	5.67e-05	0.0588937	0.042	0	1
AL157912.1	5.67e-05	0.0588937	0.042	0	1
LINC00637	5.67e-05	0.0588937	0.042	0	1
AC090510.1	5.67e-05	0.0588937	0.042	0	1
SPESP1	5.67e-05	0.0588937	0.042	0	1
AC079322.1	5.67e-05	0.0588937	0.042	0	1
ODF3L1	5.67e-05	0.0588937	0.042	0	1
SV2B	5.67e-05	0.0588937	0.042	0	1
AJ003147.1	5.67e-05	0.115477	0.042	0	1
AC026401.1	5.67e-05	0.0588937	0.042	0	1
NPIPB7	5.67e-05	0.0588937	0.042	0	1
AC145285.3	5.67e-05	0.115477	0.042	0	1
AC116348.2	5.67e-05	0.0588937	0.042	0	1
NKD1	5.67e-05	0.0588937	0.042	0	1
LINC00922	5.67e-05	0.0588937	0.042	0	1
TERB1	5.67e-05	0.0588937	0.042	0	1
AC005224.2	5.67e-05	0.0588937	0.042	0	1
AC002553.1	5.67e-05	0.0588937	0.042	0	1
HNF1B	5.67e-05	0.0588937	0.042	0	1
PPP1R1B	5.67e-05	0.0588937	0.042	0	1
IKZF3	5.67e-05	0.0588937	0.042	0	1
HOXB-AS3	5.67e-05	0.0588937	0.042	0	1
PHOSPHO1	5.67e-05	0.0588937	0.042	0	1
AC091180.3	5.67e-05	0.0588937	0.042	0	1
AC015795.1	5.67e-05	0.0588937	0.042	0	1
AC005856.1	5.67e-05	0.0588937	0.042	0	1
SMIM6	5.67e-05	0.0588937	0.042	0	1
GALR2	5.67e-05	0.0588937	0.042	0	1
AC021683.5	5.67e-05	0.115477	0.042	0	1
AC022809.1	5.67e-05	0.0588937	0.042	0	1
DENND1C	5.67e-05	0.0588937	0.042	0	1
MUC16	5.67e-05	0.0588937	0.042	0	1
TSSK6	5.67e-05	0.0588937	0.042	0	1
AC020907.3	5.67e-05	0.0588937	0.042	0	1
AC067969.1	5.67e-05	0.0588937	0.042	0	1
SRRM5	5.67e-05	0.0588937	0.042	0	1
FUT2	5.67e-05	0.115477	0.042	0	1
HSD17B14	5.67e-05	0.0588937	0.042	0	1
COX6B2	5.67e-05	0.0588937	0.042	0	1
AC012313.9	5.67e-05	0.0588937	0.042	0	1
LINC01730	5.67e-05	0.0588937	0.042	0	1
AL133520.1	5.67e-05	0.0588937	0.042	0	1
UCKL1-AS1	5.67e-05	0.0588937	0.042	0	1
AC007663.3	5.67e-05	0.0588937	0.042	0	1
SLC5A4	5.67e-05	0.0588937	0.042	0	1
AL021308.1	5.67e-05	0.0588937	0.042	0	1
CT47B1	5.67e-05	0.115477	0.042	0	1
TTTY14	5.67e-05	0.0588937	0.042	0	1
PPP1R1C	9.09e-05	0.189561	0.167	0.023	1
AL035446.1	9.99e-05	0.254687	0.125	0.013	1
PCDHGB7	0.000100156	0.182366	0.167	0.023	1
AC007879.3	0.000107771	0.151593	0.125	0.013	1
AP000240.1	0.000107771	0.151593	0.125	0.013	1
AL356441.1	0.000146362	0.108117	0.083	0.005	1
AL158835.1	0.000146362	0.108117	0.083	0.005	1
AC007622.2	0.000146362	0.108117	0.083	0.005	1
AC048382.6	0.000146362	0.108117	0.083	0.005	1
EDDM13	0.000146362	0.108117	0.083	0.005	1
MATN4	0.000146362	0.108117	0.083	0.005	1
C2CD6	0.000152619	0.10445	0.083	0.005	1
SKIL	0.00018165	0.498886	1	0.777	1
MTX1	0.000264515	0.482872	0.917	0.675	1
SENP3	0.000284391	0.229049	0.25	0.056	1
DNAJB2	0.000349003	0.405793	0.417	0.151	1
AC087623.2	0.000354226	0.147955	0.125	0.015	1
PLEKHG6	0.000354226	0.147955	0.125	0.015	1
HMGCS1	0.000423568	0.37071	0.333	0.102	1
HIP1R	0.000479571	0.279819	0.25	0.061	1
LINC01500	0.000521899	0.197543	0.208	0.043	1
AC025442.2	0.000574087	0.294743	0.292	0.082	1
MAP1A	0.000633889	0.574482	0.833	0.522	1
CCDC142	0.000803063	0.178781	0.167	0.031	1
BAIAP2-DT	0.000803063	0.178781	0.167	0.031	1
FRA10AC1	0.000899829	0.488487	0.625	0.34	1
PTCH2	0.000920723	0.144325	0.125	0.018	1
AC018464.1	0.00095667	0.373123	0.458	0.187	1
AMT	0.00100513	0.10445	0.083	0.008	1
ZIC1	0.00100513	0.10445	0.083	0.008	1
AC012629.2	0.00100513	0.10445	0.083	0.008	1
AC008264.2	0.00100513	0.10445	0.083	0.008	1
AC069360.1	0.00100513	0.10445	0.083	0.008	1
CGNL1	0.00100513	0.10445	0.083	0.008	1
AC004034.1	0.00100513	0.10445	0.083	0.008	1
DNAH17	0.00100513	0.10445	0.083	0.008	1
AL390198.1	0.00100513	0.10445	0.083	0.008	1
LINC01311	0.00100513	0.10445	0.083	0.008	1
PLA2G6	0.00100513	0.10445	0.083	0.008	1
MT1E	0.00103398	-0.989596	0.875	0.849	1
TNFSF10	0.00103891	0.0971454	0.083	0.008	1
ASGR1	0.00103891	0.100793	0.083	0.008	1
AL110114.1	0.00103891	0.100793	0.083	0.008	1
ATF7IP2	0.00107367	0.0971454	0.083	0.008	1
AFDN	0.00110423	0.438431	0.583	0.297	1
SDF4	0.00121359	0.448633	1	0.762	1
WDR90	0.00140093	0.175206	0.167	0.033	1
GRK2	0.00143787	0.344238	0.417	0.166	1
ZNF57	0.00145209	0.168081	0.167	0.033	1
ZNF337	0.00151835	0.218707	0.292	0.087	1
SVBP	0.00156113	0.450202	0.75	0.437	1
SURF4	0.00169505	0.372496	0.958	0.747	1
STK17A	0.0017568	0.539796	0.917	0.729	1
BCKDK	0.00176073	0.369104	0.792	0.537	1
TCIRG1	0.00193284	0.557766	0.667	0.44	1
DGKA	0.00200188	0.357684	0.583	0.289	1
FABP6	0.00201663	0.140705	0.125	0.02	1
RAB9B	0.00201663	0.140705	0.125	0.02	1
TBCE.1	0.00208236	0.137094	0.125	0.02	1
RRM2	0.00213475	-1.0456	0.125	0.419	1
AC090578.1	0.00220795	0.208086	0.167	0.036	1
PSMD14	0.00222121	0.353892	1	0.89	1
ABHD10	0.00224945	0.35811	0.458	0.205	1
HSD17B1	0.00229809	0.171639	0.167	0.036	1
BDNF	0.00232862	0.697114	0.833	0.703	1
SLC26A2	0.00242504	0.365151	0.417	0.174	1
PEX5	0.00245723	0.160992	0.167	0.036	1
LIMD2	0.00254684	0.194045	0.208	0.054	1
PLPP5	0.00254865	0.416884	0.875	0.583	1
RFT1	0.00256652	-0.39179	0	0.281	1
LRCH3	0.0026222	-0.464685	0.125	0.471	1
NXPH4	0.00267924	0.228715	0.292	0.095	1
MTF1	0.00278557	0.215387	0.292	0.095	1
CD302	0.00278656	0.296151	0.625	0.299	1
MNT	0.00280265	0.308905	0.292	0.1	1
YAP1	0.00289838	0.4411	0.875	0.645	1
MT2A	0.00309693	-0.69314	1	0.99	1
R3HCC1	0.0031032	0.41962	0.708	0.404	1
ZBTB5	0.0031859	0.218707	0.167	0.038	1
F8A3	0.00354704	0.187076	0.208	0.056	1
REEP6	0.00356167	0.189561	0.125	0.023	1
SEC24B	0.00357528	0.402479	0.542	0.284	1
SLC25A20	0.00357921	0.168081	0.167	0.038	1
OSBP	0.00359317	0.556766	0.583	0.366	1
CUL3	0.00360806	-0.605864	0.333	0.596	1
TRIM52-AS1	0.00366225	0.398326	0.333	0.133	1
ZNF865	0.00366797	0.187076	0.208	0.056	1
L3MBTL1	0.00366798	0.183604	0.208	0.056	1
AC079305.1	0.00367934	0.100793	0.083	0.01	1
AC021016.3	0.00367934	0.100793	0.083	0.01	1
AC116424.1	0.00367934	0.100793	0.083	0.01	1
SPAG5-AS1	0.00367934	0.100793	0.083	0.01	1
AC006449.2	0.00367934	0.100793	0.083	0.01	1
ABCA6	0.00367934	0.100793	0.083	0.01	1
AL050403.2	0.00367934	0.100793	0.083	0.01	1
AL022328.4	0.00367934	0.100793	0.083	0.01	1
CREB3L1	0.00369126	0.437764	0.875	0.67	1
PRKX	0.00369369	0.164532	0.167	0.038	1
IFI27L1	0.00372576	-0.511372	0.333	0.65	1
CHST12	0.00377438	0.346582	0.708	0.404	1
HSPA2	0.00379241	0.183604	0.208	0.056	1
EYA1	0.00381126	0.160992	0.167	0.038	1
AC025159.1	0.00384975	0.225371	0.292	0.1	1
ATP10D	0.00396636	0.316005	0.708	0.373	1
LUM	0.00399778	0.133491	0.125	0.023	1
PRPF4B	0.00402148	-0.326202	0.292	0.634	1
OXTR	0.00423835	0.727172	0.792	0.542	1
TNFAIP2	0.00427694	0.295936	0.458	0.21	1
ZNF625	0.00430069	0.218707	0.292	0.1	1
CATSPER1	0.00430073	0.212074	0.292	0.1	1
CINP	0.00441299	0.413937	0.792	0.509	1
HSD11B1L	0.00454704	0.353637	0.375	0.164	1
HOXA10-AS	0.00455749	0.356784	0.375	0.159	1
XIAP	0.00469319	0.376772	0.708	0.458	1
VIM	0.00484881	0.269337	1	1	1
CLIC3	0.00490572	0.268633	0.5	0.233	1
PRPF8	0.00492484	0.437717	0.875	0.629	1
FAM89B	0.00501722	-0.562236	0.333	0.624	1
METRNL	0.00511245	0.611531	0.792	0.665	1
PTPMT1	0.00521867	0.34261	0.667	0.394	1
FAF2	0.00534118	0.420519	0.792	0.514	1
ROR2	0.00538478	0.235985	0.208	0.061	1
MPPE1	0.00540015	0.432111	0.417	0.207	1
AAMDC	0.00563753	0.523069	0.833	0.724	1
EIF4G3	0.00581498	0.384197	0.917	0.77	1
NUDT14	0.00588115	0.41826	0.583	0.348	1
FCGR2A	0.00637026	0.182366	0.125	0.026	1
NPRL3	0.0063944	0.319943	0.5	0.253	1
CAPN5	0.00639696	0.208769	0.292	0.105	1
STX6	0.00657837	0.401571	0.5	0.274	1
SCAI	0.00665909	-0.409566	0.042	0.299	1
NRXN1	0.00677044	0.133491	0.125	0.026	1
RFLNB	0.00693636	0.4663	0.917	0.657	1
PUSL1	0.00695231	0.392277	0.625	0.355	1
IL6ST	0.00696856	-0.564007	0.417	0.734	1
CSE1L	0.00704237	0.501271	0.583	0.366	1
KCNIP4	0.00713837	0.126314	0.125	0.026	1
TRPC6	0.00713837	0.126314	0.125	0.026	1
FGD6	0.00716577	0.274518	0.25	0.087	1
RNF213	0.00716884	-0.417329	0.292	0.616	1
UCHL1-AS1	0.00731535	0.111792	0.042	0.003	1
TCL1A	0.00731535	0.111792	0.042	0.003	1
TVP23A	0.00731535	0.111792	0.042	0.003	1
AC007448.4	0.00731535	0.111792	0.042	0.003	1
DNAJB6	0.00747116	0.339816	1	0.934	1
FO704657.1	0.00747657	0.0552086	0.042	0.003	1
AL020997.4	0.00747657	0.0552086	0.042	0.003	1
MYCL	0.00747657	0.0552086	0.042	0.003	1
AL033527.2	0.00747657	0.0552086	0.042	0.003	1
ARTN	0.00747657	0.0552086	0.042	0.003	1
COL11A1	0.00747657	0.0552086	0.042	0.003	1
MYBPHL	0.00747657	0.0552086	0.042	0.003	1
PIFO	0.00747657	0.0552086	0.042	0.003	1
LCE4A	0.00747657	0.0552086	0.042	0.003	1
AL355388.2	0.00747657	0.0552086	0.042	0.003	1
TDRD5	0.00747657	0.0552086	0.042	0.003	1
GPR37L1	0.00747657	0.0552086	0.042	0.003	1
AL391811.1	0.00747657	0.0552086	0.042	0.003	1
TMEM178A	0.00747657	0.0552086	0.042	0.003	1
AC093159.1	0.00747657	0.0552086	0.042	0.003	1
AC009309.1	0.00747657	0.0552086	0.042	0.003	1
ACOXL	0.00747657	0.0552086	0.042	0.003	1
AC012442.2	0.00747657	0.0552086	0.042	0.003	1
DLX2-DT	0.00747657	0.0552086	0.042	0.003	1
UNC80	0.00747657	0.0552086	0.042	0.003	1
AC073476.3	0.00747657	0.0552086	0.042	0.003	1
SRGAP3	0.00747657	0.0552086	0.042	0.003	1
LINC01980	0.00747657	0.0552086	0.042	0.003	1
SCN10A	0.00747657	0.0552086	0.042	0.003	1
LIMD1-AS1	0.00747657	0.0552086	0.042	0.003	1
CD86	0.00747657	0.0552086	0.042	0.003	1
AL449214.1	0.00747657	0.0552086	0.042	0.003	1
LPP-AS1	0.00747657	0.0552086	0.042	0.003	1
SLC26A1	0.00747657	0.0552086	0.042	0.003	1
AC097512.1	0.00747657	0.0552086	0.042	0.003	1
AC107068.1	0.00747657	0.0552086	0.042	0.003	1
AC110809.1	0.00747657	0.0552086	0.042	0.003	1
PF4V1	0.00747657	0.0552086	0.042	0.003	1
AC096759.2	0.00747657	0.0552086	0.042	0.003	1
AC107072.2	0.00747657	0.0552086	0.042	0.003	1
SLC10A6	0.00747657	0.0552086	0.042	0.003	1
HSD17B13	0.00747657	0.0552086	0.042	0.003	1
AC108159.1	0.00747657	0.0552086	0.042	0.003	1
AC004067.1	0.00747657	0.0552086	0.042	0.003	1
AC104407.1	0.00747657	0.0552086	0.042	0.003	1
SCRG1	0.00747657	0.0552086	0.042	0.003	1
AC008966.3	0.00747657	0.0552086	0.042	0.003	1
AC008592.2	0.00747657	0.0552086	0.042	0.003	1
AC093535.1	0.00747657	0.0552086	0.042	0.003	1
PCDHGA2	0.00747657	0.0552086	0.042	0.003	1
FGFR4	0.00747657	0.0552086	0.042	0.003	1
AL139231.1	0.00747657	0.0552086	0.042	0.003	1
AL645939.5	0.00747657	0.0552086	0.042	0.003	1
CRIP3	0.00747657	0.0552086	0.042	0.003	1
AL360175.1	0.00747657	0.0552086	0.042	0.003	1
CNR1	0.00747657	0.0552086	0.042	0.003	1
AL357141.1	0.00747657	0.0552086	0.042	0.003	1
CALHM4	0.00747657	0.0552086	0.042	0.003	1
TMEM244	0.00747657	0.0552086	0.042	0.003	1
SCIN	0.00747657	0.0552086	0.042	0.003	1
AC105001.1	0.00747657	0.0552086	0.042	0.003	1
FAM66D	0.00747657	0.0552086	0.042	0.003	1
NAT2	0.00747657	0.0552086	0.042	0.003	1
HR	0.00747657	0.0552086	0.042	0.003	1
AC009879.4	0.00747657	0.0552086	0.042	0.003	1
AP005717.2	0.00747657	0.0552086	0.042	0.003	1
SMILR	0.00747657	0.0552086	0.042	0.003	1
AC104316.2	0.00747657	0.0552086	0.042	0.003	1
AC109322.2	0.00747657	0.0552086	0.042	0.003	1
DMRTA1	0.00747657	0.0552086	0.042	0.003	1
LINGO2	0.00747657	0.0552086	0.042	0.003	1
BX088651.2	0.00747657	0.0552086	0.042	0.003	1
C9orf170	0.00747657	0.0552086	0.042	0.003	1
AL353150.1	0.00747657	0.0552086	0.042	0.003	1
AL133477.2	0.00747657	0.0552086	0.042	0.003	1
FRRS1L	0.00747657	0.0552086	0.042	0.003	1
AL807752.5	0.00747657	0.0552086	0.042	0.003	1
OIT3	0.00747657	0.0552086	0.042	0.003	1
CNNM1	0.00747657	0.0552086	0.042	0.003	1
LINC01001	0.00747657	0.0552086	0.042	0.003	1
CNGA4	0.00747657	0.0552086	0.042	0.003	1
HSPB2	0.00747657	0.0552086	0.042	0.003	1
AP000866.6	0.00747657	0.0552086	0.042	0.003	1
AC021054.1	0.00747657	0.0552086	0.042	0.003	1
ANO2	0.00747657	0.0552086	0.042	0.003	1
AC122685.1	0.00747657	0.0552086	0.042	0.003	1
AC025165.2	0.00747657	0.0552086	0.042	0.003	1
AC026124.2	0.00747657	0.0552086	0.042	0.003	1
GLIPR1L1	0.00747657	0.0552086	0.042	0.003	1
AC107032.2	0.00747657	0.0552086	0.042	0.003	1
AC126178.1	0.00747657	0.0552086	0.042	0.003	1
AC069503.1	0.00747657	0.0552086	0.042	0.003	1
PRMT5-AS1	0.00747657	0.0552086	0.042	0.003	1
REC8	0.00747657	0.0552086	0.042	0.003	1
AC008056.2	0.00747657	0.0552086	0.042	0.003	1
AL049840.3	0.00747657	0.0552086	0.042	0.003	1
OTUD7A	0.00747657	0.0552086	0.042	0.003	1
AC110048.2	0.00747657	0.0552086	0.042	0.003	1
AC022558.2	0.00747657	0.0552086	0.042	0.003	1
AC068831.6	0.00747657	0.0552086	0.042	0.003	1
GLIS2-AS1	0.00747657	0.0552086	0.042	0.003	1
LINC02130	0.00747657	0.0552086	0.042	0.003	1
AC005632.6	0.00747657	0.0552086	0.042	0.003	1
LINC02175	0.00747657	0.0552086	0.042	0.003	1
AC026470.2	0.00747657	0.0552086	0.042	0.003	1
AC127024.6	0.00747657	0.0552086	0.042	0.003	1
AC005899.7	0.00747657	0.0552086	0.042	0.003	1
PNMT	0.00747657	0.0552086	0.042	0.003	1
C17orf64	0.00747657	0.0552086	0.042	0.003	1
FSCN2	0.00747657	0.0552086	0.042	0.003	1
AC110597.3	0.00747657	0.0552086	0.042	0.003	1
AC027307.1	0.00747657	0.0552086	0.042	0.003	1
AC005306.1	0.00747657	0.0552086	0.042	0.003	1
INSR	0.00747657	0.0552086	0.042	0.003	1
HSH2D	0.00747657	0.0552086	0.042	0.003	1
AC008761.1	0.00747657	0.0552086	0.042	0.003	1
ZBTB32	0.00747657	0.0552086	0.042	0.003	1
AC020928.1	0.00747657	0.0552086	0.042	0.003	1
ZNF571	0.00747657	0.0552086	0.042	0.003	1
LILRB3	0.00747657	0.0552086	0.042	0.003	1
SIRPG	0.00747657	0.0552086	0.042	0.003	1
UBOX5-AS1	0.00747657	0.0552086	0.042	0.003	1
CHGB	0.00747657	0.0552086	0.042	0.003	1
PLCG1-AS1	0.00747657	0.0552086	0.042	0.003	1
CU633906.1	0.00747657	0.0552086	0.042	0.003	1
AP000696.1	0.00747657	0.0552086	0.042	0.003	1
AF064858.1	0.00747657	0.0552086	0.042	0.003	1
AP001053.1	0.00747657	0.0552086	0.042	0.003	1
RAB36	0.00747657	0.0552086	0.042	0.003	1
LIF-AS1	0.00747657	0.0552086	0.042	0.003	1
AL022322.2	0.00747657	0.0552086	0.042	0.003	1
AL021878.2	0.00747657	0.0552086	0.042	0.003	1
MAP7D2	0.00747657	0.0552086	0.042	0.003	1
AL109946.1	0.00747657	0.0552086	0.042	0.003	1
ALG13-AS1	0.00747657	0.0552086	0.042	0.003	1
FMR1-AS1	0.00747657	0.0552086	0.042	0.003	1
AC116666.1	0.00747657	0.0552086	0.042	0.003	1
SPAG17	0.00764133	0.051533	0.042	0.003	1
AC096642.1	0.00764133	0.051533	0.042	0.003	1
AC008696.2	0.00764133	0.051533	0.042	0.003	1
NRN1	0.00764133	0.051533	0.042	0.003	1
PMF1	0.00787038	-0.495756	0.375	0.632	1
KAZALD1	0.00802792	0.181409	0.25	0.084	1
MAP2K1	0.00816208	0.463691	0.708	0.478	1
QDPR	0.00816262	0.332297	0.708	0.468	1
PHACTR1	0.00828473	0.188119	0.25	0.084	1
CREG1	0.00830378	0.281228	0.25	0.09	1
RARA-AS1	0.00843708	0.238885	0.458	0.215	1
MSTO1	0.00860084	0.221931	0.333	0.136	1
YPEL5	0.00862858	0.452487	0.667	0.417	1
STAT5B	0.00865088	-0.368895	0.042	0.304	1
ANLN	0.0087592	-0.848972	0.125	0.386	1
AL589740.1	0.00885657	0.303596	0.083	0.013	1
AL512625.3	0.00888917	0.166367	0.208	0.064	1
AKTIP	0.00890715	0.221931	0.333	0.136	1
DKK2	0.00906348	0.147955	0.083	0.013	1
IER2	0.00906537	0.393577	0.958	0.808	1
THAP11	0.00916815	-0.34496	0.042	0.302	1
RAD9A	0.00919922	0.316142	0.333	0.143	1
SNX2	0.00925628	0.438875	0.625	0.465	1
CDK2	0.00926367	-0.369115	0	0.225	1
AC090197.1	0.00928643	0.242166	0.25	0.09	1
RPS21	0.00930364	-0.285783	1	1	1
SH3BP5-AS1	0.00937858	0.0971454	0.083	0.013	1
CDS1	0.00937858	0.0971454	0.083	0.013	1
GDNF-AS1	0.00937858	0.0971454	0.083	0.013	1
AL158071.1	0.00937858	0.0971454	0.083	0.013	1
AC004803.1	0.00937858	0.0971454	0.083	0.013	1
AC015712.4	0.00937858	0.0971454	0.083	0.013	1
ZNF17	0.00937858	0.0971454	0.083	0.013	1
ACTL10	0.00937858	0.0971454	0.083	0.013	1
SEPTIN5	0.00937858	0.0971454	0.083	0.013	1
MED14OS	0.00937858	0.0971454	0.083	0.013	1
MOCS2	0.00948835	0.346772	0.958	0.698	1
AC005632.3	0.00959676	0.0935068	0.083	0.013	1
S100B	0.00959676	0.0935068	0.083	0.013	1
KDM4B	0.00973608	0.284231	0.458	0.228	1
EIF6	0.0097942	-0.37978	1	0.959	1
DAB2	0.00980476	0.346488	0.833	0.665	1
HOXB7	0.00983244	-0.435709	0.167	0.422	1
UBE2D1	0.0098348	0.303596	0.625	0.376	1
CNTN3	0.0101254	0.208769	0.25	0.087	1
NAP1L5	0.0101698	0.283802	0.333	0.143	1
FGFR1	0.0101924	0.298806	0.542	0.286	1
CCDC84	0.0102875	-0.348977	0	0.22	1
STXBP6	0.010384	0.408411	0.417	0.202	1
TYSND1	0.0104545	0.18014	0.208	0.066	1
ATG2A	0.0104545	0.18014	0.208	0.066	1
AL137024.1	0.0104925	0.175206	0.125	0.028	1
TMEM9B	0.0106032	0.422721	0.667	0.414	1
CBX8	0.0106241	0.15746	0.167	0.046	1
EPB41	0.0108207	0.396012	0.458	0.246	1
RDH11	0.010846	0.346715	0.708	0.496	1
RARB	0.0108958	0.390888	0.417	0.207	1
SAMD5	0.0109082	0.150423	0.167	0.046	1
CFLAR-AS1	0.0109153	0.129898	0.125	0.028	1
DNAJC28	0.0109153	0.129898	0.125	0.028	1
CSRNP2	0.0109154	0.242166	0.25	0.092	1
ANKRA2	0.0109236	0.202181	0.292	0.113	1
ANKRD11	0.0109679	-0.431521	0.958	0.923	1
TMEM44	0.0111587	0.280108	0.417	0.202	1
HSPB7	0.0111842	0.126314	0.125	0.028	1
USP9X	0.0112266	0.31592	0.833	0.568	1
C6orf120	0.0112714	-0.344102	0.042	0.276	1
PSG1	0.0114585	0.119172	0.125	0.028	1
SYNGR2	0.0115817	0.235425	0.25	0.092	1
AC002480.2	0.0116267	0.205472	0.25	0.09	1
BANF1	0.0116526	0.398885	1	0.98	1
PPIA	0.0116671	0.178995	1	1	1
ARRDC3	0.0117002	0.159529	0.208	0.066	1
DIAPH3	0.0117819	-0.768354	0.292	0.522	1
AL359764.3	0.0117982	0.13993	0.167	0.046	1
DEK	0.0118849	-0.604415	0.875	0.921	1
RERE	0.0119096	-0.500797	0.458	0.65	1
RILPL2	0.011942	-0.34496	0.042	0.289	1
IPO11	0.0119841	0.228715	0.25	0.092	1
FNTA	0.0120767	-0.450751	0.25	0.486	1
LDOC1	0.0121789	-0.318868	0.083	0.361	1
SCFD2	0.0123486	0.389148	0.583	0.402	1
WDR20	0.0124465	0.333571	0.542	0.297	1
PDCD2	0.0124669	-0.447109	0.375	0.665	1
ATOX1	0.0125732	0.183617	1	1	1
RAB32	0.0126267	-0.437735	0.958	0.957	1
AC068279.2	0.0126794	-0.316753	0	0.21	1
POLA2	0.0128375	-0.348977	0	0.21	1
TEDC1	0.0128648	-0.36339	0	0.21	1
PRPF38B	0.0131144	-0.406897	0.25	0.488	1
KIF23	0.0133617	-0.63982	0.083	0.312	1
CRIM1-DT	0.0135872	0.415889	0.625	0.417	1
INTS2	0.014089	0.274518	0.25	0.095	1
HSPB1	0.0141199	0.32488	1	0.997	1
CNN3	0.0143589	0.333259	1	0.859	1
MECP2	0.0144719	-0.353477	0.083	0.332	1
TSPAN17	0.0146369	0.315864	0.292	0.128	1
PANO1	0.0146974	0.150423	0.167	0.049	1
ARRB1	0.0146974	0.150423	0.167	0.049	1
FAM114A1	0.0148958	0.260979	1	0.951	1
TMEM9	0.015017	0.373637	0.583	0.376	1
AL359834.1	0.0150675	0.146917	0.167	0.049	1
KRT80	0.0151247	0.149334	0.208	0.069	1
GPN3	0.0154432	-0.478205	0.375	0.601	1
PACSIN3	0.0154734	-0.350907	0.083	0.33	1
ECHDC1	0.0156159	-0.404729	0.375	0.621	1
LIMA1	0.0156368	0.296293	1	0.99	1
AP2B1	0.0157463	0.302618	0.875	0.652	1
FSTL3	0.0157543	0.35455	0.75	0.532	1
PDHA1	0.0161323	0.42206	0.875	0.639	1
TCEAL9	0.0161639	0.331148	1	0.972	1
VEZF1	0.0164498	-0.363505	0.042	0.258	1
AC138696.2	0.0165262	0.126314	0.125	0.031	1
LINC02489	0.0165262	0.126314	0.125	0.031	1
HYKK	0.0165262	0.126314	0.125	0.031	1
PODNL1	0.0165262	0.126314	0.125	0.031	1
KIAA1755	0.0165262	0.126314	0.125	0.031	1
KXD1	0.0165904	-0.347396	0.25	0.519	1
AL627171.2	0.0166355	0.48775	0.625	0.422	1
SNF8	0.0167251	0.28421	1	0.969	1
CIPC	0.0169014	0.115614	0.125	0.031	1
ADNP-AS1	0.0169014	0.119172	0.125	0.031	1
SLITRK4	0.0169014	0.122738	0.125	0.031	1
DNAJB1	0.0170924	-0.39912	0.208	0.468	1
STEAP3	0.0173122	0.228401	0.292	0.123	1
HMGXB4	0.0179338	-0.397324	0.333	0.591	1
NCF4	0.0179415	0.147955	0.083	0.015	1
PSMB7	0.0179443	-0.353764	1	0.992	1
NCAPG	0.0180301	-0.393068	0.083	0.335	1
FKBP10	0.0180351	0.323238	0.875	0.816	1
RAC3	0.0180999	0.256675	0.292	0.125	1
NIPAL2	0.0181869	-0.286821	0	0.192	1
KIF22	0.0182213	-0.402437	0.167	0.412	1
NHS	0.0182912	-0.363505	0.042	0.253	1
ASF1B	0.0183774	-0.328554	0	0.192	1
NUDC	0.0184397	0.293442	1	0.957	1
AFAP1L1	0.018475	0.211854	0.208	0.074	1
CMC2	0.0184905	-0.448847	0.667	0.831	1
HAGH	0.0187909	0.278615	1	0.714	1
HSPA8	0.0188295	-0.480781	1	0.997	1
PARP11	0.0188629	0.150423	0.167	0.051	1
FURIN	0.0188923	0.244703	0.542	0.299	1
MICAL3	0.0189155	-0.379406	0.083	0.304	1
KANK2	0.0189209	0.367571	0.667	0.45	1
RALB	0.0190134	0.345341	0.625	0.432	1
LINC01715	0.019038	0.0935068	0.083	0.015	1
SH3D21	0.019038	0.0935068	0.083	0.015	1
AL162258.2	0.019038	0.0935068	0.083	0.015	1
AC092567.1	0.019038	0.0935068	0.083	0.015	1
DPPA4	0.019038	0.0935068	0.083	0.015	1
HOXA-AS3	0.019038	0.0935068	0.083	0.015	1
AC132192.2	0.019038	0.0935068	0.083	0.015	1
AC026765.3	0.019038	0.0935068	0.083	0.015	1
RNASEH2B-AS1	0.019038	0.0935068	0.083	0.015	1
GOLGA6L4	0.019038	0.0935068	0.083	0.015	1
AC009054.2	0.019038	0.0935068	0.083	0.015	1
TINCR	0.019038	0.0935068	0.083	0.015	1
LIME1	0.019038	0.0935068	0.083	0.015	1
CPEB4	0.0193406	0.365631	0.542	0.327	1
CD274	0.0193449	0.377197	0.542	0.343	1
CCNL1	0.0193858	0.376447	0.417	0.235	1
MCFD2	0.0194041	0.26014	1	0.98	1
ST8SIA4	0.0194196	0.0898774	0.083	0.015	1
ANPEP	0.0194503	0.482376	0.667	0.545	1
PRELID2	0.0197122	-0.416346	0.208	0.46	1
DUSP16	0.0197762	0.13993	0.167	0.051	1
ATG14	0.0198038	0.328625	0.375	0.189	1
OARD1	0.0201109	0.398789	0.458	0.274	1
STK11	0.0201326	-0.271618	0	0.187	1
RWDD3	0.0201571	-0.350907	0.125	0.35	1
NFRKB	0.020166	0.215387	0.25	0.1	1
APIP	0.0202431	-0.373868	0.333	0.591	1
SEPTIN2	0.0202458	0.314285	0.917	0.934	1
NEK3	0.0202459	0.13993	0.167	0.051	1
AL645465.1	0.0203923	0.24894	0.208	0.077	1
KIFC1	0.0205574	-0.443824	0.042	0.246	1
NR1D1	0.020632	0.188119	0.208	0.074	1
ACSS2	0.0206495	0.341119	0.333	0.164	1
PSMA3-AS1	0.0208599	0.26525	0.417	0.21	1
USP53	0.0211001	0.317111	0.667	0.45	1
LOXL3	0.0211755	-0.358306	0.083	0.299	1
RGMB	0.0211805	0.25491	0.708	0.448	1
RANBP1	0.0212342	-0.473958	1	0.987	1
OLMALINC	0.0212976	0.162944	0.208	0.074	1
MBIP	0.0213156	0.349952	0.583	0.373	1
BTBD3	0.0213323	-0.286821	0	0.184	1
RNASET2	0.0216773	0.227567	0.417	0.21	1
BTBD8	0.0219802	0.201634	0.208	0.077	1
ADIPOR2	0.0222195	0.260528	0.542	0.315	1
TBC1D31	0.0222987	-0.262419	0	0.182	1
PHF14	0.0223257	-0.274672	0	0.182	1
UBE3D	0.0223494	0.221833	0.333	0.153	1
DHX36	0.0223909	-0.409635	0.458	0.657	1
RMI1	0.0223986	-0.277718	0	0.182	1
AC005291.2	0.0224029	0.181409	0.25	0.1	1
SLC16A1	0.0225371	0.261616	0.458	0.261	1
FAM111B	0.0226641	-0.348977	0	0.182	1
LINC02755	0.0227539	0.24894	0.208	0.077	1
OGA	0.0227899	0.27848	0.583	0.353	1
TRAPPC5	0.0229741	0.276041	1	0.974	1
ACOT8	0.0230026	0.246084	0.5	0.279	1
TTC39C	0.0230896	-0.317892	0.083	0.297	1
HSBP1	0.0231282	0.234022	1	0.997	1
TRAF3IP1	0.023273	0.346212	0.375	0.207	1
SMARCA5	0.0232948	-0.364728	0.417	0.719	1
HNRNPK	0.0233749	0.306814	1	0.982	1
RTRAF	0.0234983	0.313988	1	0.957	1
COX5A	0.0235418	0.270289	1	0.997	1
C5orf24	0.023641	0.447124	0.625	0.527	1
SEC13	0.0236791	0.276193	0.875	0.668	1
DGUOK-AS1	0.0237729	0.122738	0.125	0.033	1
ACCS	0.0237729	0.122738	0.125	0.033	1
ANO8	0.0237729	0.122738	0.125	0.033	1
BFSP1	0.0237729	0.122738	0.125	0.033	1
DLGAP4-AS1	0.0237729	0.122738	0.125	0.033	1
DUBR	0.0239172	0.256675	0.292	0.133	1
SERPINB6	0.0240554	0.31947	0.917	0.857	1
DENND1B	0.0242723	0.115614	0.125	0.033	1
IER3	0.0247378	0.538674	1	0.98	1
ZNF674-AS1	0.02478	0.10147	0.125	0.033	1
AC097448.1	0.024832	0.143419	0.167	0.054	1
ZSCAN29	0.024832	0.13993	0.167	0.054	1
NSMF	0.0248799	0.164769	0.25	0.1	1
C21orf58	0.0249088	-0.295866	0	0.176	1
NEIL3	0.0250132	-0.34026	0	0.176	1
GNPTAB	0.0250731	0.20761	0.5	0.269	1
SNCA	0.0251352	0.258236	0.417	0.22	1
FBXO7	0.0252044	0.271175	0.667	0.422	1
GTPBP4	0.0252767	-0.381257	0.417	0.662	1
TRAPPC6A	0.0252776	0.277869	0.208	0.079	1
ZYG11A	0.0253946	0.13993	0.167	0.054	1
ACIN1	0.0253967	-0.442204	0.417	0.619	1
MARVELD1	0.0255013	-0.310221	0.042	0.238	1
THAP4	0.0255428	-0.295866	0.042	0.238	1
HOOK2	0.0255447	-0.301625	0.042	0.238	1
AGPAT2	0.0256901	0.31947	0.75	0.496	1
TGDS	0.0259552	-0.256254	0	0.174	1
KIAA1324	0.026029	0.18476	0.208	0.077	1
LAMTOR2	0.0262036	0.299546	1	0.895	1
TTLL11	0.0263996	0.205032	0.208	0.079	1
SYNJ2BP	0.0264437	-0.303574	0.125	0.355	1
STX3	0.0264539	0.156123	0.208	0.077	1
AC118549.1	0.0264915	0.239011	0.667	0.422	1
POLR2H	0.0265562	-0.397516	0.708	0.765	1
TBCA	0.0266718	0.157775	1	1	1
CCND3	0.0268233	-0.359369	0.25	0.46	1
GATD1	0.0270124	-0.315157	0.083	0.289	1
LRRC8A	0.0270975	0.36018	0.375	0.217	1
SMARCD2	0.0272651	0.212658	0.375	0.184	1
MIS18A	0.0275748	-0.38724	0.083	0.284	1
PCYT2	0.0276598	0.286094	0.375	0.202	1
TTK	0.0277098	-0.36339	0	0.171	1
COG1	0.0282014	0.172904	0.292	0.128	1
ASB1	0.0282834	0.235581	0.625	0.379	1
WDR3	0.0284064	-0.284278	0.042	0.233	1
PKN1	0.0284916	0.363097	0.625	0.501	1
DCAKD	0.028593	0.234406	0.333	0.164	1
PPP3CC	0.0286557	0.205212	0.5	0.279	1
CHMP7	0.0286637	-0.243844	0	0.169	1
MTM1	0.0286928	-0.246956	0	0.169	1
PCGF6	0.0286934	-0.253161	0	0.169	1
TBC1D9	0.0287966	0.230882	0.375	0.192	1
GGT7	0.0288599	0.258657	0.333	0.166	1
RBM17	0.0288956	-0.346492	0.458	0.67	1
ATP13A2	0.0290589	0.206978	0.417	0.215	1
MYH10	0.0290773	-0.335706	0.042	0.23	1
SGCB	0.0291076	-0.370371	0.708	0.777	1
FBXL5	0.0291838	0.327758	0.625	0.453	1
SERTAD3	0.0294748	0.302686	0.625	0.432	1
CTDSPL	0.0295864	-0.334001	0.125	0.348	1
VEPH1	0.0297441	-0.465045	0.542	0.683	1
EVA1B	0.0298791	0.304864	0.958	0.916	1
DYNLL1	0.0298969	0.174788	1	1	1
POR	0.0299187	0.24762	0.417	0.225	1
C1R	0.0299233	-0.292978	0.042	0.23	1
SOX30	0.0299772	0.171639	0.125	0.036	1
PTPRQ	0.0299772	0.222265	0.125	0.036	1
AC006305.1	0.0299772	0.171639	0.125	0.036	1
HIGD1A	0.0299818	0.294695	0.833	0.706	1
ZDHHC8	0.0300685	-0.237598	0	0.166	1
ACP1	0.0301196	-0.347396	0.75	0.839	1
AL137186.2	0.0302599	0.363097	0.458	0.294	1
RSPRY1	0.0304749	0.224288	0.458	0.253	1
CMTM3	0.0304926	0.215588	0.333	0.161	1
PRPF38A	0.0305368	0.300866	0.458	0.281	1
TENM3-AS1	0.0305689	0.168081	0.125	0.036	1
WAPL	0.0308874	0.27848	0.583	0.379	1
KRT34	0.0309049	0.364182	0.25	0.113	1
SMG1	0.0309473	-0.3126	0.167	0.409	1
RPL39	0.0310446	0.122329	1	1	1
GRB2	0.0311701	0.299231	0.875	0.726	1
B4GALT3	0.0312178	0.215848	0.458	0.253	1
GNG5	0.0312433	0.16393	1	1	1
TRIM25	0.0313721	0.249339	0.333	0.166	1
ALAD	0.0316363	-0.234465	0	0.164	1
KDM5A	0.031641	-0.198475	0.25	0.491	1
KLHL29	0.0318983	-0.280759	0	0.164	1
DOCK4	0.0319255	-0.350314	0.083	0.279	1
NDC80	0.0319612	-0.490244	0.042	0.23	1
ZRANB2	0.0323553	0.305122	0.917	0.816	1
BCL2L2	0.032756	0.268209	0.375	0.194	1
NRDC	0.0327775	0.285929	0.917	0.813	1
IDH1-AS1	0.0327817	0.119172	0.125	0.036	1
PCDHGA10	0.0327817	0.119172	0.125	0.036	1
CEP135	0.0327903	-0.304496	0.042	0.225	1
PDE7A	0.0328324	0.164769	0.25	0.105	1
ZNF260	0.0328325	0.161463	0.25	0.105	1
MAN1A2	0.0328526	0.329739	0.625	0.504	1
VPS8	0.0330185	-0.368797	0.125	0.325	1
AL136456.1	0.0331705	0.0898774	0.083	0.018	1
PKDCC	0.0331705	0.0898774	0.083	0.018	1
AL589684.1	0.0331705	0.0898774	0.083	0.018	1
SPDYE1	0.0331705	0.0898774	0.083	0.018	1
AC104051.2	0.0331705	0.0898774	0.083	0.018	1
RPARP-AS1	0.0331705	0.0898774	0.083	0.018	1
AP006333.1	0.0331705	0.0898774	0.083	0.018	1
NOMO2	0.0331705	0.0898774	0.083	0.018	1
AC092123.1	0.0331705	0.0898774	0.083	0.018	1
AC027097.1	0.0331705	0.0898774	0.083	0.018	1
AC024075.2	0.0331705	0.0898774	0.083	0.018	1
FBXO27	0.0331705	0.0898774	0.083	0.018	1
DSCR4	0.0331705	0.0898774	0.083	0.018	1
MAN1A1	0.0331797	0.195624	0.25	0.107	1
MEGF9	0.0332452	-0.237598	0	0.161	1
MICB	0.0333064	-0.237598	0	0.161	1
SSBP4	0.0334363	0.31969	0.667	0.552	1
THUMPD3	0.0334551	-0.353477	0.125	0.325	1
UBE2E3	0.0335239	0.342246	0.958	0.852	1
GPSM2	0.033568	-0.283793	0	0.161	1
NDUFS5	0.033688	-0.229741	1	1	1
SSUH2	0.0337527	0.0862571	0.083	0.018	1
AC090518.1	0.0337527	0.0862571	0.083	0.018	1
DIAPH2-AS1	0.0337527	0.0826458	0.083	0.018	1
SPARC	0.0338537	0.268168	0.917	0.941	1
PGAM5	0.0339281	0.212475	0.333	0.164	1
CLTC	0.0339828	0.290299	0.917	0.816	1
SLC22A17	0.0340708	0.108524	0.125	0.036	1
MAPK14	0.0340746	-0.206069	0.083	0.312	1
SLCO2A1	0.0343427	0.0790436	0.083	0.018	1
RAB4A	0.0343721	0.241285	0.667	0.435	1
CLN8	0.0344767	0.14179	0.25	0.105	1
WDHD1	0.0345071	-0.298748	0.042	0.223	1
COMMD4	0.0345329	-0.321724	0.458	0.726	1
DHRS4	0.0348154	0.311465	0.417	0.253	1
AASDH	0.0348628	-0.221865	0	0.159	1
DGCR8	0.0349298	-0.228179	0	0.159	1
POLDIP3	0.0350504	-0.266719	0.042	0.223	1
HLA-DMA	0.0350765	-0.246956	0	0.159	1
CCDC28B	0.0352206	0.256291	0.708	0.491	1
VAPB	0.0352443	0.180233	0.5	0.274	1
SLC20A2	0.0352452	0.310568	0.792	0.609	1
MGAT1	0.0354772	0.397473	0.667	0.558	1
ERLIN2	0.0355528	-0.287518	0.083	0.276	1
PDIA3	0.0356064	0.280164	1	0.98	1
SHOC2	0.0357983	0.288376	0.667	0.481	1
TRAM1	0.0358051	0.254273	0.917	0.826	1
KLHL23	0.0358263	-0.315923	0.042	0.22	1
TTC39B	0.0358906	0.237008	0.333	0.169	1
SASS6	0.036148	-0.298748	0.042	0.22	1
FAM13A	0.0361558	-0.310221	0.042	0.22	1
RAB27B	0.0363098	0.206978	0.375	0.194	1
SLC49A4	0.0364378	0.212281	0.292	0.138	1
SGTB	0.0364593	-0.287184	0.042	0.22	1
S100A16	0.0365065	0.297323	1	1	1
CLHC1	0.0366941	-0.228179	0	0.156	1
ARG2	0.0367808	0.152724	0.208	0.082	1
AKR1C3	0.036799	0.338738	0.667	0.432	1
HECTD2	0.0368208	-0.269661	0.042	0.22	1
GTF3C1	0.0369008	0.362272	0.542	0.373	1
ZSWIM5	0.0369199	-0.274672	0	0.156	1
RC3H1	0.0369551	-0.392995	0.167	0.363	1
DBF4	0.0371231	-0.33901	0.083	0.286	1
CPT1A	0.0371539	-0.254894	0.042	0.22	1
CHD1	0.0372869	-0.398104	0.292	0.486	1
GREM2	0.0374459	0.344774	0.25	0.113	1
ILK	0.0374701	0.262477	0.958	0.857	1
RSAD1	0.0376341	0.198243	0.208	0.084	1
RPE	0.0378189	0.238471	0.583	0.376	1
RIN2	0.0378243	0.304072	0.542	0.363	1
DNAJA3	0.0378803	0.192449	0.417	0.225	1
RAB11B	0.0379917	-0.343856	0.292	0.524	1
SPATA1	0.0380125	0.13993	0.167	0.059	1
KNL1	0.0382036	-0.465791	0.083	0.266	1
PHLDA3	0.0382058	0.301697	0.792	0.642	1
RIDA	0.0382291	0.258896	0.458	0.263	1
DENND5B	0.0384074	0.208439	0.542	0.317	1
BID	0.0384826	-0.329534	0.292	0.529	1
EIF2AK3	0.0385074	-0.225026	0	0.153	1
AMMECR1	0.0385408	-0.221865	0	0.153	1
RCC1	0.038591	-0.272596	0.042	0.217	1
RALGAPA2	0.0386045	-0.231326	0	0.153	1
LY6K	0.0387425	-0.25934	0	0.153	1
KCNQ5	0.0387738	0.645241	0.458	0.302	1
TBCEL	0.0387959	0.13645	0.167	0.059	1
DTL	0.0389243	-0.304855	0	0.153	1
ZDHHC20	0.0390575	0.454775	0.583	0.427	1
MRPL22	0.0391277	0.289097	0.875	0.806	1
CSNK1G1	0.0391632	0.228555	0.542	0.33	1
B3GALT6	0.0391977	0.28742	0.542	0.35	1
POC1A	0.0392386	-0.287518	0.042	0.228	1
SWI5	0.03924	0.385894	0.875	0.818	1
ORC6	0.0392559	-0.484463	0.125	0.32	1
TOMM5	0.0393994	-0.295222	1	0.982	1
ZMYND11	0.0395081	-0.328974	0.167	0.363	1
LRRC29	0.0395917	0.132978	0.167	0.059	1
ABCD1	0.0395917	0.132978	0.167	0.059	1
ETV2	0.0395917	0.129514	0.167	0.059	1
KRR1	0.0397264	-0.322413	0.292	0.529	1
ING2	0.0398711	0.303596	0.667	0.453	1
HS2ST1	0.0400755	-0.256492	0.042	0.228	1
CUL4A	0.0402413	-0.314362	0.208	0.435	1
CDK1	0.0404088	-0.657464	0.125	0.327	1
ZNF106	0.0404387	0.290113	0.875	0.696	1
EGR3	0.0404406	0.10445	0.042	0.005	1
AC091564.6	0.0404406	0.10445	0.042	0.005	1
RSBN1	0.0404407	-0.215524	0	0.151	1
RFC4	0.0405023	-0.442707	0.125	0.317	1
GSTA4	0.0405199	0.298878	0.375	0.217	1
MYBL1	0.040598	-0.281366	0.042	0.215	1
H1F0	0.0406039	0.371151	0.583	0.396	1
LINC00960	0.0406862	0.257878	0.5	0.315	1
SNRNP48	0.0407246	0.200636	0.375	0.199	1
SLC39A13	0.0409106	0.248789	0.625	0.409	1
AL450043.1	0.041027	0.051533	0.042	0.005	1
DIO1	0.041027	0.051533	0.042	0.005	1
AC096536.3	0.041027	0.051533	0.042	0.005	1
TMEM61	0.041027	0.051533	0.042	0.005	1
AC119800.1	0.041027	0.051533	0.042	0.005	1
LINC02586	0.041027	0.051533	0.042	0.005	1
MYOCOS	0.041027	0.051533	0.042	0.005	1
LHX4	0.041027	0.051533	0.042	0.005	1
LINC01348	0.041027	0.051533	0.042	0.005	1
AC144450.1	0.041027	0.051533	0.042	0.005	1
LRATD1	0.041027	0.051533	0.042	0.005	1
LINC02576	0.041027	0.051533	0.042	0.005	1
SULT1C2	0.041027	0.051533	0.042	0.005	1
PGM5P4-AS1	0.041027	0.051533	0.042	0.005	1
AC093388.1	0.041027	0.051533	0.042	0.005	1
AC053503.2	0.041027	0.051533	0.042	0.005	1
AC093843.2	0.041027	0.051533	0.042	0.005	1
KCNJ13	0.041027	0.051533	0.042	0.005	1
AC006252.1	0.041027	0.051533	0.042	0.005	1
AC083799.1	0.041027	0.051533	0.042	0.005	1
SLITRK3	0.041027	0.051533	0.042	0.005	1
AC007620.2	0.041027	0.051533	0.042	0.005	1
AC068620.1	0.041027	0.051533	0.042	0.005	1
LINC02479	0.041027	0.051533	0.042	0.005	1
LINC02355	0.041027	0.051533	0.042	0.005	1
LINC02362	0.041027	0.051533	0.042	0.005	1
LINC00461	0.041027	0.051533	0.042	0.005	1
PITX1	0.041027	0.051533	0.042	0.005	1
LTC4S	0.041027	0.051533	0.042	0.005	1
GPLD1	0.041027	0.051533	0.042	0.005	1
HIST1H2AD	0.041027	0.051533	0.042	0.005	1
HCG27	0.041027	0.051533	0.042	0.005	1
RPS10-NUDT3	0.041027	0.051533	0.042	0.005	1
CRISP2	0.041027	0.051533	0.042	0.005	1
AL139274.2	0.041027	0.051533	0.042	0.005	1
AC093627.6	0.041027	0.051533	0.042	0.005	1
KLHL7-DT	0.041027	0.051533	0.042	0.005	1
NPSR1-AS1	0.041027	0.051533	0.042	0.005	1
CAMK2B	0.041027	0.051533	0.042	0.005	1
LINC02604	0.041027	0.051533	0.042	0.005	1
FKBP6	0.041027	0.051533	0.042	0.005	1
TMEM270	0.041027	0.051533	0.042	0.005	1
FLNC-AS1	0.041027	0.051533	0.042	0.005	1
FGF20	0.041027	0.051533	0.042	0.005	1
AC091173.1	0.041027	0.051533	0.042	0.005	1
AC084082.1	0.041027	0.051533	0.042	0.005	1
XKR9	0.041027	0.051533	0.042	0.005	1
AC027373.1	0.041027	0.051533	0.042	0.005	1
LINC01609	0.041027	0.051533	0.042	0.005	1
SEMA4D	0.041027	0.051533	0.042	0.005	1
GBGT1	0.041027	0.051533	0.042	0.005	1
DBH-AS1	0.041027	0.051533	0.042	0.005	1
IL15RA	0.041027	0.051533	0.042	0.005	1
AC010996.1	0.041027	0.051533	0.042	0.005	1
KCNMA1-AS1	0.041027	0.051533	0.042	0.005	1
AL158212.2	0.041027	0.051533	0.042	0.005	1
ADAM8	0.041027	0.051533	0.042	0.005	1
IFITM10	0.041027	0.051533	0.042	0.005	1
OLFML1	0.041027	0.051533	0.042	0.005	1
AP000759.1	0.041027	0.051533	0.042	0.005	1
AP002892.1	0.041027	0.051533	0.042	0.005	1
AP001830.1	0.041027	0.051533	0.042	0.005	1
C12orf60	0.041027	0.051533	0.042	0.005	1
AC079950.1	0.041027	0.051533	0.042	0.005	1
METTL7A	0.041027	0.051533	0.042	0.005	1
NDUFA4L2	0.041027	0.051533	0.042	0.005	1
IFNG-AS1	0.041027	0.051533	0.042	0.005	1
AC127164.1	0.041027	0.051533	0.042	0.005	1
NOS1	0.041027	0.051533	0.042	0.005	1
UBE2L5	0.041027	0.051533	0.042	0.005	1
ATP7B	0.041027	0.051533	0.042	0.005	1
AL445647.1	0.041027	0.051533	0.042	0.005	1
AL359237.1	0.041027	0.051533	0.042	0.005	1
AC116158.3	0.041027	0.051533	0.042	0.005	1
AC079328.2	0.041027	0.051533	0.042	0.005	1
LINC00923	0.041027	0.051533	0.042	0.005	1
CDIP1	0.041027	0.051533	0.042	0.005	1
MYLK3	0.041027	0.051533	0.042	0.005	1
AC090617.10	0.041027	0.051533	0.042	0.005	1
FGF11	0.041027	0.051533	0.042	0.005	1
LINC02087	0.041027	0.051533	0.042	0.005	1
SLFN12L	0.041027	0.051533	0.042	0.005	1
HIGD1B	0.041027	0.051533	0.042	0.005	1
DLX4	0.041027	0.051533	0.042	0.005	1
TMEM92	0.041027	0.051533	0.042	0.005	1
AC145343.1	0.041027	0.051533	0.042	0.005	1
AC015802.4	0.041027	0.051533	0.042	0.005	1
MYOM1	0.041027	0.051533	0.042	0.005	1
AP001269.4	0.041027	0.051533	0.042	0.005	1
AP005482.3	0.041027	0.051533	0.042	0.005	1
TCF4-AS2	0.041027	0.051533	0.042	0.005	1
AC005790.1	0.041027	0.051533	0.042	0.005	1
AC020908.1	0.041027	0.051533	0.042	0.005	1
ZNF793-AS1	0.041027	0.051533	0.042	0.005	1
PPP1R14A	0.041027	0.051533	0.042	0.005	1
PRX	0.041027	0.051533	0.042	0.005	1
WFDC3	0.041027	0.051533	0.042	0.005	1
WBP2NL	0.041027	0.051533	0.042	0.005	1
CLTRN	0.041027	0.051533	0.042	0.005	1
AL139398.1	0.041027	0.051533	0.042	0.005	1
Z82195.3	0.041027	0.051533	0.042	0.005	1
KANSL1L	0.0411589	-0.218942	0.042	0.228	1
BLOC1S4	0.0411604	0.248789	0.625	0.412	1
RBM45	0.0413595	0.164769	0.25	0.11	1
NDUFS4	0.0414283	0.296768	1	0.9	1
DBR1	0.0414348	0.156123	0.208	0.084	1
GOLGA8B	0.0414348	0.156123	0.208	0.084	1
PLEC	0.0414781	0.334054	0.792	0.624	1
TTC39A	0.0416229	0.0478667	0.042	0.005	1
LINC02102	0.0416229	0.0478667	0.042	0.005	1
C5orf47	0.0416229	0.0478667	0.042	0.005	1
ERICH5	0.0416229	0.0478667	0.042	0.005	1
PGR-AS1	0.0416229	0.0442096	0.042	0.005	1
LINC02381	0.0416229	0.0478667	0.042	0.005	1
LINC02253	0.0416229	0.0478667	0.042	0.005	1
GRAMD4	0.0416229	0.0478667	0.042	0.005	1
L1CAM	0.0416229	0.0369233	0.042	0.005	1
DYNC2H1	0.0416458	-0.309163	0.125	0.317	1
DOCK10	0.0416678	-0.163762	0.333	0.57	1
ERGIC1	0.0416779	-0.327392	0.458	0.657	1
DNAH11	0.0418299	0.250277	0.292	0.146	1
DDAH2	0.0419433	0.194273	0.667	0.419	1
HNRNPM	0.0419497	0.273721	1	0.862	1
RAMP2	0.0419657	0.129156	0.208	0.082	1
CENPU	0.0419892	-0.423245	0.083	0.261	1
TAF8	0.0420157	0.236482	0.375	0.205	1
RBM24	0.0420382	0.362072	0.333	0.176	1
AHR	0.042159	-0.310221	0.042	0.212	1
FRMD6	0.0422243	0.442086	0.917	0.821	1
AC018742.1	0.0422249	0.0369233	0.042	0.005	1
CMTM4	0.0422252	0.224966	0.292	0.138	1
ALDH18A1	0.0422435	0.246831	0.417	0.235	1
PTK7	0.0423715	-0.300667	0.167	0.376	1
FBXO22	0.0424896	0.271175	0.667	0.529	1
EMC4	0.0424989	-0.340463	0.5	0.688	1
WDR53	0.0424989	-0.218698	0	0.148	1
SNAPC4	0.042532	-0.225026	0	0.148	1
YWHAQ	0.0426596	0.276713	0.958	0.913	1
DHX8	0.042735	-0.311807	0.125	0.315	1
CCBE1	0.0427541	0.461054	0.833	0.66	1
BOLA3	0.0427745	-0.349999	0.792	0.872	1
BDH2	0.0428572	0.24096	0.542	0.332	1
GLT8D2	0.0430002	0.198243	0.208	0.087	1
CYTH2	0.0430096	0.248128	0.625	0.422	1
ELAC2	0.0430316	-0.251922	0.042	0.212	1
PDGFB	0.043037	0.18014	0.167	0.061	1
TRMT61B	0.0431953	-0.251922	0.042	0.212	1
ARL6IP4	0.0432293	0.217556	1	0.995	1
ADRA1D	0.0432654	0.145951	0.208	0.084	1
FAM126A	0.0434531	0.292503	0.667	0.494	1
SAMD4B	0.0434736	-0.290306	0.083	0.266	1
OXSR1	0.0436275	0.462589	0.625	0.537	1
FAHD2B	0.0436351	0.115614	0.125	0.038	1
UBE2S	0.0440147	-0.429439	0.917	0.995	1
SFRP1	0.0442278	-0.34689	0.042	0.21	1
RPUSD1	0.0442973	0.188713	0.375	0.197	1
FYB1	0.0444046	0.494049	0.667	0.532	1
GXYLT2	0.0444289	0.112065	0.125	0.038	1
PAG1	0.0444289	0.112065	0.125	0.038	1
RBM48	0.0445474	-0.205959	0	0.146	1
DECR2	0.0445606	0.322626	0.333	0.184	1
CENPK	0.044565	-0.512184	0.25	0.442	1
E2F6	0.0445832	-0.209154	0	0.146	1
HEXIM2	0.0446178	-0.215524	0	0.146	1
SNX16	0.0446509	-0.218698	0	0.146	1
ANKRD54	0.0446509	-0.218698	0	0.146	1
HOXB2	0.0447509	0.383068	0.75	0.632	1
CENPO	0.0447985	-0.253161	0	0.146	1
PRDX2	0.0448153	-0.263334	0.958	0.982	1
RPSA	0.0448224	0.133316	1	1	1
SLC35E4	0.044893	-0.269661	0.042	0.21	1
ZFHX3	0.0449847	0.201634	0.583	0.345	1
DUSP14	0.0450005	0.29385	0.833	0.716	1
PPIG	0.0452361	-0.367716	0.583	0.693	1
RRP7A	0.0452635	-0.319198	0.5	0.706	1
NUP37	0.0452939	-0.339958	0.208	0.394	1
LACTB	0.0453044	-0.304229	0.417	0.655	1
RARS	0.0453356	-0.317892	0.375	0.596	1
MPV17	0.0454078	-0.328427	0.625	0.721	1
URB1-AS1	0.0454721	0.232066	0.208	0.09	1
LINC00470	0.0456228	0.166737	0.458	0.253	1
SMIM29	0.0457218	-0.382743	0.208	0.391	1
SMS	0.0457885	0.191751	0.958	0.985	1
PARP4	0.0458039	0.2735	0.583	0.391	1
MCM9	0.0462335	0.234899	0.25	0.118	1
CAMTA1	0.0464147	0.234331	1	0.969	1
ACADS	0.0464217	0.13645	0.167	0.061	1
GLRX2	0.0464341	0.251374	0.875	0.688	1
MICOS10	0.0465443	0.192913	1	1	1
DDX19B	0.0466335	0.262297	0.375	0.215	1
ECI1	0.046706	-0.352449	0.375	0.552	1
MROH1	0.0467646	-0.202756	0	0.143	1
PLEKHO2	0.0468356	-0.212342	0	0.143	1
HOXD3	0.0468689	-0.215524	0	0.143	1
RRP36	0.047039	0.270481	0.917	0.785	1
LINC02657	0.0470563	0.316772	0.625	0.422	1
FAM104B	0.0472727	-0.298535	0.125	0.312	1
SERTAD1	0.0473264	0.332575	0.708	0.588	1
AC093323.1	0.0473338	0.129514	0.167	0.061	1
SRP54	0.047789	0.338825	0.833	0.701	1
AC018978.1	0.0479601	0.175639	0.333	0.166	1
SMAD5	0.0481375	-0.286588	0.292	0.563	1
DSP	0.0481813	0.251215	0.917	0.765	1
TRIM27	0.0482422	-0.288116	0.167	0.358	1
SEC61A2	0.0482594	0.129514	0.167	0.061	1
ZBTB22	0.0482594	0.126058	0.167	0.061	1
ARL4A	0.0487054	-0.286821	0.167	0.399	1
AP3B2	0.0487993	0.140705	0.083	0.02	1
USP51	0.0487993	0.140705	0.083	0.02	1
ANAPC5	0.0489174	-0.34848	0.375	0.56	1
G2E3	0.0489743	-0.433369	0.25	0.417	1
SLC16A4	0.0491121	0.221741	0.333	0.174	1
MIA3	0.0491269	0.300922	0.583	0.455	1
CD99L2	0.0491899	-0.209154	0	0.141	1
SENP1	0.0491932	0.203178	0.333	0.174	1
LSM6	0.0492306	-0.328166	0.708	0.78	1
MPP4	0.0493366	-0.231326	0	0.141	1
DEPDC1B	0.0493848	-0.237598	0	0.141	1
DLGAP5	0.0494632	-0.247563	0.125	0.361	1
MORF4L2	0.049472	0.289881	1	0.954	1
ACER3	0.0495195	0.258508	0.542	0.338	1
DLGAP1-AS2	0.049565	0.137094	0.083	0.02	1
C1orf54	0.0496058	0.259039	0.708	0.558	1
PPIC	0.0496896	0.354477	0.958	0.867	1
RCAN3	0.0497471	0.191122	0.375	0.199	1
UTP18	0.04975	0.225594	0.625	0.425	1
RYK	0.0498682	-0.269042	0.333	0.55	1
WDR5	0.0499129	-0.251922	0.042	0.205	1
SMPD1	0.0499196	-0.277718	0.125	0.322	1
STAT1	0.0499439	-0.33149	0.292	0.494	1
SLC44A1	0.0500561	-0.311807	0.125	0.307	1
SPPL2A	0.0500562	0.228846	0.75	0.537	1
SCNM1	0.0500889	0.196262	0.583	0.371	1
MAD2L1	0.0501246	-0.588648	0.25	0.44	1
IRS1	0.050309	-0.358602	0.125	0.304	1
EVC	0.0505096	0.338006	0.292	0.151	1
STK3	0.0505167	0.312733	0.667	0.581	1
TBC1D9B	0.050524	0.216067	0.5	0.299	1
VKORC1	0.0506712	0.193347	0.958	0.98	1
GNAQ	0.0508734	-0.448717	0.417	0.527	1
AK6	0.0508814	-0.338879	0.458	0.632	1
MFAP1	0.0508933	0.36099	0.667	0.504	1
TENT4A	0.050942	0.164975	0.333	0.169	1
TJP1	0.0513831	0.368199	0.917	0.742	1
RAD51B	0.0514476	-0.321401	0.125	0.317	1
MME	0.0514683	0.232513	0.542	0.33	1
RUFY3	0.0514848	-0.243743	0.167	0.386	1
PUS3	0.0515144	-0.19633	0	0.138	1
FSD1L	0.0516524	-0.215524	0	0.138	1
TSPAN9	0.0517701	-0.306921	0.083	0.256	1
SLC3A2	0.0517804	0.00432877	0.833	0.685	1
KLF11	0.0518967	0.0862571	0.083	0.02	1
CNNM3	0.0518967	0.0862571	0.083	0.02	1
AL590550.1	0.0518967	0.0862571	0.083	0.02	1
LINC01504	0.0518967	0.0862571	0.083	0.02	1
CAVIN4	0.0518967	0.0862571	0.083	0.02	1
AGAP4	0.0518967	0.0862571	0.083	0.02	1
AC107308.1	0.0518967	0.0862571	0.083	0.02	1
SIGLEC15	0.0518967	0.0862571	0.083	0.02	1
AC110597.1	0.0518967	0.0862571	0.083	0.02	1
TMEM35A	0.0518967	0.0862571	0.083	0.02	1
IDH3A	0.0519241	0.200329	0.542	0.34	1
TP53INP2	0.0521155	0.18476	0.208	0.09	1
CDT1	0.0521844	-0.336893	0.083	0.253	1
FGFR1OP2	0.0521958	0.235726	0.875	0.691	1
SFSWAP	0.052217	-0.20035	0.167	0.386	1
NFKBIB	0.0523405	0.253473	0.375	0.215	1
ALDOC	0.0524516	0.160992	0.125	0.041	1
LYPD6	0.0525723	0.183712	0.292	0.143	1
GPR156	0.0527042	0.0826458	0.083	0.02	1
AC024560.5	0.0527042	0.0826458	0.083	0.02	1
LINC02196	0.0527042	0.0826458	0.083	0.02	1
PRR15	0.0527042	0.0826458	0.083	0.02	1
LMF1	0.0527042	0.0826458	0.083	0.02	1
GPR4	0.0527042	0.0826458	0.083	0.02	1
SNAI1	0.0527042	0.0826458	0.083	0.02	1
KCNJ6	0.0527042	0.0826458	0.083	0.02	1
DCUN1D4	0.0527147	0.279636	0.417	0.261	1
AL022068.1	0.0527463	0.173237	0.167	0.064	1
KLF3	0.0528401	0.4411	0.417	0.253	1
MAFG-DT	0.0530957	0.105497	0.167	0.061	1
MKI67	0.0531397	-0.721172	0.167	0.358	1
GNAI2	0.0531482	0.157189	1	0.997	1
SCAF4	0.0531752	-0.221865	0.042	0.202	1
SRR	0.0534642	-0.216431	0.083	0.284	1
DAPK2	0.0535207	0.0790436	0.083	0.02	1
PTGER1	0.0535207	0.0790436	0.083	0.02	1
LRFN5	0.0536091	0.637242	0.375	0.22	1
KIF1BP	0.0537305	0.260127	0.75	0.555	1
CASP3	0.0537833	0.317717	0.458	0.307	1
RBM4	0.0538567	0.3598	0.75	0.657	1
AP001816.1	0.0540932	-0.19633	0	0.136	1
LCLAT1	0.054162	-0.202756	0	0.136	1
LINC01829	0.0541624	-0.205959	0	0.136	1
SPATS2	0.0542032	0.29884	0.917	0.762	1
TSC22D1	0.0542541	0.305158	0.792	0.588	1
CCNF	0.0544024	-0.253161	0	0.136	1
SNRNP70	0.0546641	0.250416	0.833	0.703	1
RNF6	0.0546956	-0.241418	0.083	0.269	1
P3H4	0.0547711	0.262297	0.667	0.478	1
PDXP	0.0548823	-0.248945	0.042	0.199	1
EVA1C	0.054883	-0.298638	0.083	0.253	1
RALY	0.0548985	0.223399	0.875	0.703	1
MICALL2	0.0549658	-0.195339	0.042	0.212	1
TYW5	0.0550584	0.189096	0.25	0.118	1
CCDC127	0.0552782	0.243323	0.458	0.276	1
ESCO2	0.0553155	-0.358306	0.042	0.205	1
WARS2	0.0553416	-0.233963	0.042	0.199	1
TADA2A	0.0554545	-0.239975	0.042	0.199	1
COX19	0.0556608	0.198243	0.542	0.332	1
NFASC	0.0559033	0.132978	0.167	0.064	1
IL7R	0.0559354	-0.301625	0.042	0.197	1
ADGRB2	0.0563744	0.112065	0.125	0.041	1
PPP1R3B	0.0563744	0.112065	0.125	0.041	1
ZNF510	0.0563744	0.112065	0.125	0.041	1
PPFIA3	0.0563744	0.112065	0.125	0.041	1
CENPM	0.0564408	-0.440378	0.167	0.332	1
PRKAB2	0.0566576	0.179359	0.25	0.118	1
ZNF131	0.0567335	-0.32679	0.25	0.425	1
NET1	0.0567376	0.305216	0.667	0.483	1
TIAL1	0.0567682	0.233504	0.792	0.581	1
AC073114.1	0.056816	0.191486	0.167	0.064	1
BRPF3	0.0568232	-0.202756	0	0.133	1
GKAP1	0.0568232	-0.209154	0	0.133	1
ZNF318	0.0568958	0.237566	0.292	0.153	1
PCBP2	0.05694	-0.285787	0.958	0.926	1
RNF187	0.0570179	0.373986	0.667	0.524	1
COMMD3	0.0570394	0.199295	0.833	0.624	1
AIP	0.0571536	0.269147	0.833	0.798	1
ANKDD1A	0.0572129	0.145951	0.208	0.09	1
LINC01578	0.0572595	-0.305581	0.333	0.55	1
AKT1	0.0572975	0.195475	0.667	0.44	1
DUSP1	0.057493	0.327738	0.917	0.714	1
FERMT1	0.0575157	-0.274333	0.083	0.263	1
FADS1	0.0575906	0.229261	0.625	0.486	1
TBC1D2	0.0578386	0.365631	0.458	0.32	1
AC018647.2	0.0580147	0.126058	0.167	0.064	1
ATP2B1-AS1	0.0580147	0.126058	0.167	0.064	1
CYTH3	0.0580774	-0.180389	0.042	0.21	1
TEAD3	0.0581413	-0.230948	0.042	0.197	1
GNL2	0.0581634	0.242082	0.5	0.322	1
ZNF20	0.058304	0.104993	0.125	0.041	1
SIAH2	0.0583745	0.303596	0.292	0.151	1
SERPINI1	0.058455	0.188119	0.208	0.092	1
GLIPR2	0.0586027	0.257654	0.792	0.591	1
MICU2	0.0587599	-0.33851	0.5	0.685	1
FNDC4	0.0589681	0.162854	0.5	0.294	1
PRDM2	0.0590668	0.156423	0.417	0.235	1
RIT1	0.0590685	0.256675	0.542	0.391	1
SLC9A9	0.0590923	0.122611	0.167	0.064	1
DOT1L	0.0592435	0.193939	0.333	0.179	1
DIS3L2	0.0592946	0.278042	0.417	0.253	1
BMP2K	0.0593754	-0.235858	0.083	0.263	1
FAN1	0.0594218	-0.180138	0	0.13	1
C1orf56	0.0594623	-0.183391	0	0.13	1
SENCR	0.0595518	0.139209	0.208	0.09	1
PRKAA1	0.0595849	-0.251391	0.125	0.315	1
ANTKMT	0.0596278	0.281901	0.958	0.78	1
TEDC2	0.0596704	-0.205959	0	0.13	1
ZWILCH	0.0597451	-0.284278	0.042	0.194	1
BLMH	0.0598972	0.144208	0.292	0.143	1
DTNBP1	0.0605166	0.186679	0.417	0.24	1
CAD	0.0605526	-0.242971	0.042	0.194	1
RPL13A	0.0605865	-0.203984	1	1	1
HEBP2	0.0606034	-0.326727	0.917	0.88	1
CCN1	0.0606845	0.310313	1	0.972	1
ILVBL	0.0607906	-0.127184	0.083	0.281	1
H1FX	0.0608507	0.272828	0.875	0.798	1
DGKH	0.0610265	0.260979	0.542	0.394	1
PSMB8	0.0610477	0.249256	0.917	0.78	1
PNPLA2	0.0610757	-0.288384	0.167	0.355	1
POP1	0.061199	-0.233963	0.042	0.194	1
KIF14	0.0612133	-0.33851	0.042	0.192	1
TOMM34	0.0613476	-0.246956	0.083	0.261	1
PSMB1	0.061546	0.172904	1	1	1
LGALS3BP	0.0618452	0.357684	0.667	0.506	1
NOL12	0.0618459	0.271175	0.5	0.315	1
CELF1	0.0618664	-0.39748	0.458	0.575	1
KIRREL3	0.0619152	0.259467	0.833	0.673	1
KIF15	0.0621294	-0.304496	0.042	0.192	1
FAM168B	0.0623313	-0.277718	0.125	0.309	1
SLC48A1	0.0623351	-0.176878	0	0.128	1
VCPKMT	0.0623757	-0.180138	0	0.128	1
ZNF281	0.0624561	0.305585	0.5	0.317	1
R3HDM2	0.062485	0.398214	0.667	0.517	1
PHC3	0.0625092	-0.277718	0.167	0.345	1
CXCL1	0.0625963	-0.413507	0.292	0.527	1
FLNA	0.0626688	0.278715	0.958	0.944	1
SUN2	0.0626859	-0.256492	0.083	0.248	1
PCLAF	0.0626951	-0.425698	0.417	0.634	1
TRAM2	0.0629828	0.214507	0.667	0.478	1
AC005280.2	0.0630012	0.269452	0.167	0.069	1
H3F3A	0.0630501	-0.198539	1	1	1
CAP1	0.0631245	0.327165	0.958	0.964	1
CERCAM	0.0631692	-0.300103	0.292	0.499	1
USP40	0.0633014	-0.245961	0.042	0.192	1
HELLS	0.0633491	-0.383813	0.208	0.422	1
MCAT	0.0635865	-0.239975	0.042	0.192	1
TMEM39B	0.0635952	-0.221865	0.083	0.261	1
BNIP2	0.0637519	0.250416	0.625	0.425	1
PTPN13	0.0638696	-0.287518	0.083	0.246	1
GTSE1	0.0640127	-0.601211	0.125	0.284	1
LSR	0.0640461	-0.293192	0.125	0.294	1
NDUFAF2	0.0640633	0.203885	0.875	0.811	1
ERVMER61-1	0.0641637	-0.267245	0.083	0.258	1
MYOSLID	0.0641947	0.182597	0.25	0.12	1
LMTK2	0.064323	0.14179	0.25	0.118	1
CRYZL1	0.0643303	0.275291	0.458	0.281	1
SLC25A32	0.0644558	-0.282445	0.125	0.294	1
KLF13	0.0645646	0.133818	0.375	0.199	1
SMARCA1	0.0646219	0.304638	0.708	0.614	1
CHFR	0.0646645	-0.215778	0.042	0.192	1
USP36	0.0647498	0.255544	0.292	0.153	1
PLD1	0.0647603	0.165158	0.333	0.176	1
STK10	0.064973	0.230533	0.375	0.212	1
ASL	0.0650556	0.224904	0.708	0.537	1
MAN2B1	0.0650704	0.181713	0.333	0.179	1
TMPO	0.0651088	-0.547483	0.333	0.481	1
MIGA1	0.0653037	-0.260709	0.125	0.297	1
RPUSD4	0.0653839	-0.17361	0	0.125	1
DHX35	0.065458	0.188119	0.208	0.095	1
LRIG1	0.0655366	-0.189875	0	0.125	1
ADAMTS3	0.0656031	-0.202756	0	0.125	1
DAP	0.0656866	0.206533	0.792	0.609	1
CENPX	0.0658626	-0.295017	0.875	0.926	1
XRRA1	0.0659752	0.281901	0.458	0.299	1
CDC25B	0.0660066	-0.266719	0.042	0.189	1
GPRIN3	0.0660131	0.15746	0.125	0.043	1
PPM1A	0.0660441	0.187813	0.333	0.182	1
SOCS5	0.0662674	0.226975	0.667	0.455	1
PPIE	0.0662693	0.208013	0.708	0.506	1
TOMM7	0.0663556	0.273268	1	1	1
MPDU1	0.066453	-0.284184	0.208	0.407	1
PER2	0.0664777	0.129514	0.167	0.066	1
TMEM129	0.0664777	0.129514	0.167	0.066	1
AP001528.1	0.0664777	0.129514	0.167	0.066	1
VEZT	0.0665122	0.278161	0.583	0.414	1
MASTL	0.0666162	-0.248945	0.042	0.189	1
RAD51C	0.0666653	-0.336174	0.25	0.414	1
CLSTN1	0.0667293	0.344238	0.708	0.575	1
RELCH	0.0668524	0.159814	0.458	0.269	1
FKBP15	0.0669463	-0.210572	0.083	0.258	1
APBB1IP	0.0670109	0.314783	0.625	0.473	1
C6orf141	0.0670346	0.139209	0.208	0.092	1
PPP4R1	0.067324	-0.301009	0.167	0.335	1
TAF15	0.0673635	-0.281683	0.417	0.632	1
KLRD1	0.0674299	0.150423	0.125	0.043	1
EIF4A1	0.0674868	0.180012	1	0.997	1
ATF7	0.0676097	-0.313173	0.208	0.379	1
LINC00839	0.0679961	0.227321	0.375	0.223	1
MRPS18A	0.0680144	-0.278935	0.208	0.396	1
EIF4A2	0.0681409	-0.290083	0.542	0.747	1
SHROOM1	0.068428	0.222035	0.208	0.097	1
PHF12	0.0684499	0.186859	0.292	0.153	1
ALDH2	0.0686057	0.30117	0.333	0.189	1
BRD3OS	0.0686153	-0.17361	0	0.123	1
OCIAD1	0.068646	-0.297153	0.75	0.818	1
ZNF710	0.0686545	-0.183391	0	0.123	1
B9D1	0.0687066	-0.232672	0.125	0.307	1
CASC15	0.0687612	-0.189875	0	0.123	1
COG8	0.0687615	-0.193106	0	0.123	1
AP2S1	0.0687735	-0.153499	1	1	1
CDCA5	0.068779	-0.269661	0.042	0.187	1
TIGD2	0.0688756	0.122611	0.167	0.066	1
BRWD3	0.0689136	0.310703	0.333	0.192	1
ZNF639	0.0689778	0.187813	0.333	0.184	1
RPP25L	0.0692907	0.307669	0.5	0.33	1
CHSY1	0.0693081	0.175206	0.417	0.24	1
KHDRBS3	0.0693988	0.340496	0.458	0.327	1
AC005323.2	0.0694598	0.232701	0.417	0.24	1
RBMX2	0.0695814	-0.288116	0.167	0.335	1
ATAD5	0.069605	-0.251922	0.042	0.187	1
FGF5	0.0696469	0.414868	0.833	0.76	1
PIGS	0.0696591	0.144858	0.417	0.235	1
CPTP	0.0697248	0.239466	0.333	0.192	1
POLR3A	0.0698185	-0.282445	0.125	0.292	1
MMP14	0.070004	0.213294	0.458	0.289	1
SUCNR1	0.0700567	0.267617	0.083	0.023	1
DLEU2	0.070081	-0.481732	0.292	0.442	1
ZNF280D	0.0701612	0.188857	0.583	0.371	1
ZW10	0.0702418	-0.236972	0.042	0.187	1
HNRNPH2	0.0703486	0.363905	0.542	0.402	1
ITGB3BP	0.0704585	-0.274061	0.167	0.361	1
FAM160A1	0.070529	0.137094	0.083	0.023	1
TESMIN	0.070529	0.137094	0.083	0.023	1
AC048341.2	0.070529	0.137094	0.083	0.023	1
RBM15B	0.0705514	-0.233963	0.042	0.187	1
TIMM44	0.07061	0.172352	0.417	0.243	1
LDLRAP1	0.0706241	0.14505	0.25	0.12	1
JMJD6	0.0707454	-0.224313	0.167	0.368	1
PEX26	0.0708537	-0.233963	0.042	0.187	1
FEZ1	0.0708772	0.197646	0.333	0.187	1
ZFP36L2	0.0709507	0.30865	0.375	0.248	1
AC139149.1	0.071004	0.108524	0.125	0.043	1
BBS2	0.0710055	0.173237	0.167	0.069	1
TMUB1	0.0711069	0.394195	0.667	0.54	1
SAE1	0.0712498	-0.31774	0.333	0.542	1
AC156455.1	0.0713003	-0.26502	0.083	0.24	1
TUBB2A	0.0713073	0.32051	0.708	0.588	1
MRPL30	0.0714398	-0.206598	0.042	0.187	1
ITGB4	0.0715212	0.133491	0.083	0.023	1
AL121832.2	0.0715212	0.133491	0.083	0.023	1
ZNF75D	0.0716329	0.218707	0.167	0.069	1
MTBP	0.0719134	-0.167052	0	0.12	1
AC005476.2	0.0719134	-0.167052	0	0.12	1
SFT2D3	0.0719544	-0.176878	0	0.12	1
BCL7A	0.0719926	0.312233	0.208	0.102	1
TMEFF1	0.0720307	-0.176878	0	0.12	1
SNX18	0.0720309	-0.180138	0	0.12	1
MRPL13	0.0720779	-0.329418	0.625	0.757	1
AC025419.1	0.072133	-0.202756	0	0.12	1
PICK1	0.0721331	-0.202756	0	0.12	1
XAGE2	0.0721361	0.104993	0.125	0.043	1
STS	0.0722262	-0.247913	0.083	0.24	1
SAMD9	0.0722267	0.223099	0.667	0.455	1
JAZF1	0.072366	0.357414	0.625	0.545	1
UBA52	0.072409	-0.16936	1	1	1
FBXO32	0.0725823	0.395776	0.458	0.286	1
FAHD2A	0.0727868	0.262763	0.417	0.274	1
SQOR	0.0729257	0.272479	0.5	0.322	1
MEIS2	0.0729273	-0.361454	0.417	0.629	1
NMD3	0.0730746	0.193857	0.458	0.284	1
PPP1R2	0.0731835	0.214672	0.75	0.532	1
SPA17	0.073256	0.233091	0.375	0.228	1
GLO1	0.0732684	0.222035	0.792	0.637	1
DPP3	0.0735504	0.298142	0.333	0.199	1
FKBP14	0.0736219	0.291353	0.625	0.432	1
SNTB2	0.0736616	-0.244882	0.333	0.545	1
FANCG	0.0737189	-0.224899	0.042	0.184	1
ATAD2	0.073743	-0.579868	0.375	0.504	1
MIR31HG	0.0737448	0.443531	1	0.859	1
XPC	0.0738001	-0.290882	0.167	0.345	1
ZFAND5	0.0738177	0.29512	0.667	0.535	1
CBFB	0.0738922	-0.198106	0.125	0.32	1
SEMA7A	0.0739118	0.271175	0.375	0.238	1
NFX1	0.0739847	-0.229438	0.167	0.35	1
NR3C1	0.0741044	-0.307296	0.417	0.65	1
SERGEF	0.0741564	-0.252473	0.125	0.289	1
IPO5	0.0741662	-0.335004	0.417	0.596	1
DKK1	0.0741703	0.241944	1	0.957	1
DLX2	0.0743119	-0.260709	0.083	0.248	1
COQ3	0.0743705	-0.212725	0.042	0.184	1
GALT	0.0743705	-0.212725	0.042	0.184	1
IFI30	0.0743728	-0.221865	0.042	0.184	1
ZNF548	0.0744389	0.0979552	0.125	0.043	1
ABCB1	0.0744392	0.0944493	0.125	0.043	1
SAFB2	0.0744908	-0.282445	0.125	0.286	1
MSI2	0.0745571	-0.225476	0.375	0.56	1
ATXN7L3B	0.0747257	-0.293743	0.292	0.494	1
SAP30	0.0749525	-0.364037	0.292	0.437	1
PNMA1	0.0749719	0.18476	0.333	0.187	1
CHMP5	0.0750266	0.239075	0.958	0.934	1
PFN4	0.075044	0.0826458	0.083	0.023	1
AC110611.2	0.075044	0.0826458	0.083	0.023	1
FRS3	0.075044	0.0826458	0.083	0.023	1
NOS3	0.075044	0.0826458	0.083	0.023	1
LINC01503	0.075044	0.0826458	0.083	0.023	1
ZNF774	0.075044	0.0826458	0.083	0.023	1
AC092338.3	0.075044	0.0826458	0.083	0.023	1
DHRS13	0.075044	0.0826458	0.083	0.023	1
KCNJ2-AS1	0.075044	0.0826458	0.083	0.023	1
AMH	0.075044	0.0826458	0.083	0.023	1
AC008649.2	0.075044	0.0826458	0.083	0.023	1
GRIK1	0.075044	0.0826458	0.083	0.023	1
FO393418.1	0.075044	0.0826458	0.083	0.023	1
PEF1	0.0750501	0.20937	0.625	0.432	1
CCNG1	0.0751719	-0.33851	0.25	0.407	1
RBM19	0.0753858	0.212658	0.333	0.192	1
TNS2	0.0754079	-0.163762	0	0.118	1
LIMD1	0.0754879	-0.170335	0	0.118	1
CXorf40B	0.0754879	-0.170335	0	0.118	1
RNF17	0.075543	-0.263772	0.042	0.182	1
ADAM17	0.0755606	0.187559	0.417	0.24	1
ZNF701	0.0755608	-0.180138	0	0.118	1
RCL1	0.0755948	-0.186637	0	0.118	1
PCAT19	0.0757633	-0.243844	0	0.118	1
AC004784.1	0.0759777	-0.334419	0	0.118	1
ORAI2	0.0760031	-0.233324	0.208	0.422	1
FNBP1L	0.076017	0.259493	0.5	0.338	1
LINC02798	0.0760895	0.0754503	0.083	0.023	1
AC041005.1	0.0760895	0.0790436	0.083	0.023	1
CCL7	0.0760895	0.0754503	0.083	0.023	1
DSC2	0.0760895	0.0790436	0.083	0.023	1
AL022162.1	0.0760895	0.0754503	0.083	0.023	1
2023-03-03	0.076092	-0.344775	0.208	0.366	1
ATP6V1E1	0.0761933	0.246246	0.875	0.734	1
RAN	0.0763816	-0.243735	1	1	1
CDCA2	0.0764367	-0.397619	0.083	0.23	1
CCSER2	0.0766429	0.419405	0.583	0.437	1
HERC2	0.0766946	-0.326148	0.292	0.468	1
MEIS3	0.0767465	0.364097	0.333	0.199	1
USP37	0.0767735	0.198243	0.375	0.212	1
SGO1-AS1	0.0767951	0.0770462	0.125	0.043	1
HGS	0.0768899	-0.3126	0.25	0.409	1
MAPKAPK2	0.0772587	0.189181	0.5	0.315	1
ICE2	0.0773011	0.251463	0.333	0.199	1
SLC9A7	0.0774983	0.16959	0.333	0.184	1
ZNF581	0.0776963	0.209643	0.333	0.189	1
YIPF2	0.077768	0.253473	0.625	0.468	1
AC006001.2	0.0778003	-0.279123	0.083	0.235	1
RXYLT1	0.0778649	-0.318081	0.208	0.368	1
BCAS2	0.077871	-0.345685	0.417	0.568	1
TFE3	0.0780522	-0.212725	0.042	0.182	1
USP15	0.0780525	-0.286588	0.417	0.593	1
MED20	0.0781551	0.126058	0.167	0.069	1
PBX3	0.0781658	-0.330538	0.333	0.529	1
CDK11A	0.0782132	0.253473	0.375	0.215	1
BEX3	0.0782185	0.209835	1	1	1
TBP	0.0782201	-0.209665	0.042	0.182	1
RGS10	0.0783695	0.333112	0.958	0.887	1
FBXL13	0.0783868	-0.209665	0.042	0.182	1
SPANXB1	0.0783906	0.281104	0.458	0.292	1
BCL9L	0.0784799	-0.262183	0.083	0.235	1
MGRN1	0.078551	-0.203526	0.042	0.182	1
KHDRBS1	0.0787022	-0.310414	0.875	0.895	1
BRD8	0.0788133	-0.300367	0.25	0.422	1
SUPT3H	0.0788753	-0.33149	0.25	0.437	1
RNF34	0.0789074	-0.216958	0.208	0.394	1
USF3	0.0790033	0.141055	0.292	0.151	1
ZNF740	0.0790651	-0.160465	0	0.115	1
LRRFIP1	0.0791121	0.252146	0.958	0.88	1
TTC31	0.0791451	-0.167052	0	0.115	1
RAB40C	0.0791451	-0.167052	0	0.115	1
MAPK7	0.0791451	-0.167052	0	0.115	1
FAM118A	0.0791825	-0.17361	0	0.115	1
FBXO5	0.079245	-0.458031	0.125	0.284	1
CPSF1	0.0795652	0.176128	0.25	0.125	1
NSUN3	0.0800032	0.193172	0.292	0.159	1
SHROOM3	0.0800082	0.212074	0.208	0.097	1
VPS33A	0.0800987	-0.159194	0.042	0.192	1
TBK1	0.080165	0.280923	0.5	0.373	1
POLR3H	0.0803462	-0.277718	0.167	0.33	1
MFSD14C	0.0805295	-0.227694	0.083	0.235	1
CCDC117	0.080533	-0.2335	0.083	0.235	1
FABP4	0.0805898	-0.355647	0.083	0.23	1
ITGBL1	0.0807742	-0.538722	0.417	0.547	1
COTL1	0.0807878	0.198724	1	0.982	1
TMEM126B	0.0812231	0.335747	0.625	0.552	1
C11orf54	0.0813426	0.201634	0.417	0.261	1
FANCB	0.0813609	-0.230948	0.042	0.179	1
DRG2	0.0816165	-0.277718	0.167	0.33	1
PPWD1	0.0817202	-0.209665	0.042	0.179	1
HIST1H3B	0.0818756	-0.315923	0.042	0.176	1
SPOUT1	0.0819002	-0.206598	0.042	0.179	1
GAS5	0.0819416	-0.406444	0.708	0.829	1
ALKBH6	0.0820542	0.135291	0.25	0.123	1
PRDM5	0.0820793	-0.206598	0.042	0.179	1
LIG4	0.0820793	-0.206598	0.042	0.179	1
GTF2H3	0.0822144	-0.216958	0.208	0.407	1
HK2	0.0822226	0.115741	0.167	0.069	1
BX470102.2	0.0822484	0.238885	0.375	0.238	1
KANSL3	0.0822556	-0.203526	0.042	0.179	1
RIC8A	0.0822859	-0.270854	0.25	0.422	1
FHL2	0.0823271	-0.344517	0.917	0.969	1
KIZ	0.0824301	-0.200446	0.042	0.179	1
KYAT3	0.0824887	0.290996	0.375	0.251	1
COIL	0.0825865	-0.24419	0.125	0.284	1
WASHC2A	0.0826026	-0.194268	0.042	0.179	1
MAP3K12	0.0828929	-0.15716	0	0.113	1
SESN1	0.0829604	0.240734	0.25	0.133	1
PITPNM1	0.0829729	-0.167052	0	0.113	1
HNRNPUL1	0.0830256	-0.236555	0.292	0.519	1
BUB1	0.0830567	-0.328974	0.083	0.24	1
EML2	0.0831193	0.244703	0.542	0.384	1
CCDC57	0.083169	-0.165282	0.042	0.189	1
NIPSNAP1	0.0831918	0.145403	0.5	0.304	1
ADD1	0.0832355	-0.279123	0.375	0.578	1
POSTN	0.0832446	-0.231326	0	0.113	1
AC073611.1	0.0832745	-0.19867	0.208	0.407	1
HDHD3	0.0833433	0.288067	0.292	0.174	1
MT-ND2	0.0833783	-0.348175	1	0.995	1
HIST1H2AH	0.0834026	-0.289842	0	0.113	1
ANKRD35	0.0834434	0.222035	0.208	0.102	1
IER5L	0.0834614	-0.391423	0.417	0.642	1
RBIS	0.0834925	0.268035	0.917	0.834	1
SP1	0.0837048	0.183712	0.292	0.159	1
ZNF83	0.0837263	-0.288868	0.208	0.391	1
CKAP2L	0.0838903	-0.311241	0.083	0.24	1
TMEM263	0.0839318	0.191285	0.875	0.724	1
DCP1A	0.0844758	0.148863	0.458	0.276	1
INTS6	0.0845572	0.223295	0.542	0.384	1
SMYD2	0.0845816	0.166661	0.417	0.253	1
TENM2	0.0846134	0.331634	0.25	0.13	1
GANAB	0.0846736	-0.282154	0.417	0.568	1
RPP25	0.0847787	-0.285139	0.125	0.279	1
C8orf82	0.0849571	0.251622	0.417	0.266	1
PRKG1	0.0850911	0.318243	0.625	0.504	1
SS18L2	0.0850956	0.26895	0.583	0.45	1
SEPTIN10	0.0853249	0.246246	0.833	0.701	1
PCNA	0.0854511	-0.406536	0.333	0.491	1
ZDHHC21	0.0855455	-0.256492	0.083	0.23	1
TMEM99	0.0855595	-0.269871	0.167	0.327	1
EMP3	0.0855984	0.180791	1	0.997	1
THAP7	0.0858535	-0.241973	0.167	0.353	1
POLR2A	0.0858846	-0.340463	0.458	0.657	1
MAD2L1BP	0.0859272	-0.212725	0.042	0.176	1
BBS1	0.0859416	0.14179	0.25	0.125	1
NDUFA13	0.0860351	0.195803	1	0.997	1
RASSF3	0.0863009	-0.19736	0.042	0.176	1
NAV3	0.0864474	0.521307	0.833	0.696	1
METTL5	0.08662	0.248627	1	0.831	1
ATG16L1	0.0868993	-0.153847	0	0.11	1
FCHSD1	0.0868993	-0.153847	0	0.11	1
VPS52	0.0868993	-0.15716	0	0.11	1
AC138123.1	0.0868993	-0.153847	0	0.11	1
DNAJC22	0.0869403	-0.167052	0	0.11	1
FBN2	0.0869449	0.353008	0.458	0.33	1
WDCP	0.0869792	-0.163762	0	0.11	1
OTUD3	0.0871155	-0.180138	0	0.11	1
AL691420.1	0.0871163	-0.19633	0	0.11	1
SETD1B	0.0871516	0.156123	0.167	0.072	1
RHBDF1	0.0872207	0.20937	0.292	0.164	1
TRIML2	0.0872243	-0.205959	0	0.11	1
CAVIN3	0.0872368	0.208304	1	0.992	1
MDFIC	0.0873812	-0.38033	0.333	0.483	1
PDXK	0.0874196	0.215766	0.958	0.905	1
LMNB1	0.0875187	-0.254046	0.083	0.24	1
LAGE3	0.087664	0.210552	0.75	0.657	1
CDK2AP1	0.0877653	0.198642	0.958	0.882	1
MCTS1	0.0877714	0.243293	0.958	0.862	1
WDR70	0.0878843	0.255821	0.583	0.399	1
DNAJC24	0.0878972	0.238336	0.417	0.266	1
ADNP2	0.0880401	0.172904	0.25	0.128	1
GLRX	0.0880609	0.156166	1	0.992	1
CD164	0.0881426	-0.328672	0.625	0.737	1
CEP57L1	0.0882847	-0.251922	0.167	0.348	1
STN1	0.0884923	0.132228	0.5	0.304	1
RETREG2	0.088503	0.165158	0.375	0.22	1
NIF3L1	0.0885563	-0.246956	0.125	0.279	1
RNASEH1	0.088559	0.283098	0.708	0.558	1
MYL6B	0.0885784	0.195407	1	0.969	1
ADCY6	0.0886692	0.149545	0.333	0.187	1
PRPS1	0.0887909	0.177524	0.458	0.281	1
NAGS	0.088807	0.10147	0.125	0.046	1
MOB4	0.0889522	0.208439	0.792	0.724	1
TAP1	0.0889591	0.130877	0.375	0.21	1
RDH14	0.0891236	0.214329	0.667	0.463	1
KIF11	0.0893313	-0.410489	0.083	0.223	1
NAAA	0.0893716	0.166575	0.333	0.187	1
DDX39A	0.0894886	-0.275107	0.417	0.568	1
ATP5MPL	0.0895468	0.218707	1	0.99	1
ZNF787	0.0896632	-0.252473	0.125	0.279	1
KLHDC3	0.0897602	0.26707	0.417	0.274	1
CAPN7	0.0898017	-0.252948	0.167	0.338	1
PDLIM3	0.0900331	0.182366	0.583	0.391	1
HCP5	0.0901315	0.0979552	0.125	0.046	1
HIST1H1A	0.0901486	-0.934539	0.083	0.228	1
KAT6B	0.0901865	-0.226603	0.208	0.396	1
NEMP1	0.0903277	0.164769	0.208	0.1	1
LRRC57	0.0903514	0.20937	0.292	0.164	1
RMDN3	0.0904494	0.16959	0.333	0.189	1
MIB2	0.0905353	-0.204892	0.083	0.24	1
SLC25A38	0.0907279	-0.194268	0.042	0.174	1
MRPS36	0.09108	0.214987	0.958	0.793	1
TRAF2	0.09111	0.132053	0.25	0.125	1
MMP25-AS1	0.0911339	-0.153847	0	0.107	1
C1orf112	0.0911726	-0.15716	0	0.107	1
LRRC75A	0.0911727	-0.160465	0	0.107	1
METTL22	0.0911827	-0.201276	0.083	0.23	1
ZNF234	0.0912767	-0.170335	0	0.107	1
ST3GAL2	0.0914394	0.197646	0.333	0.194	1
RPS6KB2	0.0914668	0.233814	0.625	0.476	1
CDH9	0.09147	0.0909518	0.125	0.046	1
NUP88	0.0916133	-0.168525	0.125	0.294	1
RBBP7	0.0916479	0.189561	0.917	0.714	1
THOC2	0.0919182	-0.29016	0.375	0.57	1
SEPTIN7	0.0919395	0.186076	1	0.985	1
PNKD	0.0919671	-0.272063	0.625	0.803	1
POLE2	0.0921125	-0.242971	0.042	0.171	1
AC010642.2	0.0921222	0.19411	0.75	0.581	1
AC010343.3	0.0922275	0.574217	0.417	0.292	1
FBXW4	0.0923561	0.119172	0.292	0.153	1
SLC16A3	0.0923693	0.176291	0.917	0.775	1
UGCG	0.0923961	0.331716	0.75	0.642	1
RBL2	0.0924632	-0.227694	0.083	0.228	1
PISD	0.0924649	-0.2335	0.083	0.228	1
NCOA4	0.0926632	0.33471	0.583	0.465	1
AOX1	0.0928826	0.119172	0.25	0.125	1
IFNAR2	0.0929876	0.218707	0.417	0.271	1
CDC42BPB	0.0930599	0.230203	0.708	0.555	1
TOM1	0.0931153	0.146917	0.417	0.248	1
STMP1	0.0931509	-0.255636	0.917	0.974	1
CHST7	0.0931908	0.177439	0.292	0.161	1
ALKBH3	0.0932547	-0.227694	0.083	0.228	1
UCHL1	0.0933954	0.244175	1	1	1
TLN2	0.0936463	-0.221865	0.083	0.228	1
MLF2	0.0936567	0.181005	1	0.962	1
CENPP	0.0936835	-0.334194	0.083	0.223	1
LINC00665	0.0938946	-0.215778	0.042	0.171	1
SH3BGRL2	0.0939375	0.115741	0.167	0.072	1
CENPW	0.093953	-0.404988	0.583	0.724	1
ITGA3	0.0939677	0.254399	0.875	0.721	1
CHD4	0.0939851	0.350497	0.875	0.685	1
MELK	0.0940151	-0.368707	0.125	0.276	1
SH2B3	0.0942728	0.179043	0.542	0.355	1
LINC00662	0.0943222	-0.203526	0.042	0.171	1
TCTN1	0.0944985	0.218707	0.25	0.136	1
IL13RA1	0.0945883	-0.138845	0.167	0.358	1
SH3BP1	0.0947795	0.171011	0.375	0.225	1
HLTF	0.0947836	-0.339587	0.5	0.614	1
GADD45GIP1	0.0947911	0.175519	1	1	1
MDM2	0.0947955	0.353008	0.5	0.35	1
LINC01687	0.094828	0.337477	0.5	0.345	1
CASP7	0.0949543	-0.191168	0.042	0.171	1
BAZ2B	0.0951255	0.178531	0.583	0.384	1
ADAMTS12	0.0953296	0.257388	0.625	0.481	1
ASAP3	0.0954641	0.102098	0.167	0.072	1
TRIM11	0.0954836	-0.147198	0	0.105	1
AC048341.1	0.0954836	-0.150526	0	0.105	1
ALKBH1	0.0955988	-0.15716	0	0.105	1
PRKAA2	0.0956663	-0.17361	0	0.105	1
HIST1H2BC	0.0957226	-0.170335	0	0.105	1
TNIP2	0.0958651	0.258723	0.583	0.437	1
TRMU	0.096031	-0.229978	0.125	0.286	1
PECAM1	0.0960764	0.133491	0.083	0.026	1
RPL3	0.0961924	-0.116804	1	1	1
IL12A	0.0963399	0.10445	0.042	0.008	1
AC016394.2	0.0963399	0.10445	0.042	0.008	1
AC036222.1	0.0963399	0.10445	0.042	0.008	1
AC020912.1	0.0963399	0.10445	0.042	0.008	1
MND1	0.0963425	-0.343172	0.167	0.322	1
BDKRB2	0.0964026	0.112554	0.208	0.097	1
HACD2	0.0967293	0.209643	0.333	0.192	1
RAB27A	0.0968121	0.119172	0.5	0.307	1
MSH3	0.0968326	-0.330276	0.208	0.353	1
ZNF587	0.0968761	0.153937	0.125	0.049	1
RCN1	0.0969124	-0.290473	0.833	0.88	1
FAM110A	0.0970077	0.108903	0.167	0.072	1
UBR4	0.0970167	-0.291204	0.25	0.412	1
CCDC85B	0.0970928	0.263168	1	0.98	1
PIR	0.0971018	0.154577	0.333	0.189	1
AL391840.3	0.0972983	0.129898	0.083	0.026	1
NTS	0.0973825	0.100793	0.042	0.008	1
KCNG1	0.0973825	0.100793	0.042	0.008	1
ZMYND8	0.0973865	-0.265492	0.333	0.519	1
C1GALT1	0.0974407	0.233504	0.542	0.368	1
WDR37	0.0975181	-0.179052	0.083	0.238	1
MDC1	0.0975287	0.144208	0.292	0.159	1
CKAP4	0.0975566	0.276911	0.958	0.985	1
TWISTNB	0.0976843	0.202406	0.583	0.389	1
MRPS22	0.0976949	0.158546	0.833	0.581	1
ITGB1	0.0978482	0.183295	1	1	1
EIF2B5	0.0978924	-0.188581	0.167	0.338	1
INO80E	0.097894	0.228325	0.542	0.376	1
ACTG1	0.0980507	0.170705	1	0.997	1
ZFAND3	0.0981664	0.210595	0.875	0.726	1
TIMM10B	0.0981938	0.24885	0.417	0.286	1
SEC14L2	0.0982285	0.254399	0.417	0.276	1
ANKRD1	0.0983155	-0.721586	0.167	0.315	1
RGS4	0.0983611	-0.287828	0.375	0.581	1
IPO7	0.0984141	-0.278512	0.458	0.675	1
KITLG	0.0984603	-0.118772	0.083	0.238	1
MEAK7	0.0984684	-0.213707	0.125	0.286	1
DACT1	0.0985402	0.171639	0.083	0.026	1
C9orf40	0.098545	-0.32808	0.25	0.402	1
TEK	0.0985697	0.102098	0.167	0.072	1
TMCO4	0.0989085	-0.19736	0.042	0.169	1
ZNF160	0.0989101	-0.200446	0.042	0.169	1
LINC00632	0.0989272	-0.229978	0.125	0.284	1
RHBDF2	0.0990048	0.179359	0.25	0.133	1
URGCP	0.0990178	-0.246956	0.125	0.274	1
RMND5B	0.0991087	0.241162	0.375	0.246	1
KCNK6	0.0991358	-0.200446	0.042	0.169	1
PITHD1	0.0991872	-0.161848	0.167	0.353	1
HOXD-AS2	0.099324	-0.266174	0.125	0.271	1
TMEM120A	0.0993374	0.277124	0.333	0.207	1
CEP63	0.0993988	-0.278348	0.208	0.358	1
LINC01355	0.0994889	0.0478667	0.042	0.008	1
TSSK3	0.0994889	0.0478667	0.042	0.008	1
SLAMF8	0.0994889	0.0478667	0.042	0.008	1
SLAMF7	0.0994889	0.0478667	0.042	0.008	1
AL031599.1	0.0994889	0.0478667	0.042	0.008	1
ANKRD45	0.0994889	0.0478667	0.042	0.008	1
AC010883.1	0.0994889	0.0478667	0.042	0.008	1
SLC4A5	0.0994889	0.0478667	0.042	0.008	1
AC097532.3	0.0994889	0.0478667	0.042	0.008	1
HOXD1	0.0994889	0.0478667	0.042	0.008	1
INHA	0.0994889	0.0478667	0.042	0.008	1
AC073052.2	0.0994889	0.0478667	0.042	0.008	1
ITGB5-AS1	0.0994889	0.0478667	0.042	0.008	1
WWTR1-AS1	0.0994889	0.0478667	0.042	0.008	1
AC104078.2	0.0994889	0.0478667	0.042	0.008	1
AC004053.1	0.0994889	0.0478667	0.042	0.008	1
PABPC4L	0.0994889	0.0478667	0.042	0.008	1
LINC02432	0.0994889	0.0478667	0.042	0.008	1
C4orf51	0.0994889	0.0478667	0.042	0.008	1
SMN2	0.0994889	0.0478667	0.042	0.008	1
AC018754.1	0.0994889	0.0478667	0.042	0.008	1
AC008522.1	0.0994889	0.0478667	0.042	0.008	1
ZNF608	0.0994889	0.0478667	0.042	0.008	1
AC008429.1	0.0994889	0.0478667	0.042	0.008	1
NKX2-5	0.0994889	0.0478667	0.042	0.008	1
AL391807.1	0.0994889	0.0478667	0.042	0.008	1
AC006329.1	0.0994889	0.0478667	0.042	0.008	1
AC004594.1	0.0994889	0.0478667	0.042	0.008	1
AC018638.7	0.0994889	0.0478667	0.042	0.008	1
AC078845.1	0.0994889	0.0478667	0.042	0.008	1
AC107959.1	0.0994889	0.0478667	0.042	0.008	1
ZNF704	0.0994889	0.0478667	0.042	0.008	1
AARD	0.0994889	0.0478667	0.042	0.008	1
AL365356.1	0.0994889	0.0478667	0.042	0.008	1
TIMM23B-AGAP6	0.0994889	0.0478667	0.042	0.008	1
MMRN2	0.0994889	0.0478667	0.042	0.008	1
AL133215.2	0.0994889	0.0478667	0.042	0.008	1
HMX2	0.0994889	0.0478667	0.042	0.008	1
AL035078.1	0.0994889	0.0478667	0.042	0.008	1
AP002761.2	0.0994889	0.0478667	0.042	0.008	1
AP001372.2	0.0994889	0.0478667	0.042	0.008	1
KIRREL3-AS1	0.0994889	0.0478667	0.042	0.008	1
EIF2S3B	0.0994889	0.0478667	0.042	0.008	1
AC008083.2	0.0994889	0.0478667	0.042	0.008	1
BCDIN3D-AS1	0.0994889	0.0478667	0.042	0.008	1
LINC00173	0.0994889	0.0478667	0.042	0.008	1
AC026333.4	0.0994889	0.0478667	0.042	0.008	1
AC073593.2	0.0994889	0.0478667	0.042	0.008	1
AL138966.2	0.0994889	0.0478667	0.042	0.008	1
LINC00545	0.0994889	0.0478667	0.042	0.008	1
AL390755.1	0.0994889	0.0478667	0.042	0.008	1
C13orf46	0.0994889	0.0478667	0.042	0.008	1
AC005520.5	0.0994889	0.0478667	0.042	0.008	1
AL049840.2	0.0994889	0.0478667	0.042	0.008	1
AC025043.1	0.0994889	0.0478667	0.042	0.008	1
RBPMS2	0.0994889	0.0478667	0.042	0.008	1
AC092120.3	0.0994889	0.0478667	0.042	0.008	1
AC130324.2	0.0994889	0.0478667	0.042	0.008	1
SRCIN1	0.0994889	0.0478667	0.042	0.008	1
AC007114.2	0.0994889	0.0478667	0.042	0.008	1
SECTM1	0.0994889	0.0478667	0.042	0.008	1
AC007998.3	0.0994889	0.0478667	0.042	0.008	1
APC2	0.0994889	0.0478667	0.042	0.008	1
AC005944.1	0.0994889	0.0478667	0.042	0.008	1
AC007292.3	0.0994889	0.0478667	0.042	0.008	1
AC024075.1	0.0994889	0.0478667	0.042	0.008	1
AC005253.1	0.0994889	0.0478667	0.042	0.008	1
ZNF575	0.0994889	0.0478667	0.042	0.008	1
KCNA7	0.0994889	0.0478667	0.042	0.008	1
LINC00653	0.0994889	0.0478667	0.042	0.008	1
AL109614.1	0.0994889	0.0478667	0.042	0.008	1
LINC00161	0.0994889	0.0478667	0.042	0.008	1
PCBP3	0.0994889	0.0478667	0.042	0.008	1
AC016027.1	0.0994889	0.0478667	0.042	0.008	1
FAM227A	0.0994889	0.0478667	0.042	0.008	1
RIBC1	0.0994889	0.0478667	0.042	0.008	1
ARL13A	0.0994889	0.0478667	0.042	0.008	1
RNF220	0.0996059	-0.227479	0.125	0.274	1
NIPSNAP3A	0.0996144	0.229315	0.458	0.32	1
LPXN	0.0998627	0.193689	0.708	0.522	1
EFTUD2	0.0998853	-0.205502	0.125	0.286	1
A4GALT	0.0999489	0.247089	0.25	0.136	1
IFIT5	0.100005	0.243323	0.417	0.286	1
GBA2	0.10008	-0.143863	0	0.102	1
ZNF512B	0.10008	-0.143863	0	0.102	1
SDCBP2-AS1	0.10012	-0.147198	0	0.102	1
FANCE	0.100195	-0.153847	0	0.102	1
LTBP4	0.100215	-0.143863	0.042	0.179	1
ZNF586	0.100261	-0.163762	0	0.102	1
XRCC2	0.100289	-0.163762	0	0.102	1
PRICKLE1	0.100347	-0.189875	0	0.102	1
UBAC1	0.100442	-0.199113	0.333	0.532	1
LINC00852	0.100561	0.0442096	0.042	0.008	1
AC100858.3	0.100561	0.0442096	0.042	0.008	1
AL161449.2	0.100561	0.0405619	0.042	0.008	1
SCART1	0.100561	0.0442096	0.042	0.008	1
AP001372.1	0.100561	0.0405619	0.042	0.008	1
SCRN1	0.100688	-0.247913	0.083	0.223	1
MIA2	0.100905	-0.285524	0.167	0.312	1
C15orf40	0.101071	-0.285219	0.333	0.496	1
TIA1	0.101087	-0.179052	0.083	0.235	1
KLHL24	0.101087	0.143419	0.125	0.049	1
FLI1	0.101336	-0.184834	0.083	0.235	1
CCDC14	0.101423	-0.295866	0.125	0.269	1
FAM177A1	0.101438	0.253159	1	0.939	1
SCFD1	0.101485	0.252559	0.833	0.754	1
RGS3	0.101486	-0.33434	0.417	0.563	1
H19	0.10164	0.0296735	0.042	0.008	1
ADK	0.101689	0.257129	0.958	0.849	1
EIF5	0.101741	-0.227509	0.917	0.972	1
RTKN2	0.101831	-0.309672	0.083	0.217	1
BZW2	0.101963	0.285822	0.833	0.66	1
TFDP1	0.10201	0.205651	0.75	0.573	1
SLC1A5	0.102159	0.184127	0.75	0.545	1
BUD23	0.102193	-0.281877	0.583	0.813	1
FOXD1	0.102238	0.25404	0.792	0.611	1
AC019163.1	0.102252	0.0790436	0.083	0.026	1
AC008691.1	0.102252	0.0790436	0.083	0.026	1
LINC00847	0.102252	0.0790436	0.083	0.026	1
HIST1H3E	0.102252	0.0790436	0.083	0.026	1
C9orf24	0.102252	0.0790436	0.083	0.026	1
TP53I11	0.102252	0.0790436	0.083	0.026	1
TSPAN8	0.102252	0.0790436	0.083	0.026	1
AC026401.3	0.102252	0.0790436	0.083	0.026	1
AC233723.1	0.102252	0.0790436	0.083	0.026	1
HADH	0.102273	-0.268242	0.208	0.358	1
RNF115	0.102296	0.252146	0.667	0.532	1
GLTP	0.102554	0.187502	0.667	0.488	1
GLB1	0.102631	-0.233071	0.125	0.274	1
DPP7	0.102739	0.290996	0.667	0.56	1
ZNF789	0.10275	0.172904	0.25	0.133	1
ANKRD50	0.102761	0.264341	0.417	0.281	1
AAMP	0.103081	0.218707	0.625	0.442	1
DNAJB12	0.103116	0.248789	0.583	0.432	1
SQSTM1	0.103278	-0.3591	0.833	0.903	1
NCAPH2	0.103291	-0.218942	0.083	0.223	1
MAP1B	0.103292	0.217481	1	0.985	1
TXNIP	0.103461	-0.16027	0.167	0.325	1
TGFBR1	0.10347	-0.209665	0.042	0.166	1
FCMR	0.103538	0.0754503	0.083	0.026	1
AL645933.2	0.103538	0.0754503	0.083	0.026	1
LINC00271	0.103538	0.0754503	0.083	0.026	1
SLC26A3	0.103538	0.071866	0.083	0.026	1
DNMT3B	0.103538	0.0754503	0.083	0.026	1
AVEN	0.103578	0.19446	0.875	0.629	1
FBXO8	0.103721	-0.204235	0.083	0.223	1
STT3B	0.103734	-0.236033	0.25	0.43	1
TMEM138	0.10386	0.15253	0.417	0.258	1
IRF3	0.103876	-0.245646	0.417	0.563	1
COL5A1	0.10391	0.146299	0.833	0.696	1
MSANTD2	0.103919	0.20627	0.292	0.169	1
FUT10	0.103944	-0.19736	0.042	0.166	1
SELENOH	0.104176	0.18159	1	0.997	1
UTP6	0.104244	-0.262507	0.333	0.514	1
SYT16	0.10438	0.172611	0.292	0.161	1
NUP107	0.104539	-0.163081	0.125	0.286	1
SLC25A37	0.104615	-0.318022	0.417	0.627	1
AC087386.1	0.104835	0.071866	0.083	0.026	1
MAST1	0.104835	0.0682905	0.083	0.026	1
BRD2	0.104877	0.225915	0.542	0.386	1
KDM4A-AS1	0.104893	-0.140519	0	0.1	1
TAF1A	0.104893	-0.140519	0	0.1	1
PEX11B	0.104933	-0.143863	0	0.1	1
XYLB	0.104933	-0.143863	0	0.1	1
TMTC4	0.104933	-0.143863	0	0.1	1
ZNF587B	0.104933	-0.143863	0	0.1	1
FUCA1	0.104933	-0.147198	0	0.1	1
TOB1	0.104934	0.17473	0.208	0.105	1
SPIN1	0.104961	0.413317	0.667	0.532	1
ERCC6L	0.104971	-0.147198	0	0.1	1
SH2D2A	0.105007	-0.150526	0	0.1	1
KIF3C	0.105007	-0.153847	0	0.1	1
GGA2	0.105087	0.293001	0.333	0.215	1
GPR158	0.105102	-0.170335	0	0.1	1
SPIN4	0.105128	-0.167052	0	0.1	1
RBM41	0.105274	0.237008	0.292	0.174	1
SHC1	0.105381	-0.141858	0.292	0.537	1
SYF2	0.10544	-0.291531	0.625	0.724	1
ANO6	0.105451	0.244167	0.583	0.481	1
GBP3	0.105525	0.173619	0.417	0.263	1
TMEM106B	0.105637	-0.261804	0.208	0.366	1
LRRIQ1	0.105797	0.10147	0.125	0.049	1
TCEAL4	0.105942	0.263158	1	0.921	1
CDK5RAP1	0.106147	0.160992	0.417	0.256	1
CCPG1	0.106315	0.157307	0.667	0.478	1
SMURF2	0.106414	0.502881	0.875	0.895	1
BBS10	0.106462	0.115741	0.167	0.074	1
UPRT	0.106462	0.115741	0.167	0.074	1
CCDC137	0.106583	-0.240156	0.25	0.44	1
OSCAR	0.107001	0.193939	0.25	0.133	1
ATP1A1-AS1	0.107289	0.0979552	0.125	0.049	1
KCNS3	0.107289	0.0944493	0.125	0.049	1
STAP2	0.107289	0.0979552	0.125	0.049	1
MAST3	0.107289	0.0979552	0.125	0.049	1
FCF1	0.107367	0.212475	0.292	0.171	1
THOC3	0.107605	0.192449	0.375	0.235	1
GPATCH11	0.107795	-0.240078	0.167	0.325	1
PHF1	0.107799	0.261101	0.375	0.246	1
ZC3H15	0.108144	0.211929	0.917	0.859	1
NVL	0.108213	-0.213077	0.083	0.22	1
GOLGA4	0.108308	0.259467	0.958	0.849	1
NCOA1	0.108491	-0.281366	0.208	0.363	1
SLC7A5	0.108568	-0.262183	0.083	0.217	1
COPZ2	0.108603	0.150104	0.958	0.714	1
ACAP1	0.10872	-0.19736	0.042	0.164	1
SLC25A21	0.108796	0.0944493	0.125	0.049	1
FAM111A	0.108852	-0.336174	0.167	0.325	1
NDUFA8	0.108869	0.207187	0.958	0.916	1
U2AF1L4	0.108968	-0.188063	0.042	0.164	1
TACC2	0.108971	-0.19736	0.042	0.164	1
PSMC3IP	0.109051	-0.219332	0.125	0.289	1
GLE1	0.109218	-0.188063	0.042	0.164	1
GINS1	0.109466	-0.191168	0.042	0.164	1
USP13	0.109512	-0.227694	0.083	0.217	1
MMD	0.109709	-0.178704	0.042	0.164	1
AMPD2	0.10971	-0.18495	0.042	0.164	1
ZGPAT	0.109885	0.173619	0.417	0.266	1
PRMT3	0.109979	-0.103221	0.125	0.284	1
GINS2	0.109993	-0.378328	0.25	0.394	1
ENO3	0.110011	-0.143863	0	0.097	1
PRELID3A	0.110046	-0.150526	0	0.097	1
AC002074.1	0.11011	-0.160465	0	0.097	1
CYB5B	0.110188	-0.27004	0.25	0.407	1
MICAL2	0.110274	0.295565	0.875	0.749	1
TRPC4	0.110501	0.31076	0.583	0.422	1
ANAPC10	0.110639	-0.241826	0.333	0.486	1
NUTM2A-AS1	0.110753	0.360481	0.583	0.552	1
DYM	0.110855	-0.131667	0.167	0.345	1
ADAM33	0.110965	0.205032	0.167	0.077	1
KCTD17	0.110998	-0.170335	0.083	0.23	1
CTDSP2	0.111067	-0.229699	0.167	0.327	1
FANCI	0.111106	-0.287828	0.125	0.263	1
DUSP7	0.11117	0.122492	0.208	0.102	1
WDR48	0.111268	-0.167417	0.083	0.23	1
ANKS1A	0.111433	0.175206	0.375	0.233	1
TESPA1	0.111512	0.105497	0.167	0.074	1
ARL6IP1	0.111685	-0.448717	0.417	0.624	1
MYO6	0.111718	0.221223	0.5	0.355	1
USP3	0.111774	0.209153	0.583	0.422	1
UBAP2	0.111869	0.245844	0.542	0.432	1
DYNLL2	0.111915	-0.218942	0.083	0.217	1
FILIP1L	0.112505	0.429922	0.667	0.581	1
NAB2	0.112539	-0.161565	0.083	0.23	1
TM2D3	0.112541	-0.221865	0.167	0.325	1
SIK3	0.112581	0.263239	0.625	0.43	1
DCK	0.112698	-0.165805	0.125	0.281	1
FAM102B	0.113154	-0.200446	0.042	0.161	1
TMEM243	0.113299	-0.337154	0.292	0.419	1
MFAP5	0.113394	0.100063	0.375	0.217	1
NECAB3	0.113495	0.189181	0.458	0.309	1
C12orf75	0.11369	0.174863	1	1	1
PEBP1	0.113903	0.164129	1	0.995	1
CCDC25	0.113962	-0.313353	0.5	0.621	1
ELP5	0.114212	0.210285	0.792	0.647	1
CXXC1	0.114221	-0.18495	0.042	0.161	1
BLZF1	0.114313	-0.233071	0.125	0.266	1
IMPDH2	0.114375	-0.329418	0.625	0.726	1
TMEM177	0.114485	-0.18495	0.042	0.161	1
TRIM8	0.114574	0.252655	0.5	0.343	1
TNFAIP8L1	0.114745	-0.181831	0.042	0.161	1
MMS22L	0.114757	-0.274333	0.125	0.261	1
PML	0.114762	0.173619	0.417	0.261	1
CASTOR3	0.114949	0.163275	0.25	0.136	1
CRACR2A	0.114974	-0.128366	0.042	0.171	1
KHDC1	0.115004	-0.181831	0.042	0.161	1
SPC25	0.115055	-0.359131	0.125	0.266	1
[truncated: 23,283 more rows]

## Sheet: gRNA-3vsgRNA1-DEG
Gene	p_val	avg_log2FC	pct.1	pct.2	p_val_adj
LINC01176	6.63e-08	0.130616	0.098	0.003	0.00167546
SELENOM	5.83e-07	-0.676954	1	0.997	0.0147354
METTL26	3.41e-06	0.501779	1	0.969	0.0861647
PCDHGA8	7.4e-06	0.0981946	0.073	0.003	0.186977
AC007032.1	7.4e-06	0.0981946	0.073	0.003	0.186977
AL391839.3	7.4e-06	0.0981946	0.073	0.003	0.186977
EDA	7.4e-06	0.0981946	0.073	0.003	0.186977
FP700111.1	1.26e-05	0.0687128	0.049	0	0.318802
CAPN14	1.26e-05	0.0687128	0.049	0	0.318802
ASB5	1.26e-05	0.0687128	0.049	0	0.318802
AC093307.1	1.26e-05	0.0687128	0.049	0	0.318802
AC018752.1	1.26e-05	0.0687128	0.049	0	0.318802
AL590006.1	1.26e-05	0.0687128	0.049	0	0.318802
AC010677.2	1.26e-05	0.0687128	0.049	0	0.318802
GAS1RR	1.26e-05	0.0687128	0.049	0	0.318802
MMP1	1.26e-05	0.0687128	0.049	0	0.318802
AL035448.1	1.26e-05	0.0687128	0.049	0	0.318802
FO393401.1	1.26e-05	0.0687128	0.049	0	0.318802
AC005005.4	1.26e-05	0.0687128	0.049	0	0.318802
ACTG1	1.73e-05	0.467347	1	0.997	0.438561
PRDX5	3.82e-05	-0.418245	1	1	0.965615
AC097480.1	7.46e-05	0.27162	0.098	0.01	1
AC009961.4	0.000109734	0.0945189	0.073	0.005	1
FLNC-AS1	0.000109734	0.0945189	0.073	0.005	1
AC034268.2	0.000109734	0.0945189	0.073	0.005	1
ASB13	0.000123791	0.133179	0.122	0.018	1
IGFBP7	0.000194213	-0.499457	1	1	1
SGO1	0.000228041	0.355094	0.439	0.192	1
AC009961.1	0.000295879	0.164205	0.122	0.02	1
ZKSCAN3	0.000303334	0.13679	0.122	0.02	1
MTFR2	0.000305986	0.239926	0.268	0.087	1
STMN1	0.000307413	0.613138	0.951	0.898	1
CENPH	0.000358135	0.464734	0.512	0.276	1
ZBTB46	0.000414441	0.180224	0.146	0.031	1
FN1	0.000484166	-0.763465	1	0.98	1
GCNT2	0.000533274	0.400405	0.488	0.251	1
SLC2A4RG	0.00061598	0.462701	0.878	0.637	1
ST3GAL6-AS1	0.000666694	0.201384	0.244	0.079	1
CDO1	0.000668581	0.0908526	0.073	0.008	1
AC005400.1	0.000668581	0.0908526	0.073	0.008	1
AC078845.1	0.000668581	0.0908526	0.073	0.008	1
AL133215.2	0.000668581	0.0908526	0.073	0.008	1
AC092120.3	0.000668581	0.0908526	0.073	0.008	1
AC005394.1	0.000668581	0.0908526	0.073	0.008	1
PLA2G6	0.000668581	0.0908526	0.073	0.008	1
AC138409.3	0.000692899	0.0871956	0.073	0.008	1
KREMEN1	0.000692899	0.0871956	0.073	0.008	1
APBB1IP	0.000694797	0.408927	0.707	0.473	1
AP005717.2	0.000707222	0.130616	0.049	0.003	1
DGCR6L	0.000717011	-0.46717	0.366	0.606	1
ATF7IP2	0.000717988	0.0835478	0.073	0.008	1
NPPC	0.000717996	0.0799092	0.073	0.008	1
LINC01772	0.000719047	0.0650277	0.049	0.003	1
FOXD2	0.000719047	0.0650277	0.049	0.003	1
TSACC	0.000719047	0.0650277	0.049	0.003	1
AC122697.1	0.000719047	0.0650277	0.049	0.003	1
AC109322.2	0.000719047	0.0650277	0.049	0.003	1
HOTAIR	0.000719047	0.0650277	0.049	0.003	1
HOXC-AS1	0.000719047	0.0650277	0.049	0.003	1
DIAPH3-AS1	0.000719047	0.0650277	0.049	0.003	1
AL442067.3	0.000719047	0.0650277	0.049	0.003	1
AC016355.1	0.000719047	0.0650277	0.049	0.003	1
AC004702.1	0.000719047	0.0650277	0.049	0.003	1
AC130324.3	0.000719047	0.0650277	0.049	0.003	1
ADAP2	0.000719047	0.0650277	0.049	0.003	1
AP001109.1	0.000719047	0.0650277	0.049	0.003	1
IZUMO4	0.000719047	0.0650277	0.049	0.003	1
MAGEE1	0.000719047	0.0650277	0.049	0.003	1
MAGEC1	0.000719047	0.0650277	0.049	0.003	1
CLDN4	0.000736409	0.118823	0.122	0.023	1
FAM131A	0.000781174	0.296912	0.366	0.161	1
AL139246.5	0.000796487	0.14985	0.146	0.033	1
NAA50	0.000800937	-0.465626	0.415	0.662	1
SMS	0.000819585	0.357056	0.976	0.985	1
VIM	0.000824151	0.252889	1	1	1
CDCA5	0.000830039	0.313894	0.415	0.187	1
FGF5	0.000840486	0.349828	0.927	0.76	1
ECT2	0.000897441	0.593963	0.61	0.384	1
DNAAF5	0.000898325	0.240417	0.317	0.125	1
RABAC1	0.000911754	-0.355263	1	0.997	1
PLP2	0.000918288	0.489571	0.951	0.918	1
AC037486.1	0.000985596	0.402616	0.415	0.194	1
LY96	0.00105037	-0.433588	0.171	0.432	1
EPB41L5	0.00125072	0.208222	0.22	0.072	1
MCPH1-AS1	0.00141999	0.125983	0.122	0.026	1
CST3	0.00146013	-0.369871	0.951	0.987	1
DYRK3	0.00147061	0.335587	0.341	0.159	1
HULC	0.00148067	0.158955	0.146	0.036	1
TPM1	0.00153651	-0.322075	1	0.997	1
NEMP1	0.001706	0.185728	0.268	0.1	1
POLE3	0.00174337	0.335666	0.61	0.366	1
KAT2B	0.00185948	0.155441	0.171	0.049	1
MT1X	0.00187123	-0.662407	0.366	0.596	1
ZNF615	0.00199308	0.14041	0.098	0.018	1
USP14	0.0020322	0.353524	0.854	0.685	1
C1orf127	0.00206835	0.0347654	0.024	0	1
TMEM51-AS1	0.00206835	0.0347654	0.024	0	1
CLCNKA	0.00206835	0.0347654	0.024	0	1
IL22RA1	0.00206835	0.0347654	0.024	0	1
AL445490.1	0.00206835	0.0347654	0.024	0	1
BMP8A	0.00206835	0.0347654	0.024	0	1
EFCAB14-AS1	0.00206835	0.0347654	0.024	0	1
AL354949.1	0.00206835	0.0347654	0.024	0	1
ERICH3	0.00206835	0.0347654	0.024	0	1
LINC02785	0.00206835	0.0347654	0.024	0	1
CD160	0.00206835	0.0347654	0.024	0	1
PPIAL4G	0.00206835	0.0347654	0.024	0	1
CD5L	0.00206835	0.0347654	0.024	0	1
KIRREL1-IT1	0.00206835	0.0347654	0.024	0	1
AL359541.1	0.00206835	0.0347654	0.024	0	1
AL445228.2	0.00206835	0.0347654	0.024	0	1
LINC01693	0.00206835	0.0347654	0.024	0	1
LEFTY1	0.00206835	0.0347654	0.024	0	1
AL670729.2	0.00206835	0.0347654	0.024	0	1
AL117350.1	0.00206835	0.0347654	0.024	0	1
AL136988.2	0.00206835	0.0347654	0.024	0	1
AL359551.1	0.00206835	0.0347654	0.024	0	1
AL591623.1	0.00206835	0.0347654	0.024	0	1
OR14A2	0.00206835	0.0347654	0.024	0	1
AC141930.1	0.00206835	0.0347654	0.024	0	1
U91324.1	0.00206835	0.0347654	0.024	0	1
AC106053.1	0.00206835	0.0347654	0.024	0	1
AGBL5-AS1	0.00206835	0.0347654	0.024	0	1
LINC01794	0.00206835	0.0687128	0.024	0	1
LINC02579	0.00206835	0.0347654	0.024	0	1
LINC01800	0.00206835	0.0347654	0.024	0	1
AC007881.2	0.00206835	0.0347654	0.024	0	1
ALMS1-IT1	0.00206835	0.0347654	0.024	0	1
C2orf78	0.00206835	0.0347654	0.024	0	1
AC012363.1	0.00206835	0.0347654	0.024	0	1
PROC	0.00206835	0.0347654	0.024	0	1
POTEI	0.00206835	0.0347654	0.024	0	1
AC092620.2	0.00206835	0.0347654	0.024	0	1
AC106900.1	0.00206835	0.0347654	0.024	0	1
AC016737.1	0.00206835	0.0347654	0.024	0	1
FSIP2	0.00206835	0.0347654	0.024	0	1
AC016746.1	0.00206835	0.0347654	0.024	0	1
KIAA2012-AS1	0.00206835	0.0347654	0.024	0	1
CHRNG	0.00206835	0.0347654	0.024	0	1
AC023480.1	0.00206835	0.0347654	0.024	0	1
ITPR1-DT	0.00206835	0.0347654	0.024	0	1
AC026167.1	0.00206835	0.0347654	0.024	0	1
GRM7-AS3	0.00206835	0.0347654	0.024	0	1
AC091493.1	0.00206835	0.0347654	0.024	0	1
TRIM71	0.00206835	0.0347654	0.024	0	1
LRRC2-AS1	0.00206835	0.0347654	0.024	0	1
PRKAR2A-AS1	0.00206835	0.0347654	0.024	0	1
AC021660.4	0.00206835	0.0347654	0.024	0	1
AC020651.2	0.00206835	0.0347654	0.024	0	1
AC084036.1	0.00206835	0.0347654	0.024	0	1
LINC01192	0.00206835	0.0347654	0.024	0	1
LINC01322	0.00206835	0.0347654	0.024	0	1
AC026353.1	0.00206835	0.0347654	0.024	0	1
AC008040.1	0.00206835	0.0347654	0.024	0	1
AC072022.2	0.00206835	0.0347654	0.024	0	1
AC104825.1	0.00206835	0.0347654	0.024	0	1
AC006160.1	0.00206835	0.0347654	0.024	0	1
AC027607.1	0.00206835	0.0347654	0.024	0	1
AC079921.2	0.00206835	0.0347654	0.024	0	1
AC114757.1	0.00206835	0.0347654	0.024	0	1
AC023154.1	0.00206835	0.0347654	0.024	0	1
PDCL2	0.00206835	0.0347654	0.024	0	1
ARL9	0.00206835	0.0347654	0.024	0	1
AC093730.1	0.00206835	0.0347654	0.024	0	1
WDFY3-AS1	0.00206835	0.0347654	0.024	0	1
MMRN1	0.00206835	0.0347654	0.024	0	1
NPNT	0.00206835	0.10188	0.024	0	1
AC098798.1	0.00206835	0.0347654	0.024	0	1
IL21-AS1	0.00206835	0.0347654	0.024	0	1
LINC02511	0.00206835	0.0347654	0.024	0	1
FRG2	0.00206835	0.0347654	0.024	0	1
AC016575.1	0.00206835	0.0347654	0.024	0	1
CAPSL	0.00206835	0.0347654	0.024	0	1
AC008945.2	0.00206835	0.0347654	0.024	0	1
AC010273.2	0.00206835	0.0347654	0.024	0	1
AC106818.2	0.00206835	0.0347654	0.024	0	1
LINC02163	0.00206835	0.0347654	0.024	0	1
AC008574.1	0.00206835	0.0347654	0.024	0	1
AC010255.3	0.00206835	0.0347654	0.024	0	1
LINC02240	0.00206835	0.0347654	0.024	0	1
AC104109.2	0.00206835	0.0347654	0.024	0	1
CATSPER3	0.00206835	0.0347654	0.024	0	1
PCDHB7	0.00206835	0.0347654	0.024	0	1
AC005740.3	0.00206835	0.0347654	0.024	0	1
AC010476.2	0.00206835	0.0347654	0.024	0	1
ELOVL2	0.00206835	0.0347654	0.024	0	1
AL590062.1	0.00206835	0.0347654	0.024	0	1
PI16	0.00206835	0.0347654	0.024	0	1
AL365226.2	0.00206835	0.0347654	0.024	0	1
FO393414.3	0.00206835	0.0347654	0.024	0	1
LINC01013	0.00206835	0.0347654	0.024	0	1
FILNC1	0.00206835	0.0347654	0.024	0	1
ADGB	0.00206835	0.0347654	0.024	0	1
AL117344.2	0.00206835	0.0347654	0.024	0	1
PACRG	0.00206835	0.0347654	0.024	0	1
LINC02544	0.00206835	0.0347654	0.024	0	1
AC147651.4	0.00206835	0.0347654	0.024	0	1
AC092171.5	0.00206835	0.0347654	0.024	0	1
STEAP2-AS1	0.00206835	0.0347654	0.024	0	1
KPNA7	0.00206835	0.0347654	0.024	0	1
AC011005.1	0.00206835	0.0347654	0.024	0	1
OR2A7	0.00206835	0.0347654	0.024	0	1
AC004908.3	0.00206835	0.0347654	0.024	0	1
AC087269.1	0.00206835	0.0347654	0.024	0	1
LPL	0.00206835	0.0347654	0.024	0	1
AC007991.3	0.00206835	0.0347654	0.024	0	1
AC107952.2	0.00206835	0.0347654	0.024	0	1
AC068700.1	0.00206835	0.0347654	0.024	0	1
AC132219.1	0.00206835	0.0347654	0.024	0	1
AC016877.3	0.00206835	0.0347654	0.024	0	1
GRHL2	0.00206835	0.0687128	0.024	0	1
DEPTOR	0.00206835	0.0347654	0.024	0	1
AC090921.1	0.00206835	0.134301	0.024	0	1
ERICD	0.00206835	0.0347654	0.024	0	1
SLC24A2	0.00206835	0.0347654	0.024	0	1
CCL27	0.00206835	0.0347654	0.024	0	1
C9orf57	0.00206835	0.0347654	0.024	0	1
AL160269.1	0.00206835	0.0347654	0.024	0	1
LINC01509	0.00206835	0.0347654	0.024	0	1
TTC16	0.00206835	0.0347654	0.024	0	1
AL669970.2	0.00206835	0.0347654	0.024	0	1
AKR1E2	0.00206835	0.0347654	0.024	0	1
AL157395.1	0.00206835	0.0347654	0.024	0	1
AL359697.1	0.00206835	0.0347654	0.024	0	1
PTPN20	0.00206835	0.0347654	0.024	0	1
ACSM6	0.00206835	0.0347654	0.024	0	1
ELOVL3	0.00206835	0.0347654	0.024	0	1
CFAP43	0.00206835	0.0347654	0.024	0	1
OR56A1	0.00206835	0.0347654	0.024	0	1
AC107886.1	0.00206835	0.0347654	0.024	0	1
AL136146.2	0.00206835	0.0347654	0.024	0	1
AC021723.2	0.00206835	0.0347654	0.024	0	1
PRG2	0.00206835	0.0347654	0.024	0	1
AP003557.2	0.00206835	0.0347654	0.024	0	1
AP000654.1	0.00206835	0.0347654	0.024	0	1
MMP20	0.00206835	0.0347654	0.024	0	1
SLN	0.00206835	0.0347654	0.024	0	1
AP002884.3	0.00206835	0.0347654	0.024	0	1
APOA1-AS	0.00206835	0.0347654	0.024	0	1
TREH	0.00206835	0.0347654	0.024	0	1
AP001993.1	0.00206835	0.0347654	0.024	0	1
AC007848.1	0.00206835	0.0347654	0.024	0	1
AC091814.1	0.00206835	0.0347654	0.024	0	1
AC008115.1	0.00206835	0.0347654	0.024	0	1
AC007535.1	0.00206835	0.0347654	0.024	0	1
AC024940.1	0.00206835	0.0347654	0.024	0	1
LYZ	0.00206835	0.0347654	0.024	0	1
AC083809.1	0.00206835	0.0347654	0.024	0	1
AC128707.1	0.00206835	0.0347654	0.024	0	1
ACSS3	0.00206835	0.0347654	0.024	0	1
LINC02456	0.00206835	0.0347654	0.024	0	1
CASC18	0.00206835	0.0347654	0.024	0	1
LINC01405	0.00206835	0.0347654	0.024	0	1
TEX26-AS1	0.00206835	0.0347654	0.024	0	1
AL138820.1	0.00206835	0.0347654	0.024	0	1
LINC01075	0.00206835	0.0347654	0.024	0	1
THTPA	0.00206835	0.0347654	0.024	0	1
TGM1	0.00206835	0.0347654	0.024	0	1
AL136418.1	0.00206835	0.0347654	0.024	0	1
AL162311.3	0.00206835	0.0347654	0.024	0	1
LINC02316	0.00206835	0.0347654	0.024	0	1
AL157871.6	0.00206835	0.0347654	0.024	0	1
GPR176-DT	0.00206835	0.0347654	0.024	0	1
AC018362.2	0.00206835	0.0347654	0.024	0	1
SPESP1	0.00206835	0.0347654	0.024	0	1
ODF3L1	0.00206835	0.0347654	0.024	0	1
CPEB1-AS1	0.00206835	0.0347654	0.024	0	1
AC026458.2	0.00206835	0.0347654	0.024	0	1
AC002550.1	0.00206835	0.0347654	0.024	0	1
AC092118.2	0.00206835	0.0347654	0.024	0	1
TPPP3	0.00206835	0.0347654	0.024	0	1
LINC02136	0.00206835	0.0347654	0.024	0	1
AC010531.5	0.00206835	0.0347654	0.024	0	1
AC005696.1	0.00206835	0.0347654	0.024	0	1
USP6	0.00206835	0.0347654	0.024	0	1
DNAH2	0.00206835	0.0347654	0.024	0	1
USP43	0.00206835	0.0347654	0.024	0	1
AC005703.7	0.00206835	0.0687128	0.024	0	1
AC005726.3	0.00206835	0.0347654	0.024	0	1
RHBDL3	0.00206835	0.0347654	0.024	0	1
AC025211.1	0.00206835	0.0347654	0.024	0	1
AC015936.1	0.00206835	0.0347654	0.024	0	1
AC004584.3	0.00206835	0.0347654	0.024	0	1
PPM1E	0.00206835	0.0347654	0.024	0	1
PPP1R27	0.00206835	0.0347654	0.024	0	1
HEXD-IT1	0.00206835	0.0347654	0.024	0	1
AP005482.1	0.00206835	0.0347654	0.024	0	1
AC009802.1	0.00206835	0.0347654	0.024	0	1
LIVAR	0.00206835	0.0347654	0.024	0	1
AC005256.1	0.00206835	0.0347654	0.024	0	1
ACER1	0.00206835	0.0347654	0.024	0	1
AC010336.1	0.00206835	0.0347654	0.024	0	1
ICAM4	0.00206835	0.0347654	0.024	0	1
AC011446.2	0.00206835	0.0347654	0.024	0	1
AC020916.2	0.00206835	0.0347654	0.024	0	1
KCNN1	0.00206835	0.0347654	0.024	0	1
TSSK6	0.00206835	0.0347654	0.024	0	1
AC005381.1	0.00206835	0.0347654	0.024	0	1
NOP53-AS1	0.00206835	0.0347654	0.024	0	1
ADM5	0.00206835	0.0347654	0.024	0	1
VN1R1	0.00206835	0.0347654	0.024	0	1
EBF4	0.00206835	0.0347654	0.024	0	1
SNAP25	0.00206835	0.0347654	0.024	0	1
AL049794.1	0.00206835	0.0347654	0.024	0	1
LINC01597	0.00206835	0.0347654	0.024	0	1
LINC01754	0.00206835	0.0347654	0.024	0	1
LINC01716	0.00206835	0.0347654	0.024	0	1
FP565260.1	0.00206835	0.0347654	0.024	0	1
CU633967.1	0.00206835	0.0347654	0.024	0	1
FP236383.4	0.00206835	0.0347654	0.024	0	1
C21orf62	0.00206835	0.0347654	0.024	0	1
AC016027.2	0.00206835	0.0347654	0.024	0	1
AC000068.1	0.00206835	0.0347654	0.024	0	1
AC007663.4	0.00206835	0.0347654	0.024	0	1
SLC5A4	0.00206835	0.0347654	0.024	0	1
ENTHD1	0.00206835	0.0347654	0.024	0	1
AL683807.1	0.00206835	0.0347654	0.024	0	1
DHRSX-IT1	0.00206835	0.0347654	0.024	0	1
VCX3A	0.00206835	0.0347654	0.024	0	1
LINC01203	0.00206835	0.0347654	0.024	0	1
BMX	0.00206835	0.0347654	0.024	0	1
AC232271.3	0.00206835	0.0347654	0.024	0	1
USP27X-AS1	0.00206835	0.0347654	0.024	0	1
PFKFB1	0.00206835	0.0347654	0.024	0	1
PGAM4	0.00206835	0.0347654	0.024	0	1
LHFPL1	0.00206835	0.0347654	0.024	0	1
AC006144.2	0.00206835	0.0347654	0.024	0	1
PRRG3	0.00206835	0.0347654	0.024	0	1
GHRL	0.0021087	0.108701	0.098	0.018	1
S100A13	0.00211848	-0.302103	1	1	1
H2AFZ	0.00213055	0.505062	1	0.995	1
APOO	0.00213095	-0.362517	0.122	0.353	1
DBF4	0.0021498	0.523989	0.488	0.286	1
KCTD21-AS1	0.00225021	0.10147	0.098	0.018	1
AC026471.4	0.00226316	0.142726	0.146	0.038	1
IQCD	0.00234567	0.139177	0.146	0.038	1
FAM107A	0.00234853	0.119617	0.073	0.01	1
GLIPR1	0.00237749	-0.435279	0.951	0.954	1
TCP11	0.00244369	0.0871956	0.073	0.01	1
LHFPL3	0.00244369	0.0871956	0.073	0.01	1
CIRBP-AS1	0.00244369	0.0871956	0.073	0.01	1
NRK	0.0024446	0.13679	0.073	0.01	1
AC007099.1	0.00251808	0.0799092	0.073	0.01	1
AC099520.1	0.00251808	0.0835478	0.073	0.01	1
KIAA1614	0.00260778	0.122399	0.122	0.028	1
GALNT7	0.00264456	0.232099	0.561	0.307	1
LINC01098	0.00286943	0.162619	0.22	0.077	1
MMP23B	0.00289385	0.380079	0.268	0.115	1
KHDRBS3	0.00299318	0.361455	0.561	0.327	1
SPINDOC	0.00301741	0.263166	0.293	0.128	1
CKS2	0.00304494	0.398147	0.829	0.693	1
MRPL58	0.00312676	0.340936	0.829	0.693	1
SNRPD3	0.00313424	0.34869	0.829	0.754	1
SATB2	0.00331084	-0.384231	0.122	0.348	1
SLFNL1-AS1	0.00334993	0.126716	0.195	0.064	1
AVEN	0.00342079	-0.37331	0.39	0.629	1
UBE2C	0.00344332	0.32977	0.634	0.412	1
MYL6	0.00345128	-0.149394	1	1	1
MIIP	0.00348856	0.297776	0.39	0.199	1
HNRNPL	0.00357395	0.302083	0.634	0.422	1
LZIC	0.00359335	0.354342	0.683	0.476	1
SZRD1	0.00360242	0.30884	0.707	0.465	1
GOLGA7	0.00361701	0.299276	0.537	0.32	1
ASPM	0.00363907	0.425987	0.561	0.332	1
LAP3	0.0036408	0.340039	0.659	0.486	1
PGD	0.00374723	-0.326767	0.171	0.409	1
ZNF33A	0.00378248	0.273026	0.463	0.256	1
NUPR1	0.00387083	-0.661757	0.122	0.327	1
PPP1R12A	0.00390625	0.295524	0.902	0.826	1
BLK	0.00394013	0.295508	0.561	0.345	1
ZNF334	0.00397803	0.164205	0.098	0.02	1
CSE1L	0.00415323	0.360037	0.561	0.366	1
CKS1B	0.00417951	0.520259	0.829	0.708	1
PIGK	0.00419812	0.294386	0.61	0.381	1
AKIRIN2	0.00423614	0.270633	0.61	0.376	1
SPDL1	0.00425571	0.32791	0.585	0.363	1
CCDC148	0.00426826	0.141468	0.171	0.054	1
LGMN	0.0042761	-0.394225	0.341	0.552	1
LINC00578	0.00429294	-0.464808	0.244	0.486	1
MAD2L1	0.00429343	0.480065	0.659	0.44	1
LINC00857	0.00433908	0.105081	0.098	0.02	1
TOR1AIP1	0.00437187	-0.305114	0.098	0.315	1
ALDH1L2	0.0044313	-0.291806	0.024	0.215	1
NPR3	0.0044345	-0.337342	0	0.169	1
TYW3	0.0045483	0.351259	0.78	0.591	1
ZWINT	0.0045639	0.401437	0.659	0.414	1
TUBGCP3	0.00457021	0.29478	0.39	0.199	1
CD248	0.00457769	0.329422	0.561	0.348	1
JAG1	0.00476013	-0.265492	0	0.166	1
NDUFA6	0.00477945	0.321086	1	0.89	1
SAT2	0.00478475	-0.448551	0.561	0.685	1
RFX3	0.00479322	-0.351389	0.024	0.205	1
TMEM98	0.00479488	0.345451	0.659	0.442	1
NUF2	0.00485056	0.524545	0.488	0.292	1
TRAK1	0.00501073	0.247759	0.415	0.22	1
UBE2Z	0.00507942	0.344446	0.683	0.499	1
BOLA2B	0.0051215	-0.33149	0.098	0.299	1
BAD	0.00513463	0.32143	0.951	0.836	1
CTPS1	0.0051848	-0.456726	0.366	0.598	1
ACTA2	0.00519205	-1.08281	0.39	0.568	1
SLC35D2	0.00519396	0.353185	0.512	0.33	1
GOLGA2	0.00520241	-0.376741	0.463	0.65	1
RFC2	0.00527449	0.325729	0.61	0.389	1
GSTT2B	0.00533664	-0.409492	0.439	0.634	1
CEP128	0.00537983	0.226805	0.439	0.225	1
CXCL1	0.00550383	-1.4704	0.341	0.527	1
DBR1	0.0055423	0.169409	0.22	0.084	1
SLC45A1	0.00560521	0.061352	0.049	0.005	1
LINC01173	0.00560521	0.061352	0.049	0.005	1
SMAD5-AS1	0.00560521	0.061352	0.049	0.005	1
HCG27	0.00560521	0.061352	0.049	0.005	1
ETV7	0.00560521	0.061352	0.049	0.005	1
PRICKLE4	0.00560521	0.061352	0.049	0.005	1
CRISP2	0.00560521	0.061352	0.049	0.005	1
AL365214.2	0.00560521	0.061352	0.049	0.005	1
AC009403.2	0.00560521	0.061352	0.049	0.005	1
MYORG	0.00560521	0.061352	0.049	0.005	1
AL162426.1	0.00560521	0.061352	0.049	0.005	1
AL135791.1	0.00560521	0.061352	0.049	0.005	1
AL358790.1	0.00560521	0.061352	0.049	0.005	1
GFRA1	0.00560521	0.061352	0.049	0.005	1
AC092828.1	0.00560521	0.061352	0.049	0.005	1
ARNTL2-AS1	0.00560521	0.061352	0.049	0.005	1
AL109628.2	0.00560521	0.061352	0.049	0.005	1
DUOX1	0.00560521	0.061352	0.049	0.005	1
AC093525.4	0.00560521	0.061352	0.049	0.005	1
DOC2A	0.00560521	0.061352	0.049	0.005	1
ST6GALNAC2	0.00560521	0.061352	0.049	0.005	1
ZNF556	0.00560521	0.061352	0.049	0.005	1
CYP2S1	0.00560521	0.061352	0.049	0.005	1
TGFB1	0.00569327	-0.373124	0.512	0.683	1
AC083973.1	0.0057435	0.0576857	0.049	0.005	1
B4GALNT3	0.0057435	0.0540287	0.049	0.005	1
TMEM106C	0.00574782	0.458537	0.659	0.471	1
NKAP	0.00579334	0.267235	0.634	0.43	1
KIF2C	0.00586881	0.305188	0.415	0.217	1
HMGB1	0.00589927	0.350705	1	0.997	1
NUP62	0.00590064	0.269473	0.488	0.281	1
FEN1	0.00594422	0.446118	0.537	0.338	1
HADH	0.00602175	0.330007	0.537	0.358	1
SRSF2	0.00603166	0.335466	0.927	0.854	1
HLCS	0.00607102	0.416202	0.463	0.294	1
COL12A1	0.00608774	0.369457	0.659	0.453	1
ANLN	0.00618003	0.451195	0.61	0.386	1
IFFO1	0.0061838	-0.277364	0.049	0.233	1
AP000763.3	0.0062105	0.115969	0.073	0.013	1
FRMPD4	0.00638931	0.385804	0.561	0.361	1
AC010226.1	0.00648036	0.0835478	0.073	0.013	1
AL139330.1	0.00648036	0.0835478	0.073	0.013	1
ASAP1-IT2	0.00648036	0.0835478	0.073	0.013	1
GNG11	0.00654712	-0.386196	1	0.995	1
OR6F1	0.00664896	0.0726595	0.073	0.013	1
ADAM28	0.00664896	0.0726595	0.073	0.013	1
GRAP2	0.00664896	0.0799092	0.073	0.013	1
ABRACL	0.0066814	-0.355602	0.585	0.77	1
KDELR3	0.00675042	-0.389128	0.585	0.772	1
CTBP2	0.00675448	0.299276	0.707	0.519	1
CCDC107	0.00677302	-0.395229	0.732	0.859	1
NR3C1	0.00687432	-0.253915	0.39	0.65	1
KPNA2	0.00688534	0.267495	0.805	0.611	1
TFG	0.00689858	-0.363199	0.61	0.79	1
PRRT3-AS1	0.00695312	0.118823	0.122	0.033	1
FANCG	0.00697611	0.216636	0.366	0.184	1
VAPB	0.0070191	0.285653	0.463	0.274	1
DPYSL2	0.007044	-0.400242	0.439	0.637	1
PPP3CA	0.00711328	0.304792	0.707	0.519	1
ZNF431	0.00721911	0.227478	0.293	0.138	1
TMEM33	0.00727147	-0.288097	0.098	0.292	1
ZNF771	0.00727635	-0.274459	0.049	0.228	1
POFUT1	0.00732781	0.310056	0.415	0.235	1
ACBD3	0.00735733	-0.394142	0.659	0.801	1
CCNA2	0.00736973	0.244254	0.463	0.261	1
SNX25	0.00741376	-0.301116	0.073	0.258	1
SDHAF3	0.00744227	0.324356	0.488	0.309	1
SPC25	0.00751211	0.486032	0.439	0.266	1
HIST1H1B	0.00759167	0.672615	0.439	0.248	1
FST	0.00785379	0.661956	0.659	0.517	1
SIKE1	0.00788255	-0.305017	0.244	0.468	1
CCDC144NL	0.00793846	0.125983	0.098	0.023	1
GIPC2	0.00798568	0.10147	0.098	0.023	1
PFN4	0.00798568	0.10147	0.098	0.023	1
DDIT4L	0.00798568	0.10147	0.098	0.023	1
SLC25A45	0.00798568	0.10147	0.098	0.023	1
ZNF101	0.00798568	0.10147	0.098	0.023	1
CENPF	0.00807317	0.499956	0.585	0.384	1
ZNF883	0.00814585	0.187806	0.22	0.09	1
VASP	0.00826073	-0.358331	0.512	0.655	1
THAP10	0.00838374	0.196889	0.171	0.061	1
MXD3	0.0084045	0.288895	0.366	0.194	1
ETV6	0.00848577	-0.389334	0.268	0.478	1
MYL9	0.0085126	-0.342958	1	0.992	1
CWF19L1	0.00888521	0.172553	0.268	0.12	1
RAD51AP1	0.00896039	0.241885	0.341	0.176	1
TACC3	0.00899347	0.392636	0.512	0.315	1
ZNF638	0.00909345	-0.407493	0.366	0.529	1
NOTCH1	0.00915281	0.147083	0.195	0.074	1
ALDOA	0.00917319	0.310641	0.561	0.353	1
RTKN2	0.00921011	0.304762	0.39	0.217	1
MCRIP1	0.00943413	0.273133	0.878	0.836	1
TNRC6A	0.00950647	0.289999	0.805	0.614	1
TUBB	0.00960041	0.318521	1	0.997	1
HSPB1	0.00968352	-0.26232	1	0.997	1
OIP5	0.00978785	0.230283	0.244	0.107	1
CAMK2G	0.0098364	0.230753	0.463	0.274	1
TUBB6	0.00986863	0.318468	0.976	0.982	1
ERLEC1	0.0100132	-0.337916	0.854	0.872	1
LINC01588	0.0100895	0.223725	0.244	0.11	1
BAHCC1	0.0101406	0.17623	0.195	0.077	1
HMGB2	0.0101442	0.466453	0.78	0.627	1
NKIRAS1	0.0101444	-0.251	0.049	0.217	1
GLYR1	0.01019	-0.3244	0.22	0.417	1
SCYL1	0.0102179	0.32186	0.61	0.422	1
RAD21	0.010259	0.54729	0.683	0.604	1
ANXA4	0.0103484	-0.369393	0.512	0.683	1
CSTF3	0.0105629	-0.312381	0.268	0.494	1
STAT5B	0.0106257	-0.318362	0.122	0.304	1
TRAF7	0.0106956	0.233573	0.439	0.256	1
CLCF1	0.0107884	-0.264376	0.073	0.248	1
WDFY2	0.010818	0.25122	0.634	0.435	1
HIST1H4C	0.0108556	0.705769	0.976	0.872	1
CACNA1C	0.010857	-0.44055	0.171	0.376	1
TLCD4	0.0109279	0.111699	0.122	0.036	1
SVIP	0.0110111	0.332083	0.659	0.517	1
TOGARAM1	0.0110223	-0.236853	0.024	0.179	1
LSM8	0.01104	0.279159	0.951	0.854	1
GLTP	0.011145	0.292055	0.707	0.488	1
TWF1	0.0111693	0.403197	0.756	0.685	1
DEPDC1	0.0112185	0.340039	0.463	0.271	1
NDUFB11	0.0113037	-0.286647	0.976	0.995	1
STXBP6	0.0113882	0.291174	0.366	0.202	1
PPM1K	0.0114047	-0.272814	0.098	0.284	1
EZH2	0.0114689	0.213059	0.439	0.251	1
HMCN1	0.0114947	-0.325753	0.024	0.176	1
UFSP1	0.0115279	0.104609	0.122	0.036	1
MKI67	0.0115344	0.376956	0.561	0.358	1
SLC33A1	0.0116995	-0.277042	0.098	0.276	1
GLRX	0.0117164	-0.0375613	0.976	0.992	1
TPX2	0.0117175	0.489819	0.585	0.412	1
ENDOG	0.0117627	0.246969	0.659	0.465	1
KIF20B	0.0117736	0.309601	0.561	0.358	1
AC078846.1	0.0118786	0.167743	0.171	0.064	1
LCLAT1	0.0120508	-0.202756	0	0.136	1
LBH	0.0120806	-0.212342	0	0.136	1
TUSC3	0.0120877	-0.276454	0.805	0.898	1
TMEM222	0.0121311	0.236126	0.415	0.238	1
AVPI1	0.0121666	0.228333	0.415	0.24	1
ATL3	0.0122078	0.293322	0.585	0.391	1
PTDSS2	0.0122702	-0.307242	0.098	0.274	1
STIL	0.012354	0.192482	0.293	0.143	1
IFITM2	0.0123849	-0.336197	0.878	0.949	1
C6orf226	0.0124632	-0.279814	0.098	0.274	1
TRIM27	0.0125661	-0.283098	0.171	0.358	1
CCNB1	0.0125819	0.144174	0.561	0.332	1
CENPA	0.0126104	0.293122	0.439	0.261	1
KAT6B	0.0126513	-0.271272	0.195	0.396	1
NBL1	0.0128487	-0.360221	0.293	0.504	1
TRAP1	0.0128792	0.253473	0.512	0.338	1
PCMT1	0.0129254	0.300705	0.976	0.867	1
CPT1C	0.0130296	-0.200118	0.049	0.217	1
CCNB2	0.0132544	0.301217	0.561	0.348	1
ST3GAL1	0.0133064	-0.334101	0.122	0.297	1
RUVBL2	0.0134267	0.298243	0.683	0.499	1
YIF1A	0.013447	-0.294227	0.805	0.921	1
EXOSC10-AS1	0.0134601	0.0978675	0.098	0.026	1
SECISBP2L	0.0136511	0.188651	0.561	0.34	1
SHCBP1	0.0136523	0.425397	0.439	0.276	1
PLAUR	0.0136913	0.257315	1	0.959	1
PLOD3	0.0137299	0.212958	0.683	0.432	1
COPE	0.0137761	-0.25572	1	0.997	1
PCDHGA5	0.0137897	0.0942742	0.098	0.026	1
FOSL1	0.0137942	0.304354	0.707	0.527	1
MUC13	0.0138624	0.0799092	0.073	0.015	1
AL109615.4	0.0138624	0.0799092	0.073	0.015	1
C6orf99	0.0138624	0.0799092	0.073	0.015	1
AC022893.1	0.0138624	0.0799092	0.073	0.015	1
NAPRT	0.0138624	0.0799092	0.073	0.015	1
SLCO1B1	0.0138624	0.0799092	0.073	0.015	1
AC012615.1	0.0138624	0.0799092	0.073	0.015	1
AL117335.1	0.0138624	0.0799092	0.073	0.015	1
PTPRS	0.0139488	0.191377	0.293	0.146	1
RAE1	0.0139894	0.184695	0.488	0.281	1
PJA1	0.0139966	-0.189875	0	0.13	1
LINC01004	0.0141163	0.17322	0.415	0.23	1
STPG4	0.0141259	0.0906899	0.098	0.026	1
MAST1	0.0141259	0.0871144	0.098	0.026	1
AL138733.1	0.0141756	0.0762798	0.073	0.015	1
LINC02725	0.0141756	0.0762798	0.073	0.015	1
APAF1	0.0141964	0.250519	0.39	0.225	1
FOLR3	0.0142198	0.217253	0.366	0.202	1
PHPT1	0.014282	-0.230796	1	0.995	1
TXNDC15	0.0142995	-0.33149	0.463	0.645	1
ALKBH2	0.0143385	-0.271482	0.098	0.269	1
NAPA	0.0144135	-0.29164	0.22	0.417	1
CIP2A	0.0144343	0.44091	0.415	0.281	1
AMPH	0.0144601	0.142726	0.122	0.038	1
SCYL2	0.0146126	0.368115	0.463	0.297	1
BICD2	0.0146814	-0.26151	0.073	0.238	1
DHRS2	0.0147621	-0.321436	0.073	0.243	1
POFUT2	0.0147675	-0.247098	0.073	0.238	1
BACE2	0.0149053	0.135636	0.122	0.038	1
AC079949.3	0.0149145	-0.236853	0.024	0.169	1
WASF2	0.0149447	0.259349	0.829	0.719	1
DNAJC9	0.0150903	0.375035	0.61	0.432	1
EMP2	0.0151342	0.36895	0.61	0.468	1
CRYBG1	0.0152388	0.141468	0.146	0.051	1
ETV3	0.0153499	0.121561	0.146	0.051	1
COL4A2	0.0153794	-0.430554	0.854	0.875	1
MRPL57	0.015414	0.249816	0.976	0.926	1
MYBL2	0.0155986	0.305106	0.341	0.192	1
UNG	0.015626	-0.22961	0.049	0.21	1
DTYMK	0.0157188	0.372869	0.878	0.76	1
PPP5C	0.0157192	0.256208	0.439	0.266	1
DUSP16	0.0157662	0.114575	0.146	0.051	1
LANCL2	0.0158474	0.230701	0.268	0.13	1
SETBP1	0.0158903	0.294115	0.341	0.197	1
H1F0	0.0159522	0.255674	0.61	0.396	1
MPHOSPH10	0.0159674	-0.304753	0.317	0.522	1
RMDN2	0.0159743	0.10815	0.122	0.038	1
AURKA	0.0159824	0.304332	0.439	0.261	1
GRAMD2B	0.0159826	0.209751	0.463	0.281	1
TOP2A	0.0160482	0.342635	0.537	0.35	1
LINC02762	0.016098	0.258709	0.488	0.307	1
TCF19	0.0162144	0.232234	0.317	0.169	1
NUSAP1	0.0162481	0.406673	0.61	0.414	1
RAC3	0.0163504	-0.202756	0	0.125	1
MBOAT1	0.0163791	0.104609	0.122	0.038	1
PCLAF	0.0164085	0.426203	0.805	0.634	1
ATAD1	0.0164547	-0.296724	0.171	0.353	1
TPM2	0.0166468	-0.214676	1	1	1
HMGA1	0.0166516	0.257284	1	0.997	1
APOE	0.0168475	-0.320519	0.049	0.205	1
BICRAL	0.0169316	0.226673	0.39	0.225	1
ATG2A	0.0170172	0.134532	0.171	0.066	1
USP34	0.017139	-0.325063	0.463	0.662	1
VCAN	0.0171588	-0.654135	0.878	0.87	1
BLOC1S6	0.0172861	-0.317852	0.39	0.578	1
DEK	0.0172911	0.305026	0.976	0.921	1
TOP3B	0.0174962	0.131076	0.171	0.066	1
PDSS2	0.0174965	-0.231449	0.146	0.345	1
GTSE1	0.0175272	0.245109	0.488	0.284	1
HIST1H1A	0.0175308	0.457258	0.39	0.228	1
SLC25A36	0.0175502	0.245978	0.537	0.353	1
DMXL2	0.017568	-0.221489	0.024	0.164	1
IL6ST	0.0175748	-0.352027	0.561	0.734	1
STIMATE	0.0176475	-0.232539	0.073	0.233	1
TRIB3	0.0176703	-0.262419	0	0.123	1
NUP58	0.0177816	0.263815	0.488	0.332	1
DNAJC8	0.017789	0.208338	0.976	0.921	1
TMEM165	0.0178774	-0.294015	0.805	0.885	1
BCAP29	0.0179019	0.257673	0.976	0.893	1
DYNC2H1	0.0182236	-0.282051	0.146	0.317	1
CAMK2N1	0.0182589	0.239489	0.561	0.371	1
COL6A1	0.0182976	-0.351611	0.561	0.729	1
MOGS	0.0183166	-0.270089	0.146	0.325	1
TERF2IP	0.0183385	-0.234982	0.488	0.726	1
HCFC2	0.0184515	0.182481	0.366	0.202	1
ALDH4A1	0.0185647	0.200034	0.244	0.118	1
C1R	0.0186073	-0.249992	0.073	0.23	1
MBP	0.0186352	0.144538	0.22	0.097	1
CKAP2	0.0186872	0.311393	0.61	0.427	1
NBPF26	0.0187678	0.148437	0.146	0.054	1
LRFN5	0.0189095	0.489804	0.39	0.22	1
RALGAPA1	0.0189442	-0.292496	0.171	0.355	1
PIP4P2	0.0190638	0.217404	0.634	0.432	1
CCL2	0.0190661	-0.653418	0.341	0.532	1
SULF1	0.0191398	-0.738596	0.244	0.414	1
NTS	0.0191782	0.119617	0.049	0.008	1
PKD2	0.0191853	0.402616	0.634	0.488	1
AC091271.1	0.0192549	0.144948	0.146	0.054	1
AL592295.5	0.0195439	0.0576857	0.049	0.008	1
RGS5	0.0195439	0.0576857	0.049	0.008	1
AL591043.2	0.0195439	0.0576857	0.049	0.008	1
KIAA1614-AS1	0.0195439	0.0576857	0.049	0.008	1
AC011405.1	0.0195439	0.0576857	0.049	0.008	1
AC073349.4	0.0195439	0.0576857	0.049	0.008	1
FAM83A	0.0195439	0.0576857	0.049	0.008	1
OMD	0.0195439	0.0576857	0.049	0.008	1
LOH12CR2	0.0195439	0.0576857	0.049	0.008	1
ESR2	0.0195439	0.0576857	0.049	0.008	1
FAM71D	0.0195439	0.0576857	0.049	0.008	1
GOLGA6L10	0.0195439	0.0576857	0.049	0.008	1
AC007014.1	0.0195439	0.0576857	0.049	0.008	1
AC092287.1	0.0195439	0.0576857	0.049	0.008	1
AC011472.1	0.0195439	0.0576857	0.049	0.008	1
PNMA8A	0.0195439	0.0576857	0.049	0.008	1
LINC00653	0.0195439	0.0576857	0.049	0.008	1
U2AF1L5	0.0195439	0.0576857	0.049	0.008	1
AC003681.1	0.0195439	0.0576857	0.049	0.008	1
NUCKS1	0.0195903	0.28057	1	0.951	1
VASN	0.0196797	-0.321601	0.341	0.524	1
MTOR	0.0196884	-0.230857	0.098	0.274	1
TTK	0.01971	0.301426	0.317	0.171	1
ARHGEF28	0.0197517	0.168664	0.463	0.269	1
CENPE	0.0197932	0.427333	0.463	0.292	1
WDR7	0.0198367	-0.226218	0.073	0.235	1
NELFB	0.0198461	0.278661	0.415	0.258	1
HERC3	0.019898	0.188517	0.341	0.187	1
ZKSCAN1	0.0199129	-0.273507	0.244	0.437	1
AL512353.1	0.0199191	0.0540287	0.049	0.008	1
AC116565.1	0.0199191	0.0540287	0.049	0.008	1
SCART1	0.0199191	0.0540287	0.049	0.008	1
ASGR1	0.0199191	0.0540287	0.049	0.008	1
LAMP5	0.0199191	0.0540287	0.049	0.008	1
AL121601.1	0.0199191	0.0540287	0.049	0.008	1
DTD1	0.0200865	0.258164	0.902	0.872	1
KIF18B	0.0201161	0.282857	0.293	0.151	1
LRRC42	0.0203918	0.269961	0.561	0.427	1
LIAS	0.0204266	0.221051	0.268	0.136	1
NRXN3	0.020442	-0.461216	0.244	0.435	1
HIST1H2BD	0.0204663	0.118823	0.098	0.028	1
ATP2B1	0.0204762	0.276193	0.805	0.772	1
LRRC8A	0.0205847	0.256384	0.366	0.217	1
HIST1H2BB	0.0208105	0.118823	0.098	0.028	1
PITRM1	0.020885	-0.28636	0.122	0.284	1
UBE2H	0.0209047	-0.361237	0.585	0.701	1
VDAC3	0.0209205	0.289459	0.878	0.79	1
VWA8	0.0209322	-0.372609	0.195	0.355	1
SMC2	0.0210147	0.370368	0.634	0.478	1
TNFRSF10D	0.0210408	0.22153	0.488	0.309	1
ARL2	0.0210485	0.266271	0.976	0.895	1
FAM189B	0.0211066	0.210587	0.341	0.192	1
PPIG	0.0211162	0.29379	0.854	0.693	1
ALS2CL	0.0211432	0.0942742	0.098	0.028	1
AC003093.1	0.0211432	0.0942742	0.098	0.028	1
ZNF473	0.0211432	0.0942742	0.098	0.028	1
R3HDM4	0.0211515	0.195574	0.366	0.21	1
NDC80	0.0211762	0.340508	0.39	0.23	1
APBB1	0.0211825	-0.168885	0.024	0.164	1
UQCRQ	0.0212029	-0.178896	1	1	1
CAVIN1	0.0212226	-0.329539	0.951	0.964	1
GCNT1	0.0212498	0.244773	0.366	0.217	1
AC011092.2	0.021385	0.151935	0.122	0.041	1
FNBP1L	0.0214815	-0.226792	0.146	0.338	1
EXOSC8	0.0214848	0.314246	0.634	0.488	1
DDX49	0.0215599	-0.244305	0.22	0.425	1
TXNDC5	0.0215968	-0.356668	0.512	0.645	1
PIGF	0.0216088	-0.292177	0.366	0.542	1
WAS	0.0216168	0.0906899	0.098	0.028	1
POMT1	0.0216679	0.131076	0.171	0.069	1
GLB1	0.0216837	-0.175585	0.098	0.274	1
BABAM1	0.0217627	-0.307921	0.463	0.657	1
CHD3	0.0219311	0.324065	0.61	0.488	1
ZNF146	0.0219554	0.241885	0.39	0.235	1
CRIM1	0.0219567	0.35385	0.976	0.972	1
FUT4	0.0219703	0.10815	0.122	0.041	1
GHDC	0.0219703	0.10815	0.122	0.041	1
ZNF888	0.0219703	0.10815	0.122	0.041	1
SUV39H1	0.0219703	0.10815	0.122	0.041	1
SRSF7	0.0219747	0.32249	1	0.964	1
PGPEP1	0.0220035	-0.170335	0	0.115	1
IFT172	0.0220186	-0.17361	0	0.115	1
APLF	0.0220512	-0.209078	0.024	0.156	1
CNTNAP3B	0.0220527	-0.224144	0.049	0.192	1
UBL4A	0.0221358	0.26924	0.488	0.327	1
AC011603.2	0.0222024	0.152495	0.195	0.084	1
GRPEL2	0.0222511	0.127629	0.171	0.069	1
RNF5	0.0222608	-0.268948	0.244	0.432	1
ATG13	0.0223232	-0.21508	0.049	0.192	1
H2AFV	0.0223335	0.317188	0.951	0.913	1
MIS18BP1	0.0223507	0.360111	0.61	0.486	1
JUN	0.0223571	0.309762	0.659	0.522	1
AL731569.1	0.0224936	0.104609	0.122	0.041	1
RASSF1	0.0225125	0.287025	0.634	0.496	1
TRAM2	0.0225336	-0.314811	0.293	0.478	1
TUBG1	0.0225381	0.339203	0.756	0.668	1
LINC00840	0.0226275	0.241298	0.317	0.176	1
THEM4	0.0227927	-0.26151	0.073	0.223	1
TSTD3	0.0228351	-0.23838	0.122	0.297	1
LINC02492	0.0229813	0.142441	0.195	0.084	1
TRIM6	0.0230269	0.101078	0.122	0.041	1
AP002495.1	0.0232501	0.208222	0.171	0.072	1
DPH6	0.0232882	0.20693	0.39	0.238	1
PAK4	0.0233454	0.16275	0.244	0.118	1
RBM42	0.023448	-0.254582	0.317	0.506	1
NDC1	0.0235714	0.224777	0.268	0.141	1
BIRC5	0.0235816	0.291479	0.683	0.499	1
CATSPERE	0.0237676	0.164279	0.146	0.056	1
INTU	0.0238849	-0.202833	0.024	0.153	1
HDAC4	0.0239773	-0.19026	0.024	0.153	1
OTUD6B	0.0240002	0.27162	0.317	0.184	1
CCN2	0.0240033	-0.770911	0.976	0.957	1
CLK3	0.0240576	-0.256388	0.122	0.281	1
UQCC3	0.0240588	0.259651	0.854	0.691	1
BGN	0.0241229	-0.441036	0.537	0.642	1
SNRNP200	0.0241843	0.302083	0.61	0.455	1
FAM229B	0.0242679	-0.302577	0.366	0.55	1
ARHGAP11B	0.0243447	0.104478	0.293	0.143	1
AC092123.1	0.024359	0.108701	0.073	0.018	1
ARL6IP6	0.0245329	0.336996	0.537	0.399	1
POMP	0.0245599	-0.180758	1	1	1
NARS2	0.0247418	-0.250871	0.122	0.281	1
LMNB2	0.0247512	0.265878	0.488	0.327	1
EXOC5	0.025012	0.279468	0.61	0.465	1
RWDD1	0.0251178	-0.259296	0.878	0.931	1
CCS	0.0254556	-0.288973	0.39	0.583	1
AL589684.1	0.0254959	0.0762798	0.073	0.018	1
AC144652.1	0.0254959	0.0762798	0.073	0.018	1
AL353751.1	0.0254959	0.0762798	0.073	0.018	1
AP002833.1	0.0254959	0.0762798	0.073	0.018	1
TTC25	0.0254959	0.0762798	0.073	0.018	1
AC006213.3	0.0254959	0.0762798	0.073	0.018	1
CARD8-AS1	0.0254959	0.0762798	0.073	0.018	1
PIM2	0.0254959	0.0762798	0.073	0.018	1
TYW1B	0.025612	0.155862	0.195	0.087	1
SNAP23	0.0256316	-0.286635	0.171	0.338	1
CIAO2B	0.0256831	-0.200982	0.951	0.997	1
DNTTIP1	0.0257666	-0.263353	0.268	0.455	1
BTG1	0.025783	0.223725	0.732	0.655	1
ZNF264	0.025896	0.150506	0.171	0.072	1
CKAP2L	0.0259027	0.318268	0.39	0.24	1
PYGB	0.0259135	-0.180758	0.024	0.151	1
DFFB	0.0260022	0.0726595	0.073	0.018	1
SCN11A	0.0260022	0.0726595	0.073	0.018	1
COPG2	0.0260717	-0.209006	0.049	0.187	1
AC012447.1	0.0261071	0.118064	0.146	0.056	1
ZNF236	0.0261761	-0.202906	0.049	0.187	1
RUNX1	0.0261808	0.351838	0.683	0.532	1
ZBTB41	0.0266339	-0.190977	0.049	0.192	1
ABHD17A	0.0266786	0.300311	0.634	0.542	1
HIST1H1C	0.0267399	0.510185	0.585	0.45	1
ACVR2A	0.0267907	0.135778	0.22	0.102	1
UBE2S	0.0270369	0.302861	1	0.995	1
RAB3B	0.027153	0.290499	0.829	0.752	1
BPNT1	0.0272862	-0.226675	0.073	0.217	1
SAMD11	0.0273033	-0.240844	0.146	0.322	1
RGS4	0.0273361	-0.548519	0.439	0.581	1
B4GALT1	0.0274361	-0.301116	0.39	0.558	1
CLSPN	0.0274493	0.269961	0.585	0.402	1
HYAL3	0.0274635	-0.147198	0	0.107	1
SYNM	0.0275003	-0.15716	0	0.107	1
TMEM219	0.0275087	0.201178	0.902	0.87	1
MED25	0.0276666	-0.19656	0.024	0.148	1
ATM	0.0277315	0.231409	0.537	0.376	1
TRIM44	0.0278369	-0.342717	0.439	0.573	1
RAB11B-AS1	0.0278623	0.13009	0.195	0.087	1
SOCS4	0.0278853	-0.273924	0.171	0.335	1
LINC01234	0.027938	0.250519	0.366	0.225	1
ZNF175	0.0279728	-0.264376	0.073	0.215	1
POU2F1	0.0280747	0.225757	0.317	0.179	1
CSAG1	0.0283888	0.19819	0.317	0.169	1
MT-ATP8	0.0285631	-0.0718177	1	0.982	1
NCAPG2	0.0285751	0.27839	0.463	0.297	1
ORAI3	0.0286075	-0.264624	0.122	0.274	1
RNF170	0.0286606	0.266184	0.268	0.146	1
RPAP2	0.0288807	-0.279022	0.195	0.35	1
MBOAT2	0.0289843	0.272695	0.61	0.45	1
CDCA3	0.0290717	0.283485	0.439	0.274	1
COX7A1	0.0291542	-0.294209	0.098	0.261	1
CFAP298	0.029343	-0.29135	0.537	0.703	1
FAM174C	0.0295249	-0.272454	0.756	0.831	1
CAPN5	0.0296536	-0.160465	0	0.105	1
TXNDC16	0.0296536	-0.163762	0	0.105	1
SMARCE1	0.0297075	0.29099	0.78	0.685	1
ABCC3	0.0297922	0.209079	0.293	0.164	1
C5orf17	0.0298342	-0.291597	0.171	0.355	1
NEK10	0.0300562	-0.41101	0.146	0.307	1
PINX1	0.0303283	0.216636	0.317	0.184	1
UBR5	0.0304295	0.400794	0.634	0.476	1
USP38	0.0304434	0.209904	0.22	0.11	1
CASP9	0.030459	0.153937	0.171	0.074	1
TMEM167B	0.0305569	-0.234193	0.122	0.274	1
PPT1	0.030656	-0.188532	0.195	0.373	1
SLC35E2A	0.030665	0.101078	0.122	0.043	1
USP37	0.0306822	-0.244198	0.073	0.212	1
NSD2	0.0308636	0.329708	0.683	0.488	1
AC090409.1	0.0312265	0.148677	0.585	0.379	1
ASNSD1	0.0313324	-0.233598	0.122	0.279	1
DCLRE1A	0.0313466	0.0975546	0.122	0.043	1
NOTCH2NLC	0.0313588	0.0906899	0.098	0.031	1
AL441883.1	0.0313588	0.0906899	0.098	0.031	1
MEIS1	0.0314209	-0.402524	0.439	0.565	1
CDC37	0.0314484	-0.195168	0.732	0.877	1
MRPL28	0.0314589	0.181572	0.951	0.893	1
TRIP6	0.031534	-0.241451	0.439	0.65	1
LINC01184	0.0316054	-0.268948	0.293	0.458	1
CCDC18	0.0316105	0.258355	0.463	0.304	1
CENPI	0.0318175	0.158316	0.293	0.156	1
MRE11	0.0318254	0.146784	0.366	0.21	1
CD163L1	0.0318668	-0.273924	0.171	0.33	1
AC004816.2	0.0319323	-0.15716	0	0.102	1
DIXDC1	0.0319523	-0.307722	0.195	0.35	1
ZNF322	0.0319554	-0.247221	0.146	0.299	1
AFAP1L1	0.0319973	0.147083	0.171	0.074	1
TNFRSF10C	0.0320039	0.0871144	0.098	0.031	1
ANP32B	0.0321318	0.211258	1	0.944	1
LUC7L2	0.0321335	0.247729	0.707	0.583	1
IFITM3	0.0321645	-0.260442	0.976	0.995	1
DNAJC6	0.0323488	-0.177577	0.024	0.143	1
KIAA0930	0.0323492	-0.183933	0.024	0.143	1
DNA2	0.0323633	0.161027	0.22	0.107	1
CRAMP1	0.0324149	-0.174389	0.024	0.143	1
OPTN	0.0324199	0.316268	0.805	0.762	1
MAP2K4	0.0324731	0.234614	0.537	0.407	1
TMUB1	0.0324822	0.318214	0.659	0.54	1
RSPH3	0.0325386	-0.203041	0.073	0.217	1
NR1D2	0.0326468	-0.200484	0.098	0.256	1
LAMTOR3	0.0326523	0.174904	0.537	0.345	1
PPIL4	0.0326986	0.311077	0.707	0.575	1
SYS1	0.0327335	-0.280506	0.171	0.32	1
MEN1	0.0329981	-0.137246	0.024	0.148	1
ME3	0.0330383	0.201561	0.341	0.202	1
ING1	0.0330455	0.140131	0.244	0.123	1
ITPR2	0.0332752	-0.341	0.415	0.542	1
XAGE5	0.0333255	0.0729005	0.098	0.031	1
PRKCSH	0.0334244	0.224462	0.634	0.468	1
TNFRSF12A	0.0334901	0.264431	1	1	1
UBE2E3	0.0341801	0.224521	0.878	0.852	1
GLRX5	0.0341908	0.202449	0.902	0.737	1
HARS	0.0341943	-0.319417	0.488	0.611	1
EMILIN2	0.0342448	0.111094	0.146	0.059	1
ZNF585B	0.0342448	0.111094	0.146	0.059	1
KIZ-AS1	0.0343273	-0.140519	0	0.1	1
IFT57	0.0343506	-0.242147	0.415	0.606	1
GPR173	0.0343975	-0.15716	0	0.1	1
GATA6	0.0344399	-0.17361	0	0.1	1
TUBB4B	0.0345356	0.253202	1	0.992	1
MRPS14	0.034587	-0.293522	0.585	0.724	1
EVI5L	0.0348238	0.171011	0.195	0.092	1
CTF1	0.0349323	-0.177577	0.024	0.141	1
IER2	0.0349699	0.305785	0.927	0.808	1
GRIK2	0.0351669	-0.360784	0.268	0.435	1
XPNPEP1	0.0352462	-0.185861	0.098	0.248	1
NT5C3B	0.0353584	-0.277402	0.561	0.706	1
NONO	0.0353706	0.225276	0.78	0.68	1
AC105383.1	0.0354164	0.11999	0.195	0.09	1
CEP55	0.0355847	0.242384	0.463	0.289	1
HEXB	0.0358664	0.262751	0.585	0.419	1
TYMS	0.0358754	0.38029	0.683	0.552	1
ESM1	0.035906	0.334697	0.732	0.616	1
TIMM17A	0.0360381	-0.26608	0.683	0.783	1
HERPUD1	0.0360997	-0.284275	0.537	0.719	1
SP4	0.0361151	0.13009	0.171	0.074	1
MAP3K13	0.0362526	-0.29722	0.463	0.614	1
FBLN2	0.0362741	-0.322719	0.268	0.43	1
METTL9	0.0364933	-0.262059	0.634	0.78	1
SERF2	0.0365309	-0.183127	1	1	1
MFSD2A	0.0365457	0.129145	0.22	0.107	1
SLC24A3	0.0365723	-0.190627	0.024	0.143	1
C8orf82	0.0366222	0.275499	0.39	0.266	1
WDR70	0.0366805	0.295159	0.561	0.399	1
LMAN1	0.0367702	-0.250509	1	0.99	1
TNIP1	0.0368189	-0.274265	0.293	0.476	1
OSBP	0.0368905	-0.243304	0.195	0.366	1
LIN7C	0.0369804	-0.197907	0.146	0.312	1
GIGYF2	0.0370273	0.242518	0.634	0.473	1
OGA	0.0370631	0.112548	0.561	0.353	1
METTL5	0.0372356	0.222919	0.878	0.831	1
MMUT	0.0373196	-0.185861	0.098	0.246	1
PXMP2	0.0373719	0.340583	0.61	0.506	1
IWS1	0.0373822	0.257356	0.683	0.555	1
KIF9	0.0374934	-0.236493	0.195	0.361	1
TLCD1	0.0375145	-0.193707	0.049	0.174	1
SMC6	0.0375504	0.302382	0.61	0.491	1
AURKB	0.0375991	0.288127	0.415	0.269	1
AL359764.3	0.0376365	0.144948	0.122	0.046	1
TRAM1	0.0376931	-0.277309	0.683	0.826	1
CDCA2	0.0377167	0.195441	0.39	0.23	1
NR2C1	0.0377906	-0.161565	0.024	0.138	1
PACSIN2	0.0377952	0.242104	0.61	0.455	1
CAPZB	0.037805	-0.21508	1	0.99	1
PSMB3	0.0379043	0.181395	1	0.995	1
CD33	0.0379535	-0.244198	0.073	0.205	1
NDUFAB1	0.0380616	-0.178267	1	0.992	1
CENPO	0.0380653	0.170646	0.268	0.146	1
FZR1	0.0381585	0.259302	0.341	0.22	1
ABRAXAS1	0.0382586	0.299276	0.366	0.235	1
ADAMTS6	0.0384271	0.461278	0.927	0.877	1
HADHB	0.0384973	-0.241451	0.463	0.645	1
ZNF134	0.038555	0.125067	0.122	0.046	1
CCBE1	0.0387455	0.438058	0.78	0.66	1
SRSF1	0.0389912	0.264648	0.561	0.404	1
FPGS	0.0392063	-0.197907	0.146	0.309	1
PHACTR4	0.0392364	0.253473	0.683	0.496	1
PPP1R18	0.0393812	-0.243263	0.317	0.481	1
PLD2	0.0397874	-0.133809	0	0.095	1
ZNF566	0.0398084	0.101078	0.122	0.046	1
ST3GAL5	0.0398598	-0.153847	0	0.095	1
BCHE	0.0398598	-0.150526	0	0.095	1
CYB5A	0.0400005	0.203183	0.561	0.404	1
AC104123.1	0.0400113	-0.159466	0.024	0.141	1
METTL21A	0.0400291	0.136929	0.268	0.143	1
LTBP1	0.040037	-0.278775	0.463	0.593	1
MRPS25	0.0401042	0.242584	0.683	0.606	1
ACAT2	0.0401342	0.247789	0.659	0.529	1
ZDHHC2	0.0401443	0.276483	0.561	0.417	1
RBBP7	0.0401784	0.287689	0.878	0.714	1
CHD6	0.0401824	-0.229849	0.146	0.304	1
OSBPL8	0.0402186	-0.289111	0.634	0.816	1
CDC42EP4	0.0404126	0.156251	0.244	0.128	1
HAS2	0.0405515	0.311648	0.659	0.491	1
AP001816.1	0.0406256	-0.161565	0.024	0.136	1
IQCH-AS1	0.0406256	-0.161565	0.024	0.136	1
AC138150.1	0.0406433	0.0975546	0.122	0.046	1
EIF1AX	0.0407018	0.216213	1	0.957	1
GALK1	0.0407382	-0.322091	0.585	0.714	1
SYCE2	0.040802	0.10147	0.073	0.02	1
RRM2	0.0408071	0.22134	0.61	0.419	1
RILPL1	0.0408291	-0.235353	0.22	0.389	1
HINT3	0.0408737	-0.151871	0.024	0.136	1
ANKRD28	0.0408786	0.302686	0.537	0.414	1
EDF1	0.0408957	-0.152633	1	1	1
ARL4A	0.0409176	0.416323	0.512	0.399	1
CCAR2	0.0412502	0.11999	0.195	0.092	1
GLUL	0.0413286	0.148037	0.439	0.279	1
MRPL27	0.0415288	0.208598	0.902	0.931	1
MOSMO	0.0415836	0.272695	0.61	0.476	1
ZNF37A	0.041636	-0.19738	0.098	0.24	1
SLC44A2	0.0416776	-0.174932	0.098	0.248	1
SPEF2	0.0417518	0.14985	0.098	0.033	1
JAM2	0.0417748	0.201005	0.244	0.133	1
C5orf56	0.0418968	-0.15746	0.049	0.176	1
BRIX1	0.0419826	0.238043	0.683	0.524	1
AP3B2	0.041993	0.0726595	0.073	0.02	1
ZNF606	0.041993	0.0726595	0.073	0.02	1
AL109824.1	0.041993	0.0726595	0.073	0.02	1
USP51	0.041993	0.0726595	0.073	0.02	1
GALM	0.0420632	0.117336	0.171	0.077	1
DMD	0.0421641	-0.362517	0.098	0.235	1
TMPO	0.0421641	0.389338	0.634	0.481	1
HNRNPF	0.0421963	0.30609	0.951	0.882	1
PGM1	0.0424755	-0.211302	0.171	0.325	1
NDUFB7	0.0425062	-0.203656	1	0.987	1
BLID	0.0427335	0.0690482	0.073	0.02	1
G2E3-AS1	0.0427335	0.0690482	0.073	0.02	1
SNAI1	0.0427335	0.0690482	0.073	0.02	1
ST3GAL2	0.0427785	0.118953	0.341	0.194	1
IKZF5	0.0428068	-0.127067	0	0.092	1
MFSD6	0.0428481	-0.133809	0	0.092	1
FAM50A	0.0428682	0.154887	0.829	0.903	1
RAN	0.042914	0.222548	1	1	1
SELENBP1	0.0429324	0.204071	0.366	0.23	1
XPA	0.0429756	0.310641	0.463	0.353	1
GRAMD1C	0.0430526	0.113921	0.171	0.077	1
ZDHHC8	0.0430976	0.159737	0.293	0.166	1
CCDC28A	0.0431135	0.147273	0.293	0.164	1
CIAO2A	0.0431611	0.343024	0.732	0.624	1
2023-03-03	0.0432375	0.214479	0.512	0.366	1
TMEM147	0.0432878	0.141964	0.878	0.854	1
MIR646HG	0.0433011	0.120759	0.146	0.061	1
CNST	0.0433287	-0.208747	0.122	0.269	1
SPATC1L	0.0433419	-0.22496	0.171	0.317	1
BCL2A1	0.0433603	0.111699	0.098	0.033	1
SNRPD1	0.0433756	0.194771	1	0.974	1
RBMS2	0.0433856	0.167206	0.537	0.373	1
JARID2	0.043468	-0.288556	0.268	0.409	1
CDC16	0.0435699	-0.240194	0.22	0.384	1
MPP5	0.0435716	0.164705	0.488	0.32	1
NCK1	0.0435849	-0.300514	0.244	0.379	1
CFAP300	0.0436176	-0.190627	0.049	0.169	1
CDC45	0.0437024	0.292643	0.415	0.269	1
DNAJC21	0.0437753	-0.260075	0.659	0.76	1
TRIM52-AS1	0.0439345	-0.151871	0.024	0.133	1
CHMP7	0.0439854	0.179964	0.293	0.169	1
AC103591.3	0.0440075	0.0871956	0.049	0.01	1
AL031073.2	0.0440075	0.0871956	0.049	0.01	1
NMRK1	0.0440287	0.192591	0.341	0.21	1
PDHX	0.0441621	-0.197189	0.098	0.233	1
SC5D	0.0441621	-0.200118	0.098	0.233	1
CPED1	0.0442298	0.307693	0.732	0.68	1
CPNE1	0.0443396	-0.262903	0.463	0.616	1
LRTOMT	0.0443573	0.0871144	0.098	0.033	1
WDR90	0.0443573	0.0871144	0.098	0.033	1
ZNF500	0.0443573	0.0871144	0.098	0.033	1
ICAM5	0.0443573	0.0871144	0.098	0.033	1
Z82215.1	0.0443573	0.0871144	0.098	0.033	1
GSK3B	0.0444108	0.296177	0.634	0.504	1
DDHD1	0.0445688	0.20372	0.293	0.169	1
TUBA1B	0.0448087	0.281525	1	0.995	1
MARS	0.0449368	-0.229849	0.146	0.299	1
AL645465.1	0.045086	0.107116	0.171	0.077	1
CD24	0.0451613	-0.267099	0.024	0.13	1
TRBC2	0.0451763	0.266412	0.171	0.082	1
AC108047.1	0.0451987	0.0835478	0.098	0.033	1
HELLPAR	0.0451987	0.0835478	0.098	0.033	1
TRIM69	0.0451987	0.0835478	0.098	0.033	1
ZGLP1	0.0451987	0.0835478	0.098	0.033	1
C2CD2	0.0452043	-0.194988	0.122	0.274	1
TGFBI	0.04526	0.294965	0.585	0.43	1
CXorf56	0.0453159	0.132457	0.195	0.095	1
TNFRSF1B	0.0453845	0.0540287	0.049	0.01	1
LDLRAD2	0.0453845	0.0540287	0.049	0.01	1
AC095032.1	0.0453845	0.0540287	0.049	0.01	1
AL390195.1	0.0453845	0.0540287	0.049	0.01	1
ZNF385B	0.0453845	0.0540287	0.049	0.01	1
AC025614.2	0.0453845	0.0540287	0.049	0.01	1
AC105285.1	0.0453845	0.0540287	0.049	0.01	1
AC099522.2	0.0453845	0.0540287	0.049	0.01	1
AC106791.1	0.0453845	0.0540287	0.049	0.01	1
ADRA1B	0.0453845	0.0540287	0.049	0.01	1
OGN	0.0453845	0.0540287	0.049	0.01	1
AIF1L	0.0453845	0.0540287	0.049	0.01	1
AP006623.1	0.0453845	0.0540287	0.049	0.01	1
GPR19	0.0453845	0.0540287	0.049	0.01	1
AGAP2	0.0453845	0.0540287	0.049	0.01	1
AC020765.2	0.0453845	0.0540287	0.049	0.01	1
SPAG5-AS1	0.0453845	0.0540287	0.049	0.01	1
AC015802.6	0.0453845	0.0540287	0.049	0.01	1
AC145207.2	0.0453845	0.0540287	0.049	0.01	1
ZNF442	0.0453845	0.0540287	0.049	0.01	1
AC012313.1	0.0453845	0.0540287	0.049	0.01	1
SHTN1	0.0454875	0.176657	0.439	0.279	1
IFIT1	0.0457269	-0.227153	0.049	0.166	1
CIT	0.0458703	0.194579	0.341	0.21	1
COG2	0.0460437	-0.180067	0.098	0.238	1
TRPV4	0.0460522	0.07999	0.098	0.033	1
KCTD8	0.0460909	0.0467424	0.049	0.01	1
AL358777.1	0.0460909	0.0503809	0.049	0.01	1
SNAP25-AS1	0.0460909	0.0503809	0.049	0.01	1
XKRX	0.0460909	0.0503809	0.049	0.01	1
AC010618.3	0.0461363	-0.137168	0	0.09	1
ZNF677	0.0461542	-0.140519	0	0.09	1
MRNIP	0.0462398	0.119252	0.22	0.11	1
SLC25A21	0.0462703	0.151935	0.122	0.049	1
ZNF426	0.0463953	0.153013	0.244	0.13	1
HMOX2	0.046521	-0.284492	0.439	0.586	1
EIF3J	0.0466656	-0.280294	0.707	0.785	1
EPG5	0.046762	0.235027	0.463	0.325	1
IFI6	0.0467747	0.299655	0.707	0.591	1
AC013565.1	0.0468053	0.0467424	0.049	0.01	1
PDK1	0.046806	-0.164781	0.024	0.13	1
DRAM2	0.0468467	-0.14904	0.098	0.238	1
AC046134.2	0.0469181	0.0729005	0.098	0.033	1
LRRC49	0.0470025	-0.240516	0.073	0.205	1
KAT8	0.0470036	-0.127617	0.024	0.136	1
CACNG8	0.0470538	0.190788	0.512	0.353	1
SND1	0.0471108	-0.32013	0.585	0.731	1
SLC25A29	0.0472109	-0.158341	0.024	0.13	1
ZBTB17	0.0472782	0.169157	0.268	0.151	1
TMEM63A	0.0472782	0.169157	0.268	0.151	1
TCEAL1	0.0473039	-0.194753	0.122	0.266	1
IFIT5	0.0474573	-0.222605	0.146	0.286	1
NBDY	0.0474945	-0.206975	0.805	0.893	1
FBXO33	0.0476383	0.149781	0.244	0.13	1
FAM111A	0.0476789	0.410611	0.439	0.325	1
ERCC6L	0.04792	0.22317	0.195	0.1	1
FNIP1	0.0479793	0.167316	0.463	0.302	1
PHLDA2	0.0481356	0.18642	1	1	1
ARHGEF9	0.0482013	-0.191632	0.098	0.235	1
MRPS18B	0.0483327	-0.260055	0.512	0.616	1
LINC01943	0.0484556	-0.214487	0.073	0.207	1
RPS12	0.0484601	-0.0947734	1	1	1
WRN	0.0485103	-0.259398	0.22	0.376	1
AC044810.2	0.0485176	-0.221129	0.049	0.164	1
GNE	0.0485604	0.221624	0.268	0.159	1
CDK10	0.0485804	0.181523	0.488	0.33	1
CASC4	0.0486047	0.25174	0.732	0.619	1
TTC8	0.0486094	0.210404	0.439	0.297	1
CARHSP1	0.0486295	0.223981	0.951	0.939	1
UGDH	0.0486847	-0.273886	0.415	0.573	1
ATPSCKMT	0.048716	0.202425	0.341	0.21	1
POLR3G	0.0488254	0.241759	0.61	0.455	1
PGM2L1	0.04897	0.134532	0.146	0.064	1
ZNF460	0.04897	0.134532	0.146	0.064	1
SPA17	0.0489832	-0.21757	0.098	0.228	1
ANXA10	0.0489949	-0.196989	0.049	0.169	1
HMMR	0.0490243	0.287462	0.488	0.327	1
HSPA8	0.0490819	0.287649	1	0.997	1
NCOR2	0.0491689	0.239118	0.732	0.588	1
PTRH1	0.0492607	-0.240194	0.244	0.396	1
FAM210B	0.0493064	-0.178478	0.195	0.363	1
TRMU	0.0495075	0.167358	0.439	0.286	1
ELOA	0.0495835	-0.23838	0.171	0.309	1
IFT52	0.0495855	-0.246373	0.171	0.309	1
PAIP2	0.049632	-0.253223	0.78	0.824	1
PURPL	0.0497427	-0.189875	0	0.087	1
UTP18	0.0497787	-0.205959	0.244	0.425	1
ARHGAP12	0.0497923	-0.194753	0.122	0.263	1
BDNF	0.0498105	-0.40328	0.634	0.703	1
DYNC1I1	0.0498379	0.157376	0.146	0.064	1
NXN	0.0498842	0.179472	0.585	0.427	1
GTF2H2C	0.0499097	0.154409	0.22	0.115	1
TPRG1L	0.0500142	-0.187541	0.049	0.164	1
UBP1	0.0501405	0.18882	0.366	0.228	1
DCAF5	0.050218	-0.220145	0.122	0.256	1
ACER3	0.0503148	0.243349	0.463	0.338	1
ZNF138	0.050349	0.145785	0.195	0.097	1
AL139289.2	0.0503553	0.0650277	0.024	0.003	1
AC096637.2	0.0503553	0.0650277	0.024	0.003	1
AC112907.3	0.0503553	0.0650277	0.024	0.003	1
SLC7A11-AS1	0.0503553	0.0650277	0.024	0.003	1
VCX3B	0.0503553	0.158649	0.024	0.003	1
RGN	0.0503553	0.0650277	0.024	0.003	1
CLSTN3	0.0503861	-0.164781	0.024	0.128	1
COL4A1	0.0506919	-0.432152	0.805	0.836	1
PSIP1	0.0507087	0.333099	0.78	0.706	1
ZNF414	0.0508979	-0.178879	0.073	0.197	1
HES5	0.0510158	0.0310804	0.024	0.003	1
AL121992.1	0.0510158	0.0310804	0.024	0.003	1
GRHL3	0.0510158	0.0310804	0.024	0.003	1
AL049795.2	0.0510158	0.0310804	0.024	0.003	1
AL513220.1	0.0510158	0.0310804	0.024	0.003	1
IL12RB2	0.0510158	0.0310804	0.024	0.003	1
ABCA4	0.0510158	0.0310804	0.024	0.003	1
AC092802.4	0.0510158	0.0310804	0.024	0.003	1
PLPPR5	0.0510158	0.0310804	0.024	0.003	1
TBX15	0.0510158	0.0310804	0.024	0.003	1
AL450992.2	0.0510158	0.0310804	0.024	0.003	1
AL139011.1	0.0510158	0.0310804	0.024	0.003	1
AL353708.3	0.0510158	0.0310804	0.024	0.003	1
SMG7-AS1	0.0510158	0.0310804	0.024	0.003	1
AL713852.1	0.0510158	0.0310804	0.024	0.003	1
BRINP3	0.0510158	0.0310804	0.024	0.003	1
TMEM81	0.0510158	0.0310804	0.024	0.003	1
LINC01354	0.0510158	0.0310804	0.024	0.003	1
LINC00211	0.0510158	0.0310804	0.024	0.003	1
CYP1B1-AS1	0.0510158	0.0310804	0.024	0.003	1
LINC01793	0.0510158	0.0310804	0.024	0.003	1
AC016747.3	0.0510158	0.0310804	0.024	0.003	1
AC012370.2	0.0510158	0.0310804	0.024	0.003	1
LINC02831	0.0510158	0.0310804	0.024	0.003	1
LINC01291	0.0510158	0.0310804	0.024	0.003	1
LRRTM4	0.0510158	0.0310804	0.024	0.003	1
AC009309.1	0.0510158	0.0310804	0.024	0.003	1
REEP1	0.0510158	0.0310804	0.024	0.003	1
AC010978.1	0.0510158	0.0310804	0.024	0.003	1
AC092620.1	0.0510158	0.0310804	0.024	0.003	1
DLX2-DT	0.0510158	0.0310804	0.024	0.003	1
FSIP2-AS1	0.0510158	0.0310804	0.024	0.003	1
AC097717.1	0.0510158	0.0310804	0.024	0.003	1
AC007163.1	0.0510158	0.0310804	0.024	0.003	1
GPBAR1	0.0510158	0.0310804	0.024	0.003	1
LINC01937	0.0510158	0.0310804	0.024	0.003	1
AC133528.1	0.0510158	0.0310804	0.024	0.003	1
CNTN4	0.0510158	0.0310804	0.024	0.003	1
SRGAP3	0.0510158	0.0310804	0.024	0.003	1
AC026191.1	0.0510158	0.0310804	0.024	0.003	1
XIRP1	0.0510158	0.0310804	0.024	0.003	1
TNNC1	0.0510158	0.0310804	0.024	0.003	1
ITIH3	0.0510158	0.0310804	0.024	0.003	1
ITIH4	0.0510158	0.0310804	0.024	0.003	1
LINC01990	0.0510158	0.0310804	0.024	0.003	1
ZBTB20-AS1	0.0510158	0.0310804	0.024	0.003	1
AC079848.1	0.0510158	0.0310804	0.024	0.003	1
ERICH6	0.0510158	0.0310804	0.024	0.003	1
AC131235.2	0.0510158	0.0310804	0.024	0.003	1
RTP4	0.0510158	0.0310804	0.024	0.003	1
LINC01587	0.0510158	0.0310804	0.024	0.003	1
AC108519.1	0.0510158	0.0310804	0.024	0.003	1
CPEB2-DT	0.0510158	0.0310804	0.024	0.003	1
GRXCR1	0.0510158	0.0310804	0.024	0.003	1
OCIAD1-AS1	0.0510158	0.0310804	0.024	0.003	1
AC097522.2	0.0510158	0.0310804	0.024	0.003	1
AC110611.1	0.0510158	0.0310804	0.024	0.003	1
AC110615.1	0.0510158	0.0310804	0.024	0.003	1
LINC01094	0.0510158	0.0310804	0.024	0.003	1
AC083795.2	0.0510158	0.0310804	0.024	0.003	1
AC093879.1	0.0510158	0.0310804	0.024	0.003	1
ENPP6	0.0510158	0.0310804	0.024	0.003	1
AC113355.1	0.0510158	0.0310804	0.024	0.003	1
AC034223.2	0.0510158	0.0310804	0.024	0.003	1
C7	0.0510158	0.0310804	0.024	0.003	1
NIM1K	0.0510158	0.0310804	0.024	0.003	1
AC025175.1	0.0510158	0.0310804	0.024	0.003	1
LINC02115	0.0510158	0.0310804	0.024	0.003	1
AC093535.1	0.0510158	0.0310804	0.024	0.003	1
DND1	0.0510158	0.0310804	0.024	0.003	1
PCDHGA2	0.0510158	0.0310804	0.024	0.003	1
SPINK7	0.0510158	0.0310804	0.024	0.003	1
SERPINB9P1	0.0510158	0.0310804	0.024	0.003	1
TMEM170B	0.0510158	0.0310804	0.024	0.003	1
HIST1H4A	0.0510158	0.0310804	0.024	0.003	1
AL645939.5	0.0510158	0.0310804	0.024	0.003	1
AL355353.1	0.0510158	0.0310804	0.024	0.003	1
AL360175.1	0.0510158	0.0310804	0.024	0.003	1
AL512427.2	0.0510158	0.0310804	0.024	0.003	1
AL359715.3	0.0510158	0.0310804	0.024	0.003	1
Z98200.1	0.0510158	0.0310804	0.024	0.003	1
AL356311.1	0.0510158	0.0310804	0.024	0.003	1
RBAKDN	0.0510158	0.0310804	0.024	0.003	1
AC018648.1	0.0510158	0.0310804	0.024	0.003	1
AC005081.1	0.0510158	0.0310804	0.024	0.003	1
AC005050.1	0.0510158	0.0310804	0.024	0.003	1
TSPAN33	0.0510158	0.0310804	0.024	0.003	1
AC069185.1	0.0510158	0.0310804	0.024	0.003	1
AC026979.3	0.0510158	0.0310804	0.024	0.003	1
AC021321.1	0.0510158	0.0310804	0.024	0.003	1
LINC01607	0.0510158	0.0310804	0.024	0.003	1
AC036214.1	0.0510158	0.0310804	0.024	0.003	1
AC079209.1	0.0510158	0.0310804	0.024	0.003	1
MAL2	0.0510158	0.0310804	0.024	0.003	1
RLN1	0.0510158	0.0310804	0.024	0.003	1
DMRTA1	0.0510158	0.0310804	0.024	0.003	1
AL355377.3	0.0510158	0.0310804	0.024	0.003	1
BX664727.3	0.0510158	0.0310804	0.024	0.003	1
BX088651.2	0.0510158	0.0310804	0.024	0.003	1
C8G	0.0510158	0.0310804	0.024	0.003	1
AL392086.3	0.0510158	0.0310804	0.024	0.003	1
AL607028.1	0.0510158	0.0310804	0.024	0.003	1
ST8SIA6	0.0510158	0.0310804	0.024	0.003	1
AL117336.1	0.0510158	0.0310804	0.024	0.003	1
AL442003.1	0.0510158	0.0310804	0.024	0.003	1
AL596223.1	0.0510158	0.0310804	0.024	0.003	1
AC010789.2	0.0510158	0.0310804	0.024	0.003	1
AL137025.1	0.0510158	0.0310804	0.024	0.003	1
AC005871.2	0.0510158	0.0310804	0.024	0.003	1
TEX36	0.0510158	0.0310804	0.024	0.003	1
AC108448.3	0.0510158	0.0310804	0.024	0.003	1
AC090587.1	0.0510158	0.0310804	0.024	0.003	1
LINC02749	0.0510158	0.0310804	0.024	0.003	1
AC079296.1	0.0510158	0.0310804	0.024	0.003	1
CSRP3-AS1	0.0510158	0.0310804	0.024	0.003	1
LINC02716	0.0510158	0.0310804	0.024	0.003	1
TMEM262	0.0510158	0.0310804	0.024	0.003	1
AP003119.2	0.0510158	0.0310804	0.024	0.003	1
AP002383.2	0.0510158	0.0310804	0.024	0.003	1
MMP3	0.0510158	0.0310804	0.024	0.003	1
HSPB2	0.0510158	0.0310804	0.024	0.003	1
LINC02763	0.0510158	0.0310804	0.024	0.003	1
NXPE1	0.0510158	0.0310804	0.024	0.003	1
FXYD2	0.0510158	0.0310804	0.024	0.003	1
ADAMTS20	0.0510158	0.0310804	0.024	0.003	1
AC025030.2	0.0510158	0.0310804	0.024	0.003	1
NFE2	0.0510158	0.0310804	0.024	0.003	1
AC124784.1	0.0510158	0.0310804	0.024	0.003	1
OTOGL	0.0510158	0.0310804	0.024	0.003	1
AC126178.1	0.0510158	0.0310804	0.024	0.003	1
AC016152.1	0.0510158	0.0310804	0.024	0.003	1
ANO4	0.0510158	0.0310804	0.024	0.003	1
AC078880.3	0.0510158	0.0310804	0.024	0.003	1
AC026367.1	0.0510158	0.0310804	0.024	0.003	1
THRIL	0.0510158	0.0310804	0.024	0.003	1
AL391560.2	0.0510158	0.0310804	0.024	0.003	1
LINC00402	0.0510158	0.0310804	0.024	0.003	1
POTEG	0.0510158	0.0310804	0.024	0.003	1
AL136295.2	0.0510158	0.0310804	0.024	0.003	1
AL096870.6	0.0510158	0.0310804	0.024	0.003	1
AL135978.2	0.0510158	0.0310804	0.024	0.003	1
AL691403.2	0.0510158	0.0310804	0.024	0.003	1
AC007686.3	0.0510158	0.0310804	0.024	0.003	1
CCDC88C	0.0510158	0.0310804	0.024	0.003	1
OTUD7A	0.0510158	0.0310804	0.024	0.003	1
AC123768.3	0.0510158	0.0310804	0.024	0.003	1
AC023908.1	0.0510158	0.0310804	0.024	0.003	1
SLC12A1	0.0510158	0.0310804	0.024	0.003	1
AC023355.1	0.0510158	0.0310804	0.024	0.003	1
AC084757.4	0.0510158	0.0310804	0.024	0.003	1
AC023906.4	0.0510158	0.0310804	0.024	0.003	1
AC013564.1	0.0510158	0.0310804	0.024	0.003	1
AC105339.6	0.0510158	0.0310804	0.024	0.003	1
IDH2-DT	0.0510158	0.0310804	0.024	0.003	1
PDIA2	0.0510158	0.0310804	0.024	0.003	1
AL022341.1	0.0510158	0.0310804	0.024	0.003	1
Z92544.2	0.0510158	0.0310804	0.024	0.003	1
PRSS27	0.0510158	0.0310804	0.024	0.003	1
GLIS2-AS1	0.0510158	0.0310804	0.024	0.003	1
AC092338.2	0.0510158	0.0310804	0.024	0.003	1
AC008915.1	0.0510158	0.0310804	0.024	0.003	1
AC009133.2	0.0510158	0.0310804	0.024	0.003	1
SLX1A	0.0510158	0.0310804	0.024	0.003	1
SLC12A3	0.0510158	0.0310804	0.024	0.003	1
AC044802.2	0.0510158	0.0310804	0.024	0.003	1
AC125793.1	0.0510158	0.0310804	0.024	0.003	1
AC009119.1	0.0510158	0.0310804	0.024	0.003	1
NECAB2	0.0510158	0.0310804	0.024	0.003	1
AC138028.1	0.0510158	0.0310804	0.024	0.003	1
AC087501.4	0.0510158	0.0310804	0.024	0.003	1
TMEM238L	0.0510158	0.0310804	0.024	0.003	1
GRB7	0.0510158	0.0310804	0.024	0.003	1
HCRT	0.0510158	0.0310804	0.024	0.003	1
AC103702.1	0.0510158	0.0310804	0.024	0.003	1
AC011990.1	0.0510158	0.0310804	0.024	0.003	1
EVPL	0.0510158	0.0310804	0.024	0.003	1
AC024361.2	0.0510158	0.0310804	0.024	0.003	1
AC103987.2	0.0510158	0.0310804	0.024	0.003	1
OR7D2	0.0510158	0.0310804	0.024	0.003	1
HSH2D	0.0510158	0.0310804	0.024	0.003	1
FXYD1	0.0510158	0.0310804	0.024	0.003	1
DKKL1	0.0510158	0.0310804	0.024	0.003	1
AC010320.2	0.0510158	0.0310804	0.024	0.003	1
AC008735.2	0.0510158	0.0310804	0.024	0.003	1
UBOX5-AS1	0.0510158	0.0310804	0.024	0.003	1
AL049539.1	0.0510158	0.0310804	0.024	0.003	1
TP53TG5	0.0510158	0.0310804	0.024	0.003	1
AL133342.1	0.0510158	0.0310804	0.024	0.003	1
MTRNR2L3	0.0510158	0.0310804	0.024	0.003	1
CU634019.1	0.0510158	0.0310804	0.024	0.003	1
AP001605.1	0.0510158	0.0310804	0.024	0.003	1
IL10RB-DT	0.0510158	0.0310804	0.024	0.003	1
LINC00649	0.0510158	0.0310804	0.024	0.003	1
BRWD1-AS2	0.0510158	0.0310804	0.024	0.003	1
LINC00334	0.0510158	0.0310804	0.024	0.003	1
TUBA8	0.0510158	0.0310804	0.024	0.003	1
Z93930.3	0.0510158	0.0310804	0.024	0.003	1
AL121672.1	0.0510158	0.0310804	0.024	0.003	1
GLRA2	0.0510158	0.0310804	0.024	0.003	1
AC131011.1	0.0510158	0.0310804	0.024	0.003	1
SPIN2A	0.0510158	0.0310804	0.024	0.003	1
MZT1	0.0510345	0.265546	0.707	0.54	1
TUBB3	0.0510584	-0.243181	0.829	0.882	1
PTN	0.0510823	0.274165	0.878	0.798	1
RNF166	0.0511877	0.161388	0.293	0.171	1
BMS1	0.0511958	0.235551	0.585	0.45	1
MTREX	0.0512594	0.190632	0.537	0.386	1
SWI5	0.0515024	-0.283073	0.756	0.818	1
SPAG9	0.051514	-0.27926	0.512	0.642	1
SPC24	0.0515197	0.216147	0.366	0.238	1
PAPPA2	0.0516847	0.0274047	0.024	0.003	1
AC011370.1	0.0516847	0.0274047	0.024	0.003	1
NRN1	0.0516847	0.0274047	0.024	0.003	1
AC099506.1	0.0516847	0.0274047	0.024	0.003	1
DNAH9	0.0516847	0.0274047	0.024	0.003	1
MAGEB2	0.0516847	0.0274047	0.024	0.003	1
TFB2M	0.0517353	0.136015	0.341	0.202	1
CEP152	0.0517375	-0.214676	0.098	0.225	1
GEMIN2	0.0517567	0.193601	0.341	0.215	1
USP10	0.0518298	-0.319241	0.512	0.606	1
HCFC1R1	0.0519482	0.221462	0.878	0.793	1
WIPI2	0.0520622	-0.268296	0.463	0.621	1
FMR1NB	0.0521424	0.242584	0.195	0.095	1
STRBP	0.0525544	0.0905342	0.122	0.049	1
RNF213-AS1	0.0525544	0.0940402	0.122	0.049	1
WDR18	0.052566	0.211266	0.61	0.458	1
REX1BD	0.0525993	-0.273026	0.78	0.9	1
CREB5	0.052635	0.0902424	0.122	0.049	1
TRPT1	0.0526627	-0.189726	0.341	0.552	1
BCL2L13	0.0530303	-0.188195	0.195	0.35	1
PLAU	0.0530443	0.40817	0.537	0.399	1
AC244102.4	0.0530676	0.240649	0.244	0.141	1
SMTN	0.0532238	0.211067	0.659	0.501	1
SLC7A2	0.0532556	-0.336944	0.073	0.189	1
HOXD10	0.0532982	0.174313	0.659	0.488	1
TMEM117	0.0533232	0.749582	0.585	0.43	1
MAGOH	0.0533501	0.195862	0.878	0.79	1
WARS2-AS1	0.0533902	-0.120294	0	0.084	1
GLYCTK	0.0533902	-0.120294	0	0.084	1
EGFLAM	0.0533902	-0.120294	0	0.084	1
FBXL14	0.0533902	-0.120294	0	0.084	1
AC016831.1	0.0534303	-0.127067	0	0.084	1
SLC35F3	0.0534655	-0.147198	0	0.084	1
DGCR2	0.0534693	0.13009	0.341	0.202	1
ZNF724	0.0535864	0.0905342	0.122	0.049	1
A1BG	0.0536147	-0.328001	0.512	0.591	1
CPTP	0.0538308	0.170483	0.317	0.192	1
C15orf40	0.0538416	0.176657	0.659	0.496	1
SSBP1	0.0541477	-0.150072	1	0.995	1
ATP11B	0.0542051	0.135356	0.463	0.302	1
UCHL1	0.0542775	0.0916203	0.976	1	1
CCNJL	0.0544461	0.100703	0.146	0.064	1
TUBD1	0.0544461	0.100703	0.146	0.064	1
ABCC9	0.0544461	0.0972552	0.146	0.064	1
AC008443.5	0.0544704	-0.151871	0.024	0.125	1
AC018978.1	0.0544851	0.140015	0.293	0.166	1
PPHLN1	0.0545691	-0.24268	0.488	0.624	1
ABCC10	0.0545894	-0.148626	0.024	0.125	1
COTL1	0.0546853	0.229826	1	0.982	1
MEF2C	0.0548056	0.259705	0.268	0.156	1
CELF1	0.0548084	-0.270998	0.463	0.575	1
CRIP2	0.0548893	0.282619	0.463	0.325	1
MOAP1	0.0548942	-0.165753	0.049	0.161	1
NOL4L	0.0551102	-0.170553	0.073	0.199	1
TRMT112	0.0553306	-0.179304	1	1	1
DPCD	0.0553877	-0.286917	0.415	0.537	1
ACBD6	0.0555738	0.219141	0.756	0.662	1
HECA	0.0555813	0.0972552	0.146	0.064	1
MYCBP	0.0556201	0.14522	0.659	0.468	1
ARAF	0.0557611	0.153492	0.293	0.171	1
HMGXB4	0.0558024	-0.233107	0.439	0.591	1
PPAT	0.0560599	-0.163265	0.171	0.33	1
PPM1M	0.0562332	0.136864	0.171	0.082	1
AL031058.1	0.0562622	-0.208937	0.073	0.192	1
XRN1	0.0563095	0.324556	0.585	0.483	1
FNTA	0.0565382	0.155171	0.659	0.486	1
CEP85L	0.0565861	0.145291	0.415	0.263	1
C1orf35	0.0565994	0.268169	0.488	0.371	1
SP100	0.0567127	-0.262602	0.561	0.726	1
GRB10	0.0567366	-0.194253	0.098	0.223	1
G2E3	0.0568826	0.244703	0.561	0.417	1
CENPW	0.0569259	0.288087	0.805	0.724	1
DYNC2LI1	0.0570947	-0.21165	0.122	0.251	1
TUBA1C	0.0571172	0.298579	1	0.977	1
ATAD3A	0.057328	0.235551	0.317	0.202	1
TCFL5	0.05738	0.109959	0.195	0.097	1
HHEX	0.0574317	-0.113489	0	0.082	1
ULK4	0.0574321	0.199478	0.341	0.215	1
CDC20	0.057454	0.335405	0.488	0.34	1
CCDC190	0.0574541	-0.116896	0	0.082	1
MIR3142HG	0.0574541	-0.116896	0	0.082	1
U52111.1	0.0574541	-0.116896	0	0.082	1
SLC25A44	0.057475	-0.120294	0	0.082	1
RAD52	0.0574946	-0.127067	0	0.082	1
CDPF1	0.0575298	-0.137168	0	0.082	1
GOLIM4	0.0579451	-0.283418	0.634	0.747	1
C9orf16	0.0580483	-0.283252	0.951	0.962	1
REPS1	0.0581037	0.245044	0.39	0.261	1
KIAA0100	0.0581797	-0.18001	0.195	0.34	1
PMAIP1	0.0583131	0.212076	0.439	0.309	1
COMMD5	0.0584568	0.148308	0.683	0.522	1
TIMM10	0.0586201	0.279236	0.732	0.647	1
VPS26C	0.0588523	-0.173477	0.146	0.294	1
ZNF775	0.0588684	0.146558	0.244	0.136	1
SIRT5	0.0588743	-0.142112	0.024	0.123	1
DGCR8	0.0589864	-0.159466	0.049	0.159	1
ARMCX6	0.059036	-0.170209	0.195	0.348	1
CD276	0.0591403	-0.230857	0.146	0.276	1
ZNF526	0.0592961	0.113921	0.171	0.082	1
HOXD11	0.0594774	0.281218	0.756	0.596	1
METAP2	0.0595237	0.284951	0.829	0.772	1
RAD18	0.0595471	0.224129	0.488	0.35	1
QRICH1	0.0595519	-0.200245	0.098	0.225	1
EEF2KMT	0.0596026	-0.173477	0.146	0.294	1
ZFP36L2	0.0596027	0.338121	0.341	0.248	1
MT-ND1	0.0596817	0.194069	1	1	1
MT1G	0.0598109	0.125983	0.073	0.023	1
CALR	0.0598688	-0.176394	1	1	1
C18orf25	0.059883	-0.200118	0.098	0.22	1
ARHGAP1	0.059889	-0.220458	0.098	0.22	1
SOAT1	0.0599038	0.179472	0.317	0.197	1
S100G	0.0600901	0.0975546	0.098	0.036	1
SLC25A10	0.060169	0.243301	0.171	0.084	1
RHOQ	0.060208	0.211381	0.561	0.422	1
ZNF33B	0.0602574	0.12419	0.268	0.151	1
CCNJ	0.0603087	0.0835478	0.098	0.036	1
EEF1AKMT3	0.0603087	0.0835478	0.098	0.036	1
NAV1	0.0604638	-0.301116	0.659	0.726	1
TMPO-AS1	0.0606942	0.125067	0.122	0.051	1
MAF1	0.0607169	0.264688	0.78	0.655	1
GALNT6	0.0607394	-0.088513	0.098	0.243	1
SDHB	0.0609005	-0.233152	0.61	0.767	1
CSNK1E	0.0609583	0.232874	0.756	0.703	1
IL11	0.0610511	0.0942917	0.976	0.941	1
PRSS23	0.0610647	-0.148626	0.951	0.931	1
PRC1	0.061068	0.250701	0.61	0.425	1
EVA1C	0.0610891	-0.217078	0.122	0.253	1
TOMM40L	0.0613668	0.07999	0.098	0.036	1
AATF	0.0615423	0.235325	0.585	0.478	1
CSTF1	0.0615986	0.170483	0.341	0.212	1
FXR1	0.061686	0.16601	0.951	0.859	1
HIST1H2AE	0.0617077	0.0978675	0.073	0.023	1
NLK	0.0618163	-0.246373	0.171	0.299	1
OSR2	0.0618253	-0.113489	0	0.079	1
ZNF213-AS1	0.0618253	-0.116896	0	0.079	1
COL16A1	0.0618464	-0.116896	0	0.079	1
OARD1	0.0618599	0.25625	0.39	0.274	1
EBF1	0.0619005	-0.127067	0	0.079	1
LINC00944	0.0619005	-0.127067	0	0.079	1
CXCL2	0.0619957	-0.298868	0	0.079	1
ALOX12-AS1	0.0620493	-0.121162	0.024	0.125	1
PUDP	0.0622454	0.170057	0.415	0.276	1
SERPINE2	0.0623008	-0.361899	0.854	0.921	1
ST5	0.0623761	-0.266395	0.195	0.332	1
MISP3	0.0624387	0.0729005	0.098	0.036	1
DNER	0.0626262	0.282232	0.634	0.483	1
KIF15	0.0626399	0.161701	0.317	0.192	1
ETV4	0.062687	-0.189471	0.146	0.284	1
SMURF1	0.0627209	0.170057	0.415	0.274	1
CTIF	0.0630031	-0.22892	0.22	0.358	1
MBNL2	0.0632422	-0.303475	0.415	0.55	1
RPL39L	0.0632425	0.40072	0.683	0.65	1
GOLT1B	0.0632444	-0.236944	0.463	0.581	1
MALAT1	0.0632782	-0.214479	1	1	1
SPIN2B	0.063392	0.106166	0.22	0.115	1
TMEM9	0.0635554	0.196206	0.512	0.376	1
MATN3	0.0636483	0.0690482	0.073	0.023	1
AC091607.2	0.0636483	0.0690482	0.073	0.023	1
MANEA-DT	0.0636483	0.0690482	0.073	0.023	1
VWCE	0.0636483	0.0690482	0.073	0.023	1
AL132780.2	0.0636483	0.0690482	0.073	0.023	1
NT5M	0.0636483	0.0690482	0.073	0.023	1
LINC02595	0.0636483	0.0690482	0.073	0.023	1
AAK1	0.063699	-0.265256	0.561	0.665	1
CCDC28B	0.0637168	-0.229418	0.317	0.491	1
C4orf33	0.063746	0.140262	0.171	0.084	1
HSCB	0.0639199	-0.221307	0.22	0.358	1
ZNF605	0.0639514	0.116639	0.195	0.1	1
TES	0.0640675	-0.241049	0.171	0.299	1
GPCPD1	0.0640759	0.141964	0.317	0.187	1
UCK2	0.0640848	0.220856	0.585	0.483	1
SPAG1	0.0641691	0.172084	0.293	0.176	1
SNAPC3	0.0642249	-0.162431	0.195	0.345	1
GNG10	0.0642266	0.201336	1	0.954	1
SYNRG	0.0642622	-0.252418	0.22	0.348	1
ERCC6	0.0642771	-0.0975482	0.171	0.327	1
RTN4	0.0643485	0.147121	1	1	1
TMEM50A	0.064441	0.222495	1	0.997	1
ZNF717	0.0645815	0.0969683	0.171	0.082	1
NECTIN3-AS1	0.0646247	0.0553279	0.098	0.036	1
SMAP2	0.0651356	-0.219463	0.317	0.453	1
DDX59	0.0651669	0.182481	0.317	0.199	1
SMIM29	0.0652895	0.19614	0.537	0.391	1
C1orf43	0.0653527	-0.199515	0.683	0.79	1
MTG2	0.0653541	0.170332	0.366	0.238	1
SLC39A6	0.0655028	0.193767	0.512	0.394	1
LGALS8	0.0655628	0.13991	0.366	0.23	1
RERGL	0.0656691	0.0475685	0.073	0.023	1
ABHD3	0.0657798	0.200666	0.293	0.179	1
TCP1	0.0659521	-0.286047	0.634	0.734	1
SORT1	0.0659732	-0.205959	0.122	0.246	1
CDK1	0.0663888	0.444416	0.439	0.327	1
CASC15	0.066414	-0.121162	0.024	0.123	1
FNBP1	0.0664179	0.213059	0.415	0.297	1
AC005921.2	0.0664713	0.133473	0.171	0.084	1
TARBP1	0.0664933	0.133734	0.244	0.136	1
AP4B1	0.0664936	0.0870368	0.122	0.051	1
BTBD19	0.0665492	-0.113489	0	0.077	1
ARID3B	0.0665492	-0.113489	0	0.077	1
HIST1H3D	0.0666306	0.189613	0.268	0.156	1
SLC25A4	0.0666562	-0.231185	0.366	0.529	1
MGP	0.0666703	-0.380497	0	0.077	1
LYPD6	0.0667229	0.218477	0.244	0.143	1
PCAT19	0.0667515	-0.209078	0.024	0.118	1
ATP6V1F	0.0670533	-0.183601	1	0.982	1
PPP4C	0.067055	0.148356	0.951	0.931	1
PLA2G4A	0.0671324	-0.231954	0.098	0.215	1
PPIE	0.0671627	0.293404	0.634	0.506	1
CLTC	0.0672575	0.165408	0.902	0.816	1
CUL1	0.0674493	0.163836	0.634	0.483	1
TTBK2	0.0676482	-0.155541	0.073	0.192	1
C1orf109	0.067741	0.115969	0.22	0.118	1
DDR1	0.0678666	0.13009	0.171	0.084	1
SERPIND1	0.0679792	-0.172078	0.098	0.228	1
SUPV3L1	0.0680473	-0.153152	0.049	0.153	1
TFDP1	0.0680803	0.206291	0.683	0.573	1
PVT1	0.0681621	-0.214676	0.415	0.598	1
EIF2AK3	0.0683291	-0.156313	0.049	0.153	1
CDKN3	0.0684235	0.279299	0.683	0.519	1
PSMB4	0.0686012	-0.235463	0.659	0.747	1
SACS	0.0686371	0.219752	0.512	0.384	1
ANKRD27	0.0686914	0.142189	0.244	0.138	1
MRM3	0.0688436	0.183083	0.268	0.159	1
WAC-AS1	0.0688439	-0.190446	0.195	0.34	1
DECR2	0.068961	-0.199985	0.073	0.184	1
PDIA4	0.0690252	-0.228269	0.854	0.905	1
TSHZ3	0.069198	0.133301	0.366	0.235	1
WASL	0.0692449	0.202192	0.585	0.427	1
RPP40	0.0693205	-0.15983	0.195	0.343	1
ATP1B3	0.0693729	-0.243434	0.854	0.841	1
PRR11	0.0693895	0.35054	0.366	0.269	1
ZBTB8OS	0.069426	-0.224575	0.537	0.678	1
TRMT2A	0.0696349	0.16601	0.22	0.123	1
ABL1	0.0696943	0.193061	0.561	0.409	1
RAB2B	0.0697914	-0.199985	0.073	0.184	1
PILRB	0.06989	0.0999983	0.195	0.1	1
TMEM134	0.0699454	-0.157113	0.415	0.586	1
TRMT61A	0.0700777	0.17547	0.268	0.159	1
ANKIB1	0.0701098	-0.253205	0.488	0.601	1
ZNF668	0.0701479	0.110515	0.171	0.084	1
C11orf91	0.0702056	-0.184941	0.073	0.184	1
PNMA2	0.0702404	-0.176515	0.073	0.189	1
TNPO1	0.0703167	0.279221	0.732	0.629	1
PLK1	0.0706701	0.168508	0.341	0.207	1
DDX1	0.0707939	0.16255	0.854	0.655	1
DLGAP5	0.0709962	0.377183	0.488	0.361	1
MYOSLID	0.0712585	-0.117924	0.024	0.12	1
RBFOX2	0.0713986	-0.286129	0.756	0.849	1
RELCH	0.0714352	-0.228112	0.146	0.269	1
USP33	0.0714976	0.167113	0.585	0.435	1
SNX18	0.0715485	-0.111425	0.024	0.12	1
CNNM2	0.0715888	-0.106652	0	0.074	1
MLYCD	0.0715888	-0.106652	0	0.074	1
CPEB2	0.07161	-0.110074	0	0.074	1
DDX28	0.07161	-0.110074	0	0.074	1
LBX2	0.0716297	-0.116896	0	0.074	1
TESPA1	0.0716474	-0.116896	0	0.074	1
RTRAF	0.0716552	0.193475	0.976	0.957	1
MORF4L1	0.0716831	-0.174734	1	1	1
PRKDC	0.0718133	0.285013	0.976	0.923	1
KLF9	0.0718387	-0.178243	0.049	0.151	1
ALCAM	0.0718461	0.289416	0.976	0.951	1
C5orf34	0.0719108	0.201942	0.244	0.146	1
LMBRD1	0.0720029	-0.216626	0.171	0.302	1
NAP1L5	0.0720626	0.178638	0.244	0.143	1
GIN1	0.0720637	0.127629	0.146	0.069	1
SERPINH1	0.0720721	-0.220314	0.634	0.754	1
SNHG5	0.0720796	0.1382	1	0.987	1
TMEM30A	0.0720904	-0.251	0.634	0.744	1
YKT6	0.0721589	-0.235565	0.317	0.455	1
USF3	0.0724474	-0.159466	0.049	0.151	1
SGCB	0.0724619	0.132046	0.902	0.777	1
ABCB10	0.0726412	-0.145373	0.024	0.115	1
SKA3	0.0727286	0.239002	0.317	0.202	1
KRI1	0.0727515	-0.159466	0.049	0.151	1
CALM2	0.0727699	0.122576	1	1	1
ZBTB44	0.072795	-0.143417	0.073	0.189	1
CCDC57	0.0729006	-0.146458	0.073	0.189	1
MCCC2	0.07292	0.12584	0.195	0.102	1
NRIP3	0.0729269	-0.263674	0.195	0.317	1
LDHA	0.0729762	-0.160407	1	1	1
PRXL2A	0.0730167	0.363656	0.415	0.304	1
TTC23	0.0730545	-0.156313	0.049	0.151	1
RAB40C	0.0733041	-0.132287	0.024	0.115	1
AF117829.1	0.0734055	-0.217319	0.122	0.24	1
ZNF740	0.0736273	-0.125699	0.024	0.115	1
MT-ND6	0.0737399	0.577362	0.805	0.657	1
CAPN2	0.0740398	-0.184385	0.561	0.754	1
MAPK12	0.0740407	-0.156656	0.098	0.22	1
GNPDA2	0.0740885	-0.200596	0.171	0.302	1
ZNF684	0.0741011	0.113295	0.195	0.102	1
COL1A2	0.0741027	-0.305565	0.951	0.967	1
RNMT	0.0741152	0.185728	0.634	0.483	1
SDC1	0.0742654	0.152189	0.293	0.179	1
MAFF	0.0742784	0.144636	0.439	0.304	1
UBE2T	0.0743676	0.21066	0.756	0.575	1
SNHG1	0.0744701	-0.173537	0.073	0.187	1
SEC24D	0.0744767	-0.253318	0.561	0.67	1
CREBBP	0.0744919	-0.23838	0.244	0.373	1
HAUS5	0.0746072	0.100343	0.171	0.084	1
PCDHGC3	0.0746802	0.111699	0.098	0.038	1
WDR45B	0.0747114	-0.121852	0.268	0.435	1
DHFR	0.0747548	0.209079	0.634	0.453	1
LIG3	0.0747778	-0.178879	0.073	0.182	1
SRPRB	0.0748149	-0.220458	0.268	0.404	1
DENR	0.0748327	0.241298	0.805	0.706	1
PROCR	0.0748471	-0.233642	0.341	0.488	1
THRA	0.0749144	-0.180067	0.098	0.217	1
CMTM7	0.0749383	0.180716	0.317	0.205	1
GPATCH2	0.0749738	-0.223507	0.244	0.373	1
THY1	0.0752772	-0.282733	0.902	0.926	1
CDC37L1	0.075344	-0.190134	0.171	0.302	1
BUB1	0.0753802	0.199606	0.366	0.24	1
ACAD9	0.0753919	-0.191632	0.122	0.24	1
MAK16	0.0754195	0.221314	0.341	0.23	1
SNX15	0.0756682	-0.172792	0.073	0.182	1
STAC	0.0756701	-0.181913	0.073	0.182	1
TMEM154	0.0759195	0.122542	0.195	0.102	1
TMEM237	0.0761373	0.353687	0.61	0.527	1
CARNMT1	0.0762578	-0.173537	0.098	0.212	1
IQSEC2	0.0762601	-0.182452	0.098	0.212	1
CPSF1	0.0765868	0.177262	0.22	0.125	1
ZNF852	0.0768886	0.100703	0.146	0.069	1
MAU2	0.077007	-0.166679	0.073	0.182	1
ZNF568	0.0770363	-0.103221	0	0.072	1
THAP7-AS1	0.0770363	-0.103221	0	0.072	1
URB2	0.0770769	-0.110074	0	0.072	1
LINC02860	0.0770771	-0.113489	0	0.072	1
ANK3	0.0771505	-0.130442	0	0.072	1
APP	0.0771644	-0.254645	0.683	0.772	1
ICK	0.0771649	-0.135719	0.049	0.153	1
SF3B5	0.0773136	-0.180574	1	0.982	1
DUSP7	0.0773624	0.106631	0.195	0.102	1
VPS36	0.0773732	-0.241938	0.268	0.402	1
TMCC1	0.0773778	0.233295	0.463	0.348	1
COA1	0.0773872	0.166612	0.902	0.818	1
UROD	0.0773974	-0.250239	0.512	0.611	1
HEATR5B	0.0775559	-0.194753	0.122	0.246	1
NOL9	0.0777094	-0.192513	0.171	0.302	1
RAVER1	0.0777768	0.178638	0.244	0.143	1
TFAM	0.0779042	0.175242	0.61	0.481	1
IPP	0.0779102	-0.143417	0.073	0.187	1
ZBTB38	0.0779208	0.11841	0.927	0.726	1
SRXN1	0.0780198	0.111029	0.293	0.174	1
USP12	0.0781332	0.189342	0.439	0.317	1
WBP2	0.0781439	-0.268948	0.293	0.417	1
CNRIP1	0.0781722	0.243349	0.439	0.327	1
C11orf24	0.0782506	0.167358	0.39	0.266	1
AC244131.2	0.078301	-0.142112	0.024	0.113	1
PBX1	0.0785123	-0.290848	0.22	0.355	1
PUM3	0.0786133	-0.243203	0.512	0.614	1
GNPNAT1	0.07862	0.208552	0.61	0.478	1
RPL37	0.07863	-0.101738	1	1	1
WDR44	0.0787941	0.151935	0.39	0.261	1
CNOT3	0.0787963	-0.216847	0.171	0.292	1
RNF215	0.0787976	-0.154374	0.073	0.182	1
PPP2R5D	0.0788086	0.231494	0.268	0.166	1
AFG3L2	0.0788126	0.16601	0.512	0.368	1
PRPF38B	0.0788214	0.235551	0.61	0.488	1
NCKAP1	0.0788564	-0.240636	0.488	0.586	1
FBXO28	0.078996	0.147431	0.366	0.238	1
ATXN2	0.0790471	0.179472	0.829	0.701	1
AASDHPPT	0.0791648	-0.28258	0.463	0.563	1
KIF11	0.0792297	0.203945	0.341	0.223	1
FOXO3	0.0792715	0.149136	0.439	0.307	1
IDUA	0.0793024	0.07999	0.098	0.038	1
HOXA5	0.0793024	0.07999	0.098	0.038	1
AP000662.1	0.0793024	0.07999	0.098	0.038	1
TMEM267	0.0794083	0.18621	0.244	0.146	1
RPS6KB1	0.079464	-0.200367	0.146	0.266	1
SSRP1	0.0794968	0.217131	0.707	0.593	1
IMPA1	0.0797276	0.172173	0.512	0.361	1
CENPC	0.0797664	0.179763	0.366	0.248	1
CERK	0.0798511	0.172084	0.293	0.184	1
NABP2	0.0798522	0.185539	0.488	0.368	1
CD3EAP	0.0798885	-0.167189	0.122	0.251	1
CABIN1	0.0800103	-0.200806	0.195	0.322	1
SERTAD2	0.0800711	0.171495	0.415	0.294	1
PAPOLG	0.0800967	0.132457	0.195	0.105	1
RUVBL1	0.0804215	-0.249028	0.61	0.688	1
CCDC144NL-AS1	0.0805926	0.113543	0.22	0.12	1
GXYLT2	0.0805929	0.0764409	0.098	0.038	1
LIPT2	0.0805929	0.0764409	0.098	0.038	1
AL121821.2	0.0805929	0.0764409	0.098	0.038	1
PAPSS1	0.0807741	-0.232772	0.415	0.542	1
PSG4	0.0808582	0.266412	0.537	0.448	1
AC100810.1	0.0808939	0.242778	0.585	0.488	1
RSU1	0.0809339	-0.287335	0.683	0.762	1
BTBD3	0.0810269	-0.15252	0.073	0.184	1
CMTM4	0.0810726	0.108422	0.244	0.138	1
P4HA2	0.0811123	-0.269429	0.707	0.757	1
LGALS1	0.0811247	0.120799	1	1	1
ACAA1	0.0811298	-0.208341	0.293	0.427	1
EPS8L1	0.0812402	0.14404	0.049	0.013	1
SNHG31	0.081359	0.0801412	0.146	0.069	1
PACC1	0.0814054	0.182481	0.293	0.184	1
NR1H2	0.0814168	0.27247	0.561	0.468	1
P4HTM	0.0814765	0.14041	0.512	0.363	1
CAMLG	0.0815473	-0.199916	0.659	0.749	1
UGGT2	0.0816346	0.131843	0.683	0.527	1
USPL1	0.0816433	-0.135855	0.098	0.217	1
RPS2	0.0819724	0.124915	1	1	1
HMGN4	0.082019	-0.166066	0.317	0.473	1
SGTA	0.0820678	0.203218	0.463	0.345	1
SF3B4	0.082108	-0.191105	0.463	0.611	1
MFAP5	0.0821451	-0.10137	0.098	0.217	1
INSYN2B	0.0821706	0.182088	0.439	0.322	1
CMBL	0.0822269	-0.217078	0.146	0.263	1
SORBS3	0.0824014	0.191189	0.707	0.535	1
ASTE1	0.0825237	0.0870368	0.122	0.054	1
MGARP	0.0826094	-0.134099	0.22	0.368	1
TMEM14B	0.0826347	0.21632	1	0.974	1
AC108134.2	0.0826777	0.151111	0.195	0.105	1
PPP1R2	0.0828169	0.229089	0.634	0.532	1
ZNF736	0.0828791	-0.0963343	0	0.069	1
TTN-AS1	0.082902	-0.0997816	0	0.069	1
TIMM23B	0.082902	-0.103221	0	0.069	1
ZNF551	0.082902	-0.0997816	0	0.069	1
FBXO48	0.0829156	0.102531	0.244	0.138	1
ROBO3	0.0829187	0.118543	0.244	0.141	1
ZNF682	0.0829231	-0.103221	0	0.069	1
AL365295.1	0.0829424	-0.106652	0	0.069	1
RUNX1T1	0.0829426	-0.113489	0	0.069	1
ZNF69	0.0829604	-0.113489	0	0.069	1
SKA1	0.0829717	0.107949	0.244	0.138	1
TMEM59	0.082985	-0.230102	0.976	0.957	1
MRPL51	0.0831411	0.169588	1	0.995	1
ERG28	0.0832147	-0.166996	0.293	0.44	1
SENP6	0.0833283	0.193425	0.732	0.616	1
AL513327.2	0.0833521	0.0503809	0.049	0.013	1
KIF21B	0.0833521	0.0503809	0.049	0.013	1
AC092164.1	0.0833521	0.0503809	0.049	0.013	1
PARTICL	0.0833521	0.0503809	0.049	0.013	1
AC092683.1	0.0833521	0.0503809	0.049	0.013	1
AC097662.1	0.0833521	0.0503809	0.049	0.013	1
OPA1-AS1	0.0833521	0.0503809	0.049	0.013	1
LINC01099	0.0833521	0.0503809	0.049	0.013	1
AC114930.1	0.0833521	0.0503809	0.049	0.013	1
SERF1A	0.0833521	0.0503809	0.049	0.013	1
AL606923.2	0.0833521	0.0503809	0.049	0.013	1
GPR63	0.0833521	0.0503809	0.049	0.013	1
AL035446.1	0.0833521	0.0503809	0.049	0.013	1
TRG-AS1	0.0833521	0.0503809	0.049	0.013	1
AC083862.3	0.0833521	0.0503809	0.049	0.013	1
PITRM1-AS1	0.0833521	0.0503809	0.049	0.013	1
C10orf25	0.0833521	0.0503809	0.049	0.013	1
LINC01537	0.0833521	0.0503809	0.049	0.013	1
ADPRHL1	0.0833521	0.0503809	0.049	0.013	1
AC005520.2	0.0833521	0.0503809	0.049	0.013	1
INO80-AS1	0.0833521	0.0503809	0.049	0.013	1
MSLN	0.0833521	0.0503809	0.049	0.013	1
AC012184.4	0.0833521	0.0503809	0.049	0.013	1
MC1R	0.0833521	0.0503809	0.049	0.013	1
ABHD15-AS1	0.0833521	0.0503809	0.049	0.013	1
TMPRSS9	0.0833521	0.0503809	0.049	0.013	1
PSPN	0.0833521	0.0503809	0.049	0.013	1
AC006213.2	0.0833521	0.0503809	0.049	0.013	1
TPTE	0.0833521	0.0503809	0.049	0.013	1
MTCP1	0.0833521	0.0503809	0.049	0.013	1
KIFAP3	0.0834482	-0.244027	0.244	0.363	1
ARID3A	0.0836069	0.174038	0.22	0.125	1
RRAS	0.083699	-0.189792	0.976	0.995	1
DUS4L	0.0837767	-0.153152	0.049	0.146	1
ZNF766	0.0838804	0.193549	0.268	0.169	1
PPP6R3	0.0839641	0.244371	0.512	0.417	1
ZNF3	0.0839641	0.0800672	0.122	0.054	1
TTLL12	0.0839641	0.0800672	0.122	0.054	1
TST	0.0839676	0.162946	0.659	0.509	1
CHPF	0.0840744	-0.146004	0.366	0.522	1
MTCH1	0.0840962	0.144496	1	0.972	1
SLFN5	0.0841947	-0.281	0.341	0.491	1
OXNAD1	0.08422	0.136929	0.244	0.143	1
ZNF112	0.0842538	0.127629	0.146	0.072	1
RPL34	0.0843715	-0.120224	1	1	1
ZFHX4-AS1	0.0843894	-0.132287	0.024	0.11	1
ST6GAL2	0.0844341	0.0467424	0.049	0.013	1
C3orf67-AS1	0.0844341	0.0467424	0.049	0.013	1
CNIH2	0.0844341	0.0467424	0.049	0.013	1
AC011313.1	0.0844341	0.0467424	0.049	0.013	1
TSC1	0.0844748	-0.140441	0.049	0.146	1
KCTD20	0.0845	-0.288973	0.415	0.537	1
CCNY	0.0846206	-0.231591	0.512	0.619	1
AHNAK	0.084683	0.240094	0.902	0.818	1
ACOT7	0.0846929	0.2255	0.634	0.501	1
AC008825.1	0.0847183	0.170057	0.366	0.24	1
CPSF2	0.0847286	-0.223178	0.244	0.376	1
MAP2K3	0.0848261	0.187104	0.61	0.46	1
NUP37	0.0849519	0.238924	0.512	0.394	1
NEDD4L	0.08509	0.170732	0.488	0.358	1
H2AFX	0.0851334	0.396335	0.585	0.522	1
COMMD6	0.0851586	-0.130177	1	1	1
MEAF6	0.085283	-0.239629	0.585	0.691	1
PSMD4	0.0853257	0.167021	0.951	0.923	1
PTGER3	0.0855259	0.0358814	0.049	0.013	1
OSTF1	0.0856407	-0.256463	0.561	0.637	1
UFSP2	0.085996	-0.230963	0.22	0.348	1
SDAD1	0.0860291	-0.223178	0.244	0.379	1
CRTAP	0.0861247	-0.150641	0.488	0.683	1
GPX4	0.0861306	-0.171683	1	0.995	1
PHF19	0.086175	0.127068	0.61	0.442	1
SIPA1	0.0862384	-0.090244	0.073	0.184	1
PTPN9	0.0862394	0.187749	0.341	0.233	1
YARS2	0.0864971	0.248255	0.463	0.338	1
TMEM120B	0.0865538	-0.134632	0.146	0.281	1
STAT6	0.0867514	-0.182967	0.122	0.235	1
RPA3	0.086901	0.238697	0.878	0.857	1
MRPL3	0.0872132	0.185728	0.902	0.806	1
TCHP	0.087418	-0.190134	0.195	0.322	1
UBTD2	0.0874333	0.153937	0.317	0.205	1
AIG1	0.0874404	0.207225	0.878	0.829	1
FBXL20	0.0874441	-0.138845	0.098	0.212	1
IGFBP6	0.0874517	0.298468	0.976	0.98	1
TIMM29	0.087469	0.131642	0.415	0.274	1
RNH1	0.0876044	-0.109796	0.976	0.995	1
LINC00517	0.087671	0.142441	0.171	0.09	1
RPL24	0.0877338	0.0928752	1	1	1
CDK5RAP2	0.0877583	0.187104	0.561	0.414	1
DAP3	0.0877826	-0.234041	0.561	0.645	1
METTL8	0.0877914	-0.166679	0.073	0.176	1
ESCO1	0.0878079	0.217849	0.317	0.215	1
WDR36	0.0879574	-0.181666	0.171	0.297	1
ZPR1	0.0882188	-0.257933	0.317	0.44	1
ZFPM2	0.0883158	-0.35421	0.415	0.499	1
MYEOV	0.0883194	-0.285553	0.78	0.852	1
EIF3J-DT	0.088354	-0.156313	0.049	0.143	1
AL138828.1	0.0883968	0.0559356	0.122	0.054	1
INTS12	0.088421	0.140919	0.341	0.223	1
TTC21B	0.0885312	-0.172078	0.122	0.24	1
SCUBE3	0.0885562	-0.452505	0.488	0.575	1
TIMM10B	0.0885614	0.205613	0.39	0.286	1
SNRPB	0.0888627	0.188032	1	0.982	1
PTPRB	0.0889589	0.0868912	0.171	0.087	1
DYNLRB1	0.0889701	-0.201918	0.951	0.985	1
SLC35F5	0.089106	-0.176211	0.171	0.297	1
BTN3A3	0.0891977	-0.0928788	0	0.066	1
KLHL17	0.0892205	-0.0963343	0	0.066	1
AC098588.3	0.0892205	-0.0963343	0	0.066	1
TCF21	0.0892205	-0.0963343	0	0.066	1
NINL	0.0892205	-0.0963343	0	0.066	1
APOL6	0.0892205	-0.0997816	0	0.066	1
ARSE	0.0892205	-0.0963343	0	0.066	1
STX7	0.0892366	-0.231954	0.366	0.481	1
CCDC157	0.0892415	-0.0997816	0	0.066	1
AP000697.1	0.0892415	-0.103221	0	0.066	1
IQCH	0.0892606	-0.103221	0	0.066	1
TNNI3	0.0892784	-0.110074	0	0.066	1
ATP6AP1L	0.0892942	-0.113489	0	0.066	1
CERS5	0.0894147	-0.211302	0.171	0.292	1
CLOCK	0.0894299	0.145832	0.537	0.384	1
SLC5A3	0.0894318	0.285309	0.317	0.217	1
AP005230.1	0.0896563	0.0764409	0.073	0.026	1
OXSM	0.0897223	0.106166	0.22	0.123	1
LRP5	0.0898059	-0.182452	0.098	0.205	1
LRMDA	0.0898843	-0.1997	0.024	0.107	1
TIMP2	0.089997	0.217634	0.951	0.898	1
RFC5	0.090235	0.173746	0.268	0.169	1
TFAP2A	0.090242	-0.203696	0.293	0.44	1
RABL3	0.0903964	-0.189809	0.171	0.294	1
TPD52L2	0.0904008	0.247047	0.634	0.496	1
DIAPH1	0.0904189	0.310698	0.634	0.478	1
KCTD2	0.0904368	0.126716	0.171	0.09	1
AC012360.3	0.090472	0.065446	0.073	0.026	1
HPSE	0.090472	0.065446	0.073	0.026	1
TMCO6	0.090472	0.065446	0.073	0.026	1
AL356599.1	0.090472	0.065446	0.073	0.026	1
JAZF1-AS1	0.090472	0.065446	0.073	0.026	1
ZNF891	0.090472	0.065446	0.073	0.026	1
AC026401.3	0.090472	0.065446	0.073	0.026	1
ZNF230	0.090472	0.065446	0.073	0.026	1
ZC3H8	0.0904748	-0.185411	0.098	0.205	1
DUSP12	0.0904933	0.149637	0.512	0.355	1
AC097528.1	0.0905049	0.07999	0.073	0.026	1
UBE2E1	0.0905341	0.146179	0.488	0.358	1
MAP1LC3A	0.0908907	0.248178	0.683	0.601	1
ETFA	0.0909242	0.253473	0.829	0.813	1
FAAP100	0.0909409	-0.125699	0.024	0.107	1
PPP1R12B	0.0910396	-0.122676	0.098	0.212	1
SMC4	0.0910915	0.289512	0.659	0.575	1
ALKBH8	0.0913582	-0.134044	0.049	0.143	1
NQO1	0.0914677	0.212446	0.854	0.77	1
KITLG	0.0914775	-0.194753	0.122	0.238	1
BTBD10	0.0914805	0.157426	0.537	0.386	1
ATG4D	0.0915408	-0.0958202	0.073	0.192	1
CPS1	0.09156	-0.115761	0.024	0.107	1
ERP29	0.0915674	-0.165881	0.927	0.939	1
NEURL1B	0.0917588	0.0618527	0.073	0.026	1
ZNF182	0.0917588	0.0618527	0.073	0.026	1
MIA3	0.0918107	-0.203734	0.317	0.455	1
PARP4	0.0920146	0.206167	0.488	0.391	1
MEG8	0.0920564	-0.299309	0.39	0.529	1
RNPS1	0.0920687	0.24604	0.805	0.706	1
SLC35E1	0.0920948	-0.222261	0.171	0.284	1
IQGAP3	0.0921574	0.115969	0.293	0.179	1
ZNF41	0.0921975	0.118064	0.122	0.056	1
ATF2	0.0922255	-0.205959	0.171	0.292	1
CASK	0.0922424	0.265878	0.463	0.355	1
C9orf40	0.0922541	0.230536	0.512	0.402	1
PAICS	0.0922659	0.264492	0.756	0.678	1
METTL4	0.0922667	-0.160605	0.122	0.24	1
STT3B	0.0923599	-0.201267	0.293	0.43	1
TAF12	0.0923746	-0.128237	0.463	0.652	1
CASP8AP2	0.0924341	-0.15891	0.146	0.263	1
DPH5	0.0925011	0.188517	0.293	0.192	1
[truncated: 23,283 more rows]

## Sheet: gRNA-4vsgRNA1-DEG
Gene	p_val	avg_log2FC	pct.1	pct.2	p_val_adj
LINC01756	7.81e-14	0.192645	0.143	0	1.97e-09
ZBED6	1.97e-09	0.18896	0.143	0.003	4.98e-05
SLC22A14	1.97e-09	0.18896	0.143	0.003	4.98e-05
NR1I2	1.97e-09	0.18896	0.143	0.003	4.98e-05
AC027682.1	1.97e-09	0.18896	0.143	0.003	4.98e-05
AC125793.1	1.97e-09	0.18896	0.143	0.003	4.98e-05
AC080038.2	1.97e-09	0.18896	0.143	0.003	4.98e-05
HCP5	2.49e-09	0.512993	0.429	0.046	6.3e-05
AL163051.1	9.25e-09	0.265424	0.214	0.01	0.000233818
SLC1A4	1.08e-07	0.261776	0.214	0.013	0.00273733
TMEM67	1.28e-07	0.456713	0.357	0.041	0.00323465
CLCA4-AS1	1.36e-07	0.0995357	0.071	0	0.00342597
AL445438.1	1.36e-07	0.0995357	0.071	0	0.00342597
AL137856.1	1.36e-07	0.0995357	0.071	0	0.00342597
CD101	1.36e-07	0.0995357	0.071	0	0.00342597
CTXND2	1.36e-07	0.0995357	0.071	0	0.00342597
AC073091.4	1.36e-07	0.0995357	0.071	0	0.00342597
TEKT4	1.36e-07	0.0995357	0.071	0	0.00342597
LCT	1.36e-07	0.0995357	0.071	0	0.00342597
SLC38A11	1.36e-07	0.0995357	0.071	0	0.00342597
AC010894.4	1.36e-07	0.0995357	0.071	0	0.00342597
AC097500.1	1.36e-07	0.0995357	0.071	0	0.00342597
AC104667.2	1.36e-07	0.0995357	0.071	0	0.00342597
GRM7-AS3	1.36e-07	0.0995357	0.071	0	0.00342597
HDAC11-AS1	1.36e-07	0.0995357	0.071	0	0.00342597
SEMA3B-AS1	1.36e-07	0.0995357	0.071	0	0.00342597
AC012557.2	1.36e-07	0.0995357	0.071	0	0.00342597
TM4SF4	1.36e-07	0.0995357	0.071	0	0.00342597
BANK1	1.36e-07	0.0995357	0.071	0	0.00342597
AC093599.2	1.36e-07	0.0995357	0.071	0	0.00342597
LINC02233	1.36e-07	0.0995357	0.071	0	0.00342597
AC096747.1	1.36e-07	0.0995357	0.071	0	0.00342597
SPINK5	1.36e-07	0.192645	0.071	0	0.00342597
AL031963.1	1.36e-07	0.0995357	0.071	0	0.00342597
ZBED9	1.36e-07	0.0995357	0.071	0	0.00342597
FGD2	1.36e-07	0.0995357	0.071	0	0.00342597
POLH-AS1	1.36e-07	0.0995357	0.071	0	0.00342597
AL356776.2	1.36e-07	0.0995357	0.071	0	0.00342597
C6orf163	1.36e-07	0.0995357	0.071	0	0.00342597
RSPH10B	1.36e-07	0.0995357	0.071	0	0.00342597
ACHE	1.36e-07	0.0995357	0.071	0	0.00342597
AC006372.1	1.36e-07	0.0995357	0.071	0	0.00342597
LPL	1.36e-07	0.36257	0.071	0	0.00342597
AC100861.1	1.36e-07	0.0995357	0.071	0	0.00342597
AC034114.2	1.36e-07	0.0995357	0.071	0	0.00342597
WASHC5-AS1	1.36e-07	0.0995357	0.071	0	0.00342597
AC024382.1	1.36e-07	0.0995357	0.071	0	0.00342597
TMEM249	1.36e-07	0.0995357	0.071	0	0.00342597
NUTM2G	1.36e-07	0.0995357	0.071	0	0.00342597
CT70	1.36e-07	0.0995357	0.071	0	0.00342597
AL138895.1	1.36e-07	0.0995357	0.071	0	0.00342597
AL157395.1	1.36e-07	0.0995357	0.071	0	0.00342597
PROSER2-AS1	1.36e-07	0.0995357	0.071	0	0.00342597
C1QL3	1.36e-07	0.0995357	0.071	0	0.00342597
TMEM26-AS1	1.36e-07	0.0995357	0.071	0	0.00342597
SLIT1	1.36e-07	0.0995357	0.071	0	0.00342597
AC080023.1	1.36e-07	0.0995357	0.071	0	0.00342597
LINC02726	1.36e-07	0.0995357	0.071	0	0.00342597
KCNK7	1.36e-07	0.0995357	0.071	0	0.00342597
TREH	1.36e-07	0.0995357	0.071	0	0.00342597
AP003392.1	1.36e-07	0.0995357	0.071	0	0.00342597
AP000842.2	1.36e-07	0.0995357	0.071	0	0.00342597
OVCH1-AS1	1.36e-07	0.0995357	0.071	0	0.00342597
AC079601.1	1.36e-07	0.0995357	0.071	0	0.00342597
FAM186A	1.36e-07	0.0995357	0.071	0	0.00342597
LINC00566	1.36e-07	0.0995357	0.071	0	0.00342597
LINC01068	1.36e-07	0.0995357	0.071	0	0.00342597
CLDN10	1.36e-07	0.0995357	0.071	0	0.00342597
AL160191.1	1.36e-07	0.0995357	0.071	0	0.00342597
AC009268.2	1.36e-07	0.0995357	0.071	0	0.00342597
AC022306.2	1.36e-07	0.0995357	0.071	0	0.00342597
AC105339.3	1.36e-07	0.0995357	0.071	0	0.00342597
AC090907.1	1.36e-07	0.0995357	0.071	0	0.00342597
AC022167.3	1.36e-07	0.0995357	0.071	0	0.00342597
AC009093.1	1.36e-07	0.0995357	0.071	0	0.00342597
AC120114.1	1.36e-07	0.0995357	0.071	0	0.00342597
AC106886.3	1.36e-07	0.0995357	0.071	0	0.00342597
AC007347.1	1.36e-07	0.0995357	0.071	0	0.00342597
AC040168.1	1.36e-07	0.0995357	0.071	0	0.00342597
AC044802.1	1.36e-07	0.0995357	0.071	0	0.00342597
HSD11B2	1.36e-07	0.0995357	0.071	0	0.00342597
EVI2B	1.36e-07	0.0995357	0.071	0	0.00342597
GFAP	1.36e-07	0.0995357	0.071	0	0.00342597
MAP3K14-AS1	1.36e-07	0.0995357	0.071	0	0.00342597
AC003070.2	1.36e-07	0.0995357	0.071	0	0.00342597
NPB	1.36e-07	0.0995357	0.071	0	0.00342597
CELF4	1.36e-07	0.0995357	0.071	0	0.00342597
SLC14A2	1.36e-07	0.0995357	0.071	0	0.00342597
ONECUT2	1.36e-07	0.0995357	0.071	0	0.00342597
AC010336.1	1.36e-07	0.0995357	0.071	0	0.00342597
AC020917.3	1.36e-07	0.0995357	0.071	0	0.00342597
AC008764.2	1.36e-07	0.0995357	0.071	0	0.00342597
ADM5	1.36e-07	0.0995357	0.071	0	0.00342597
AC011468.1	1.36e-07	0.0995357	0.071	0	0.00342597
ZSCAN1	1.36e-07	0.0995357	0.071	0	0.00342597
HDHD5-AS1	1.36e-07	0.0995357	0.071	0	0.00342597
AL023553.1	1.36e-07	0.0995357	0.071	0	0.00342597
PRR34	1.36e-07	0.0995357	0.071	0	0.00342597
DIO1	3.03e-07	0.577602	0.143	0.005	0.00767204
PURG	3.03e-07	0.272747	0.143	0.005	0.00767204
BX284668.2	3.26e-07	0.185284	0.143	0.005	0.00824163
COLQ	3.26e-07	0.185284	0.143	0.005	0.00824163
AC093627.6	3.26e-07	0.185284	0.143	0.005	0.00824163
AC004988.1	3.26e-07	0.185284	0.143	0.005	0.00824163
ARNTL2-AS1	3.26e-07	0.185284	0.143	0.005	0.00824163
AC003005.2	3.26e-07	0.185284	0.143	0.005	0.00824163
DENND3	4.82e-07	0.365097	0.357	0.043	0.0121895
SFXN4	2.5e-06	0.633745	0.857	0.284	0.0630933
DCLRE1B	3.44e-06	0.254508	0.214	0.018	0.0870609
EBLN2	3.44e-06	0.254508	0.214	0.018	0.0870609
AC079447.1	3.67e-06	0.250888	0.214	0.018	0.0927527
AC092142.1	6.56e-06	0.269081	0.143	0.008	0.165952
AC130324.2	6.56e-06	0.269081	0.143	0.008	0.165952
CPLX2	6.95e-06	0.265424	0.143	0.008	0.175739
IGFN1	7.15e-06	0.181618	0.143	0.008	0.180755
AP003396.5	7.15e-06	0.181618	0.143	0.008	0.180755
AL133166.1	7.15e-06	0.181618	0.143	0.008	0.180755
TRPV1	7.15e-06	0.181618	0.143	0.008	0.180755
CCNJ	8.61e-06	0.311817	0.286	0.036	0.217563
AL035587.1	1.22e-05	0.250888	0.214	0.02	0.308118
C12orf66	1.22e-05	0.250888	0.214	0.02	0.308118
AC025614.2	5.17e-05	0.265424	0.143	0.01	1
ADRA1B	5.69e-05	0.177961	0.143	0.01	1
LHFPL3	5.69e-05	0.177961	0.143	0.01	1
TMEM169	5.96e-05	0.170675	0.143	0.01	1
ANKS3	6.39e-05	0.408085	0.5	0.123	1
POMT1	6.73e-05	0.418239	0.357	0.069	1
AC109587.1	9.01e-05	0.240081	0.214	0.026	1
ETS2	0.000102995	0.360726	0.429	0.095	1
POLD3	0.000169024	0.582166	0.714	0.258	1
SAXO1	0.000185526	0.240081	0.214	0.028	1
ATP13A1	0.00018858	0.364047	0.429	0.102	1
SLC25A17	0.000207906	0.53753	0.786	0.325	1
AC097662.1	0.000228587	0.261776	0.143	0.013	1
VAMP8	0.0002364	0.252496	0.286	0.049	1
GNA11	0.000250634	0.611802	0.714	0.304	1
AC110769.2	0.000252745	0.174313	0.143	0.013	1
AC009951.6	0.000252745	0.174313	0.143	0.013	1
TIMP4	0.000252745	0.174313	0.143	0.013	1
APBB3	0.000252745	0.174313	0.143	0.013	1
AL589740.1	0.000252745	0.174313	0.143	0.013	1
AL035446.1	0.000252745	0.174313	0.143	0.013	1
NOMO3	0.000252745	0.174313	0.143	0.013	1
AP000240.1	0.000252745	0.174313	0.143	0.013	1
STAC3	0.00026316	0.170675	0.143	0.013	1
GRAP2	0.00026316	0.170675	0.143	0.013	1
CAMTA1-DT	0.000309118	0.18896	0.071	0.003	1
KAZN-AS1	0.0003207	0.0958506	0.071	0.003	1
AL137802.2	0.0003207	0.0958506	0.071	0.003	1
NCMAP-DT	0.0003207	0.0958506	0.071	0.003	1
AL136115.2	0.0003207	0.0958506	0.071	0.003	1
FNDC7	0.0003207	0.0958506	0.071	0.003	1
TAFA3	0.0003207	0.0958506	0.071	0.003	1
BRINP3	0.0003207	0.0958506	0.071	0.003	1
PROX1	0.0003207	0.0958506	0.071	0.003	1
LINC01655	0.0003207	0.0958506	0.071	0.003	1
AL732292.2	0.0003207	0.0958506	0.071	0.003	1
AC013403.2	0.0003207	0.0958506	0.071	0.003	1
UCN	0.0003207	0.0958506	0.071	0.003	1
AC012370.2	0.0003207	0.0958506	0.071	0.003	1
DES	0.0003207	0.0958506	0.071	0.003	1
LINC01937	0.0003207	0.0958506	0.071	0.003	1
FAM3D-AS1	0.0003207	0.0958506	0.071	0.003	1
SLC15A2	0.0003207	0.0958506	0.071	0.003	1
AC078802.1	0.0003207	0.0958506	0.071	0.003	1
ST6GAL1	0.0003207	0.0958506	0.071	0.003	1
LPP-AS1	0.0003207	0.0958506	0.071	0.003	1
AC073365.1	0.0003207	0.0958506	0.071	0.003	1
AC107068.1	0.0003207	0.0958506	0.071	0.003	1
AC015631.1	0.0003207	0.0958506	0.071	0.003	1
AC034231.1	0.0003207	0.0958506	0.071	0.003	1
GCNT4	0.0003207	0.0958506	0.071	0.003	1
AC106786.2	0.0003207	0.0958506	0.071	0.003	1
SH3TC2-DT	0.0003207	0.0958506	0.071	0.003	1
GPRIN1	0.0003207	0.0958506	0.071	0.003	1
HIST1H4L	0.0003207	0.0958506	0.071	0.003	1
AL645939.5	0.0003207	0.0958506	0.071	0.003	1
KIF6	0.0003207	0.0958506	0.071	0.003	1
Z99289.1	0.0003207	0.0958506	0.071	0.003	1
AL390955.2	0.0003207	0.0958506	0.071	0.003	1
AC147651.1	0.0003207	0.0958506	0.071	0.003	1
GCK	0.0003207	0.0958506	0.071	0.003	1
C7orf57	0.0003207	0.0958506	0.071	0.003	1
SLC12A9-AS1	0.0003207	0.0958506	0.071	0.003	1
UPK3BL2	0.0003207	0.0958506	0.071	0.003	1
AC005050.1	0.0003207	0.0958506	0.071	0.003	1
AC006387.1	0.0003207	0.0958506	0.071	0.003	1
AC018616.1	0.0003207	0.0958506	0.071	0.003	1
AC104316.2	0.0003207	0.0958506	0.071	0.003	1
LRRC19	0.0003207	0.0958506	0.071	0.003	1
AL162390.1	0.0003207	0.0958506	0.071	0.003	1
AL691447.2	0.0003207	0.0958506	0.071	0.003	1
LINC00706	0.0003207	0.0958506	0.071	0.003	1
AL392046.1	0.0003207	0.0958506	0.071	0.003	1
SGMS1-AS1	0.0003207	0.0958506	0.071	0.003	1
CALCB	0.0003207	0.0958506	0.071	0.003	1
AP001885.2	0.0003207	0.0958506	0.071	0.003	1
HEPHL1	0.0003207	0.0958506	0.071	0.003	1
AC021054.1	0.0003207	0.0958506	0.071	0.003	1
AC005414.1	0.0003207	0.0958506	0.071	0.003	1
SLC15A5	0.0003207	0.0958506	0.071	0.003	1
ABCD2	0.0003207	0.0958506	0.071	0.003	1
AC126178.1	0.0003207	0.0958506	0.071	0.003	1
THRIL	0.0003207	0.0958506	0.071	0.003	1
LINC02361	0.0003207	0.0958506	0.071	0.003	1
LINC00355	0.0003207	0.0958506	0.071	0.003	1
AL354811.1	0.0003207	0.0958506	0.071	0.003	1
AL442067.3	0.0003207	0.0958506	0.071	0.003	1
AL135978.2	0.0003207	0.0958506	0.071	0.003	1
SLC24A4	0.0003207	0.0958506	0.071	0.003	1
AC123768.5	0.0003207	0.0958506	0.071	0.003	1
AC023355.1	0.0003207	0.0958506	0.071	0.003	1
LINC02129	0.0003207	0.0958506	0.071	0.003	1
AC012645.1	0.0003207	0.0958506	0.071	0.003	1
TRIM72	0.0003207	0.0958506	0.071	0.003	1
AC020978.5	0.0003207	0.0958506	0.071	0.003	1
MYH1	0.0003207	0.0958506	0.071	0.003	1
TIAF1	0.0003207	0.0958506	0.071	0.003	1
HOXB8	0.0003207	0.0958506	0.071	0.003	1
GNA15	0.0003207	0.0958506	0.071	0.003	1
AC010320.2	0.0003207	0.0958506	0.071	0.003	1
TTYH1	0.0003207	0.0958506	0.071	0.003	1
FP565260.6	0.0003207	0.0958506	0.071	0.003	1
FP671120.4	0.0003207	0.0958506	0.071	0.003	1
TSPEAR-AS1	0.0003207	0.0958506	0.071	0.003	1
TNFRSF13C	0.0003207	0.0958506	0.071	0.003	1
AL033543.1	0.0003207	0.0958506	0.071	0.003	1
REPS2	0.0003207	0.0958506	0.071	0.003	1
SPIN2A	0.0003207	0.0958506	0.071	0.003	1
PART1	0.000332715	0.092175	0.071	0.003	1
AC016769.5	0.000332715	0.092175	0.071	0.003	1
IGF1	0.000332715	0.092175	0.071	0.003	1
LINC01841	0.000332715	0.0848516	0.071	0.003	1
PEX10	0.000378348	0.384717	0.643	0.212	1
SLFN11	0.000441069	0.53154	0.714	0.269	1
MYO7B	0.000460349	0.276627	0.286	0.054	1
ZNF441	0.000460353	0.273155	0.286	0.054	1
CMTR2	0.000503305	0.457895	0.357	0.084	1
TMEM225B	0.000574829	0.311817	0.214	0.033	1
AL079338.1	0.000644481	0.276627	0.286	0.056	1
N4BP2	0.000647881	0.411352	0.429	0.12	1
THEMIS2	0.000677319	0.229355	0.214	0.033	1
TRPV4	0.00070371	0.225797	0.214	0.033	1
AC136604.2	0.00072726	0.254508	0.143	0.015	1
POLE	0.000761575	0.327936	0.429	0.115	1
AC008467.1	0.000779609	0.170675	0.143	0.015	1
C6orf99	0.000779609	0.170675	0.143	0.015	1
ST7-OT4	0.000779609	0.170675	0.143	0.015	1
AC012615.1	0.000779609	0.170675	0.143	0.015	1
ZNF829	0.000779609	0.170675	0.143	0.015	1
HNRNPF	0.000780028	0.530301	1	0.882	1
CPSF1	0.000798957	0.45897	0.429	0.125	1
TAFA1	0.000807473	0.167045	0.143	0.015	1
FUOM	0.000807473	0.167045	0.143	0.015	1
STK31	0.000952635	0.269691	0.286	0.059	1
TCTN3	0.000968664	0.368284	0.571	0.194	1
ARHGAP39	0.00109567	0.229355	0.214	0.036	1
PANK1	0.00113579	0.225797	0.214	0.036	1
GSEC	0.00113579	0.225797	0.214	0.036	1
KHNYN	0.0011935	0.384131	0.357	0.095	1
ADAMTS1	0.00124348	0.48463	0.5	0.164	1
LINC00862	0.00126994	0.262788	0.286	0.061	1
TBXAS1	0.00131377	0.31013	0.357	0.092	1
L2HGDH	0.00131873	0.266236	0.286	0.061	1
TRAPPC8	0.00133026	0.386585	0.5	0.164	1
CCDC136	0.0014506	0.337695	0.429	0.128	1
TRAFD1	0.0015403	0.29671	0.357	0.092	1
APBB1IP	0.00168259	0.46436	0.857	0.473	1
AL078604.4	0.00169039	0.254508	0.143	0.018	1
ZNF675	0.00170909	0.29671	0.357	0.095	1
ZNF649	0.00174047	0.225797	0.214	0.038	1
PLXDC2	0.00174249	0.484881	0.429	0.136	1
MASTL	0.00174736	0.528663	0.5	0.189	1
AL022068.1	0.00178558	0.262788	0.286	0.064	1
VAT1L	0.00186184	0.215176	0.214	0.038	1
SLC12A8	0.00188316	0.167045	0.143	0.018	1
EPHA5-AS1	0.00188316	0.167045	0.143	0.018	1
C19orf33	0.00188316	0.167045	0.143	0.018	1
STARD7	0.00194216	0.53154	0.643	0.325	1
PIM1	0.00194249	0.163425	0.143	0.018	1
FILIP1	0.00194249	0.163425	0.143	0.018	1
GDPD3	0.00194249	0.163425	0.143	0.018	1
CCNL2	0.00198735	0.452649	0.714	0.322	1
ZNFX1	0.00198901	0.326464	0.571	0.202	1
KCTD21-AS1	0.0020034	0.159814	0.143	0.018	1
PAQR8	0.00200341	0.156211	0.143	0.018	1
AFDN	0.0020261	0.368041	0.714	0.297	1
SAP18	0.00205932	-0.581761	0.929	0.997	1
CECR2	0.00213023	0.110183	0.143	0.018	1
BCL9	0.00213336	0.269691	0.286	0.066	1
PIK3R3	0.00214341	0.357414	0.357	0.1	1
MICU3	0.00217971	0.48612	0.857	0.437	1
AC096537.1	0.00219549	0.293374	0.357	0.097	1
ALG8	0.00225898	0.359451	0.786	0.338	1
IQCJ-SCHIP1	0.00234395	0.435239	0.786	0.355	1
CEP152	0.00237998	0.42863	0.571	0.225	1
DCAF15	0.00238267	0.438489	0.5	0.184	1
EML3	0.0023904	0.337352	0.286	0.069	1
ZFP36	0.00245096	0.411352	0.5	0.179	1
AC011043.1	0.00245374	0.252496	0.286	0.066	1
CEP85L	0.00250202	0.408607	0.643	0.263	1
ZNF687-AS1	0.00263583	0.222248	0.214	0.041	1
EIF4EBP3	0.00263583	0.222248	0.214	0.041	1
ZNF510	0.00263583	0.222248	0.214	0.041	1
ZNF674	0.00263583	0.222248	0.214	0.041	1
PPP4C	0.00266075	0.442213	1	0.931	1
PIGZ	0.00279174	0.266236	0.286	0.069	1
FAM160B2	0.00279174	0.266236	0.286	0.069	1
DOK1	0.0028141	0.387653	0.571	0.225	1
PROSER1	0.00288815	0.262788	0.286	0.069	1
S100A13	0.00301211	-0.483186	1	1	1
IREB2	0.00307888	0.383008	0.643	0.271	1
PRMT9	0.00319457	0.367375	0.357	0.107	1
ZNF598	0.00325994	0.290046	0.357	0.102	1
PHF20	0.0033336	0.444164	0.929	0.575	1
TESK2	0.00333962	0.297638	0.214	0.043	1
PHKA2	0.00337821	0.270238	0.357	0.102	1
ABCB1	0.00358343	0.287094	0.214	0.043	1
ITGB1BP1	0.00369331	0.470028	1	0.967	1
SGO1	0.00373794	0.518268	0.5	0.192	1
OPN3	0.00382176	0.430211	0.429	0.153	1
RHD	0.00383061	0.163425	0.143	0.02	1
CSF1R	0.00383061	0.163425	0.143	0.02	1
LINC01504	0.00383061	0.163425	0.143	0.02	1
ZNF799	0.00383061	0.163425	0.143	0.02	1
ZNF658	0.00383273	0.218707	0.214	0.043	1
SNX33	0.00383273	0.218707	0.214	0.043	1
ZNF790-AS1	0.00383273	0.218707	0.214	0.043	1
FEM1A	0.00383577	0.255918	0.286	0.072	1
ZNF264	0.00383577	0.255918	0.286	0.072	1
PIGW	0.00383578	0.249081	0.286	0.072	1
PARP16	0.00390673	0.446118	0.214	0.046	1
FMR1NB	0.00390858	0.207819	0.357	0.095	1
AC009961.1	0.00393835	0.159814	0.143	0.02	1
AC058791.1	0.00393835	0.159814	0.143	0.02	1
ZNF793	0.00393835	0.159814	0.143	0.02	1
SNAI1	0.00393835	0.159814	0.143	0.02	1
BARD1	0.00400781	0.651179	0.714	0.381	1
SCN3A	0.00406976	0.211653	0.214	0.043	1
PDGFD	0.0041614	0.152618	0.143	0.02	1
AC022098.1	0.00420725	0.354109	0.357	0.11	1
CLN8	0.00435023	0.260435	0.357	0.105	1
MEPCE	0.0043827	0.305419	0.429	0.143	1
WNT9A	0.00440644	0.185284	0.071	0.005	1
PSG6	0.00440644	0.185284	0.071	0.005	1
CDC7	0.00441293	0.404824	0.357	0.113	1
DNM3OS	0.0044253	0.344238	0.429	0.146	1
AL109811.2	0.00462768	0.092175	0.071	0.005	1
AL391650.1	0.00462768	0.092175	0.071	0.005	1
CCDC30	0.00462768	0.092175	0.071	0.005	1
AL355488.1	0.00462768	0.092175	0.071	0.005	1
INKA2-AS1	0.00462768	0.092175	0.071	0.005	1
AC239868.1	0.00462768	0.092175	0.071	0.005	1
PAQR6	0.00462768	0.092175	0.071	0.005	1
F11R	0.00462768	0.092175	0.071	0.005	1
COLGALT2	0.00462768	0.092175	0.071	0.005	1
SIPA1L2	0.00462768	0.092175	0.071	0.005	1
AC009975.1	0.00462768	0.092175	0.071	0.005	1
LGALSL-DT	0.00462768	0.092175	0.071	0.005	1
AC092835.1	0.00462768	0.092175	0.071	0.005	1
AC019197.1	0.00462768	0.092175	0.071	0.005	1
PLCD4	0.00462768	0.092175	0.071	0.005	1
AC067956.1	0.00462768	0.092175	0.071	0.005	1
RBM44	0.00462768	0.092175	0.071	0.005	1
FANCD2OS	0.00462768	0.092175	0.071	0.005	1
CELSR3	0.00462768	0.092175	0.071	0.005	1
AC116036.2	0.00462768	0.092175	0.071	0.005	1
AC083799.1	0.00462768	0.092175	0.071	0.005	1
AC106892.1	0.00462768	0.092175	0.071	0.005	1
AC133530.1	0.00462768	0.092175	0.071	0.005	1
FGA	0.00462768	0.092175	0.071	0.005	1
LINC02269	0.00462768	0.092175	0.071	0.005	1
LINC02362	0.00462768	0.092175	0.071	0.005	1
CTNND2	0.00462768	0.092175	0.071	0.005	1
AC034232.2	0.00462768	0.092175	0.071	0.005	1
LINC01949	0.00462768	0.092175	0.071	0.005	1
PITX1	0.00462768	0.092175	0.071	0.005	1
PCDHGA4	0.00462768	0.092175	0.071	0.005	1
IRGM	0.00462768	0.092175	0.071	0.005	1
AC136604.3	0.00462768	0.092175	0.071	0.005	1
TSBP1-AS1	0.00462768	0.092175	0.071	0.005	1
AL121933.2	0.00462768	0.092175	0.071	0.005	1
AL589693.1	0.00462768	0.092175	0.071	0.005	1
SLC29A4	0.00462768	0.092175	0.071	0.005	1
AC004837.4	0.00462768	0.092175	0.071	0.005	1
LINC00957	0.00462768	0.092175	0.071	0.005	1
GJC3	0.00462768	0.092175	0.071	0.005	1
FGF20	0.00462768	0.092175	0.071	0.005	1
CLVS1	0.00462768	0.092175	0.071	0.005	1
AC064802.1	0.00462768	0.092175	0.071	0.005	1
UBE2R2-AS1	0.00462768	0.092175	0.071	0.005	1
MYORG	0.00462768	0.092175	0.071	0.005	1
LINC01474	0.00462768	0.092175	0.071	0.005	1
AL590226.2	0.00462768	0.092175	0.071	0.005	1
IL15RA	0.00462768	0.092175	0.071	0.005	1
AL135791.1	0.00462768	0.092175	0.071	0.005	1
AL353801.3	0.00462768	0.092175	0.071	0.005	1
AC010997.5	0.00462768	0.092175	0.071	0.005	1
AL136119.1	0.00462768	0.092175	0.071	0.005	1
AC137894.3	0.00462768	0.092175	0.071	0.005	1
PPFIBP2	0.00462768	0.092175	0.071	0.005	1
AC116535.1	0.00462768	0.092175	0.071	0.005	1
AC021269.3	0.00462768	0.092175	0.071	0.005	1
AP000759.1	0.00462768	0.092175	0.071	0.005	1
TAS2R30	0.00462768	0.092175	0.071	0.005	1
PLBD1	0.00462768	0.092175	0.071	0.005	1
NDUFA4L2	0.00462768	0.092175	0.071	0.005	1
USP30-AS1	0.00462768	0.092175	0.071	0.005	1
AL445647.1	0.00462768	0.092175	0.071	0.005	1
AL139353.2	0.00462768	0.092175	0.071	0.005	1
AC004974.1	0.00462768	0.092175	0.071	0.005	1
DICER1-AS1	0.00462768	0.092175	0.071	0.005	1
DISP2	0.00462768	0.092175	0.071	0.005	1
ELL3	0.00462768	0.092175	0.071	0.005	1
AC040173.1	0.00462768	0.092175	0.071	0.005	1
AC135048.3	0.00462768	0.092175	0.071	0.005	1
LINC02133	0.00462768	0.092175	0.071	0.005	1
ADGRG5	0.00462768	0.092175	0.071	0.005	1
LINC02087	0.00462768	0.092175	0.071	0.005	1
AC079915.1	0.00462768	0.092175	0.071	0.005	1
HIGD1B	0.00462768	0.092175	0.071	0.005	1
AC091133.1	0.00462768	0.092175	0.071	0.005	1
AC100786.1	0.00462768	0.092175	0.071	0.005	1
MGAT5B	0.00462768	0.092175	0.071	0.005	1
JSRP1	0.00462768	0.092175	0.071	0.005	1
AC010615.2	0.00462768	0.092175	0.071	0.005	1
AC010325.1	0.00462768	0.092175	0.071	0.005	1
GNRH2	0.00462768	0.092175	0.071	0.005	1
HM13-AS1	0.00462768	0.092175	0.071	0.005	1
AL133227.1	0.00462768	0.092175	0.071	0.005	1
CASS4	0.00462768	0.092175	0.071	0.005	1
AP000254.2	0.00462768	0.092175	0.071	0.005	1
RFPL3S	0.00462768	0.092175	0.071	0.005	1
Z82217.1	0.00462768	0.092175	0.071	0.005	1
KCNJ4	0.00462768	0.092175	0.071	0.005	1
PNPLA4	0.00462768	0.092175	0.071	0.005	1
GPR34	0.00462768	0.092175	0.071	0.005	1
LIN7C	0.00463204	0.43802	0.643	0.312	1
MCM10	0.00463298	0.325623	0.429	0.143	1
CENPU	0.00471523	0.608119	0.571	0.261	1
AC110609.1	0.00474241	0.0885087	0.071	0.005	1
LINC02102	0.00474241	0.0885087	0.071	0.005	1
ITGB8	0.00474241	0.0885087	0.071	0.005	1
DCDC1	0.00474241	0.0885087	0.071	0.005	1
CCDC73	0.00474241	0.0885087	0.071	0.005	1
PGR-AS1	0.00474241	0.0848516	0.071	0.005	1
CUX2	0.00474241	0.0812039	0.071	0.005	1
AC025917.1	0.00474241	0.0885087	0.071	0.005	1
AP001033.3	0.00474241	0.0885087	0.071	0.005	1
ZC3H18	0.00487075	0.423673	0.786	0.389	1
TACO1	0.00512775	0.391139	0.714	0.335	1
CDC73	0.0052069	-0.661536	0.214	0.575	1
ZHX1	0.00529458	0.341618	0.714	0.32	1
SLC9A1	0.0053009	0.35922	0.5	0.192	1
HS6ST1	0.00538188	0.215176	0.214	0.046	1
MOCS3	0.00538188	0.215176	0.214	0.046	1
TSKU	0.00553739	0.211653	0.214	0.046	1
PLEKHG2	0.00554743	0.27681	0.357	0.11	1
YTHDF1	0.00554743	0.27681	0.357	0.11	1
GDAP2	0.0055615	0.299049	0.429	0.148	1
MARK1	0.00566528	0.228761	0.286	0.074	1
DEPDC7	0.00566535	0.225402	0.286	0.074	1
BTBD8	0.00587305	0.242276	0.286	0.077	1
ZNF518B	0.00605426	0.245674	0.286	0.077	1
KANTR	0.00605426	0.245674	0.286	0.077	1
SLC66A2	0.00612764	0.399948	0.571	0.253	1
SMCHD1	0.00613625	0.539937	0.929	0.57	1
PTPN9	0.00620791	0.555742	0.5	0.233	1
NCAPH	0.00625379	0.466145	0.429	0.153	1
CLEC2D	0.00643071	0.238885	0.286	0.077	1
VEZF1	0.00655028	0.414103	0.571	0.258	1
USP36	0.006679	0.338006	0.429	0.153	1
RIPOR1	0.0067582	0.519638	0.571	0.284	1
ELF2	0.00678433	0.385001	0.857	0.442	1
CLOCK	0.00680454	0.453173	0.714	0.384	1
GINM1	0.00685695	0.470046	0.929	0.637	1
NANP	0.00686648	0.327084	0.286	0.082	1
MEIS1-AS2	0.00687308	0.159814	0.143	0.023	1
GLB1L	0.00687308	0.159814	0.143	0.023	1
AC097634.3	0.00687308	0.159814	0.143	0.023	1
ZNF300	0.00687308	0.159814	0.143	0.023	1
AC092338.3	0.00687308	0.159814	0.143	0.023	1
NT5M	0.00687308	0.159814	0.143	0.023	1
AC114689.3	0.00687308	0.159814	0.143	0.023	1
LINC02595	0.00687308	0.159814	0.143	0.023	1
DCK	0.00691571	0.508709	0.571	0.281	1
CHAF1B	0.00696195	0.263695	0.357	0.113	1
TMCC2	0.00704744	0.152618	0.143	0.023	1
RNPC3	0.00721957	0.334435	0.357	0.118	1
RERGL	0.00722541	0.138334	0.143	0.023	1
ZNF213-AS1	0.00724462	0.245674	0.286	0.079	1
SLC44A2	0.0072496	0.405639	0.571	0.248	1
RAB22A	0.00730804	0.442482	0.714	0.389	1
FRA10AC1	0.0073631	0.351825	0.714	0.34	1
PITRM1	0.00738774	0.325237	0.643	0.284	1
PRKDC	0.0074777	0.590323	1	0.923	1
ZNF317	0.00753323	0.208138	0.214	0.049	1
EPB41L2	0.00755481	0.566631	0.786	0.575	1
XRRA1	0.00767636	0.492468	0.571	0.299	1
NDUFA3	0.00770078	-0.62952	0.571	0.862	1
SLC25A21	0.00773869	0.204632	0.214	0.049	1
OTUD4	0.00776205	0.397111	0.571	0.248	1
YWHAB	0.00778154	0.281363	1	1	1
LRRC42	0.00781935	0.507568	0.714	0.427	1
LGMN	0.00794246	-0.663456	0.214	0.552	1
MME	0.00805379	0.60573	0.643	0.33	1
SNHG6	0.00809875	0.398752	1	0.926	1
TNFRSF9	0.00838314	0.173456	0.214	0.049	1
TRIM66	0.00843375	0.287094	0.214	0.051	1
PMAIP1	0.00867776	0.327336	0.643	0.309	1
FHAD1	0.00873009	0.280108	0.214	0.051	1
AL365203.2	0.00883415	0.242276	0.286	0.082	1
FAM107B	0.0090248	0.38613	0.643	0.32	1
GATAD2A	0.00907445	0.413644	0.714	0.417	1
TGS1	0.0090886	-0.588648	0.071	0.422	1
MAP3K2	0.00916176	0.435239	0.714	0.386	1
HELLS	0.00925589	0.879221	0.714	0.422	1
CDKAL1	0.00931266	0.353008	0.786	0.417	1
LINC00964	0.00934439	0.234614	0.286	0.079	1
DUSP4	0.00935379	0.422848	0.714	0.376	1
POLR3GL	0.00943382	-0.580034	0.143	0.491	1
STEAP3	0.00956822	0.327936	0.357	0.123	1
SLC46A3	0.00961658	0.235503	0.286	0.082	1
ZNF582-AS1	0.00961669	0.228761	0.286	0.082	1
MTBP	0.00964786	0.27352	0.357	0.12	1
VIM	0.00966276	0.243181	1	1	1
NBPF3	0.00973	0.208138	0.214	0.051	1
PARP11	0.00973	0.208138	0.214	0.051	1
POLR3H	0.00984045	0.392974	0.643	0.33	1
CWF19L1	0.009945	0.270238	0.357	0.12	1
SYAP1	0.0103043	0.582047	0.929	0.854	1
NRBF2	0.010396	0.473521	0.857	0.504	1
UBR3	0.0104527	0.384613	0.714	0.373	1
REPS1	0.0106153	0.550129	0.5	0.261	1
USF2	0.0106345	0.332364	0.5	0.21	1
MEGF9	0.0106567	0.276975	0.429	0.161	1
IGFBP7	0.0106597	-0.562954	1	1	1
GRID2	0.0107315	0.297638	0.143	0.026	1
DDIT4	0.0107486	0.182432	0.286	0.082	1
DCAKD	0.010833	0.289548	0.429	0.164	1
ZGRF1	0.0108819	0.260435	0.357	0.12	1
CPLANE2	0.0112201	0.156211	0.143	0.026	1
AC012360.3	0.0112201	0.156211	0.143	0.026	1
DARS-AS1	0.0112201	0.156211	0.143	0.026	1
AC010136.1	0.0112201	0.156211	0.143	0.026	1
MAK	0.0112201	0.156211	0.143	0.026	1
HIST1H3E	0.0112201	0.156211	0.143	0.026	1
AL356599.1	0.0112201	0.156211	0.143	0.026	1
C9orf24	0.0112201	0.156211	0.143	0.026	1
LINC02445	0.0112201	0.156211	0.143	0.026	1
MAN2A1	0.0113684	0.439097	0.714	0.384	1
ERBB4	0.011477	0.276627	0.214	0.054	1
IBA57	0.011479	0.149034	0.143	0.026	1
AL391840.3	0.011479	0.152618	0.143	0.026	1
MID2	0.011479	0.152618	0.143	0.026	1
CXorf40A	0.011479	0.152618	0.143	0.026	1
RPL39L	0.0115179	0.491485	1	0.65	1
POM121C	0.0116348	0.449053	0.5	0.228	1
CAVIN2	0.0117426	0.149034	0.143	0.026	1
KCNIP4	0.0117426	0.149034	0.143	0.026	1
RAC3	0.0119937	0.311817	0.357	0.125	1
EIF3B	0.0120574	0.291353	0.857	0.445	1
SERAC1	0.0120825	0.313505	0.286	0.09	1
SETX	0.0121074	0.324201	0.714	0.33	1
ETS1	0.0121367	0.50155	0.714	0.442	1
TRPM7	0.0124757	0.336691	0.714	0.366	1
LAMTOR5-AS1	0.0126173	0.204632	0.214	0.054	1
ZNF71	0.0126173	0.204632	0.214	0.054	1
BCDIN3D	0.0127355	0.238885	0.286	0.087	1
PDZD2	0.0129303	0.197646	0.214	0.054	1
USP49	0.0129303	0.201135	0.214	0.054	1
ZCCHC10	0.012975	-0.481732	0	0.315	1
ZYG11A	0.0132495	0.197646	0.214	0.054	1
DRG2	0.0133582	0.392974	0.643	0.33	1
C19orf48	0.0134001	0.351543	0.643	0.307	1
ZNF41	0.0135372	0.283597	0.214	0.056	1
DNMBP	0.013652	0.381605	0.786	0.45	1
NT5C	0.013768	-0.53684	0.571	0.775	1
DPY19L4	0.0139434	0.261412	0.429	0.164	1
SPC24	0.0141424	0.456004	0.5	0.238	1
USP1	0.0142576	0.498485	0.714	0.458	1
AC009107.2	0.0146203	0.305419	0.357	0.13	1
STAT2	0.014624	0.285822	0.5	0.21	1
TRAF2	0.0146692	0.250697	0.357	0.125	1
ARID3A	0.0146694	0.244242	0.357	0.125	1
FANCB	0.0146789	0.362235	0.429	0.179	1
PLCL2	0.0147065	0.371318	0.429	0.182	1
MGST2	0.0149335	0.259349	0.857	0.427	1
XRCC3	0.0149426	0.303405	0.286	0.092	1
TNFRSF11B	0.0149514	0.857251	0.429	0.197	1
RFX3	0.0150736	0.265922	0.5	0.205	1
ANXA10	0.0150763	0.286094	0.429	0.169	1
KANSL1-AS1	0.0150799	0.235503	0.286	0.09	1
SHOX2	0.0151189	0.263101	0.571	0.251	1
STAG1	0.0151325	0.507428	0.929	0.67	1
INSYN2B	0.0152726	0.324201	0.643	0.322	1
AKAP8	0.0153114	0.371318	0.429	0.182	1
MRPS15	0.0154299	0.406078	1	0.88	1
FAM160B1	0.0155444	-0.430634	0	0.302	1
WASHC2A	0.0155793	0.398915	0.429	0.179	1
LRRC23	0.015598	0.372253	0.643	0.343	1
S100A2	0.0156097	0.440064	0.643	0.348	1
THUMPD2	0.0157317	0.346501	0.786	0.419	1
CEP350	0.0158192	0.407065	0.786	0.468	1
MED24	0.0159798	0.441535	0.429	0.187	1
RFC2	0.0160657	0.432982	0.714	0.389	1
PGBD2	0.0162903	0.225402	0.286	0.09	1
CMTM6	0.016353	-0.544075	0.214	0.552	1
LIG1	0.0164715	0.294435	0.5	0.217	1
MGME1	0.0164808	0.378748	0.571	0.271	1
KIF3B	0.0164889	0.316404	0.429	0.176	1
SOS1	0.0165103	0.686694	0.714	0.463	1
SUV39H2	0.0165382	0.427051	0.357	0.146	1
SLC31A1	0.0166085	0.24762	0.5	0.212	1
L3MBTL1	0.0167977	0.190693	0.214	0.056	1
CEP112	0.0170265	0.396706	0.643	0.335	1
AL359504.2	0.0170275	0.152618	0.143	0.028	1
PPM1J	0.0170275	0.152618	0.143	0.028	1
SLAMF9	0.0170275	0.152618	0.143	0.028	1
CACNA2D3	0.0170275	0.152618	0.143	0.028	1
STIM2-AS1	0.0170275	0.152618	0.143	0.028	1
AC025171.2	0.0170275	0.152618	0.143	0.028	1
CCDC200	0.0170275	0.152618	0.143	0.028	1
ZNF653	0.0170275	0.152618	0.143	0.028	1
SHROOM4	0.0170275	0.152618	0.143	0.028	1
PNKD	0.0170798	0.39661	0.929	0.803	1
GCC2-AS1	0.0171913	0.190693	0.214	0.056	1
CC2D2B	0.0172709	0.181618	0.071	0.008	1
CT55	0.0172709	0.181618	0.071	0.008	1
AC073091.3	0.0172714	0.347886	0.071	0.008	1
NTS	0.0172714	1.38741	0.071	0.008	1
ZNF181	0.0172853	0.276627	0.214	0.059	1
SOWAHC	0.0173874	0.145458	0.143	0.028	1
ST7-AS1	0.0173874	0.149034	0.143	0.028	1
VWA5A	0.0173874	0.145458	0.143	0.028	1
MYH11	0.0173874	0.149034	0.143	0.028	1
SGCA	0.0173874	0.138334	0.143	0.028	1
PEX11G	0.0173874	0.149034	0.143	0.028	1
PRDM5	0.0175097	0.31947	0.429	0.179	1
CERS2	0.0175375	0.314109	0.786	0.442	1
PRKRA	0.0176226	0.381605	0.786	0.512	1
MIR181A2HG	0.0176457	0.304864	0.571	0.266	1
LSM4	0.0176943	0.444186	1	0.939	1
SIMC1	0.017788	0.308614	0.357	0.136	1
CDCA7	0.0179379	0.293374	0.286	0.095	1
BAG5	0.0179406	0.33639	0.643	0.338	1
CHMP2B	0.017966	-0.585658	0.5	0.729	1
NAT9	0.0180331	0.325623	0.429	0.182	1
TBRG4	0.0182026	0.387023	0.714	0.412	1
FBXO6	0.0182473	0.0885087	0.071	0.008	1
AL451042.1	0.0182473	0.0885087	0.071	0.008	1
AL445253.1	0.0182473	0.0885087	0.071	0.008	1
AC098484.4	0.0182473	0.0885087	0.071	0.008	1
AC093425.1	0.0182473	0.0885087	0.071	0.008	1
SLC6A17	0.0182473	0.0885087	0.071	0.008	1
HIST2H4A	0.0182473	0.0885087	0.071	0.008	1
AL592295.4	0.0182473	0.0885087	0.071	0.008	1
C1orf226	0.0182473	0.0885087	0.071	0.008	1
AL606489.1	0.0182473	0.0885087	0.071	0.008	1
AL596330.1	0.0182473	0.0885087	0.071	0.008	1
OR2AJ1	0.0182473	0.0885087	0.071	0.008	1
AC104695.4	0.0182473	0.0885087	0.071	0.008	1
AC006369.1	0.0182473	0.0885087	0.071	0.008	1
AC079305.3	0.0182473	0.0885087	0.071	0.008	1
AC012462.3	0.0182473	0.0885087	0.071	0.008	1
AC079834.2	0.0182473	0.0885087	0.071	0.008	1
LINC02035	0.0182473	0.0885087	0.071	0.008	1
PAQR9-AS1	0.0182473	0.0885087	0.071	0.008	1
PLCH1	0.0182473	0.0885087	0.071	0.008	1
AC024560.4	0.0182473	0.0885087	0.071	0.008	1
MIR4453HG	0.0182473	0.0885087	0.071	0.008	1
AC012629.2	0.0182473	0.0885087	0.071	0.008	1
AC008522.1	0.0182473	0.0885087	0.071	0.008	1
LMNB1-DT	0.0182473	0.0885087	0.071	0.008	1
Z97832.2	0.0182473	0.0885087	0.071	0.008	1
AL024508.1	0.0182473	0.0885087	0.071	0.008	1
AC007130.1	0.0182473	0.0885087	0.071	0.008	1
NACAD	0.0182473	0.0885087	0.071	0.008	1
AC073349.4	0.0182473	0.0885087	0.071	0.008	1
SPDYE5	0.0182473	0.0885087	0.071	0.008	1
AC091182.2	0.0182473	0.0885087	0.071	0.008	1
AC100821.2	0.0182473	0.0885087	0.071	0.008	1
FSBP	0.0182473	0.0885087	0.071	0.008	1
EPB41L4B	0.0182473	0.0885087	0.071	0.008	1
AL138760.1	0.0182473	0.0885087	0.071	0.008	1
ABCC2	0.0182473	0.0885087	0.071	0.008	1
AL133215.2	0.0182473	0.0885087	0.071	0.008	1
HMX2	0.0182473	0.0885087	0.071	0.008	1
AL731769.2	0.0182473	0.0885087	0.071	0.008	1
AC100763.1	0.0182473	0.0885087	0.071	0.008	1
AC103974.1	0.0182473	0.0885087	0.071	0.008	1
AC006064.2	0.0182473	0.0885087	0.071	0.008	1
LOH12CR2	0.0182473	0.0885087	0.071	0.008	1
GRIN2B	0.0182473	0.0885087	0.071	0.008	1
CYP27B1	0.0182473	0.0885087	0.071	0.008	1
MYO1H	0.0182473	0.0885087	0.071	0.008	1
AL355001.1	0.0182473	0.0885087	0.071	0.008	1
AL356495.1	0.0182473	0.0885087	0.071	0.008	1
AL161430.1	0.0182473	0.0885087	0.071	0.008	1
AL133372.2	0.0182473	0.0885087	0.071	0.008	1
AC005225.3	0.0182473	0.0885087	0.071	0.008	1
AC016526.2	0.0182473	0.0885087	0.071	0.008	1
VASH1	0.0182473	0.0885087	0.071	0.008	1
RHOV	0.0182473	0.0885087	0.071	0.008	1
AC010931.3	0.0182473	0.0885087	0.071	0.008	1
TMEM266	0.0182473	0.0885087	0.071	0.008	1
GOLGA6L9	0.0182473	0.0885087	0.071	0.008	1
SRRM2-AS1	0.0182473	0.0885087	0.071	0.008	1
AC007014.1	0.0182473	0.0885087	0.071	0.008	1
AC106739.1	0.0182473	0.0885087	0.071	0.008	1
AC130343.2	0.0182473	0.0885087	0.071	0.008	1
PROCA1	0.0182473	0.0885087	0.071	0.008	1
CORO6	0.0182473	0.0885087	0.071	0.008	1
CNTD1	0.0182473	0.0885087	0.071	0.008	1
AC036222.1	0.0182473	0.0885087	0.071	0.008	1
AC005972.3	0.0182473	0.0885087	0.071	0.008	1
AC005944.1	0.0182473	0.0885087	0.071	0.008	1
ZNF177	0.0182473	0.0885087	0.071	0.008	1
ZNF878	0.0182473	0.0885087	0.071	0.008	1
AC011462.5	0.0182473	0.0885087	0.071	0.008	1
CEACAM1	0.0182473	0.0885087	0.071	0.008	1
ZNF575	0.0182473	0.0885087	0.071	0.008	1
AC010524.1	0.0182473	0.0885087	0.071	0.008	1
AL109614.1	0.0182473	0.0885087	0.071	0.008	1
SAMD10	0.0182473	0.0885087	0.071	0.008	1
KCNE1	0.0182473	0.0885087	0.071	0.008	1
ITGB2	0.0182473	0.0885087	0.071	0.008	1
LINC01311	0.0182473	0.0885087	0.071	0.008	1
AC003681.1	0.0182473	0.0885087	0.071	0.008	1
GK-AS1	0.0182473	0.0885087	0.071	0.008	1
ODR4	0.0182666	-0.436099	0	0.292	1
UCA1	0.0183774	0.968301	0.5	0.251	1
AGK	0.0185045	0.271175	0.5	0.217	1
AL512353.1	0.0185848	0.0848516	0.071	0.008	1
AC104088.1	0.0185848	0.0848516	0.071	0.008	1
AC116565.1	0.0185848	0.0848516	0.071	0.008	1
AC138409.3	0.0185848	0.0848516	0.071	0.008	1
FREM1	0.0185848	0.0848516	0.071	0.008	1
LINC00707	0.0185848	0.0848516	0.071	0.008	1
SCART1	0.0185848	0.0848516	0.071	0.008	1
PSTPIP1	0.0185848	0.0848516	0.071	0.008	1
P2RX6	0.0185848	0.0812039	0.071	0.008	1
Z97192.1	0.0185848	0.0848516	0.071	0.008	1
IL13RA2	0.0185848	0.0848516	0.071	0.008	1
ACADVL	0.0186395	-0.506943	0.714	0.875	1
ASCC2	0.0188106	0.349952	0.5	0.235	1
SLC4A8	0.0188314	0.237816	0.357	0.13	1
RCAN1	0.0189069	0.309353	0.643	0.33	1
RARG	0.0190236	0.239902	0.429	0.171	1
C1QTNF2	0.0190846	0.218707	0.286	0.092	1
ADAMTSL4-AS1	0.0190847	0.212044	0.286	0.092	1
SNHG5	0.0191879	-0.44487	1	0.987	1
DERA	0.019628	0.401334	0.929	0.647	1
CDK5	0.019743	0.395922	0.786	0.483	1
LINC02055	0.0198976	0.239902	0.286	0.092	1
PPP1R10	0.0201285	0.45708	0.643	0.376	1
PTPRF	0.0203492	-0.537367	0.071	0.373	1
POP7	0.0204966	0.496849	0.857	0.675	1
KIAA1549	0.0206414	0.241026	0.357	0.133	1
MYBL2	0.0208365	0.378865	0.429	0.192	1
HINT3	0.0208391	0.253936	0.357	0.136	1
C12orf4	0.02103	0.311817	0.357	0.141	1
DGAT1	0.0210927	0.383518	0.429	0.187	1
CDC42BPA	0.0210934	0.374532	0.857	0.532	1
C9orf72	0.0211402	0.225402	0.286	0.095	1
ERRFI1	0.0211403	0.218707	0.286	0.095	1
IL6ST	0.0211997	-0.697132	0.571	0.734	1
POLM	0.02121	-0.433369	0	0.281	1
TFAP4	0.0212113	0.273155	0.214	0.061	1
FAM189B	0.0213678	0.362235	0.429	0.192	1
GCA	0.021514	0.304204	0.429	0.182	1
MCM3	0.0215185	0.426949	0.643	0.34	1
PAGE5	0.0215321	-0.424823	0.929	0.969	1
TMEM14C	0.0216462	0.366265	1	0.995	1
PIGB	0.0216589	0.222051	0.286	0.095	1
SIX1	0.0216589	0.215372	0.286	0.095	1
ZNF525	0.0217436	0.236497	0.143	0.031	1
IFT20	0.021775	-0.548594	0.357	0.632	1
CREB3	0.0219499	-0.556811	0.5	0.726	1
ASH2L	0.0220397	0.297317	0.5	0.23	1
KCTD13	0.0220417	0.308614	0.357	0.141	1
IGFBP3	0.0222777	-1.14324	0.071	0.386	1
USP5	0.0223244	0.361448	0.5	0.23	1
PSD3	0.0226374	0.351974	0.786	0.527	1
APOBEC3C	0.0226632	0.315026	0.357	0.143	1
STIM2	0.022784	0.250543	0.5	0.22	1
EIF5	0.0228446	0.471244	1	0.972	1
PDLIM3	0.023186	0.322543	0.714	0.391	1
RNF168	0.0232105	0.336064	0.571	0.292	1
AMDHD2	0.0232149	0.286726	0.286	0.1	1
OXNAD1	0.0233671	0.308614	0.357	0.143	1
GLB1	0.0234031	-0.402996	0	0.274	1
PBK	0.0236499	0.498928	0.643	0.358	1
SNX21	0.0237612	0.234614	0.357	0.136	1
FAM8A1	0.0238349	0.208723	0.286	0.095	1
ZNF599	0.0238659	0.225402	0.286	0.097	1
MPC1	0.0240008	0.293235	0.643	0.332	1
TMEM203	0.024018	0.355209	0.786	0.481	1
LMF2	0.0240921	0.324029	0.786	0.453	1
TRNP1	0.0242743	-0.510509	0	0.274	1
ABRAXAS1	0.0243929	0.308905	0.5	0.235	1
AC015982.2	0.0243951	0.149034	0.143	0.031	1
AC002480.1	0.0243951	0.149034	0.143	0.031	1
AC005076.1	0.0243951	0.149034	0.143	0.031	1
AC131568.1	0.0243951	0.149034	0.143	0.031	1
PPP3CB-AS1	0.0243951	0.149034	0.143	0.031	1
ZKSCAN2	0.0243951	0.149034	0.143	0.031	1
ADAMTS10	0.0243951	0.149034	0.143	0.031	1
KIAA1755	0.0243951	0.149034	0.143	0.031	1
CAMTA2	0.0244177	-0.544468	0.071	0.363	1
AUNIP	0.0244373	0.222051	0.286	0.097	1
LENG8	0.0244844	0.315026	0.357	0.146	1
ZNF283	0.0245694	0.194165	0.214	0.061	1
ZNF431	0.0245754	0.244242	0.357	0.138	1
ZNF407	0.0245837	0.442213	0.571	0.317	1
LINC01376	0.0248702	0.145458	0.143	0.031	1
AC106744.2	0.0248702	0.145458	0.143	0.031	1
AL450384.2	0.0248702	0.145458	0.143	0.031	1
TIAM1	0.0248702	0.145458	0.143	0.031	1
AC046143.1	0.0250194	0.218707	0.286	0.097	1
GMNN	0.0250272	0.532566	0.714	0.448	1
AC092903.2	0.0251008	0.190693	0.214	0.061	1
LMLN	0.0251008	0.190693	0.214	0.061	1
AC093323.1	0.0251008	0.187229	0.214	0.061	1
ZNF790	0.0251008	0.183774	0.214	0.061	1
HUWE1	0.0251207	0.320084	0.929	0.57	1
RAD51-AS1	0.0251293	0.273155	0.214	0.064	1
SSX1	0.0251455	0.359937	0.286	0.1	1
GTPBP2	0.0251638	0.280108	0.357	0.141	1
TMEM254	0.0252148	0.237816	0.357	0.138	1
ZC3H14	0.025285	0.415792	0.714	0.45	1
ZNF709	0.0253523	0.141892	0.143	0.031	1
PYURF	0.0253778	-0.467341	0.643	0.831	1
MICOS13	0.0254028	-0.38858	1	0.98	1
FBXL13	0.025513	0.246015	0.429	0.182	1
AC018464.1	0.0255906	0.29512	0.429	0.187	1
ABHD4	0.025641	0.187229	0.214	0.061	1
BTN3A1	0.025641	0.183774	0.214	0.061	1
ANKRD42	0.025641	0.183774	0.214	0.061	1
PLEKHM2	0.0257565	-0.436644	0.071	0.361	1
TOR1AIP1	0.0259195	0.365377	0.571	0.315	1
ORC1	0.0262025	0.266236	0.214	0.064	1
E4F1	0.0263402	0.290046	0.286	0.102	1
GPX8	0.0263533	0.330553	1	0.893	1
DNAH11	0.0264057	0.305419	0.357	0.146	1
CCDC88A	0.0264141	0.427294	0.857	0.581	1
H2AFJ	0.0264813	-0.595938	0.929	0.923	1
ZSWIM6	0.0265055	0.3337	0.786	0.476	1
PTPN18	0.026531	0.218707	0.429	0.176	1
MSH3	0.0265375	0.233207	0.714	0.353	1
CARD18	0.026573	0.367571	0.786	0.465	1
IDH3A	0.0265768	0.392974	0.571	0.34	1
PDAP1	0.0265865	0.333784	1	0.939	1
HOXA9	0.0265948	0.49333	0.429	0.22	1
MOSPD3	0.0266062	-0.446786	0.071	0.358	1
FAM162B	0.0266893	0.335221	0.714	0.44	1
SFXN1	0.0267722	0.371632	0.714	0.409	1
SIGIRR	0.0269385	-0.460438	0	0.266	1
NUDT1	0.0270251	0.485414	1	0.788	1
SPDL1	0.0271927	0.38936	0.643	0.363	1
HEXIM2	0.0272012	0.299049	0.357	0.146	1
RNF149	0.0273106	-0.3946	0	0.263	1
TAF1A	0.0274226	0.222051	0.286	0.1	1
RIPK2	0.0279618	0.40881	0.571	0.325	1
SCML1	0.0279886	0.309148	0.571	0.286	1
XYLB	0.0280604	0.218707	0.286	0.1	1
RNF115	0.0280691	0.389296	0.786	0.532	1
MAP3K14	0.0283028	0.277124	0.429	0.189	1
ANKRD27	0.0286125	0.212394	0.357	0.138	1
PRCC	0.028762	0.319854	0.571	0.299	1
CCNE2	0.028908	0.261412	0.357	0.141	1
BST1	0.0290059	0.360726	0.286	0.11	1
ZNF148	0.0290868	0.30617	0.857	0.54	1
ZNF85	0.0291362	0.302231	0.357	0.148	1
STK39	0.0291703	0.560088	0.714	0.458	1
TELO2	0.0292598	0.23078	0.429	0.182	1
NLK	0.0293449	0.362718	0.571	0.299	1
WDR62	0.0293706	0.212044	0.286	0.1	1
HM13	0.0294331	0.366927	0.929	0.893	1
BCL2L12	0.0294415	0.355209	0.714	0.414	1
ATAD5	0.0295298	0.274146	0.429	0.187	1
MAP3K2-DT	0.0295637	0.357414	0.286	0.105	1
NLRX1	0.0297424	0.190693	0.214	0.064	1
C9orf40	0.029853	0.402221	0.714	0.402	1
AC008267.5	0.0300432	0.208723	0.286	0.1	1
NSMF	0.0300435	0.205411	0.286	0.1	1
IARS	0.0301617	0.388632	0.786	0.509	1
PRPS1	0.0302338	0.330641	0.571	0.281	1
C6orf89	0.0302732	0.38371	0.714	0.506	1
TNFRSF14	0.0303586	0.187229	0.214	0.064	1
ISOC1	0.030459	0.29852	0.571	0.292	1
CSTF2T	0.0306168	0.222051	0.286	0.102	1
DUSP5	0.0306908	-0.416881	0	0.256	1
PLAGL1	0.030705	0.406273	0.571	0.338	1
CSRP2	0.0308955	0.732117	0.857	0.693	1
HINT1	0.0309494	0.191286	1	1	1
AC097534.2	0.0309845	0.183774	0.214	0.064	1
PRICKLE3	0.0309845	0.176887	0.214	0.064	1
PACC1	0.0310824	0.221716	0.429	0.184	1
IPP	0.0312611	0.236855	0.429	0.187	1
HMBS	0.031432	0.361341	0.643	0.343	1
SCML2	0.0316202	0.180326	0.214	0.064	1
OTULINL	0.0316667	0.218707	0.143	0.033	1
FBXW11	0.031831	0.424773	0.786	0.563	1
ARAP1	0.0319309	0.27681	0.286	0.105	1
SUMF1	0.0319352	0.371824	0.5	0.266	1
PIGV	0.0320203	0.215372	0.286	0.102	1
TMED8	0.0320203	0.212044	0.286	0.102	1
CNEP1R1	0.0320511	0.299049	0.357	0.151	1
SUB1	0.032076	0.259865	1	1	1
SRRT	0.0321192	0.332575	0.714	0.425	1
HSPE1	0.0321447	0.288017	1	0.995	1
EXOSC7	0.0323073	0.461926	1	0.729	1
HLTF	0.0324425	0.400546	0.857	0.614	1
UBE2Q2	0.0325784	0.385817	0.786	0.483	1
ATPAF2	0.0325814	-0.366255	0	0.251	1
LRMDA	0.0328099	0.280108	0.286	0.107	1
TMUB2	0.0329672	0.233814	0.429	0.187	1
NFKBIA	0.0332064	0.431307	0.857	0.637	1
MRPS9	0.0332689	0.300321	0.643	0.35	1
CHAF1A	0.0333708	0.405639	0.429	0.205	1
DGUOK-AS1	0.0333714	0.145458	0.143	0.033	1
SPEF2	0.0333714	0.145458	0.143	0.033	1
LINC02104	0.0333714	0.145458	0.143	0.033	1
NCR3LG1	0.0333714	0.145458	0.143	0.033	1
AC006299.1	0.0333714	0.145458	0.143	0.033	1
WDR90	0.0333714	0.145458	0.143	0.033	1
LINC01547	0.0333714	0.145458	0.143	0.033	1
SNTB2	0.0334703	-0.467274	0.286	0.545	1
S1PR3	0.033473	0.202105	0.286	0.102	1
SURF6	0.0334816	0.230203	0.5	0.233	1
PSMA3	0.0334915	0.362526	1	0.957	1
VRK2	0.0335023	0.413997	0.571	0.304	1
HIF1AN	0.0336055	-0.357642	0	0.248	1
VAMP2	0.0336825	-0.606459	0.5	0.685	1
AFF3	0.0336888	0.333784	0.429	0.189	1
MDFIC	0.0337557	0.397277	0.714	0.483	1
SLC30A7	0.0338127	0.277383	0.571	0.292	1
SEC23IP	0.0339477	-0.383329	0	0.248	1
DENND1B	0.0339733	0.138334	0.143	0.033	1
TRIM69	0.0339733	0.141892	0.143	0.033	1
NANOS3	0.0339733	0.138334	0.143	0.033	1
ZNF549	0.0339733	0.141892	0.143	0.033	1
TUSC3	0.0341914	0.435494	1	0.898	1
NID1	0.034234	0.352129	0.571	0.307	1
CBR1	0.0342906	-0.451831	0.929	0.923	1
RGS3	0.0343586	-0.518258	0.286	0.563	1
OGFOD2	0.0344712	0.22823	0.357	0.146	1
CHEK1	0.0344991	0.442482	0.571	0.343	1
SACM1L	0.0345069	0.422387	0.5	0.274	1
SPIRE1	0.0345459	0.261641	0.714	0.417	1
DDX11-AS1	0.0345832	0.138334	0.143	0.033	1
ZNF674-AS1	0.0345833	0.12419	0.143	0.033	1
LARP4B	0.0347622	-0.449311	0.071	0.34	1
ELOC	0.0347869	0.300951	1	0.987	1
ZNF586	0.034976	0.198808	0.286	0.102	1
WDTC1	0.0353078	0.22823	0.357	0.146	1
ELL	0.0354075	0.283248	0.357	0.151	1
RPA2	0.0354763	0.272288	0.571	0.299	1
NSD2	0.0355193	0.336763	0.786	0.488	1
PPP1R2	0.0355195	0.364248	0.786	0.532	1
TAF5	0.0355431	0.187229	0.214	0.066	1
ZNF689	0.0355431	0.187229	0.214	0.066	1
CKAP2	0.0356356	0.691665	0.643	0.427	1
TRIM22	0.0357467	0.195518	0.286	0.102	1
TRPC3	0.0358276	0.131245	0.143	0.033	1
PSRC1	0.0359416	0.330052	0.429	0.192	1
OSGIN2	0.0361605	0.221875	0.357	0.146	1
OTOS	0.0362494	0.183774	0.214	0.066	1
TCF21	0.0362494	0.183774	0.214	0.066	1
AC092718.4	0.0362494	0.183774	0.214	0.066	1
INO80B	0.0363266	0.212044	0.286	0.105	1
PAX8-AS1	0.0363491	-0.426431	0.071	0.338	1
HBP1	0.036375	0.280108	0.429	0.197	1
RBIS	0.0363811	0.391139	1	0.834	1
TPM2	0.0365433	-0.291262	1	1	1
PDCL	0.036625	0.297095	0.643	0.355	1
YTHDF2	0.0367524	0.322543	0.857	0.604	1
RAD9A	0.036892	0.212394	0.357	0.143	1
H3F3B	0.0369682	0.311714	1	1	1
ZNF133	0.0371169	0.231418	0.357	0.148	1
PAPOLG	0.0371209	0.208723	0.286	0.105	1
PHF6	0.0371502	0.314109	0.714	0.419	1
ZNF302	0.0375923	0.414479	0.357	0.164	1
EEF2	0.0376605	0.254693	1	0.995	1
FKBP2	0.0376632	-0.416144	0.071	0.335	1
NUDT9	0.0377516	0.300321	0.643	0.373	1
VPS45	0.0378159	0.318803	0.5	0.261	1
TTBK2	0.0378963	0.224731	0.429	0.192	1
WDR76	0.0379531	0.330052	0.429	0.197	1
CDC37	0.0379617	0.355029	1	0.877	1
ECM1	0.0382781	-0.502491	0.429	0.68	1
WDR70	0.0382972	0.448466	0.643	0.399	1
CDH24	0.0387495	0.198808	0.286	0.105	1
CYB5R3	0.0391063	-0.474124	0.786	0.926	1
RAB12	0.0391089	0.273849	0.357	0.153	1
CCSER2	0.0391681	0.322543	0.714	0.437	1
ILF2	0.0395453	0.292708	1	0.9	1
NDC80	0.0396571	0.287364	0.5	0.23	1
SLC39A6	0.0396914	0.401571	0.643	0.394	1
SMC2	0.0397161	0.584963	0.714	0.478	1
SNAPC4	0.0398282	0.215547	0.357	0.148	1
SNTA1	0.0398841	0.221716	0.429	0.192	1
NBPF14	0.0399999	-0.34026	0	0.235	1
ANKRD10	0.0399999	0.332364	0.429	0.212	1
AC010624.5	0.0400516	0.177961	0.071	0.01	1
KCTD8	0.0400531	0.492603	0.071	0.01	1
AC022210.2	0.0401542	0.222248	0.143	0.036	1
ZNF146	0.0402145	-0.354759	0	0.235	1
TSHZ3	0.0404096	-0.39179	0	0.235	1
CDKN1A	0.0404445	0.316683	0.714	0.432	1
NMI	0.0406994	0.347364	0.357	0.166	1
CLSTN1	0.040708	0.38488	0.786	0.575	1
EMG1	0.040904	0.369267	0.857	0.588	1
EFNA5	0.0409533	0.420341	0.357	0.176	1
NSUN3	0.0410037	0.292708	0.357	0.159	1
HP1BP3	0.041095	0.438194	1	0.836	1
SBNO1	0.0411271	0.305892	0.714	0.402	1
TM2D2	0.0413298	0.285203	1	0.621	1
ABCE1	0.0413992	0.409827	0.857	0.68	1
EIF3F	0.0415441	0.29084	1	0.972	1
ZNF480	0.0416261	-0.348977	0	0.233	1
ISG20L2	0.0416981	0.264511	0.357	0.153	1
TEX9	0.0417859	0.331182	0.286	0.115	1
SAYSD1	0.0417866	0.341261	0.429	0.217	1
MAGEH1	0.0418435	-0.413561	0.071	0.327	1
TWISTNB	0.0418708	0.327936	0.714	0.389	1
DEXI	0.0421421	-0.417917	0.143	0.407	1
SKA3	0.0421606	0.294435	0.429	0.202	1
CTSK	0.0422908	0.259349	0.214	0.072	1
CRIP1	0.0422935	0.0967168	0.214	0.066	1
TRIML2	0.0422959	0.510248	0.286	0.11	1
TRIM7	0.0423062	0.27681	0.286	0.113	1
FAM131C	0.0424641	0.0848516	0.071	0.01	1
FAM229A	0.0424641	0.0848516	0.071	0.01	1
AC093575.1	0.0424641	0.0848516	0.071	0.01	1
AC118553.1	0.0424641	0.0848516	0.071	0.01	1
HIST2H2BE	0.0424641	0.0848516	0.071	0.01	1
SLC9C2	0.0424641	0.0848516	0.071	0.01	1
AL136987.1	0.0424641	0.0848516	0.071	0.01	1
CACNB4	0.0424641	0.0848516	0.071	0.01	1
AC006058.3	0.0424641	0.0848516	0.071	0.01	1
ZKSCAN7	0.0424641	0.0848516	0.071	0.01	1
ZMYND10	0.0424641	0.0848516	0.071	0.01	1
ARHGAP31-AS1	0.0424641	0.0848516	0.071	0.01	1
AC116424.1	0.0424641	0.0848516	0.071	0.01	1
AC091978.1	0.0424641	0.0848516	0.071	0.01	1
AC099522.2	0.0424641	0.0848516	0.071	0.01	1
HAVCR2	0.0424641	0.0848516	0.071	0.01	1
AC026689.1	0.0424641	0.0848516	0.071	0.01	1
AC145098.1	0.0424641	0.0848516	0.071	0.01	1
DOK3	0.0424641	0.0848516	0.071	0.01	1
ZNF879	0.0424641	0.0848516	0.071	0.01	1
LTB	0.0424641	0.0848516	0.071	0.01	1
HLA-DOB	0.0424641	0.0848516	0.071	0.01	1
ST7-AS2	0.0424641	0.0848516	0.071	0.01	1
OPN1SW	0.0424641	0.0848516	0.071	0.01	1
NPM2	0.0424641	0.0848516	0.071	0.01	1
TNFRSF10A	0.0424641	0.0848516	0.071	0.01	1
C10orf67	0.0424641	0.0848516	0.071	0.01	1
STOX1	0.0424641	0.0848516	0.071	0.01	1
AC067750.1	0.0424641	0.0848516	0.071	0.01	1
AL139339.1	0.0424641	0.0848516	0.071	0.01	1
ADD3-AS1	0.0424641	0.0848516	0.071	0.01	1
CSTF3-DT	0.0424641	0.0848516	0.071	0.01	1
C11orf65	0.0424641	0.0848516	0.071	0.01	1
AGAP2	0.0424641	0.0848516	0.071	0.01	1
AC010201.3	0.0424641	0.0848516	0.071	0.01	1
AC069234.1	0.0424641	0.0848516	0.071	0.01	1
CCDC62	0.0424641	0.0848516	0.071	0.01	1
AC244502.1	0.0424641	0.0848516	0.071	0.01	1
AC004825.2	0.0424641	0.0848516	0.071	0.01	1
TGFB3	0.0424641	0.0848516	0.071	0.01	1
AC103740.1	0.0424641	0.0848516	0.071	0.01	1
SLC16A13	0.0424641	0.0848516	0.071	0.01	1
EPN2-AS1	0.0424641	0.0848516	0.071	0.01	1
SPAG5-AS1	0.0424641	0.0848516	0.071	0.01	1
AC104984.2	0.0424641	0.0848516	0.071	0.01	1
AC015802.6	0.0424641	0.0848516	0.071	0.01	1
LINC01443	0.0424641	0.0848516	0.071	0.01	1
AC016588.2	0.0424641	0.0848516	0.071	0.01	1
AC005786.3	0.0424641	0.0848516	0.071	0.01	1
ZNF296	0.0424641	0.0848516	0.071	0.01	1
VSIG10L	0.0424641	0.0848516	0.071	0.01	1
SLC4A11	0.0424641	0.0848516	0.071	0.01	1
OVOL2	0.0424641	0.0848516	0.071	0.01	1
AL023803.3	0.0424641	0.0848516	0.071	0.01	1
LINC00310	0.0424641	0.0848516	0.071	0.01	1
PWP2	0.0424641	0.0848516	0.071	0.01	1
Z95115.1	0.0424641	0.0848516	0.071	0.01	1
XG	0.0424641	0.0848516	0.071	0.01	1
AC115618.1	0.0424641	0.0848516	0.071	0.01	1
CCDC120	0.0424641	0.0848516	0.071	0.01	1
GPRASP1	0.0424641	0.0848516	0.071	0.01	1
EIF1AX	0.0425465	0.369893	1	0.957	1
LINC00467	0.0427438	0.221875	0.357	0.151	1
AC007099.1	0.0430893	0.0775653	0.071	0.01	1
AC098820.1	0.0430893	0.0812039	0.071	0.01	1
AC093791.1	0.0430893	0.0812039	0.071	0.01	1
CTSV	0.0430893	0.0703155	0.071	0.01	1
NOXA1	0.0430893	0.0812039	0.071	0.01	1
SAA4	0.0430893	0.0812039	0.071	0.01	1
MIR4713HG	0.0430893	0.0812039	0.071	0.01	1
EIF2AK4	0.0431558	0.342873	0.929	0.77	1
AC010327.4	0.0432318	-0.366255	0	0.23	1
NEDD4	0.0434342	-0.299868	0.214	0.512	1
SH3BP4	0.043516	-0.465457	0.143	0.402	1
LSM14A	0.0435398	-0.501072	0.357	0.568	1
SEMA3D	0.0435975	0.176887	0.214	0.069	1
PHF8	0.0435975	0.176887	0.214	0.069	1
CEBPB	0.0436861	-0.572456	0.786	0.813	1
C10orf55	0.043721	0.0775653	0.071	0.01	1
TMEM144	0.0439609	0.141892	0.143	0.036	1
PTPRQ	0.0439609	0.141892	0.143	0.036	1
MYCBP2-AS1	0.0439609	0.141892	0.143	0.036	1
LCAT	0.0439609	0.141892	0.143	0.036	1
PLEKHF2	0.04415	0.212044	0.286	0.11	1
HYMAI	0.044151	0.249081	0.214	0.072	1
SMC4	0.0441539	0.657871	0.786	0.575	1
CEP128	0.0441828	0.518268	0.429	0.225	1
ARL3	0.0443072	0.340081	1	0.926	1
MYADM	0.0443555	-0.547164	0.357	0.604	1
SNHG31	0.0444216	0.163212	0.214	0.069	1
C14orf132	0.0446336	-0.351871	0	0.228	1
ZSCAN16	0.0446985	0.138334	0.143	0.036	1
CDHR3	0.0446985	0.138334	0.143	0.036	1
SND1-IT1	0.0446985	0.138334	0.143	0.036	1
ADIRF-AS1	0.0446985	0.138334	0.143	0.036	1
AL118558.3	0.0446985	0.138334	0.143	0.036	1
C19orf44	0.0446985	0.134785	0.143	0.036	1
C19orf54	0.0446985	0.134785	0.143	0.036	1
DACT3	0.0446985	0.138334	0.143	0.036	1
BRIP1	0.0448024	0.569205	0.571	0.332	1
FAM162A	0.0452378	-0.510221	0.643	0.744	1
BRCA1	0.0453772	0.479168	0.5	0.256	1
GLI1	0.0454451	0.134785	0.143	0.036	1
CACNB1	0.0454451	0.134785	0.143	0.036	1
SLC30A5	0.0455012	0.346763	0.571	0.343	1
MED16	0.0455338	0.210533	0.571	0.289	1
SF3A2	0.0460072	0.433506	0.5	0.274	1
ST3GAL4	0.0461307	-0.351871	0	0.225	1
AC015912.3	0.0462009	0.127713	0.143	0.036	1
XPR1	0.0464318	0.291058	0.5	0.263	1
TCF7L2	0.0464404	-0.446629	0.143	0.396	1
MYBL1	0.0466611	0.311817	0.429	0.215	1
HDAC4	0.0468215	0.215547	0.357	0.153	1
TMEM69	0.0468216	0.212394	0.357	0.153	1
CREB3L1	0.0468498	0.293374	0.929	0.67	1
HULC	0.0469659	0.12419	0.143	0.036	1
MIR222HG	0.0469876	0.275099	0.571	0.312	1
MCM5	0.0470378	0.243974	0.571	0.294	1
DYNLL2	0.0470855	0.317658	0.429	0.217	1
GABARAP	0.0473127	-0.366681	1	0.997	1
SKI	0.0474187	0.265922	0.5	0.258	1
NGLY1	0.0474343	0.413899	0.571	0.335	1
EEA1	0.0475141	0.336633	0.929	0.688	1
RPL36A	0.0475704	-0.241292	1	1	1
SCRN3	0.0476135	-0.328554	0	0.223	1
GRB10	0.0476654	-0.328554	0	0.223	1
SRSF2	0.0476999	0.316555	1	0.854	1
UVRAG	0.0478045	-0.444258	0.143	0.396	1
ANAPC4	0.0478837	0.215547	0.357	0.153	1
ZNF764	0.0480803	0.337352	0.214	0.074	1
DIRC3	0.0482357	-0.436099	0	0.223	1
RPIA	0.0482644	0.296565	0.5	0.269	1
FBXO5	0.0486092	0.549058	0.5	0.284	1
DLEU1	0.0487545	-0.37375	0.071	0.345	1
MIER3	0.048952	0.255918	0.214	0.074	1
CCDC144NL-AS1	0.048994	0.493815	0.286	0.12	1
ZNF90	0.0490727	0.180326	0.214	0.072	1
GUCD1	0.0492285	0.264511	0.357	0.159	1
HMGCL	0.0492557	-0.33149	0	0.22	1
MRPS18A	0.0492968	0.292221	0.643	0.396	1
AGGF1	0.0493669	0.411352	0.571	0.381	1
TERT	0.0493771	0.208723	0.286	0.113	1
USP46	0.0495399	-0.384837	0.071	0.317	1
MED6	0.0498609	-0.355529	0.071	0.317	1
MSH5	0.0499097	0.192235	0.286	0.11	1
APOLD1	0.0499368	0.425736	0.357	0.171	1
SPATC1L	0.0499372	-0.352835	0.071	0.317	1
EEF1E1	0.0499672	0.285036	1	0.803	1
THAP7-AS1	0.0499728	0.176887	0.214	0.072	1
ATP11C	0.0501777	0.336064	0.5	0.284	1
ENOSF1	0.0502026	0.260435	0.286	0.115	1
EXOSC6	0.0502659	-0.403182	0.071	0.315	1
VPS53	0.0503885	-0.403182	0.071	0.315	1
PTGES3	0.0506048	0.328051	1	0.997	1
XPO5	0.0506494	-0.307838	0	0.217	1
PLSCR1	0.0506938	-0.405783	0.071	0.315	1
C1RL	0.0508317	-0.319713	0	0.217	1
CCDC71	0.050885	0.173456	0.214	0.072	1
ABHD6	0.050885	0.173456	0.214	0.072	1
PIP4K2A	0.0508868	-0.379552	0.071	0.315	1
FRY	0.0509789	0.441902	0.429	0.23	1
CTPS2	0.0510074	0.346763	0.571	0.292	1
ABHD11	0.0511046	0.349713	0.5	0.294	1
CHTOP	0.0512266	-0.428183	0.286	0.547	1
NT5E	0.0513111	0.308718	1	0.985	1
MBD4	0.0513282	0.432322	0.714	0.488	1
MEF2A	0.0513717	0.28797	0.786	0.519	1
ARHGAP26	0.051388	0.186019	0.429	0.197	1
VPS11	0.0514031	0.202105	0.286	0.113	1
PXMP4	0.0514083	0.341119	0.357	0.174	1
SNRPD1	0.0514715	0.266236	1	0.974	1
ECI2	0.0517219	0.421742	0.929	0.895	1
ATP5F1A	0.0517781	0.426918	0.929	0.913	1
ZNF670	0.0518095	0.170034	0.214	0.072	1
ZNF529-AS1	0.0518095	0.170034	0.214	0.072	1
LNCOG	0.0518096	0.166619	0.214	0.072	1
ERGIC3	0.0519404	-0.495756	0.429	0.627	1
P4HB	0.0521416	-0.384036	1	0.974	1
TTLL5	0.0523186	0.196729	0.357	0.153	1
CHMP5	0.0523397	-0.367232	0.857	0.934	1
FTX	0.0523489	-0.553882	0.286	0.586	1
PLCB1	0.0523817	-0.39658	0.071	0.345	1
DCAF17	0.0524391	0.195518	0.286	0.113	1
DMD	0.0525985	0.0564359	0.5	0.235	1
RRP15	0.0526133	0.277869	0.714	0.458	1
BTBD2	0.0526856	-0.325613	0	0.215	1
SDSL	0.0528098	0.209719	0.429	0.202	1
RO60	0.0528213	0.324698	0.714	0.458	1
RSL24D1	0.0528239	0.407065	0.857	0.76	1
MAPK14	0.0528547	-0.379552	0.071	0.312	1
KIAA1549L	0.0530551	0.331182	0.5	0.271	1
DHRS4L2	0.0531042	-0.417206	0.214	0.458	1
CAPNS1	0.053197	-0.363896	0.714	0.849	1
QPCT	0.0532009	-0.535132	0.214	0.445	1
USP9X	0.0532996	0.470091	0.714	0.568	1
PITPNA-AS1	0.0533622	0.250218	0.714	0.414	1
TAF9B	0.0534714	0.199848	0.357	0.153	1
ANKRA2	0.0534903	0.195518	0.286	0.113	1
ZNF93	0.0534905	0.18896	0.286	0.113	1
ITCH	0.0536605	0.30117	0.786	0.55	1
DNMT1	0.0536753	0.387653	0.857	0.629	1
SPPL3	0.0536841	0.162439	0.571	0.281	1
PRKAA1	0.0537049	0.303824	0.571	0.315	1
WRNIP1	0.0537292	0.353208	0.429	0.22	1
MRPS11	0.0537697	0.337855	0.786	0.668	1
MIB1	0.0537748	0.379644	0.714	0.412	1
ARID1A	0.0539294	0.24689	0.786	0.455	1
CDCA7L	0.0539883	0.254673	0.5	0.258	1
NUDT8	0.0542419	0.267617	0.357	0.164	1
SERF2	0.0543756	-0.259603	1	1	1
SEC22C	0.0546242	-0.396002	0.143	0.389	1
MIR100HG	0.0547004	0.244438	1	0.944	1
DDX46	0.0547639	0.362353	1	0.765	1
FBXL20	0.0548262	-0.366255	0	0.212	1
UBAP2	0.054935	0.254777	0.714	0.432	1
RASA1	0.0549413	0.432111	0.643	0.404	1
AC113414.1	0.0550291	-0.386155	0	0.212	1
VDAC2	0.0550315	0.26735	1	0.98	1
CDCA4	0.0551064	0.176063	0.643	0.33	1
GATC	0.0553876	0.19782	0.429	0.202	1
AP3B1	0.055416	0.406334	0.786	0.639	1
PLEKHO1	0.0556023	0.388632	0.929	0.609	1
HIST1H3G	0.0556328	0.149666	0.214	0.072	1
SH3RF1	0.0556617	0.374952	0.929	0.598	1
PCIF1	0.0557189	0.212394	0.357	0.159	1
WDR55	0.0557191	0.209247	0.357	0.159	1
RAB4A	0.0557586	0.250218	0.714	0.435	1
SMARCA2	0.0557697	0.199706	0.571	0.294	1
SETD5	0.0557917	0.437584	0.786	0.547	1
ARHGAP19	0.05581	0.193616	0.357	0.156	1
NFKBIE	0.0558102	0.19051	0.357	0.156	1
FGGY	0.0558671	0.255233	0.357	0.164	1
SRP54	0.0559161	0.260822	0.929	0.701	1
ORMDL3	0.0560623	0.198808	0.286	0.115	1
AC108463.3	0.0561328	0.138334	0.143	0.038	1
BBS5	0.0561328	0.138334	0.143	0.038	1
AGBL3	0.0561328	0.138334	0.143	0.038	1
KIFC2	0.0561328	0.138334	0.143	0.038	1
AC068279.2	0.0563229	-0.316753	0	0.21	1
GYS1	0.0563788	-0.325613	0	0.21	1
MTHFD1L	0.0568076	-0.461412	0.429	0.652	1
LINC00339	0.0568128	0.176887	0.214	0.074	1
EXOSC9	0.0569143	0.631691	0.643	0.491	1
SEMA3E	0.0570123	0.134785	0.143	0.038	1
PAG1	0.0570123	0.134785	0.143	0.038	1
RPH3AL	0.0570123	0.134785	0.143	0.038	1
AC004585.1	0.0570123	0.134785	0.143	0.038	1
ARID3B	0.0571532	0.249081	0.214	0.077	1
ZMYM3	0.0571683	0.198808	0.286	0.115	1
MAGOH	0.0573593	0.341669	0.929	0.79	1
UBAP2L	0.0575824	0.366265	0.714	0.514	1
ARL13B	0.0576136	0.540117	0.5	0.332	1
HIBCH	0.0576268	0.286191	0.786	0.517	1
TFG	0.0578822	0.309855	0.857	0.79	1
AC009264.1	0.0579017	0.117169	0.143	0.038	1
UPK3BL1	0.057967	0.290261	0.786	0.535	1
NUF2	0.0580648	0.641782	0.5	0.292	1
ZDHHC3	0.0581193	0.408985	0.643	0.442	1
TMEM182	0.0581427	0.245674	0.214	0.077	1
ADAM33	0.0581427	0.245674	0.214	0.077	1
HIVEP1	0.0582247	-0.322666	0	0.207	1
ABCA5	0.0582797	-0.328554	0	0.207	1
SLC25A40	0.0582905	0.18896	0.286	0.115	1
SARS2	0.0582905	0.192235	0.286	0.115	1
NT5C3B	0.0583838	0.432273	0.857	0.706	1
XRN1	0.0584149	0.454421	0.714	0.483	1
NHSL1	0.0585861	0.286394	0.286	0.118	1
HPRT1	0.0586501	0.374213	0.857	0.693	1
TXNDC15	0.0587186	0.4212	0.786	0.645	1
LUCAT1	0.058801	0.120675	0.143	0.038	1
CHCHD5	0.0591316	-0.444258	0.643	0.811	1
OGFOD1	0.0591478	-0.352835	0.071	0.304	1
ANKHD1	0.0591517	0.392524	0.643	0.402	1
TMEM59	0.0593239	0.412125	1	0.957	1
MRM3	0.0594216	0.199848	0.357	0.159	1
LASP1	0.0594899	0.2822	0.714	0.483	1
USP15	0.0595284	0.415071	0.714	0.593	1
HMGB3	0.0595485	0.301833	0.714	0.448	1
FAM83D	0.0595517	0.153752	0.357	0.153	1
DCUN1D1	0.0596178	0.338784	0.5	0.299	1
CDK11A	0.059643	0.384717	0.429	0.215	1
LINC00106	0.0597097	0.12419	0.143	0.038	1
UPF3B	0.0597216	0.382206	0.571	0.353	1
ATG4B	0.0597266	0.190363	0.5	0.251	1
MTMR11	0.0598595	0.166619	0.214	0.074	1
NAPG	0.0600714	0.273403	0.714	0.453	1
WDR5	0.0601807	-0.310816	0	0.205	1
CMTM7	0.0602367	-0.319713	0	0.205	1
PHKB	0.0602747	0.280108	0.786	0.476	1
RREB1	0.060288	-0.319713	0	0.205	1
A1BG-AS1	0.0604753	-0.33149	0	0.205	1
LINC01619	0.0604946	0.235503	0.214	0.077	1
FTSJ3	0.0605156	0.280108	0.5	0.274	1
SLC66A1	0.0605829	0.18896	0.286	0.115	1
POMT2	0.0605829	0.18896	0.286	0.115	1
C16orf91	0.0606948	-0.396002	0.143	0.381	1
SNAPC2	0.0607046	-0.425149	0.214	0.473	1
PDS5B	0.0607833	0.377405	0.5	0.309	1
APOE	0.0608078	-0.422398	0	0.205	1
SSNA1	0.0608635	-0.339288	0.786	0.91	1
DNAJC30	0.0610404	-0.363581	0.071	0.302	1
CDC45	0.0611988	0.357414	0.5	0.269	1
PFN2	0.0612024	0.383767	0.786	0.563	1
PSMC2	0.061395	-0.453718	0.571	0.688	1
RAB2B	0.0616705	0.414342	0.357	0.184	1
SPIN2B	0.0617542	0.182432	0.286	0.115	1
SUDS3	0.061837	0.354521	0.714	0.537	1
RPLP0	0.0618815	0.169569	1	1	1
WRN	0.0618851	-0.437121	0.143	0.376	1
ABHD14A	0.061971	0.216205	0.643	0.361	1
OPA1	0.0619772	0.287094	0.643	0.425	1
UBE2G1	0.0619851	0.294342	0.857	0.501	1
SNCG	0.0619895	0.193616	0.357	0.159	1
CASP4	0.0620277	-0.389272	0.214	0.506	1
C11orf1	0.0621168	0.198808	0.286	0.118	1
GTSE1	0.0622008	0.538967	0.5	0.284	1
CCNT2	0.0623029	-0.316753	0	0.202	1
KATNA1	0.062344	0.197012	0.571	0.297	1
BCAR1	0.0626125	0.349291	0.571	0.353	1
TBC1D15	0.0626379	0.268209	0.429	0.22	1
SMIM30	0.0630186	0.302686	0.643	0.427	1
RNF19A	0.063022	-0.468617	0.214	0.437	1
VPS29	0.0630753	0.271541	1	0.954	1
SF3B5	0.0630795	-0.356201	1	0.982	1
ENPP1	0.0631029	0.394279	0.571	0.358	1
PHETA1	0.0631128	0.218707	0.143	0.041	1
CNST	0.0631243	0.246293	0.5	0.269	1
TMEM97	0.0633108	0.195518	0.286	0.118	1
NME4	0.0633698	-0.410753	0.857	0.934	1
CENPI	0.063397	0.17508	0.357	0.156	1
MELK	0.0634365	0.356434	0.5	0.276	1
KIF13B	0.0635134	0.255233	0.357	0.169	1
ARL2	0.0637634	-0.421692	0.857	0.895	1
MTLN	0.0640277	-0.429668	0.714	0.859	1
EHF	0.064071	0.2906	0.143	0.041	1
TFAM	0.0640926	0.394793	0.643	0.481	1
SPAST	0.0640972	-0.292857	0	0.199	1
OSBPL11	0.0640979	-0.295866	0	0.199	1
PSMA2	0.0641748	0.260037	1	0.977	1
SLC27A4	0.0643198	0.261412	0.357	0.169	1
CDH11	0.0643534	0.336763	0.786	0.558	1
ALPK2	0.0643756	-0.310816	0	0.199	1
RNF126	0.0644513	0.271482	0.786	0.473	1
MIS18BP1	0.0646856	0.395734	0.643	0.486	1
MRPL15	0.0648034	-0.485994	0.643	0.726	1
CRTAP	0.0648212	0.278541	1	0.683	1
EMP1	0.0649162	-0.508515	0.571	0.721	1
RAB1B	0.0649412	0.283915	0.786	0.57	1
RBM6	0.0649465	0.364248	0.786	0.519	1
HIVEP2	0.0649587	0.391453	0.429	0.24	1
DBF4	0.0650202	0.438597	0.5	0.286	1
EFHD2	0.0651669	0.326751	0.786	0.698	1
PLK1	0.0652025	0.331682	0.429	0.207	1
FRMPD4	0.0653246	0.447253	0.571	0.361	1
DCTN3	0.0653333	0.273057	1	0.936	1
HDGFL3	0.0653695	0.401842	0.714	0.578	1
SAMD3	0.0655054	-0.775269	0.286	0.506	1
TMED5	0.0655129	-0.457485	0.429	0.583	1
GALNTL6	0.0655812	0.231418	0.286	0.12	1
KATNB1	0.065749	0.185692	0.286	0.118	1
HSD17B12	0.065901	0.354769	0.5	0.315	1
CFAP298	0.0661489	0.360726	0.857	0.703	1
ARHGEF26	0.0663121	0.170034	0.214	0.077	1
MBLAC2	0.0663121	0.170034	0.214	0.077	1
TMEM104	0.0663121	0.166619	0.214	0.077	1
ZMAT2	0.0666108	0.435805	0.714	0.54	1
PARP2	0.0666563	0.344238	0.429	0.228	1
TNFAIP2	0.0667193	0.186019	0.429	0.21	1
NIPSNAP2	0.0667453	0.37517	0.643	0.465	1
LGR4	0.0669934	0.182432	0.286	0.118	1
NAA80	0.0671459	0.250697	0.286	0.123	1
FAT4	0.0672202	0.238885	0.214	0.079	1
YAE1	0.0672518	0.256408	0.429	0.22	1
SDF2	0.0673761	-0.455892	0.643	0.726	1
ALYREF	0.0673936	0.366265	0.786	0.678	1
TBC1D31	0.0673972	0.322543	0.357	0.182	1
ZNF557	0.0674339	0.166619	0.214	0.077	1
TMEM147	0.0674371	0.206735	0.929	0.854	1
SYNCRIP	0.0674721	0.314055	0.857	0.688	1
ALAS1	0.0674854	-0.358218	0.071	0.294	1
NPW	0.0676956	0.294435	0.429	0.217	1
IFT43	0.0677059	-0.385213	0.286	0.596	1
DNER	0.0678283	0.350036	0.714	0.483	1
RRAS	0.0678338	-0.36113	0.929	0.995	1
PLRG1	0.0678717	0.34219	0.786	0.545	1
SPIDR	0.0679145	0.429653	0.643	0.465	1
ARIH1	0.0680246	0.239667	0.643	0.386	1
TMSB15A	0.0680867	0.388632	0.286	0.13	1
AHCY	0.0682489	0.218707	0.643	0.355	1
EHMT1	0.068327	0.365549	0.643	0.476	1
SLC25A51	0.068433	-0.292857	0	0.194	1
CD82	0.0685371	0.230203	0.429	0.217	1
AC005476.2	0.0685491	0.195518	0.286	0.12	1
LINC02062	0.0685694	0.159814	0.214	0.077	1
NKAPD1	0.0685882	0.254673	0.5	0.276	1
POLE2	0.0686651	0.283098	0.357	0.171	1
SLC35G2	0.0687496	0.336064	0.5	0.284	1
ENC1	0.0687605	-0.313788	0	0.194	1
STARD10	0.0688581	-0.325613	0	0.194	1
PAICS	0.0689017	0.42863	0.786	0.678	1
BBOX1-AS1	0.0689028	0.190693	0.143	0.041	1
RPL4	0.0690358	-0.251066	1	1	1
LMOD1	0.0690942	-0.400575	0.071	0.292	1
ATR	0.069131	0.384131	0.5	0.281	1
PGK1	0.0691728	-0.288654	0.929	0.974	1
COX20	0.0692485	-0.260762	0.786	0.941	1
SNRNP27	0.0694191	0.385817	0.643	0.504	1
HDGFL2	0.0694888	-0.436243	0.357	0.55	1
CERS5	0.0695504	-0.368924	0.071	0.292	1
SIVA1	0.0697414	0.263419	0.929	0.898	1
KTN1	0.0698263	0.23768	1	0.995	1
PITX2	0.0698293	0.134785	0.143	0.041	1
RASSF4	0.0698293	0.134785	0.143	0.041	1
CCDC89	0.0698293	0.134785	0.143	0.041	1
ZNF180	0.0698293	0.134785	0.143	0.041	1
PPFIA3	0.0698293	0.134785	0.143	0.041	1
SUV39H1	0.0698293	0.134785	0.143	0.041	1
RAB18	0.0700599	0.307491	0.857	0.642	1
GAS2L3	0.0704174	0.256408	0.357	0.169	1
TBC1D9	0.0705054	-0.271618	0	0.192	1
HIST2H2AB	0.0708545	0.131245	0.143	0.041	1
C3orf35	0.0708545	0.127713	0.143	0.041	1
ARF4-AS1	0.0708545	0.131245	0.143	0.041	1
STRIP2	0.0708545	0.131245	0.143	0.041	1
CLDND2	0.0708545	0.131245	0.143	0.041	1
CMTR1	0.0708686	-0.298868	0	0.192	1
AC093801.1	0.0708807	0.156423	0.214	0.077	1
ITGA6	0.0709126	0.185692	0.714	0.402	1
MCAT	0.0709694	-0.298868	0	0.192	1
DOCK6	0.0711348	0.185692	0.286	0.12	1
AC007566.1	0.0711556	0.174313	0.071	0.013	1
AC016821.1	0.0711556	0.174313	0.071	0.013	1
TPRKB	0.0712128	0.542002	0.714	0.573	1
TDP1	0.0712612	0.187411	0.357	0.164	1
CPQ	0.0712656	0.329184	0.571	0.35	1
MYO19	0.0713772	0.175639	0.571	0.299	1
UBQLN2	0.0717191	0.258319	0.357	0.174	1
DYNLT1	0.0717969	0.175171	1	1	1
VRK1	0.0718353	0.323405	0.5	0.279	1
CYP20A1	0.0718517	-0.383682	0.143	0.368	1
MIR3681HG	0.0718902	0.127713	0.143	0.041	1
ELMOD1	0.0718902	0.127713	0.143	0.041	1
AC016727.1	0.0718903	0.12419	0.143	0.041	1
ARHGAP6	0.0718903	0.12419	0.143	0.041	1
FAM9C	0.0719443	0.170034	0.143	0.041	1
TIFA	0.0720511	0.338547	0.429	0.238	1
SLC30A9	0.0720527	0.360155	0.643	0.43	1
FAM98A	0.0721173	-0.423399	0.429	0.637	1
TMED2	0.0722601	-0.419167	0.571	0.785	1
DEPDC1	0.0722687	0.337695	0.5	0.271	1
ARHGEF10	0.0723923	0.203111	0.571	0.315	1
RILPL2	0.0724632	-0.360902	0.071	0.289	1
PDE8A	0.0725518	0.307815	0.714	0.476	1
USPL1	0.0726871	0.212709	0.429	0.217	1
SFXN5	0.072701	0.27158	0.429	0.23	1
TPRG1L	0.0727215	0.184319	0.357	0.164	1
PIGC	0.0728284	0.206735	0.429	0.215	1
TXNRD3	0.0729363	0.12419	0.143	0.041	1
PSMC1	0.0729591	-0.425669	0.786	0.885	1
CLSPN	0.0729993	0.583119	0.571	0.402	1
RACGAP1	0.0732105	0.330641	0.429	0.24	1
GATD1	0.0732229	-0.331099	0.071	0.289	1
SEMA3C	0.0732704	-0.422547	0.5	0.806	1
CLASP1	0.0732879	0.195771	0.714	0.414	1
RIOX2	0.073519	-0.325613	0.071	0.289	1
MRPS2	0.0736229	-0.330186	0.143	0.427	1
SFT2D2	0.0737863	0.300205	0.429	0.238	1
EZHIP	0.0738085	0.163425	0.071	0.013	1
GPC6	0.0738147	0.352817	0.357	0.189	1
PRPF8	0.0739158	0.275031	0.929	0.629	1
GCNT1	0.074031	0.233091	0.429	0.217	1
CXCL2	0.0741541	0.141704	0.214	0.079	1
GFPT2	0.074166	0.308614	0.286	0.125	1
AC090825.1	0.0746578	0.238885	0.214	0.082	1
NSMCE1	0.0747383	-0.334951	0.357	0.624	1
SFMBT1	0.074773	0.244242	0.286	0.125	1
HNRNPA1P48	0.0751447	0.172695	0.286	0.12	1
NAA10	0.0751926	-0.416379	0.786	0.834	1
PPP1R15A	0.0752154	0.335521	0.643	0.414	1
TGFBR3L	0.0753064	0.378748	0.5	0.292	1
HNRNPA3	0.0753171	0.24196	1	0.967	1
ZNF197	0.0754578	0.166619	0.214	0.079	1
RPP14	0.0754578	0.166619	0.214	0.079	1
ZCCHC14	0.0754578	0.166619	0.214	0.079	1
SLC2A1	0.0755392	-0.289842	0	0.187	1
RBM15B	0.0755408	-0.292857	0	0.187	1
NQO2	0.0755742	0.331601	0.643	0.509	1
GBP4	0.0756095	0.0812039	0.071	0.013	1
RTCA-AS1	0.0756095	0.0812039	0.071	0.013	1
AL391832.2	0.0756095	0.0812039	0.071	0.013	1
PARTICL	0.0756095	0.0812039	0.071	0.013	1
ANKRD23	0.0756095	0.0812039	0.071	0.013	1
AC092683.1	0.0756095	0.0812039	0.071	0.013	1
TBC1D8	0.0756095	0.0812039	0.071	0.013	1
KLF7-IT1	0.0756095	0.0812039	0.071	0.013	1
AC009950.1	0.0756095	0.0812039	0.071	0.013	1
VIPR1	0.0756095	0.0812039	0.071	0.013	1
MYH15	0.0756095	0.0812039	0.071	0.013	1
TBILA	0.0756095	0.0812039	0.071	0.013	1
CFAP44-AS1	0.0756095	0.0812039	0.071	0.013	1
EPHB1	0.0756095	0.0812039	0.071	0.013	1
AADACL2-AS1	0.0756095	0.0812039	0.071	0.013	1
OPA1-AS1	0.0756095	0.0812039	0.071	0.013	1
LINC02509	0.0756095	0.0812039	0.071	0.013	1
LINC01846	0.0756095	0.0812039	0.071	0.013	1
MYLK4	0.0756095	0.0812039	0.071	0.013	1
AL713998.1	0.0756095	0.0812039	0.071	0.013	1
GPR63	0.0756095	0.0812039	0.071	0.013	1
AL139330.1	0.0756095	0.0812039	0.071	0.013	1
AC000065.1	0.0756095	0.0812039	0.071	0.013	1
AC021097.1	0.0756095	0.0812039	0.071	0.013	1
AC022274.1	0.0756095	0.0812039	0.071	0.013	1
C9orf153	0.0756095	0.0812039	0.071	0.013	1
TMEM72-AS1	0.0756095	0.0812039	0.071	0.013	1
AC136475.1	0.0756095	0.0812039	0.071	0.013	1
TMEM9B-AS1	0.0756095	0.0812039	0.071	0.013	1
DNAJB13	0.0756095	0.0812039	0.071	0.013	1
SMIM2-AS1	0.0756095	0.0812039	0.071	0.013	1
MIR17HG	0.0756095	0.0812039	0.071	0.013	1
AL160314.2	0.0756095	0.0812039	0.071	0.013	1
AL049869.3	0.0756095	0.0812039	0.071	0.013	1
AL157871.4	0.0756095	0.0812039	0.071	0.013	1
RASGRP1	0.0756095	0.0812039	0.071	0.013	1
AC020661.3	0.0756095	0.0812039	0.071	0.013	1
INO80-AS1	0.0756095	0.0812039	0.071	0.013	1
ELMO3	0.0756095	0.0812039	0.071	0.013	1
AC012184.4	0.0756095	0.0812039	0.071	0.013	1
MC1R	0.0756095	0.0812039	0.071	0.013	1
HASPIN	0.0756095	0.0812039	0.071	0.013	1
AC004771.3	0.0756095	0.0812039	0.071	0.013	1
PEX12	0.0756095	0.0812039	0.071	0.013	1
AC079052.1	0.0756095	0.0812039	0.071	0.013	1
TMPRSS9	0.0756095	0.0812039	0.071	0.013	1
AURKC	0.0756095	0.0812039	0.071	0.013	1
MYLK2	0.0756095	0.0812039	0.071	0.013	1
SEPTIN5	0.0756095	0.0812039	0.071	0.013	1
DDTL	0.0756095	0.0812039	0.071	0.013	1
ADORA2A	0.0756095	0.0812039	0.071	0.013	1
AL022238.2	0.0756095	0.0812039	0.071	0.013	1
WNT7B	0.0756095	0.0812039	0.071	0.013	1
MED14OS	0.0756095	0.0812039	0.071	0.013	1
MTCP1	0.0756095	0.0812039	0.071	0.013	1
REV3L	0.0756408	-0.446489	0.214	0.435	1
ZW10	0.075648	-0.295866	0	0.187	1
AC026471.1	0.0756737	0.218707	0.143	0.043	1
SLCO3A1	0.0756947	-0.292857	0	0.187	1
ARF5	0.0758585	0.479622	0.643	0.522	1
TSPAN17	0.0759476	0.253936	0.286	0.128	1
BSG	0.0759917	-0.388763	0.929	0.957	1
TPT1-AS1	0.0761284	0.186019	0.429	0.215	1
TNRC6B	0.0761635	0.455925	0.643	0.524	1
EP300	0.0761864	0.244703	0.429	0.225	1
CTSZ	0.0761918	0.289942	1	0.939	1
PPP1CA	0.076192	0.281503	0.929	0.775	1
RPL21	0.0763507	0.174867	1	1	1
HMGB2	0.0764314	0.451053	0.857	0.627	1
OR6F1	0.0765325	0.0703155	0.071	0.013	1
SEPTIN7-AS1	0.0765325	0.0775653	0.071	0.013	1
AC013287.1	0.0765325	0.0775653	0.071	0.013	1
SPON1-AS1	0.0765325	0.0775653	0.071	0.013	1
CNIH2	0.0765325	0.0775653	0.071	0.013	1
AC079313.2	0.0765325	0.0775653	0.071	0.013	1
AL049830.3	0.0765325	0.0775653	0.071	0.013	1
AC005632.3	0.0765325	0.0775653	0.071	0.013	1
SLC43A2	0.0765325	0.0739358	0.071	0.013	1
AC068442.1	0.0765325	0.0775653	0.071	0.013	1
CCL4L2	0.0765325	0.0739358	0.071	0.013	1
ACP5	0.0765325	0.0775653	0.071	0.013	1
INPP5J	0.0765325	0.0775653	0.071	0.013	1
C7orf50	0.0765575	0.463554	1	0.882	1
COL16A1	0.0766883	0.163212	0.214	0.079	1
MYLK-AS1	0.0766883	0.163212	0.214	0.079	1
MAP3K8	0.0766883	0.163212	0.214	0.079	1
RBFOX3	0.0774631	0.063102	0.071	0.013	1
NMT1	0.0774653	-0.291487	0.286	0.57	1
DENND4C	0.0775075	0.224444	0.429	0.22	1
SARNP	0.0775549	0.312499	0.929	0.775	1
BPHL	0.07783	-0.277718	0	0.184	1
SLC38A2	0.0778946	-0.484945	0.429	0.634	1
OSGEPL1	0.0779329	0.159814	0.214	0.079	1
PGF	0.077933	0.149666	0.214	0.079	1
LPIN1	0.0779501	-0.286821	0	0.184	1
LRP11	0.0780985	0.251874	0.429	0.228	1
SLC35B4	0.0781756	0.237119	0.571	0.335	1
SLC39A3	0.0781841	-0.378724	0.143	0.363	1
TP53BP1	0.0782927	-0.357794	0.214	0.465	1
SAA1	0.0783335	0.0255927	0.143	0.041	1
PPP2R3B	0.0783479	0.250697	0.286	0.128	1
CD40	0.0784014	0.0667043	0.071	0.013	1
HEXB	0.0787783	0.282433	0.643	0.419	1
PCNX2	0.079031	0.226241	0.571	0.327	1
TYRO3	0.0791919	0.15304	0.214	0.079	1
CPNE1	0.0792929	0.287294	0.857	0.616	1
CKLF	0.0793746	0.374891	1	0.931	1
FABP5	0.079434	0.483185	0.714	0.65	1
CD47	0.0795843	-0.454849	0.571	0.729	1
PCGF6	0.0797008	0.187411	0.357	0.169	1
DCTPP1	0.0797812	0.251874	0.786	0.56	1
SERPINB7	0.0798171	0.159814	0.571	0.309	1
VCP	0.0799427	-0.379875	0.857	0.908	1
VAMP7	0.0801757	-0.25934	0	0.182	1
TFPI	0.080241	0.296244	0.929	0.678	1
GOLPH3L	0.0803075	-0.265492	0	0.182	1
MAU2	0.0803075	-0.268558	0	0.182	1
SPC25	0.0804761	0.260936	0.5	0.266	1
RUNX2	0.0804984	-0.436644	0.071	0.279	1
NUBPL	0.0805461	-0.286821	0	0.182	1
GLUD1	0.0806439	0.211213	0.643	0.373	1
FAM210B	0.0807291	-0.356201	0.143	0.363	1
TMEM161B-AS1	0.0808228	0.354769	0.5	0.307	1
TRAK1	0.0808927	0.212994	0.429	0.22	1
TFCP2	0.0809665	-0.331099	0.071	0.281	1
TAF2	0.0809728	-0.339288	0.071	0.281	1
ENKD1	0.0809741	0.179179	0.286	0.123	1
PRRX2	0.0811227	-0.357642	0	0.182	1
RAMP2	0.0812064	0.218707	0.214	0.082	1
DUXAP8	0.0813171	-0.336563	0.071	0.281	1
MPDZ	0.0814448	-0.356201	0.143	0.363	1
FOXP4	0.0815988	0.235503	0.214	0.084	1
OSTF1	0.0817611	0.332209	0.714	0.637	1
FN3KRP	0.0817826	0.173619	0.5	0.256	1
TTF1	0.0817852	0.332878	0.429	0.253	1
PSMD4	0.0818191	0.30218	1	0.923	1
SESN1	0.0818531	0.295875	0.286	0.133	1
BTBD1	0.0819468	0.232434	0.5	0.279	1
MSMO1	0.0821504	0.359451	0.5	0.327	1
COMMD7	0.0821603	0.291127	0.857	0.673	1
AL627171.2	0.0821681	0.184437	0.714	0.422	1
DSCC1	0.0821871	0.153416	0.286	0.12	1
RECQL	0.0823085	0.263695	0.857	0.645	1
ZNHIT1	0.0823143	-0.33337	1	0.977	1
SRSF1	0.0827134	0.332976	0.643	0.404	1
ZBTB1	0.08275	-0.206899	0.071	0.312	1
EIF4EBP2	0.0829094	0.183083	0.429	0.217	1
DCAF11	0.0829217	-0.262419	0	0.179	1
DOT1L	0.0829222	-0.265492	0	0.179	1
SIRT7	0.0831008	-0.268558	0	0.179	1
PARL	0.0832152	0.244703	0.714	0.478	1
RPL5	0.0832921	0.164811	1	1	1
ACER3	0.0833409	0.228761	0.571	0.338	1
ARHGEF7	0.0834074	0.314734	0.429	0.233	1
CNRIP1	0.0836061	0.228761	0.571	0.327	1
TCEAL9	0.0836569	-0.364181	0.857	0.972	1
NRF1	0.0836578	0.283098	0.357	0.182	1
PNN	0.0836614	0.39938	0.786	0.609	1
DDR1	0.0837457	0.235503	0.214	0.084	1
BAG4	0.0837592	0.236855	0.357	0.176	1
ATAD2	0.0837732	0.511849	0.714	0.504	1
UQCR11	0.0838906	-0.2385	1	1	1
ING1	0.083891	0.159814	0.286	0.123	1
BGLAP	0.0839182	0.166619	0.214	0.082	1
SCARF2	0.0839182	0.166619	0.214	0.082	1
OMA1	0.0841683	0.232128	0.214	0.084	1
TNFAIP1	0.0842869	-0.317346	0.071	0.279	1
OXLD1	0.0843566	-0.407948	0.286	0.483	1
SLC44A1	0.0844234	0.295875	0.5	0.307	1
SREBF1	0.0844589	-0.311807	0.071	0.279	1
NIBAN2	0.0844664	0.22053	0.857	0.545	1
SLC16A7	0.0844677	-0.325613	0.071	0.279	1
GLRX3	0.0845823	0.275713	1	0.857	1
POLR3G	0.0848135	0.175285	0.786	0.455	1
CEP72	0.0849729	0.131245	0.143	0.043	1
AL035587.2	0.0849729	0.131245	0.143	0.043	1
NUDT7	0.0849729	0.131245	0.143	0.043	1
TUBA1B	0.0849821	0.25841	1	0.995	1
RGL2	0.085197	0.247466	0.286	0.13	1
CHKB-DT	0.0852447	0.163212	0.214	0.082	1
RRAS2	0.0852482	-0.39511	0.357	0.619	1
KLHDC3	0.0852753	0.218707	0.5	0.274	1
LYSMD2	0.0853213	-0.397093	0.286	0.486	1
CIAO1	0.0855477	0.3349	0.857	0.729	1
PEG10	0.0855639	-0.391956	0.143	0.379	1
PDCD2L	0.0856114	-0.256254	0	0.176	1
LINC01764	0.0857043	0.13291	0.214	0.079	1
FAM120C	0.0857929	-0.271618	0	0.176	1
CRYZ	0.0860079	0.338784	0.5	0.304	1
RNF111	0.0861034	0.221442	0.5	0.279	1
PPT2	0.0861455	0.127713	0.143	0.043	1
B4GALT1-AS1	0.0861455	0.127713	0.143	0.043	1
AL450326.1	0.0861455	0.127713	0.143	0.043	1
SAMD15	0.0861455	0.127713	0.143	0.043	1
LINC01583	0.0861455	0.127713	0.143	0.043	1
ARMC5	0.0861455	0.127713	0.143	0.043	1
ZNF329	0.0861455	0.127713	0.143	0.043	1
COA1	0.0862401	0.221114	1	0.818	1
PLD1	0.0863078	-0.337342	0	0.176	1
TENT4B	0.0863519	0.186019	0.429	0.22	1
NEU1	0.0864739	0.226928	0.5	0.281	1
RAD17	0.0865061	0.26924	0.5	0.299	1
SRC	0.0865857	0.159814	0.214	0.082	1
KMT2E-AS1	0.0865858	0.156423	0.214	0.082	1
BDNF-AS	0.0865858	0.156423	0.214	0.082	1
XRCC5	0.0866596	0.228976	1	0.98	1
TOM1L2	0.0869538	0.224444	0.429	0.228	1
ELP3	0.0870204	0.172695	0.286	0.125	1
AC105460.1	0.087329	0.12419	0.143	0.043	1
ANKRD33B	0.087329	0.12419	0.143	0.043	1
NAIP	0.087329	0.12419	0.143	0.043	1
CARNMT1-AS1	0.087329	0.12419	0.143	0.043	1
NDRG4	0.087329	0.12419	0.143	0.043	1
AC105460.2	0.0873291	0.120675	0.143	0.043	1
ADGRE1	0.0873579	0.159814	0.5	0.261	1
UTP20	0.0875469	-0.311807	0.071	0.276	1
ZRANB2	0.0876211	-0.389339	0.714	0.816	1
PPP1R16A	0.088037	-0.240724	0	0.174	1
CLPB	0.0880685	-0.292255	0.071	0.276	1
EIF2B1	0.0880909	0.303824	0.5	0.312	1
LSM2	0.0881002	-0.43449	0.643	0.877	1
CENPQ	0.0881854	0.289097	0.357	0.176	1
IRF9	0.0881981	-0.433048	0.214	0.419	1
HLA-B	0.0882179	-0.570376	0.857	0.964	1
TRIP4	0.0883253	0.237962	0.5	0.286	1
SENP1	0.0883807	-0.256254	0	0.174	1
WDR45B	0.0883853	0.252496	0.714	0.435	1
LRRCC1	0.0885316	0.237816	0.286	0.13	1
SERINC1	0.0886776	0.275932	0.714	0.509	1
APEH	0.0887039	0.406273	0.5	0.33	1
SLC16A4	0.0888114	-0.280759	0	0.174	1
HIST1H4C	0.0888826	0.594217	1	0.872	1
CLDND1	0.0888923	-0.33149	0.286	0.55	1
TEAD2	0.0891241	0.184319	0.357	0.171	1
SERPINE2	0.0891867	-1.03951	1	0.921	1
POMZP3	0.0893119	0.146299	0.214	0.082	1
BET1	0.0893749	-0.420078	0.357	0.529	1
DLD	0.0894381	0.258557	0.643	0.391	1
PACSIN2	0.0894446	-0.341555	0.214	0.455	1
ITFG1	0.0894952	0.28416	0.714	0.542	1
PAQR4	0.0894978	0.280108	0.357	0.187	1
FEN1	0.0897696	0.0968418	0.643	0.338	1
NCOA2	0.0898561	0.260286	0.429	0.235	1
PTDSS2	0.0899797	-0.342008	0.071	0.274	1
TRIM27	0.0903639	-0.317864	0.143	0.358	1
EIF2D	0.0903748	0.203111	0.571	0.335	1
KIRREL1	0.0904339	-0.330454	0.143	0.381	1
LAMA4	0.0904749	0.455195	0.643	0.417	1
ARHGAP11A	0.0904916	0.326464	0.357	0.184	1
CIAO2B	0.0905145	-0.252236	1	0.997	1
APP	0.0905218	-0.412268	0.429	0.772	1
IFI27L1	0.0906513	0.344238	0.857	0.65	1
FOXL1	0.0906974	0.136245	0.214	0.082	1
RIN3	0.0907025	-0.360902	0.071	0.271	1
EMC6	0.090778	-0.333262	0.929	0.939	1
LRRFIP2	0.0908432	0.260227	0.857	0.765	1
CRACR2A	0.0910311	-0.243844	0	0.171	1
ENTR1	0.0910747	0.360063	0.5	0.327	1
EIF4G2	0.091179	0.205787	1	0.967	1
DDAH2	0.0912076	0.448319	0.571	0.419	1
ASCC1	0.0912297	-0.253161	0	0.171	1
COX10	0.0912302	-0.256254	0	0.171	1
PDZD8	0.0913869	0.230203	0.429	0.23	1
APBB2	0.0915596	0.246114	1	0.824	1
CCNA2	0.0916218	0.638332	0.429	0.261	1
PPP1CC	0.0916571	0.32889	0.714	0.573	1
YWHAE	0.0917333	-0.266004	1	0.997	1
ARL1	0.0917514	-0.334498	1	0.893	1
MFSD12	0.0918515	-0.366255	0.143	0.353	1
POMGNT1	0.0919686	0.263837	0.5	0.297	1
DLG5	0.0919856	0.292105	0.357	0.189	1
TRIT1	0.0920064	0.253473	0.429	0.24	1
MCU	0.0920508	0.226241	0.571	0.338	1
OSBPL6	0.0920725	0.215705	0.357	0.176	1
LINC01162	0.0921979	0.287094	0.143	0.046	1
GIGYF2	0.0922605	0.293144	0.714	0.473	1
ZDHHC17	0.0925187	0.268748	0.429	0.24	1
RPL18A	0.0925984	-0.16482	1	1	1
AC100810.1	0.0930621	0.307548	0.643	0.488	1
DDX1	0.093117	0.267962	0.929	0.655	1
NUP43	0.0932778	0.179179	0.286	0.128	1
TOMM40	0.093322	0.283248	0.857	0.639	1
DSP	0.0934255	-0.610079	0.571	0.765	1
SNCAIP	0.0935122	0.139589	0.214	0.082	1
ATP10A	0.0935122	0.139589	0.214	0.082	1
NDUFB4	0.0937006	0.192388	1	0.997	1
RABL6	0.0937525	0.167795	0.857	0.532	1
INTS9	0.0938295	0.225402	0.214	0.087	1
PPP1R8	0.0940076	0.235985	0.429	0.233	1
TMEM250	0.0940315	-0.240724	0	0.169	1
WASF3	0.0940315	-0.240724	0	0.169	1
TFIP11	0.0940315	-0.240724	0	0.169	1
SLC39A11	0.0940981	-0.250062	0	0.169	1
USP13	0.0941298	0.171402	0.429	0.217	1
KIF18A	0.0942279	0.205698	0.429	0.22	1
HUS1	0.0942596	-0.293743	0.143	0.381	1
PTDSS1	0.0943899	-0.25934	0	0.169	1
AHNAK	0.0944115	0.292264	0.857	0.818	1
CHD9	0.0944119	0.266404	0.857	0.673	1
AC079949.3	0.0944954	-0.271618	0	0.169	1
KRTCAP2	0.0946697	-0.284436	1	0.992	1
NPR3	0.0947646	-0.337342	0	0.169	1
EEF1D	0.0951088	-0.225341	1	1	1
IFT74	0.0954202	0.339002	0.5	0.32	1
KCNQ1OT1	0.0955373	0.490424	0.357	0.189	1
MESD	0.0956096	0.295241	0.857	0.803	1
NOP56	0.0960249	0.227081	0.857	0.621	1
PLEKHA5	0.0960863	0.405259	0.857	0.673	1
ALKBH2	0.0961705	-0.306248	0.071	0.269	1
ALDH1L2	0.0962498	0.154054	0.429	0.215	1
TBPL1	0.0963828	0.176744	0.643	0.368	1
FANCA	0.0966353	0.233814	0.357	0.182	1
TROAP	0.0966468	0.268394	0.714	0.46	1
RAB3IP	0.0966641	0.303405	0.214	0.092	1
WDR35	0.0969813	-0.240724	0	0.166	1
COPZ2	0.0970034	-0.416243	0.571	0.714	1
D2HGDH	0.0970488	-0.237598	0	0.166	1
GRK2	0.0970492	-0.240724	0	0.166	1
CEPT1	0.0971147	-0.243844	0	0.166	1
SH3BP2	0.0971148	0.156423	0.214	0.084	1
ZNF81	0.0971148	0.156423	0.214	0.084	1
LINC02693	0.0971152	-0.250062	0	0.166	1
C11orf68	0.0971388	0.233814	0.571	0.35	1
TAP2	0.0971779	-0.246956	0	0.166	1
RETREG3	0.0971779	-0.246956	0	0.166	1
MRPS10	0.0972808	0.331801	0.857	0.673	1
SPG21	0.0972812	0.213906	0.643	0.399	1
MAP2K7	0.0972991	-0.262419	0	0.166	1
MED17	0.0973531	-0.256254	0	0.166	1
SIRPA	0.0973531	-0.256254	0	0.166	1
PPARD	0.0973552	0.258557	0.643	0.396	1
POC5	0.0974404	0.168954	0.357	0.174	1
AC018521.5	0.0976871	0.177231	0.429	0.223	1
CXorf38	0.0978415	0.322543	0.357	0.189	1
SNF8	0.0979156	0.254463	1	0.969	1
MYO10	0.097948	-0.400776	0.5	0.813	1
ARL5B	0.09808	0.182432	0.286	0.13	1
CAV2	0.0983514	0.315274	1	0.877	1
CCNF	0.0983601	0.261412	0.286	0.136	1
FKBP11	0.0985477	-0.420153	0.929	0.959	1
AC011447.3	0.0985826	0.15304	0.214	0.084	1
HAND2-AS1	0.0985828	0.149666	0.214	0.084	1
RFC1	0.0987597	0.49823	0.714	0.65	1
FOXM1	0.0987909	0.396494	0.357	0.205	1
NID2	0.0990354	0.323522	0.357	0.189	1
SHROOM1	0.0992032	0.367375	0.214	0.097	1
IKBKG	0.0992441	0.236855	0.357	0.184	1
WEE1	0.0996945	0.335324	0.357	0.202	1
TERF2IP	0.0998291	-0.393736	0.571	0.726	1
PSMB5	0.0999147	0.196084	1	1	1
CDYL2	0.100016	-0.228179	0	0.164	1
AC068282.1	0.100066	0.146299	0.214	0.084	1
AC002456.1	0.100066	0.146299	0.214	0.084	1
APBB1	0.100086	-0.237598	0	0.164	1
ATG9A	0.100154	-0.234465	0	0.164	1
AMPD2	0.100219	-0.243844	0	0.164	1
ACSS2	0.100219	-0.243844	0	0.164	1
CCDC28A	0.100343	-0.250062	0	0.164	1
BRAT1	0.100402	-0.25934	0	0.164	1
SNHG25	0.100419	-0.445775	0.643	0.688	1
CXXC5	0.100495	-0.325613	0.143	0.371	1
RARA	0.10056	-0.25934	0	0.164	1
DCP2	0.100603	0.397678	0.429	0.279	1
TMEM132A	0.100618	-0.383957	0.214	0.437	1
ZDBF2	0.100706	0.23078	0.357	0.187	1
MRPS26	0.100824	0.354985	0.786	0.726	1
TRPC1	0.100955	0.277697	0.571	0.366	1
ZNRD2	0.100964	0.272088	0.929	0.685	1
LINC02802	0.101023	-0.358442	0.786	0.862	1
ASPM	0.101317	0.402999	0.571	0.332	1
EIF3J	0.101349	-0.344807	0.571	0.785	1
NPL	0.101473	0.127713	0.143	0.046	1
HDAC11	0.101473	0.127713	0.143	0.046	1
GORASP1	0.101473	0.127713	0.143	0.046	1
LNP1	0.101473	0.127713	0.143	0.046	1
ZNF782	0.101473	0.127713	0.143	0.046	1
PBLD	0.101473	0.127713	0.143	0.046	1
ZNF552	0.101473	0.127713	0.143	0.046	1
SEPTIN7	0.101498	0.260885	1	0.985	1
JARID2	0.101656	-0.405783	0.214	0.409	1
ACBD5	0.101846	0.157068	0.5	0.266	1
PHLPP1	0.101922	0.234614	0.286	0.136	1
DDX17	0.101961	-0.372314	0.786	0.829	1
AZIN2	0.101988	0.205411	0.214	0.087	1
OGFR	0.102051	-0.314579	0.071	0.263	1
PRH1	0.102166	0.191639	0.5	0.281	1
METTL14	0.102287	-0.311807	0.071	0.263	1
ARFRP1	0.102327	-0.30854	0.143	0.371	1
KIF13A	0.102634	-0.218698	0.214	0.455	1
MRPS28	0.102786	0.211021	0.929	0.703	1
PIK3CD-AS2	0.102793	0.12419	0.143	0.046	1
AL021155.5	0.102793	0.12419	0.143	0.046	1
BCL2L14	0.102793	0.12419	0.143	0.046	1
MAMSTR	0.102793	0.12419	0.143	0.046	1
SLC25A11	0.102884	-0.375474	0.571	0.734	1
RPL13	0.103006	0.127237	1	1	1
MT2A	0.10307	-0.451513	1	0.99	1
LINC02492	0.103078	0.136245	0.214	0.084	1
DHTKD1	0.103127	0.172695	0.286	0.13	1
GTF2E2	0.103242	-0.332467	0.214	0.44	1
MT-CO1	0.103246	-0.274111	1	1	1
SEPTIN2	0.103258	-0.223883	0.929	0.934	1
ZNF638	0.103333	-0.368257	0.286	0.529	1
ZMYM6	0.103414	-0.246956	0	0.161	1
ATG5	0.103489	-0.293861	0.286	0.547	1
NPM3	0.103522	0.238885	0.714	0.442	1
VSIR	0.103537	-0.250062	0	0.161	1
PCYT1A	0.103606	-0.318727	0.214	0.442	1
RCHY1	0.103651	-0.25934	0	0.161	1
BLOC1S2	0.103768	0.345965	0.786	0.65	1
PPP2R2D	0.103863	0.245083	0.5	0.297	1
RANGRF	0.103866	-0.388349	0.286	0.478	1
CUL2	0.103925	0.255233	0.714	0.512	1
ORC3	0.103971	0.20511	0.5	0.286	1
FLNA	0.10402	-0.405783	0.929	0.944	1
RNF11	0.10404	-0.387317	0.214	0.412	1
SYT16	0.10407	-0.286821	0	0.161	1
PIGX	0.104108	0.156931	0.429	0.22	1
BIRC3	0.104167	-0.33149	0	0.161	1
SMIM8	0.104376	0.289097	0.357	0.197	1
PURPL	0.104473	0.172695	0.214	0.087	1
TXNDC5	0.104499	-0.432656	0.5	0.645	1
DLEU2	0.104528	0.295875	0.643	0.442	1
SNAPC3	0.104868	-0.312674	0.143	0.345	1
MRPL57	0.104944	0.222355	0.929	0.926	1
ACADSB	0.105035	0.225402	0.214	0.09	1
NEK2	0.105128	0.291558	0.357	0.179	1
PYGO2	0.105146	0.159814	0.214	0.087	1
DHX57	0.105366	0.180154	0.429	0.228	1
ANKFY1	0.105366	0.180154	0.429	0.228	1
EML2-AS1	0.105466	0.106702	0.143	0.046	1
CLYBL	0.105466	0.10323	0.143	0.046	1
HSPB6	0.105532	0.221114	0.571	0.34	1
CACYBP	0.105578	0.283301	0.857	0.839	1
PPP3R1	0.105695	0.322543	0.571	0.371	1
TMEM265	0.105821	-0.431547	0.071	0.258	1
ATF2	0.105904	-0.183009	0.071	0.292	1
SEH1L	0.106064	0.233091	0.429	0.24	1
RABIF	0.106201	-0.383957	0.286	0.465	1
NARF	0.106209	0.16222	0.643	0.366	1
C7orf69	0.106227	0.211653	0.143	0.049	1
SLC49A4	0.106375	0.237816	0.286	0.138	1
MON1B	0.106411	0.179179	0.286	0.133	1
ZNF195	0.106428	-0.218698	0	0.159	1
CHPT1	0.106493	0.235714	0.857	0.552	1
DR1	0.106551	0.400981	0.643	0.504	1
BAP1	0.106696	0.156423	0.214	0.087	1
GLT8D2	0.106696	0.156423	0.214	0.087	1
INPP5K	0.106696	0.156423	0.214	0.087	1
DYRK3	0.106762	-0.237598	0	0.159	1
EID3	0.10682	0.110183	0.143	0.046	1
CLIP3	0.10688	-0.246956	0	0.159	1
ELOB	0.106914	-0.225712	1	1	1
CDA	0.106991	-0.520511	0.143	0.335	1
ZNF720	0.107075	0.210145	0.429	0.238	1
GEN1	0.107076	0.218707	0.357	0.184	1
LINC01592	0.107104	0.43802	0.429	0.261	1
NADSYN1	0.107124	-0.28944	0.071	0.261	1
HAS2	0.107219	-0.271421	0.214	0.491	1
AC006001.2	0.107378	0.257477	0.429	0.235	1
KPNB1	0.107385	0.384817	0.857	0.777	1
IL18	0.107574	0.396494	0.286	0.143	1
HIKESHI	0.107669	0.246941	0.929	0.762	1
NETO2	0.107716	0.258639	0.643	0.455	1
MPP1	0.107895	0.417339	0.357	0.217	1
SSR4	0.108231	-0.191412	1	1	1
RAB11B-AS1	0.108262	0.15304	0.214	0.087	1
PCED1A	0.108262	0.149666	0.214	0.087	1
AC093827.4	0.108316	0.258138	0.071	0.015	1
PIK3IP1-AS1	0.108316	0.170675	0.071	0.015	1
PEX5L	0.10832	0.414973	0.071	0.015	1
STXBP5-AS1	0.108422	0.121846	0.286	0.128	1
CHSY3	0.108888	0.19782	0.357	0.182	1
UTP3	0.109104	-0.328187	0.143	0.34	1
RFTN1	0.109119	0.330254	0.571	0.389	1
PIP5K1A	0.109193	-0.229173	0.143	0.404	1
GPR137	0.109198	-0.306248	0.071	0.258	1
AP1M1	0.109399	0.313211	0.429	0.269	1
TJP2	0.109715	0.296565	0.429	0.248	1
[truncated: 23,283 more rows]

## Sheet: gRNA-5vsgRNA1-DEG
Gene	p_val	avg_log2FC	pct.1	pct.2	p_val_adj
PPARGC1B	7.24e-10	0.133267	0.097	0	1.83e-05
SH2D4B	1.99e-07	0.129581	0.097	0.003	0.00502674
AL034417.2	5.11e-07	0.0901978	0.065	0	0.0129232
LINC01693	5.11e-07	0.0901978	0.065	0	0.0129232
TGFA	5.11e-07	0.0901978	0.065	0	0.0129232
PI16	5.11e-07	0.0901978	0.065	0	0.0129232
AC005014.2	5.11e-07	0.0901978	0.065	0	0.0129232
CHRNB3	5.11e-07	0.0901978	0.065	0	0.0129232
RLN2	5.11e-07	0.0901978	0.065	0	0.0129232
AC018904.1	5.11e-07	0.0901978	0.065	0	0.0129232
ACOX2	1.68e-05	0.156755	0.129	0.013	0.423972
AC108047.1	3.74e-05	0.204504	0.194	0.033	0.945021
IL6ST	4.24e-05	-0.78739	0.387	0.734	1
FAM225A	5.7e-05	0.12224	0.097	0.008	1
AC244453.3	8.07e-05	0.0865128	0.065	0.003	1
BNIPL	8.07e-05	0.0865128	0.065	0.003	1
IL20	8.07e-05	0.0865128	0.065	0.003	1
LINC00276	8.07e-05	0.0865128	0.065	0.003	1
AC025171.4	8.07e-05	0.0865128	0.065	0.003	1
LINC01449	8.07e-05	0.0865128	0.065	0.003	1
WNT2	8.07e-05	0.0865128	0.065	0.003	1
AC004908.2	8.07e-05	0.0865128	0.065	0.003	1
CA3	8.07e-05	0.0865128	0.065	0.003	1
PRNCR1	8.07e-05	0.0865128	0.065	0.003	1
AC109322.2	8.07e-05	0.0865128	0.065	0.003	1
AC068205.1	8.07e-05	0.0865128	0.065	0.003	1
AL137785.1	8.07e-05	0.0865128	0.065	0.003	1
AC123768.3	8.07e-05	0.0865128	0.065	0.003	1
AC106793.1	8.07e-05	0.0865128	0.065	0.003	1
REPS2	8.07e-05	0.0865128	0.065	0.003	1
INPP5D	8.43e-05	0.0828371	0.065	0.003	1
CES4A	8.43e-05	0.0828371	0.065	0.003	1
B4GALT5	0.000111065	0.313572	0.484	0.184	1
SMS	0.000159822	0.465725	1	0.985	1
CCDC85B	0.000180579	-0.654128	0.903	0.98	1
TNFRSF25	0.000190888	0.149487	0.129	0.018	1
METTL25	0.000194055	0.252829	0.323	0.097	1
MTFR2	0.000212165	0.341626	0.29	0.087	1
CIB2	0.000251729	0.269547	0.29	0.084	1
BANF1	0.000294044	0.354892	0.968	0.98	1
KRBA1	0.000336143	0.214758	0.226	0.056	1
PLP2	0.000367717	0.485269	1	0.918	1
AL357140.2	0.000396531	0.0458037	0.032	0	1
AL031432.3	0.000396531	0.0458037	0.032	0	1
COL8A2	0.000396531	0.0458037	0.032	0	1
AC098484.2	0.000396531	0.0458037	0.032	0	1
AL357079.2	0.000396531	0.0458037	0.032	0	1
LINC01788	0.000396531	0.0458037	0.032	0	1
ERICH3	0.000396531	0.0458037	0.032	0	1
CLCA4	0.000396531	0.0458037	0.032	0	1
AL445438.1	0.000396531	0.0458037	0.032	0	1
BRDT	0.000396531	0.0458037	0.032	0	1
AL353807.2	0.000396531	0.0458037	0.032	0	1
ETV3L	0.000396531	0.0458037	0.032	0	1
Z99127.1	0.000396531	0.0458037	0.032	0	1
APOBEC4	0.000396531	0.0458037	0.032	0	1
TRAF3IP3	0.000396531	0.0458037	0.032	0	1
AC092803.3	0.000396531	0.0458037	0.032	0	1
AC092803.4	0.000396531	0.0458037	0.032	0	1
2023-03-01	0.000396531	0.0458037	0.032	0	1
AL391832.3	0.000396531	0.0458037	0.032	0	1
OR2L5	0.000396531	0.0458037	0.032	0	1
OR2T10	0.000396531	0.0458037	0.032	0	1
LINC01115	0.000396531	0.0458037	0.032	0	1
AC009486.2	0.000396531	0.0458037	0.032	0	1
AC007365.1	0.000396531	0.0458037	0.032	0	1
AC073046.3	0.000396531	0.0458037	0.032	0	1
TBC1D8-AS1	0.000396531	0.0458037	0.032	0	1
LYPD6B	0.000396531	0.0458037	0.032	0	1
AC061961.1	0.000396531	0.0458037	0.032	0	1
AC010680.3	0.000396531	0.0458037	0.032	0	1
KIAA2012-AS1	0.000396531	0.0458037	0.032	0	1
SPAG16-DT	0.000396531	0.0458037	0.032	0	1
AC072062.1	0.000396531	0.0458037	0.032	0	1
IGFBP2	0.000396531	0.0458037	0.032	0	1
SGPP2	0.000396531	0.0458037	0.032	0	1
AC064852.1	0.000396531	0.0458037	0.032	0	1
AC017028.1	0.000396531	0.0458037	0.032	0	1
AC005104.3	0.000396531	0.0458037	0.032	0	1
AC087857.1	0.000396531	0.0458037	0.032	0	1
GRM7-AS3	0.000396531	0.0458037	0.032	0	1
AC126118.1	0.000396531	0.0458037	0.032	0	1
ITGA9	0.000396531	0.0458037	0.032	0	1
AC104187.1	0.000396531	0.0458037	0.032	0	1
LMOD3	0.000396531	0.0458037	0.032	0	1
AC107029.1	0.000396531	0.0458037	0.032	0	1
AC012020.1	0.000396531	0.0458037	0.032	0	1
LSAMP-AS1	0.000396531	0.0458037	0.032	0	1
AC092691.1	0.000396531	0.0458037	0.032	0	1
AC112503.1	0.000396531	0.0458037	0.032	0	1
AC112484.3	0.000396531	0.0458037	0.032	0	1
GRK7	0.000396531	0.0458037	0.032	0	1
AC021074.3	0.000396531	0.0458037	0.032	0	1
AC092979.1	0.000396531	0.0458037	0.032	0	1
CCDC39	0.000396531	0.0458037	0.032	0	1
LINC01206	0.000396531	0.0458037	0.032	0	1
AC092574.1	0.000396531	0.0458037	0.032	0	1
KLB	0.000396531	0.0458037	0.032	0	1
LINC02233	0.000396531	0.0458037	0.032	0	1
AC096747.1	0.000396531	0.0458037	0.032	0	1
SELENOP	0.000396531	0.0458037	0.032	0	1
AC104113.1	0.000396531	0.0458037	0.032	0	1
MARVELD2	0.000396531	0.0458037	0.032	0	1
LINC02144	0.000396531	0.0458037	0.032	0	1
AC010240.3	0.000396531	0.0458037	0.032	0	1
AC113382.1	0.000396531	0.0458037	0.032	0	1
PCDH12	0.000396531	0.0458037	0.032	0	1
AL035693.1	0.000396531	0.0458037	0.032	0	1
AL021807.1	0.000396531	0.0458037	0.032	0	1
AL109947.1	0.000396531	0.0458037	0.032	0	1
AL627422.2	0.000396531	0.0458037	0.032	0	1
LINC00242	0.000396531	0.0458037	0.032	0	1
HOTTIP	0.000396531	0.0458037	0.032	0	1
AC011290.1	0.000396531	0.0458037	0.032	0	1
AC006355.2	0.000396531	0.0458037	0.032	0	1
CALCR	0.000396531	0.0458037	0.032	0	1
LMOD2	0.000396531	0.0458037	0.032	0	1
AC006004.1	0.000396531	0.0458037	0.032	0	1
C7orf33	0.000396531	0.0458037	0.032	0	1
EPHX2	0.000396531	0.0458037	0.032	0	1
AC007991.3	0.000396531	0.0458037	0.032	0	1
MAFA-AS1	0.000396531	0.0458037	0.032	0	1
AL160269.1	0.000396531	0.0458037	0.032	0	1
AL591506.1	0.000396531	0.0458037	0.032	0	1
TAL2	0.000396531	0.0458037	0.032	0	1
PAPPA-AS1	0.000396531	0.0458037	0.032	0	1
AL359636.1	0.000396531	0.0458037	0.032	0	1
AL158151.3	0.000396531	0.0458037	0.032	0	1
GFI1B	0.000396531	0.0458037	0.032	0	1
LINC00703	0.000396531	0.0458037	0.032	0	1
AKR1E2	0.000396531	0.0458037	0.032	0	1
AL137026.1	0.000396531	0.0458037	0.032	0	1
HKDC1	0.000396531	0.0458037	0.032	0	1
AC022400.2	0.000396531	0.0458037	0.032	0	1
ACSM6	0.000396531	0.0458037	0.032	0	1
TOLLIP-AS1	0.000396531	0.0458037	0.032	0	1
AC090587.2	0.000396531	0.0458037	0.032	0	1
AL356215.1	0.000396531	0.0458037	0.032	0	1
ALX4	0.000396531	0.0458037	0.032	0	1
AP000781.1	0.000396531	0.0458037	0.032	0	1
AP004247.2	0.000396531	0.0458037	0.032	0	1
AP001992.2	0.000396531	0.0458037	0.032	0	1
MMP1	0.000396531	0.0458037	0.032	0	1
AP002954.1	0.000396531	0.0458037	0.032	0	1
SORL1	0.000396531	0.0458037	0.032	0	1
AP001924.1	0.000396531	0.0458037	0.032	0	1
LINC02443	0.000396531	0.0458037	0.032	0	1
AC006064.5	0.000396531	0.0458037	0.032	0	1
AC008115.1	0.000396531	0.0458037	0.032	0	1
AC007527.1	0.000396531	0.0458037	0.032	0	1
LINC02387	0.000396531	0.0458037	0.032	0	1
AC126614.1	0.000396531	0.0458037	0.032	0	1
AC083809.1	0.000396531	0.0458037	0.032	0	1
AC079907.1	0.000396531	0.0458037	0.032	0	1
RFX4	0.000396531	0.0458037	0.032	0	1
LINC01498	0.000396531	0.0458037	0.032	0	1
CFAP73	0.000396531	0.0458037	0.032	0	1
AL359538.4	0.000396531	0.0458037	0.032	0	1
URAD	0.000396531	0.0458037	0.032	0	1
AL354696.1	0.000396531	0.0458037	0.032	0	1
CCDC70	0.000396531	0.0458037	0.032	0	1
LINC01068	0.000396531	0.0458037	0.032	0	1
AL163541.1	0.000396531	0.0458037	0.032	0	1
LINC00596	0.000396531	0.0458037	0.032	0	1
AL442163.1	0.000396531	0.0458037	0.032	0	1
LINC02324	0.000396531	0.0458037	0.032	0	1
ADAM21	0.000396531	0.0458037	0.032	0	1
AL162171.1	0.000396531	0.0458037	0.032	0	1
AC090510.1	0.000396531	0.0458037	0.032	0	1
AC012170.3	0.000396531	0.0458037	0.032	0	1
AC023906.5	0.000396531	0.0458037	0.032	0	1
PAQR5	0.000396531	0.0458037	0.032	0	1
CT62	0.000396531	0.0458037	0.032	0	1
SV2B	0.000396531	0.0458037	0.032	0	1
AC009041.4	0.000396531	0.0458037	0.032	0	1
NLRC3	0.000396531	0.0458037	0.032	0	1
CIITA	0.000396531	0.0458037	0.032	0	1
AC009121.3	0.000396531	0.0458037	0.032	0	1
AC002550.1	0.000396531	0.0458037	0.032	0	1
APOBR	0.000396531	0.0458037	0.032	0	1
NKD1	0.000396531	0.0458037	0.032	0	1
TPPP3	0.000396531	0.0458037	0.032	0	1
AC009097.4	0.000396531	0.0458037	0.032	0	1
AC138627.1	0.000396531	0.0458037	0.032	0	1
AC032044.1	0.000396531	0.0458037	0.032	0	1
AC135178.4	0.000396531	0.0458037	0.032	0	1
SPACA3	0.000396531	0.0458037	0.032	0	1
HNF1B	0.000396531	0.0458037	0.032	0	1
AC015936.1	0.000396531	0.0458037	0.032	0	1
AC091180.4	0.000396531	0.0458037	0.032	0	1
RNFT1-DT	0.000396531	0.0458037	0.032	0	1
NPB	0.000396531	0.0458037	0.032	0	1
AP005203.1	0.000396531	0.0458037	0.032	0	1
AC022809.1	0.000396531	0.0458037	0.032	0	1
AC016382.1	0.000396531	0.0901978	0.032	0	1
ONECUT2	0.000396531	0.0458037	0.032	0	1
AC091691.3	0.000396531	0.0458037	0.032	0	1
MISP	0.000396531	0.0458037	0.032	0	1
SMIM24	0.000396531	0.0458037	0.032	0	1
AC007786.1	0.000396531	0.0458037	0.032	0	1
AC020907.1	0.000396531	0.0458037	0.032	0	1
AC011443.1	0.000396531	0.0458037	0.032	0	1
NCCRP1	0.000396531	0.0458037	0.032	0	1
SRRM5	0.000396531	0.0458037	0.032	0	1
AC011466.1	0.000396531	0.0458037	0.032	0	1
FUT2	0.000396531	0.0458037	0.032	0	1
NUCB1-AS1	0.000396531	0.0458037	0.032	0	1
AC005261.2	0.000396531	0.0458037	0.032	0	1
DEFB126	0.000396531	0.0458037	0.032	0	1
LINC01754	0.000396531	0.0458037	0.032	0	1
FP236241.1	0.000396531	0.0458037	0.032	0	1
SLC37A1	0.000396531	0.0458037	0.032	0	1
ITGB2-AS1	0.000396531	0.0458037	0.032	0	1
AC002059.1	0.000396531	0.0458037	0.032	0	1
GTSE1-DT	0.000396531	0.0458037	0.032	0	1
NDP	0.000396531	0.0458037	0.032	0	1
UXT-AS1	0.000396531	0.0458037	0.032	0	1
FAM133A	0.000396531	0.133267	0.032	0	1
ARMCX3-AS1	0.000396531	0.0458037	0.032	0	1
BHLHB9	0.000396531	0.0458037	0.032	0	1
LHFPL1	0.000396531	0.0458037	0.032	0	1
AL135784.1	0.000396531	0.0458037	0.032	0	1
AF274853.1	0.000396531	0.0458037	0.032	0	1
AL122035.1	0.000404946	0.193857	0.194	0.043	1
SUMO2	0.000427024	0.286255	1	1	1
FMO4	0.000475954	0.145867	0.129	0.02	1
SDHAF3	0.000566512	0.319247	0.645	0.309	1
ZNF620	0.000713655	0.183287	0.194	0.046	1
ETF1	0.000717133	-0.524778	0.258	0.558	1
ACADS	0.000746153	0.207788	0.226	0.061	1
RBSN	0.000779662	0.319304	0.419	0.171	1
AC093323.1	0.000779766	0.200852	0.226	0.061	1
2023-03-07	0.000926286	-0.498638	0.258	0.537	1
MAP3K9	0.000934463	0.156755	0.097	0.013	1
BLVRA	0.000953321	0.368067	0.774	0.458	1
ANKRD23	0.000989752	0.114935	0.097	0.013	1
AC009951.6	0.000989752	0.114935	0.097	0.013	1
GPR63	0.000989752	0.114935	0.097	0.013	1
P2RX5	0.000989752	0.114935	0.097	0.013	1
HASPIN	0.000989752	0.114935	0.097	0.013	1
ZNF17	0.000989752	0.114935	0.097	0.013	1
C22orf23	0.000989752	0.114935	0.097	0.013	1
ENO1	0.00100265	0.292808	1	1	1
CCDC17	0.00104899	0.0828371	0.065	0.005	1
KRTCAP3	0.00104899	0.0828371	0.065	0.005	1
AC015971.1	0.00104899	0.0828371	0.065	0.005	1
TH2LCRR	0.00104899	0.0828371	0.065	0.005	1
CAPN11	0.00104899	0.0828371	0.065	0.005	1
IL15RA	0.00104899	0.0828371	0.065	0.005	1
AL138762.1	0.00104899	0.0828371	0.065	0.005	1
CASC1	0.00104899	0.0828371	0.065	0.005	1
AC020637.1	0.00104899	0.0828371	0.065	0.005	1
AL359237.1	0.00104899	0.0828371	0.065	0.005	1
ANKRD13B	0.00104899	0.0828371	0.065	0.005	1
AC015987.1	0.00108347	0.0791708	0.065	0.005	1
SNRNP25	0.0011341	0.612434	0.774	0.693	1
ADA	0.00115611	0.247043	0.387	0.153	1
BHLHE41	0.00122408	0.352119	0.613	0.299	1
NECTIN3-AS1	0.00128366	0.176284	0.161	0.036	1
C11orf1	0.00128761	0.239593	0.323	0.118	1
FRA10AC1	0.00135187	0.435281	0.613	0.34	1
DOCK5	0.00141527	-0.61166	0.645	0.844	1
APOLD1	0.0014162	0.217494	0.419	0.171	1
XRRA1	0.00147793	-0.409261	0.032	0.299	1
ANKMY2	0.00148785	0.276509	0.452	0.202	1
NHS	0.00149221	-0.422398	0	0.253	1
RNF141	0.00149802	0.257791	0.613	0.299	1
DCTN6	0.00151996	0.392413	0.839	0.637	1
UBE2A	0.00154563	0.396022	0.903	0.834	1
DUSP16	0.00165628	0.172795	0.194	0.051	1
OSBPL6	0.00172929	0.301524	0.419	0.176	1
MSMO1	0.00196133	0.240091	0.645	0.327	1
FBXO43	0.00204047	0.157869	0.161	0.038	1
LIPT2	0.00204047	0.157869	0.161	0.038	1
TCTE3	0.00207134	0.13506	0.129	0.026	1
RNASE4	0.00208036	0.229746	0.323	0.123	1
SLC39A3	0.00214048	0.307324	0.645	0.363	1
NIPSNAP1	0.00219922	0.294637	0.581	0.304	1
STXBP6	0.00241801	0.240811	0.452	0.202	1
CFAP46	0.00253107	0.210572	0.29	0.105	1
FAM155A	0.00256944	-0.704628	0.581	0.777	1
CSRNP2	0.00261796	0.276288	0.258	0.092	1
ADARB1	0.00263092	-0.536943	0.226	0.499	1
SPRED3	0.00267854	0.220533	0.29	0.107	1
IARS	0.0029208	0.28486	0.774	0.509	1
SLC10A3	0.00292991	0.311536	0.452	0.215	1
CD3EAP	0.0029574	0.379124	0.484	0.251	1
AP3M2	0.00299168	0.279524	0.419	0.189	1
STX12	0.00302336	-0.514877	0.355	0.596	1
GPR89B	0.0030658	0.157869	0.161	0.041	1
ZNF174	0.00316972	0.176284	0.194	0.056	1
GGCX	0.00317627	0.285903	0.613	0.33	1
H3F3B	0.0031865	0.282122	1	1	1
STMN1	0.00322177	0.477996	0.968	0.898	1
MVK	0.00334755	0.233923	0.258	0.092	1
ZC3H4	0.00350119	0.247043	0.355	0.151	1
KIF2C	0.00363507	0.646259	0.419	0.217	1
SFR1	0.0036512	0.29193	0.29	0.113	1
SOWAHC	0.00367155	0.1279	0.129	0.028	1
LINC02475	0.00376983	0.217205	0.258	0.092	1
SAMD3	0.00377644	-0.784607	0.258	0.506	1
EEF1G	0.0038454	0.192026	1	1	1
MFSD6	0.00394875	0.197397	0.258	0.092	1
SLC27A4	0.00397288	0.218907	0.387	0.169	1
LCORL	0.0040766	0.372797	0.484	0.246	1
PPA2	0.00409827	-0.435821	0.419	0.66	1
CCAR2	0.00410059	0.194038	0.258	0.092	1
EXOC3-AS1	0.0041006	0.190687	0.258	0.092	1
POLR3G	0.004117	0.496593	0.677	0.455	1
MRPS6	0.00419777	0.371426	0.935	0.762	1
SOGA1	0.00426411	0.407469	0.452	0.23	1
FAM83D	0.00436115	0.250836	0.355	0.153	1
WFS1	0.00436889	0.227213	0.258	0.095	1
GRAMD1B	0.00443523	-0.56728	0.226	0.514	1
CSK	0.00449809	0.280016	0.484	0.251	1
EMC1-AS1	0.00453526	0.169314	0.194	0.059	1
NUDT7	0.00458244	0.154328	0.161	0.043	1
FBXW11	0.00461718	-0.40014	0.29	0.563	1
SNX2	0.00463597	0.314754	0.71	0.465	1
RPE	0.00465682	-0.393798	0.129	0.376	1
LINC01583	0.00472954	0.150796	0.161	0.043	1
RPL8	0.00477392	0.170271	1	1	1
KAT8	0.00477964	0.241791	0.323	0.136	1
UBTD2	0.00478145	0.2735	0.419	0.205	1
LINC01748	0.00479821	0.12224	0.065	0.008	1
AC008083.2	0.00479821	0.12224	0.065	0.008	1
AC130324.2	0.00479821	0.12224	0.065	0.008	1
JAZF1	0.00489377	-0.492446	0.29	0.545	1
ETS2	0.00490373	0.249509	0.258	0.095	1
AC017048.3	0.00498401	0.0791708	0.065	0.008	1
AC006058.1	0.00498401	0.0791708	0.065	0.008	1
FAM83A	0.00498401	0.0791708	0.065	0.008	1
AL133215.2	0.00498401	0.0791708	0.065	0.008	1
LBHD1	0.00498401	0.0791708	0.065	0.008	1
AP001372.2	0.00498401	0.0791708	0.065	0.008	1
ESR2	0.00498401	0.0791708	0.065	0.008	1
CGNL1	0.00498401	0.0791708	0.065	0.008	1
ZNF319	0.00498401	0.0791708	0.065	0.008	1
PROCA1	0.00498401	0.0791708	0.065	0.008	1
PNMA8A	0.00498401	0.0791708	0.065	0.008	1
AL049646.1	0.00498401	0.0791708	0.065	0.008	1
MTRNR2L10	0.00498401	0.0791708	0.065	0.008	1
LIN28B	0.00511174	0.20807	0.129	0.031	1
AC096555.1	0.00511231	0.0755138	0.065	0.008	1
LINC02832	0.00511231	0.0755138	0.065	0.008	1
SGCZ	0.00511231	0.0755138	0.065	0.008	1
SULT1A3	0.00511231	0.0755138	0.065	0.008	1
RASD1	0.00511231	0.0755138	0.065	0.008	1
PSMG1	0.00516506	0.433792	0.774	0.524	1
NCOA7	0.00529652	-0.496123	0.194	0.44	1
TBC1D25	0.00532983	0.173437	0.226	0.077	1
LIN7B	0.00537532	0.362052	0.613	0.373	1
TPI1	0.00538526	0.199627	1	1	1
CLIP1	0.00539897	-0.472455	0.355	0.598	1
SWAP70	0.00546266	0.262144	0.677	0.396	1
ZCCHC14	0.00552168	0.217717	0.226	0.079	1
CAMK2N2	0.00555675	0.107667	0.097	0.018	1
AL589684.1	0.00555675	0.107667	0.097	0.018	1
QRICH2	0.00555675	0.107667	0.097	0.018	1
DSCR4	0.00555675	0.107667	0.097	0.018	1
APOBEC3B	0.00555675	0.107667	0.097	0.018	1
WWTR1	0.00557347	-0.472455	0.355	0.588	1
ZBTB22	0.00561146	0.197397	0.194	0.061	1
NIF3L1	0.00571283	0.301348	0.516	0.279	1
TUBA1B	0.00572486	0.432723	1	0.995	1
AC053527.2	0.00588756	0.131475	0.129	0.031	1
LEPROT	0.00597559	-0.423989	0.516	0.772	1
FASTKD1	0.00598363	0.218907	0.355	0.156	1
GIHCG	0.00599549	0.266729	0.71	0.43	1
ERMP1	0.0060583	0.1279	0.129	0.031	1
CTSW	0.0060583	0.1279	0.129	0.031	1
FOSL2	0.00607304	0.242693	0.548	0.294	1
N4BP2L2	0.00609239	-0.456513	0.419	0.67	1
EFHC2	0.00612887	0.186802	0.161	0.046	1
ARL15	0.00621356	0.248744	0.548	0.284	1
CALHM6	0.00623317	0.124333	0.129	0.031	1
PRDM2	0.00654015	0.284689	0.452	0.235	1
NDUFAF6	0.00660131	0.267262	0.516	0.286	1
ZNF431	0.00666316	0.207026	0.323	0.138	1
KLHL36	0.00667917	0.236677	0.387	0.184	1
PRR4	0.00681087	0.147273	0.161	0.046	1
TLE3	0.00681087	0.147273	0.161	0.046	1
USE1	0.00685526	0.235365	0.677	0.384	1
EIF4E	0.00700976	0.364397	0.774	0.639	1
AADAT	0.00703415	0.194122	0.29	0.118	1
DOCK1	0.00713097	-0.456234	0.323	0.552	1
CSE1L	0.00721608	0.436892	0.581	0.366	1
ZDHHC5	0.00729069	0.365062	0.548	0.327	1
ZNF106	0.00733743	-0.447508	0.516	0.696	1
SEPTIN11	0.00741413	0.396961	0.903	0.867	1
CCNA2	0.00758529	0.571661	0.452	0.261	1
ADGRE5	0.00760607	0.289258	0.581	0.338	1
CDC5L	0.00762389	-0.274937	0.258	0.555	1
DOCK2	0.00786758	0.180679	0.258	0.1	1
RPP30	0.00790746	0.374034	0.71	0.517	1
CSAG1	0.0080196	0.408901	0.355	0.169	1
NUF2	0.00802323	0.582404	0.484	0.292	1
PGAM5	0.00825836	0.225112	0.355	0.164	1
AC002066.1	0.00826009	0.219965	0.258	0.102	1
ADCY6	0.00833751	-0.265492	0	0.187	1
RGS9	0.00836674	0.158923	0.194	0.064	1
MRPL52	0.00843901	0.216055	1	1	1
SSBP3	0.0084569	-0.391308	0.129	0.353	1
DGKZ	0.00847313	0.197397	0.452	0.225	1
CSTF2T	0.00867136	0.190687	0.258	0.102	1
SLC35B4	0.00873687	0.239141	0.581	0.335	1
MAGI1	0.00877576	-0.56764	0.516	0.721	1
C10orf88	0.00880642	0.228225	0.355	0.166	1
TGFBR2	0.00890071	-0.417848	0.226	0.458	1
TIMM22	0.00900772	0.212321	0.613	0.343	1
UBE2L6	0.0090614	-0.369732	0.129	0.373	1
MBNL1	0.00909889	-0.499824	0.742	0.903	1
MAEA	0.00910315	0.249769	0.548	0.309	1
NPLOC4	0.00914893	-0.354399	0.226	0.463	1
CPSF1	0.00918295	0.245015	0.29	0.125	1
ZNF582	0.00924392	0.147273	0.161	0.049	1
TUBB3	0.00925564	0.305852	0.968	0.882	1
CTTNBP2NL	0.00951501	-0.381592	0.29	0.537	1
TGFB1I1	0.00953673	0.404663	0.903	0.9	1
PNMA1	0.00959769	0.197397	0.387	0.187	1
CDCA8	0.00975208	0.61963	0.355	0.192	1
OPTN	0.00978998	-0.402996	0.516	0.762	1
BUB1	0.00980968	0.327327	0.452	0.24	1
C2CD2	0.00988964	-0.3322	0.065	0.274	1
AC098487.1	0.00993008	0.18708	0.194	0.066	1
INVS	0.0100015	-0.351106	0.097	0.312	1
FAM24B	0.0101138	0.249653	0.387	0.192	1
VTI1B	0.010244	-0.377745	0.677	0.811	1
SPANXB1	0.0102777	0.385801	0.516	0.292	1
PKD2L2	0.0104341	0.104046	0.097	0.02	1
GATAD2A	0.0106417	-0.354686	0.161	0.417	1
AC090579.1	0.0106888	0.100435	0.097	0.02	1
DUSP8	0.0106888	0.100435	0.097	0.02	1
KDM2B-DT	0.0106888	0.100435	0.097	0.02	1
SYCE2	0.0106888	0.100435	0.097	0.02	1
RPUSD4	0.0107108	0.194122	0.29	0.125	1
C5orf56	0.0107613	-0.25934	0	0.176	1
NOS1AP	0.0109485	0.0968329	0.097	0.02	1
UBR3	0.0110504	-0.399659	0.161	0.373	1
FILIP1L	0.0115251	-0.44021	0.355	0.581	1
LRRC8A	0.01153	0.229106	0.419	0.217	1
BMI1	0.0115687	0.285806	0.516	0.299	1
SKA3	0.0116376	0.332018	0.387	0.202	1
KANSL1	0.0116588	-0.400622	0.226	0.46	1
CKLF	0.0117648	0.237038	0.968	0.931	1
CENPM	0.0118466	0.31377	0.581	0.332	1
WDR13	0.0120198	-0.412168	0.194	0.404	1
NPRL3	0.0120615	0.188869	0.484	0.253	1
PRR16	0.0120883	0.355292	0.516	0.294	1
TSR1	0.0122028	0.269098	0.645	0.407	1
SLC7A6OS	0.0122454	0.326094	0.419	0.23	1
TGM2	0.0122906	-0.558356	0.968	0.936	1
CDV3	0.0123912	-0.407914	0.645	0.752	1
ANKRD17	0.0125043	-0.369972	0.355	0.598	1
CD82	0.0125648	0.214606	0.419	0.217	1
RPS3A	0.0125869	0.144335	1	1	1
RPS5	0.0126219	0.148981	1	1	1
BATF3	0.012687	0.197397	0.355	0.169	1
DUSP6	0.0127341	-0.300274	0.032	0.22	1
CCDC127	0.0127685	0.354082	0.484	0.276	1
ZNRF3	0.0127696	0.233021	0.258	0.107	1
TMEM185B	0.0129513	0.18496	0.355	0.169	1
RAD51AP1	0.0129694	0.276007	0.355	0.176	1
LAGE3	0.0130166	0.371833	0.774	0.657	1
RNF10	0.0130933	-0.417519	0.258	0.458	1
ZNF738	0.013173	0.164154	0.258	0.105	1
SIAH1	0.0132637	0.20937	0.387	0.197	1
GNPDA1	0.0132853	0.369547	0.548	0.376	1
GRPEL2	0.0134961	0.155475	0.194	0.069	1
FAM104B	0.013539	0.305264	0.516	0.312	1
HJURP	0.0136012	0.562852	0.387	0.22	1
SYNGR3	0.01361	0.124333	0.129	0.036	1
SAC3D1	0.013748	0.420056	0.677	0.514	1
WDR35	0.0138163	-0.240724	0	0.166	1
AC099489.1	0.0138175	0.156755	0.065	0.01	1
RNF213	0.0138332	-0.35216	0.387	0.616	1
MAPK12	0.0138441	0.214991	0.419	0.22	1
GRIK2	0.0138693	-0.622244	0.226	0.435	1
MTRF1L	0.0139273	0.25473	0.613	0.373	1
AC022210.2	0.0139507	0.117227	0.129	0.036	1
ITPA	0.0139699	-0.347673	0.226	0.458	1
MED10	0.0140031	-0.358587	0.581	0.78	1
FANCD2	0.0141071	0.153212	0.226	0.087	1
THADA	0.0141294	-0.35088	0.129	0.335	1
ARHGDIA	0.0141674	0.258761	1	0.936	1
SLC25A16	0.0142294	0.239743	0.355	0.179	1
AC118553.1	0.0142523	0.0755138	0.065	0.01	1
LYG1	0.0142523	0.0755138	0.065	0.01	1
SCG2	0.0142523	0.0755138	0.065	0.01	1
AC006058.3	0.0142523	0.0755138	0.065	0.01	1
FRG1-DT	0.0142523	0.0755138	0.065	0.01	1
AC106791.1	0.0142523	0.0755138	0.065	0.01	1
TCP11	0.0142523	0.0755138	0.065	0.01	1
HOXA4	0.0142523	0.0755138	0.065	0.01	1
AC007255.1	0.0142523	0.0755138	0.065	0.01	1
CSMD1	0.0142523	0.0755138	0.065	0.01	1
INSL6	0.0142523	0.0755138	0.065	0.01	1
MUSK	0.0142523	0.0755138	0.065	0.01	1
C9orf147	0.0142523	0.0755138	0.065	0.01	1
FGFBP3	0.0142523	0.0755138	0.065	0.01	1
MMP26	0.0142523	0.0755138	0.065	0.01	1
RAD9B	0.0142523	0.0755138	0.065	0.01	1
AC068790.9	0.0142523	0.0755138	0.065	0.01	1
AC093519.2	0.0142523	0.0755138	0.065	0.01	1
LINC00663	0.0142523	0.0755138	0.065	0.01	1
CDC25A	0.0142764	0.148605	0.194	0.069	1
TRIM28	0.0143633	0.472566	0.742	0.639	1
ZNF3	0.0143783	0.207788	0.161	0.054	1
RFK	0.0144938	0.299276	0.613	0.402	1
IGF2R	0.0144951	-0.41398	0.258	0.473	1
CTSV	0.0145519	0.0609777	0.065	0.01	1
SIGLEC7	0.0145519	0.071866	0.065	0.01	1
SNAP25-AS1	0.0145519	0.071866	0.065	0.01	1
MAP1A	0.0146011	-0.434576	0.323	0.522	1
FAXC	0.0146528	0.113686	0.129	0.036	1
TRAPPC1	0.0147245	0.242266	1	0.985	1
ARL5B	0.0147845	0.187594	0.29	0.13	1
FAF2	0.0148347	-0.380431	0.29	0.514	1
CMTM7	0.0150477	0.249653	0.387	0.205	1
USP12	0.0150888	0.303192	0.516	0.317	1
SNRPA	0.0152458	0.367784	0.677	0.506	1
SLC29A1	0.0153505	0.228424	0.452	0.248	1
MAP3K13	0.0153509	-0.399755	0.387	0.614	1
CDKN3	0.015612	0.483346	0.742	0.519	1
PAAF1	0.0156458	0.271538	0.452	0.261	1
SYT16	0.0158625	-0.286821	0	0.161	1
MEA1	0.0158678	0.318683	0.903	0.816	1
LEMD3	0.0159906	0.17833	0.323	0.151	1
COASY	0.0160054	0.231278	0.452	0.253	1
CD163L1	0.0161122	-0.355996	0.129	0.33	1
PRKAR2B	0.0161704	0.187832	0.29	0.13	1
MAGEA12	0.0162574	0.317342	0.29	0.13	1
ATP5MC3	0.0163295	0.179732	1	1	1
TBC1D2	0.0163582	0.311899	0.516	0.32	1
UBXN4	0.0164192	-0.328498	0.871	0.941	1
LINC00174	0.0164217	0.174046	0.226	0.09	1
YTHDF1	0.0165286	0.167444	0.258	0.11	1
AC091607.2	0.0165514	0.142255	0.097	0.023	1
EZR	0.0165604	0.407696	0.839	0.772	1
RPN1	0.016647	-0.367714	0.452	0.657	1
DNAJA1	0.0167186	0.270955	0.968	0.974	1
AHRR	0.0167299	-0.250062	0	0.159	1
FAM110B	0.0168454	0.216256	0.29	0.133	1
CABYR	0.0169272	0.221132	0.194	0.074	1
CENPJ	0.0170193	0.188482	0.387	0.194	1
Z93930.2	0.0171124	0.190687	0.226	0.092	1
ATAD3A	0.0172072	0.223869	0.387	0.202	1
PPIF	0.0172371	0.232215	0.645	0.425	1
CALM2	0.0172769	0.226142	1	1	1
RERGL	0.0174156	0.120776	0.097	0.023	1
SGSH	0.0174696	0.148605	0.194	0.072	1
CDADC1	0.0175627	0.164154	0.258	0.11	1
NTNG1	0.0176235	0.26611	0.258	0.115	1
AC090644.1	0.0176591	0.100435	0.097	0.023	1
MANEA-DT	0.0176591	0.100435	0.097	0.023	1
RASA4B	0.0176591	0.100435	0.097	0.023	1
KLHL35	0.0176591	0.100435	0.097	0.023	1
UBE2Q2L	0.0176591	0.100435	0.097	0.023	1
DHRS13	0.0176591	0.100435	0.097	0.023	1
AP001011.1	0.0176591	0.100435	0.097	0.023	1
ZFYVE27	0.0176784	-0.218698	0	0.156	1
ABCA5	0.0176827	-0.282751	0.032	0.207	1
SPC25	0.0177139	0.413655	0.452	0.266	1
MIIP	0.0177384	0.206367	0.387	0.199	1
AMPH	0.0177707	0.161418	0.129	0.038	1
TOP2A	0.0178108	0.832291	0.548	0.35	1
LRRCC1	0.0179368	0.164975	0.29	0.13	1
WDYHV1	0.0180054	0.216651	0.484	0.276	1
YWHAQ	0.0180375	0.287903	1	0.913	1
LRIG2-DT	0.0180475	0.0968329	0.097	0.023	1
TTI1	0.0180994	0.160871	0.258	0.11	1
IMMP1L	0.018153	0.246545	0.613	0.379	1
AC036176.1	0.0181898	0.157869	0.129	0.038	1
ORC3	0.0182133	0.242693	0.484	0.286	1
PSMB3	0.0182456	0.208602	0.968	0.995	1
ZNF512	0.01832	0.182226	0.355	0.174	1
CSTF2	0.0183672	0.16637	0.484	0.258	1
LINC00578	0.0184064	-0.534206	0.258	0.486	1
FAM110A	0.0184331	0.141768	0.194	0.072	1
TUFM	0.0184387	0.226317	1	0.926	1
GALNT15	0.0184426	0.0932396	0.097	0.023	1
CENPX	0.0184929	0.335749	0.968	0.926	1
MALAT1	0.0185472	-0.443727	1	1	1
CALD1	0.0186825	-0.30497	0.968	1	1
RBM42	0.0190425	0.387962	0.677	0.506	1
REV1	0.019059	-0.290299	0.065	0.248	1
NAXD	0.0190797	0.159922	0.226	0.092	1
LRBA	0.0192143	-0.453596	0.29	0.496	1
CDCA3	0.019216	0.385975	0.484	0.274	1
NSMCE3	0.0192508	-0.350091	0.226	0.432	1
REL	0.0192953	-0.290299	0.065	0.248	1
AC017002.3	0.0193592	0.120776	0.129	0.038	1
SLC25A20	0.0193592	0.120776	0.129	0.038	1
METTL5	0.0195062	0.319093	0.903	0.831	1
ACAT1	0.0195924	0.390754	0.677	0.575	1
PNPLA8	0.0198443	-0.336716	0.258	0.473	1
TUBA1A	0.0198646	0.385039	1	0.931	1
SNRPE	0.0199103	0.274839	1	0.982	1
TIPIN	0.0199133	0.259026	0.484	0.271	1
HIST1H3G	0.0199599	0.124815	0.194	0.072	1
PBX2	0.0200252	-0.218698	0	0.151	1
RERE	0.0200833	-0.390038	0.516	0.65	1
ATP6V1G1	0.0201278	-0.254829	0.903	0.987	1
ACTR8	0.0204401	0.200523	0.323	0.159	1
PPM1A	0.020481	0.20045	0.355	0.182	1
NFKBIA	0.0206457	-0.30745	0.452	0.637	1
B4GALT3	0.0206506	0.200251	0.452	0.253	1
RPS15	0.0208222	0.125075	1	1	1
MTG1	0.020839	-0.386673	0.452	0.624	1
VPS13B-DT	0.0209714	0.16889	0.323	0.156	1
FO704657.1	0.0209723	0.0421186	0.032	0.003	1
HES5	0.0209723	0.0421186	0.032	0.003	1
CDC42-AS1	0.0209723	0.0421186	0.032	0.003	1
FAM110D	0.0209723	0.0421186	0.032	0.003	1
AL354919.1	0.0209723	0.0421186	0.032	0.003	1
RIMS3	0.0209723	0.0421186	0.032	0.003	1
AL604028.1	0.0209723	0.0421186	0.032	0.003	1
FOXD2	0.0209723	0.0421186	0.032	0.003	1
AC117944.1	0.0209723	0.0421186	0.032	0.003	1
COL11A1	0.0209723	0.0421186	0.032	0.003	1
TSACC	0.0209723	0.0421186	0.032	0.003	1
C1orf105	0.0209723	0.0421186	0.032	0.003	1
AL353708.3	0.0209723	0.0421186	0.032	0.003	1
AC096637.2	0.0209723	0.0421186	0.032	0.003	1
PROX1	0.0209723	0.0421186	0.032	0.003	1
USH2A	0.0209723	0.0421186	0.032	0.003	1
AL512343.2	0.0209723	0.0421186	0.032	0.003	1
AL353689.3	0.0209723	0.0421186	0.032	0.003	1
LINC00582	0.0209723	0.0421186	0.032	0.003	1
AC012073.1	0.0209723	0.0421186	0.032	0.003	1
AC012370.2	0.0209723	0.0421186	0.032	0.003	1
AC007389.5	0.0209723	0.0421186	0.032	0.003	1
AC073046.4	0.0209723	0.0421186	0.032	0.003	1
LRRTM4	0.0209723	0.0421186	0.032	0.003	1
PLGLB1	0.0209723	0.0421186	0.032	0.003	1
AC092620.1	0.0209723	0.0421186	0.032	0.003	1
AC079584.1	0.0209723	0.0421186	0.032	0.003	1
DLX2-DT	0.0209723	0.0421186	0.032	0.003	1
LINC01877	0.0209723	0.0421186	0.032	0.003	1
AC053503.1	0.0209723	0.0421186	0.032	0.003	1
SLC16A14	0.0209723	0.0421186	0.032	0.003	1
AC005237.1	0.0209723	0.0421186	0.032	0.003	1
AC023481.1	0.0209723	0.0421186	0.032	0.003	1
SLC6A1	0.0209723	0.0421186	0.032	0.003	1
NUP210	0.0209723	0.0421186	0.032	0.003	1
SLC22A14	0.0209723	0.0421186	0.032	0.003	1
SNRK-AS1	0.0209723	0.0421186	0.032	0.003	1
LSMEM2	0.0209723	0.0421186	0.032	0.003	1
CADM2	0.0209723	0.0421186	0.032	0.003	1
LINC01990	0.0209723	0.0421186	0.032	0.003	1
CD86	0.0209723	0.0421186	0.032	0.003	1
SERPINI2	0.0209723	0.0421186	0.032	0.003	1
TM4SF19	0.0209723	0.0421186	0.032	0.003	1
LINC01587	0.0209723	0.0421186	0.032	0.003	1
AC105916.1	0.0209723	0.0421186	0.032	0.003	1
SHISA3	0.0209723	0.0421186	0.032	0.003	1
AC027271.1	0.0209723	0.0421186	0.032	0.003	1
LRRC66	0.0209723	0.0421186	0.032	0.003	1
AC110615.1	0.0209723	0.0421186	0.032	0.003	1
FSTL5	0.0209723	0.0421186	0.032	0.003	1
ENPP6	0.0209723	0.0421186	0.032	0.003	1
LINC02103	0.0209723	0.0421186	0.032	0.003	1
AC034223.2	0.0209723	0.0421186	0.032	0.003	1
AC026801.2	0.0209723	0.0421186	0.032	0.003	1
NIM1K	0.0209723	0.0421186	0.032	0.003	1
AC093297.2	0.0209723	0.0421186	0.032	0.003	1
AC008966.3	0.0209723	0.0421186	0.032	0.003	1
AC122697.1	0.0209723	0.0421186	0.032	0.003	1
SLCO4C1	0.0209723	0.0421186	0.032	0.003	1
SEMA6A	0.0209723	0.0421186	0.032	0.003	1
AC106786.2	0.0209723	0.0421186	0.032	0.003	1
GDF9	0.0209723	0.0421186	0.032	0.003	1
SLC25A48	0.0209723	0.0421186	0.032	0.003	1
KIF4B	0.0209723	0.0421186	0.032	0.003	1
C5orf52	0.0209723	0.0421186	0.032	0.003	1
SERPINB9P1	0.0209723	0.0421186	0.032	0.003	1
TUBB2B	0.0209723	0.0421186	0.032	0.003	1
AL138831.2	0.0209723	0.0421186	0.032	0.003	1
AL355336.1	0.0209723	0.0421186	0.032	0.003	1
AL024498.1	0.0209723	0.0421186	0.032	0.003	1
AL645939.5	0.0209723	0.0421186	0.032	0.003	1
LINC02569	0.0209723	0.0421186	0.032	0.003	1
EHMT2-AS1	0.0209723	0.0421186	0.032	0.003	1
KIF6	0.0209723	0.0421186	0.032	0.003	1
AL355353.1	0.0209723	0.0421186	0.032	0.003	1
AL135905.1	0.0209723	0.0421186	0.032	0.003	1
TAB2-AS1	0.0209723	0.0421186	0.032	0.003	1
ULBP1	0.0209723	0.0421186	0.032	0.003	1
SYNE1-AS1	0.0209723	0.0421186	0.032	0.003	1
AL049548.1	0.0209723	0.0421186	0.032	0.003	1
AL390955.2	0.0209723	0.0421186	0.032	0.003	1
AL136129.1	0.0209723	0.0421186	0.032	0.003	1
AC005081.1	0.0209723	0.0421186	0.032	0.003	1
LSMEM1	0.0209723	0.0421186	0.032	0.003	1
AC100810.3	0.0209723	0.0421186	0.032	0.003	1
AC069185.1	0.0209723	0.0421186	0.032	0.003	1
AC107373.2	0.0209723	0.0421186	0.032	0.003	1
AC011978.2	0.0209723	0.0421186	0.032	0.003	1
SLCO5A1	0.0209723	0.0421186	0.032	0.003	1
KCNB2	0.0209723	0.0421186	0.032	0.003	1
AC036214.1	0.0209723	0.0421186	0.032	0.003	1
COLEC10	0.0209723	0.0421186	0.032	0.003	1
AC067930.3	0.0209723	0.0421186	0.032	0.003	1
MLANA	0.0209723	0.0421186	0.032	0.003	1
BX664727.3	0.0209723	0.0421186	0.032	0.003	1
BX088651.2	0.0209723	0.0421186	0.032	0.003	1
AL162390.1	0.0209723	0.0421186	0.032	0.003	1
AL137847.2	0.0209723	0.0421186	0.032	0.003	1
SLC25A25-AS1	0.0209723	0.0421186	0.032	0.003	1
LAMC3	0.0209723	0.0421186	0.032	0.003	1
ADAMTSL2	0.0209723	0.0421186	0.032	0.003	1
AL117336.1	0.0209723	0.0421186	0.032	0.003	1
DYDC2	0.0209723	0.0421186	0.032	0.003	1
AL359094.1	0.0209723	0.0421186	0.032	0.003	1
AC011092.3	0.0209723	0.0421186	0.032	0.003	1
AC068205.2	0.0209723	0.0421186	0.032	0.003	1
AGBL2	0.0209723	0.0421186	0.032	0.003	1
AP003119.2	0.0209723	0.0421186	0.032	0.003	1
AP000866.6	0.0209723	0.0421186	0.032	0.003	1
PKNOX2	0.0209723	0.0421186	0.032	0.003	1
AC005414.1	0.0209723	0.0421186	0.032	0.003	1
AC022276.1	0.0209723	0.0421186	0.032	0.003	1
CPNE8-AS1	0.0209723	0.0421186	0.032	0.003	1
HOTAIR	0.0209723	0.0421186	0.032	0.003	1
AC034102.3	0.0209723	0.0421186	0.032	0.003	1
C12orf74	0.0209723	0.0421186	0.032	0.003	1
ANO4	0.0209723	0.0421186	0.032	0.003	1
AC025265.1	0.0209723	0.0421186	0.032	0.003	1
LINC02356	0.0209723	0.0421186	0.032	0.003	1
ATXN2-AS	0.0209723	0.0421186	0.032	0.003	1
AC002070.1	0.0209723	0.0421186	0.032	0.003	1
PSPC1-AS2	0.0209723	0.0421186	0.032	0.003	1
PRMT5-AS1	0.0209723	0.0421186	0.032	0.003	1
AL136295.2	0.0209723	0.0421186	0.032	0.003	1
AL132639.3	0.0209723	0.0421186	0.032	0.003	1
AL627171.1	0.0209723	0.0421186	0.032	0.003	1
AL138995.1	0.0209723	0.0421186	0.032	0.003	1
AL137100.3	0.0209723	0.0421186	0.032	0.003	1
AL359220.1	0.0209723	0.0421186	0.032	0.003	1
AL356805.1	0.0209723	0.0421186	0.032	0.003	1
AL132711.1	0.0209723	0.0421186	0.032	0.003	1
RTL1	0.0209723	0.0421186	0.032	0.003	1
AL132709.7	0.0209723	0.0421186	0.032	0.003	1
AL049840.6	0.0209723	0.0421186	0.032	0.003	1
AC022467.1	0.0209723	0.0421186	0.032	0.003	1
SLC27A2	0.0209723	0.0421186	0.032	0.003	1
MAPK6-DT	0.0209723	0.0421186	0.032	0.003	1
AC023906.4	0.0209723	0.0421186	0.032	0.003	1
AC011939.2	0.0209723	0.0421186	0.032	0.003	1
AL022341.1	0.0209723	0.0421186	0.032	0.003	1
BAIAP3	0.0209723	0.0421186	0.032	0.003	1
CLDN6	0.0209723	0.0421186	0.032	0.003	1
SRL	0.0209723	0.0421186	0.032	0.003	1
AC007014.2	0.0209723	0.0421186	0.032	0.003	1
LINC02129	0.0209723	0.0421186	0.032	0.003	1
SLX1A	0.0209723	0.0421186	0.032	0.003	1
AC099521.3	0.0209723	0.0421186	0.032	0.003	1
DERPC	0.0209723	0.0421186	0.032	0.003	1
ADAP2	0.0209723	0.0421186	0.032	0.003	1
AC002558.2	0.0209723	0.0421186	0.032	0.003	1
AC103702.1	0.0209723	0.0421186	0.032	0.003	1
AC004590.1	0.0209723	0.0421186	0.032	0.003	1
AC011933.3	0.0209723	0.0421186	0.032	0.003	1
LLGL2	0.0209723	0.0421186	0.032	0.003	1
MYO15B	0.0209723	0.0421186	0.032	0.003	1
AC110285.5	0.0209723	0.0421186	0.032	0.003	1
AC110285.2	0.0209723	0.0421186	0.032	0.003	1
LINC01478	0.0209723	0.0421186	0.032	0.003	1
AC015819.2	0.0209723	0.0421186	0.032	0.003	1
AC103808.3	0.0209723	0.0421186	0.032	0.003	1
GNA15	0.0209723	0.0421186	0.032	0.003	1
UNC13A	0.0209723	0.0421186	0.032	0.003	1
SIRPG	0.0209723	0.0421186	0.032	0.003	1
AL121899.3	0.0209723	0.0421186	0.032	0.003	1
RASSF2	0.0209723	0.0421186	0.032	0.003	1
SULF2	0.0209723	0.0421186	0.032	0.003	1
AL133342.1	0.0209723	0.0421186	0.032	0.003	1
AL132655.2	0.0209723	0.0421186	0.032	0.003	1
CR381670.2	0.0209723	0.0421186	0.032	0.003	1
SAMSN1	0.0209723	0.0421186	0.032	0.003	1
RIPPLY3	0.0209723	0.0421186	0.032	0.003	1
CBS	0.0209723	0.0421186	0.032	0.003	1
AP001053.1	0.0209723	0.0421186	0.032	0.003	1
LINC02575	0.0209723	0.0421186	0.032	0.003	1
TSPEAR-AS1	0.0209723	0.0421186	0.032	0.003	1
GAL3ST1	0.0209723	0.0421186	0.032	0.003	1
APOBEC3H	0.0209723	0.0421186	0.032	0.003	1
Z99716.2	0.0209723	0.0421186	0.032	0.003	1
VCX3B	0.0209723	0.0828371	0.032	0.003	1
GRPR	0.0209723	0.0421186	0.032	0.003	1
DGKK	0.0209723	0.0421186	0.032	0.003	1
CITED1	0.0209723	0.0421186	0.032	0.003	1
MAGEE1	0.0209723	0.0421186	0.032	0.003	1
AL035427.1	0.0209723	0.0421186	0.032	0.003	1
AL109946.1	0.0209723	0.0421186	0.032	0.003	1
AL034405.1	0.0209723	0.0421186	0.032	0.003	1
MTREX	0.0210479	0.358359	0.548	0.386	1
MAPK1	0.0210576	-0.358122	0.323	0.512	1
SLC44A1	0.0212455	0.236497	0.516	0.307	1
WNT7A	0.0213326	0.038443	0.032	0.003	1
IDO2	0.0213326	0.038443	0.032	0.003	1
AC104248.1	0.0213326	0.038443	0.032	0.003	1
ANKRD30A	0.0213326	0.038443	0.032	0.003	1
A2M	0.0213326	0.038443	0.032	0.003	1
GPC5	0.0213326	0.0347767	0.032	0.003	1
AC005358.2	0.0213326	0.038443	0.032	0.003	1
MAP3K15	0.0213326	0.038443	0.032	0.003	1
Z83745.1	0.0213326	0.0311196	0.032	0.003	1
NPM3	0.0213791	0.337156	0.613	0.442	1
RPL9	0.0213995	0.124523	1	1	1
TUBA1C	0.0214688	0.408303	0.968	0.977	1
APCDD1L-DT	0.0216085	-0.453857	0.419	0.627	1
FST	0.0217342	0.444429	0.71	0.517	1
FARSB	0.0219052	0.259781	0.581	0.394	1
GTF2F2	0.0219059	-0.391845	0.516	0.637	1
LDOC1	0.0220086	0.232464	0.581	0.361	1
STK10	0.022149	0.286605	0.387	0.212	1
ARV1	0.0222389	-0.298697	0.129	0.32	1
ALKBH4	0.0223227	0.17833	0.29	0.136	1
HLA-A	0.0223988	-0.299815	0.871	0.957	1
PELI2	0.0224211	0.213885	0.226	0.097	1
METTL2B	0.022432	0.216651	0.452	0.253	1
KHDC1	0.0224541	0.197397	0.323	0.161	1
FAM136A	0.0225905	0.290147	0.742	0.581	1
SNRPG	0.0226148	0.244888	1	1	1
GEMIN6	0.0226577	0.297747	0.677	0.517	1
PURB	0.0226605	-0.230123	0.065	0.253	1
ZMYM1	0.0227462	0.332129	0.452	0.281	1
CLBA1	0.0227792	0.129786	0.161	0.056	1
IFT46	0.0228956	0.203809	0.29	0.141	1
RNASEH2A	0.0229324	0.183657	0.194	0.077	1
TRNAU1AP	0.0229553	-0.260479	0.29	0.537	1
BAG1	0.0229925	-0.376595	0.387	0.598	1
ZNF599	0.0230255	0.194038	0.226	0.097	1
MAST2	0.0235845	0.257791	0.484	0.302	1
VPS25	0.0235936	-0.38254	0.645	0.757	1
DUSP23	0.0238744	0.279308	0.548	0.35	1
CTCF	0.024328	0.233617	0.581	0.363	1
BORCS6	0.0244263	0.171402	0.29	0.138	1
PRNP	0.0246492	-0.3516	0.613	0.714	1
CDK19	0.0247223	0.194667	0.452	0.256	1
SLC30A7	0.0248763	-0.223095	0.097	0.292	1
RPL3	0.0249105	0.134539	1	1	1
AC080038.1	0.0249211	0.172795	0.161	0.059	1
AC092957.1	0.0249335	0.154328	0.129	0.041	1
GAS2L3	0.0249646	0.302212	0.323	0.169	1
HOXC6	0.025068	0.150796	0.129	0.041	1
ZUP1	0.0251691	0.168185	0.29	0.138	1
USP32	0.0251891	0.259612	0.548	0.348	1
SYS1	0.025235	0.181744	0.548	0.32	1
PLPP1	0.0253392	-0.322994	0.129	0.322	1
AGAP2-AS1	0.0253466	0.221442	0.355	0.184	1
UBN2	0.0254845	0.139884	0.226	0.095	1
PGAP1	0.0255603	-0.215524	0	0.141	1
LARP1	0.0256193	0.340841	0.645	0.524	1
LPXN	0.0256641	-0.298402	0.323	0.522	1
HEIH	0.0257344	0.197397	0.258	0.12	1
CCDC18-AS1	0.0257833	-0.259051	0.032	0.192	1
MRPL1	0.0257846	0.293678	0.71	0.519	1
FIP1L1	0.0258203	-0.325894	0.258	0.463	1
PHACTR2	0.0261203	-0.261673	0.484	0.67	1
SUCLG1	0.0261907	-0.358301	0.742	0.857	1
ALMS1	0.0262651	0.18496	0.323	0.161	1
SEC31A	0.0264164	-0.390925	0.742	0.847	1
SLC35F1	0.0264325	0.26206	1	0.982	1
CCDC89	0.0265734	0.117227	0.129	0.041	1
FUT4	0.0265734	0.117227	0.129	0.041	1
ALDH4A1	0.0266913	0.160871	0.258	0.118	1
ZFYVE19	0.026963	-0.250062	0.065	0.235	1
CALCOCO1	0.0270923	-0.199644	0.032	0.199	1
PCCB	0.0273604	0.200381	0.387	0.212	1
LIF	0.0273657	-0.360519	0	0.138	1
ZNF680	0.0275084	0.155389	0.29	0.138	1
MSRB3	0.0275196	-0.398573	0.742	0.89	1
AC092919.1	0.0275836	0.0968329	0.097	0.026	1
AC234917.3	0.0275836	0.0968329	0.097	0.026	1
ZNF230	0.0275836	0.0968329	0.097	0.026	1
Z68871.1	0.0275836	0.0968329	0.097	0.026	1
PCMT1	0.027845	0.25015	0.839	0.867	1
TUBB4B	0.0278687	0.373047	1	0.992	1
VAMP5	0.0279021	-0.400064	0.71	0.872	1
CTBP1	0.0280918	0.205793	0.452	0.263	1
CAND2	0.0281339	0.0932396	0.097	0.026	1
MCPH1-AS1	0.0281339	0.0932396	0.097	0.026	1
ARHGAP44	0.0281339	0.0932396	0.097	0.026	1
PPM1B	0.0281441	0.16345	0.355	0.184	1
NBL1	0.0282067	-0.388582	0.323	0.504	1
KLHDC3	0.0282689	0.167023	0.484	0.274	1
ALDH1A3	0.0283113	0.129786	0.161	0.059	1
GPBP1L1	0.0283935	0.233857	0.516	0.315	1
MESP1	0.0285177	0.176836	0.194	0.079	1
VIRMA	0.0285396	0.215161	0.581	0.358	1
ERCC6L	0.0286511	0.184007	0.226	0.1	1
STPG4	0.0286926	0.0896553	0.097	0.026	1
TP53INP1	0.0286926	0.0896553	0.097	0.026	1
CBWD1	0.0287047	-0.193106	0	0.136	1
ZNF737	0.0291222	0.114935	0.065	0.013	1
CENPW	0.029208	0.505887	0.774	0.724	1
DRG2	0.0292319	0.160403	0.548	0.33	1
MSC-AS1	0.0292799	-0.425089	0.323	0.514	1
TFPI	0.0293331	-0.299582	0.419	0.678	1
GULP1	0.0293444	0.268131	0.548	0.363	1
SEC61A2	0.0294052	0.200852	0.161	0.061	1
CENPV	0.0295958	0.248744	0.645	0.437	1
CCSER2	0.0295965	-0.373637	0.258	0.437	1
BOP1	0.0296422	0.304477	0.581	0.407	1
KIF18A	0.0300233	0.179151	0.419	0.22	1
AP001116.1	0.0300571	0.124815	0.194	0.077	1
C5orf15	0.0302499	-0.331565	0.226	0.412	1
PIGC	0.0302674	0.197397	0.387	0.215	1
AL357079.1	0.0304201	0.071866	0.065	0.013	1
RTCA-AS1	0.0304201	0.071866	0.065	0.013	1
AIM2	0.0304201	0.071866	0.065	0.013	1
LINC02112	0.0304201	0.071866	0.065	0.013	1
PCDHB9	0.0304201	0.071866	0.065	0.013	1
POU3F2	0.0304201	0.071866	0.065	0.013	1
LFNG	0.0304201	0.071866	0.065	0.013	1
ZNF79	0.0304201	0.071866	0.065	0.013	1
A2ML1-AS1	0.0304201	0.071866	0.065	0.013	1
MIR17HG	0.0304201	0.071866	0.065	0.013	1
AC005520.2	0.0304201	0.071866	0.065	0.013	1
AL117209.1	0.0304201	0.071866	0.065	0.013	1
MC1R	0.0304201	0.071866	0.065	0.013	1
ZNF382	0.0304201	0.071866	0.065	0.013	1
LIPE	0.0304201	0.071866	0.065	0.013	1
MYO18B	0.0304201	0.071866	0.065	0.013	1
Z93241.1	0.0304201	0.071866	0.065	0.013	1
MED14OS	0.0304201	0.071866	0.065	0.013	1
GAB3	0.0304201	0.071866	0.065	0.013	1
VAPB	0.0305088	0.156135	0.484	0.274	1
ZNF789	0.0305482	-0.19633	0	0.133	1
POMP	0.0305785	0.152208	1	1	1
CD320	0.0309528	0.271461	0.935	0.793	1
AC006480.2	0.030957	0.0682274	0.065	0.013	1
ADAM28	0.030957	0.0609777	0.065	0.013	1
AL049830.3	0.030957	0.0682274	0.065	0.013	1
CFAP161	0.030957	0.0682274	0.065	0.013	1
AC005736.1	0.030957	0.0682274	0.065	0.013	1
C11orf91	0.0309882	0.1513	0.355	0.184	1
FGF7	0.0310051	-0.513097	0.419	0.565	1
EIF5A	0.0310134	0.196934	1	1	1
ARL4A	0.0310611	0.410035	0.548	0.399	1
CDC20	0.0310729	0.490081	0.516	0.34	1
VEPH1	0.0311301	-0.329806	0.516	0.683	1
SNTB2	0.0312131	-0.292188	0.355	0.545	1
WRNIP1	0.0312392	0.206367	0.387	0.22	1
RPL35A	0.0312982	0.13964	1	1	1
COPZ1	0.0313063	0.319104	0.839	0.788	1
HLA-E	0.0313639	-0.317636	0.484	0.66	1
KIAA1143	0.0313889	0.235002	0.548	0.35	1
GABRA3	0.0314124	0.142706	0.29	0.141	1
AAMDC	0.0314276	0.312533	0.871	0.724	1
TXNDC17	0.0314591	0.161418	1	0.997	1
ZNF248	0.0314939	0.158578	0.258	0.12	1
RBM4B	0.031514	0.245895	0.323	0.176	1
PID1	0.0315409	-0.451696	0.387	0.578	1
C2orf69	0.0315428	0.216719	0.258	0.125	1
LIN7C	0.0315776	0.205449	0.516	0.312	1
FAM214B	0.0315793	0.170816	0.387	0.21	1
GALNTL6	0.0315979	0.158578	0.258	0.12	1
MGME1	0.03164	0.142639	0.484	0.271	1
PDSS1	0.0316669	0.203656	0.29	0.146	1
TRNP1	0.0317058	-0.335422	0.097	0.274	1
USP15	0.031838	-0.297368	0.355	0.593	1
TIMP3	0.0318606	-0.832401	0.903	0.931	1
DYNC2H1	0.0319487	-0.263359	0.129	0.317	1
MTMR2	0.0319608	0.255794	0.548	0.353	1
ZWILCH	0.0319815	0.287595	0.355	0.194	1
CHMP7	0.0319956	0.194278	0.323	0.169	1
PHKG2	0.0322736	-0.255396	0.129	0.317	1
APOC1	0.0322852	0.1732	0.355	0.187	1
AFDN	0.032332	0.358703	0.452	0.297	1
NUP50-DT	0.0324248	-0.193106	0	0.13	1
LINC01320	0.0324419	-0.62963	0.677	0.716	1
TOR2A	0.032447	0.156399	0.323	0.164	1
RAP2B	0.0324474	0.153294	0.323	0.164	1
USP11	0.0324559	-0.301136	0.161	0.348	1
LINC00862	0.0325157	0.231424	0.161	0.061	1
ANKRD11	0.0325825	-0.250062	0.871	0.923	1
RAN	0.0326344	0.263334	1	1	1
EIF2B5	0.0327944	0.316655	0.516	0.338	1
AURKB	0.032848	0.432096	0.419	0.269	1
SRSF1	0.0329584	0.28235	0.613	0.404	1
ALG6	0.0329795	0.134963	0.194	0.079	1
POP5	0.0330198	0.333098	0.71	0.629	1
SLFN5	0.0330242	-0.300335	0.258	0.491	1
BROX	0.033093	-0.340797	0.226	0.399	1
C16orf58	0.0331514	0.181867	0.323	0.169	1
FAM153CP	0.0331821	0.194122	0.258	0.125	1
COG8	0.0332839	0.174626	0.258	0.123	1
KIF3C	0.0337455	0.139884	0.226	0.1	1
GNG2	0.0337732	0.12819	0.194	0.079	1
LSM5	0.0340788	0.310238	0.871	0.721	1
MT-ND4L	0.0341667	-0.434898	0.968	0.982	1
MAVS	0.0341909	-0.241794	0.097	0.276	1
COA5	0.0342541	0.1551	0.677	0.425	1
UBE2I	0.0342615	0.317968	0.903	0.898	1
ANP32E	0.0343872	0.424636	0.871	0.744	1
ODF2	0.0345654	0.191448	0.387	0.22	1
SQLE	0.0345696	-0.323241	0.226	0.427	1
ROR2	0.0346581	0.129786	0.161	0.061	1
ZNF140	0.0346581	0.129786	0.161	0.061	1
RBM5	0.034706	0.18039	0.419	0.243	1
POLK	0.0347155	-0.263001	0.161	0.35	1
DPM1	0.0347734	0.232215	0.677	0.478	1
DHX34	0.0349436	-0.234955	0.032	0.179	1
DPP9	0.0349826	0.189223	0.484	0.292	1
DCP1B	0.034987	0.187594	0.258	0.125	1
DPH5	0.0350063	0.185248	0.355	0.192	1
ARL6IP1	0.0350364	0.531991	0.774	0.624	1
PSD3	0.035282	-0.327741	0.323	0.527	1
B3GALNT1	0.0353768	0.113686	0.129	0.043	1
TUBB2A	0.0353974	0.436703	0.677	0.588	1
AL451165.2	0.0354287	0.126314	0.161	0.061	1
TFAP4	0.0354287	0.126314	0.161	0.061	1
ZNF257	0.0354287	0.126314	0.161	0.061	1
VPS72	0.0354723	0.20444	0.645	0.419	1
KLHL22	0.0356103	-0.278917	0.065	0.223	1
KMT2A	0.035817	-0.251911	0.387	0.596	1
ANKIB1	0.0360727	-0.35574	0.452	0.601	1
ZNF329	0.0361024	0.110154	0.129	0.043	1
NCDN	0.0362126	0.12285	0.161	0.061	1
ANKRD42	0.0362126	0.119394	0.161	0.061	1
N6AMT1	0.036218	0.227144	0.452	0.279	1
VIM	0.0362769	0.180893	1	1	1
EEF1E1	0.0362779	0.233954	0.839	0.803	1
RBBP7	0.0363309	0.305754	0.871	0.714	1
PPRC1	0.0363421	0.162631	0.323	0.169	1
RAP2A	0.0365684	0.147815	0.258	0.123	1
MIER2	0.0365783	0.184658	0.29	0.148	1
TMEM191B	0.036621	0.149868	0.226	0.102	1
RFNG	0.0367001	0.167023	0.484	0.284	1
MEIS3	0.0367632	0.206367	0.355	0.199	1
WAC	0.0367748	-0.300467	0.323	0.519	1
C17orf53	0.0368395	0.106631	0.129	0.043	1
PEMT	0.0371015	0.154328	0.516	0.307	1
YJU2	0.0372038	0.19131	0.323	0.171	1
DNAJC9	0.0372275	0.470962	0.581	0.432	1
RNF4	0.0376949	0.229879	0.452	0.279	1
LCMT1	0.0377482	0.302164	0.613	0.43	1
VPS33A	0.0378159	0.16345	0.355	0.192	1
H2AFZ	0.0378356	0.389885	1	0.995	1
MTX1	0.0378953	0.245741	0.839	0.675	1
PIMREG	0.0379013	0.385725	0.323	0.192	1
PDGFRL	0.0379257	0.176203	0.355	0.194	1
ARID3A	0.0379591	0.171402	0.258	0.125	1
PPP1R7	0.0381653	0.232132	0.903	0.829	1
CBLB	0.0383688	-0.307673	0.129	0.304	1
NUDT19	0.038597	0.134963	0.194	0.082	1
RXRB	0.038635	-0.186637	0	0.123	1
MED17	0.0386468	0.147102	0.323	0.166	1
SPHK1	0.0386565	-0.353482	0.581	0.693	1
ITGB5	0.0390477	-0.366427	0.419	0.578	1
MAP3K2-DT	0.0391091	0.174046	0.226	0.105	1
PTPN14	0.0391855	-0.338222	0.613	0.775	1
PGM2L1	0.0393774	0.162378	0.161	0.064	1
GRK6	0.0394195	0.216256	0.452	0.276	1
RAMP2	0.0394432	0.149868	0.194	0.082	1
CNOT1	0.0394489	0.194723	0.516	0.315	1
GOLM1	0.0395115	0.139429	0.581	0.35	1
ING1	0.0395495	0.12845	0.258	0.123	1
THOC7	0.0395891	0.300685	0.903	0.887	1
RIN1	0.0396016	-0.225815	0.032	0.174	1
RPL23A	0.0396314	0.138568	1	1	1
PCGF6	0.0396614	0.150194	0.323	0.169	1
TIMM17B	0.0397112	0.294028	0.839	0.683	1
CYFIP2	0.0397234	0.173437	0.194	0.084	1
ATP2B1	0.0399047	-0.381852	0.613	0.772	1
TUT4	0.0399542	-0.355996	0.29	0.46	1
COPG1	0.0399761	-0.329077	0.355	0.522	1
CDCA5	0.0402223	0.143514	0.355	0.187	1
MAGEA3	0.0402506	0.147815	0.226	0.102	1
MNS1	0.0404092	0.121448	0.194	0.082	1
ID2-AS1	0.0404451	0.0932396	0.097	0.028	1
TMEM171	0.0404451	0.0932396	0.097	0.028	1
DLG5-AS1	0.0404451	0.0932396	0.097	0.028	1
ZNF653	0.0404451	0.0932396	0.097	0.028	1
CEACAM19	0.0404451	0.0932396	0.097	0.028	1
STPG1	0.0405851	0.12845	0.258	0.123	1
LRRC47	0.0406573	0.159512	0.323	0.171	1
PLEKHO1	0.0406729	-0.315691	0.419	0.609	1
ABHD11	0.0407485	0.290335	0.452	0.294	1
LMO7	0.0408799	0.247985	0.903	0.734	1
SHC1	0.0409371	-0.248057	0.355	0.537	1
CRYBB2	0.0409496	0.185248	0.355	0.199	1
RNF103	0.0410692	-0.180138	0	0.12	1
WDR92	0.0412918	0.1732	0.355	0.194	1
BORCS5	0.0412918	0.1732	0.355	0.194	1
EGR1	0.0413059	-0.250062	0.129	0.312	1
CDPF1	0.04134	0.118089	0.194	0.082	1
NKIRAS1	0.0413751	-0.229515	0.065	0.217	1
COX15	0.041499	0.158281	0.387	0.22	1
FAM171B	0.0415576	0.213096	0.29	0.151	1
RTRAF	0.0418738	0.247024	0.968	0.957	1
AL137024.1	0.0419278	0.0860798	0.097	0.028	1
ATXN7L1	0.0419375	0.200381	0.355	0.202	1
TST	0.0423167	-0.285176	0.29	0.509	1
ZNF251	0.0424882	-0.201153	0.032	0.171	1
OCEL1	0.0426525	0.134726	0.355	0.192	1
CCNY	0.042711	-0.277543	0.452	0.619	1
AL135878.1	0.0428057	-0.321798	0.097	0.253	1
TMED7	0.0429797	0.241791	0.677	0.496	1
DCAF6	0.0429966	-0.345267	0.323	0.494	1
CCDC47	0.0431695	-0.305557	0.419	0.627	1
TMCO4	0.0432154	0.147102	0.323	0.169	1
ZHX2	0.043252	0.108059	0.194	0.082	1
RBM39	0.043261	-0.322293	0.806	0.882	1
PODXL	0.0434196	-0.366108	0.258	0.414	1
RPL13A	0.0434199	-0.17361	1	1	1
USF3	0.0434275	0.175177	0.29	0.151	1
ABCB6	0.0434795	-0.163762	0	0.118	1
CTNS	0.0436227	0.143205	0.226	0.105	1
ETV6	0.0436254	-0.37502	0.323	0.478	1
MCFD2	0.0436259	-0.209258	0.871	0.98	1
NEMP2	0.0436508	0.12285	0.161	0.064	1
SIX4	0.0438092	0.138361	0.194	0.084	1
NPR3	0.0438625	-0.291539	0.032	0.169	1
USO1	0.0439053	-0.302698	0.581	0.731	1
KCNH1	0.0439923	0.140253	0.129	0.046	1
MMP16	0.0440328	0.20937	0.323	0.179	1
TAF13	0.0441385	-0.255548	0.129	0.294	1
NGLY1	0.0441931	0.29353	0.484	0.335	1
UBE2R2	0.0442682	-0.329996	0.484	0.662	1
DNAJC22	0.0445405	0.200679	0.226	0.11	1
EIF5B	0.0446399	-0.228036	0.645	0.857	1
SON	0.0447029	-0.322818	0.581	0.711	1
CENPI	0.0447292	0.272165	0.29	0.156	1
RER1	0.0447734	-0.266523	0.968	0.967	1
DVL3	0.0449375	-0.21045	0.032	0.169	1
POLR3A	0.0450518	-0.277284	0.129	0.292	1
DYNC1LI2	0.0450954	-0.341436	0.516	0.627	1
PPCS	0.0452688	-0.31565	0.323	0.494	1
STXBP4	0.0453117	0.181095	0.258	0.13	1
FBXO9	0.0454335	-0.264784	0.387	0.621	1
FZD2	0.045538	0.239989	0.452	0.271	1
MVD	0.0455553	0.146455	0.387	0.217	1
OSBP	0.045668	-0.292461	0.194	0.366	1
DDHD1	0.0457249	0.131737	0.323	0.169	1
PDE7A	0.0457493	0.136572	0.226	0.105	1
POMK	0.0458659	0.110154	0.129	0.046	1
FXN	0.0458683	0.18075	0.452	0.271	1
TAF8	0.0458784	0.229818	0.355	0.205	1
RHOC	0.0459714	0.223243	1	0.985	1
MTMR9	0.0460326	0.155389	0.29	0.151	1
CMIP	0.0463651	-0.310604	0.29	0.465	1
CDK16	0.0463789	0.269257	0.581	0.407	1
DHTKD1	0.0464541	0.177857	0.258	0.13	1
PCID2	0.0465743	0.259393	0.677	0.54	1
PQBP1	0.0465978	-0.197678	0.226	0.417	1
CEP55	0.0466143	0.350283	0.452	0.289	1
CDH24	0.0468426	0.129969	0.226	0.105	1
VDAC3	0.0468837	0.281283	0.871	0.79	1
PRRX1	0.0469494	-0.232989	0.548	0.714	1
IGBP1	0.047039	0.27465	0.645	0.514	1
PTTG1	0.0471062	0.330099	0.871	0.829	1
KMT2D	0.0471428	0.200679	0.226	0.11	1
FEZ2	0.0472652	-0.305632	0.677	0.783	1
ZBTB8OS	0.0472719	-0.306646	0.548	0.678	1
PDE7B	0.0473379	-0.237006	0.097	0.261	1
MYO18A	0.0474024	-0.21045	0.032	0.166	1
TGFBR1	0.0474058	-0.222755	0.032	0.166	1
MANBAL	0.0474707	0.329141	0.71	0.573	1
GTF3C2	0.047762	0.171402	0.258	0.13	1
ATP1B1	0.0477658	0.177359	0.548	0.343	1
ARSE	0.0478699	0.158923	0.161	0.066	1
CKAP5	0.0478761	0.381194	0.645	0.506	1
ITPRIP	0.0479996	-0.19804	0.032	0.166	1
MED25	0.0480233	0.136406	0.29	0.148	1
C9orf16	0.0481541	-0.323815	0.903	0.962	1
HYOU1	0.0481921	-0.29515	0.258	0.453	1
RIPOR1	0.0482269	0.202872	0.452	0.284	1
SRSF10	0.0484995	0.253217	0.806	0.754	1
LINC00467	0.0485302	0.149034	0.29	0.151	1
RPS19	0.0485653	0.10996	1	1	1
EXOG	0.0486638	-0.241292	0.065	0.21	1
INTU	0.0487582	0.165758	0.29	0.153	1
VIPAS39	0.0489347	-0.163762	0	0.113	1
RPF1	0.0490334	0.224791	0.613	0.427	1
KCTD1	0.0490792	-0.180138	0	0.113	1
DENND10	0.0491465	0.243939	0.677	0.476	1
BUD13	0.0492864	-0.232468	0.065	0.21	1
C6orf89	0.0494345	-0.271279	0.323	0.506	1
EI24	0.0494428	0.228799	0.774	0.632	1
TIMM10	0.049446	0.447375	0.774	0.647	1
FAM219B	0.0494915	-0.22359	0.065	0.21	1
ATPAF2	0.0495335	-0.232989	0.097	0.251	1
LRRC49	0.0495372	0.130418	0.355	0.205	1
ME2	0.0496666	0.197397	0.581	0.373	1
NEIL2	0.0499453	0.159922	0.194	0.087	1
ICK	0.0500394	0.165758	0.29	0.153	1
CRYAB	0.0500577	0.221132	0.161	0.066	1
ABI3BP	0.0502853	-0.468523	0.29	0.445	1
NEAT1	0.0503609	-0.387566	0.871	0.923	1
S100A10	0.0503718	0.316074	1	0.992	1
KAT6A	0.0504124	0.166258	0.516	0.32	1
MAP2K5	0.050422	-0.216616	0.032	0.164	1
MBTD1	0.0504228	-0.216616	0.032	0.164	1
HMGA2	0.0505033	-0.472455	0.839	0.903	1
NFIX	0.0506786	-0.341121	0.323	0.491	1
CMAS	0.0507769	0.200764	0.806	0.629	1
FDXR	0.0510611	0.238327	0.484	0.325	1
RRM2	0.0511189	0.353842	0.581	0.419	1
FAM114A2	0.0512712	-0.247231	0.097	0.248	1
MAGEA10	0.0515687	0.235365	0.194	0.087	1
PYGO2	0.0516044	0.134963	0.194	0.087	1
TSEN2	0.0516044	0.134963	0.194	0.087	1
ANXA7	0.0517296	-0.302014	0.613	0.729	1
IMP3	0.0517397	0.175938	0.935	0.749	1
ITGA3	0.0517725	-0.340394	0.548	0.721	1
ARMC6	0.051794	0.224476	0.323	0.182	1
ME3	0.0519074	0.1732	0.355	0.202	1
AC022098.1	0.0519154	-0.160465	0	0.11	1
TMEM150A	0.051942	-0.170335	0	0.11	1
UGCG	0.0520225	-0.320451	0.516	0.642	1
HECTD1	0.0520382	-0.296551	0.516	0.647	1
ZNF580	0.0520477	-0.282253	0.548	0.742	1
PPIA	0.0522525	0.145003	1	1	1
PPP1CA	0.0522756	0.315233	0.839	0.775	1
SYTL2	0.0522902	0.131572	0.161	0.066	1
WDR83	0.0523805	0.184341	0.516	0.332	1
ZNF770	0.0524678	-0.250062	0.161	0.322	1
TAZ	0.0525343	0.162631	0.29	0.153	1
TMEM120A	0.0526212	0.197397	0.355	0.207	1
ODF2L	0.0526902	0.220277	0.516	0.335	1
EPB41	0.0527001	-0.278076	0.097	0.246	1
TMEM41A	0.0527284	0.131572	0.194	0.087	1
ASH1L-AS1	0.0527793	0.131475	0.097	0.031	1
KPNA2	0.052798	0.721477	0.742	0.611	1
SGO2	0.0529148	0.582719	0.419	0.292	1
KLHL17	0.0530295	0.119394	0.161	0.066	1
LINC01776	0.0531623	0.160871	0.226	0.11	1
CDKL1	0.053254	0.229746	0.226	0.113	1
LMNA	0.0533331	0.191409	1	1	1
HSP90AA1	0.0533427	0.246097	1	1	1
CFAP97	0.0533556	-0.265369	0.387	0.581	1
DNAJC2	0.0533876	-0.289772	0.29	0.471	1
FASN	0.053498	0.214238	0.419	0.261	1
BUB1B	0.0537527	0.240972	0.419	0.246	1
GNB1L	0.0537596	0.277656	0.226	0.118	1
CENPA	0.0538016	0.491363	0.387	0.261	1
HAUS2	0.0539494	0.212044	0.355	0.212	1
NEK6	0.0539544	0.264511	0.484	0.327	1
AL360091.3	0.0540007	0.0682274	0.065	0.015	1
AC019080.1	0.0540007	0.0682274	0.065	0.015	1
AC012063.1	0.0540007	0.0682274	0.065	0.015	1
AC122710.1	0.0540007	0.0682274	0.065	0.015	1
AC034236.2	0.0540007	0.0682274	0.065	0.015	1
AL513164.1	0.0540007	0.0682274	0.065	0.015	1
LINC00997	0.0540007	0.0682274	0.065	0.015	1
GPC2	0.0540007	0.0682274	0.065	0.015	1
AC090159.1	0.0540007	0.0682274	0.065	0.015	1
EXPH5	0.0540007	0.0682274	0.065	0.015	1
METTL7B	0.0540007	0.0682274	0.065	0.015	1
MAB21L1	0.0540007	0.0682274	0.065	0.015	1
MESP2	0.0540007	0.0682274	0.065	0.015	1
AC008731.1	0.0540007	0.0682274	0.065	0.015	1
SLC5A11	0.0540007	0.0682274	0.065	0.015	1
AC018695.6	0.0540007	0.0682274	0.065	0.015	1
PIPOX	0.0540007	0.0682274	0.065	0.015	1
SLC52A3	0.0540007	0.0682274	0.065	0.015	1
A1BG-AS1	0.0540376	-0.241292	0.065	0.205	1
TMEM38B	0.0540691	0.212378	0.323	0.184	1
MOAP1	0.0540757	-0.188662	0.032	0.161	1
HDAC6	0.0540976	0.115947	0.161	0.066	1
AGPAT1	0.0541878	-0.316536	0.29	0.445	1
ABCC5	0.0543417	0.145867	0.29	0.153	1
FKBP11	0.0543565	-0.344602	0.871	0.959	1
FGF1	0.0544352	0.29193	0.742	0.609	1
C8orf88	0.05446	0.256649	0.613	0.445	1
NECAP1	0.0544717	0.175702	0.323	0.182	1
RPSA	0.0545964	0.113262	1	1	1
MECR	0.0545988	0.218118	0.484	0.312	1
RARA-AS1	0.0547516	-0.170991	0.065	0.215	1
STAT1	0.0547716	-0.296333	0.323	0.494	1
SDC1	0.0547909	0.388895	0.29	0.179	1
EPB41L4A	0.054818	0.064598	0.065	0.015	1
KCNU1	0.054818	0.064598	0.065	0.015	1
AL356481.1	0.054818	0.0609777	0.065	0.015	1
FUOM	0.054818	0.064598	0.065	0.015	1
PATL2	0.054818	0.0609777	0.065	0.015	1
RASD2	0.054818	0.064598	0.065	0.015	1
CFL1	0.0548601	0.121849	1	1	1
ATXN10	0.055012	-0.267314	0.871	0.967	1
NAPEPLD	0.0550126	-0.153847	0	0.107	1
ZNF234	0.0551162	-0.170335	0	0.107	1
FUBP1	0.0551836	0.264511	0.677	0.496	1
OIP5	0.0551926	0.126679	0.226	0.107	1
BANP	0.0552613	-0.215711	0.065	0.212	1
TBCB	0.0552953	0.239088	0.968	0.951	1
SLC25A21	0.0553736	0.140253	0.129	0.049	1
AC132803.1	0.0554684	0.0658672	0.29	0.146	1
GTF2H5	0.0555224	0.191207	0.903	0.918	1
ADCY4	0.0555962	-0.250062	0.032	0.159	1
SAP30BP	0.0556316	0.251687	0.645	0.478	1
HOXC9	0.0556442	0.0609777	0.065	0.015	1
EIF4EBP1	0.0556466	0.217458	0.968	0.944	1
FAM76A	0.0558412	0.147102	0.323	0.179	1
DPM3	0.0558709	-0.322327	0.613	0.719	1
COL8A1	0.0559733	0.21922	0.839	0.685	1
AC244102.4	0.0560555	0.228967	0.258	0.141	1
ANXA2	0.0561717	0.197909	1	1	1
METTL8	0.0561831	0.134797	0.323	0.176	1
DNAJB12	0.0562032	0.294592	0.581	0.432	1
RAB11FIP5	0.0562038	0.152208	0.29	0.156	1
RAP2C-AS1	0.0562128	0.121448	0.194	0.087	1
GPR160	0.056213	0.118089	0.194	0.087	1
AC011043.1	0.056283	0.105654	0.161	0.066	1
POMT1	0.0563507	0.158923	0.161	0.069	1
AC104806.2	0.0563682	0.0896553	0.097	0.031	1
IFITM1	0.0563682	0.0896553	0.097	0.031	1
PURPL	0.056532	0.103856	0.194	0.087	1
FGF2	0.0565726	-0.458438	1	0.977	1
DAD1	0.0565773	0.178683	1	1	1
SRPRB	0.0565916	-0.250062	0.226	0.404	1
SCNM1	0.056671	0.197397	0.548	0.371	1
PDCD5	0.056748	0.218631	1	1	1
SPCS1	0.0568117	0.171629	0.968	0.992	1
SSBP4	0.0568935	-0.271937	0.387	0.552	1
SLC4A4	0.0572749	-0.19517	0.258	0.437	1
PGRMC1	0.0573043	-0.279356	0.516	0.737	1
AL450384.2	0.0573092	0.0860798	0.097	0.031	1
THNSL1	0.0573092	0.0860798	0.097	0.031	1
SLITRK4	0.0573092	0.0860798	0.097	0.031	1
CNTRL	0.0573736	0.249653	0.29	0.166	1
RPS27A	0.0573859	0.0831569	1	1	1
UACA	0.0574219	-0.318487	0.613	0.716	1
AQR	0.0575295	0.226841	0.516	0.35	1
EMILIN1	0.0575309	-0.269887	0.419	0.606	1
PDS5B	0.0575369	0.0847129	0.516	0.309	1
REEP4	0.057723	0.162064	0.355	0.202	1
PGLS	0.0577299	-0.268992	0.968	0.949	1
TSR3	0.0577617	-0.258283	0.645	0.785	1
FBXO17	0.0579293	0.301624	0.516	0.407	1
CYB561D2	0.0580698	-0.279529	0.258	0.44	1
NBEAL2	0.0581091	0.106631	0.129	0.049	1
LINC00294	0.0581091	0.106631	0.129	0.049	1
DZIP1	0.058119	0.137649	0.387	0.223	1
C6orf47	0.0581735	0.233021	0.226	0.115	1
TP53RK	0.0582587	-0.268758	0.323	0.509	1
AC009126.1	0.0582617	0.0825132	0.097	0.031	1
NUBP1	0.0583712	0.210572	0.484	0.317	1
CAPN5	0.0583751	-0.160465	0	0.105	1
SEC24A	0.0584195	-0.290704	0.129	0.276	1
AL354740.1	0.0584466	-0.17361	0	0.105	1
HAUS1	0.0586098	0.284595	0.581	0.453	1
IRAK3	0.0586557	0.17203	0.29	0.159	1
SORBS3	0.0586626	-0.291285	0.355	0.535	1
IL15	0.0588722	0.136121	0.387	0.223	1
CCHCR1	0.0589123	0.144016	0.323	0.179	1
LAYN	0.0589692	-0.273909	0.387	0.54	1
BRD4	0.0591152	0.377232	0.677	0.581	1
EXOC8	0.0591645	0.103117	0.129	0.049	1
DLG2	0.0591645	0.099611	0.129	0.049	1
AL161772.1	0.0591645	0.103117	0.129	0.049	1
RNF213-AS1	0.0591645	0.103117	0.129	0.049	1
SLC39A1	0.0592876	0.301689	0.677	0.542	1
SGPP1	0.0593116	0.194278	0.29	0.161	1
URI1	0.0593276	-0.228367	0.581	0.724	1
TNIP2	0.0593959	0.217543	0.613	0.437	1
VGLL4	0.0593981	-0.276938	0.226	0.389	1
AC008915.2	0.05957	0.122597	0.323	0.174	1
UBE2C	0.0596574	1.08952	0.516	0.412	1
RAB5B	0.0597723	-0.258283	0.129	0.279	1
MAPRE2	0.0597825	-0.236256	0.097	0.251	1
ZNF724	0.0602341	0.099611	0.129	0.049	1
SMIM20	0.0604329	0.242426	0.742	0.568	1
KRBOX4	0.060616	-0.188662	0.032	0.156	1
NRGN	0.0606571	0.183799	0.452	0.289	1
RAD51	0.0606787	0.152208	0.258	0.133	1
SMC6	0.0608303	-0.262553	0.323	0.491	1
GADD45GIP1	0.0608689	0.197397	1	1	1
NOB1	0.060882	0.140522	0.581	0.379	1
MMD	0.0609014	0.200523	0.29	0.164	1
ARMC9	0.060959	-0.41398	0.29	0.437	1
CC2D2A	0.0612445	0.139253	0.355	0.202	1
SDSL	0.0612452	0.133267	0.355	0.202	1
MIS18A	0.061299	0.243526	0.452	0.284	1
CHST12	0.0613258	0.199741	0.581	0.404	1
CRYL1	0.0613612	-0.298561	0.258	0.404	1
ZNF883	0.0615321	0.12819	0.194	0.09	1
ARHGAP22	0.0616402	-0.326683	0.548	0.701	1
NCOA6	0.06173	0.140253	0.419	0.251	1
2023-03-02	0.0617535	0.215876	0.484	0.302	1
GBA2	0.0617908	-0.143863	0	0.102	1
CLCN7	0.0617908	-0.143863	0	0.102	1
ACVR2A	0.061849	-0.150526	0	0.102	1
TCAF1	0.0621112	0.130542	0.484	0.294	1
WBP1	0.0621333	-0.250062	0.194	0.358	1
ABCB7	0.0623292	-0.211667	0.065	0.199	1
NPR2	0.062399	0.119394	0.161	0.069	1
RNF6	0.06271	0.18905	0.419	0.269	1
GMEB2	0.0628166	0.124815	0.194	0.09	1
TLNRD1	0.0628727	0.216256	0.258	0.143	1
ORAI2	0.0629648	-0.2894	0.258	0.422	1
USPL1	0.0630469	0.203371	0.355	0.217	1
MVB12A	0.063061	0.236391	0.71	0.606	1
FLII	0.0630735	0.25473	0.613	0.442	1
GRK4	0.0631203	-0.202659	0.065	0.199	1
OSBPL11	0.0631209	-0.205668	0.065	0.199	1
PAICS	0.0632318	0.361516	0.742	0.678	1
PYCR3	0.0633349	0.163289	0.194	0.092	1
TOMM5	0.0635853	0.164814	0.968	0.982	1
SSH3	0.0636057	0.115947	0.161	0.069	1
EPHA2	0.0636316	-0.324063	0.226	0.371	1
KIAA0586	0.0637005	0.194723	0.452	0.284	1
ENO2	0.0637092	0.199874	0.516	0.35	1
KTI12	0.0638282	-0.201153	0.129	0.289	1
ZNF688	0.0639615	0.162631	0.29	0.161	1
LDHA	0.0640189	0.176258	1	1	1
TUBB	0.0641227	0.289019	1	0.997	1
RWDD4	0.064413	-0.26568	0.387	0.552	1
AL691420.1	0.0645326	0.0974011	0.226	0.11	1
DGKE	0.0645683	-0.176062	0.032	0.153	1
EIF2AK3	0.0647045	-0.179222	0.032	0.153	1
RAB11B	0.0648206	0.28691	0.613	0.524	1
VIM-AS1	0.0648297	0.112508	0.161	0.069	1
FRG1	0.0648356	-0.273909	0.355	0.555	1
COQ5	0.0650163	0.140936	0.323	0.182	1
MAN1B1	0.0651354	-0.242449	0.194	0.355	1
NTMT1	0.0651619	0.262006	0.935	0.893	1
ARHGAP26	0.0652134	-0.238357	0.065	0.197	1
SV2A	0.0653634	-0.250062	0.161	0.312	1
SBNO2	0.0653874	-0.162256	0.065	0.215	1
COX5A	0.0654325	0.195626	0.968	0.997	1
FBXL8	0.0654463	0.118089	0.194	0.09	1
CLK2	0.0656305	-0.167052	0	0.1	1
LSM3	0.0656605	0.260133	0.871	0.859	1
DPP7	0.0660113	0.218155	0.71	0.56	1
NTAN1	0.0661038	0.222089	0.806	0.619	1
SMARCD3	0.0661736	0.149868	0.194	0.092	1
TFB1M	0.0661873	0.256383	0.581	0.419	1
EIF4G3	0.066221	-0.278233	0.71	0.77	1
KDM1A	0.0664056	-0.324651	0.452	0.586	1
PRCP	0.0664291	0.235735	0.516	0.353	1
ZFX	0.0664293	0.204702	0.581	0.399	1
FBXO34	0.0664927	0.26305	0.355	0.22	1
TOLLIP	0.0664969	0.164975	0.387	0.235	1
CTNNAL1	0.0665465	-0.311138	0.742	0.79	1
PWWP3A	0.0665682	0.2212	0.452	0.302	1
ARHGEF1	0.0666177	-0.260709	0.161	0.309	1
HSPB11	0.0666804	0.167542	0.903	0.785	1
MXD3	0.0669165	0.326601	0.323	0.194	1
ENOPH1	0.0669214	0.208602	0.419	0.266	1
RPL26	0.0669309	0.0979879	1	1	1
SAR1A	0.0670238	0.32544	0.645	0.57	1
BBS7	0.0670347	-0.28373	0.452	0.583	1
ZNF185	0.067115	0.289352	0.452	0.312	1
PRRX2	0.0671408	0.211724	0.323	0.182	1
ZNF48	0.0672968	0.153212	0.194	0.092	1
BAX	0.067379	0.237661	0.968	0.982	1
SEPTIN1	0.0673974	0.136406	0.29	0.159	1
LINC01411	0.0675201	-0.543109	0.129	0.274	1
ABTB1	0.0675705	-0.194921	0.032	0.151	1
SMARCA2	0.0675807	0.208143	0.452	0.294	1
PPIE	0.0676053	0.276184	0.613	0.506	1
UBL7-AS1	0.0676237	0.215815	0.29	0.169	1
GLA	0.067667	0.189549	0.484	0.317	1
MZT2B	0.0676841	-0.161759	1	0.995	1
ZCCHC7	0.0677445	-0.262553	0.29	0.46	1
LYPLAL1-AS1	0.067771	0.161418	0.097	0.033	1
CAMLG	0.067866	-0.285308	0.71	0.749	1
KNL1	0.0679449	0.219423	0.419	0.266	1
RALY	0.0679775	-0.307586	0.581	0.703	1
IFITM3	0.0679963	-0.220409	1	0.995	1
DDX31	0.0680287	-0.182375	0.032	0.151	1
FADS2	0.0680301	-0.188662	0.032	0.151	1
ITCH	0.068046	-0.305103	0.387	0.55	1
EIF5A2	0.0680704	0.175244	0.419	0.266	1
VKORC1L1	0.0683807	0.181654	0.613	0.435	1
MDC1	0.0683923	-0.134828	0.032	0.159	1
ARHGAP18	0.0685543	-0.275035	0.645	0.824	1
C1S	0.0687802	0.123396	0.226	0.113	1
TBC1D17	0.0687803	0.120121	0.226	0.113	1
SREK1IP1	0.0688683	-0.286752	0.355	0.504	1
FBXL6	0.0689649	0.255173	0.29	0.171	1
WDR62	0.0690112	0.287595	0.194	0.1	1
UBE2S	0.0690119	0.350789	1	0.995	1
ENTPD3-AS1	0.0694182	-0.137168	0	0.097	1
ZNF200	0.0694483	-0.140519	0	0.097	1
YBX1	0.0694523	0.123649	1	1	1
EXO1	0.0696601	-0.180138	0	0.097	1
HS2ST1	0.0696634	0.133267	0.387	0.228	1
CUL3	0.0698919	-0.307673	0.452	0.596	1
DLST	0.0701196	0.178396	0.452	0.297	1
PDCD10	0.0701246	-0.192079	0.645	0.752	1
CSF2	0.0710747	0.27077	0.129	0.051	1
HMGA1	0.0712086	0.213527	1	0.997	1
C7orf25	0.071238	0.124815	0.194	0.092	1
CTDP1	0.071238	0.114738	0.194	0.092	1
NDUFV1	0.0714094	0.194122	0.839	0.675	1
ZNF639	0.0715515	0.131737	0.323	0.184	1
LAMTOR5	0.0717176	0.185279	1	0.98	1
RPL29	0.0720664	0.100503	1	1	1
FRAT2	0.0721464	0.103117	0.129	0.051	1
OXR1	0.0723089	-0.233942	0.226	0.417	1
PDIA5	0.0724386	0.169916	0.516	0.335	1
RPS24	0.0725205	0.117481	1	1	1
SYNGR2	0.0726713	0.121448	0.194	0.092	1
RPP38	0.0727259	0.16765	0.452	0.294	1
CD81	0.0727347	0.221511	1	1	1
ABRACL	0.072737	-0.340517	0.71	0.77	1
ACYP1	0.0729265	0.173909	0.774	0.596	1
PAM	0.0732627	-0.261826	0.484	0.634	1
RGS2	0.0733827	0.099611	0.129	0.051	1
SHLD3	0.0733827	0.099611	0.129	0.051	1
ERV3-1	0.0733827	0.099611	0.129	0.051	1
RHEBL1	0.0733827	0.099611	0.129	0.051	1
C22orf15	0.0733827	0.099611	0.129	0.051	1
MCAT	0.073488	-0.20867	0.065	0.192	1
PIGO	0.0735386	-0.130442	0	0.095	1
GPT2	0.0735705	-0.133809	0	0.095	1
NXPH4	0.073629	-0.140519	0	0.095	1
TRIP12	0.0736325	-0.199375	0.355	0.606	1
NIPA1	0.0736559	-0.147198	0	0.095	1
ZNF367	0.0737035	-0.150526	0	0.095	1
EEF1A1	0.0737756	0.111468	1	1	1
TRAM2	0.0738044	-0.343172	0.355	0.478	1
RAB22A	0.0739605	0.0815162	0.613	0.389	1
PRPSAP1	0.0740863	0.195137	0.581	0.427	1
ERMAP	0.0741262	0.114738	0.194	0.092	1
SHKBP1	0.0741858	0.208368	0.645	0.46	1
CXCL12	0.0742268	-0.447819	0.323	0.486	1
C12orf10	0.0743321	-0.301592	0.677	0.742	1
SFT2D2	0.0744614	0.153364	0.387	0.238	1
GIGYF2	0.0746498	-0.252246	0.29	0.473	1
ATG4A	0.074672	0.136406	0.29	0.161	1
MYO9A	0.0747056	-0.261203	0.258	0.442	1
PGM2	0.0748551	-0.318013	0.452	0.558	1
RPL7	0.0750405	0.19051	1	1	1
USP14	0.0750577	0.330254	0.806	0.685	1
ERCC4	0.0751371	-0.228529	0.161	0.307	1
PPP1CC	0.0753738	0.264511	0.71	0.573	1
BOK-AS1	0.0753747	0.0860798	0.097	0.033	1
FAM86B1	0.0753747	0.0860798	0.097	0.033	1
PXDNL	0.0753747	0.0860798	0.097	0.033	1
MIGA2	0.0753747	0.0860798	0.097	0.033	1
RBM38	0.0753747	0.0860798	0.097	0.033	1
LINC01547	0.0753747	0.0860798	0.097	0.033	1
AC245452.1	0.0753747	0.0860798	0.097	0.033	1
INSIG2	0.0753838	-0.190561	0.065	0.192	1
MYH10	0.075491	0.143057	0.387	0.23	1
CACUL1	0.0754938	-0.241794	0.129	0.269	1
MRPL37	0.0756478	0.284536	0.677	0.581	1
GTF2B	0.0756869	-0.298402	0.387	0.519	1
CORO1A	0.0757418	0.216256	0.258	0.143	1
TEC	0.0759016	0.0926245	0.129	0.051	1
POLR2G	0.0759181	0.161663	0.645	0.453	1
H1F0	0.0760962	0.108832	0.613	0.396	1
NID2	0.0761349	-0.238357	0.065	0.189	1
SOS1	0.0761463	-0.115012	0.258	0.463	1
SH3BP5	0.0762883	-0.179222	0.032	0.146	1
PUS1	0.0764689	0.130134	0.29	0.161	1
PPP1R15A	0.0764811	-0.291946	0.226	0.414	1
CFLAR	0.0764904	-0.310604	0.29	0.437	1
HELLPAR	0.0765336	0.0825132	0.097	0.033	1
SOCS1	0.0765967	0.197397	0.29	0.169	1
MEIS1	0.0767514	-0.394028	0.452	0.565	1
PIDD1	0.076797	0.109077	0.161	0.072	1
SNX16	0.0768044	-0.172894	0.032	0.146	1
CHPF2	0.0768353	-0.20786	0.161	0.317	1
SF3B5	0.0768715	0.171557	0.968	0.982	1
INCENP	0.0768837	0.108392	0.258	0.136	1
S100A2	0.076965	0.365979	0.516	0.348	1
WDTC1	0.0769727	-0.166539	0.032	0.146	1
RMND1	0.0770167	0.13898	0.387	0.235	1
ERBB4	0.0771797	0.207788	0.129	0.054	1
SPATA6	0.0773055	-0.160155	0.032	0.146	1
L3MBTL2	0.0773056	-0.16335	0.032	0.146	1
ANXA3	0.0774123	0.207521	0.161	0.074	1
HIST1H3D	0.0775722	0.0925396	0.29	0.156	1
BCL2A1	0.0777051	0.0789554	0.097	0.033	1
CLCN5	0.0777051	0.0789554	0.097	0.033	1
BRAT1	0.0777363	0.144016	0.29	0.164	1
KRT7	0.0778516	0.198855	0.742	0.606	1
NUDC	0.0779648	0.25263	0.968	0.957	1
NHEJ1	0.077967	-0.130442	0	0.092	1
TRPM4	0.0779972	-0.137168	0	0.092	1
ATP8B2	0.0780255	-0.137168	0	0.092	1
SRD5A1	0.0780256	-0.140519	0	0.092	1
CALML4	0.0780256	-0.140519	0	0.092	1
ADAMTSL4-AS1	0.0780524	-0.150526	0	0.092	1
AC007422.1	0.0780766	-0.143863	0	0.092	1
CAMK2D	0.0781534	0.226841	0.484	0.327	1
MTA3	0.0781829	0.229931	0.484	0.355	1
POLL	0.0782035	0.10224	0.161	0.072	1
TRIR	0.0782275	0.151794	0.968	0.987	1
NFATC4	0.0782383	0.125247	0.258	0.138	1
CENPF	0.0782726	0.747193	0.484	0.384	1
SOS2	0.0783182	-0.24746	0.161	0.312	1
GOLGA1	0.0783496	0.237876	0.355	0.228	1
SPSB3	0.078373	0.248521	0.355	0.223	1
ILK	0.0785252	0.185424	0.903	0.857	1
SCLY	0.0785296	0.134797	0.323	0.187	1
ZFHX3	0.0787281	0.272973	0.484	0.345	1
PAWR	0.0788788	-0.213147	0.71	0.854	1
AGTR1	0.0788903	0.149034	0.258	0.141	1
SLU7	0.0789221	0.155251	0.452	0.292	1
MCAM	0.0791043	0.137864	0.29	0.161	1
NFU1	0.0792125	0.239914	0.742	0.601	1
TOP1	0.0792836	-0.178871	0.774	0.862	1
SDCBP	0.0794814	-0.302345	0.484	0.606	1
RNF214	0.0795546	-0.272664	0.226	0.366	1
ENTPD4	0.0795816	-0.196882	0.097	0.238	1
PABPC4	0.0797609	0.305973	0.71	0.596	1
PSMA4	0.0797971	0.246399	0.903	0.934	1
CCDC25	0.0799069	0.226648	0.742	0.621	1
KRT15	0.0799193	0.246196	0.194	0.1	1
TINF2	0.0799436	0.136961	0.581	0.381	1
CYCS	0.0800043	0.230037	0.968	0.949	1
KCTD12	0.0800865	0.071866	0.097	0.033	1
COX7C	0.0804601	0.130441	1	1	1
DDX41	0.0805347	0.176203	0.323	0.194	1
KIF20B	0.0806903	0.352554	0.484	0.358	1
CCNQ	0.080714	0.225411	0.452	0.32	1
ARHGAP10	0.0807381	-0.360172	0.581	0.655	1
PARP14	0.080766	0.0883541	0.419	0.248	1
AC103706.1	0.0809106	0.107667	0.065	0.018	1
RUVBL2	0.0809862	0.275834	0.645	0.499	1
HMMR	0.0810045	0.427784	0.452	0.327	1
TEK	0.081073	0.0954345	0.161	0.072	1
ARFGAP1	0.0811518	-0.172222	0.065	0.189	1
MFSD14A	0.0812781	0.220904	0.323	0.202	1
ELOC	0.0815309	0.212408	1	0.987	1
AMZ2	0.0816297	-0.231238	0.161	0.302	1
ATG3	0.0816672	-0.211843	0.419	0.578	1
COX11	0.0819607	0.109147	0.548	0.348	1
ZC2HC1C	0.0819849	0.104046	0.065	0.018	1
UBA6	0.082055	-0.255709	0.419	0.586	1
ALKBH8	0.0821205	-0.156953	0.032	0.143	1
ZBTB45	0.0822723	0.136756	0.129	0.054	1
PIBF1	0.0823246	-0.284009	0.29	0.44	1
KPNB1	0.0824304	0.200822	0.839	0.777	1
ANKDD1A	0.0826227	-0.127067	0	0.09	1
HDX	0.0826343	0.142706	0.258	0.141	1
CAMKK1	0.0826528	-0.130442	0	0.09	1
RBM7	0.0828983	0.146394	0.484	0.315	1
ARL3	0.0830215	0.215959	0.968	0.926	1
PDLIM3	0.0831489	0.202174	0.548	0.391	1
STYXL1	0.0832669	0.11626	0.419	0.256	1
TECPR1	0.0834558	0.118089	0.194	0.095	1
RESF1	0.0834558	0.118089	0.194	0.095	1
ADNP	0.0835366	-0.255115	0.226	0.366	1
SPOCK3	0.0836142	0.0968329	0.065	0.018	1
CUTA	0.0837537	0.157832	1	1	1
COPS6	0.0837921	0.164738	0.935	0.91	1
GCNT1	0.0838099	0.248521	0.355	0.217	1
RAB27A	0.0838175	-0.250062	0.161	0.307	1
XPA	0.0839027	0.1484	0.516	0.353	1
CHD2	0.0840437	-0.257675	0.548	0.693	1
MBLAC2	0.0841078	0.183657	0.161	0.077	1
VPS36	0.0841489	0.213885	0.548	0.402	1
CLIP2	0.0842262	0.207928	0.452	0.299	1
MYO1E	0.0843997	-0.33956	0.452	0.57	1
TEX30	0.0845945	0.183657	0.548	0.402	1
LINC01134	0.0846786	0.038443	0.032	0.005	1
E2F2	0.0846786	0.038443	0.032	0.005	1
AL451070.1	0.0846786	0.038443	0.032	0.005	1
FOXO6	0.0846786	0.038443	0.032	0.005	1
AL606760.2	0.0846786	0.038443	0.032	0.005	1
ROR1-AS1	0.0846786	0.038443	0.032	0.005	1
AL360219.1	0.0846786	0.038443	0.032	0.005	1
AC239868.1	0.0846786	0.038443	0.032	0.005	1
AL590666.2	0.0846786	0.038443	0.032	0.005	1
MYOCOS	0.0846786	0.038443	0.032	0.005	1
C4BPB	0.0846786	0.038443	0.032	0.005	1
LINC02767	0.0846786	0.038443	0.032	0.005	1
WNT9A	0.0846786	0.038443	0.032	0.005	1
LINC01804	0.0846786	0.038443	0.032	0.005	1
DNAH6	0.0846786	0.038443	0.032	0.005	1
AC009505.1	0.0846786	0.038443	0.032	0.005	1
AC092625.1	0.0846786	0.038443	0.032	0.005	1
PJVK	0.0846786	0.038443	0.032	0.005	1
AC067956.1	0.0846786	0.038443	0.032	0.005	1
LINC02084	0.0846786	0.038443	0.032	0.005	1
PTH1R	0.0846786	0.038443	0.032	0.005	1
CELSR3	0.0846786	0.038443	0.032	0.005	1
ESYT3	0.0846786	0.038443	0.032	0.005	1
LINC01391	0.0846786	0.038443	0.032	0.005	1
AC108667.2	0.0846786	0.038443	0.032	0.005	1
SOX2-OT	0.0846786	0.038443	0.032	0.005	1
LAMP3	0.0846786	0.038443	0.032	0.005	1
SLC51A	0.0846786	0.038443	0.032	0.005	1
AC068620.1	0.0846786	0.038443	0.032	0.005	1
FRAS1	0.0846786	0.038443	0.032	0.005	1
AC131944.1	0.0846786	0.038443	0.032	0.005	1
AC034159.2	0.0846786	0.038443	0.032	0.005	1
LINC02362	0.0846786	0.038443	0.032	0.005	1
CTNND2	0.0846786	0.038443	0.032	0.005	1
AC025171.3	0.0846786	0.038443	0.032	0.005	1
MEF2C-AS2	0.0846786	0.038443	0.032	0.005	1
AC093510.1	0.0846786	0.038443	0.032	0.005	1
FAM153B	0.0846786	0.038443	0.032	0.005	1
AC008610.1	0.0846786	0.038443	0.032	0.005	1
AC008443.3	0.0846786	0.038443	0.032	0.005	1
HIST1H2BA	0.0846786	0.038443	0.032	0.005	1
MDFI	0.0846786	0.038443	0.032	0.005	1
AL355385.1	0.0846786	0.038443	0.032	0.005	1
CRISP2	0.0846786	0.038443	0.032	0.005	1
AL024508.2	0.0846786	0.038443	0.032	0.005	1
IL20RA	0.0846786	0.038443	0.032	0.005	1
AL023581.2	0.0846786	0.038443	0.032	0.005	1
AL023806.1	0.0846786	0.038443	0.032	0.005	1
SLC29A4	0.0846786	0.038443	0.032	0.005	1
CALN1	0.0846786	0.038443	0.032	0.005	1
TMEM270	0.0846786	0.038443	0.032	0.005	1
NYAP1	0.0846786	0.038443	0.032	0.005	1
FEZF1-AS1	0.0846786	0.038443	0.032	0.005	1
FLNC-AS1	0.0846786	0.038443	0.032	0.005	1
FGF20	0.0846786	0.038443	0.032	0.005	1
PIWIL2	0.0846786	0.038443	0.032	0.005	1
RNF122	0.0846786	0.038443	0.032	0.005	1
AC084024.4	0.0846786	0.038443	0.032	0.005	1
CLVS1	0.0846786	0.038443	0.032	0.005	1
AC091173.1	0.0846786	0.038443	0.032	0.005	1
LINC02842	0.0846786	0.038443	0.032	0.005	1
MCMDC2	0.0846786	0.038443	0.032	0.005	1
PCAT1	0.0846786	0.038443	0.032	0.005	1
KCNV2	0.0846786	0.038443	0.032	0.005	1
AL162386.2	0.0846786	0.038443	0.032	0.005	1
AL445623.2	0.0846786	0.038443	0.032	0.005	1
IFT74-AS1	0.0846786	0.038443	0.032	0.005	1
UBE2R2-AS1	0.0846786	0.038443	0.032	0.005	1
PAX5	0.0846786	0.038443	0.032	0.005	1
LINC01474	0.0846786	0.038443	0.032	0.005	1
AC007066.2	0.0846786	0.038443	0.032	0.005	1
AC010997.5	0.0846786	0.038443	0.032	0.005	1
LINC01374	0.0846786	0.038443	0.032	0.005	1
ACSL5	0.0846786	0.038443	0.032	0.005	1
AL158835.1	0.0846786	0.038443	0.032	0.005	1
IFITM10	0.0846786	0.038443	0.032	0.005	1
AC021269.3	0.0846786	0.038443	0.032	0.005	1
PRDM11	0.0846786	0.038443	0.032	0.005	1
OR8A1	0.0846786	0.038443	0.032	0.005	1
PLBD1	0.0846786	0.038443	0.032	0.005	1
AC024145.1	0.0846786	0.038443	0.032	0.005	1
AC079950.1	0.0846786	0.038443	0.032	0.005	1
SMAD9-IT1	0.0846786	0.038443	0.032	0.005	1
AL590064.1	0.0846786	0.038443	0.032	0.005	1
ATP7B	0.0846786	0.038443	0.032	0.005	1
AL359436.1	0.0846786	0.038443	0.032	0.005	1
AL109628.2	0.0846786	0.038443	0.032	0.005	1
ATL1	0.0846786	0.038443	0.032	0.005	1
AL139021.2	0.0846786	0.038443	0.032	0.005	1
HIF1A-AS1	0.0846786	0.038443	0.032	0.005	1
PLEKHH1	0.0846786	0.038443	0.032	0.005	1
AC004974.1	0.0846786	0.038443	0.032	0.005	1
AL117190.2	0.0846786	0.038443	0.032	0.005	1
GCNT3	0.0846786	0.038443	0.032	0.005	1
RORA-AS1	0.0846786	0.038443	0.032	0.005	1
NRG4	0.0846786	0.038443	0.032	0.005	1
AC103739.2	0.0846786	0.038443	0.032	0.005	1
PRC1-AS1	0.0846786	0.038443	0.032	0.005	1
ADAMTS17	0.0846786	0.038443	0.032	0.005	1
AC005363.2	0.0846786	0.038443	0.032	0.005	1
AC093525.6	0.0846786	0.038443	0.032	0.005	1
AC008551.1	0.0846786	0.038443	0.032	0.005	1
ITGAL	0.0846786	0.038443	0.032	0.005	1
AC138305.1	0.0846786	0.038443	0.032	0.005	1
ADAMTS18	0.0846786	0.038443	0.032	0.005	1
HSD17B2	0.0846786	0.038443	0.032	0.005	1
SNAI3	0.0846786	0.038443	0.032	0.005	1
AC090617.10	0.0846786	0.038443	0.032	0.005	1
MIR497HG	0.0846786	0.038443	0.032	0.005	1
ALOX15B	0.0846786	0.038443	0.032	0.005	1
CFAP52	0.0846786	0.038443	0.032	0.005	1
LINC02087	0.0846786	0.038443	0.032	0.005	1
RSKR	0.0846786	0.038443	0.032	0.005	1
AC024619.3	0.0846786	0.038443	0.032	0.005	1
AC079915.1	0.0846786	0.038443	0.032	0.005	1
AC060766.4	0.0846786	0.038443	0.032	0.005	1
AC103703.1	0.0846786	0.038443	0.032	0.005	1
NXPH3	0.0846786	0.038443	0.032	0.005	1
AC034268.2	0.0846786	0.038443	0.032	0.005	1
AC004687.1	0.0846786	0.038443	0.032	0.005	1
AC145343.1	0.0846786	0.038443	0.032	0.005	1
AP001269.4	0.0846786	0.038443	0.032	0.005	1
ZNF556	0.0846786	0.038443	0.032	0.005	1
CATSPERD	0.0846786	0.038443	0.032	0.005	1
OLFM2	0.0846786	0.038443	0.032	0.005	1
CERS1	0.0846786	0.038443	0.032	0.005	1
WDR88	0.0846786	0.038443	0.032	0.005	1
PPP1R14A	0.0846786	0.038443	0.032	0.005	1
HIPK4	0.0846786	0.038443	0.032	0.005	1
LMTK3	0.0846786	0.038443	0.032	0.005	1
AC011468.5	0.0846786	0.038443	0.032	0.005	1
ZNF534	0.0846786	0.038443	0.032	0.005	1
EDDM13	0.0846786	0.038443	0.032	0.005	1
AC005498.2	0.0846786	0.038443	0.032	0.005	1
AC003005.2	0.0846786	0.038443	0.032	0.005	1
PTGIS	0.0846786	0.038443	0.032	0.005	1
AL354993.2	0.0846786	0.038443	0.032	0.005	1
BX640514.2	0.0846786	0.038443	0.032	0.005	1
AP000459.2	0.0846786	0.038443	0.032	0.005	1
PNPLA4	0.0846786	0.038443	0.032	0.005	1
ZNF157	0.0846786	0.038443	0.032	0.005	1
TRO	0.0846786	0.038443	0.032	0.005	1
AC004556.3	0.0846786	0.038443	0.032	0.005	1
DCLRE1B	0.0846954	0.064598	0.065	0.018	1
AC104134.1	0.0846954	0.064598	0.065	0.018	1
AC064836.3	0.0846954	0.064598	0.065	0.018	1
LINC02434	0.0846954	0.064598	0.065	0.018	1
ZNF391	0.0846954	0.064598	0.065	0.018	1
AC144652.1	0.0846954	0.064598	0.065	0.018	1
NUDT13	0.0846954	0.064598	0.065	0.018	1
AGAP5	0.0846954	0.064598	0.065	0.018	1
LINC00641	0.0846954	0.064598	0.065	0.018	1
AC133552.5	0.0846954	0.064598	0.065	0.018	1
AC093512.2	0.0846954	0.064598	0.065	0.018	1
TTC25	0.0846954	0.064598	0.065	0.018	1
AC006213.3	0.0846954	0.064598	0.065	0.018	1
ZNF211	0.0846954	0.064598	0.065	0.018	1
PTPRF	0.0847065	0.163788	0.548	0.373	1
ITM2C	0.0848824	0.192456	0.516	0.343	1
TADA3	0.0848845	-0.0897568	0.613	0.737	1
PRELID1	0.0848871	0.104205	1	1	1
TMEM250	0.0850048	0.162631	0.29	0.169	1
INTS2	0.0850667	0.114738	0.194	0.095	1
TRMT2B	0.0850667	0.114738	0.194	0.095	1
PRKAR1B	0.0850905	-0.191794	0.032	0.141	1
CD33	0.0851718	0.0920439	0.355	0.205	1
CTDSPL	0.0851743	0.133267	0.516	0.348	1
MIR100HG	0.0852739	-0.274373	0.839	0.944	1
NT5C3A	0.0852968	0.120776	0.419	0.263	1
RNF144B	0.0853198	0.12285	0.129	0.054	1
FSD1	0.0853537	0.206367	0.323	0.197	1
RITA1	0.0854212	-0.211068	0.129	0.266	1
UNC13B	0.085427	0.112508	0.258	0.138	1
BOLA3	0.0856235	0.193304	0.935	0.872	1
PODN	0.0856334	0.0347767	0.032	0.005	1
AL591888.1	0.0856334	0.0311196	0.032	0.005	1
NEUROD1	0.0856334	0.0274719	0.032	0.005	1
C2CD6	0.0856334	0.0347767	0.032	0.005	1
FZD5	0.0856334	0.0347767	0.032	0.005	1
UCN2	0.0856334	0.0347767	0.032	0.005	1
AC110609.1	0.0856334	0.0347767	0.032	0.005	1
LINC02102	0.0856334	0.0347767	0.032	0.005	1
AC005050.3	0.0856334	0.0311196	0.032	0.005	1
AC025917.1	0.0856334	0.0347767	0.032	0.005	1
LINC02253	0.0856334	0.0347767	0.032	0.005	1
PPL	0.0856334	0.0311196	0.032	0.005	1
CCDC42	0.0856334	0.0347767	0.032	0.005	1
AC100793.3	0.0856334	0.0347767	0.032	0.005	1
SERPINB4	0.0856334	0.0347767	0.032	0.005	1
AC009005.1	0.0856334	0.0347767	0.032	0.005	1
GRAMD4	0.0856334	0.0347767	0.032	0.005	1
RAB39B	0.0856334	0.0347767	0.032	0.005	1
HIST2H3PS2	0.085812	0.0609777	0.065	0.018	1
PIM1	0.085812	0.0609777	0.065	0.018	1
PMEL	0.085812	0.0609777	0.065	0.018	1
TRAC	0.085812	0.0609777	0.065	0.018	1
FRMD6-AS2	0.085812	0.0609777	0.065	0.018	1
RPL32	0.0858179	0.114394	1	1	1
MAPKAPK5-AS1	0.0859715	0.156135	0.452	0.294	1
STX5	0.0861322	0.133267	0.613	0.404	1
NCAPD3	0.0861845	0.184841	0.484	0.32	1
BRD2	0.0862089	-0.247656	0.226	0.386	1
NOL12	0.0863093	0.223869	0.452	0.315	1
RPL11	0.0863395	0.0976674	1	1	1
ENO3	0.0864405	0.149868	0.194	0.097	1
RNASET2	0.0864773	0.121368	0.355	0.21	1
CD96	0.0865951	0.0311196	0.032	0.005	1
CZIB	0.086718	-0.223095	0.419	0.609	1
SOCS7	0.086922	0.112508	0.161	0.074	1
NHP2	0.0869365	0.180679	1	0.944	1
AC109466.1	0.0869385	0.0573664	0.065	0.018	1
AP003049.2	0.0869387	0.0465866	0.065	0.018	1
ASAP1	0.0870128	-0.291817	0.677	0.816	1
ROBO3	0.0870366	-0.150526	0.032	0.141	1
HDAC3	0.0871189	0.109147	0.516	0.327	1
SP2	0.0872228	-0.147303	0.032	0.141	1
HPRT1	0.0872291	0.156983	0.839	0.693	1
HPCAL1	0.0872435	0.173013	0.935	0.847	1
CUL1	0.087302	0.164432	0.645	0.483	1
ZNF618	0.0873022	-0.229115	0.161	0.307	1
TMCO3	0.0873192	0.203558	0.677	0.522	1
TM2D1	0.0873359	0.26108	0.71	0.616	1
BECN1	0.0873665	-0.272258	0.323	0.46	1
JADE3	0.0875537	-0.123685	0	0.087	1
NDUFB3	0.0875579	0.170389	1	0.964	1
BTBD3	0.0875649	-0.196623	0.065	0.184	1
RNF182	0.0875837	-0.127067	0	0.087	1
SLC35G1	0.0875837	-0.127067	0	0.087	1
ANKRD29	0.0875837	-0.127067	0	0.087	1
AC025569.1	0.0876382	-0.137168	0	0.087	1
ZNF783	0.0876626	-0.150526	0	0.087	1
C16orf91	0.0877111	0.238516	0.516	0.381	1
TMEM87A	0.0880482	-0.301409	0.387	0.519	1
AC022613.1	0.0883359	0.206576	0.29	0.176	1
CRYBG3	0.0884492	0.15716	0.387	0.248	1
ERLEC1	0.0885085	-0.218353	0.806	0.872	1
ABL1	0.0885988	-0.259193	0.258	0.409	1
TSR2	0.0886211	0.122654	0.581	0.391	1
WDR4	0.0886676	0.245895	0.29	0.179	1
VPS13C	0.0887324	-0.25235	0.29	0.432	1
LMNB1	0.088917	0.154328	0.387	0.24	1
LDHB	0.0889774	0.164181	1	1	1
CYSTM1	0.0891234	-0.203065	0.355	0.532	1
METTL9	0.0891292	0.201417	0.871	0.78	1
WDR26	0.0891574	-0.197113	0.161	0.309	1
NHSL1	0.0892994	0.103027	0.226	0.118	1
TTK	0.089357	0.267376	0.29	0.171	1
YME1L1	0.0894077	-0.290966	0.452	0.583	1
ZNF365	0.0894166	0.0961135	0.129	0.054	1
NHSL2	0.0894851	-0.244393	0.097	0.223	1
RNPC3	0.0895386	0.113593	0.226	0.118	1
DAPK3	0.089586	-0.206926	0.258	0.414	1
DHRS4L2	0.0896517	0.348489	0.548	0.458	1
WNT2B	0.0897808	0.245895	0.258	0.153	1
TCTEX1D2	0.0898602	0.238976	0.645	0.517	1
RNF113A	0.0898799	-0.198223	0.097	0.225	1
NBN	0.0898954	0.231646	0.613	0.463	1
GTSE1	0.0899219	0.59724	0.387	0.284	1
TRIM32	0.0900175	0.105654	0.161	0.074	1
GADD45B	0.0901288	0.143101	0.645	0.481	1
NAV1	0.0901368	-0.332976	0.645	0.726	1
CNOT10	0.0901544	0.135996	0.419	0.263	1
PHF6	0.0901611	0.167267	0.581	0.419	1
CMTM4	0.0903705	-0.188662	0.032	0.138	1
SERTAD3	0.0903716	0.20647	0.548	0.432	1
CTAG2	0.0905533	0.0303893	0.161	0.072	1
IPO9	0.0907428	0.243431	0.516	0.355	1
PPP1R18	0.0908266	-0.263118	0.355	0.481	1
MEX3C	0.0909721	0.160871	0.226	0.123	1
SPAG4	0.091005	-0.176062	0.032	0.138	1
ZDHHC12	0.0910687	0.19589	0.839	0.703	1
FANCM	0.0911361	0.16889	0.258	0.146	1
VAT1	0.0913311	0.250836	0.581	0.437	1
TEDC1	0.0914428	0.141846	0.355	0.21	1
LSM4	0.091488	0.248981	1	0.939	1
MUL1	0.0917114	0.121448	0.194	0.097	1
DHODH	0.0917114	0.121448	0.194	0.097	1
LYSMD3	0.0917578	-0.252731	0.161	0.294	1
LRFN5	0.0918413	0.451455	0.355	0.22	1
TRAPPC4	0.0918974	-0.224579	0.871	0.9	1
WDR46	0.0920161	-0.258586	0.387	0.514	1
STRADA	0.0922328	-0.153743	0.032	0.138	1
SDHA	0.0922877	-0.244038	0.387	0.552	1
CCDC148	0.0923155	0.089144	0.129	0.054	1
DCTN2	0.0923263	0.171907	0.871	0.803	1
SUCLA2	0.0923469	-0.251984	0.419	0.575	1
RPL6	0.0924256	0.0869278	1	1	1
UNC119	0.0925008	0.229222	0.419	0.279	1
ZNF654	0.0925125	-0.216704	0.129	0.261	1
NDST3	0.0925406	0.120776	0.097	0.036	1
AC005562.1	0.0925662	0.129268	0.484	0.317	1
SRGAP2	0.0925761	-0.19973	0.097	0.23	1
CTU2	0.0926648	-0.22037	0.161	0.297	1
DYNC1LI1	0.0927317	0.210572	0.71	0.578	1
SMG5	0.0927524	0.175177	0.258	0.148	1
FBXO3	0.0927783	-0.204076	0.097	0.223	1
CYB561	0.0928071	-0.123685	0	0.084	1
ZFP62	0.0928349	-0.127067	0	0.084	1
AC016831.1	0.0928349	-0.127067	0	0.084	1
PIN4	0.0928623	0.197397	0.871	0.803	1
PHACTR1	0.0928847	-0.133809	0	0.084	1
MED11	0.093235	0.115087	0.516	0.332	1
GPC6	0.0932689	-0.147661	0.065	0.189	1
CYLD	0.0932977	0.102954	0.387	0.233	1
AURKA	0.093459	0.599434	0.387	0.261	1
PRR14L	0.0940338	0.107022	0.419	0.261	1
TRAPPC11	0.0942469	-0.184474	0.065	0.182	1
SEMA7A	0.0943006	-0.176062	0.097	0.238	1
LINC02246	0.0945548	0.120121	0.226	0.12	1
APEX2	0.0946419	-0.175294	0.065	0.182	1
RWDD2A	0.0946434	-0.184474	0.065	0.182	1
RAP1GAP2	0.0947884	-0.247311	0.129	0.256	1
SUZ12	0.0948241	-0.207965	0.323	0.527	1
TRAF3IP2	0.0950391	-0.178361	0.065	0.182	1
DIP2A	0.0951521	-0.217641	0.161	0.294	1
AC092969.1	0.0951852	0.114738	0.194	0.097	1
CEP120	0.0951852	0.114738	0.194	0.097	1
KANK1	0.0951852	0.114738	0.194	0.097	1
MPP3	0.0951852	0.114738	0.194	0.097	1
MPHOSPH10	0.0955328	-0.260479	0.387	0.522	1
SEC63	0.0957391	-0.223415	0.387	0.575	1
ASPM	0.0958656	0.556817	0.452	0.332	1
SH3PXD2B	0.0959258	-0.268644	0.161	0.292	1
IFI6	0.0959316	-0.0695789	0.355	0.591	1
LINC01687	0.0959823	-0.338418	0.226	0.345	1
ERH	0.0962212	0.134203	0.935	0.992	1
HIVEP3	0.0962333	-0.139522	0.29	0.455	1
LY6E	0.096329	-0.267271	0.806	0.89	1
ADGRF5	0.0964117	-0.16335	0.032	0.136	1
SLC25A25	0.0964462	0.120121	0.226	0.12	1
RAVER1	0.0965585	0.112508	0.258	0.143	1
HMGXB4	0.0966854	-0.251984	0.419	0.591	1
BTF3	0.0967529	0.108053	1	1	1
ZNF33B	0.0968202	0.184658	0.258	0.151	1
MOCOS	0.0968571	-0.166539	0.032	0.136	1
HTATSF1	0.0968997	0.126047	0.581	0.399	1
DNAJC5	0.0969214	-0.136533	0.129	0.271	1
FANCI	0.097083	0.260476	0.387	0.263	1
METTL6	0.097198	0.277783	0.419	0.297	1
MT2A	0.0973792	0.267906	1	0.99	1
ZNF141	0.0974009	0.0825132	0.097	0.036	1
SAP30L-AS1	0.0974009	0.0825132	0.097	0.036	1
DNAJB5	0.0974009	0.0825132	0.097	0.036	1
GPR68	0.0974009	0.0825132	0.097	0.036	1
DSC3	0.0974009	0.0825132	0.097	0.036	1
[truncated: 23,283 more rows]

## Sheet: gRNA-6vsgRNA1-DEG
Gene	p_val	avg_log2FC	pct.1	pct.2	p_val_adj
EEF1A2	1.83e-77	2.17339	0.753	0.013	4.63e-73
PLCL1	1.79e-51	1.67816	0.699	0.09	4.53e-47
CD248	1.73e-13	0.731383	0.637	0.348	4.37e-09
NINJ1	2.82e-13	0.656038	0.801	0.578	7.13e-09
HMGA1	6.34e-13	0.585176	1	0.997	1.6e-08
IGFBP7	8.35e-13	-0.529609	1	1	2.11e-08
RIMS3	3.82e-12	0.224343	0.13	0.003	9.65e-08
SH2D2A	4.06e-12	0.427833	0.342	0.1	1.03e-07
GSTO1	7.53e-12	0.57412	1	0.99	1.9e-07
KANK2	1.12e-11	0.529075	0.74	0.45	2.83e-07
PPP1R14B	2.76e-11	0.472174	1	1	6.99e-07
TOP1MT	4.15e-10	0.359384	0.384	0.143	1.05e-05
TMSB10	7.74e-10	-0.206395	1	1	1.96e-05
GPX4	1.77e-09	0.388155	1	0.995	4.48e-05
TIMP3	2.61e-09	-0.867185	0.808	0.931	6.59e-05
MGST1	2.85e-09	0.356426	1	0.997	7.22e-05
CAVIN3	3.87e-09	-0.409326	0.979	0.992	9.8e-05
IL20	5.37e-09	0.14634	0.096	0.003	0.000135759
TMEM158	5.96e-09	0.653011	0.979	0.957	0.000150649
DNAJC4	6.12e-09	0.40315	0.589	0.332	0.000154688
CTXND1	1.03e-08	0.23644	0.082	0	0.00025925
UCP2	1.31e-08	0.220977	0.192	0.041	0.000332204
STK32C	2.65e-08	0.364264	0.452	0.212	0.000668817
HSPB6	3.04e-08	0.461575	0.575	0.34	0.000768771
NME2	4.4e-08	0.17326	1	1	0.00111364
VCAN	7e-08	-0.648615	0.753	0.87	0.00177066
PRSS23	9.41e-08	-0.455678	0.836	0.931	0.00238025
CAMKMT	1.47e-07	0.464728	0.534	0.322	0.00372771
NUPR1	1.63e-07	-0.269399	0.096	0.327	0.00412109
CHAC2	1.9e-07	0.42401	0.466	0.253	0.00481067
ATP2B1	2.01e-07	0.564014	0.87	0.772	0.00507943
ZNF433-AS1	3.03e-07	0.33119	0.432	0.215	0.00764903
TXN	3.04e-07	0.249729	1	1	0.00768321
CCDC28B	3.5e-07	0.360719	0.712	0.491	0.00884789
IL6ST	3.56e-07	-0.528701	0.596	0.734	0.00901203
DBNDD2	3.65e-07	0.496787	0.76	0.611	0.00923284
ST3GAL1	3.73e-07	0.37076	0.521	0.297	0.00941982
TPM1	3.8e-07	-0.325668	1	0.997	0.00959792
FHOD3	3.98e-07	0.502555	0.671	0.486	0.0100521
TGM2	6.29e-07	0.476718	0.959	0.936	0.0159047
CHRDL1	8.52e-07	0.150898	0.116	0.018	0.0215299
CREB1	9.03e-07	0.353503	0.589	0.355	0.0228317
PIP4P2	9.29e-07	0.412267	0.637	0.432	0.0234819
METTL26	1.09e-06	0.327931	0.986	0.969	0.0274563
TMEM243	2.19e-06	0.327789	0.637	0.419	0.0553387
PPP1R14B-AS1	2.54e-06	0.325958	0.747	0.527	0.0642605
CLTB	2.83e-06	0.330808	0.979	0.972	0.0714344
CCL20	2.83e-06	0.685903	0.178	0.051	0.0715746
RAPGEF3	4.23e-06	0.171028	0.13	0.028	0.107046
NOTCH1	4.26e-06	0.262343	0.212	0.074	0.107799
RHOBTB3	4.34e-06	-0.422209	0.945	0.985	0.109656
DLL3	4.64e-06	0.254619	0.247	0.097	0.117318
DOK1	4.95e-06	0.314511	0.404	0.225	0.125067
TAGLN	5.32e-06	-0.438371	0.993	1	0.134475
TAX1BP3	5.32e-06	0.346966	0.842	0.706	0.134601
IL1B	5.33e-06	0.732871	0.932	0.818	0.134854
SMAGP	5.92e-06	0.368315	0.61	0.432	0.14976
RGS4	6.55e-06	-0.586882	0.384	0.581	0.165711
AC105446.1	6.88e-06	0.187145	0.185	0.059	0.173869
GGH	7.46e-06	0.39538	0.829	0.701	0.188729
SVIL	7.48e-06	0.414577	0.582	0.409	0.188998
CCDC85A	7.53e-06	-0.333359	0.062	0.235	0.190287
TMSB4X	9.1e-06	-0.270421	1	1	0.230068
CCN2	9.28e-06	-0.618636	0.925	0.957	0.234663
CD9	1.01e-05	-0.362308	0.774	0.923	0.254443
RRAS	1.18e-05	0.246776	1	0.995	0.298005
LGALS1	1.23e-05	-0.157551	1	1	0.3108
EBF3	1.31e-05	0.0992721	0.082	0.01	0.330685
CAMTA1	1.33e-05	0.257668	0.986	0.969	0.335459
NOVA2	1.35e-05	0.0675633	0.048	0	0.340157
SQSTM1	1.5e-05	0.617875	0.918	0.903	0.379658
ANKRD26	1.7e-05	0.336667	0.582	0.417	0.429537
LYPLAL1-DT	1.78e-05	0.18734	0.171	0.054	0.449343
BCL2A1	2.06e-05	0.22347	0.13	0.033	0.52021
FSTL3	2.22e-05	-0.416606	0.356	0.532	0.56104
AC091607.2	2.32e-05	0.117194	0.11	0.023	0.58605
ACTG1	2.32e-05	0.304179	1	0.997	0.586857
USP12	2.37e-05	0.30136	0.493	0.317	0.59801
SERPINB2	2.42e-05	0.283124	0.274	0.125	0.61092
S100A10	3e-05	-0.345358	0.979	0.992	0.758283
PMEL	3.53e-05	0.111872	0.096	0.018	0.891763
SSR3	3.63e-05	0.224866	1	1	0.916521
PARP16	3.68e-05	0.201152	0.151	0.046	0.931375
RHOQ	3.8e-05	0.355183	0.589	0.422	0.961543
RPS19BP1	4.06e-05	0.348736	0.959	0.91	1
TCEA2	4.13e-05	0.316864	0.555	0.389	1
PTK2	4.23e-05	-0.362591	0.651	0.826	1
EBPL	4.23e-05	0.273006	0.911	0.857	1
ATP1A1	4.23e-05	0.31318	0.753	0.601	1
FIS1	4.46e-05	0.228291	1	0.997	1
MYH10	4.69e-05	0.273557	0.404	0.23	1
ADIRF	4.96e-05	-0.319774	0.863	0.913	1
NDUFB8	5.43e-05	0.219335	0.993	1	1
LINC01724	5.68e-05	0.058103	0.041	0	1
EFNA5	6.28e-05	0.372291	0.322	0.176	1
SNTG2	6.43e-05	0.134896	0.103	0.023	1
DDIT4L	6.43e-05	0.143666	0.103	0.023	1
DTWD1	6.68e-05	0.408348	0.719	0.645	1
PSMC4	7.5e-05	-0.226104	0.836	0.921	1
PAM16	7.84e-05	0.314942	0.897	0.885	1
STEAP1	8.74e-05	0.382771	0.726	0.616	1
MYL6	9.1e-05	-0.124182	1	1	1
CNTNAP3B	9.44e-05	-0.206557	0.055	0.192	1
PRDX4	9.47e-05	0.272443	0.993	0.992	1
MMP2	0.000103352	-0.353321	0.5	0.652	1
ANXA5	0.000109272	-0.179489	1	1	1
KRT18	0.000115289	-0.433163	0.945	0.98	1
DCUN1D5	0.000126493	0.327132	0.829	0.698	1
BCAS4	0.000131742	0.345384	0.5	0.338	1
PKM	0.000134941	0.180688	1	1	1
RTN4	0.000140404	0.228555	1	1	1
ECI2	0.000148917	0.23531	0.973	0.895	1
RFLNB	0.000157114	0.281152	0.808	0.657	1
CYC1	0.000163593	-0.262436	0.712	0.818	1
IER3IP1	0.000163707	0.217454	0.918	0.921	1
STXBP5-AS1	0.000171595	0.161908	0.267	0.128	1
STC1	0.00017873	0.368896	0.678	0.488	1
HSPB1	0.000181925	-0.195644	1	0.997	1
MARCKS	0.00018745	-0.3447	0.938	0.962	1
IL7R	0.000187605	0.237559	0.356	0.197	1
DCLK2	0.000189782	-0.468096	0.295	0.46	1
BGN	0.00019531	-0.357469	0.486	0.642	1
DUSP11	0.000205086	-0.281599	0.26	0.419	1
EDIL3	0.000215845	-0.365312	0.342	0.509	1
WDR76	0.000223129	0.263225	0.349	0.197	1
SLC20A1	0.000234643	0.468334	0.801	0.693	1
CBLC	0.000241492	0.058103	0.034	0	1
BRMS1L	0.00024349	0.227663	0.301	0.164	1
IER3	0.00025185	0.413831	1	0.98	1
FBLN2	0.000253884	-0.329021	0.281	0.43	1
QPCT	0.000255323	0.330326	0.603	0.445	1
RGS10	0.000261011	0.259031	0.932	0.887	1
NDUFA13	0.000262379	0.174588	1	0.997	1
FILIP1L	0.000272305	0.410023	0.692	0.581	1
STMN1	0.000283327	0.367997	0.959	0.898	1
THY1	0.000293905	-0.308915	0.87	0.926	1
AC026316.5	0.000298583	0.16583	0.151	0.056	1
CENPV	0.00030129	0.266872	0.603	0.437	1
CDC42EP1	0.000303792	0.260335	0.589	0.425	1
TARID	0.000321031	0.127701	0.103	0.028	1
IFIT1	0.00034145	-0.200288	0.048	0.166	1
TFAP2A	0.000349676	-0.257325	0.267	0.44	1
MYEOV	0.00037488	0.252601	0.89	0.852	1
DDA1	0.000377128	0.275349	0.747	0.624	1
FADS1	0.000378391	0.308897	0.623	0.486	1
DOCK5	0.000384418	-0.349204	0.788	0.844	1
DNAAF3	0.000389546	0.119122	0.075	0.015	1
SAMD11	0.000404422	-0.322346	0.185	0.322	1
TAOK3	0.000407541	0.335938	0.747	0.593	1
SPOCK1	0.000408602	-0.417156	0.582	0.708	1
GINM1	0.000409488	0.227366	0.808	0.637	1
MCM3	0.00041532	0.338211	0.479	0.34	1
PHKG2	0.000432746	0.221694	0.473	0.317	1
DSCC1	0.000434224	0.170877	0.247	0.12	1
PTGES3	0.000436999	0.199421	0.993	0.997	1
UGCG	0.000455349	0.33793	0.747	0.642	1
FYB1	0.00045703	-0.3719	0.377	0.532	1
ANXA9	0.000468251	0.0544179	0.041	0.003	1
MAGEE1	0.000468251	0.0544179	0.041	0.003	1
RALGAPA2	0.000502935	-0.154364	0.041	0.153	1
PPIP5K2	0.000507567	0.270958	0.575	0.425	1
LXN	0.000540097	0.311576	0.692	0.537	1
ATP1B1	0.000542538	0.28021	0.486	0.343	1
ANXA4	0.000547156	-0.284127	0.548	0.683	1
ORC2	0.000549713	0.244666	0.452	0.304	1
SLC7A2	0.000556003	-0.297731	0.068	0.189	1
FN1	0.000557409	-0.390825	0.959	0.98	1
AC015871.1	0.000573584	0.211408	0.438	0.289	1
EID1	0.000574006	0.179583	1	0.997	1
TMEM14C	0.000574458	0.162598	0.993	0.995	1
SRGAP1	0.000574727	0.300418	0.685	0.532	1
ITGAV	0.000578563	-0.286619	0.452	0.611	1
MOK	0.000587241	0.33861	0.541	0.389	1
SDSL	0.000599819	0.21268	0.342	0.202	1
AC097451.1	0.00060806	0.0736073	0.062	0.01	1
OGFRL1	0.000631082	0.318282	0.856	0.788	1
HIF1A	0.000635943	0.349451	0.945	0.959	1
TSPAN4	0.000655429	-0.24314	0.938	0.969	1
FAM49B	0.000676027	0.244089	0.726	0.596	1
MPP4	0.000685526	0.171307	0.267	0.141	1
MPG	0.000705967	0.183166	0.986	0.98	1
TAF12	0.000710025	-0.268631	0.493	0.652	1
PTPN2	0.000721728	0.266623	0.466	0.327	1
ELOVL1	0.00072416	0.309725	0.747	0.581	1
TMEM40	0.000728174	0.149654	0.123	0.043	1
MCM9	0.000737432	0.176932	0.233	0.118	1
TSPAN10	0.000754296	-0.210493	0.103	0.23	1
PRSS12	0.000800891	-0.234152	0.192	0.335	1
TSPAN12	0.000803268	0.111418	0.137	0.051	1
CARD19	0.000828285	0.242955	0.719	0.616	1
LHFPL6	0.000868278	0.254258	0.527	0.384	1
GSTZ1	0.000881621	-0.248425	0.219	0.361	1
CLGN	0.000881927	0.2442	0.397	0.261	1
ECHS1	0.000882561	-0.261928	0.801	0.905	1
SELENOM	0.000887677	-0.238168	0.993	0.997	1
IGFBP6	0.000893372	-0.305797	0.966	0.98	1
NCOA2	0.000897164	0.199745	0.384	0.235	1
EHD1	0.000924607	0.29293	0.521	0.402	1
HIST1H3C	0.000937791	0.0992721	0.11	0.036	1
YWHAE	0.000939192	0.169881	1	0.997	1
UNKL	0.000942298	0.182954	0.192	0.092	1
HSPA12A	0.000962399	0.211165	0.281	0.159	1
NDUFS8	0.000962958	0.215855	0.986	0.987	1
PLP2	0.000983289	0.251479	0.979	0.918	1
CMC4	0.000996538	0.248034	0.473	0.332	1
LINC00242	0.00103782	0.0389941	0.027	0	1
EVI2B	0.00103782	0.0389941	0.027	0	1
UPB1	0.00103782	0.0389941	0.027	0	1
PI16	0.0010379	0.058103	0.027	0	1
MEIS3	0.00105003	0.204794	0.329	0.199	1
BAG1	0.00105332	-0.290295	0.473	0.598	1
ADAM23	0.00105871	0.293135	0.377	0.253	1
CHAF1A	0.00106874	0.172916	0.349	0.205	1
TTL	0.00109184	0.23403	0.411	0.276	1
PGK1	0.00109449	0.227862	1	0.974	1
FNBP1L	0.00110735	0.239593	0.473	0.338	1
ADK	0.00110961	0.264196	0.918	0.849	1
GMNN	0.00113365	0.352534	0.575	0.448	1
OXCT1	0.00113779	0.236776	0.5	0.34	1
STEAP3	0.0011429	0.185781	0.233	0.123	1
IL11	0.00115744	0.477683	0.979	0.941	1
FHL2	0.00115918	-0.288926	0.959	0.969	1
LRCH4	0.00117341	0.182013	0.205	0.102	1
DYNC1I1	0.00118098	0.202247	0.151	0.064	1
SLC16A3	0.00118394	0.247788	0.884	0.775	1
XRCC3	0.00118909	0.172853	0.192	0.092	1
JUND	0.00120261	0.258654	0.986	0.972	1
DSTN	0.00121064	-0.169695	1	1	1
ATP6V1C1	0.00122078	0.225825	0.404	0.261	1
COPA	0.00124652	-0.206831	0.671	0.785	1
SERPINB7	0.00125569	0.281475	0.445	0.309	1
NCOA3	0.00125702	-0.194841	0.253	0.412	1
KHDRBS3	0.00126802	0.209565	0.486	0.327	1
IFT22	0.00127138	0.263335	0.616	0.506	1
CTSA	0.00128209	0.242769	0.726	0.616	1
NIPSNAP3A	0.0012881	0.184541	0.466	0.32	1
HIST1H1B	0.00131275	0.436193	0.384	0.248	1
EIF4EBP1	0.00134979	0.193749	0.959	0.944	1
RBM41	0.00135805	0.159393	0.301	0.174	1
COL4A1	0.0013733	-0.336647	0.781	0.836	1
SRSF10	0.00138474	0.216784	0.822	0.754	1
NLGN1	0.00141251	-0.387605	0.432	0.565	1
CCDC85B	0.0014147	-0.286692	0.945	0.98	1
PLEKHA3	0.00141911	0.289858	0.637	0.527	1
RBBP8	0.00142348	0.20207	0.479	0.332	1
HEATR5A	0.00143952	-0.215663	0.212	0.353	1
WNK4	0.00148017	-0.237419	0.295	0.455	1
TBCB	0.00153822	0.188269	0.959	0.951	1
RPS21	0.0015399	-0.128904	1	1	1
RPA2	0.00155069	0.270641	0.425	0.299	1
RAP1GAP2	0.00158318	0.251963	0.384	0.256	1
GSTA4	0.00158585	0.205661	0.342	0.217	1
COL1A1	0.0015969	-0.227453	0.979	0.985	1
DKK2	0.00161259	0.128055	0.062	0.013	1
HERPUD1	0.00161342	-0.227251	0.575	0.719	1
PALLD	0.00161837	-0.264164	0.918	0.944	1
PDGFRA	0.00162252	-0.225277	0.137	0.266	1
PCNA	0.00163451	0.314424	0.623	0.491	1
RABAC1	0.00164522	-0.19091	0.993	0.997	1
ZNF789	0.00166407	0.145227	0.247	0.133	1
OSMR	0.00166562	0.213832	0.541	0.412	1
B4GALNT1	0.00173579	0.212757	0.226	0.123	1
GSKIP	0.00175218	0.174363	0.356	0.223	1
VIM	0.00175366	0.169784	1	1	1
GADD45GIP1	0.00180304	0.16508	1	1	1
IGF1R	0.00180629	0.331151	0.527	0.404	1
ATP11A	0.00181004	0.199814	0.315	0.194	1
HELLS	0.00181384	0.324985	0.548	0.422	1
POLR2L	0.0018407	-0.150701	1	1	1
OAZ1	0.00186197	0.113826	1	1	1
PNPLA6	0.00189639	0.245239	0.322	0.199	1
TUBB2B	0.00189967	0.0918926	0.034	0.003	1
LINC01703	0.00191055	0.0448951	0.034	0.003	1
AC107068.1	0.00191055	0.0448951	0.034	0.003	1
NALT1	0.00191055	0.0448951	0.034	0.003	1
NTAN1	0.0019843	0.233376	0.753	0.619	1
LINC02742	0.00198846	0.273325	0.507	0.35	1
SMIM26	0.00199081	0.208341	0.966	0.923	1
MYL9	0.00200276	-0.220641	1	0.992	1
ACTB	0.00208223	-0.141684	1	1	1
RFC4	0.00208463	0.248364	0.466	0.317	1
HIST1H3D	0.00211328	0.274146	0.267	0.156	1
CD163L1	0.00217115	-0.205207	0.192	0.33	1
CDK2AP1	0.00219644	0.19515	0.932	0.882	1
PHLDA2	0.00220224	-0.234588	0.993	1	1
AC027601.6	0.00220842	0.10815	0.103	0.036	1
HIST1H2AD	0.00222839	0.0507423	0.041	0.005	1
LINC02076	0.00222839	0.0507423	0.041	0.005	1
AC034268.2	0.00222839	0.0507423	0.041	0.005	1
ITGBL1	0.00225627	-0.390068	0.425	0.547	1
CALD1	0.00228749	-0.204287	1	1	1
QSOX1	0.00231314	0.232818	0.829	0.757	1
USP1	0.00235439	0.244241	0.61	0.458	1
PPFIA1	0.00236881	-0.192818	0.315	0.468	1
ANAPC13	0.00239519	0.209596	0.705	0.57	1
SDHB	0.00239714	-0.187908	0.678	0.767	1
ASCC3	0.00243725	0.280403	0.795	0.775	1
TMEM132A	0.00243811	0.263321	0.548	0.437	1
CAVIN1	0.00244337	-0.252324	0.925	0.964	1
REXO2	0.00244548	-0.181961	1	0.997	1
DLC1	0.00247096	-0.227811	0.726	0.824	1
PSMC3IP	0.00249369	0.285724	0.411	0.289	1
KDM6A	0.00250658	0.179936	0.363	0.233	1
C9orf116	0.00253465	-0.107439	0.014	0.087	1
FKBP7	0.00254211	0.290868	0.507	0.394	1
KCTD10	0.00256671	-0.134318	0.103	0.22	1
NPR3	0.00257222	-0.214284	0.068	0.169	1
CMTM7	0.00259453	0.190903	0.329	0.205	1
METTL21A	0.00263793	0.151111	0.253	0.143	1
PDLIM5	0.00268129	-0.285102	0.925	0.964	1
LMAN1	0.00268846	-0.183893	0.993	0.99	1
FRMPD4	0.00268896	0.275494	0.493	0.361	1
AC090409.1	0.002714	0.176428	0.527	0.379	1
EZH2	0.00272346	0.225135	0.377	0.251	1
SMIM27	0.0027971	0.144254	0.418	0.279	1
NFAT5	0.0028028	0.218658	0.678	0.581	1
AC092428.1	0.00292653	0.0699778	0.068	0.018	1
PIGA	0.00292653	0.0699778	0.068	0.018	1
ACTA2	0.00293568	-0.601423	0.459	0.568	1
TAF1B	0.0029688	0.169417	0.466	0.317	1
NEK10	0.00297443	-0.221803	0.178	0.307	1
CPNE7	0.00300723	0.147101	0.219	0.118	1
STK39	0.00304818	0.267504	0.568	0.458	1
SNX7	0.00305763	0.205223	0.671	0.547	1
POMP	0.00306513	0.11952	1	1	1
DHRS11	0.00311147	0.11931	0.178	0.087	1
SRI	0.00313531	0.185647	0.993	0.99	1
ENO2	0.00321413	0.247552	0.466	0.35	1
LSM10	0.00325791	0.276429	0.795	0.762	1
MOCS1	0.00327821	0.0813502	0.096	0.033	1
INO80	0.00328681	-0.195153	0.26	0.394	1
TRAM2-AS1	0.00329552	0.119785	0.151	0.069	1
FANCL	0.00330232	0.214213	0.493	0.363	1
MICA	0.0033317	0.196159	0.637	0.512	1
SMAD1	0.00333315	0.146578	0.24	0.136	1
MAP1LC3A	0.00333451	0.239336	0.719	0.601	1
AC025171.1	0.00335735	0.196674	0.247	0.143	1
MAP3K13	0.00342011	-0.262431	0.521	0.614	1
CST3	0.00345621	-0.186318	0.986	0.987	1
ASIC1	0.00346571	-0.0789732	0	0.056	1
AMN1	0.00348974	0.174406	0.295	0.182	1
LINC01578	0.00351647	0.188443	0.678	0.55	1
CCDC71L	0.00351868	0.273302	0.623	0.524	1
SNAPC1	0.00353902	0.216982	0.658	0.558	1
ZNF688	0.00354945	0.139307	0.274	0.161	1
EIF2AK4	0.00359403	0.233422	0.829	0.77	1
BLVRB	0.00365292	-0.244558	0.678	0.76	1
CERS2	0.00367229	0.190373	0.575	0.442	1
LMOD1	0.00368027	-0.22233	0.171	0.292	1
IL24	0.00369897	0.335878	0.199	0.105	1
SYNGR1	0.00371365	-0.231975	0.171	0.292	1
MORF4L1	0.00371672	-0.161177	0.993	1	1
COL1A2	0.00376185	-0.221669	0.932	0.967	1
AC002480.2	0.00379134	0.169975	0.178	0.09	1
CALM2	0.00380557	0.152688	1	1	1
AP000569.1	0.00381411	0.0643294	0.062	0.015	1
GALNT10	0.00383601	-0.263899	0.616	0.701	1
KCNN4	0.00386206	-0.157813	0.096	0.202	1
STMP1	0.00387866	-0.160058	0.925	0.974	1
IDUA	0.00389384	0.0867812	0.103	0.038	1
DSP	0.00392584	-0.428345	0.726	0.765	1
C6orf62	0.00395413	-0.211515	0.322	0.453	1
ANXA1	0.00395762	-0.283056	0.993	0.997	1
CCNE2	0.00399829	0.243515	0.24	0.141	1
HOXB-AS1	0.00403099	0.173679	0.226	0.13	1
COX7C	0.00404242	0.119527	1	1	1
TMEM237	0.00412323	0.304705	0.589	0.527	1
ASAP2	0.00412585	-0.208254	0.555	0.675	1
GADD45A	0.00413683	-0.37979	0.664	0.734	1
SRPRB	0.00417905	0.24223	0.514	0.404	1
UTP25	0.00419747	0.174323	0.377	0.251	1
CENPQ	0.00423885	0.129019	0.295	0.176	1
RCAN1	0.00427977	0.248811	0.445	0.33	1
INHBA	0.00428369	0.459724	0.945	0.962	1
CEP41	0.0042961	0.162579	0.247	0.143	1
EFNB1	0.00431856	0.0811248	0.075	0.023	1
FBXL8	0.00432572	0.115951	0.178	0.09	1
PHB	0.00438167	0.166236	0.966	0.969	1
CSTB	0.00440116	-0.167981	1	1	1
EVI5	0.0044457	0.271999	0.651	0.547	1
HSPBAP1	0.0044834	-0.107824	0.021	0.092	1
LINC01376	0.00450019	0.0758717	0.089	0.031	1
SHC3	0.00451969	0.209871	0.178	0.095	1
LINC01141	0.00454887	0.029344	0.021	0	1
BMP8A	0.00454887	0.029344	0.021	0	1
AC073046.3	0.00454887	0.029344	0.021	0	1
LINC02233	0.00454887	0.029344	0.021	0	1
AC073130.2	0.00454887	0.029344	0.021	0	1
LINC02235	0.00454887	0.029344	0.021	0	1
PRR26	0.00454887	0.029344	0.021	0	1
AL160254.1	0.00454887	0.029344	0.021	0	1
AC023906.5	0.00454887	0.029344	0.021	0	1
PKD1L3	0.00454887	0.029344	0.021	0	1
MIR133A1HG	0.00454887	0.029344	0.021	0	1
TUBB4A	0.00454887	0.029344	0.021	0	1
FAM209B	0.00454887	0.029344	0.021	0	1
AC007663.3	0.00454887	0.029344	0.021	0	1
GTSE1-DT	0.00454887	0.029344	0.021	0	1
LINC01226	0.00454902	0.0389941	0.021	0	1
CREG2	0.00454902	0.0389941	0.021	0	1
ZNF732	0.00454902	0.0389941	0.021	0	1
OSTC	0.00456984	0.186905	1	0.995	1
ZNF655	0.00459364	0.172576	0.397	0.269	1
SUPT3H	0.00459458	0.151111	0.568	0.437	1
RFTN1	0.00461759	-0.194235	0.253	0.389	1
NARS2	0.00462564	-0.180441	0.164	0.281	1
GREM1	0.00464018	0.217581	0.753	0.639	1
NOL4L	0.00464673	0.141945	0.315	0.199	1
PPP4R3A	0.00465212	0.120967	0.342	0.217	1
ABHD3	0.004655	0.228991	0.281	0.179	1
AIFM1	0.00466701	-0.166291	0.233	0.366	1
VAPA	0.00466995	-0.167888	0.952	0.967	1
FNBP4	0.00467601	-0.246461	0.404	0.509	1
UBXN6	0.00467983	-0.219526	0.295	0.427	1
BCL7B	0.00476263	0.165641	0.562	0.419	1
KHSRP	0.00477384	0.196266	0.459	0.33	1
PRKCZ	0.00480286	0.067968	0.055	0.013	1
PYCR2	0.00481451	0.161333	0.568	0.422	1
HIST1H1C	0.00482252	0.405097	0.575	0.45	1
GLRX	0.0048251	-0.251303	0.959	0.992	1
AC079160.1	0.00483648	-0.110813	0.014	0.079	1
CTHRC1	0.00487328	-0.323986	0.253	0.366	1
ABCG2	0.00489054	0.0586302	0.055	0.013	1
GPC6	0.00496734	0.201673	0.301	0.189	1
S100A11	0.00501891	-0.110404	1	1	1
RTRAF	0.00506411	0.193002	0.986	0.957	1
CENPW	0.00514439	0.316651	0.822	0.724	1
LYPLA1	0.00517184	0.222625	0.712	0.591	1
PCDH10	0.00523628	-0.196393	0.541	0.673	1
PIK3C2A	0.00525023	0.218867	0.527	0.409	1
CEBPB	0.00528669	0.314202	0.849	0.813	1
GLO1	0.00532852	0.213724	0.76	0.637	1
DTD1	0.00533403	0.167534	0.925	0.872	1
APLP1	0.00535352	0.107734	0.164	0.082	1
PDE5A	0.00536721	-0.15785	0.096	0.197	1
CMSS1	0.00540118	-0.263535	0.507	0.609	1
SRPX	0.0054233	0.212522	0.616	0.496	1
TRIM22	0.00546917	-0.108949	0.027	0.102	1
POLG2	0.00547915	-0.141736	0.055	0.141	1
UNC119	0.00549863	0.157093	0.411	0.279	1
TMEM107	0.00561434	0.204807	0.452	0.338	1
FTH1	0.00570348	0.238452	1	1	1
FAH	0.00570901	0.220578	0.466	0.35	1
AFAP1	0.00578053	-0.301487	0.705	0.78	1
BTC	0.00585358	0.0755761	0.068	0.02	1
LGMN	0.00587531	-0.244645	0.459	0.552	1
AC068724.3	0.00591005	0.112153	0.226	0.128	1
CCDC146	0.00591428	-0.111532	0.027	0.1	1
PRKG1	0.00591594	0.314285	0.61	0.504	1
GALNT6	0.00591667	0.183551	0.363	0.243	1
NEFL	0.00594287	0.66662	0.473	0.34	1
METRNL	0.00594492	0.25545	0.747	0.665	1
SYF2	0.00595887	-0.218321	0.603	0.724	1
SERPINE2	0.00595921	-0.250998	0.877	0.921	1
AC002116.2	0.00599716	0.0663575	0.068	0.02	1
AC058791.1	0.00603684	0.0719648	0.068	0.02	1
FBXO8	0.00604076	-0.134498	0.116	0.223	1
AC003102.1	0.00611801	0.0528792	0.048	0.01	1
AL031590.1	0.00611801	0.0528792	0.048	0.01	1
PDCD2	0.00611928	0.23926	0.733	0.665	1
RFX1	0.0061503	0.109031	0.212	0.118	1
COL6A3	0.00616919	-0.259948	0.945	0.977	1
USP19	0.00617562	-0.112232	0.041	0.12	1
SMTN	0.00618858	-0.286221	0.411	0.501	1
AL162717.1	0.00619119	0.0586302	0.048	0.01	1
SEPSECS-AS1	0.00622635	0.0852653	0.123	0.054	1
GATA6	0.00622731	-0.115507	0.027	0.1	1
LINC01435	0.00625051	0.241802	0.384	0.266	1
RTF1	0.00627115	0.227028	0.781	0.716	1
PLN	0.00631275	0.0699778	0.048	0.01	1
KLHL18	0.00632785	-0.153095	0.185	0.304	1
NCK1	0.00641918	0.189141	0.5	0.379	1
ARHGAP29	0.0064972	0.212366	0.815	0.752	1
PDXK	0.00650283	0.186677	0.945	0.905	1
C5orf46	0.0065168	-0.315765	0.39	0.499	1
SCRN1	0.00651863	0.174706	0.329	0.223	1
FAT1	0.0065264	-0.227409	0.582	0.685	1
ZWINT	0.00652802	0.180359	0.568	0.414	1
SNAPC5	0.00652949	0.191552	0.507	0.384	1
EFEMP2	0.00657018	-0.237135	0.699	0.734	1
ASAP1	0.00669523	0.222345	0.856	0.816	1
RHOA	0.00671603	-0.167817	1	1	1
POLR2E	0.00672516	0.190329	0.801	0.703	1
AC244153.1	0.00673416	0.20302	0.459	0.34	1
MT-CO3	0.00674727	-0.133283	1	1	1
FAM180A	0.00675017	-0.187875	0.171	0.284	1
PPP5C	0.00680428	0.20609	0.384	0.266	1
TIMP1	0.00681188	0.562542	1	0.997	1
EMP1	0.00686071	-0.251574	0.658	0.721	1
CAPN7	0.00686407	-0.153548	0.212	0.338	1
SSX2IP	0.00692649	-0.192383	0.219	0.335	1
MYBL2	0.00695958	0.138169	0.301	0.192	1
SHMT2	0.00699569	-0.240631	0.322	0.43	1
AL355916.1	0.00701902	0.259394	0.199	0.113	1
RARG	0.00705394	0.150214	0.274	0.171	1
CXCL1	0.00706807	-1.01252	0.452	0.527	1
NUP62	0.00711206	0.182628	0.397	0.281	1
DNM1	0.00723529	0.136411	0.199	0.11	1
TNIP1	0.00723713	0.229746	0.562	0.476	1
PLAU	0.0072716	0.254642	0.521	0.399	1
ANKRD45	0.00734929	0.0470759	0.041	0.008	1
NKX3-1	0.00734929	0.0470759	0.041	0.008	1
TSPOAP1	0.00734929	0.0470759	0.041	0.008	1
U2AF1L5	0.00734929	0.0470759	0.041	0.008	1
PLA2G6	0.00734929	0.0470759	0.041	0.008	1
DPP7	0.00736912	-0.19256	0.418	0.56	1
TTI1	0.007397	0.131694	0.199	0.11	1
BRAT1	0.00741575	0.120691	0.267	0.164	1
NEDD4L	0.00743962	0.223817	0.473	0.358	1
PSME1	0.00744558	-0.144989	0.897	0.939	1
LY6E	0.00753158	-0.195471	0.849	0.89	1
CTSC	0.00755702	0.142899	0.986	0.985	1
PACS1	0.00756935	-0.258425	0.527	0.639	1
CPS1	0.00759881	-0.101946	0.034	0.107	1
TK1	0.00768391	0.305723	0.74	0.673	1
USP18	0.00769111	-0.0760949	0.007	0.061	1
CEP128	0.00771028	0.173933	0.336	0.225	1
AC122685.1	0.00771954	0.0448951	0.027	0.003	1
CLCN3	0.00773849	-0.168869	0.233	0.355	1
TPM4	0.00774509	-0.168187	1	1	1
AC008771.1	0.00775073	0.143578	0.336	0.22	1
AL139011.1	0.00776233	0.0353091	0.027	0.003	1
ST6GAL1	0.00776233	0.0353091	0.027	0.003	1
AC007285.1	0.00776233	0.0353091	0.027	0.003	1
AC007032.1	0.00776233	0.0353091	0.027	0.003	1
AP005717.2	0.00776233	0.0353091	0.027	0.003	1
DMRTA1	0.00776233	0.0353091	0.027	0.003	1
OTOGL	0.00776233	0.0353091	0.027	0.003	1
AC078909.1	0.00776233	0.0353091	0.027	0.003	1
AC090772.2	0.00776233	0.0353091	0.027	0.003	1
GRPR	0.00776233	0.0353091	0.027	0.003	1
TMEFF2	0.00786327	-0.163762	0.062	0.146	1
ADCY9	0.00788142	-0.127004	0.075	0.166	1
LINC00265	0.00789878	0.0699778	0.062	0.018	1
AP2M1	0.00797462	0.144694	1	1	1
HAND2-AS1	0.00801415	0.105998	0.164	0.084	1
SCUBE3	0.00801604	-0.339919	0.486	0.575	1
AC009120.2	0.00805073	0.0992721	0.178	0.095	1
AC004817.3	0.00807284	0.0607	0.062	0.018	1
MRPL19	0.00811579	0.202912	0.74	0.634	1
AL078600.1	0.00811721	0.0602026	0.034	0.005	1
AL135791.1	0.00811721	0.0602026	0.034	0.005	1
RBM12B	0.00812619	-0.106944	0.089	0.187	1
MICOS13	0.00813887	-0.148612	0.973	0.98	1
GCFC2	0.00815136	0.112381	0.329	0.212	1
PJVK	0.00819324	0.0412195	0.034	0.005	1
AC073848.1	0.00819324	0.0412195	0.034	0.005	1
AC008610.1	0.00819324	0.0412195	0.034	0.005	1
AC024941.2	0.00819324	0.0412195	0.034	0.005	1
VAPB	0.00824039	0.160334	0.39	0.274	1
C1D	0.00826066	0.196048	0.753	0.675	1
TRHDE-AS1	0.00827522	0.149121	0.37	0.253	1
FAM167A	0.00832341	0.143761	0.24	0.143	1
TGFBR3L	0.00834734	0.166203	0.397	0.292	1
ZNF346	0.00838664	0.197729	0.212	0.125	1
SNAPC3	0.00840386	-0.155985	0.226	0.345	1
BLOC1S1	0.00844337	0.1574	0.986	0.954	1
S1PR5	0.0084473	-0.0649322	0	0.046	1
CALM1	0.00846677	-0.128692	1	1	1
SLC25A20	0.00846884	0.0957143	0.096	0.038	1
NDUFA8	0.00848574	-0.179495	0.877	0.916	1
LPCAT4	0.00849078	0.173633	0.342	0.235	1
SETD7	0.00860259	0.273039	0.521	0.43	1
BRD8	0.00860951	-0.19787	0.301	0.422	1
MADD	0.0086242	-0.119073	0.048	0.125	1
CTBP2	0.00865651	0.300994	0.589	0.519	1
SFXN3	0.00870831	0.112011	0.24	0.143	1
2023-03-06	0.00881672	-0.202109	0.288	0.404	1
SH3GLB2	0.00885912	-0.191777	0.308	0.432	1
SPSB3	0.00889519	0.137784	0.336	0.223	1
RASSF8	0.0088971	-0.1848	0.575	0.693	1
TMEM167A	0.00890378	-0.153935	0.911	0.916	1
CDV3	0.00892863	-0.200599	0.747	0.752	1
PRPS2	0.00893433	0.146066	0.247	0.153	1
ROCK1	0.0089709	0.191954	0.856	0.757	1
ALDH1B1	0.00899139	-0.117369	0.075	0.164	1
TNIP3	0.00915684	0.108042	0.103	0.043	1
PFN2	0.00920222	0.201235	0.699	0.563	1
HIST1H2AH	0.00921377	0.275221	0.199	0.113	1
CFDP1	0.00926639	0.179551	0.918	0.913	1
SOBP	0.00928499	0.122951	0.144	0.072	1
ASAP3	0.00929411	-0.100665	0.014	0.072	1
NUDT8	0.0093966	-0.114853	0.075	0.164	1
ERAL1	0.00941055	0.124219	0.37	0.258	1
LRRC14	0.00949028	0.0923361	0.137	0.066	1
G3BP2	0.00955131	0.186435	0.87	0.765	1
E2F3	0.00955132	0.17529	0.377	0.269	1
TAGLN2	0.00955861	-0.120694	1	0.995	1
IRF7	0.00955879	-0.117069	0.068	0.153	1
THEM6	0.00957219	-0.0760949	0.007	0.059	1
ZNF808	0.00960874	0.117524	0.178	0.097	1
SNHG5	0.00964104	-0.170511	0.979	0.987	1
ZNF331	0.00969599	-0.132192	0.055	0.133	1
STEAP2	0.00972627	0.159363	0.281	0.182	1
MT-ATP6	0.00973118	-0.168319	1	1	1
PDGFA	0.00975769	0.126017	0.267	0.169	1
PNMA2	0.00979536	-0.151913	0.096	0.189	1
RSU1	0.00980774	-0.210672	0.712	0.762	1
BSG	0.00981421	0.144704	0.973	0.957	1
FGFR1OP	0.0100265	0.115986	0.281	0.176	1
DDR2	0.0100272	0.223869	0.699	0.621	1
CXCL12	0.0100731	-0.388486	0.397	0.486	1
DNER	0.0100856	0.323047	0.582	0.483	1
SLIT3	0.0101383	-0.126078	0.158	0.271	1
HHLA3	0.0101557	0.0838053	0.137	0.066	1
AL133453.1	0.0101785	0.194692	0.479	0.371	1
LINC02802	0.0101862	-0.206933	0.753	0.862	1
SIM2	0.0102721	-0.150216	0.288	0.425	1
SDHAF3	0.0103039	0.16024	0.432	0.309	1
MT1X	0.0104317	-0.380937	0.5	0.596	1
AKR1C3	0.0104766	-0.190356	0.308	0.432	1
PCDHB16	0.0104927	-0.0909503	0.021	0.082	1
LINC01287	0.0105409	0.176348	0.068	0.023	1
PEAK1	0.0105523	0.242751	0.568	0.473	1
ZNF658	0.0105602	-0.0614005	0	0.043	1
AC139149.1	0.0105602	-0.0614005	0	0.043	1
HIST1H4C	0.0105702	0.470567	0.925	0.872	1
PRKCA	0.0105803	-0.295866	0.788	0.806	1
C4orf47	0.0105949	0.0736073	0.055	0.015	1
AL160313.1	0.0105949	0.0736073	0.055	0.015	1
PCCA-DT	0.01061	-0.130526	0.089	0.179	1
PEX5L	0.0106668	0.0699778	0.055	0.015	1
SEC22C	0.0106895	-0.178559	0.274	0.389	1
LRRC28	0.0106949	-0.179972	0.199	0.304	1
THRB	0.0108017	0.0549916	0.055	0.015	1
C6orf99	0.0108017	0.0549916	0.055	0.015	1
AC007114.1	0.0108017	0.0549916	0.055	0.015	1
AC124283.1	0.0108017	0.0549916	0.055	0.015	1
WDR91	0.0108222	0.101022	0.116	0.054	1
LINC02454	0.0108636	-0.157921	0.123	0.217	1
WNT5B	0.0109088	0.238262	0.788	0.688	1
APEH	0.0109388	0.163733	0.452	0.33	1
NXN	0.010953	0.170735	0.562	0.427	1
SUMO4	0.0109801	0.0719648	0.068	0.023	1
PSEN2	0.0110949	0.123934	0.192	0.11	1
AC018464.1	0.0112514	0.14969	0.288	0.187	1
PJA2	0.0112516	-0.159204	0.61	0.742	1
EVL	0.0113605	0.219855	0.329	0.235	1
TPD52L2	0.0114223	-0.215992	0.411	0.496	1
ORC4	0.0114824	-0.163762	0.219	0.33	1
MRPS35	0.0115282	0.187403	0.712	0.611	1
MAP3K20	0.0115359	0.183907	0.678	0.593	1
PCED1B	0.0115436	-0.23001	0.363	0.476	1
PNP	0.0115868	0.133957	0.548	0.389	1
CCDC80	0.0116415	-0.175254	0.952	0.987	1
COPS3	0.0116573	0.235755	0.637	0.583	1
ZMYND8	0.0116672	-0.121416	0.384	0.519	1
NFIB	0.0117675	0.201663	0.541	0.407	1
MRPS24	0.0118763	0.11816	1	0.992	1
RNASEH2C	0.0118768	0.155005	0.89	0.9	1
MXRA8	0.0119262	-0.250378	0.623	0.716	1
SUOX	0.0119653	-0.0691254	0.007	0.056	1
CDKN2B	0.0119908	-0.106806	0.048	0.123	1
VANGL1	0.0119989	-0.126768	0.075	0.159	1
COX7A2	0.0120268	-0.114039	1	1	1
RRM1	0.0120302	0.269197	0.582	0.476	1
AC009275.1	0.0120409	0.0940355	0.116	0.054	1
CHPF2	0.0120934	-0.129379	0.199	0.317	1
CRLS1	0.0121013	0.162466	0.418	0.304	1
ZNF426	0.0121311	-0.112913	0.055	0.13	1
SCARB2	0.0121867	-0.178764	0.534	0.673	1
ADSS	0.0122583	-0.190234	0.514	0.624	1
HSD17B4	0.0122859	-0.204214	0.342	0.45	1
MFHAS1	0.0122967	0.0943899	0.199	0.113	1
PHETA2	0.0123115	-0.0824163	0.034	0.102	1
EXO1	0.0124015	0.105771	0.178	0.097	1
PRPSAP1	0.0124333	0.140447	0.541	0.427	1
WDR34	0.0124642	0.235168	0.555	0.453	1
ZNF324	0.0124971	0.0687473	0.089	0.036	1
FGF7	0.0125087	0.188863	0.678	0.565	1
CNPPD1	0.0125971	-0.103969	0.062	0.141	1
CFAP69	0.0126592	-0.0504208	0.007	0.056	1
SPRTN	0.0126843	-0.143215	0.116	0.21	1
PYGB	0.0127011	-0.101568	0.068	0.151	1
ALAS1	0.0127268	-0.171845	0.192	0.294	1
STYK1	0.0127568	0.0870827	0.123	0.059	1
ABCD1	0.0127568	0.0870827	0.123	0.059	1
LIMS2	0.0128063	-0.128002	0.158	0.263	1
NAV1	0.0128658	-0.296286	0.678	0.726	1
FAM210A	0.0129007	0.192205	0.349	0.251	1
RFXANK	0.0129024	0.140263	0.685	0.57	1
CCND1	0.0129344	-0.135656	0.986	0.995	1
ACP2	0.0129743	0.171145	0.356	0.246	1
FBH1	0.0130663	0.128279	0.37	0.261	1
PHLPP2	0.013098	-0.128138	0.103	0.194	1
CIRBP	0.0131029	0.152244	0.822	0.785	1
CPQ	0.0131255	-0.18387	0.247	0.35	1
MAP4K5	0.0131538	-0.163762	0.452	0.558	1
TM9SF2	0.013188	-0.188159	0.349	0.468	1
SLC30A1	0.013207	-0.0578602	0	0.041	1
SLC25A35	0.013207	-0.0578602	0	0.041	1
HOXC6	0.0132094	-0.0649322	0	0.041	1
ABCA13	0.0132823	0.0405962	0.089	0.036	1
PPP2R5C	0.0133101	0.15673	0.521	0.407	1
TMEM205	0.0133588	0.208109	0.568	0.465	1
TTC14	0.0134238	0.116866	0.315	0.21	1
NUMBL	0.0134307	-0.120229	0.068	0.148	1
RFC2	0.0134344	0.240337	0.479	0.389	1
LIN9	0.0134557	0.105845	0.192	0.11	1
ARID3A	0.0134864	0.105698	0.212	0.125	1
PLPBP	0.0134963	0.158166	0.377	0.271	1
KIF9	0.0135042	-0.178949	0.253	0.361	1
ALDOC	0.0136617	0.0796918	0.096	0.041	1
ARHGAP6	0.0136701	0.0815701	0.096	0.041	1
SLC66A1	0.0137051	0.104171	0.199	0.115	1
GOLGA2	0.0137146	-0.16205	0.555	0.65	1
AL049833.1	0.0137151	0.123814	0.075	0.028	1
UBE2Q1	0.0137793	-0.195298	0.233	0.33	1
MTSS1	0.0137982	0.137211	0.473	0.343	1
CDA	0.0138389	-0.195621	0.226	0.335	1
SCAP	0.0138564	-0.105864	0.082	0.169	1
C8orf88	0.0139247	0.156373	0.582	0.445	1
RFC3	0.0139413	0.18376	0.322	0.223	1
AC079781.5	0.0139735	0.128418	0.301	0.199	1
DAAM1	0.0139868	-0.111055	0.301	0.44	1
NECTIN3	0.0140063	0.222947	0.644	0.573	1
RPRD1A	0.0140091	0.114664	0.5	0.366	1
MYCBP2	0.0141184	0.226931	0.644	0.57	1
LINC00842	0.0142213	-0.0870228	0.014	0.066	1
EPHA4	0.0142743	0.104528	0.103	0.046	1
FSCN1	0.0143139	-0.185286	0.699	0.79	1
BEX3	0.0143509	0.15453	0.993	1	1
FBXO25	0.0144133	-0.112913	0.055	0.128	1
SS18L2	0.0144217	0.203247	0.555	0.45	1
CDC6	0.0144811	0.195319	0.342	0.243	1
FOSL1	0.0144884	0.248498	0.623	0.527	1
PPM1D	0.0145689	-0.107546	0.062	0.138	1
ESM1	0.0146426	-0.319484	0.527	0.616	1
IDE	0.0146557	-0.163762	0.199	0.304	1
E2F8	0.0146904	0.0959594	0.164	0.09	1
BMPR1A	0.0147002	-0.149407	0.253	0.376	1
GTF3C6	0.014747	-0.191183	0.932	0.964	1
CARMN	0.0147697	-0.149026	0.103	0.189	1
PPIA	0.0149009	0.0858764	1	1	1
TST	0.0149151	0.194039	0.603	0.509	1
COA1	0.0149227	0.15189	0.884	0.818	1
ZNF782	0.0150412	0.0761601	0.103	0.046	1
IL32	0.0150637	-0.246655	0.541	0.627	1
NUP85	0.0151614	0.171457	0.315	0.223	1
ING1	0.0153501	0.107265	0.205	0.123	1
CNNM3	0.0154389	0.0570797	0.062	0.02	1
TTC30A	0.0154389	0.0570797	0.062	0.02	1
OSBPL8	0.0154723	-0.195384	0.712	0.816	1
DENND4C	0.0154812	0.150096	0.322	0.22	1
HOXA10	0.0154833	0.170657	0.589	0.473	1
SIK3	0.0154921	0.30346	0.514	0.43	1
MAST2	0.0155356	0.176286	0.397	0.302	1
MSN	0.0155784	-0.178262	0.979	0.982	1
YIPF4	0.0156412	-0.192617	0.438	0.527	1
PITPNM1	0.0156419	0.110729	0.192	0.113	1
ZNF585A	0.0156426	0.11716	0.363	0.251	1
C1R	0.0156618	-0.149378	0.137	0.23	1
GLS	0.0156873	-0.231095	0.555	0.65	1
PARP2	0.0156921	0.1864	0.322	0.228	1
HMCES	0.0157276	0.159363	0.301	0.21	1
ADARB1	0.015728	-0.217983	0.39	0.499	1
GCHFR	0.0158211	0.170068	0.315	0.223	1
NANS	0.0158271	-0.177837	0.966	0.972	1
GPR176	0.0158369	0.162049	0.616	0.537	1
AC007569.1	0.0158404	0.0534685	0.062	0.02	1
POLM	0.0158737	-0.14746	0.178	0.281	1
TXNDC5	0.0160226	-0.2354	0.596	0.645	1
MMP16	0.0160558	0.186735	0.267	0.179	1
YY1	0.0160568	0.203685	0.747	0.67	1
ENG	0.0160643	-0.135719	0.582	0.696	1
LRRFIP1	0.0160829	-0.188853	0.836	0.88	1
RPS19	0.016111	-0.0729987	1	1	1
VPS41	0.0163157	-0.195926	0.315	0.422	1
KLF3	0.0163544	-0.18801	0.158	0.253	1
TATDN3	0.0163573	0.186045	0.315	0.225	1
AKR1B1	0.0164434	0.194822	0.87	0.808	1
LMNA	0.0164903	-0.116732	1	1	1
PCED1A	0.0165246	-0.0914481	0.027	0.087	1
RNF44	0.0165263	-0.0543111	0	0.038	1
CDT1	0.016546	0.158705	0.356	0.253	1
MICU1	0.0165647	-0.191139	0.521	0.609	1
MMGT1	0.016662	0.162775	0.329	0.23	1
FGF5	0.016749	0.229174	0.829	0.76	1
DGUOK-AS1	0.0167512	0.0667695	0.082	0.033	1
MIGA2	0.0167512	0.0667695	0.082	0.033	1
ZNF500	0.0167512	0.0667695	0.082	0.033	1
SFMBT1	0.0168906	-0.119368	0.055	0.125	1
FOXD1	0.0168985	0.170716	0.719	0.611	1
PANK2	0.0169487	0.136855	0.616	0.491	1
HAUS1	0.0170027	0.155467	0.562	0.453	1
KLHDC3	0.0170073	0.138357	0.384	0.274	1
MTDH	0.0170319	-0.175656	0.938	0.957	1
ANK3	0.0170364	0.130944	0.137	0.072	1
INTS5	0.0170365	-0.0726805	0.062	0.138	1
ADGRG1	0.0170858	0.0940981	0.13	0.066	1
METTL18	0.0172827	0.10098	0.144	0.077	1
MFSD14C	0.0173415	0.160491	0.329	0.235	1
KANSL2	0.0173752	-0.117959	0.089	0.171	1
TRIP11	0.0173966	-0.225381	0.548	0.642	1
MT-ATP8	0.0176251	-0.164242	0.966	0.982	1
COL5A1	0.0177446	-0.206176	0.603	0.696	1
ABI3	0.0177629	-0.0767055	0.014	0.064	1
PHF5A	0.0177641	0.185572	0.555	0.46	1
C7orf25	0.0177798	0.0975858	0.164	0.092	1
NSD3	0.0177978	0.212969	0.658	0.609	1
AOX1	0.0178259	0.123119	0.205	0.125	1
ZNF460	0.0178374	-0.07325	0.014	0.064	1
SARS	0.0178592	-0.198114	0.705	0.742	1
CD82	0.0179131	0.134896	0.315	0.217	1
IGFBP3	0.0179289	-0.355781	0.288	0.386	1
TMEM141	0.0179744	-0.20412	0.747	0.813	1
ERAP2	0.017987	-0.14122	0.158	0.253	1
TTLL4	0.0181577	0.0924185	0.144	0.077	1
KLHDC2	0.0181908	-0.121814	0.349	0.481	1
SLC25A4	0.0181908	0.187866	0.596	0.529	1
CCDC151	0.0182172	0.0622779	0.041	0.01	1
GGPS1	0.0183837	-0.14545	0.205	0.312	1
SMARCA2	0.0183981	0.145708	0.397	0.294	1
PAK2	0.0184283	-0.171822	0.705	0.788	1
AC097480.1	0.0184797	0.0528792	0.041	0.01	1
CDH4	0.0184929	0.116192	0.384	0.279	1
FBRS	0.018502	0.128264	0.267	0.174	1
ICAM1	0.018513	0.284277	0.281	0.192	1
HOXC8	0.0185273	-0.0691254	0.007	0.051	1
RGS2	0.01857	-0.0656279	0.007	0.051	1
AZI2	0.0185843	0.120763	0.562	0.44	1
ARHGEF9	0.0186097	-0.146587	0.144	0.235	1
HARBI1	0.0186123	-0.062122	0.007	0.051	1
ARMC6	0.0186641	0.091659	0.281	0.182	1
HNRNPU	0.0187058	0.169953	0.911	0.859	1
AC008736.1	0.0187451	0.0434189	0.041	0.01	1
ABRAXAS1	0.0188616	0.139429	0.336	0.235	1
SMIM41	0.0188834	0.0492315	0.041	0.01	1
PTHLH	0.0188887	-0.145384	0.082	0.159	1
RHOF	0.0189075	0.0687473	0.089	0.038	1
MTFP1	0.0189174	0.181495	0.301	0.21	1
IRAK1	0.0189874	0.140717	0.418	0.309	1
LRRC17	0.0190048	-0.251989	0.459	0.583	1
ORC6	0.0190992	0.192245	0.438	0.32	1
TGFB1	0.0191103	-0.195682	0.603	0.683	1
LARP6	0.0191158	0.159801	0.925	0.923	1
NECAB1	0.0191542	0.0397711	0.041	0.01	1
ZNF740	0.0191714	-0.0929014	0.048	0.115	1
HAS2	0.0194397	0.304802	0.589	0.491	1
AC006504.5	0.0194497	-0.0841451	0.021	0.074	1
MLYCD	0.0195625	-0.0773077	0.021	0.074	1
WDR5	0.0195821	0.121411	0.301	0.205	1
C3orf14	0.0196111	0.059144	0.068	0.026	1
SLC9C1	0.0196111	0.059144	0.068	0.026	1
MEIS1	0.0196234	-0.219637	0.459	0.565	1
CHMP2B	0.0196453	-0.192481	0.63	0.729	1
ATAD2	0.0197142	0.231526	0.596	0.504	1
TFEB	0.0197321	0.112448	0.185	0.11	1
TMEM246	0.0197532	0.0735855	0.144	0.077	1
PHLDA3	0.0197566	-0.207119	0.582	0.642	1
NR2F2	0.0197598	0.165641	0.849	0.78	1
CNP	0.0198319	0.149802	0.356	0.258	1
SHFL	0.0198811	-0.132117	0.137	0.228	1
ERCC6	0.0198882	-0.130119	0.219	0.327	1
TSTA3	0.0199366	-0.16105	0.644	0.801	1
DDAH2	0.019984	-0.233711	0.336	0.419	1
RRP7A	0.0199893	0.210589	0.747	0.706	1
HECTD3	0.0200509	-0.0919391	0.034	0.095	1
PLTP	0.0200509	-0.0919391	0.034	0.095	1
HSPB11	0.0200657	0.182876	0.822	0.785	1
PPP1R7	0.0200712	0.182815	0.904	0.829	1
EPB41L2	0.0200992	0.213908	0.644	0.575	1
LTBP4	0.0201085	-0.100436	0.096	0.179	1
CCDC74B	0.0202224	-0.0885879	0.034	0.095	1
KCND2	0.0203067	0.102555	0.137	0.072	1
CDC25B	0.0203093	0.0992721	0.288	0.189	1
TIMM22	0.0203573	-0.166265	0.247	0.343	1
GPT2	0.0203947	-0.0852289	0.034	0.095	1
AKR1C2	0.0204755	-0.0779015	0.021	0.074	1
LYSMD2	0.0205483	-0.161585	0.384	0.486	1
FZD2	0.0205608	0.122056	0.377	0.271	1
ILK	0.0206008	-0.208902	0.822	0.857	1
RAD9A	0.0206721	0.0818423	0.233	0.143	1
KRI1	0.0206827	-0.114223	0.075	0.151	1
LINC01714	0.0206931	0.0196288	0.014	0	1
AL354949.1	0.0206931	0.0196288	0.014	0	1
HIST2H3D	0.0206931	0.0196288	0.014	0	1
ACBD3-AS1	0.0206931	0.0196288	0.014	0	1
AC012065.4	0.0206931	0.0196288	0.014	0	1
ABCG8	0.0206931	0.0196288	0.014	0	1
AC009948.2	0.0206931	0.0196288	0.014	0	1
KIAA2012-AS1	0.0206931	0.0196288	0.014	0	1
EFHD1	0.0206931	0.0196288	0.014	0	1
ITGA9	0.0206931	0.0196288	0.014	0	1
AC092053.2	0.0206931	0.0196288	0.014	0	1
SNTN	0.0206931	0.0196288	0.014	0	1
LSAMP-AS1	0.0206931	0.0196288	0.014	0	1
AC083906.3	0.0206931	0.0196288	0.014	0	1
CCDC39	0.0206931	0.0196288	0.014	0	1
AC114757.1	0.0206931	0.0196288	0.014	0	1
YIPF7	0.0206931	0.0196288	0.014	0	1
AC096747.1	0.0206931	0.0196288	0.014	0	1
LINC02236	0.0206931	0.0196288	0.014	0	1
PRLR	0.0206931	0.0196288	0.014	0	1
AC106818.2	0.0206931	0.0196288	0.014	0	1
PCDHA1	0.0206931	0.0196288	0.014	0	1
AC134043.2	0.0206931	0.0196288	0.014	0	1
LINC01962	0.0206931	0.0196288	0.014	0	1
AL512329.2	0.0206931	0.0196288	0.014	0	1
AL136162.1	0.0206931	0.0196288	0.014	0	1
OR2H2	0.0206931	0.0196288	0.014	0	1
DEFB133	0.0206931	0.0196288	0.014	0	1
PRSS35	0.0206931	0.0196288	0.014	0	1
AL355297.4	0.0206931	0.0196288	0.014	0	1
STEAP2-AS1	0.0206931	0.0196288	0.014	0	1
FAM131B	0.0206931	0.0196288	0.014	0	1
AC104211.1	0.0206931	0.0196288	0.014	0	1
ESRP1	0.0206931	0.0196288	0.014	0	1
AC016877.3	0.0206931	0.0196288	0.014	0	1
ANKRD20A3	0.0206931	0.0196288	0.014	0	1
GAS1RR	0.0206931	0.0196288	0.014	0	1
COL15A1	0.0206931	0.0196288	0.014	0	1
C9orf50	0.0206931	0.0196288	0.014	0	1
AKR1E2	0.0206931	0.0196288	0.014	0	1
TMEM236	0.0206931	0.0196288	0.014	0	1
AL390866.1	0.0206931	0.0196288	0.014	0	1
LINC02624	0.0206931	0.0196288	0.014	0	1
TH	0.0206931	0.0196288	0.014	0	1
AC104031.1	0.0206931	0.0196288	0.014	0	1
AL358944.1	0.0206931	0.0196288	0.014	0	1
AP003419.3	0.0206931	0.0196288	0.014	0	1
AP001267.2	0.0206931	0.0196288	0.014	0	1
KIRREL3-AS3	0.0206931	0.0196288	0.014	0	1
IAPP	0.0206931	0.0196288	0.014	0	1
AC009509.4	0.0206931	0.0196288	0.014	0	1
AC016957.2	0.0206931	0.0196288	0.014	0	1
AC034102.4	0.0206931	0.0196288	0.014	0	1
AL590807.1	0.0206931	0.0196288	0.014	0	1
AL160237.1	0.0206931	0.0196288	0.014	0	1
AC090510.1	0.0206931	0.0196288	0.014	0	1
AC104590.1	0.0206931	0.0196288	0.014	0	1
SEC14L5	0.0206931	0.0196288	0.014	0	1
LINC02192	0.0206931	0.0196288	0.014	0	1
ADGRG3	0.0206931	0.0196288	0.014	0	1
SPATA22	0.0206931	0.0196288	0.014	0	1
AC015818.2	0.0206931	0.0196288	0.014	0	1
AC024267.4	0.0206931	0.0196288	0.014	0	1
AC068025.1	0.0206931	0.0196288	0.014	0	1
EPX	0.0206931	0.0196288	0.014	0	1
RNFT1-DT	0.0206931	0.0196288	0.014	0	1
AXIN2	0.0206931	0.0196288	0.014	0	1
AC011451.1	0.0206931	0.0196288	0.014	0	1
AC008403.3	0.0206931	0.0196288	0.014	0	1
AC008750.7	0.0206931	0.0196288	0.014	0	1
AC022150.4	0.0206931	0.0196288	0.014	0	1
AL139350.1	0.0206931	0.0196288	0.014	0	1
SNAP25	0.0206931	0.0196288	0.014	0	1
AL035252.3	0.0206931	0.0196288	0.014	0	1
AL137077.2	0.0206931	0.0196288	0.014	0	1
AP001469.3	0.0206931	0.0196288	0.014	0	1
LINC01203	0.0206931	0.0196288	0.014	0	1
Z93943.1	0.0206931	0.0196288	0.014	0	1
ARHGAP4	0.0206931	0.0196288	0.014	0	1
FAM72C	0.0206933	0.029344	0.014	0	1
PLAC8	0.0206933	0.029344	0.014	0	1
AC010255.3	0.0206933	0.029344	0.014	0	1
U91328.2	0.0206933	0.029344	0.014	0	1
OR3A2	0.0206933	0.029344	0.014	0	1
CHTF8	0.0206947	-0.0507533	0	0.036	1
LINC02211	0.0207023	-0.0719698	0	0.036	1
AC087457.1	0.0207039	-0.0684553	0	0.036	1
CAMK2N2	0.020739	0.0607	0.055	0.018	1
CDCA4	0.0207436	0.166545	0.438	0.33	1
NDUFB9	0.0207773	0.140976	0.973	0.967	1
RRM2	0.0208145	0.298555	0.514	0.419	1
WIPI1	0.0208957	-0.19608	0.301	0.407	1
HNRNPA3	0.0209465	0.203064	0.966	0.967	1
LSM3	0.0211381	0.139982	0.904	0.859	1
WFS1	0.021148	0.1126	0.164	0.095	1
CCDC163	0.0211613	0.0513622	0.055	0.018	1
DCLRE1B	0.0211613	0.0513622	0.055	0.018	1
AC129803.1	0.0211613	0.0513622	0.055	0.018	1
PARM1	0.0211613	0.0513622	0.055	0.018	1
DSCR4	0.0211613	0.0513622	0.055	0.018	1
GAPDH	0.0212125	0.111095	1	1	1
RILPL1	0.0212345	-0.173494	0.288	0.389	1
PHC3	0.0213539	-0.104973	0.233	0.345	1
PGM3	0.0214029	-0.220952	0.644	0.678	1
EIF1	0.0214227	-0.06145	1	1	1
BCAP29	0.0214544	0.14634	0.918	0.893	1
CLSPN	0.0215132	0.213473	0.514	0.402	1
ZBTB48	0.0215923	-0.109314	0.048	0.113	1
HNRNPF	0.0215985	0.160476	0.89	0.882	1
RASA4	0.0216462	-0.0717141	0.027	0.084	1
C4orf19	0.0216669	-0.101967	0.068	0.143	1
NBL1	0.0216716	-0.204985	0.418	0.504	1
SNRPN	0.0217823	0.174823	0.753	0.66	1
SNHG7	0.0218687	-0.190074	0.637	0.711	1
XPO5	0.0218729	-0.122624	0.13	0.217	1
REEP5	0.0219128	-0.136896	0.932	0.923	1
BTN2A2	0.0219542	-0.120173	0.13	0.22	1
MEIS2	0.0220641	0.233128	0.719	0.629	1
P2RY6	0.0220649	-0.128534	0.041	0.102	1
TUBA1C	0.0220736	0.226562	0.986	0.977	1
JAG1	0.0221078	-0.1244	0.089	0.166	1
CEP70	0.0222235	-0.153036	0.205	0.302	1
TP53TG1	0.0222813	-0.136176	0.171	0.269	1
YY1AP1	0.0222972	-0.128786	0.123	0.21	1
RTTN	0.0223395	0.163669	0.26	0.176	1
STK16	0.0223897	-0.163762	0.192	0.286	1
MAP3K11	0.022397	0.111098	0.301	0.199	1
OSBPL6	0.0224766	0.11122	0.267	0.176	1
SCG5	0.0224984	0.1626	1	0.982	1
SGMS2	0.0225897	-0.119845	0.205	0.315	1
CHCHD3	0.0226322	0.169902	0.726	0.632	1
TYMSOS	0.0226607	0.0905549	0.116	0.059	1
SPATA2L	0.0227218	0.110995	0.158	0.09	1
MAP3K1	0.0228027	-0.0762994	0.034	0.095	1
SLC66A2	0.0228313	-0.116273	0.158	0.253	1
CBY1	0.0228653	-0.149687	0.322	0.422	1
TMEM127	0.0229062	0.0927293	0.192	0.115	1
LINC02057	0.0229559	-0.171582	0.199	0.292	1
CFAP36	0.0230384	-0.169076	0.521	0.619	1
NCALD	0.0230641	0.0758717	0.075	0.031	1
AL691420.1	0.023082	0.0814509	0.185	0.11	1
MZT2B	0.0230955	-0.127244	1	0.995	1
CSF2RB	0.0231096	-0.0656279	0.007	0.049	1
ZNF814	0.0231313	0.0888805	0.123	0.064	1
THBS3	0.0231614	0.061185	0.075	0.031	1
MAPRE2	0.0231895	-0.149956	0.158	0.251	1
TLCD1	0.0231948	0.0869149	0.267	0.174	1
MAGI1	0.0232371	-0.124469	0.616	0.721	1
CFAP97	0.0232592	-0.17907	0.473	0.581	1
NDUFA3	0.0233114	0.110169	0.877	0.862	1
DONSON	0.0233378	0.146379	0.247	0.166	1
FCGRT	0.0233625	-0.163762	0.274	0.381	1
GPAA1	0.0233751	0.183683	0.747	0.67	1
MND1	0.0234354	0.264017	0.411	0.322	1
H2AFV	0.0235071	0.170447	0.952	0.913	1
TENM2	0.0235139	0.102281	0.212	0.13	1
NT5E	0.0235495	-0.151431	0.986	0.985	1
LRP10	0.0236345	-0.142266	0.575	0.685	1
CA5B	0.023659	0.137784	0.322	0.23	1
ATOH8	0.0237003	-0.0933729	0.048	0.113	1
SLC25A3	0.0237644	0.102643	1	1	1
SUN3	0.0237674	0.046936	0.075	0.031	1
IL6	0.023862	0.511326	0.692	0.627	1
IGFN1	0.0239392	0.0375532	0.034	0.008	1
B3GAT2	0.0239392	0.0375532	0.034	0.008	1
AL157400.3	0.0239392	0.0375532	0.034	0.008	1
LINC01415	0.0239392	0.0375532	0.034	0.008	1
PCBP3	0.0239392	0.0375532	0.034	0.008	1
KLF13	0.0239541	-0.131733	0.116	0.199	1
SNHG29	0.024017	-0.146531	1	1	1
PRKDC	0.0240293	0.220422	0.938	0.923	1
ETNK1	0.0240563	0.172684	0.507	0.404	1
UBL5	0.0240575	-0.092392	1	1	1
HLA-B	0.0240726	-0.164757	0.952	0.964	1
TMEM191B	0.0240818	-0.0857597	0.041	0.102	1
SGCZ	0.0241285	0.0434189	0.034	0.008	1
CADPS2	0.024229	0.15506	0.425	0.325	1
AC067852.2	0.0243131	-0.0824163	0.041	0.102	1
PARP6	0.02432	-0.0885879	0.034	0.092	1
AC090578.1	0.0243459	0.120283	0.082	0.036	1
SRRM1	0.0243744	0.150346	0.863	0.824	1
KLHL29	0.0244244	0.129329	0.247	0.164	1
SNX15	0.0244741	-0.124646	0.103	0.182	1
TVP23C	0.024491	-0.163762	0.144	0.228	1
TFG	0.0245485	-0.187478	0.74	0.79	1
RHBDD2	0.0245662	0.145076	0.253	0.171	1
PCNX4	0.0245741	0.131694	0.521	0.402	1
HIP1	0.0245795	-0.141836	0.301	0.414	1
ALG6	0.0246904	0.0907606	0.144	0.079	1
POLD3	0.0246977	0.155497	0.356	0.258	1
ARL14EP	0.0247257	0.187173	0.445	0.368	1
MTRES1	0.0247377	0.138936	0.452	0.348	1
AC010343.3	0.0247962	-0.131172	0.192	0.292	1
HMGCS1	0.0247985	-0.0780324	0.041	0.102	1
MIR3142HG	0.0248004	-0.0779015	0.027	0.082	1
MR1	0.0248749	-0.0865944	0.075	0.151	1
TPP2	0.0249552	0.119356	0.384	0.279	1
ARPC5L	0.0250049	0.205078	0.863	0.859	1
MRPL33	0.0251402	0.146939	1	0.992	1
MAGEC2	0.0251518	0.215051	0.466	0.366	1
PGAP1	0.0251581	0.118214	0.219	0.141	1
ZDHHC12	0.02519	-0.138386	0.61	0.703	1
SUPT16H	0.0252095	0.157884	0.808	0.703	1
IFRD2	0.0254082	-0.190234	0.466	0.552	1
LINC02100	0.0254275	0.0782342	0.192	0.115	1
PHF2	0.0254302	0.0803907	0.144	0.079	1
POLR1C	0.0254394	-0.130972	0.178	0.274	1
OCIAD1	0.0254717	0.148611	0.856	0.818	1
POLA2	0.0255898	0.175444	0.295	0.21	1
PRKRIP1	0.0257145	0.125957	0.521	0.407	1
POC5	0.0257463	-0.112715	0.096	0.174	1
CTSF	0.0257764	0.0772458	0.158	0.09	1
GABARAPL1	0.0257804	-0.124348	0.384	0.494	1
CSPG4	0.0258039	-0.106944	0.11	0.192	1
MAP2K5	0.0258831	0.117612	0.247	0.164	1
FO393418.1	0.0259142	0.0719648	0.062	0.023	1
THYN1	0.0259151	0.173819	0.562	0.455	1
RABGAP1L	0.0259153	0.136434	0.568	0.458	1
AC145285.2	0.0259379	-0.0471867	0	0.033	1
TMEM225B	0.0259411	-0.0507533	0	0.033	1
AC010809.1	0.0259411	-0.0507533	0	0.033	1
PIKFYVE	0.0260306	0.0946506	0.267	0.179	1
MCFD2	0.02605	-0.143854	0.959	0.98	1
ENOX2	0.0260977	0.117231	0.288	0.199	1
AC096647.1	0.0261463	-0.0717141	0.027	0.082	1
ID1	0.0261569	-0.284069	0.959	0.972	1
FAM192A	0.0261843	0.142517	0.651	0.547	1
DUT	0.0262004	0.22767	0.932	0.893	1
PSTPIP2	0.0262126	0.134443	0.247	0.164	1
C11orf24	0.0262434	0.105998	0.37	0.266	1
TNFAIP2	0.0262757	-0.108988	0.123	0.21	1
SAMM50	0.0262887	-0.169967	0.411	0.509	1
AHDC1	0.026296	0.144596	0.253	0.174	1
RNF217	0.0263375	-0.127885	0.226	0.33	1
SCN9A	0.0263808	-0.228613	0.37	0.46	1
POP4	0.026448	0.164098	0.541	0.437	1
MAPRE3	0.0264706	-0.099222	0.082	0.156	1
FANCA	0.026485	0.166041	0.26	0.182	1
FLVCR1-DT	0.0265185	0.0627463	0.062	0.023	1
KYNU	0.0266145	0.105771	0.144	0.079	1
BLVRA	0.0266165	0.217328	0.534	0.458	1
PEPD	0.0266172	0.150228	0.808	0.749	1
PPM1N	0.0266544	0.0651982	0.082	0.036	1
IFT20	0.0266568	-0.176176	0.527	0.632	1
ALG2	0.0267964	-0.12845	0.26	0.366	1
NIPBL	0.0268867	-0.161919	0.486	0.573	1
NFX1	0.0269086	-0.178949	0.26	0.35	1
TMED7	0.0269393	0.168434	0.582	0.496	1
PVT1	0.0269505	0.146297	0.671	0.598	1
AC108067.1	0.0269719	-0.0801528	0.014	0.059	1
CRYZL1	0.0270247	0.153211	0.37	0.281	1
STRA6	0.0270853	-0.07325	0.014	0.059	1
DHX34	0.0270927	-0.130733	0.103	0.179	1
ZNF774	0.0271345	0.0534685	0.062	0.023	1
AC023043.1	0.0272299	-0.092922	0.082	0.156	1
SRGAP2	0.0272494	0.114838	0.322	0.23	1
PLSCR3	0.0272513	-0.193229	0.377	0.445	1
CCBE1	0.0272793	0.282088	0.733	0.66	1
EMILIN2	0.027312	-0.0663139	0.014	0.059	1
ESCO2	0.0273952	0.16294	0.295	0.205	1
DOCK4	0.0274151	0.214749	0.363	0.279	1
FANCB	0.0274184	0.192759	0.253	0.179	1
ZDHHC17	0.0275066	0.113347	0.336	0.24	1
BAZ2A	0.0275508	-0.171624	0.212	0.302	1
DYNC2LI1	0.0275683	-0.14122	0.164	0.251	1
IREB2	0.0275836	-0.124993	0.178	0.271	1
HK1	0.0275974	0.219566	0.623	0.57	1
C8orf48	0.0276098	0.0717258	0.13	0.069	1
AP001347.1	0.0276859	0.134976	0.164	0.097	1
MGLL	0.027786	0.142484	0.829	0.772	1
SPANXB1	0.0278103	0.247784	0.397	0.292	1
TXNDC17	0.027872	0.114769	1	0.997	1
GMPR	0.028097	-0.106806	0.062	0.128	1
TNNT1	0.0281246	-0.230682	0.644	0.693	1
ZNF415	0.0281933	-0.0990566	0.041	0.1	1
SERP1	0.028221	-0.105402	0.993	1	1
GSTCD	0.0282505	-0.126511	0.13	0.212	1
TTLL5	0.0283124	0.143761	0.233	0.153	1
IRS1	0.028328	0.127139	0.411	0.304	1
NUDT11	0.0283625	0.0651982	0.089	0.041	1
SELENOK	0.0283683	0.159672	0.979	0.941	1
UBE2D3	0.0283986	0.132592	0.973	0.949	1
KDM5B	0.0284147	-0.156109	0.425	0.54	1
CKAP4	0.0284606	-0.165679	0.952	0.985	1
DMAC1	0.028569	-0.149912	0.678	0.739	1
TMEM150A	0.028582	-0.0933729	0.048	0.11	1
AL359764.3	0.0286956	-0.0726144	0.007	0.046	1
ZNF155	0.0287176	-0.0952825	0.034	0.09	1
KCNMB2-AS1	0.0288306	-0.0726144	0.007	0.046	1
LACTB	0.0288431	0.211538	0.726	0.655	1
SAP25	0.0288638	0.0412195	0.027	0.005	1
AC091153.3	0.0288638	0.0412195	0.027	0.005	1
CASS4	0.0288638	0.0412195	0.027	0.005	1
NAGS	0.0288976	-0.0586075	0.007	0.046	1
IKZF2	0.0289234	0.0922517	0.103	0.051	1
AMY2B	0.0289842	0.0455929	0.048	0.015	1
AC022137.4	0.0289842	0.0455929	0.048	0.015	1
AL117335.1	0.0289842	0.0455929	0.048	0.015	1
HMGA2	0.0289845	0.226541	0.945	0.903	1
OSBPL3	0.0289932	-0.147995	0.192	0.289	1
E2F2	0.0291149	0.0316334	0.027	0.005	1
TCTEX1D4	0.0291149	0.0316334	0.027	0.005	1
WNT9A	0.0291149	0.0316334	0.027	0.005	1
TACR1	0.0291149	0.0316334	0.027	0.005	1
AC062015.1	0.0291149	0.0316334	0.027	0.005	1
PURG	0.0291149	0.0316334	0.027	0.005	1
AC137894.3	0.0291149	0.0316334	0.027	0.005	1
PLBD1	0.0291149	0.0316334	0.027	0.005	1
AC022364.1	0.0291149	0.0316334	0.027	0.005	1
AL161891.1	0.0291149	0.0316334	0.027	0.005	1
AP001437.2	0.0291149	0.0316334	0.027	0.005	1
AP001062.1	0.0291149	0.0316334	0.027	0.005	1
PNPLA4	0.0291149	0.0316334	0.027	0.005	1
LARP1	0.0291192	0.149008	0.644	0.524	1
PHETA1	0.0291283	0.0616579	0.089	0.041	1
SPP1	0.029168	0.0627463	0.048	0.015	1
MPPE1	0.029171	-0.110975	0.123	0.207	1
ABCA5	0.0291817	-0.1175	0.123	0.207	1
ORMDL1	0.0291835	0.133535	0.795	0.711	1
ITCH	0.0291938	-0.194957	0.438	0.55	1
ACADSB	0.0292044	-0.0885879	0.034	0.09	1
KRT7	0.0292229	-0.309458	0.534	0.606	1
CCDC107	0.0292464	0.134319	0.884	0.859	1
YKT6	0.0293575	-0.139177	0.349	0.455	1
ZNF746	0.0293633	-0.0914481	0.027	0.079	1
CNTNAP3	0.0295734	-0.0948149	0.027	0.079	1
AC007906.2	0.0295974	0.0383431	0.048	0.015	1
BRIX1	0.0296003	0.17495	0.623	0.524	1
AL603840.1	0.029627	0.0279671	0.027	0.005	1
AC114485.1	0.029627	0.0279671	0.027	0.005	1
GOSR1	0.0296586	-0.161642	0.425	0.519	1
APCDD1L-DT	0.0297467	-0.294801	0.568	0.627	1
PHACTR4	0.0298328	0.174285	0.596	0.496	1
CHST7	0.029838	0.13482	0.24	0.161	1
MED27	0.0298459	0.131694	0.411	0.317	1
AXL	0.0300723	0.157043	0.774	0.714	1
PURB	0.0301017	0.167885	0.336	0.253	1
PUS1	0.0301382	-0.11454	0.089	0.161	1
ATG4C	0.0301384	-0.123898	0.089	0.161	1
MEF2B	0.0302082	-0.0744949	0.027	0.079	1
RNF10	0.0302383	-0.15719	0.356	0.458	1
NDUFAB1	0.0303057	-0.105479	1	0.992	1
BMP6	0.0303075	-0.0477542	0.007	0.046	1
PRPF18	0.0304449	-0.111566	0.267	0.379	1
ECT2	0.0305514	0.124989	0.493	0.384	1
SELENOW	0.0305558	-0.11858	0.993	0.982	1
BAX	0.0305649	0.12715	0.986	0.982	1
AC068633.1	0.0305804	-0.176119	0.048	0.107	1
ZNF587B	0.0306536	-0.0762994	0.041	0.1	1
EYA4	0.0307704	0.101001	0.11	0.056	1
CCL2	0.0309736	-0.401922	0.438	0.532	1
LRMP	0.0309811	0.0638782	0.021	0.003	1
KCNK2	0.031005	-0.12312	0.055	0.118	1
CHST2	0.0310344	0.0799304	0.11	0.056	1
ZNF174	0.0310344	0.0799304	0.11	0.056	1
LYRM1	0.0311411	0.143666	0.274	0.192	1
TLX2	0.0311444	0.0448951	0.021	0.003	1
AUXG01000058.1	0.0311444	0.0448951	0.021	0.003	1
TFF1	0.0311444	0.0448951	0.021	0.003	1
CPD	0.0311789	-0.128997	0.13	0.212	1
SLC30A7	0.0312541	0.152711	0.384	0.292	1
LINC01776	0.0312796	0.131694	0.178	0.11	1
VWA5B1	0.031308	0.0256589	0.021	0.003	1
AL139289.2	0.031308	0.0256589	0.021	0.003	1
AC008074.2	0.031308	0.0256589	0.021	0.003	1
LINC02831	0.031308	0.0256589	0.021	0.003	1
ZBTB20-AS1	0.031308	0.0256589	0.021	0.003	1
KIAA1257	0.031308	0.0256589	0.021	0.003	1
AC131235.2	0.031308	0.0256589	0.021	0.003	1
AF213884.3	0.031308	0.0256589	0.021	0.003	1
SH3TC2-DT	0.031308	0.0256589	0.021	0.003	1
NDST1-AS1	0.031308	0.0256589	0.021	0.003	1
AC139795.3	0.031308	0.0256589	0.021	0.003	1
LINC01011	0.031308	0.0256589	0.021	0.003	1
AL355353.1	0.031308	0.0256589	0.021	0.003	1
AL357146.1	0.031308	0.0256589	0.021	0.003	1
CLEC2L	0.031308	0.0256589	0.021	0.003	1
AC104561.1	0.031308	0.0256589	0.021	0.003	1
SNX32	0.031308	0.0256589	0.021	0.003	1
AP001107.2	0.031308	0.0256589	0.021	0.003	1
PCF11-AS1	0.031308	0.0256589	0.021	0.003	1
LINC00327	0.031308	0.0256589	0.021	0.003	1
PAN3-AS1	0.031308	0.0256589	0.021	0.003	1
APBA2	0.031308	0.0256589	0.021	0.003	1
AC022558.2	0.031308	0.0256589	0.021	0.003	1
CLDN6	0.031308	0.0256589	0.021	0.003	1
AC108134.4	0.031308	0.0256589	0.021	0.003	1
AC007728.2	0.031308	0.0256589	0.021	0.003	1
AC106037.3	0.031308	0.0256589	0.021	0.003	1
AC009716.1	0.031308	0.0256589	0.021	0.003	1
AL132655.2	0.031308	0.0256589	0.021	0.003	1
TNFRSF13C	0.031308	0.0256589	0.021	0.003	1
TRAPPC1	0.0313453	-0.120275	0.986	0.985	1
THOC1	0.031357	0.144805	0.322	0.233	1
ZNF431	0.0313601	0.113691	0.212	0.138	1
COPZ2	0.0314508	0.141092	0.801	0.714	1
IQCH	0.0314683	0.124807	0.123	0.066	1
LINC01419	0.0314746	0.165471	0.021	0.003	1
SPAG16	0.0315103	0.187837	0.534	0.44	1
CEP170	0.0315366	0.209541	0.753	0.721	1
THOC3	0.0316344	0.137784	0.322	0.235	1
NRN1	0.0316405	0.0316334	0.021	0.003	1
AC016769.5	0.0316405	0.0316334	0.021	0.003	1
TRIM62	0.0316674	-0.0970912	0.055	0.118	1
WDFY3	0.0316836	-0.115553	0.308	0.414	1
ZNF706	0.0317891	0.129646	0.932	0.913	1
AC009495.1	0.0318069	0.0219833	0.021	0.003	1
USE1	0.0318759	-0.149407	0.288	0.384	1
LRRK2	0.0319339	0.0841653	0.164	0.097	1
TAF9B	0.0319416	0.116346	0.233	0.153	1
KIAA1522	0.031954	-0.0845604	0.055	0.118	1
KIF27	0.0319782	0.104171	0.185	0.115	1
PIAS4	0.0319936	-0.107546	0.068	0.136	1
TMEM171	0.0320518	0.0555508	0.068	0.028	1
PATZ1	0.0320518	0.0555508	0.068	0.028	1
HCFC2	0.032089	-0.116359	0.123	0.202	1
VASN	0.0321715	-0.208094	0.459	0.524	1
PCLAF	0.0323524	0.279295	0.719	0.634	1
RAD17	0.0323656	-0.121092	0.205	0.299	1
ERBB2	0.0324092	-0.113031	0.11	0.187	1
FGF2	0.0324641	0.352487	0.973	0.977	1
FSD1	0.0324769	0.155163	0.274	0.197	1
NEK6	0.0325418	0.173933	0.411	0.327	1
LRIG1	0.0325431	-0.103575	0.062	0.125	1
AC027018.1	0.0325498	-0.0471867	0	0.031	1
AL450384.2	0.0325498	-0.0471867	0	0.031	1
MCOLN2	0.0325526	-0.0507533	0	0.031	1
SYN3	0.0325526	-0.0507533	0	0.031	1
GULP1	0.0326874	-0.156531	0.267	0.363	1
TRIT1	0.0327442	-0.0950495	0.151	0.24	1
MFSD2A	0.0327476	-0.0895962	0.048	0.107	1
LAPTM4A	0.0328195	0.176801	0.986	0.982	1
KLC1	0.0328242	-0.163762	0.644	0.685	1
RPL39L	0.0329026	0.202992	0.726	0.65	1
MYO10	0.0329512	-0.126133	0.705	0.813	1
TUBB	0.0329586	0.158433	1	0.997	1
ZNF664	0.0330504	0.0808295	0.164	0.097	1
CORO1A	0.0330723	-0.107909	0.075	0.143	1
ZNF529-AS1	0.0330769	0.0838053	0.13	0.072	1
STPG1	0.0331354	0.0668507	0.199	0.123	1
ABLIM1	0.0332078	-0.0767055	0.014	0.056	1
TCIM	0.033299	0.110995	0.11	0.056	1
MEG8	0.0335315	-0.191139	0.418	0.529	1
CLCN4	0.0335865	0.048391	0.068	0.028	1
CYP4V2	0.0337661	-0.0628334	0.014	0.056	1
KLHL26	0.0337661	-0.0628334	0.014	0.056	1
STK17B	0.0338182	0.142751	0.514	0.412	1
HIPK2	0.0339878	0.181862	0.5	0.412	1
ARPC5	0.0340008	-0.115084	1	1	1
ZFPM1	0.0340082	0.170933	0.39	0.304	1
TTC23	0.0340615	-0.111069	0.082	0.151	1
TEX30	0.0341169	0.191954	0.493	0.402	1
VEPH1	0.0341782	-0.178759	0.616	0.683	1
PPIC	0.0342209	-0.110935	0.781	0.867	1
METTL9	0.0342552	0.174447	0.808	0.78	1
TMEM121	0.0343125	-0.113577	0.068	0.133	1
ARPC1B	0.0344187	0.126558	1	0.992	1
ETF1	0.0345019	0.158166	0.658	0.558	1
HS2ST1	0.034532	0.159306	0.315	0.228	1
RCBTB2	0.0345549	-0.0824163	0.041	0.097	1
CARD6	0.034564	0.0751405	0.13	0.072	1
SIGIRR	0.0346248	-0.111103	0.171	0.266	1
GPR161	0.034648	0.0977133	0.253	0.171	1
MIR100HG	0.0348634	-0.222424	0.945	0.944	1
OST4	0.0349299	-0.0954453	1	1	1
SRSF2	0.0350183	0.153095	0.884	0.854	1
SESTD1	0.0351259	0.117808	0.445	0.343	1
SLC16A1	0.0351411	0.152711	0.336	0.261	1
SUCLG1	0.0351504	-0.168069	0.801	0.857	1
BOLA2B	0.0351829	-0.147821	0.212	0.299	1
PDCD1LG2	0.0351846	0.154239	0.342	0.256	1
CCDC14	0.0352877	0.158166	0.356	0.269	1
PARK7	0.0353389	-0.0537746	1	1	1
PCBD1	0.0353661	0.160182	0.699	0.639	1
PMM2	0.0353747	-0.159538	0.404	0.501	1
GAS5	0.0353845	-0.228613	0.726	0.829	1
STIL	0.0355886	0.163812	0.212	0.143	1
BRIP1	0.0356359	0.264179	0.418	0.332	1
RAB12	0.0356872	0.085151	0.233	0.153	1
KAT5	0.0356906	0.146675	0.267	0.189	1
MAPK10	0.0357133	-0.107546	0.062	0.125	1
PXMP2	0.0357656	0.180736	0.589	0.506	1
CTDSPL	0.0357985	-0.102362	0.24	0.348	1
TPI1	0.0358291	0.0729335	1	1	1
MRPL42	0.0358381	-0.160453	0.548	0.657	1
IER5L	0.0358937	-0.234445	0.596	0.642	1
CCPG1	0.035929	-0.157336	0.377	0.478	1
RBM38	0.035939	0.0576095	0.075	0.033	1
ERO1A	0.0359543	0.152231	0.575	0.483	1
ATP6V0C	0.035976	0.11647	0.986	0.98	1
HNRNPK	0.0360051	0.114335	0.986	0.982	1
ALKBH8	0.0360312	-0.0888002	0.075	0.143	1
HIST1H3G	0.0360793	0.0720507	0.13	0.072	1
AC026471.1	0.0361453	-0.0515528	0.007	0.043	1
PPP2R5E	0.036212	0.151623	0.548	0.44	1
NNT-AS1	0.0362273	0.13135	0.24	0.161	1
DDT	0.036275	0.0982843	1	1	1
UPF3A	0.0363036	0.182601	0.733	0.67	1
CTSO	0.0363276	-0.0635348	0.021	0.066	1
PSMA7	0.0363695	-0.0822061	1	1	1
RGL1	0.0363897	0.130636	0.219	0.146	1
PSEN1	0.0364442	-0.109004	0.164	0.253	1
PRPF8	0.0366134	0.162888	0.719	0.629	1
MLH1	0.0366162	0.129434	0.322	0.238	1
FNIP2	0.0366271	-0.109637	0.144	0.228	1
MRPL34	0.0366292	-0.150055	0.863	0.877	1
GNB2	0.0366454	0.12164	0.938	0.895	1
NDUFA10	0.0366904	-0.146021	0.575	0.696	1
NIF3L1	0.0367325	-0.114853	0.192	0.279	1
ZNF574	0.0367405	-0.0710803	0.027	0.077	1
MFSD10	0.0367774	-0.177059	0.705	0.78	1
METTL22	0.0368815	-0.0887252	0.144	0.23	1
LMBRD1	0.0370491	-0.140046	0.212	0.302	1
ABCB10	0.0372154	0.105771	0.185	0.115	1
GLA	0.0372215	0.117419	0.411	0.317	1
YEATS4	0.0372236	0.114813	0.384	0.289	1
TCF12	0.0372997	-0.204448	0.575	0.642	1
AC090791.1	0.0373099	0.161252	0.219	0.148	1
CDK1	0.0374418	0.106908	0.445	0.327	1
NBPF9	0.0374516	-0.0662458	0.041	0.097	1
SNRNP70	0.0375333	0.162739	0.788	0.703	1
DAPK1	0.0375383	0.119545	0.137	0.079	1
JPH2	0.0375403	-0.099489	0.048	0.105	1
SULF1	0.0375609	-0.392531	0.329	0.414	1
NBEAL1	0.0375884	-0.165461	0.562	0.637	1
TRPM2	0.0376091	0.0477418	0.055	0.02	1
FAM111B	0.0376201	0.168557	0.26	0.182	1
TOB2	0.0376987	0.18746	0.253	0.184	1
MED13	0.0377911	0.154856	0.514	0.404	1
MTG1	0.0378402	-0.144254	0.514	0.624	1
SLC35F6	0.0378508	0.0925775	0.164	0.1	1
DLX2	0.0381073	-0.177515	0.171	0.248	1
CIZ1	0.0381329	-0.138671	0.178	0.261	1
ATG7	0.0381457	0.147471	0.575	0.471	1
UBE2B	0.0381666	-0.109127	0.966	0.954	1
PLPP4	0.0381899	-0.120694	0.144	0.223	1
ABCB7	0.0382396	-0.11665	0.123	0.199	1
SLC35A1	0.0383147	-0.104989	0.123	0.202	1
AC009961.1	0.0384015	0.0441306	0.055	0.02	1
TFIP11	0.0384484	-0.0729968	0.096	0.169	1
PANX1	0.038537	0.0808295	0.158	0.095	1
DTNA	0.0385726	0.106242	0.103	0.054	1
HMG20A	0.0385904	0.0912348	0.212	0.138	1
CALCOCO1	0.0386301	-0.113344	0.123	0.199	1
CCR10	0.0386402	0.0975245	0.103	0.054	1
SRGN	0.0386703	-0.124508	1	0.997	1
VDAC3	0.0386912	0.163285	0.822	0.79	1
TFDP2	0.038697	-0.156776	0.295	0.391	1
SNX8	0.0386975	0.0964735	0.342	0.246	1
CSNK1A1	0.0388109	0.136169	0.849	0.824	1
VPS13C	0.0388565	-0.172937	0.342	0.432	1
TCEAL7	0.0388915	0.134579	0.548	0.455	1
TTC17	0.038969	-0.17203	0.384	0.473	1
CDCA5	0.0390243	0.132673	0.267	0.187	1
AL035446.1	0.0390511	0.0492315	0.041	0.013	1
AURKC	0.0390511	0.0492315	0.041	0.013	1
IRS2	0.0390614	0.0904483	0.089	0.043	1
SMDT1	0.0391879	-0.122755	0.842	0.903	1
LINC01128	0.0392343	0.112299	0.185	0.118	1
MCM4	0.0393111	0.148914	0.438	0.353	1
C12orf75	0.0393284	-0.129778	1	1	1
FAM210B	0.0393293	-0.102046	0.267	0.363	1
LINC01278	0.0395004	0.120031	0.295	0.21	1
PDHB	0.0395483	-0.176436	0.719	0.77	1
PPFIA4	0.0396559	0.0397711	0.041	0.013	1
ZNF117	0.0396559	0.0397711	0.041	0.013	1
ENPP2	0.0396559	0.0397711	0.041	0.013	1
TMEM202-AS1	0.0396559	0.0397711	0.041	0.013	1
AL022238.2	0.0396559	0.0397711	0.041	0.013	1
TEDC1	0.0399339	0.133286	0.295	0.21	1
DGCR6L	0.0399887	0.168706	0.685	0.606	1
GRK5	0.0400054	-0.0694349	0.068	0.133	1
TUSC2	0.0400328	-0.156485	0.527	0.614	1
PLSCR1	0.0402565	0.162837	0.397	0.315	1
ACTL6A	0.0402568	0.173273	0.623	0.552	1
FAM160B2	0.040329	0.0888805	0.123	0.069	1
AC010809.2	0.0404	0.0361326	0.041	0.013	1
SETD1A	0.0404161	0.100922	0.171	0.107	1
DAB2	0.0404258	0.326589	0.705	0.665	1
BASP1	0.0404712	0.134761	0.959	0.941	1
ZNRF1	0.0405018	0.142423	0.692	0.591	1
SYTL4	0.0406757	-0.0813001	0.055	0.115	1
AC010618.3	0.0408337	0.0823983	0.151	0.09	1
SCUBE2	0.0408966	-0.0400269	0	0.028	1
ZNF132	0.0409002	-0.0436112	0	0.028	1
LOXL2	0.0409078	0.165529	0.938	0.954	1
LRRC49	0.0409099	-0.189602	0.13	0.205	1
HSCB	0.0409195	-0.103953	0.253	0.358	1
RPA3	0.0410764	0.144239	0.911	0.857	1
NXPH4	0.0410916	-0.0824163	0.041	0.095	1
NQO2	0.0412283	0.189692	0.555	0.509	1
TIMP2	0.041231	-0.0622971	0.863	0.898	1
CMTM6	0.0412907	-0.171657	0.486	0.552	1
EEF1B2	0.041336	0.0824478	1	1	1
ZC3H14	0.0413394	0.145215	0.541	0.45	1
TMEM38A	0.0413782	-0.0697861	0.014	0.054	1
SRP14-AS1	0.041491	-0.0850789	0.062	0.123	1
BBS2	0.0415011	0.0854332	0.123	0.069	1
NCOR2	0.0415687	0.189254	0.658	0.588	1
CSGALNACT1	0.0416344	0.245961	0.39	0.32	1
EIF1AD	0.0417299	-0.123843	0.164	0.243	1
AMFR	0.0418596	-0.129815	0.158	0.238	1
CD151	0.041876	0.103446	1	0.997	1
TSR3	0.0420366	-0.115399	0.678	0.785	1
KIAA0895	0.0421051	0.0581262	0.089	0.043	1
DNMT3A	0.0421117	-0.0702364	0.048	0.105	1
INTS10	0.0421637	0.150512	0.438	0.361	1
SHCBP1	0.0421994	0.115892	0.37	0.276	1
CIB2	0.0422651	-0.0852289	0.034	0.084	1
ZNF85	0.0423251	0.121395	0.219	0.148	1
SCN8A	0.0425532	0.167082	0.466	0.379	1
ITGA3	0.0425942	-0.163762	0.671	0.721	1
EPHX4	0.042612	-0.081862	0.034	0.084	1
OSBPL11	0.0427471	0.143666	0.274	0.199	1
TTF1	0.0428206	0.134206	0.336	0.253	1
FBXL5	0.0428288	0.141398	0.555	0.453	1
ZNF365	0.043011	0.0799304	0.103	0.054	1
GNL3	0.0430513	-0.169156	0.473	0.568	1
CNN3	0.0430556	0.174912	0.904	0.859	1
BCHE	0.0430798	-0.0735645	0.041	0.095	1
DIO2	0.0431647	-0.0277331	0.034	0.087	1
NPDC1	0.0431775	0.161517	0.801	0.737	1
MAGED1	0.0432194	-0.168141	0.623	0.731	1
RPS25	0.0432963	-0.0848887	1	1	1
C15orf39	0.0432995	0.0656166	0.096	0.049	1
SSBP3	0.0433315	-0.171257	0.274	0.353	1
GRB10	0.0433602	-0.108988	0.144	0.223	1
SAMD12-AS1	0.0433971	0.0992721	0.116	0.064	1
C3orf52	0.0434176	-0.0967836	0.13	0.207	1
CNBD2	0.0434788	-0.0738768	0.021	0.064	1
ZNF232	0.0435071	0.0656166	0.103	0.054	1
EPS8	0.0436067	-0.0810104	0.514	0.642	1
ERLIN1	0.0436117	0.125744	0.479	0.381	1
NUP160	0.043695	0.122542	0.295	0.215	1
ZNF641	0.0438209	-0.0461318	0.014	0.054	1
POMT1	0.0438491	0.0713931	0.123	0.069	1
MAP3K12	0.0438871	-0.0801975	0.055	0.113	1
BARD1	0.0439074	0.157289	0.486	0.381	1
PGBD1	0.0439657	-0.110323	0.116	0.189	1
STK11IP	0.0439703	-0.0704377	0.021	0.064	1
SLC25A43	0.0440989	-0.150777	0.247	0.332	1
DLK2	0.0442166	-0.0635348	0.021	0.064	1
ZNF433	0.0442166	-0.0704377	0.021	0.064	1
TUBB4B	0.0442263	0.239673	0.993	0.992	1
GPR89A	0.0444123	-0.0662458	0.041	0.095	1
ZBTB33	0.0444634	-0.060071	0.021	0.064	1
USP7	0.0444682	-0.182683	0.322	0.399	1
EML3	0.0445169	0.0732769	0.123	0.069	1
CEP192	0.0446772	0.127893	0.384	0.297	1
HLA-DPA1	0.0447045	-0.0760949	0.007	0.041	1
PKIB	0.0447464	0.115292	0.068	0.031	1
ORC1	0.0447582	0.0713931	0.116	0.064	1
SRP72	0.044814	0.113658	0.795	0.701	1
TUBB2A	0.0448987	-0.126811	0.479	0.588	1
MIR3681HG	0.0449154	-0.0550845	0.007	0.041	1
OGFOD3	0.0449695	0.12531	0.493	0.394	1
ENDOD1	0.0449915	-0.110651	0.123	0.197	1
DENND2C	0.0451245	-0.0480124	0.007	0.041	1
ZBED3	0.0451245	-0.0480124	0.007	0.041	1
PNPLA7	0.0451245	-0.0480124	0.007	0.041	1
POLR3D	0.0451381	-0.0838919	0.363	0.476	1
MARK4	0.0451456	-0.118049	0.144	0.22	1
PNPO	0.0451593	0.091659	0.267	0.187	1
EIF4A3	0.0453165	0.176544	0.767	0.693	1
FCMR	0.0453642	0.046273	0.062	0.026	1
MID2	0.0453642	0.046273	0.062	0.026	1
NDUFB5	0.045468	0.141634	0.849	0.816	1
PNRC1	0.04551	-0.14584	0.295	0.386	1
PTTG1IP	0.04553	-0.182973	0.726	0.772	1
FBXO33	0.0455366	0.100885	0.199	0.13	1
CCDC61	0.0455953	-0.0915339	0.075	0.138	1
AC010735.2	0.0455973	0.100816	0.226	0.151	1
MET	0.0456235	-0.193728	0.507	0.591	1
CDC42EP2	0.0456622	-0.107876	0.24	0.34	1
ZNF3	0.0458349	0.0551496	0.103	0.054	1
SSBP2	0.0460968	0.185572	0.329	0.253	1
ARG2	0.0462165	0.132825	0.137	0.082	1
ILRUN	0.0462809	0.123846	0.418	0.327	1
PEX10	0.0463211	0.0711428	0.301	0.212	1
NEAT1	0.0464766	-0.151125	0.911	0.923	1
SIX4	0.0465277	-0.0493324	0.034	0.084	1
IQSEC1	0.04666	0.0502438	0.103	0.054	1
BVES	0.0466714	-0.0796351	0.048	0.102	1
RAD51AP1	0.0467975	0.106468	0.253	0.176	1
AC040970.1	0.0468208	0.0849169	0.068	0.031	1
CEPT1	0.0468411	-0.08494	0.096	0.166	1
CCDC50	0.0468437	-0.166008	0.801	0.834	1
CD24	0.0469217	-0.142961	0.068	0.13	1
CTH	0.046934	-0.0320566	0.007	0.041	1
XRN1	0.0469425	0.118915	0.582	0.483	1
TCF7L1	0.04696	0.169661	0.438	0.361	1
CAPNS1	0.0469613	0.123274	0.863	0.849	1
CLHC1	0.0470042	0.113378	0.226	0.156	1
ITGAE	0.047047	-0.122556	0.815	0.887	1
FTO	0.0470833	0.146969	0.473	0.386	1
CDK5	0.047164	-0.139844	0.39	0.483	1
GAGE1	0.0471661	-0.0780324	0.027	0.074	1
TRAF7	0.0472506	-0.133036	0.178	0.256	1
NAGK	0.0472568	-0.167387	0.548	0.604	1
MDH2	0.047264	-0.117917	0.986	0.987	1
KTN1	0.0474248	-0.125057	0.993	0.995	1
TLCD5	0.0474844	0.150466	0.342	0.261	1
CMPK1	0.0475142	-0.156229	0.63	0.714	1
JPX	0.0475797	0.108893	0.726	0.614	1
HAX1	0.0476918	-0.147084	0.808	0.864	1
TET1	0.047768	-0.153548	0.24	0.322	1
FNDC3B	0.0477805	-0.157629	0.836	0.88	1
CORO1C	0.0478457	0.133871	0.808	0.703	1
RAB27B	0.0478668	0.116689	0.274	0.194	1
EEF1E1	0.0478696	0.151982	0.856	0.803	1
SDHAF2	0.0478706	-0.135334	0.288	0.381	1
HSBP1	0.0479123	0.0782904	0.993	0.997	1
AC087280.2	0.0480751	-0.0933729	0.089	0.156	1
NEDD9	0.048092	-0.0801975	0.048	0.102	1
ARL6IP6	0.0480933	0.194023	0.466	0.399	1
SUV39H2	0.0482127	0.077003	0.219	0.146	1
SERGEF	0.0482464	-0.112377	0.205	0.289	1
ACAA1	0.0483813	-0.114615	0.336	0.427	1
HDAC5	0.0484398	-0.0751236	0.158	0.243	1
CD81	0.0484793	-0.0922335	1	1	1
CYHR1	0.0485844	0.150824	0.452	0.368	1
SSR2	0.0486119	-0.131954	0.993	0.995	1
RNF4	0.0487551	0.0799808	0.384	0.279	1
ISOC2	0.0487611	-0.115951	0.63	0.703	1
QDPR	0.0487997	0.105946	0.568	0.468	1
BAZ1A	0.0488227	0.14355	0.61	0.547	1
CCDC92	0.0488754	-0.171142	0.247	0.33	1
CHCHD7	0.049028	0.172521	0.61	0.529	1
LINC01444	0.0490603	-0.140679	0.103	0.171	1
MTCH2	0.0490918	-0.163762	0.692	0.785	1
VAMP5	0.0491326	0.132361	0.904	0.872	1
VPS29	0.0491335	0.14219	0.966	0.954	1
GLE1	0.0491405	-0.0880526	0.096	0.164	1
KCNQ1OT1	0.0491502	0.08615	0.267	0.189	1
FAM24B	0.0491674	0.162888	0.267	0.192	1
AL138828.1	0.0495155	0.0310179	0.103	0.054	1
RAMP2	0.0496977	-0.0952825	0.034	0.082	1
SDCBP2-AS1	0.0497275	-0.0608986	0.048	0.102	1
SAFB	0.049886	-0.143103	0.315	0.407	1
CPSF6	0.0499084	0.148767	0.514	0.427	1
NUMB	0.0501409	0.152552	0.664	0.606	1
FASTK	0.0502049	0.111032	0.548	0.442	1
SPCS1	0.0503159	-0.114115	0.993	0.992	1
PYCR1	0.0504211	-0.119946	0.404	0.486	1
PEX19	0.0504938	-0.0843278	0.137	0.212	1
SC5D	0.0505135	-0.0896154	0.151	0.233	1
SLC16A2	0.0506411	0.189768	0.411	0.327	1
TRAM1L1	0.0506514	0.048391	0.068	0.031	1
TMEM59	0.050766	-0.151458	0.945	0.957	1
SNCA	0.0507765	0.0805449	0.308	0.22	1
SP4	0.0508013	0.0581474	0.13	0.074	1
STXBP4	0.05083	0.0829703	0.199	0.13	1
PSMD4	0.0508495	0.124825	0.945	0.923	1
TBL1X	0.050959	0.0955618	0.432	0.332	1
TXLNA	0.0510227	-0.138592	0.336	0.427	1
RNF169	0.0510705	-0.0822324	0.199	0.286	1
TMOD1	0.0511437	-0.0938382	0.055	0.11	1
ZNF211	0.0513159	0.0513622	0.048	0.018	1
SMC2	0.0513286	0.180863	0.568	0.478	1
RPL11	0.0513455	-0.0599356	1	1	1
WDYHV1	0.051356	0.0825612	0.37	0.276	1
ASB8	0.051407	0.108042	0.295	0.215	1
COG3	0.0514305	-0.0966481	0.158	0.238	1
FANCI	0.0514512	0.17897	0.336	0.263	1
CNPY2	0.0514756	0.118466	0.986	0.964	1
SLC37A2	0.0514801	-0.0364336	0	0.026	1
TCTE3	0.0514838	-0.0400269	0	0.026	1
AQP3	0.0514838	-0.0400269	0	0.026	1
RALGPS1	0.0514838	-0.0436112	0	0.026	1
AL359555.4	0.0514838	-0.0400269	0	0.026	1
MYOZ1	0.0514867	-0.0436112	0	0.026	1
UNC5C	0.0514868	-0.0507533	0	0.026	1
SAMD3	0.0516056	-0.270213	0.445	0.506	1
TNIK	0.0516064	-0.120509	0.082	0.143	1
CLPTM1L	0.0516385	0.114539	0.562	0.458	1
ZEB1-AS1	0.0517278	-0.052341	0.014	0.051	1
CALHM6	0.0517447	0.0448244	0.068	0.031	1
AFF4	0.0518728	0.140819	0.658	0.555	1
SOX30	0.0518829	0.0632029	0.075	0.036	1
CFAP20	0.0519766	0.114294	0.493	0.391	1
VNN1	0.0522648	0.0419635	0.048	0.018	1
EIF3C	0.0522648	0.0419635	0.048	0.018	1
RAB3D	0.0522648	0.0419635	0.048	0.018	1
DIAPH2-AS1	0.0522748	0.0534685	0.048	0.018	1
ANLN	0.0523206	0.207821	0.486	0.386	1
GOSR2	0.0523379	-0.161604	0.404	0.473	1
PEX26	0.0523778	-0.116359	0.116	0.187	1
LINC02154	0.0524044	-0.121471	0.021	0.061	1
ZMYND19	0.0524622	0.122269	0.356	0.266	1
CCDC190	0.0525811	-0.0683155	0.034	0.082	1
HSD3B7	0.0526051	-0.0735645	0.055	0.11	1
CENPI	0.0526402	0.114539	0.226	0.156	1
ACAD8	0.0527946	0.0992721	0.199	0.133	1
PRPF4B	0.0528341	0.152149	0.712	0.634	1
SUN1	0.0528544	0.149717	0.397	0.315	1
MAP4K3-DT	0.0529302	-0.124005	0.384	0.478	1
CTDP1	0.0529704	-0.0635573	0.041	0.092	1
GNAQ	0.0530886	-0.129815	0.445	0.527	1
ADGRE5	0.0531033	-0.161268	0.253	0.338	1
PDIA6	0.0531088	0.13732	1	1	1
FAM126A	0.0532119	-0.145461	0.39	0.494	1
LINC00623	0.0532393	0.0383431	0.048	0.018	1
SCN11A	0.0532393	0.0383431	0.048	0.018	1
HIF1A-AS3	0.053335	0.0540429	0.075	0.036	1
RCOR3	0.0534192	0.1099	0.39	0.302	1
SNHG9	0.0534342	0.160572	0.466	0.391	1
GJA5	0.0534403	0.0434189	0.034	0.01	1
CWF19L1	0.0535647	0.0910516	0.185	0.12	1
ZFAS1	0.0537228	-0.218015	0.877	0.934	1
HERC2	0.0537496	-0.194045	0.411	0.468	1
AC107214.1	0.053752	-0.0785949	0.068	0.128	1
ITPKC	0.0537576	-0.0635348	0.021	0.061	1
MNS1	0.0537593	0.0857573	0.137	0.082	1
RITA1	0.0537977	-0.0761334	0.178	0.266	1
YARS2	0.0538027	0.121239	0.425	0.338	1
TRIM27	0.0538408	-0.130478	0.274	0.358	1
LINC02755	0.0538789	0.0821986	0.13	0.077	1
RPL36	0.0538875	-0.0578871	1	1	1
NALCN	0.0538891	-0.0862835	0.048	0.1	1
MEAF6	0.0539452	-0.134117	0.596	0.691	1
AC127502.2	0.0540554	-0.060071	0.021	0.061	1
STAT6	0.0541132	-0.129411	0.164	0.235	1
AL390195.1	0.0541356	0.0338961	0.034	0.01	1
AL136987.1	0.0541356	0.0338961	0.034	0.01	1
AC106791.1	0.0541356	0.0338961	0.034	0.01	1
HOXA13	0.0541356	0.0338961	0.034	0.01	1
AP002813.1	0.0541356	0.0338961	0.034	0.01	1
AC011933.4	0.0541356	0.0338961	0.034	0.01	1
TFPI2	0.0541867	0.192128	0.767	0.719	1
PPP1R3B	0.0543076	0.0742433	0.082	0.041	1
SPAG4	0.0544571	0.111872	0.205	0.138	1
ZNF316	0.0544607	-0.0607875	0.027	0.072	1
LRP11	0.0545098	0.0753089	0.315	0.228	1
AC083837.1	0.0545391	-0.119659	0.048	0.1	1
BLM	0.0546078	0.136585	0.205	0.141	1
SAP30L	0.0546151	0.114813	0.411	0.32	1
SKAP2	0.0546712	-0.109115	0.514	0.611	1
HOXD11	0.054792	-0.146359	0.507	0.596	1
ZNF41	0.0548055	0.0799304	0.103	0.056	1
RFXAP	0.0548056	0.0887543	0.103	0.056	1
PRAG1	0.0548271	-0.0885879	0.027	0.072	1
STXBP1	0.0548927	-0.136017	0.342	0.427	1
MCM10	0.0549623	0.105424	0.212	0.143	1
AC008415.1	0.055023	0.0302484	0.034	0.01	1
AC099489.1	0.055023	0.0302484	0.034	0.01	1
AP4S1	0.0550337	0.0619736	0.151	0.092	1
HDAC9	0.0551775	0.0906418	0.274	0.194	1
MOAP1	0.055272	-0.0844398	0.096	0.161	1
ARHGEF26	0.0553001	0.0751405	0.13	0.077	1
ATG16L1	0.0553337	-0.0675469	0.055	0.11	1
FAXC	0.0554119	0.0525556	0.075	0.036	1
FAM92A	0.0554206	-0.126925	0.459	0.54	1
DCBLD1	0.0554771	0.180572	0.541	0.481	1
ZNF257	0.0557631	0.0870827	0.11	0.061	1
CRYBB2	0.0559875	0.108317	0.274	0.199	1
CNOT7	0.0560217	0.161753	0.623	0.54	1
KRT34	0.0561264	0.161419	0.171	0.113	1
PSMD5	0.0561665	0.111098	0.281	0.207	1
CDH8	0.0562324	-0.0480124	0.007	0.038	1
Z83843.1	0.056276	-0.0538846	0.021	0.061	1
PLXNB1	0.0563628	-0.0444633	0.007	0.038	1
PCDH11X	0.0563628	-0.0444633	0.007	0.038	1
C3orf67	0.0563692	0.090659	0.123	0.072	1
PHF1	0.0563712	0.104997	0.329	0.246	1
ACTG2	0.0564287	-0.301925	0.219	0.292	1
DIRC3-AS1	0.0564425	-0.0580714	0.027	0.072	1
BRF2	0.056459	-0.0823739	0.075	0.136	1
[truncated: 23,541 more rows]

## Sheet: gRNA-7vsgRNA1-DEG
Gene	p_val	avg_log2FC	pct.1	pct.2	p_val_adj
[truncated: 25,282 more rows]

[truncated: 51 more sheets: gRNA-8vsgRNA1-DEG, gRNA-9vsgRNA1-DEG, gRNA-10vsgRNA1-DEG, gRNA-11vsgRNA1-DEG, gRNA-12vsgRNA1-DEG, gRNA-13vsgRNA1-DEG, gRNA-14vsgRNA1-DEG, gRNA-15vsgRNA1-DEG, gRNA-16vsgRNA1-DEG, gRNA-17vsgRNA1-DEG, gRNA-18vsgRNA1-DEG, gRNA-19vsgRNA1-DEG, gRNA-20vsgRNA1-DEG, gRNA-21vsgRNA1-DEG, gRNA-22vsgRNA1-DEG, gRNA-23vsgRNA1-DEG, gRNA-24vsgRNA1-DEG, gRNA-25vsgRNA1-DEG, gRNA-26vsgRNA1-DEG, gRNA-27vdgRNA1-DEG …]
