# Supplementary material for: Assessment of the histone mark-based epigenomic landscape in human myometrium at term pregnancy
Source: eLife. 2025 Jun 10;13:RP95897. doi: 10.7554/eLife.95897 (PMC12151536; doi:10.7554/eLife.95897)
Supplement: Supplementary file 9. [file elife-95897-supp9.xlsx]

## Sheet: Legend
Supplementary File 9. Normalized gene expression counts across the 43 human myometrial specimens and the PGR T-Scores of individual specimen.

## Sheet: Normalized Gene Count
ID	NOVA0400.PMeno1_20220823_142722.L001	NOVA0400.PMeno2_20220823_142722.L001	NOVA0400.PMeno3_20220823_142722.L001	NOVA0400.PMeno4_20220823_142722.L001	NOVA0400.PMeno5_20220823_142722.L001	NOVA0400.PMeno6_20220823_142722.L001	NOVA0400.PMeno7_20220823_142722.L001	NOVA0400.PMeno8_20220823_142722.L001	NOVA0400.PMeno9_20220823_142722.L001	NOVA0400.PMeno10_20220823_142722.L001	NOVA0400.PMeno11_20220823_142722.L001	NOVA0400.PMeno12_20220823_142722.L001	NOVA0400.PMeno13_20220823_142722.L001	NOVA0400.PMeno14_20220823_142722.L001	NOVA0400.PROPh1_20220823_142722.L001	NOVA0400.PROPh2_20220823_142722.L001	NOVA0400.PROPh3_20220823_142722.L001	NOVA0400.PROPh4_20220823_142722.L001	NOVA0400.PROPh5_20220823_142722.L001	NOVA0400.PROPh6_20220823_142722.L001	NOVA0400.PROPh7_20220823_142722.L001	NOVA0400.PROPh8_20220823_142722.L001	NOVA0400.PROPh9_20220823_142722.L001	NOVA0400.PROPh10_20220823_142722.L001	NOVA0400.PROPh11_20220823_142722.L001	NOVA0400.PROPh12_20220823_142722.L001	NOVA0400.PROPh13_20220823_142722.L001	NOVA0400.Provera1_20220823_142722.L001	NOVA0400.Provera2_20220823_142722.L001	NOVA0400.Provera3_20220823_142722.L001	NOVA0400.Provera4_20220823_142722.L001	NOVA0400.Provera5_20220823_142722.L001	NOVA0400.Provera6_20220823_142722.L001	NOVA0400.Provera7_20220823_142722.L001	NOVA0400.Provera8_20220823_142722.L001	NOVA0400.Provera9_20220823_142722.L001	NOVA0400.Provera10_20220823_142722.L001	NOVA0400.SecPh1_20220823_142722.L001	NOVA0400.SecPh2_20220823_142722.L001	NOVA0400.SecPh3_20220823_142722.L001	NOVA0400.SecPh4_20220823_142722.L001	NOVA0400.SecPh5_20220823_142722.L001	NOVA0400.SecPh6_20220823_142722.L001
A1BG	5.35919	2.39473	3.16876	3.14472	4.52843	3.95142	3.41144	3.78673	3.81012	3.38225	2.23287	3.15981	4.88998	9.20818	4.73692	3.47142	3.87192	3.74493	4.55873	2.75098	3.16767	3.30989	3.53069	6.84913	3.29448	4.76794	2.67527	2.54545	4.13499	2.42284	3.46912	3.12812	3.93204	5.5801	5.26937	3.14792	4.4658	2.13741	3.28527	2.47671	6.04555	0.756588	4.36256
A1BG-AS1	7.61156	2.47623	5.19369	2.15638	3.56819	6.85683	4.37584	7.25743	4.49426	2.92455	3.59397	3.89974	3.67654	9.50237	3.5656	5.13568	8.50866	5.39646	9.86701	3.82623	3.66792	6.0426	5.75931	12.7685	4.63765	7.58805	3.32172	4.89373	5.88589	5.68733	6.07018	4.40214	10.081	9.0474	2.74243	4.08256	6.93047	2.63828	5.03106	2.94384	7.54255	1.92736	9.45367
A2M	600.524	517.566	1216.47	1155.55	804.107	1036.5	1057.66	754.798	934.525	665.492	848.817	495.071	701.184	365.819	580.785	934.856	1135.5	1028.24	777.829	814.894	856.035	1308	970.116	537.535	1002.21	1098.55	1112.05	1008.89	880.249	1419.93	965.467	1180.02	1108.52	1066.84	234.373	1083.07	726.055	990.22	1387.8	266.528	764.459	1486.94	1174.58
A2M-AS1	8.0238	8.1221	3.42435	7.35828	7.247	3.26731	3.20239	2.81726	2.60073	5.68342	2.05015	4.25117	3.03766	12.3616	5.46887	3.23988	4.46247	1.66828	2.90959	4.82319	3.90495	1.50897	1.38979	2.99603	4.09816	2.31467	4.59874	4.44041	3.86248	2.12091	2.1556	2.30297	1.92378	1.54452	0.149497	4.2086	3.32865	1.90064	3.04626	1.63861	3.99519	2.31612	2.35574
A2ML1	0.059494	0.0670343	0.13519	0.0631188	0.0467453	9.58521e-05	0.241806	0.182886	8.90469e-05	9.02319e-05	0.218868	0.609875	8.48725e-05	0.0672656	0.23564	0.151585	9.66493e-05	0.0658188	0.0693666	9.62027e-05	0.129492	0.0402419	0.143898	0.06132	0.0590481	0.561951	0.253531	0.627754	0.596379	0.000104356	0.0800725	0.145608	0.272983	0.000103238	6.7892	0.136075	9.23143e-05	9.97347e-05	0.499431	9.46105e-05	0.000105247	0.000110531	0.0838375
A2MP1	1.1351	0.403136	0.719104	0.445511	0.451976	0.382069	0.949148	0.345366	0.198703	0.549756	0.114648	0.218084	0.655992	0.404518	0.437627	0.777141	0.398087	0.309743	0.600085	0.633658	0.186375	0.385997	0.566114	0.608829	0.432163	0.215341	0.194052	0.50428	0.652912	0.301182	0.236244	0.398005	0.34797	0.310477	0.130206	0.765325	0.274949	0.116117	0.112127	0.223287	0.35607	0.197975	0.109688
A3GALT2	9.18271e-05	8.38274e-05	0.0354547	0.0165869	8.4978e-05	0.0167034	0.0254065	9.47635e-05	0.145739	0.0172673	0.0430564	0.0727456	0.0153385	0.0176866	8.72566e-05	8.94826e-05	0.0995941	0.0172998	0.0305983	0.0310016	0.0508967	0.000106291	0.0378301	0.0321588	0.0155246	0.0196738	0.0353627	0.0505159	0.0284804	0.00010431	0.0253987	0.0443091	0.024098	0.0731323	0.0244856	0.0534852	0.021235	0.116117	0.0187735	0.0558928	0.0629225	0.000110453	0.0220239
A4GALT	27.0779	20.6417	31.9836	27.1577	13.9774	28.981	28.3087	33.0442	32.7435	34.6411	33.0943	23.1477	20.5159	43.9412	20.5311	35.6654	19.3699	25.3357	25.9149	31.8458	20.5923	27.5713	22.1295	40.7609	34.4786	43.9317	41.4791	23.0495	37.3461	22.8878	17.1442	28.8241	20.9918	22.1256	15.9017	23.8755	27.1129	21.1533	28.7308	26.9408	52.5348	29.7346	36.9275
A4GNT	0.202216	0.210372	0.200473	0.132066	0.195497	0.0333109	0.278487	0.507847	0.384077	0.223392	0.229196	0.043678	0.22889	0.052853	0.1852	0.209296	0.398087	0.309743	0.233986	0.177802	0.321854	0.0827972	1.30194	0.0481774	0.0155246	0.332742	0.229316	0.386637	0.326505	0.225913	0.0760017	0.309581	0.144051	0.200934	0.105809	0.356017	0.380663	0.0871126	0.354845	9.46079e-05	0.146679	0.568972	0.37268
AAAS	70.2653	61.3665	52.9278	49.5052	50.872	51.2505	52.7562	62.1862	49.2778	67.6094	55.9592	54.7075	55.5458	69.5223	58.0863	48.0252	45.1027	52.6389	50.1742	47.8121	50.6882	38.7302	51.2928	57.4583	48.3665	54.6596	52.9455	36.7728	39.7403	32.7678	35.4924	49.8379	38.3568	46.4015	51.7424	49.3106	56.4918	44.1037	38.541	46.3558	51.7301	43.824	50.4197
AACS	12.2801	11.7367	10.5269	13.5559	8.76359	11.9426	12.4539	13.9363	14.8384	11.1424	14.5592	14.536	12.7932	9.62305	11.4769	8.62107	11.4132	13.3559	11.9378	13.8507	12.256	11.538	11.7781	15.6689	11.6817	13.3939	11.2563	9.79719	12.1214	9.32015	12.1348	14.8177	11.7712	13.1475	18.6339	12.7384	11.1453	13.572	11.4173	11.0901	13.1268	13.0649	15.1727
AACSP1	0.0303786	0.0171518	9.35396e-05	0.00812372	0.0298235	0.00818349	0.0555595	0.0594393	0.00653722	0.0335502	0.0140469	0.188993	0.0520832	0.0343546	0.024673	0.00494094	9.66493e-05	0.00847472	0.0198995	0.0113841	9.22969e-05	0.0269525	0.0184718	0.00792241	9.35412e-05	0.0191645	0.0258583	9.76526e-05	0.0139194	0.00926812	0.00831151	0.00547972	0.005949	0.0356674	0.162295	0.00876365	0.030981	0.028349	0.0273799	0.0363253	0.0612877	0.0121552	0.0107807
AADAC	0.0311879	8.38274e-05	9.35396e-05	0.0165869	0.0122982	0.066526	0.0127525	9.47635e-05	0.397317	9.019e-05	0.0573748	0.0872795	0.0305922	0.123186	0.151543	0.0598626	0.0199961	0.0172998	0.101784	0.00782255	0.0339619	0.000106291	0.0189628	0.0802146	0.0309556	0.000107019	0.0177305	9.76526e-05	0.0994386	0.0565564	0.126605	0.0277296	0.0840743	0.0731323	0.14647	0.0178932	9.21523e-05	0.0291039	0.0187735	9.46079e-05	0.0210443	0.000110453	0.00010788
AADACL2	0.062284	0.0701798	0.330131	0.247546	0.146644	0.0499185	0.455642	0.406297	0.370836	0.257746	0.0716932	0.0727456	0.10686	0.158352	0.0337442	0.129598	9.66493e-05	0.103313	0.254325	0.100539	0.0508967	0.0414517	0.113299	0.256419	0.324146	0.0588072	0.123523	0.0505159	0.0284804	0.677529	0.0338325	0.331687	0.264003	0.200934	0.122073	0.231445	0.021235	9.95428e-05	0.0374441	9.46079e-05	0.732974	0.0990429	0.0439399
AADACL4	0.0156399	8.38274e-05	0.0472418	0.379522	0.427549	0.116349	0.594836	0.345366	0.304631	0.58411	0.214877	0.0727456	0.411933	0.175936	0.1852	0.109674	0.119494	0.08611	0.274664	0.139171	0.152505	0.193052	0.320839	0.208364	0.324146	0.0783739	0.91697	0.151352	0.28393	0.301182	0.784443	0.237737	0.12006	0.255705	0.00822097	0.0890772	0.232663	0.232134	0.149468	0.0930916	1.02612	0.222708	0.087772
AADACP1	0.140024	0.24542	0.0826029	0.0660781	0.171071	0.0333109	0.227871	0.162576	0.648895	0.0859755	0.243514	0.595963	0.198382	0.422101	0.40397	0.308918	0.119494	0.08611	0.183139	0.115992	0.20331	0.137924	0.339706	0.0481774	0.277852	0.254475	0.493798	0.100934	0.440038	0.282365	0.236244	0.171419	0.443932	0.164419	1.82173	0.124669	0.0635206	0.116117	0.168139	0.0744922	0.0419834	0.0495767	0.0439399
AADAT	14.4024	15.8776	19.6699	25.4863	27.2233	22.1353	17.3863	23.7947	20.805	19.0962	17.6968	17.8025	22.4233	5.91637	19.4131	18.5346	16.5077	22.6323	19.8653	14.2655	19.477	24.4854	20.6425	8.52646	17.9836	17.4517	18.5874	23.5215	22.4143	14.7516	17.6873	13.3223	19.0045	21.6586	9.31858	24.1354	16.7437	19.3554	18.3287	19.7491	16.902	19.3733	28.4437
AAGAB	17.9594	14.9261	20.1913	19.0777	14.1147	20.8635	22.5707	18.4148	18.1829	12.388	24.3352	15.9795	9.39676	15.9103	15.0208	18.9065	33.123	23.0854	24.1329	22.3768	19.3868	26.1512	18.4716	28.8239	19.0157	29.746	25.8113	24.2978	27.8844	27.4859	28.9179	23.7042	31.0693	24.4417	23.4976	23.62	18.4607	24.2124	26.5083	27.3159	25.422	21.3944	30.2035
AAK1	33.5219	24.724	48.0219	27.7987	27.5109	33.3655	47.0078	38.0027	34.7943	28.4635	32.9045	26.2775	26.9156	36.8607	22.2118	40.7781	42.1952	45.1542	40.4967	38.3913	51.7505	44.556	42.1663	52.3678	37.506	46.0975	41.9698	48.0495	39.7372	45.2464	50.952	35.972	59.1482	37.9224	38.3448	51.4553	44.0272	64.9492	60.4095	53.8437	44.5955	42.3114	50.8905
AAMDC	7.72695	5.56729	7.54125	5.77913	5.50018	5.44242	6.09063	8.67742	4.66637	10.3122	5.88015	3.27066	6.39851	12.5608	4.612	5.20699	4.60681	4.9373	6.20623	7.11908	4.28729	5.60946	6.86843	11.3889	6.5938	8.18955	3.5196	3.62753	4.12304	3.61152	5.05644	7.78446	5.90055	7.07801	5.12946	4.91184	5.05307	3.92988	4.50885	5.31059	9.17207	6.13774	4.44249
AAMP	83.5799	81.541	69.9603	71.7652	54.4063	61.4717	62.8955	81.4309	69.2607	80.473	74.905	64.4543	66.5792	84.145	71.4188	63.4765	58.9667	59.3856	61.4357	74.1012	58.0603	62.0889	65.8281	94.4176	70.4242	66.9825	75.908	47.2531	60.7196	43.402	55.6793	67.3653	60.6686	68.1243	79.038	54.544	66.5241	58.2938	52.4318	74.5535	90.2005	60.9545	65.551
AANAT	9.18271e-05	0.035826	0.0357215	8.98604e-05	0.0499401	0.101835	0.154815	0.0415195	8.90469e-05	0.105194	0.000101141	0.0593633	0.0311874	0.123186	8.72566e-05	0.0598626	9.66493e-05	0.0345024	0.0348179	0.0306994	9.22969e-05	0.0276699	9.55554e-05	0.000121546	9.35412e-05	0.000107019	0.0979313	9.76526e-05	9.712e-05	0.113008	0.0172913	9.70507e-05	0.0840743	0.000103092	0.0931722	9.72288e-05	0.0846634	9.95428e-05	0.0187735	9.46079e-05	0.0428129	0.049093	0.0435113
AAR2	46.4295	41.7417	39.7535	36.6417	34.0526	40.9349	47.5765	47.3954	36.6962	42.9932	49.3612	32.369	36.0347	54.3894	34.3505	38.9033	36.2106	45.3346	41.2142	41.4742	39.541	41.3633	46.7251	58.3624	38.6106	41.7828	38.8778	37.857	37.0049	38.5057	34.9347	38.9127	35.3384	41.623	30.802	37.7113	42.5801	38.3564	44.5702	54.1127	50.0069	38.6444	48.9377
AARD	0.995167	0.262944	0.09439	0.0660781	0.134431	1.04637	0.240524	1.34056	0.370836	0.171861	0.916479	0.581429	0.137368	0.299018	1.54831	0.308918	2.94522	0.326946	0.274664	0.463678	0.16944	0.758106	0.415175	0.560773	0.54018	0.391442	0.282213	0.151352	0.326505	0.376451	1.28204	0.337214	0.108065	2.79347	0.0488825	0.391609	0.253806	0.551183	2.44595	0.688272	0.418887	0.445306	0.854833
AARS1	112.241	104.671	133.394	115.991	88.7783	111.022	114.822	133.701	110.165	99.1118	141.38	99.1642	84.1545	130.415	93.3812	102.302	128.989	127.316	130.514	125.43	105.555	144.654	113.185	152.369	110.795	142.015	131.624	118.281	118.94	104.85	102.412	114.31	126.634	131.088	76.8586	112.827	113.791	104.271	112.285	128.41	155.075	137.442	153.062
AARS2	38.4815	42.0752	27.1339	35.6998	29.9104	31.6043	28.5981	33.5321	30.8118	35.4364	37.7434	31.5094	38.0122	33.7951	40.8932	29.7671	28.6753	27.9026	29.6032	30.1483	26.2152	28.4458	29.0557	26.1906	29.2111	28.8023	28.5818	22.0497	28.7524	19.5137	21.6329	28.6219	21.5196	28.2807	34.538	26.0356	31.1434	27.0902	23.8052	23.4911	32.7279	34.0576	30.5072
AARSD1	26.4949	24.6931	24.0697	22.539	16.9333	21.4448	23.3262	27.946	22.1202	28.0294	30.1425	19.4636	21.9842	40.6489	20.9371	22.0478	27.6528	19.5782	22.7393	29.8327	17.9807	26.975	23.2553	44.2888	24.6529	21.9964	24.9535	16.4138	20.028	16.4269	18.4359	24.6086	21.065	26.0541	21.5662	22.5896	22.8252	21.6458	20.695	28.087	38.2601	25.087	24.6455
AASDH	7.52934	8.65612	5.82943	7.38907	5.92807	3.94623	3.84873	9.01905	5.5221	5.68957	5.05112	8.97407	6.45252	1.68507	8.77208	3.31251	8.82198	4.54053	7.3947	7.37699	3.53731	3.63968	4.52052	6.13972	7.45265	7.23278	3.84344	3.37834	6.45908	3.47635	5.70417	8.06732	4.14684	7.87012	3.67727	2.5035	3.04414	2.25917	3.66239	2.75592	5.41027	2.3567	3.7992
AASDHPPT	36.7712	44.3358	30.1867	37.102	36.4078	36.7194	34.0647	31.1558	30.0703	29.7679	45.2892	30.3612	29.8057	21.4341	34.9696	28.7609	42.9432	35.2653	32.2371	35.5568	37.0365	42.1311	36.3384	28.4332	35.9853	33.1266	35.1233	43.3598	31.988	42.1133	29.2739	37.1493	35.794	35.2185	38.7831	34.293	35.0549	29.7876	40.198	35.7853	27.556	29.3583	39.3613
AASS	118.616	181.111	148.918	139.813	213.5	102.768	131.551	167.944	114.667	136.764	97.3366	133.798	170.917	99.785	154.957	129.947	159.813	124.082	105.091	112.032	132.871	98.4022	140.203	95.9837	133.54	146.868	141.621	188.077	144.003	118.361	121.287	116.549	156.61	149.345	79.4528	163.011	186.31	136.118	164.339	125.193	98.2464	151.144	151.199
AATBC	0.559821	1.08657	1.83887	2.01273	2.07634	1.22905	1.29081	0.710948	1.33742	0.962006	0.701703	1.24998	1.46444	0.68585	1.48099	1.63389	1.73135	1.47952	1.11872	0.98907	1.23633	1.54367	1.66041	0.448643	0.98768	0.900177	1.85147	1.86557	0.851595	1.26087	0.927819	1.06119	1.89536	1.46069	1.39071	0.961081	1.64923	1.45032	1.17635	0.44648	1.25645	1.75616	1.09591
AATF	35.5274	36.3799	47.0187	32.4003	29.5684	33.4311	33.6724	45.7587	34.9032	36.5529	38.4164	33.8202	34.3818	50.9563	33.169	32.6362	31.8791	34.1816	36.6913	34.6065	45.6224	32.5665	35.1121	50.0423	41.3553	41.7946	43.7807	32.4862	30.5831	29.788	35.5318	39.0725	32.3513	35.0907	45.6955	42.7461	41.0806	32.804	28.3234	46.2568	46.7571	33.2414	33.6193
AATK	3.17492	2.0058	3.24183	5.78794	2.6833	2.93476	3.65058	1.9545	2.02358	4.28977	0.930319	1.83095	1.83375	2.028	3.02769	3.41263	2.20122	2.31248	2.2913	1.89822	2.60972	2.18719	3.90754	2.87221	2.24949	2.00733	2.80365	1.27056	2.57021	3.16804	1.70063	2.24653	4.14019	2.47191	2.39601	4.42712	3.31377	0.556848	1.53822	1.89182	3.59088	2.05132	1.21081
ABALON	0.890006	0.914648	1.51668	1.21479	0.642033	1.36561	1.15214	1.29945	1.33352	0.897093	1.50245	1.29623	0.722921	0.435483	1.09642	1.30931	0.864861	0.942435	1.01517	1.18315	1.02008	1.67733	1.17749	0.703061	0.920134	0.715172	2.28978	1.36827	2.11518	1.11616	2.12033	1.23892	1.95734	2.1086	4.61919	2.91896	1.62363	1.57091	1.70909	1.36021	1.00828	1.43854	0.881243
ABAT	8.17709	12.5407	12.9308	10.5397	18.068	8.16081	12.4549	11.4821	9.01203	6.72103	8.35158	10.9725	13.1518	5.70053	7.66926	8.94713	8.61935	10.858	5.02754	6.07765	12.1259	7.67462	9.79535	7.1361	7.67278	19.2268	12.9175	20.389	15.8109	8.57007	8.63595	8.33744	11.3176	11.538	12.4816	10.2482	16.6077	10.0637	16.3921	7.74709	9.31408	16.4886	12.3142
ABCA1	25.6699	44.143	54.9042	14.8804	35.6873	26.9043	22.4863	27.0735	23.516	26.6932	7.68908	46.3774	37.6308	6.85757	28.4065	25.9616	14.7854	39.1703	15.9762	12.1382	101.66	9.22014	35.3762	14.1125	22.73	18.3733	35.2115	74.972	15.8522	25.7987	61.6767	25.2507	19.7563	14.8798	24.0229	15.1979	49.136	51.6569	37.1546	82.0978	17.7984	20.4544	15.6481
ABCA10	18.2398	20.7561	13.8911	25.6921	79.8098	19.8588	32.4034	35.1934	14.6952	35.5912	19.4863	14.4935	63.7149	10.9829	25.7276	25.0119	5.3548	19.9062	18.3645	16.6354	34.8895	10.5318	28.746	9.58865	29.3639	16.9711	12.544	20.6196	8.99503	16.6714	2.90013	24.9529	9.37387	16.4902	20.439	11.5219	22.7741	15.3777	21.5858	7.42536	17.6674	17.6239	7.30883
ABCA11P	14.1002	13.5868	13.009	15.3861	15.3224	12.7242	10.8292	12.7963	10.2134	11.8372	10.8909	10.8523	15.1686	11.6246	13.6207	10.7705	13.669	10.0148	9.96884	11.0045	10.3643	11.3701	9.60354	7.22452	9.01644	9.36381	8.28721	10.3022	7.48302	8.19679	6.88897	8.14649	9.56605	10.6782	9.54895	9.60993	12.8159	6.93214	9.29741	8.63136	11.4077	8.97823	10.1472
ABCA12	9.18271e-05	0.0350704	0.0353927	0.016558	8.4978e-05	0.0332527	9.85261e-05	9.47635e-05	8.90469e-05	9.019e-05	0.0286877	0.188685	8.48689e-05	0.0176557	8.72566e-05	8.94826e-05	0.0596905	0.0688346	0.0609995	9.61919e-05	0.0169974	0.0276216	9.55554e-05	0.0161121	0.0309015	0.0391719	9.8385e-05	9.76526e-05	0.081734	0.0188887	0.0337734	0.0221643	0.0240559	0.0183284	0.00820671	0.017862	0.0211979	0.0580066	0.000102874	9.46079e-05	0.0837148	0.148249	0.0438631
ABCA13	0.0156399	0.490756	0.0118806	8.98604e-05	0.0122982	0.0333109	0.0127525	9.47635e-05	0.450281	9.019e-05	0.0430564	3.41552	0.22889	0.052853	0.605912	0.0499004	0.0199961	0.172123	0.101784	0.0310016	0.0170271	0.0276699	0.0566974	0.0321588	0.0309556	0.0783739	9.8385e-05	0.067322	0.11363	0.00010431	0.590465	0.0332561	0.12006	0.000103092	30.667	0.0534852	0.126949	1.65335	0.0747854	0.14889	0.000105181	0.000110453	0.065856
ABCA17P	0.311053	0.68352	0.365492	0.478505	1.22141	0.282424	0.253178	0.325056	0.450281	0.41234	0.401016	0.639564	0.823782	0.492434	0.723711	0.468313	0.238891	0.206528	0.193309	0.347782	0.186375	0.275743	0.471777	0.160308	0.216128	0.137074	0.282213	0.42025	0.269738	0.113008	0.135038	0.254316	0.216022	0.273963	0.528689	0.551773	0.444091	0.145121	0.354845	0.334884	0.272314	0.445306	0.065856
ABCA2	27.2682	16.2231	47.2932	37.224	29.5821	28.4611	37.0913	24.1009	41.5681	30.9663	22.2919	25.6722	25.3005	25.1161	29.7499	41.6473	25.1237	31.0949	40.5491	22.2998	25.161	28.2102	31.153	19.3615	31.3558	32.7233	32.2411	32.0472	26.2097	28.4057	24.125	24.8676	25.997	25.8876	62.7203	25.7913	27.7137	22.7798	29.8236	17.169	32.2733	31.9076	32.9255
ABCA3	15.8591	17.5591	26.3559	21.9247	16.0239	25.0443	18.9684	21.1023	30.547	28.2907	12.9296	13.9235	19.3112	23.7023	25.7813	35.5452	18.8847	15.4824	13.5051	14.4716	17.0534	33.2418	28.2821	13.4718	14.2429	17.1993	15.8161	12.9072	12.1056	14.1696	14.7256	15.9385	20.7759	13.5653	19.8267	25.4484	22.2423	10.4127	13.4056	14.5634	19.2641	25.6731	10.1034
ABCA4	0.419889	0.297992	0.448002	0.610481	0.684028	0.415285	0.41768	0.182886	0.43704	0.343631	0.214877	1.04651	0.442441	0.562767	0.420799	0.438426	0.139393	0.22373	0.386528	0.200982	0.355723	0.165488	0.24537	0.256419	0.617335	0.411008	0.317477	0.084128	0.823212	0.395269	0.700105	0.265369	0.156046	0.164419	2.72441	0.676345	0.422948	1.10227	0.466869	0.353483	0.607339	0.321641	0.087772
ABCA5	17.7304	45.5956	18.3643	23.4458	27.7998	13.8208	16.1137	24.3474	22.8875	20.9328	14.2481	36.6723	27.9144	15.4228	27.7899	20.2289	15.427	15.7998	13.8247	14.1942	18.4853	14.0457	19.8256	10.8958	16.48	13.6499	14.0688	26.3557	16.3805	20.0043	9.65253	12.6713	20.4831	14.4227	36.3432	17.3047	17.8817	18.9155	16.5846	21.1044	14.6864	10.2575	14.4626
ABCA6	18.9221	21.835	15.8419	20.6379	29.1532	20.0952	22.6761	26.0783	18.2594	31.7948	9.53616	22.6437	33.2835	12.238	23.0382	18.1213	2.82582	17.5295	17.3999	10.9329	31.8545	6.83588	29.2255	9.19481	26.4643	18.9603	16.9799	15.4449	10.5587	17.9142	13.9328	24.1067	13.3628	14.9894	9.39291	25.128	17.5275	26.075	31.4788	7.38405	15.8091	16.5218	11.6375
ABCA7	7.19884	4.01308	6.094	6.43395	7.24255	8.51977	6.66876	4.95576	7.78577	10.4609	4.38153	18.8214	5.73546	6.1894	5.14959	11.2076	3.54221	6.17581	10.4644	4.24187	5.77486	5.26476	7.58474	4.8858	8.82665	7.27893	14.1587	4.85705	6.91142	4.8738	7.9026	5.6095	6.87339	4.29057	18.7695	9.50315	8.71093	9.48453	6.32944	4.29655	6.28184	4.9962	5.4572
ABCA8	16.9954	26.087	9.05957	22.5103	38.2072	25.8134	20.0227	26.295	11.7736	26.8076	10.3752	37.5023	42.9396	13.6893	31.2213	17.4867	4.39199	9.96339	12.8699	11.0919	10.8918	8.10695	17.3653	8.7066	21.1394	12.3686	6.49531	4.07443	5.81584	10.8742	5.47619	15.2946	9.68991	13.3455	9.13082	15.2646	12.3805	11.7104	16.2462	5.67794	19.8552	7.82664	6.29379
ABCA9	51.5335	57.977	51.6745	60.6501	79.0322	79.3134	67.0916	85.5055	43.9865	86.6327	27.8123	66.4386	92.1169	43.9758	102.442	66.3829	6.94502	42.886	46.1588	26.6514	121.687	32.0352	54.4888	20.35	90.4656	31.209	57.7454	71.9732	33.1152	42.4144	22.345	56.5832	36.1962	52.6359	44.3944	50.0856	78.2496	105.932	73.7117	31.9353	54.96	45.4843	21.7627
ABCB1	85.6996	41.666	50.674	43.1763	63.7603	41.7853	43.3828	38.2203	32.868	47.4734	25.933	42.6082	42.2167	48.9405	50.0052	63.269	46.2442	37.6478	75.6637	48.6694	37.9811	49.8524	47.0263	37.1997	59.1072	49.8993	29.5376	55.5868	18.784	41.0324	28.5926	38.8767	33.2232	48.8866	14.7025	18.3548	35.4217	42.1011	41.9501	35.0662	34.1411	21.0568	46.183
ABCB10	18.5178	22.203	20.8868	22.6011	20.9214	19.597	23.739	18.7666	16.8823	19.9083	24.4703	15.9582	18.274	12.9765	15.6674	18.5995	22.586	21.2968	18.9457	21.3712	17.2397	20.2594	24.3389	27.8725	16.928	25.1434	18.2494	27.1587	25.8147	37.1644	25.7402	22.5261	38.325	28.8467	20.4935	23.6866	17.8023	20.5062	31.9829	21.2592	22.719	24.1643	28.7758
ABCB11	9.18271e-05	0.0176078	9.35396e-05	8.98604e-05	8.4978e-05	9.58231e-05	0.0254065	0.0610251	0.0398119	0.0344443	0.000101141	0.0582118	0.0153385	0.052853	8.72566e-05	0.0399383	9.66493e-05	0.0172998	9.00623e-05	9.61919e-05	0.0678315	0.000106291	0.0378301	0.000121546	9.35412e-05	0.000107019	0.0353627	0.0169037	9.712e-05	0.00010431	0.00853101	0.0277296	0.0840743	0.000103092	0.162735	0.0178932	9.21523e-05	9.95428e-05	0.0747854	9.46079e-05	0.000105181	0.0743098	0.0439399
ABCB4	0.112286	0.542104	0.598349	0.474406	0.545951	0.71454	0.639373	0.833913	0.0499355	0.399055	0.360223	1.07639	0.609441	0.959901	0.808754	0.577072	0.256439	0.75793	0.497355	0.249182	0.60169	0.384216	0.469973	0.498621	1.06706	0.22701	0.475102	0.558165	0.54172	0.394306	0.331962	0.327145	0.128787	0.232488	0.119511	0.935528	0.116111	1.18459	0.175427	0.59593	0.453265	0.169312	0.544132
ABCB5	0.213147	0.436764	3.54522	0.444137	0.201262	0.0831289	0.475239	0.218614	0.214586	0.196382	0.0716891	0.149241	1.17761	0.281419	0.10535	0.506476	9.66493e-05	0.371782	1.85229	0.102735	1.19212	0.255506	0.103897	0.42238	0.530423	0.185041	1.18262	0.0337079	0.0550629	0.998678	0.0624274	0.833179	0.295283	0.219178	0.0188506	0.30223	0.243519	0.637468	0.180518	0.239365	1.81074	0.321894	0.145268
ABCB6	15.9074	20.9979	18.1459	30.5543	19.6019	15.9978	14.8978	22.1003	20.3507	23.9879	31.7347	12.91	17.8028	19.3937	23.9935	14.6905	26.8954	16.9782	24.5946	20.3458	12.5888	17.7684	17.8239	22.3534	17.9946	22.1973	17.1641	12.9074	13.3478	13.3248	14.5403	21.6258	16.3347	21.3336	17.4177	11.2978	17.274	13.3515	10.4738	17.151	20.7483	23.2064	20.9278
ABCB7	12.0523	16.7721	14.7183	10.8362	10.7217	16.7983	15.057	12.9381	9.62031	9.60329	11.0578	9.72205	9.77557	6.25265	15.4609	12.0797	13.7732	14.8268	10.5939	7.49456	14.9506	11.5779	11.0312	7.5965	11.2835	12.5322	9.96061	10.0458	11.4926	11.0567	10.4863	16.5545	13.6933	9.3285	11.9584	14.7961	12.5087	13.7609	17.0023	14.7599	16.9045	19.5447	11.2817
ABCB8	35.164	27.4691	21.7881	32.4714	22.229	53.2655	26.5397	27.3804	30.1662	27.012	30.2599	21.2494	22.9175	26.1395	46.2437	26.4908	34.5177	30.9468	30.6188	25.8127	35.0713	36.517	27.0118	33.4582	26.9141	29.6409	33.1204	22.3386	24.8027	18.3441	33.8189	22.345	26.0233	37.0328	24.4291	27.1646	27.6412	49.0554	34.0379	57.8369	27.8217	30.0705	42.4279
ABCB9	6.30876	4.09315	4.79766	7.00084	4.72873	5.51802	4.43072	5.08329	4.08484	4.92392	5.0228	4.56493	6.45041	3.61022	6.17282	5.38971	4.70381	6.09864	5.28951	6.44	2.76603	4.40084	5.0674	6.45436	3.51284	5.75863	4.25302	3.81362	3.73746	2.80689	1.04617	5.3811	1.97887	4.14622	3.22606	3.56648	4.80713	2.68496	2.20046	0.452206	5.44158	5.07471	4.97115
ABCC1	30.5054	31.8762	49.1403	41.1768	32.1943	45.6376	43.0617	38.2643	55.8637	29.2355	42.4685	44.7787	27.5482	34.9556	35.7437	46.2346	61.4696	44.159	51.8132	44.6739	58.1034	59.9923	42.2062	42.049	50.1664	45.6884	68.4657	47.4941	41.2268	45.9521	79.4974	42.5818	66.9817	46.1728	31.8869	66.5749	50.5314	67.8123	59.2607	71.9797	47.6156	58.7165	58.0557
ABCC10	12.3253	10.3112	18.6137	26.0341	11.5605	15.3061	14.9654	8.10491	16.8886	11.0133	12.0687	7.65664	10.3267	2.18454	12.917	15.2165	13.1387	16.4469	15.199	12.2242	10.2039	17.4309	15.5447	3.02248	8.87323	15.4196	18.9173	14.7309	11.3783	8.00854	14.8917	13.3838	11.7206	16.2317	13.8145	19.2004	15.5274	16.9411	14.8345	7.49441	8.53318	18.6486	20.6274
ABCC11	0.0224077	0.0359943	0.0391752	0.102961	0.0226691	0.0483536	0.0420511	9.47635e-05	0.00129209	0.00889606	0.0545275	0.310767	0.0157885	0.00906692	0.163689	0.0507277	0.0760764	0.035728	0.0253312	0.028571	0.0649606	0.0488128	0.0960938	0.0165275	0.023458	0.024382	0.0294256	0.020947	0.0237072	0.0273082	0.0263769	0.0536721	0.184506	0.037761	0.799096	0.118633	0.0722433	0.0541869	0.027304	0.0307935	0.0346951	0.0617917	0.0727575
ABCC2	0.901879	1.29686	1.33203	1.6498	1.99085	1.44495	1.20223	0.934359	1.40363	1.09942	1.05966	1.48252	1.02208	1.1606	1.26222	1.77336	1.39306	1.46231	1.86109	0.64911	1.38875	1.19912	1.28307	0.993276	1.20372	1.23281	1.28724	1.86557	0.610337	1.58076	1.1218	1.05013	1.33158	0.985998	3.14729	1.17463	1.86066	1.50833	0.728257	1.35785	0.963304	1.13783	1.11783
ABCC3	1.03985	12.9913	4.23167	1.39397	0.599446	3.154	2.30208	3.18878	7.77162	1.0965	1.58855	34.8538	1.39521	2.54388	7.20635	6.3696	4.32728	6.48998	10.4698	5.81137	1.28714	3.39219	2.37146	7.75516	2.14501	2.17466	1.88674	15.2936	3.91146	11.974	35.3432	3.31837	3.41029	6.46144	1.50107	6.31962	2.10367	76.4779	3.12407	8.95933	3.58979	14.5616	11.0032
ABCC4	21.4938	13.0432	20.0913	9.02302	15.3683	19.6053	10.6574	7.98186	16.7904	8.99455	18.4738	20.9413	5.20424	6.37759	14.781	12.7132	20.9749	19.9851	30.2966	12.7725	13.1967	16.4749	18.0555	7.28459	13.9973	18.7036	22.9187	22.0328	19.7323	15.2814	22.6345	12.9525	25.1191	14.369	82.8885	21.2194	16.5012	20.921	25.7562	6.08328	6.29029	10.5373	9.86253
ABCC5	33.9536	42.8419	34.0928	40.4982	57.4747	37.8344	32.1397	38.5091	38.0793	36.1942	25.0864	34.2707	44.8464	22.4126	37.302	29.3029	32.3748	41.7539	33.8175	31.0804	42.2906	27.6546	34.6706	21.0361	28.7882	28.3951	28.9029	32.4969	17.5743	27.8546	37.0719	32.6082	31.3633	31.1562	19.9944	34.6872	35.6298	34.5399	25.1231	32.8189	26.7845	31.1809	37.0075
ABCC6	0.376488	1.36221	1.06004	0.192332	1.86262	0.057551	0.710401	0.12312	0.281774	0.00524196	0.600671	1.01121	4.29516	0.000921408	1.03227	0.98867	0.00120596	0.0893662	0.121911	0.177107	0.337301	0.155581	0.18837	0.380546	1.51292	0.883148	0.00700174	0.0922451	0.958456	0.825753	0.124399	0.106633	0.145558	0.444269	0.0049897	0.162777	0.000485026	0.186105	1.18379	0.212471	0.00749786	0.00466966	0.115274
ABCC6P1	0.253628	0.452285	0.102829	0.150662	2.10156	0.0788926	0.0519768	0.101645	0.0683184	0.0698591	0.0936294	0.634201	1.01327	0.000103314	0.336029	0.070301	9.66493e-05	0.0689075	0.0748623	0.0582049	0.0508967	0.0138881	9.55554e-05	0.0354763	0.107829	0.0410929	0.0471301	0.0767395	0.0159876	0.237911	0.0332798	0.0443091	0.0403863	0.000103092	0.0454695	0.117977	0.021235	9.95428e-05	0.094996	9.46079e-05	0.0210443	0.0286713	0.00010788
ABCC6P2	0.543726	0.47691	0.0403907	0.258441	1.60953	0.0469252	0.111608	0.175789	0.106515	0.0596587	0.487887	0.496522	0.928224	0.052391	0.127509	0.231159	9.66493e-05	0.149402	0.093457	0.110985	0.0778426	0.0827972	0.0906938	0.0612462	0.0596982	0.190081	0.124174	0.0953339	0.166091	0.290967	0.100543	0.13284	0.0724316	0.000103127	0.0796214	0.0356892	0.105806	0.127136	0.242043	0.123426	0.0476546	0.196512	0.0271857
ABCC8	2.74221	2.4856	1.11675	2.88279	1.98136	0.921567	2.37489	2.13496	2.10963	1.83521	1.33985	5.88344	2.89066	2.38591	4.68391	2.80533	6.51402	3.21547	1.28987	2.91572	1.02239	1.23055	2.79579	3.35051	1.76657	2.24909	2.93521	2.26189	2.66118	3.97205	3.08301	2.58877	1.32204	1.63813	0.0433611	0.600324	2.43427	2.31114	2.23822	7.40609	4.1828	0.636373	0.608439
ABCC9	14.3293	30.2921	58.5547	52.453	54.473	39.4001	38.234	28.9872	30.1056	21.6417	27.5444	12.0368	32.475	7.49714	36.3796	34.2343	51.8554	36.8527	24.346	13.2286	43.4703	31.7011	56.7567	5.1481	30.1659	28.8219	29.4121	55.4096	25.5975	44.4261	30.8831	38.3472	50.1967	26.721	3.21422	33.0096	55.1239	39.4919	65.0227	12.1634	17.7432	59.0331	48.2388
ABCD1	18.7355	10.3918	22.1715	25.5046	12.6042	19.1984	43.049	25.733	33.9234	22.9143	31.6008	10.2173	18.0452	41.5493	13.8331	26.2305	34.2073	52.7775	32.5015	27.475	25.216	28.432	23.1125	101.046	18.6871	51.6563	44.68	39.2255	37.3951	33.3256	30.6571	23.4325	43.435	50.0982	7.66073	38.6352	29.6634	38.8659	43.484	49.6977	58.3574	49.8868	71.8408
ABCD2	5.31752	3.08431	4.10199	5.97203	4.37244	16.9896	5.28947	2.6201	5.23026	1.80368	12.7005	2.86324	3.02031	3.5695	2.97872	3.28761	10.2085	9.20346	9.70171	13.6294	8.67071	21.417	7.13192	9.5312	12.561	8.4138	6.89427	12.7391	6.91142	10.2556	4.07364	20.2326	13.2669	12.2873	6.81497	3.5237	8.22464	6.41006	7.35633	2.49241	8.54326	7.27164	11.3964
ABCD3	28.4686	31.7536	39.2162	35.3433	30.7672	38.3596	32.9957	34.6723	35.0092	24.1129	37.619	33.5586	28.2651	28.6133	26.7237	30.834	49.1822	41.8954	36.5187	32.8635	45.2887	48.051	44.9958	40.8461	35.099	37.7166	34.9117	53.8468	45.8649	55.6693	39.6245	39.5761	45.4502	41.0442	44.2638	37.5915	30.7729	43.2652	39.0292	43.4964	36.1841	36.704	46.7778
ABCD4	3.97199	6.60881	6.38513	8.37349	4.81091	8.02649	8.34158	11.4851	8.61	4.36653	6.61402	9.78249	6.38838	2.08464	10.3231	7.53867	6.1213	8.8179	7.39599	5.99001	7.74787	5.82333	7.26821	4.25873	10.3505	7.11091	10.0959	6.87001	6.51746	8.03726	9.88824	5.13669	5.07743	9.42751	11.1795	7.79864	10.9145	9.65706	4.79805	3.93124	2.10989	6.37044	11.0659
ABCE1	26.9182	33.0001	38.6944	42.6648	35.2936	39.6946	31.8471	32.184	36.3623	24.5155	48.7004	30.5675	35.448	19.8304	29.0808	31.3511	48.1148	34.3402	39.6525	33.8683	35.0459	46.3144	38.4067	26.2472	38.3122	37.4532	42.3691	46.1431	54.9257	58.7411	49.98	33.8312	48.8379	40.4024	39.1353	39.7892	36.3342	45.2189	48.5081	41.1514	33.2331	36.1853	43.5857
ABCF1	55.2776	53.6528	64.904	57.9141	41.0443	60.0341	53.5444	68.8802	67.1003	57.0376	83.2621	53.5385	44.3893	57.8151	45.8471	59.8308	66.81	64.2992	61.3554	61.8544	67.4202	75.5725	69.2957	83.9501	56.9286	76.2324	84.1339	58.5484	73.052	58.3135	70.2431	57.2111	64.2762	73.6778	51.6628	67.8579	64.2728	74.8104	70.3143	91.3445	89.7074	55.5911	77.799
ABCF2	30.0772	26.2104	29.2122	31.085	21.4	31.7209	27.4416	37.1721	32.5719	23.014	52.6895	21.5416	24.1648	41.8518	22.5426	30.0875	34.4546	32.0552	33.2945	32.5289	29.6815	36.2071	32.5963	46.5587	27.3465	36.6127	39.9201	29.36	31.156	31.1806	35.9815	29.5189	30.855	34.2415	23.9283	30.0719	29.412	30.7806	35.1125	59.5504	34.576	26.6457	38.245
ABCF2-H2BE1	8.52739	9.55426	18.8959	13.1199	10.2227	11.4965	13.2737	15.7216	13.7909	11.0478	16.0117	9.84037	11.7042	9.35595	10.0245	11.4215	21.4704	17.7711	12.4078	13.3073	19.5011	15.5916	13.9196	10.4656	15.6521	16.0245	16.2751	14.3	18.8312	12.9749	21.4354	12.0574	18.7393	14.9432	12.7194	16.0158	12.7277	12.7392	15.3482	12.9763	19.6169	16.8054	16.2816
ABCF3	25.5122	30.7349	26.9139	29.1214	27.5261	22.167	24.0631	24.753	26.8302	25.1321	25.0587	26.6918	30.3323	23.6681	28.0492	25.9876	21.3534	24.4627	23.9015	21.1871	20.3431	21.8207	25.0843	24.3283	24.8523	26.0501	23.4231	17.5922	24.766	15.4513	25.1062	20.7916	22.813	24.5642	28.3677	22.6175	25.3335	18.488	23.2914	28.1727	28.977	20.2964	30.2103
ABCG1	0.756827	2.59537	6.02377	1.81506	2.29854	1.52881	5.37325	2.90852	3.87925	2.56697	1.17037	8.27051	4.13835	2.93517	2.29885	3.40009	1.87721	3.95512	2.57152	1.39182	6.69027	3.16583	4.65255	2.89794	3.01419	1.34003	17.5723	2.85886	9.81784	4.54411	10.3304	1.21806	9.55017	3.4721	7.86932	8.77935	5.73151	10.4959	5.53808	5.64727	6.38457	3.96021	1.4092
ABCG2	30.7204	32.7471	45.3025	30.6596	31.9202	39.3641	34.3153	24.6776	25.8827	25.3478	39.1282	15.8919	16.2532	14.0604	41.9179	36.3592	35.7271	18.4246	36.17	35.894	22.2966	41.5899	29.764	18.3566	41.1042	28.1022	37.2483	42.5848	16.1273	26.2687	22.365	34.7533	50.147	38.8175	7.29146	33.3372	29.795	41.2472	47.8738	20.6534	25.0731	19.0523	38.2799
ABCG4	0.355325	0.722146	0.618837	0.252594	0.45035	0.82846	0.468175	0.396503	0.370649	0.347766	0.662533	0.332512	0.348985	0.826291	1.29786	1.12121	1.21093	0.37281	0.201361	0.920066	0.930473	0.987714	0.213341	0.764371	0.133433	0.806338	0.185565	0.571682	0.677181	0.748252	0.195999	0.687586	0.286586	0.550828	0.199964	0.37716	0.578996	0.859733	0.779665	1.4983	0.100917	0.500725	1.23584
ABCG5	0.046736	0.50828	9.35396e-05	0.033084	0.146644	9.58231e-05	9.85261e-05	9.47635e-05	0.0265709	0.0516214	0.114648	0.248259	0.0468371	0.000103314	0.117886	8.94826e-05	0.0995941	0.0172998	0.0305983	0.00782255	0.0508967	0.0140452	0.0378301	0.0321588	9.35412e-05	0.0196738	9.8385e-05	9.76526e-05	0.042672	0.00010431	0.025677	0.0222031	0.024098	0.0183604	0.113941	0.0890772	0.126949	0.0581083	0.0187735	0.0372934	0.000105181	0.0248436	0.00010788
ABCG8	0.0231751	0.725453	0.0234263	0.0245821	0.326264	0.00831458	0.0439342	0.0402991	0.0787217	0.0425932	0.0851324	0.0507783	0.0604748	0.0175065	0.149993	0.0148798	0.0394882	0.0256369	0.0202206	0.023038	0.008473	0.00692664	0.074792	0.000121546	0.00773007	0.0388398	0.00882419	0.00841466	0.0211666	0.0559784	0.0460085	0.0192418	0.0475973	0.0272087	0.390968	0.00890412	0.0628712	0.0144532	0.0370618	9.46079e-05	0.000105181	0.000110453	0.0109537
ABHD1	0.855234	0.473232	0.471576	0.791949	0.525256	0.282424	0.493604	0.365677	0.370836	0.721527	0.415335	0.479692	1.05259	0.597934	0.774196	0.438426	0.218991	0.464566	0.376358	0.595026	0.321854	0.261961	0.24537	0.48068	0.725353	0.665376	0.352741	0.369831	0.19878	0.301182	0.194075	0.331687	0.287994	0.237448	0.0895441	0.356017	0.21152	0.116117	0.261492	0.186089	0.565461	0.371107	0.241184
ABHD10	23.1438	28.6945	20.314	26.1415	36.4332	16.4321	19.7376	19.307	22.9367	18.3295	21.6793	24.4115	31.0525	7.8488	23.8497	16.5592	25.1429	26.6435	23.0802	21.5225	22.6407	19.1758	19.7674	12.3346	19.3184	23.7267	14.428	26.6159	19.2942	20.1148	15.675	22.184	18.304	20.7388	25.4984	19.4604	21.4801	15.945	12.7293	13.9889	18.6649	17.3932	22.7259
ABHD11	3.40655	5.84237	1.65513	3.15854	3.30872	1.87893	3.6123	5.10793	3.19074	5.04147	2.87921	8.85265	5.01425	4.33443	5.26236	3.23003	2.29945	3.67383	3.05788	2.83159	2.47806	1.39741	3.53369	1.93757	2.15549	2.84828	1.88403	2.87685	4.45039	1.82774	2.96962	1.58165	1.06421	2.63421	20.4065	1.91154	3.44611	3.58974	2.26129	2.99516	3.69841	2.20423	2.15136
ABHD11-AS1	0.0156399	0.0351318	9.35396e-05	8.98604e-05	0.0367248	0.0333109	0.0507145	0.121955	8.90469e-05	0.0172673	0.0716932	0.0727456	0.0610995	0.000103314	0.0674011	0.129598	9.66493e-05	0.0517049	0.0814453	9.61919e-05	0.0170271	0.000106291	9.55554e-05	0.0161402	0.0618177	0.0196738	9.8385e-05	0.0169037	0.0710553	0.0189217	9.71798e-05	0.143786	0.0121027	0.0183604	1.61029	0.0356892	9.21523e-05	9.95428e-05	0.0561147	9.46079e-05	0.0210443	0.173242	0.0220239
ABHD12	26.5379	24.3412	24.9464	22.6753	19.4538	20.7781	23.2661	21.8316	25.153	25.7621	21.9097	30.5726	20.2157	43.6058	26.1473	24.6021	16.489	20.767	21.0601	23.5031	28.1759	18.6761	22.2663	35.7816	21.8679	23.2564	25.3263	18.7368	23.4525	18.2119	26.1013	21.6861	18.9624	22.5166	36.1595	28.8981	33.3635	28.5183	18.7799	37.0968	32.7334	20.0129	22.7406
ABHD12B	0.270021	0.304318	0.204728	0.620635	0.671527	0.256383	0.244194	0.195986	0.166111	0.298301	0.138202	0.224362	0.264903	0.0509804	0.259784	0.278737	0.268799	0.282159	0.0726779	0.223658	0.163428	0.0127364	0.273058	0.154621	0.223342	0.245444	0.0267224	0.356706	0.178039	0.254195	0.235996	0.175997	0.127371	0.211413	0.00628212	0.0859183	0.183622	0.0840236	0.180181	0.215364	0.222259	0.167096	0.232626
ABHD13	18.2224	20.0651	20.2267	19.7141	17.7704	21.5899	18.0447	21.3257	19.3981	15.6827	25.3437	18.9812	18.8688	15.1041	15.1457	21.379	26.1878	21.5377	19.6779	17.933	21.9645	20.1215	19.49	18.7259	20.4617	21.6996	20.665	30.772	25.5025	28.1509	25.9847	17.4694	27.0374	21.5072	19.3875	21.5332	20.9738	24.4508	26.251	21.687	14.6156	20.6028	23.5379
ABHD14A	19.5863	14.968	10.6839	18.5926	21.2627	12.5084	13.689	16.1706	14.2033	17.2168	19.6968	19.6353	21.9793	29.9344	16.8998	12.2034	8.87914	13.1786	14.4085	15.8958	10.2938	12.4126	13.672	18.0352	12.4857	16.2211	13.0833	12.9142	11.5902	10.0778	8.72474	12.3178	6.00765	12.1435	27.7601	9.0063	13.6165	8.25743	7.61682	8.64731	14.3939	11.3133	12.0325
ABHD14A-ACY1	0.749828	0.618076	0.76663	0.936046	1.58597	0.273664	0.33839	0.288395	0.495538	0.340649	0.140311	0.568655	0.00957377	2.08032	0.570682	0.227967	0.147605	0.699284	0.0105159	0.337243	0.148677	0.497301	0.0354758	0.0137525	0.1091	0.263943	0.518732	0.179168	0.0246038	0.0492589	0.210096	0.425921	0.104172	0.22049	0.648337	0.345722	0.396747	0.257936	0.217705	0.0104278	0.495236	0.520681	0.30095
ABHD14B	53.4032	37.7816	43.3222	46.532	31.7874	46.1625	50.2654	30.3461	33.8785	45.3489	36.4886	27.1911	36.2862	30.5599	45.972	42.7963	18.776	31.405	37.2626	38.5714	34.811	40.6505	43.2633	36.5827	31.6791	31.6762	45.1257	23.9158	31.4862	27.5361	22.4929	43.2114	24.3637	34.7158	68.9132	43.4117	48.0134	28.129	40.0737	28.4691	41.8193	44.7411	46.2745
ABHD15	9.79536	8.93732	9.65369	12.6368	10.2837	10.3798	9.97145	10.8863	10.9239	9.67078	10.7246	13.531	10.037	10.7083	10.114	10.9685	10.7856	10.3904	9.57967	10.0598	9.83921	8.61374	10.4148	12.3505	10.4469	12.288	9.52146	10.7896	9.01179	7.92221	13.9918	11.1415	10.1961	12.762	18.1433	10.6955	10.2544	7.54123	7.95379	7.27246	11.6213	12.4161	14.3113
ABHD16A	41.5868	37.9191	28.6473	32.3237	27.8121	31.6553	43.5571	35.0356	36.5489	34.8309	41.6517	33.262	27.5173	34.2538	34.5996	36.5601	25.7673	42.5852	37.6026	35.1851	29.8527	36.2235	37.3606	60.3949	36.8794	46.1688	36.711	30.5235	35.3369	30.4825	43.731	37.4669	48.8349	39.1296	51.7612	36.5056	36.1556	42.7166	46.101	48.3654	42.7614	35.1035	46.8585
ABHD17A	66.7446	41.9172	53.2916	66.0063	45.0793	56.0829	66.484	61.3558	61.7154	72.7449	61.9788	46.6546	58.97	99.6375	60.3203	62.9511	37.6804	58.9759	61.1012	64.3427	52.0843	57.1257	63.7152	91.9514	53.1107	68.5225	61.4604	36.7956	60.2635	39.4977	54.6428	55.35	42.7586	59.1535	50.7454	54.0235	58.9302	42.012	42.0095	70.9752	95.7387	62.2179	60.9997
ABHD17B	13.1537	13.6558	11.706	11.7184	13.6569	10.2666	13.8792	9.86294	15.7845	12.3188	15.7701	11.9092	13.4975	15.5377	10.6729	14.0856	10.2535	14.519	9.96345	11.8495	13.4144	16.9077	15.5211	20.5709	16.5326	12.5745	13.8835	13.1891	13.1465	24.2667	13.3706	12.4385	12.8796	13.1598	17.6759	13.475	13.4151	16.379	15.3231	15.9292	12.4357	19.1322	13.407
ABHD17C	5.05321	6.48396	2.67575	3.26651	2.51602	3.58733	2.82194	2.68103	4.17099	2.40488	3.93766	8.9529	2.91353	2.53209	4.19037	2.55041	5.61175	5.31568	3.77294	6.49796	3.40399	3.96927	5.18859	3.62033	4.07389	4.69612	2.43333	4.4369	8.52927	6.79317	8.53513	6.26163	2.15925	8.28892	19.2737	3.20337	3.5098	6.75812	2.55798	6.91907	5.75836	4.42734	5.12846
ABHD18	2.97924	3.79648	4.40727	3.23849	6.54479	5.97441	3.30405	2.13781	3.69873	2.81709	2.89909	5.37708	2.39411	3.02448	4.60841	4.6211	4.19178	4.82869	3.85071	4.01792	5.37969	4.69975	5.76095	0.84607	4.55217	4.60803	4.09179	4.39693	5.10951	7.24919	3.43204	4.29045	4.80953	3.90303	7.56673	8.14799	5.41654	6.1183	4.21525	2.23533	1.73218	4.09958	5.05057
ABHD2	75.2244	76.7915	171.215	121.201	98.1114	104.273	201.679	119.172	104.403	95.4958	99.4918	68.5692	71.1946	59.3646	97.4878	158.612	180.231	152.074	129.139	87.3542	91.4192	124.794	140.932	176.29	115.8	331.592	202.885	211.495	203.864	199.106	200.471	101.351	421.324	234.741	97.6567	257.095	212.117	133.361	304.908	60.8049	151.468	391.132	393.1
ABHD3	11.3031	11.1838	4.92038	6.20085	11.729	4.41265	5.42945	8.37777	5.64755	7.63441	5.55797	8.3763	10.9263	6.48139	6.17356	6.0466	5.4157	5.30663	6.83545	4.07846	5.48003	4.25463	5.34085	4.96593	6.79232	4.26981	7.28237	9.39678	10.12	6.26709	4.48039	4.6917	5.37637	5.76836	3.10488	6.12606	6.59065	8.98342	5.56511	6.44248	3.71899	6.45566	5.45349
ABHD4	75.9678	59.8796	79.9517	54.9023	49.1585	55.3697	77.5438	55.9544	52.421	57.6291	43.9146	57.6411	54.7454	55.8972	55.9715	55.5094	45.7092	83.2776	61.8097	52.7866	76.9857	55.8854	78.0728	71.5233	52.4811	81.0455	71.9393	66.1992	49.316	44.8231	68.2214	67.9374	79.5287	61.2351	34.6925	92.4325	77.721	79.9071	60.5676	102.762	59.5928	74.2241	76.9034
ABHD5	7.90683	10.6015	8.6348	6.82545	7.16487	9.23269	14.6164	10.7571	9.59953	7.58914	16.314	9.71734	7.65781	11.1501	5.27813	9.61343	9.50327	10.9035	7.56778	8.68506	12.9609	12.8986	7.99839	14.1012	10.9274	9.73732	10.7207	20.1157	15.6093	18.2053	27.9697	8.65043	36.9391	9.62809	7.12249	9.00675	10.336	18.3787	15.9054	17.1433	7.83591	15.1332	18.5338
ABHD6	13.9033	12.2752	9.08204	12.062	12.8949	12.275	11.8531	9.48307	10.377	11.0803	12.8778	7.39734	13.7981	14.1398	11.1749	11.6313	9.55065	12.8207	10.6964	9.74095	13.0834	9.59498	12.4268	15.1595	9.49648	13.0688	7.22185	12.385	7.88697	12.5966	10.7959	9.49158	11.8043	11.309	9.96013	10.8867	8.22538	9.21295	7.30003	11.7021	10.2892	7.92229	12.6861
ABHD8	19.6684	14.878	13.237	16.2332	12.1889	14.7476	13.097	15.4561	16.5645	17.7784	15.7217	12.3683	17.7248	20.045	17.468	12.9509	9.09417	14.2782	11.1966	12.6791	16.4946	11.5079	16.7354	15.9226	10.1074	14.4991	14.9698	10.9913	10.4593	7.11307	10.6773	14.789	7.38919	18.9695	9.04322	11.9946	12.1361	8.12132	7.59905	18.8785	23.0122	11.6494	13.1497
ABI1	27.7901	25.7865	38.6528	31.1138	31.7708	34.7923	36.5463	37.1792	30.2518	27.1534	27.4369	22.093	30.4812	29.163	29.6401	31.0645	27.7631	32.7912	34.9824	29.7055	39.5641	28.8973	30.9781	34.2518	37.7472	31.305	38.7458	39.8521	28.9385	34.9579	31.3673	30.4234	43.0157	35.3973	12.15	41.2426	43.8624	34.4198	33.3542	25.1802	24.9877	31.7943	40.285
ABI2	14.2963	7.06008	5.00927	2.33613	10.697	6.85239	7.90205	11.3555	3.72371	11.9227	14.214	6.59585	7.44615	16.8278	6.80402	4.84498	0.793883	4.94735	4.44192	10.0088	7.87812	10.1725	5.95699	22.9998	6.15251	5.56224	5.45058	1.68413	6.86945	6.31369	4.58334	2.38446	0.7616	2.17939	1.2362	5.28235	3.52828	5.23898	5.52844	14.1794	16.7828	4.81903	7.66686
ABI3	16.039	6.81751	16.0419	9.1692	5.98405	7.50447	12.727	8.60168	9.62379	14.1404	11.9385	10.4909	9.58305	26.697	10.5903	15.6485	5.76299	7.609	12.314	9.6485	11.1062	9.75203	13.4025	17.8449	14.4445	8.17462	15.5299	7.99343	10.8656	6.48698	14.5777	5.63893	7.23118	7.4836	6.74631	13.1705	10.3872	8.8226	8.34507	14.4368	18.6865	8.59273	8.96328
ABI3BP	64.4921	73.8048	23.0228	53.2104	112.595	65.8909	50.449	57.5395	30.502	39.9928	55.8748	50.1182	88.4384	22.0938	64.9051	37.6546	28.3831	45.556	31.6225	44.6518	55.4161	44.3689	59.5089	71.7504	53.5291	37.8011	39.3453	39.2648	30.7565	80.1239	31.3393	53.3045	19.5648	35.7473	31.2913	23.9384	38.4503	32.4686	74.2686	51.1999	52.6665	48.7254	52.9993
ABITRAM	22.5914	23.6925	18.329	19.8626	22.3259	20.8758	20.2085	22.9505	17.6635	20.9389	25.043	19.955	22.2247	22.7176	21.5405	19.526	20.9941	21.6925	20.5423	18.4429	19.2042	21.5962	20.773	21.7694	20.6005	22.3845	17.9673	23.6799	22.0113	22.2234	20.0557	17.6462	25.1782	20.85	33.0173	20.4833	18.6269	18.1858	17.7372	17.9299	15.1391	17.8079	25.5104
ABL1	177.041	151.172	155.101	155.517	125.318	191.792	277.719	179.809	186.255	146.375	213.554	134.588	127.458	128.957	169.59	199.969	130.242	223.171	151.276	140.499	259.215	262.24	226.567	283.549	203.683	197.825	252.2	134.633	239.354	176.478	222.959	136.756	219.302	163.127	58.5824	180.283	185.042	282.586	375.413	264.63	161.032	180.058	219.669
ABL2	7.04303	8.42656	12.0223	7.83909	8.02778	8.11027	10.0631	8.33114	12.6957	7.13824	6.41979	9.05333	7.21534	10.927	6.86121	13.8013	8.95114	8.99662	9.73072	7.9673	10.5788	11.4969	7.63083	8.65381	11.1571	8.93764	10.8289	8.4394	11.1548	19.119	7.9424	6.54625	9.97082	7.98978	4.79557	6.88546	7.40042	9.52498	16.3214	8.89144	8.62456	11.0786	6.25137
ABLIM1	9.58165	21.6062	38.2306	11.2066	20.0252	39.2549	36.192	12.5736	14.4811	11.4991	9.00099	12.9106	11.5789	2.74755	15.7353	20.4934	28.7352	37.435	20.4674	9.05146	36.6742	16.9958	38.0836	8.03427	20.5557	53.7667	24.9012	40.4728	32.1551	19.0195	31.595	26.0652	90.5513	27.6711	12.5169	47.9131	35.0123	65.1754	47.2978	16.5323	14.427	33.6114	49.5644
ABLIM2	0.689488	0.00425666	2.01348	1.111	0.851221	0.32617	0.219846	1.11284	0.748208	0.632625	1.04668	1.23138	0.694057	1.98948	0.263627	1.02679	1.54165	0.202223	2.04157	0.73122	1.08021	1.87863	0.450377	1.83266	0.361494	0.0681068	1.1929	0.425106	1.1669	0.476868	1.91207	0.897179	1.5108	0.738974	0.293233	3.17764	1.1253	0.204335	0.0017294	0.294829	1.48389	2.53367	0.723086
ABLIM3	15.6011	6.45698	48.124	40.2973	22.0194	10.6581	49.1647	28.4961	30.4541	30.1954	10.9733	4.90883	36.9784	19.3703	17.6813	41.968	20.4964	28.3306	30.0527	16.7437	10.2512	20.048	24.6167	36.1453	20.7514	39.9775	22.0276	43.9164	24.3342	32.2145	22.8953	20.8162	38.9326	28.6166	5.45709	30.9481	36.5786	11.893	14.022	6.74366	33.853	42.2152	45.7486
ABO	10.5572	16.7706	13.6495	12.5049	11.1019	11.1105	16.6654	7.21018	7.52095	13.5871	7.41703	22.1932	11.0895	14.9459	25.3606	19.8049	9.55185	10.8033	11.8983	11.0179	11.9561	8.11759	8.79224	8.98657	10.8636	13.3642	7.93456	13.4954	17.9951	6.2851	10.8713	11.4234	8.40879	7.7412	138.16	14.1657	15.2018	9.91959	10.1196	3.47818	6.19808	6.65331	10.1034
ABR	29.8698	37.6583	91.1415	67.7335	72.5765	36.7669	48.7804	46.5482	60.0108	32.7688	41.5981	32.1192	36.3493	8.61559	48.8934	50.5767	59.2338	52.1123	40.3776	39.0455	52.2695	49.0665	63.4233	16.1402	45.1168	53.3869	57.8741	62.8994	40.9724	69.1399	40.953	42.7089	41.6858	52.8092	66.9963	39.4372	46.7553	43.038	43.322	34.0451	29.075	67.8575	50.1139
ABRA	0.0778321	0.140276	1.55598	0.181558	0.0611513	0.149564	3.23952	0.467227	5.49508	0.360809	30.6988	0.174482	0.39668	1.00235	0.117886	1.95268	0.736378	0.15492	0.488222	0.255066	0.914571	12.8172	1.24534	10.0438	1.77466	3.79605	7.15875	7.89895	3.03711	17.9895	0.742274	0.0664151	20.2121	0.657366	0.0814118	0.996672	0.422948	14.9373	2.52064	0.334884	0.628279	3.46274	0.723337
ABRACL	6.18821	3.89041	5.41035	3.8934	2.62594	7.0583	6.1626	8.48972	6.87214	5.96053	6.27156	8.50235	3.37114	8.15873	3.24798	5.54903	8.95487	6.7435	8.52205	7.34014	4.99586	9.17879	5.15086	12.4306	5.87932	9.15734	8.74564	6.77295	11.1831	8.39265	9.86768	6.72033	12.1273	11.8126	5.66018	8.8625	8.09779	8.75942	5.86268	8.31402	9.27613	6.25758	9.9719
ABRAXAS1	20.7988	29.5196	17.9284	23.4253	36.5455	29.5433	16.8855	16.6676	17.074	16.1215	11.8568	18.9748	20.172	8.01768	34.6922	15.1393	24.5453	12.7588	16.3694	17.07	23.8732	18.3425	23.3355	8.51336	19.8361	12.9008	17.1646	20.184	13.1569	19.6448	14.0648	21.1996	15.2693	17.2332	18.9505	19.799	20.6706	19.5549	17.4116	10.9339	11.1278	13.7608	17.8253
ABRAXAS2	22.9179	24.9017	24.1164	27.9956	27.0647	26.5224	26.8392	28.7186	20.0204	22.1413	27.7778	21.1758	25.8855	21.0472	22.5839	22.9928	26.8047	26.3028	25.8914	25.4662	21.4057	25.3311	26.2067	21.8335	23.2084	27.8631	22.7279	28.8729	27.0919	29.7315	27.5703	24.2615	31.7036	27.0392	22.8112	26.5339	24.4623	19.491	26.251	23.4539	23.3682	20.9243	28.0965
ABT1	39.5077	34.7677	22.313	29.8928	29.2753	26.7382	28.2944	30.973	26.6806	33.2034	30.7274	28.341	33.9547	40.5119	30.4933	28.8008	23.7402	26.2856	26.766	30.5733	20.6436	21.61	26.3954	29.8108	27.205	27.4718	21.1587	19.6968	24.9206	21.2073	22.9232	22.5925	19.5284	27.4043	30.0165	24.256	27.8875	17.4897	21.1726	30.2613	31.4088	16.596	24.2611
ABTB1	56.3713	51.8133	34.9509	29.6974	39.7681	33.4681	40.2998	42.7678	34.4042	68.0121	15.6941	39.6759	48.0783	45.7028	45.5605	40.755	14.5256	27.6765	23.6845	27.0298	34.7944	18.6746	36.3843	31.0118	35.5069	23.361	25.0009	18.8437	13.5456	16.0943	16.2428	36.2302	17.1089	21.6135	27.8977	32.5954	37.8901	23.6712	28.7152	33.3402	37.2826	30.3532	22.904
ABTB2	20.7101	37.3087	18.9183	8.3971	11.1997	15.9599	13.9322	16.7762	17.1074	13.1234	7.91818	24.9256	13.9267	8.33456	20.2111	15.3419	15.86	20.9872	11.0746	12.0378	38.0187	9.77141	12.7732	14.0004	16.1718	11.9358	19.2368	10.4031	15.6393	14.1131	37.168	6.58769	11.8754	11.2101	5.53819	27.4949	29.8326	35.7045	34.4661	40.8072	16.6467	17.6595	13.8291
ACAA1	30.3434	19.7762	33.369	22.5958	23.2666	27.1189	30.07	28.1096	24.0842	27.4012	25.9033	27.0404	25.8789	37.3826	20.6779	25.1934	21.7981	28.2051	27.2722	25.4507	25.8542	24.689	25.5248	42.4004	29.9867	31.2004	24.2465	22.9723	26.647	21.0295	26.4642	29.3831	26.9735	24.9653	20.321	30.8904	27.8382	20.8296	23.631	27.9892	44.7632	26.9436	28.3557
ACAA2	36.9423	32.6473	35.3259	33.2912	31.8279	49.9722	39.2781	40.3359	33.3938	45.0212	40.1775	27.7742	36.5478	46.3319	32.479	36.2824	32.8542	38.6886	35.0439	42.0083	49.0433	43.9503	39.4138	55.9211	33.8867	40.7185	31.3501	34.9063	33.2227	41.0972	43.9488	41.0289	37.5333	38.1396	25.4054	38.4216	40.9326	37.4737	32.543	49.5861	47.5738	39.4494	46.7032
ACACA	18.7927	18.2127	33.4378	26.8957	25.3532	29.5342	26.6871	25.7626	27.1254	14.7685	33.2056	17.8094	15.2485	15.7685	27.0531	22.1339	39.5261	43.4525	34.7132	27.7075	25.1674	54.4457	30.126	22.532	24.3971	38.5429	35.8908	44.7523	38.8112	40.6767	41.617	26.7414	57.3081	34.1082	23.9723	23.0342	27.315	34.2721	26.2604	15.6774	20.3012	50.5563	58.4944
ACACB	110.733	115.133	180.955	141.149	135.091	115.19	146.711	107.359	98.3936	131.628	77.6488	81.5638	144.803	97.9915	119.23	133.185	75.6779	116.358	123.843	87.2384	132.718	126.572	126.411	79.5646	119.174	115.052	171.808	147.389	67.8219	92.3557	58.4465	109.745	188.206	94.1896	37.1973	228.856	144.088	83.5907	110.474	88.775	77.1817	141.647	113.591
ACAD10	16.8961	21.854	17.1954	17.336	16.8235	15.5571	18.2898	16.0902	18.148	17.2609	18.9551	24.2738	19.008	16.2838	17.768	15.8023	12.9108	16.3621	17.2284	15.1678	17.5118	17.5142	14.2123	16.3696	16.1009	16.5499	20.3412	15.1776	11.9493	14.4504	12.7819	17.2252	13.1684	15.2001	28.612	16.0346	17.8798	19.0271	18.5748	16.3643	16.1701	23.1747	15.1822
ACAD11	60.4572	72.4304	68.3007	65.4509	65.5739	67.4323	75.9547	75.7515	67.4568	79.4774	62.9204	55.3876	57.8272	33.4388	75.1561	76.5799	90.719	85.545	74.7535	63.7748	78.6438	74.0137	76.1953	49.824	85.9036	53.8438	100.132	85.9047	62.2895	72.4189	68.5956	90.4474	94.8523	85.2759	13.2939	103.898	73.2355	67.1195	92.199	92.1284	42.308	95.619	93.7292
ACAD8	21.6274	23.5173	19.4134	19.0707	20.8481	18.4013	21.0057	20.1883	16.8161	20.269	16.9531	18.6615	18.0909	17.1613	17.2156	19.5858	16.4968	19.2153	18.6304	20.3977	15.8172	15.5322	15.6599	19.5589	18.0853	20.6039	16.7683	15.2264	15.8947	14.9223	14.2786	20.6637	18.9766	20.43	15.8174	20.2875	16.2166	16.0105	20.7432	22.9517	20.3529	18.5994	24.0858
ACAD9	41.9523	39.9945	36.016	33.8665	32.3419	34.6363	35.4017	44.3351	34.1401	41.9842	42.0272	37.5495	37.2764	49.2064	38.4238	35.2416	38.102	33.333	42.4113	41.3035	34.5378	34.3205	41.4784	45.14	37.1598	39.863	38.5876	28.9043	33.1234	29.8065	32.7778	33.0653	35.2783	35.2372	38.2189	35.4108	37.7712	33.2036	33.6142	35.4278	45.1958	36.7063	40.4762
ACADL	0.404341	1.19172	2.05104	2.44166	5.15408	0.465107	1.83493	1.09684	2.44966	1.49449	0.916479	1.78773	4.31687	0.404518	3.31529	1.3151	0.815976	0.739807	0.945845	1.39857	0.20331	0.372215	3.03773	0.881146	0.98768	1.46761	1.23435	0.958044	1.58956	6.52973	0.430223	0.983815	0.443932	1.05903	0.740129	0.142465	0.74009	0.783217	0.354845	0.260486	0.649218	0.964701	0.394596
ACADM	34.0661	38.8242	34.4696	37.8432	40.9662	33.1307	32.6682	44.8723	30.1527	29.8533	41.3051	35.8884	34.5005	25.3356	33.3264	31.1975	32.8912	37.3205	35.5131	37.8494	33.3595	40.5219	35.449	35.0912	39.027	39.2184	31.7036	43.1661	36.1285	52.1776	31.9641	35.926	43.8902	38.0391	46.3475	32.4097	30.4933	33.9298	36.853	23.0901	29.9772	33.2759	39.9806
ACADS	16.2745	10.671	12.4937	11.4962	9.27072	13.2255	15.3204	12.7571	13.5849	17.5629	10.1227	10.8906	11.317	17.5473	9.537	13.0484	6.70447	10.648	11.6265	12.1144	9.83618	8.51372	10.4858	15.6913	8.58297	13.7277	10.4705	9.69445	9.16255	7.90285	9.06408	12.111	9.83076	11.2952	14.466	12.1252	10.8247	9.78847	9.31629	13.4992	17.922	12.5961	13.8482
ACADSB	22.5632	38.4062	42.3162	45.3232	59.8727	35.5238	29.5409	30.3196	29.1131	23.2194	26.5685	28.8733	38.7367	11.5843	34.0933	24.9677	35.4167	34.0921	27.9937	23.904	41.6364	29.9823	34.1842	13.0473	30.7656	35.7204	29.8546	49.9004	23.1653	40.7148	23.6823	29.9025	43.5489	31.2571	37.4785	30.5277	36.7932	33.1219	35.5098	20.6971	14.9434	23.4922	26.8234
ACADVL	183.708	124.172	198.595	220.455	139.773	216.853	231.015	207.334	202.209	263.288	212.136	176.361	156.067	306.684	165.787	219.851	211.269	214.282	237.23	215.113	206.439	248.807	180.868	401.327	211.651	205.923	249.741	136.317	144.986	177.719	202.342	234.238	260.097	218.968	148.066	184.498	237.632	211.035	224.518	336.353	340.681	302.582	259.324
ACAN	0.644834	0.284405	2.11046	0.176815	1.20125	0.868287	3.79112	0.472224	8.02797	0.507198	0.218204	0.444599	0.76187	1.26358	0.11371	1.6684	0.979321	0.800645	1.36874	0.872826	1.4908	0.770114	5.49286	2.97948	0.880703	0.948389	0.975812	0.433479	0.624725	4.79918	0.372518	0.411091	0.421992	2.43484	0.12319	0.363123	0.364403	1.30536	1.65993	0.229831	0.829142	0.620449	0.441791
ACAP1	7.30767	2.54106	2.33393	4.53678	5.19072	4.55056	3.1636	2.98568	6.3425	8.39967	4.09516	21.3212	6.07104	8.56314	3.29846	7.83037	2.02984	3.76746	4.44412	5.49354	2.76046	4.0933	5.3584	5.04599	6.55829	4.12869	4.31997	3.56299	4.30016	2.277	11.3352	4.33288	2.3032	4.14451	6.38395	3.0966	5.13779	4.61179	2.65133	4.33375	6.97283	3.75954	3.98882
ACAP2	43.5346	57.6015	68.0585	59.5215	58.2696	57.7944	45.9468	52.3392	51.2161	43.2176	46.6351	49.0517	52.5031	34.5336	50.4686	56.3861	73.6282	60.7595	52.7793	43.7699	69.5344	54.2453	58.866	40.9757	55.7216	50.6779	56.758	89.358	54.0844	72.5975	61.508	60.449	83.847	58.7339	46.1184	54.2779	57.5931	66.5071	63.5362	50.1441	36.8111	57.0346	63.4251
ACAP3	79.4195	53.0628	60.1848	143.954	85.8471	70.6984	90.8305	110.284	94.13	118.144	110.323	63.7017	94.71	149.721	80.1204	87.7172	60.4349	79.4931	92.7349	87.308	58.73	86.4947	75.5824	104.682	76.569	93.49	86.1508	65.5942	69.8229	56.2452	71.5105	67.4124	62.7353	92.2178	16.6144	58.9404	68.9045	53.2521	56.8708	88.1426	112.401	101.48	108.747
ACAT1	76.2633	65.9779	77.6532	64.5861	68.2601	58.7742	73.6337	84.3073	56.8435	75.5448	82.2164	47.8308	64.5383	95.8288	60.5657	67.1752	68.4146	70.7542	68.247	77.086	75.2245	62.9003	78.6766	110.497	68.0819	76.7604	57.6219	78.6189	61.4073	86.353	66.2731	69.0151	79.2888	66.3472	42.3532	67.9274	69.7291	65.2889	63.3682	69.4502	100.11	74.2489	76.5309
ACAT2	15.9722	16.085	11.5774	17.9003	14.4848	8.08237	12.5576	14.4584	12.133	12.7487	17.4469	12.3472	15.1624	29.9901	12.2474	12.2686	13.1215	13.8258	11.6345	16.87	7.91797	22.9104	13.5884	15.496	11.9291	12.0943	8.20546	9.82004	20.5347	13.3259	7.5795	14.2919	8.93137	12.1467	13.0577	8.04167	9.42274	9.21838	9.01835	5.97839	15.576	13.1375	18.1086
ACBD3	38.8996	45.0835	59.5324	59.2392	48.1231	52.5483	48.4023	48.2089	50.7561	40.2116	57.5708	48.0277	44.0221	31.1021	40.9669	48.0515	65.3361	56.9967	50.5422	44.8336	52.9162	68.1626	51.3002	43.6989	56.0907	58.6906	63.6521	67.2559	89.1111	72.8529	62.9734	50.655	74.654	62.5212	52.3231	54.5512	51.3525	62.1535	58.063	40.5141	42.4398	64.3471	61.4007
ACBD3-AS1	0.017312	0.0935086	0.0277978	0.0184986	0.0706433	0.114462	0.100652	0.0684264	0.102613	9.019e-05	0.0323014	0.0648276	8.48689e-05	0.0380305	0.0778883	0.125858	0.133456	0.0987582	0.0914577	0.0335641	0.0391061	0.0162126	9.55554e-05	0.000121546	0.0167908	0.146814	9.8385e-05	0.0190547	0.182708	0.0833368	0.111855	0.0122114	0.0526603	0.101614	7.38465	0.0648834	0.0246765	0.206074	0.152203	0.107171	0.024904	0.206552	0.0520155
ACBD4	13.2266	11.952	11.0272	11.783	18.526	9.37723	10.2714	11.7288	12.7304	14.4183	7.15562	9.02393	19.3967	7.32929	17.3477	11.3618	7.94872	9.07325	8.92339	8.32352	8.80213	4.0278	10.3351	5.15525	8.74995	7.84852	11.0644	7.8955	7.75422	5.73828	5.62989	7.86737	6.64664	7.25013	6.06787	12.1114	11.7847	7.21615	7.13249	9.24487	10.3017	8.58227	8.65977
ACBD5	0.886011	1.94458	7.91171	1.63142	1.71123	3.0222	2.45315	2.24461	2.87181	0.821027	2.9611	2.41182	1.77691	0.351264	1.4845	2.29161	3.31469	4.03064	2.94702	1.92861	5.71444	4.09896	1.38952	0.869458	3.86218	2.26892	2.75702	4.25918	3.17735	6.90781	3.40857	3.53252	5.3404	3.10742	7.8483	6.5362	6.17079	4.71856	2.44913	1.07757	0.913368	5.62904	3.36843
ACBD6	21.2543	21.4845	23.9278	23.4919	20.555	23.4167	24.1819	32.4556	22.9467	25.9203	30.8419	22.5856	21.3399	36.7842	24.0648	21.1897	27.3221	23.2235	25.5965	32.698	24.9959	30.3201	24.6596	42.2893	27.3902	28.4306	27.8942	24.621	22.8202	25.3659	21.1437	28.3511	25.562	28.1711	19.3469	24.1315	26.5343	21.2603	22.1061	28.2154	33.3352	26.9592	24.8529
ACBD7	0.699754	0.350564	0.235835	0.511499	0.720668	0.415285	0.189908	0.243816	0.529727	0.429517	0.229196	0.93024	0.579723	0.140769	0.807853	0.239182	0.25879	0.172123	0.325511	0.224161	0.220245	0.220615	0.717052	0.176326	0.617335	0.176208	0.42327	0.168158	0.383271	0.225913	0.531428	0.23221	0.407946	0.182676	8.76525	0.231445	0.296091	0.551183	0.186809	0.74407	0.397948	0.296908	0.065856
ACCS	22.9707	25.8792	32.4198	25.9067	27.9198	39.1495	45.8024	19.4321	16.8347	31.9691	12.712	20.0598	21.405	7.20279	36.7089	32.4361	17.7421	25.5427	20.5883	19.977	40.3732	30.6298	26.0547	15.9443	33.1234	35.4525	40.5346	28.2792	19.9851	21.8381	13.8043	32.0574	33.2084	34.7394	17.5065	40.8093	37.5679	24.3647	42.172	13.4374	32.7948	35.8169	48.2407
ACD	35.0082	25.0616	19.4258	23.7738	23.1784	18.143	21.0062	28.0937	24.4365	35.9211	22.4972	22.4099	32.5874	33.6283	32.1944	23.6021	11.9785	16.1546	17.7797	21.9333	22.1372	17.9089	22.7835	26.1931	23.0748	19.2457	25.0993	12.1986	15.5148	11.8228	12.1572	18.0829	9.50708	18.7144	18.0653	21.5893	24.0019	17.6298	16.3175	23.457	23.1174	16.6724	20.3198
ACE	12.3485	12.2275	60.478	32.2447	12.8741	46.8749	36.7879	34.9437	47.842	21.4073	10.7461	25.02	19.4021	11.4851	16.0272	38.5063	25.5833	55.5571	50.2057	33.2079	62.7492	34.4765	35.2918	22.1163	30.5836	20.98	38.1855	15.1576	26.2912	30.4382	59.3117	37.4477	25.1767	22.0285	32.6675	29.8547	45.8904	26.0959	28.2571	15.8938	44.5166	24.6114	28.8365
ACE2	0.499968	0.785434	0.803945	0.675128	1.10668	0.566395	0.45868	0.395839	0.160222	0.602544	0.516242	0.793015	0.980906	0.462628	0.623105	0.553315	1.21441	0.516698	0.369049	0.587236	0.676543	0.389489	0.386107	0.780432	0.330747	0.781689	1.46024	0.409432	0.345754	0.29343	0.624566	0.640818	1.40248	0.444785	1.58468	3.485	0.535652	1.04563	0.624187	0.380626	1.08131	0.915771	0.869543
ACER1	0.17112	0.24542	0.141538	0.115569	0.219924	0.0831336	0.151947	0.243816	0.185462	0.0859755	0.214877	0.116347	0.0610995	0.211102	0.168372	0.219258	0.0995941	0.103313	0.0611065	0.115992	0.0678315	0.0690154	0.207635	0.144289	0.169835	0.137074	0.17642	0.067322	0.0568637	0.113008	0.0169648	0.199051	0.0840743	0.200934	0.0895441	0.106873	0.253806	0.145121	0.149468	0.13029	0.251375	0.173242	0.065856
ACER2	0.948523	1.85763	3.85446	2.63962	2.50381	1.7605	1.51858	1.17808	2.86013	1.18531	1.31739	2.95044	2.57795	0.58035	2.03633	3.20792	2.28854	2.90733	2.17634	1.06633	2.20162	4.12087	2.77358	0.432624	1.82096	1.93721	2.11596	2.43698	4.0731	2.82271	2.69892	1.81279	3.41876	2.11795	15.9557	3.9686	2.85437	3.36461	1.82982	0.74407	1.5496	1.65723	2.47662
ACER3	9.07465	8.74921	11.8319	6.28289	9.42558	14.5118	9.60206	6.94633	14.6953	6.55302	15.2449	10.7746	7.29699	8.00956	12.2272	15.5736	17.3758	14.3541	12.8411	8.05828	12.9597	16.0935	10.8364	10.3879	11.3673	16.502	14.0188	16.9612	19.1945	28.2245	24.2836	14.5125	25.9639	11.4291	7.89588	13.3557	16.2832	14.6958	18.6403	11.8179	7.16693	22.9723	16.0466
ACHE	1.34232	0.894997	0.253662	0.839072	1.74274	0.828634	0.261915	1.41257	1.08586	1.40578	1.58268	1.70027	2.85955	1.48932	2.11725	0.983847	3.74875	1.09816	0.579917	1.29312	0.672705	0.88971	0.414166	0.865224	0.608451	1.36956	1.03068	0.396563	6.13205	1.20348	0.926556	0.718402	0.337395	0.906772	0.163792	0.697172	1.54062	1.37626	0.498536	2.58154	0.159064	2.59751	0.615534
ACIN1	135.812	86.5908	47.5925	54.5563	45.6607	76.3758	73.6072	91.0233	71.4912	115.48	101.167	92.0008	93.0438	143.377	87.6611	72.3859	58.88	59.8608	82.4579	104.769	68.8187	72.0476	66.8125	142.972	74.9779	70.269	75.1282	40.2349	58.1957	46.6313	57.1649	69.0963	28.874	70.3253	55.3873	62.0585	66.8779	66.4078	43.2937	158.305	119.581	59.6477	57.8194
ACKR1	86.8557	21.5888	289.51	95.9284	35.2474	43.1215	127.81	97.5696	133.583	284.009	73.5664	20.9003	82.64	528.12	75.1157	279.271	63.9275	45.852	148.887	93.6371	84.0141	209.719	72.8222	350.702	371.779	92.381	200.645	88.3485	148.03	177.265	48.7644	78.87	65.4175	50.8186	2.94074	77.9473	68.6777	145.259	179.25	43.5703	212.727	117.389	101.369
ACKR2	0.668658	0.50828	1.76815	1.31986	0.91608	1.51138	1.48062	1.05622	1.35067	1.37426	1.53217	3.47366	0.533963	1.12543	1.39685	1.77336	0.597082	0.653794	1.55601	1.13587	2.11694	3.01832	1.50948	1.89032	4.30536	1.11541	5.20158	1.34458	4.584	1.48668	2.73266	1.21593	1.95534	1.00426	3.76535	2.90084	1.12066	3.77067	4.48105	1.71124	1.98932	2.54762	0.657589
ACKR3	13.4181	17.1911	26.3206	30.0578	19.81	29.5781	21.2209	18.9291	46.4626	30.5066	27.1048	33.9946	20.0434	11.4468	12.4195	35.1268	15.462	21.6581	16.1288	18.582	18.8655	25.7583	37.5648	32.9985	15.8015	26.8848	22.4987	15.4617	28.0712	71.6566	27.5113	15.8667	37.3773	15.884	50.3635	27.0678	10.2755	47.3932	43.708	16.8697	26.9697	17.7585	10.6075
ACKR4	3.83439	2.1118	26.9985	12.4639	4.53498	3.08119	19.4012	13.3059	27.4887	13.6444	4.8208	0.0316829	5.63461	45.8478	1.10247	55.0791	1.72078	10.3098	10.9778	5.48685	8.29731	14.8699	12.9019	12.4419	13.384	14.9881	2.80095	10.3109	5.66798	26.7096	6.83037	7.34066	8.40038	8.16149	4.19835	5.18454	4.26401	9.15986	10.1901	1.97192	17.754	14.8465	4.40331
ACLY	20.3584	17.3498	39.8207	29.696	17.5324	34.5553	35.115	34.4108	37.8454	25.1678	38.8672	26.254	21.0536	28.2116	24.8581	26.3475	34.5013	42.4796	36.3279	28.3809	33.9326	35.8685	27.8787	40.3222	31.9994	31.7624	36.8153	26.9219	46.5857	35.7034	49.2987	25.9705	36.1524	29.5012	45.6209	35.4246	28.3679	42.8618	26.6007	48.3909	39.9324	34.4243	40.8352
ACO1	33.2962	30.8439	43.0419	42.8867	30.2516	27.3008	45.6134	37.3551	37.6925	23.8932	48.7671	24.9306	22.7582	32.4276	28.7339	31.0295	37.4175	46.0046	47.6764	44.2313	50.9908	56.1152	41.4101	56.7751	37.626	54.6589	49.4702	56.7926	43.1099	51.033	45.3316	43.8919	48.9028	49.5504	15.2225	38.055	41.484	49.3218	51.0852	55.0273	45.7594	51.5478	60.3657
ACO2	76.7063	68.1863	80.0698	74.165	53.586	78.5861	86.1346	78.8728	70.7484	70.0819	104.377	79.0486	66.4569	96.853	68.8309	80.1922	84.7691	95.4875	96.6055	76.4751	82.4549	112.754	81.4222	140.014	78.7507	116.28	104.28	70.6973	86.2768	78.8943	73.9566	72.0121	94.7692	91.7932	156.927	83.8439	79.0804	93.295	81.6682	88.7515	93.091	98.3754	98.3343
ACOT1	1.53747	5.10694	3.55126	6.28617	5.49157	6.37502	5.70731	5.03404	5.31787	7.70466	7.6417	2.92506	4.99696	7.11593	5.57296	5.58007	10.3795	13.1101	9.27463	14.6842	3.88946	77.2216	10.582	23.8069	6.37961	6.42438	5.37019	11.8459	8.5624	6.19492	1.56023	13.0879	13.0997	8.52522	1.50844	7.17434	8.72988	7.84793	5.32561	10.3981	19.9424	3.69114	9.2526
ACOT11	3.55237	5.5205	6.90303	4.52191	6.86536	6.18729	4.3174	5.06116	3.50781	3.26504	3.34134	4.80865	3.4833	3.85832	6.85047	3.53753	5.72365	5.26687	3.18165	3.19026	4.07104	2.97027	4.86014	2.07421	2.04327	3.81496	3.85035	6.56786	2.86425	3.20718	2.47273	2.48213	6.3995	2.74182	4.8471	5.0283	4.20963	1.78801	7.23481	1.26239	1.88345	7.65753	2.70135
ACOT13	13.5598	15.4238	13.1097	15.2598	18.7792	15.7871	12.9315	16.009	14.3268	11.8976	21.651	14.2902	13.768	18.7208	14.0203	10.7163	16.6767	16.6492	16.6077	14.9804	13.3098	18.739	13.1252	19.0588	14.0914	17.3629	12.2242	14.6976	13.4363	16.1535	13.4683	14.4817	17.351	17.6932	16.1515	16.3101	15.258	15.2061	14.3622	17.1857	12.8009	10.5155	15.5022
ACOT2	10.6538	6.68228	13.4387	16.3169	8.34472	21.7894	19.9181	13.2412	13.3162	13.9042	22.9546	7.98241	9.53458	21.4776	11.2031	11.4729	22.6481	26.9472	26.073	28.1822	10.8491	48.3992	22.4378	60.9446	14.2991	22.801	25.0947	22.3349	19.3484	23.1187	17.3398	42.3118	37.2832	38.4176	4.97687	16.3337	15.1674	18.168	18.1575	23.6289	43.1513	22.3532	26.231
ACOT4	0.466533	0.613424	0.943058	0.758955	0.891654	1.14602	1.1263	0.548467	0.873992	0.687173	0.973753	1.42439	0.39668	0.932015	0.589083	0.707405	1.95025	1.68595	0.945845	1.24404	0.745224	0.606506	0.679317	2.08254	0.54018	0.88061	0.617223	1.29417	2.00112	0.88452	0.674804	1.40936	0.995714	2.24575	0.772658	0.427201	0.697805	1.53733	0.896293	0.669673	2.53374	0.692637	1.09591
ACOT6	0.046736	0.0176078	0.0933069	0.0990723	0.158554	0.0950526	0.215216	0.14226	0.157253	0.0687984	0.10033	0.0872795	0.16084	0.123186	0.0280179	0.0704942	0.0597951	0.189325	0.0611065	0.107195	9.22969e-05	0.0138881	0.0157528	0.064196	0.000133606	0.0783739	0.0177305	0.121895	0.0568637	0.0677193	0.0338325	0.0704738	0.108065	0.0366177	0.0326179	0.154408	0.0384553	9.95428e-05	0.093456	9.46079e-05	0.0419834	0.173242	0.0220239
ACOT7	5.32818	3.60067	4.13221	7.3525	3.5267	4.75356	5.81692	6.38187	5.47169	6.10065	6.57939	2.62585	5.19862	7.84719	4.98689	5.76013	5.55986	6.32665	4.1019	4.33083	2.77123	8.94991	7.53742	7.91067	4.4486	9.81319	4.89664	5.36132	8.04835	4.05486	7.29074	4.44976	7.58417	8.0682	4.55678	6.77809	5.19097	2.0225	3.43627	2.62493	5.85192	7.65819	4.98967
ACOT8	11.1638	8.15361	9.71846	8.17953	6.90486	9.53096	11.9732	7.92298	9.29623	8.98856	9.19708	8.31817	7.19071	12.5306	8.06758	8.66253	7.67854	11.6924	9.19632	8.59029	9.53602	6.79827	8.38156	15.0199	8.6565	11.5531	8.72978	8.33222	8.43204	7.53769	9.53086	8.74153	9.12591	10.0697	13.0464	9.4575	10.0851	9.4798	9.09808	11.5196	14.0268	9.24693	12.8289
ACOT9	34.2364	28.6712	54.1034	40.9597	37.4371	50.6097	61.8942	60.0854	44.2849	45.7098	50.6336	21.2807	30.5172	42.1479	28.8248	64.5978	63.0968	46.1199	47.3928	55.6371	48.3411	67.9042	61.5317	73.7309	55.3965	72.4373	51.207	59.6542	64.371	71.2839	76.1287	51.7896	93.5436	64.9206	23.273	62.7634	49.5182	62.8658	80.0159	47.4839	74.7626	74.4638	87.8408
ACOX1	21.5189	23.2532	29.9613	22.1467	17.7813	27.5917	26.4966	27.0922	28.7937	17.7496	27.3654	19.3539	24.24	16.8948	20.6441	23.3418	30.8908	33.6211	26.1587	23.648	34.2497	31.056	31.7528	18.2698	24.4521	32.3173	34.2632	38.6396	30.2238	33.9654	29.4265	28.7938	33.88	26.6758	30.026	29.3467	23.5199	28.8697	30.2746	28.047	22.5324	33.092	35.0627
ACOX2	38.2949	26.9169	35.2198	39.6426	39.6566	38.0978	35.8109	45.1291	28.8654	21.042	19.874	20.2021	36.258	39.0349	30.5774	30.2055	28.8146	38.7058	38.3591	44.218	33.3278	42.3103	41.3005	38.0604	37.0655	38.9379	36.7455	38.2339	24.0975	28.6213	17.7533	42.7089	29.6164	36.9712	6.93695	32.2286	28.0777	19.9261	28.4541	25.4441	31.4507	36.4814	38.9887
ACOX3	5.63976	3.61397	6.14623	6.22504	3.00304	5.21736	7.93299	3.10785	4.1644	5.75166	3.82174	3.99959	5.29962	1.58253	4.73717	5.06625	4.31735	4.11412	5.58809	4.64278	4.19214	7.29122	6.65035	3.58644	3.06819	6.41539	5.62372	4.15299	7.07023	6.06037	5.41211	4.81376	5.30135	4.9192	7.72266	5.72433	5.81817	3.84315	6.95108	4.27421	3.36078	7.82348	5.45903
ACOXL	0.140024	0.187045	0.41264	0.0660781	0.31763	0.249209	0.303794	0.0610251	0.132499	0.0859755	0.0716932	0.917741	0.122114	0.0880195	0.332722	0.189371	9.66493e-05	0.172123	0.0814453	0.038728	0.372658	0.0827972	0.132166	0.0161402	0.200697	0.000107019	0.299845	0.084128	0.184588	0.037739	0.690872	0.254316	0.180036	0.054875	0.44918	0.284833	0.465234	0.157	0.242821	0.223287	0.146679	0.296908	0.131604
ACOXL-AS1	0.046736	0.0351318	9.35396e-05	0.0165869	8.4978e-05	0.132956	0.0507145	9.47635e-05	8.90469e-05	0.0172673	0.000101141	0.159948	8.48689e-05	0.000103314	0.0505726	0.0499004	0.0199961	9.72975e-05	0.0305983	0.0310016	0.118636	0.000106291	0.0189628	0.0321588	0.108111	0.0196738	9.8385e-05	9.76526e-05	0.0142888	0.00010431	0.0253987	0.0443091	0.0360932	0.0731323	0.0732795	0.0534852	0.021235	0.0291039	0.130797	0.018694	0.000105181	0.000110453	0.00010788
ACP1	26.877	28.8531	20.3904	29.6605	23.1587	20.9802	20.0374	20.2457	20.4217	23.7893	24.531	27.2189	24.0142	34.5255	25.1146	20.138	25.699	15.4032	23.7413	25.6577	21.5258	20.4901	20.5054	30.1264	18.474	20.7783	18.8109	20.3044	27.2313	27.722	21.6696	22.1825	18.9674	12.2498	30.8318	20.0179	18.9814	19.2404	17.5153	28.3714	17.5605	20.4164	24.1569
ACP2	14.8337	13.3907	13.3632	11.5177	10.1658	15.9289	15.5198	12.0924	14.8845	13.0046	14.9252	18.3894	9.99262	14.4939	13.3297	12.634	14.6666	15.6489	16.7657	12.0909	11.8373	13.2425	13.291	19.6947	10.6206	18.0779	14.7154	11.5308	13.697	9.90407	20.3807	12.9038	13.3571	12.2361	14.0711	15.8521	14.5417	14.4021	14.3347	17.5469	20.3172	15.5332	17.094
ACP3	0.122397	0.646026	0.0792036	0.277566	0.131273	0.209538	0.125716	0.094153	0.246426	0.0294127	0.0287379	1.53598	0.12341	0.0809257	0.282146	0.124674	0.0690652	0.179016	0.148923	0.0462936	0.104373	0.255287	0.123144	0.0352608	0.0914743	0.195774	0.0882591	0.0333686	2.93368	0.206082	0.948351	0.227966	0.137995	0.219191	3.10907	0.0444339	0.114805	0.987121	0.0832049	0.0976211	0.0720491	0.161414	0.0382934
ACP5	7.49029	6.64605	8.82997	6.72635	4.04873	5.9908	12.6096	15.1982	10.7336	9.04387	6.39892	20.0715	7.48925	22.3604	3.98432	9.00368	1.79165	8.90363	11.9995	7.31472	11.5829	12.3954	7.15518	15.5639	17.7808	16.855	11.8095	5.2629	9.99515	2.76936	12.632	14.0885	6.93198	17.2113	3.53898	11.7476	10.1852	8.73973	7.69025	5.97857	19.3626	6.93226	5.17107
ACP6	9.44564	3.84829	11.0179	8.03285	13.7778	11.907	10.6653	10.9167	10.4673	12.8325	6.74549	12.1996	12.4301	13.7849	11.6946	8.34648	7.21261	9.54598	8.34744	11.0152	12.1172	7.28352	9.96646	7.48348	6.69216	8.07456	7.36443	6.64525	8.88583	5.11337	4.62054	6.9843	6.32099	8.4874	10.1915	10.3923	13.8763	8.97503	9.40967	7.61908	6.13809	10.4296	8.6207
ACP7	0.0156399	8.38274e-05	9.35396e-05	0.0495811	8.4978e-05	0.000255241	0.0380605	9.47635e-05	0.00047035	0.000255074	0.000101141	0.0869467	0.00023129	0.000272097	0.000248795	0.0200139	0.0199961	0.000262426	9.00623e-05	0.000170358	0.0847194	0.289934	0.000638881	0.27184	0.000686038	0.000107019	0.0011139	0.311406	0.000369574	0.15064	0.514214	0.00020315	0.00045289	0.17969	0.000244781	0.106466	9.21523e-05	9.95428e-05	0.130797	9.46079e-05	0.000909168	0.0990405	0.525916
ACR	1.58599	0.42066	2.85256	0.95692	1.12371	1.1128	1.25284	1.19839	1.15205	1.92392	0.81625	0.639564	1.29664	3.675	1.29588	1.51434	1.09457	0.89463	1.87126	1.01225	1.93066	1.80552	0.905724	2.14662	2.11415	1.09584	1.44593	0.655535	0.752254	1.82539	0.919385	0.729596	0.659847	0.785168	1.10608	1.7797	1.41666	1.13127	1.13901	1.02306	1.46584	0.667904	0.811001
ACRBP	1.81921	1.26181	1.2731	1.25387	1.23363	1.5446	1.39204	1.29994	1.39039	1.08225	0.673066	3.21205	1.44918	1.72326	1.71659	1.91283	1.03487	1.11826	1.40347	1.27495	1.89679	0.951051	0.981193	0.929202	1.57406	1.03714	1.51646	1.19333	1.61794	1.11033	1.31577	1.45909	1.06769	0.949483	3.10663	1.86868	1.86066	1.68235	1.25103	1.63684	1.1727	1.5583	0.986329
ACRV1	0.182594	0.000918637	0.0045209	0.000409279	0.158857	0.000187697	0.135417	0.000431832	0.078747	0.117815	0.029681	0.000564877	0.000253636	0.0593504	0.00198077	0.0075732	0.000206734	0.172118	0.083374	0.261152	0.0128139	0.110352	0.0755597	0.000480295	0.000309538	0.000326127	0.0100327	0.0127226	0.00809294	0.000156359	0.000400445	0.088521	0.0705637	0.0172473	0.000133643	9.72288e-05	0.0635205	0.00554674	0.0141287	9.46079e-05	0.000221017	0.0186906	0.0165715
ACSBG1	0.485186	0.660888	0.539654	0.462555	0.297622	0.698171	0.43573	0.666667	1.01682	0.488189	0.818776	0.673955	0.376152	0.448652	0.507804	0.607833	0.55021	0.633329	0.40806	0.627374	0.829053	0.748457	0.371519	0.787356	0.504044	0.471476	0.74081	0.980136	0.976406	0.640525	0.492317	0.533754	0.788866	0.558137	11.3417	0.453234	0.60487	1.04014	1.27898	1.12555	0.405936	0.615584	0.655311
ACSBG2	0.217657	0.175296	0.118101	0.232144	0.381312	0.212121	0.0681369	0.171732	0.29889	0.613786	0.000101644	0.163766	0.253478	0.0812597	0.376608	0.26182	0.905217	0.481748	0.186632	0.347747	0.127312	0.103272	0.704833	0.265925	0.863284	0.0355885	0.00111247	0.51038	0.278591	0.0911116	0.194729	0.108253	0.127714	0.179211	8.88951e-05	0.00273496	0.221691	0.103568	0.602548	0.579587	0.485744	0.389997	0.254199
ACSF2	13.3025	12.9964	11.2727	12.9059	11.7954	9.25184	7.30984	10.3001	8.90666	11.8696	11.9322	14.5881	14.5737	8.09216	14.0663	10.6817	5.76485	9.26508	8.49556	8.74669	9.36396	6.92944	11.3993	6.92595	11.2124	9.73432	11.6789	8.33215	6.57179	7.71159	5.58208	9.99712	5.74001	8.56809	7.93375	8.47787	10.8598	8.17976	7.56716	7.23204	10.4898	12.0063	9.67991
ACSF3	7.70106	6.4602	3.90148	3.26978	3.17148	4.37841	5.54483	10.409	6.61879	7.89911	5.06772	6.36771	8.05458	5.5545	5.79861	4.57088	6.04912	6.42469	5.38576	4.95412	6.87161	5.50821	4.51425	9.95136	3.28623	3.7393	7.59395	3.09426	4.98323	4.01118	4.33057	5.92267	4.16507	5.58666	10.8447	5.85651	5.14064	4.86785	5.14587	6.04662	6.17907	7.76074	7.1176
ACSL1	3.11738	3.92959	14.1462	15.4955	5.3327	14.2125	10.3958	7.36768	11.8218	4.70827	10.4609	4.36042	4.02569	1.23862	7.24545	8.5735	11.861	14.8915	13.2324	6.44511	11.8544	20.2214	15.0067	4.33163	7.6911	17.5214	28.5417	19.2786	19.2628	14.5093	15.3089	11.4332	23.7935	14.4325	6.53068	24.5981	19.1848	20.9494	13.858	7.11738	9.95993	21.5237	21.4845
ACSL3	17.022	25.1991	29.9096	23.1046	30.1253	19.804	28.3922	24.3881	23.1309	13.3769	31.1591	20.5171	19.0004	17.8579	26.4196	25.6476	47.9031	33.1641	24.6157	17.7837	36.4742	33.3618	26.8231	15.061	21.0239	30.1899	37.0551	22.9404	36.4984	41.1764	33.9855	26.8411	51.5364	33.133	21.4465	27.1155	17.2645	27.0508	31.9033	26.6007	14.3279	14.754	25.3738
ACSL4	14.2728	16.2572	35.3202	25.2105	19.6171	32.3129	31.3144	20.059	26.4745	14.7044	18.0499	24.9915	13.9213	14.1828	17.1554	31.3417	39.5945	27.2973	28.3876	22.0628	37.4789	32.4373	29.1097	22.2608	30.632	33.3356	39.7093	43.8312	61.2593	46.6188	42.206	30.3429	61.5194	31.1831	32.5352	34.2147	35.5516	50.5229	50.3125	19.5264	15.5033	27.1706	27.2019
ACSL5	18.1656	56.547	39.7909	21.7236	18.8363	22.5426	27.1711	15.971	43.7908	18.2001	18.7252	110.454	16.5128	12.8458	44.0906	28.3723	18.0831	27.8755	29.7056	16.7875	20.9481	19.1298	21.1007	12.2139	24.4848	16.7606	30.2124	31.419	202.492	26.5467	49.7548	19.311	29.2586	15.2363	139.773	31.3649	18.841	233.411	27.4208	22.6522	18.5145	19.8983	16.6836
ACSL6	0.166326	0.000393758	0.000859468	0.00411531	0.0113317	0.0159094	0.000873733	0.00248229	0.100366	0.298523	0.14681	0.0193108	0.0658423	0.141099	0.00128	0.315191	0.0710162	0.0141443	0.149591	0.106798	0.00454039	0.165876	0.38673	0.114299	0.33006	0.174441	0.00278	0.194756	0.115023	0.0672382	0.000622268	0.0423293	0.192481	0.000200407	0.047855	0.000901986	0.348588	0.284362	0.1415	0.0663807	0.186667	0.121311	0.000110539
ACSM1	2.10315	1.74608	0.39032	1.28954	1.78922	0.863568	2.56137	1.69933	0.856301	2.495	1.43429	0.468291	2.70509	2.46502	1.95552	0.585014	2.26588	1.10766	2.20087	1.78024	1.26689	2.32621	3.30371	3.09616	1.01327	1.92123	1.08808	4.20597	0.482225	1.20643	1.02494	2.24095	0.800609	1.49115	2.62283	1.52328	2.52014	1.30881	0.813581	2.97205	0.979886	1.39592	4.20612
ACSM2A	0.032689	0.016944	0.214493	0.073001	0.107766	0.0825889	0.000103858	0.0433677	0.0739427	0.0195931	0.0580107	0.0788629	0.125786	0.126277	0.0153572	0.0480135	0.0464923	0.0105031	0.142166	0.0497317	0.0691748	0.0664049	0.211168	0.0771805	0.175774	0.0478985	0.00293846	0.161273	0.044462	0.093574	0.0220596	0.0239103	0.100347	0.0771129	0.0659321	0.15952	0.0900303	0.111722	0.0180662	0.0895686	0.040397	0.000110453	0.00010788
ACSM2B	0.108019	0.134982	0.12935	0.0361384	0.0301401	0.0942444	0.154558	0.114559	0.0357869	0.0642195	0.0625267	0.0128092	0.141331	0.0964493	0.0362839	0.0576057	0.0457547	0.063173	0.159782	0.0417348	0.106121	0.0796749	0.137737	0.113156	0.0116441	0.0937614	0.133212	0.119035	0.0706591	0.10678	0.0238561	0.0804817	0.033306	0.0893002	0.118333	0.236283	0.0893185	9.95428e-05	0.01208	0.071683	0.0404022	0.12704	0.00010788
ACSM3	10.5661	13.3993	2.55817	2.64478	19.1805	1.28891	6.76417	7.68155	3.90038	5.01337	7.97543	12.3707	12.6727	4.49483	22.2384	1.75255	4.15905	6.46317	2.84488	4.95143	8.96187	2.0058	3.20633	3.03237	5.5476	5.97794	12.8675	8.20883	16.3707	2.29429	7.78492	3.10286	3.6514	4.67692	41.9173	4.956	39.0213	43.8019	6.77132	37.9779	3.80624	5.50504	4.58511
ACSM5	0.573243	0.394496	0.876555	0.67707	0.740313	0.411999	2.28381	0.344616	0.964916	0.159117	0.641239	0.0456113	0.782813	0.828567	0.38177	0.199642	0.207948	2.52972	0.832763	0.857079	1.591	1.70787	1.10536	1.348	1.12744	1.9333	0.6116	11.5296	0.595666	0.902402	0.509974	1.09896	1.31694	1.16654	1.8787	0.337039	1.03556	0.277902	2.14867	0.31549	0.465428	1.1035	1.02333
ACSS1	38.7194	44.9617	58.7658	36.3977	39.436	59.54	48.6471	30.0166	35.4459	48.8163	35.8374	41.5399	33.7196	24.4799	36.2111	50.6604	39.2969	23.757	39.801	35.5686	26.7509	28.5926	58.1595	21.0832	39.4924	49.3792	41.2272	25.8458	41.2261	23.7093	29.1222	42.3216	46.0779	33.7836	56.2711	105.14	52.863	46.7074	36.5048	22.8215	57.8438	39.8545	39.1195
ACSS2	35.5181	33.3426	45.2866	37.2205	37.8896	31.7149	39.943	36.2752	28.8719	32.7331	32.7383	28.4324	41.3125	30.6254	35.9352	36.13	25.4317	33.6524	26.7992	33.8743	36.2887	31.6011	44.0683	33.5928	33.4283	40.1001	30.661	34.0338	29.3181	32.6346	23.4401	34.8794	24.9251	27.0153	43.9846	32.0463	36.1187	34.164	29.6443	29.863	41.2719	32.079	38.9699
ACSS3	21.0667	29.228	21.316	31.2394	46.3408	29.3924	28.693	33.8258	27.7337	26.9487	32.7217	28.3605	38.846	14.9873	40.0014	19.1355	17.8922	23.3075	21.6065	27.2905	38.1138	21.5639	35.9442	20.0363	36.579	31.5097	25.9658	21.6726	25.5022	32.0599	12.1354	43.9427	17.5332	29.2926	13.9212	30.7815	41.1753	29.1526	41.7806	14.6387	19.1777	43.535	25.4151
ACTA1	0.124476	0.0877038	0.129751	0.132067	0.415336	0.199387	0.531566	0.182886	0.092776	0.0859755	0.300788	0.232618	0.39668	0.175936	0.1852	0.149522	0.119494	0.206528	0.0806696	0.278246	0.0678315	0.0690154	0.264237	0.28764	0.108111	0.0392405	0.123523	9.76526e-05	0.482613	1.26087	0.0675679	0.0885211	0.179073	0.310477	0.138339	0.124669	0.0635206	9.95428e-05	0.0503713	0.167489	0.167619	0.156071	0.065856
ACTA2	5131.35	3074.21	4569.74	4655.1	2444.1	7703.18	8914.39	6143.81	4547.71	5249.63	9252.88	1557.15	2899.32	8685.55	3572.23	4644.65	9203.35	8269.11	6994.71	8898.91	4833.88	11934.5	6949.17	18434.1	6565.83	10899.6	5577.91	7448.16	8979.1	9872.54	4709.19	9417.08	8666.02	11215.5	146.522	5363.91	3713.14	5126.65	7607.39	6688.04	9518.73	10324.4	11245.9
ACTA2-AS1	126.887	46.6527	93.8107	81.9236	39.8807	147.723	92.3771	113.222	62.3784	86.7677	68.0296	38.2598	84.0476	116.846	72.6581	66.6297	189.357	134.829	97.3357	204.689	90.2328	98.8661	81.5109	164.008	107.201	150.316	75.0622	91.6545	69.4841	107.729	63.6973	126.207	76.1316	170.379	1.39098	66.6514	65.7248	56.4075	89.2717	145.389	189.968	117.766	159.01
ACTB	5548.2	2894.79	4181.08	4874.76	2857.93	5493.99	8053.97	4741.94	5301.7	4825.46	6684.02	2500.42	3843.43	8455.16	2907.14	5529.89	6302.72	7489.55	5933.78	6468.23	4751.73	8322.96	5247.86	12857.1	4865.53	8438.5	5611.85	6260.78	6703.98	8564.1	6452.71	6435.02	7599.06	8386.59	2279.23	5331.97	3936.89	6560.17	6539.82	6883.05	8730.84	7621.96	8108.85
ACTC1	2.90758	2.57611	2.26321	11.2346	8.68372	1.1128	13.2488	5.52444	7.62688	1.54603	14.5762	0.843037	10.8912	3.34092	1.16125	2.39102	4.69638	27.7994	3.70175	9.39535	6.72321	50.9377	7.81114	46.342	1.25001	8.179	4.65498	14.6046	15.9373	52.4629	0.683238	5.30002	11.0477	45.6069	0.0570148	1.17463	2.09323	3.21958	8.06581	7.12366	7.39161	20.8501	6.61875
ACTG1	2088.39	1606.93	1196.41	1855.23	1380.32	1526.28	1744.56	1467.67	1649.23	1490.99	1735.38	1241.11	1788.74	2491.62	1604.33	1657.39	1318.57	1546.95	1404.94	1899.91	1972.25	1698.7	1563.58	2785.14	1467.04	1627.1	1512.95	1119.38	1556.73	1427.52	1474.87	1916.24	1189	1835.04	2341.51	1311.01	1386.03	1937.68	1750.89	1941.01	2439.51	1715.28	2082.75
ACTG1P17	0.528725	0.490756	0.542298	0.67647	0.574109	0.531537	0.430334	0.609398	0.43704	0.532579	0.200559	0.537827	0.39668	0.422101	0.488112	0.358728	0.27869	0.619389	0.539069	0.24734	0.525071	0.317088	0.169901	0.336513	0.509318	0.332742	0.405638	0.403444	0.212972	0.150643	0.227811	0.370373	0.34797	0.237448	0.683203	0.587365	0.465234	0.377156	0.242821	0.186089	0.377009	0.247441	0.394596
ACTG1P20	0.777494	1.34943	2.07462	2.45815	2.60151	2.00961	1.31611	0.873429	1.53604	2.25036	0.81625	1.11918	1.739	0.545186	2.20461	1.94272	2.86562	1.3591	1.71872	0.965891	2.08309	3.47318	2.81136	0.288458	1.45061	1.40891	2.94467	2.20169	2.10048	1.6184	1.88085	1.2933	2.02731	1.44243	2.05757	2.13562	1.86066	3.01659	1.88584	1.20906	1.02613	2.57235	2.38895
ACTG1P25	0.186668	0.262944	0.0354547	0.231049	0.305417	0.132956	0.101331	0.121955	0.0795347	0.154684	0.0860116	0.0872795	0.22889	0.052853	0.0842295	0.0499004	0.0398956	0.0517049	0.122123	0.038728	0.118636	0.124143	0.0755646	0.064196	0.0463867	0.156641	0.105891	0.134546	0.28393	0.037739	0.0928693	0.116154	0.0840743	0.0913897	0.0407502	0.0178932	0.021235	0.0291039	0.0374441	9.46079e-05	0.12574	0.0248436	0.306932
ACTG1P4	2.23901	2.96164	2.92328	1.68279	3.10226	1.81032	1.30346	1.29994	1.97299	1.35708	1.11694	2.03481	2.18136	1.3716	2.91141	1.99253	2.06964	1.44511	1.5255	1.41402	2.32016	1.43341	1.45287	0.929202	1.7438	0.802343	1.86911	2.28572	1.09285	0.809251	0.910951	1.81279	1.59548	1.4972	3.47259	2.59831	3.40408	1.79837	1.51242	1.87863	0.732974	1.23677	1.22741
ACTG2	1142.46	497.559	533.788	915.89	318.858	2796.78	4972.73	1320.64	939.168	1047.89	3302.17	217.758	325.019	1530.68	632.035	877.59	4607.8	4832.63	1928.42	2946.65	1020.75	5164.41	1692	14837.6	1881	8327.36	1701.68	4592.17	6258.22	5135.02	3987.87	3664.76	8535.18	6311.58	16.7035	1882.93	668.963	3362.24	6390.09	2531.15	4014.46	4090.12	5659.73
ACTL10	0.932975	0.578376	0.41264	1.33635	0.855014	0.265817	0.784646	0.426607	0.701859	0.755881	0.773295	1.07558	0.793274	1.19576	0.757368	0.54801	0.716478	0.739807	0.884829	0.718648	0.508136	0.620288	0.981193	0.83309	0.509318	0.684943	0.440902	0.521086	1.06447	0.432904	0.582032	0.630119	0.335975	0.675624	1.83799	0.765325	0.444091	0.261139	0.186809	0.409281	1.46584	0.71737	0.635673
ACTL6A	17.1559	21.748	18.8222	25.0513	21.2188	18.6259	13.8591	22.772	19.76	10.9874	24.276	19.6637	17.3938	14.7293	16.1367	19.1346	22.0277	15.9784	20.8195	23.2962	18.2652	19.7928	19.1343	18.3217	17.4138	18.076	19.9093	17.4567	21.0271	18.8816	24.2839	16.5525	15.8355	18.5263	24.4316	19.6577	20.5232	22.1214	17.2698	27.7448	19.4083	23.1512	30.5823
ACTL9	9.18271e-05	8.38274e-05	9.35396e-05	8.98604e-05	8.4978e-05	9.58231e-05	9.85261e-05	9.47635e-05	8.90469e-05	9.019e-05	0.000101141	0.0146104	8.48689e-05	0.000103314	8.72566e-05	8.94826e-05	9.66493e-05	9.72975e-05	9.00623e-05	9.61919e-05	9.22969e-05	0.000106291	9.55554e-05	0.000121546	9.35412e-05	0.000107019	9.8385e-05	9.76526e-05	9.712e-05	0.00010431	0.261546	9.70507e-05	0.000107459	0.000103092	8.86552e-05	9.72288e-05	9.21523e-05	0.0581083	0.000102874	9.46079e-05	0.000105181	0.000110453	0.00010788
ACTN1	298.369	319.023	428.005	385.172	217.569	518.225	580.041	443.976	436.458	368.109	551.549	161.208	208.178	407.679	286.032	437.65	650.548	564.366	423.381	493.733	421.923	675.105	372.546	759.187	387.157	759.515	473.982	590.016	658.701	629.403	586.63	519.72	741.147	734.816	6.9343	487.169	314.431	479.904	534.825	598.257	591.319	761.46	742.238
ACTN1-AS1	0.186668	0.192848	0.106177	0.148563	0.195497	0.498322	0.392372	0.0813351	0.384077	0.223392	0.128967	0.290753	0.442441	0.58035	0.605912	0.179409	0.218991	0.172123	0.193309	0.432772	0.474267	0.248179	0.0566974	0.384568	0.648197	0.215341	0.229316	0.084128	0.212972	0.131826	0.16034	0.243263	0.072079	0.219191	0.0488825	0.284833	0.190377	0.290143	0.093456	0.613874	0.439827	0.247441	0.175436
ACTN2	0.497276	2.54875	1.02651	0.575253	0.536983	2.6761	0.423349	0.533856	0.696049	1.08625	1.99519	1.55036	0.714371	0.546219	4.32818	1.46522	4.71081	0.954875	0.0598088	1.13743	0.765823	0.737508	0.541015	0.413446	0.346643	2.80396	0.362521	0.873045	1.29705	1.18422	0.443389	0.458437	2.53662	1.31628	0.0855773	0.631059	0.444608	0.77621	0.96786	0.799954	0.65045	1.69773	0.429464
ACTN3	0.0768715	0.105226	0.116508	0.0931941	0.275796	0.0938235	0.0715137	0.10039	0.210297	0.10915	0.161718	0.164125	0.301388	0.124146	0.0238309	0.0984805	0.0281732	0.194269	0.154484	0.00335514	0.186103	0.0389964	0.133197	0.158329	0.0654095	0.0967318	0.00124714	0.20165	0.030132	0.00010431	0.134058	0.0312869	0.025494	0.18042	0.0115627	0.0534852	0.1045	0.0614838	0.0527884	0.0525791	0.103507	0.244386	0.185638
ACTN4	702.687	543.755	1004.89	559.199	349.227	1071	1056.21	809.828	899.501	834.791	766.103	377.841	427.452	1029.62	573.579	1031.36	1199.02	784.047	739.536	1007.33	607.01	1213.7	1044.74	1344.38	825.418	1124.65	1092.6	709.505	1202.6	1026.86	1035.66	844.906	1110.13	1169.86	475.141	1313.97	882.778	870.587	1047.96	899.293	1151.65	1132.46	1072.07
ACTR10	55.32	51.6784	47.0658	56.3211	62.4587	52.4301	48.4396	59.0212	48.3825	56.7531	60.3808	38.0205	54.1658	61.7524	48.2809	50.9567	55.5794	52.5367	53.4098	55.5526	50.4319	55.6097	49.3191	72.5324	54.9963	56.4501	47.6774	55.9307	48.28	67.9308	49.6669	58.3103	63.467	61.4725	42.5321	47.2662	42.3703	46.9582	57.599	54.7939	56.452	50.8514	61.4965
ACTR1A	117.761	83.9576	134.832	124.916	78.4826	119.923	144.863	132.767	114.892	121.287	150.558	71.2738	91.6745	183.552	91.0589	134.49	121.904	140.958	137.735	133.998	146.893	148.775	136.675	227.497	120.455	166.846	133.193	112.651	133.657	121.466	137.64	135.046	158.541	147.264	49.2982	133.061	122.628	128.983	139.302	203.143	175.428	151.614	180.829
ACTR1B	86.9603	72.9175	70.0741	75.1443	61.6038	70.6984	88.8691	87.9631	71.6336	96.2775	83.82	54.9524	67.589	103.337	71.8576	82.238	60.6737	65.1461	80.9181	80.0761	56.0712	68.9643	79.9784	102.76	70.5354	77.9148	71.6395	56.6366	66.5872	58.7855	66.0707	75.0335	76.6138	75.0742	79.3552	81.8082	74.7188	62.8526	76.9417	75.2718	105.387	77.4642	81.6373
ACTR2	80.0631	87.1632	151.652	128.57	97.0892	136.686	132.371	124.231	135.906	88.4733	129.776	115.317	83.6056	88.5488	83.253	142.424	195.075	159.867	152.04	126.3	135.491	187.406	147.068	146.056	150.749	161.14	166.238	214.425	197.338	245.904	230.409	142.991	247.58	172.891	121.493	168.002	134.022	158.2	167.742	115.413	126.97	185.285	175.398
ACTR3	47.3665	44.3162	66.0556	55.6072	56.0169	70.3232	77.9978	70.2435	58.3456	54.6511	105.474	58.6922	48.416	86.9784	45.2591	63.5178	147.893	91.0527	88.5604	92.0134	65.7998	101.814	74.0411	158.184	85.0763	103.208	70.8786	124.247	104.46	184.514	102.375	90.1556	135.276	108.159	34.6852	69.854	57.941	92.1883	93.1517	70.3039	66.8758	89.8384	92.1209
ACTR3-AS1	0.217764	0.140276	0.09439	0.148563	0.0489381	0.64779	0.379718	0.162576	0.198703	0.0516214	0.171922	0.20355	0.0763531	0.123186	0.134715	0.189371	0.139393	0.120515	0.142462	0.370961	0.338788	0.261961	0.264237	0.0481774	0.432163	0.156641	0.158788	0.689147	0.19878	0.188278	0.194075	0.370373	0.204027	0.365249	0.162735	0.195853	0.190377	0.232134	0.168139	0.0744922	0.0629225	0.71737	0.197352
ACTR3B	3.12467	3.64491	1.51738	3.04319	2.76608	3.05453	2.02832	4.0052	3.50997	2.44289	3.22731	2.98894	3.56207	1.89039	2.23846	2.00173	3.06368	2.36578	3.12505	3.60414	2.85549	3.77851	2.48696	4.00695	2.41516	3.05324	2.55748	1.86667	2.17624	2.16165	2.46561	3.24088	3.07691	3.1062	0.972787	2.93657	2.20115	3.21801	3.3573	1.49248	1.9737	2.35219	1.51326
ACTR3C	0.743425	1.28989	1.23812	0.767137	1.2116	1.44854	0.978126	0.875085	0.607998	0.849519	0.844841	1.38421	0.677954	0.620802	0.866032	0.641346	1.25274	0.921674	0.767092	0.623415	1.13709	1.14655	0.78214	0.465519	0.77761	0.561082	0.951572	1.31478	0.937163	0.835604	0.79191	0.929903	1.33405	0.637186	2.69153	0.890276	1.48763	2.12001	1.0781	0.813693	0.54617	0.773299	0.656041
ACTR5	17.1029	16.5427	12.3411	15.5073	16.4025	10.9943	12.3377	16.431	11.043	16.7134	12.9869	11.6417	16.1842	19.2186	13.4965	14.2161	11.5816	9.53031	12.3966	12.7022	9.80534	9.60603	12.6034	10.8127	9.99941	11.0162	11.6197	9.91568	8.68538	9.55932	8.08814	10.401	7.13729	10.5346	9.00256	9.36079	12.8338	8.81743	8.38321	16.2002	16.0604	9.59655	10.8705
ACTR6	15.5368	12.9308	6.66624	10.9898	15.4083	8.59864	9.52375	11.909	7.57171	11.3791	8.87481	7.94949	8.18105	9.499	8.48182	7.36613	9.05758	8.16183	8.75672	10.183	7.44997	8.19629	7.65986	10.766	12.1891	9.66049	5.93455	6.71062	7.70079	10.4372	6.35066	12.9777	12.0703	10.334	4.94401	7.46102	6.35354	5.03558	11.828	7.34688	9.23449	9.10744	10.301
ACTR8	14.9107	17.4365	21.3582	16.3817	16.2193	20.1451	15.8935	16.1669	17.7297	14.2571	17.1679	16.6413	14.5673	11.9919	15.4654	17.9819	23.183	19.9895	18.9254	17.7784	21.9476	21.4997	17.9806	18.9021	19.0729	18.9994	20.2065	23.1925	20.5212	19.1938	20.4859	20.6195	22.6472	18.6408	19.9649	24.1492	21.1218	18.2728	20.4071	25.0349	18.6359	21.2706	19.9656
ACTRT3	1.29058	1.94525	0.848761	1.12189	1.09928	1.19584	1.27815	1.40149	1.49632	2.23311	1.93309	2.93591	1.72375	1.60018	1.12759	1.86302	1.29356	1.06666	1.17974	0.834543	0.880702	4.96156	1.43401	1.50587	1.12656	1.36978	1.07566	1.47903	2.89519	1.6184	1.55192	0.81802	1.00771	1.1138	4.85508	0.747529	1.24752	0.957244	1.23236	1.32065	1.48678	1.3357	1.4904
ACVR1	11.3877	12.3738	18.4168	13.3	11.0773	13.0803	16.2347	21.5328	14.5106	11.571	15.2136	14.7909	10.9222	12.8561	8.27674	15.7797	16.9606	21.1221	13.341	13.1785	23.2467	16.0196	17.1935	21.3138	16.1053	19.1424	19.9349	19.0202	15.163	22.1193	16.7456	17.4896	14.1002	18.9431	6.64076	22.7246	16.7015	18.6006	18.7725	19.6975	20.6734	22.3106	22.9982
ACVR1B	15.073	19.3371	16.7907	19.9979	18.3442	17.6464	17.3989	17.3525	15.5859	17.0226	14.764	16.1517	13.7556	11.4609	19.7066	21.1375	15.077	14.5731	15.3438	18.5077	13.4908	22.4324	22.1181	12.3018	16.5602	19.3209	24.1693	14.8159	23.3334	16.3475	18.9214	15.1476	17.262	17.6223	51.1458	21.6339	20.9361	25.3009	19.1975	15.7187	15.5073	27.9909	23.724
ACVR1C	0.009911	0.557137	0.0433302	0.832305	0.11548	0.172244	0.243321	0.0673447	0.727581	0.284973	0.0275393	0.366319	0.280363	0.145913	0.0484345	0.189285	0.00706868	0.332953	0.111784	0.288416	0.201394	0.0686675	0.391239	0.310069	0.21164	0.540966	0.426559	0.828661	0.106385	0.0375106	0.0910904	0.332049	0.286691	0.466917	0.0101946	0.258351	0.540684	0.0027909	0.116029	0.872399	0.332911	0.0933198	0.515036
ACVR2A	14.4774	16.987	13.4187	11.7285	15.3754	20.961	11.862	11.3463	12.0532	10.1848	15.0766	12.2097	15.8151	10.3074	13.2943	12.2915	18.0561	15.1678	16.4406	11.6197	18.8743	18.487	13.4038	7.86693	12.2992	15.1175	11.2611	20.0363	13.2865	13.4083	13.3238	15.9074	13.4593	16.2996	12.7605	10.9629	15.3256	11.4237	12.6983	8.67985	14.5901	10.9015	17.4273
ACVR2B	19.7617	46.4562	20.1677	24.2673	40.9023	21.0086	14.6534	15.842	18.2196	18.2078	8.34773	26.9748	32.231	11.5523	32.1593	15.6607	19.9792	22.071	16.7898	13.8766	24.5217	12.5278	19.5843	6.07118	15.8323	16.671	12.466	21.6295	10.8425	13.6615	17.2473	18.9394	11.2996	15.884	32.9034	16.7639	20.2972	12.9941	10.9598	21.1104	13.8199	13.5786	13.2593
ACVR2B-AS1	6.29705	8.97237	5.77575	4.28933	8.47609	5.97881	3.84691	4.38708	3.41625	6.54455	2.14786	6.8455	3.92027	3.74533	7.06804	3.29758	2.20894	3.87067	2.28821	3.66239	8.78925	2.9632	3.54714	1.52189	3.59553	1.64371	3.52653	2.45378	1.53279	1.75012	1.39168	3.47074	1.94334	2.13621	4.4322	4.25334	5.64522	3.36461	3.26746	3.12479	2.38716	2.84442	1.73147
ACVRL1	30.5927	16.385	30.5863	42.736	19.2294	31.859	26.5457	26.8024	19.7565	28.9642	23.5344	14.5478	18.0401	31.666	16.6435	27.7243	22.98	24.7172	28.9342	27.3369	21.1564	22.8987	29.8892	29.3392	33.628	38.0243	35.4175	25.2862	33.8254	20.074	31.9473	28.141	24.7101	38.6452	9.80918	21.6604	37.1428	11.3277	22.5911	23.9135	62.0774	30.4147	32.9184
ACY1	8.58973	4.76977	5.67489	7.91299	3.6932	6.88882	7.57705	7.43454	7.30418	6.80773	8.30577	10.3491	5.00444	11.1348	7.26088	5.92375	6.28008	6.35938	9.22294	7.05065	6.53635	7.34984	6.08464	8.70098	6.21985	5.5114	8.08783	4.17209	7.21287	4.32039	6.08004	6.00029	4.41966	5.72726	18.2241	7.34456	7.18088	6.68661	6.00563	3.99171	10.3883	5.84217	4.97975
ACY3	0.202216	0.438184	0.09439	0.0660781	0.0489381	0.066526	0.151947	0.121955	0.132499	0.0344443	0.0287379	2.36909	0.10686	0.316602	0.151543	0.109674	0.0597951	0.137718	0.0916147	0.115992	0.0678315	0.124143	0.169901	0.112252	0.0618177	0.0979407	0.123523	0.0337098	0.652912	0.0565564	1.31577	0.0885211	0.0121027	0.000103092	0.666938	0.0356892	0.126949	0.783217	0.0561147	0.260486	0.0629225	0.197975	0.065856
ACYP1	7.31226	5.51636	4.13474	4.7519	5.33867	4.07924	4.53021	5.47084	5.12056	7.23236	4.95545	3.97744	4.76544	8.99907	5.171	5.1557	4.15252	3.08628	4.41103	5.08945	3.48856	3.76033	3.8695	6.97901	5.25842	4.33467	3.62129	4.24788	4.05596	3.55784	3.02163	5.47315	3.36267	3.87456	11.5284	3.56271	3.58154	4.37604	3.38849	3.39579	6.19058	4.00006	4.96825
ACYP2	5.56815	3.33418	2.84356	3.54062	3.32145	4.50376	5.28816	1.96015	3.93674	2.84986	4.79101	2.14294	1.94972	2.2805	3.80332	3.18438	3.321	3.88065	4.31092	3.33477	4.82139	5.38427	3.17593	4.30327	3.24158	3.13611	4.87987	4.29241	3.33374	4.70615	4.00756	4.24498	3.9008	5.07221	3.81755	5.89231	6.11623	3.5551	4.38477	3.12479	5.16882	4.62083	3.03658
ADA	3.73783	1.86039	3.19801	2.81106	2.55254	2.57132	3.47013	4.39836	3.7159	3.83768	3.20378	4.68932	3.50882	4.18511	2.07178	4.43156	3.1689	2.81711	5.75467	3.32557	3.33108	2.59122	3.70343	6.43198	5.14317	3.65343	4.72089	1.94042	2.60077	4.73394	5.19807	3.59038	2.5938	3.16467	1.22905	3.79928	2.8386	1.84539	2.10305	3.77182	7.72173	4.74764	3.48408
ADA2	11.054	12.3646	7.03041	8.2954	11.9295	8.81884	11.0604	22.4478	30.9168	8.6084	16.7932	79.8619	8.03843	35.215	28.4922	11.2496	17.3806	9.25152	13.4359	24.9862	15.0982	30.7489	5.51937	12.4748	12.6372	12.058	16.2368	26.7949	34.5938	22.9049	10.4887	6.29526	17.4717	28.3718	18.8667	26.1863	29.701	33.455	16.1576	19.7306	29.7642	16.2984	37.7681
ADAD2	0.242111	0.252316	0.69694	0.324598	0.0929612	0.413809	1.05442	0.343503	0.219423	0.0172062	0.203713	0.329104	0.608622	0.288544	0.264383	0.451247	0.000139052	0.524678	0.887467	0.192667	0.500697	0.189191	0.312733	0.464432	0.310194	1.08345	1.03071	0.0169037	0.0425207	0.22511	0.575478	0.349707	0.933944	0.332879	0.176271	1.53224	0.248024	0.00163026	0.16814	0.833338	0.229617	0.209151	0.00627565
ADAL	5.42475	5.17172	7.67053	6.05356	3.66153	9.01678	7.2705	4.77537	5.91607	4.81176	8.2289	4.54338	4.98449	5.83686	4.3525	5.94933	8.21078	7.21393	8.65872	6.22386	4.01779	4.93282	4.59721	6.2526	5.66379	10.43	6.30979	5.19806	8.65619	8.34649	6.66501	4.78164	10.9196	6.16904	4.82136	6.3184	7.24898	8.59063	9.86695	2.59591	4.3726	6.30243	8.92344
ADAM10	42.595	60.4838	84.0336	57.9317	64.5446	63.389	61.5817	51.6694	56.3005	41.8333	49.6758	67.9758	51.6649	23.7162	53.2689	59.963	75.4638	74.7463	55.3557	47.0079	72.2757	64.3045	64.1919	32.165	59.0551	66.9053	58.8863	88.2173	65.6326	73.3299	108.324	61.3863	88.7198	57.0007	96.0977	59.6825	68.0905	96.4219	82.2338	53.393	38.7926	70.15	67.8271
ADAM11	11.7237	13.6381	12.9331	7.33744	8.52382	16.423	7.73234	9.75695	7.25657	9.96083	16.4744	6.20159	7.98363	6.53894	11.136	6.17604	12.4302	8.3599	11.3519	16.0405	7.34981	17.5294	8.84773	6.91478	6.96547	7.17498	13.6169	6.11801	4.74482	4.77573	4.29573	11.8177	3.86632	9.73206	5.67573	9.95287	10.7703	5.88077	8.04368	9.88365	8.51885	7.91661	7.02621
ADAM12	0.725111	1.2247	1.0081	0.525684	0.400738	1.12654	1.21265	0.703966	8.416	0.909242	0.743735	7.11018	0.603643	0.632589	1.62784	0.813695	2.69209	1.24245	1.52746	1.05993	1.66977	1.82465	1.1356	0.675106	1.04504	1.84168	2.21979	1.50031	3.82503	2.10122	21.269	0.654864	0.945075	0.951176	0.683674	3.03821	1.32203	8.75305	1.59409	2.74565	0.955757	3.04137	1.34615
ADAM15	72.8099	58.774	117.816	98.7614	79.6563	74.0526	109.015	74.3948	75.4725	103.84	93.4503	44.4601	83.335	136.092	73.525	117.729	79.6447	82.2168	125.971	89.08	79.3467	79.3757	101.249	109.594	67.9241	93.6993	91.9709	67.4072	70.7603	48.5203	66.3474	76.2434	75.7515	85.2178	30.5378	77.4638	56.6254	62.2753	90.3592	68.0452	114.166	83.9947	82.1266
ADAM17	6.91871	12.2732	23.1681	18.0292	12.7639	16.9657	16.8264	16.4361	18.0549	10.4628	18.2178	13.6956	14.3643	6.49238	13.9401	17.3141	19.0198	20.5395	18.1569	15.0665	24.0893	20.6621	23.3429	6.73085	19.564	15.9202	18.3853	23.9834	23.3089	22.7079	28.9199	13.6443	25.7788	17.744	20.4821	29.2585	22.0505	20.6475	25.852	17.9285	13.0278	24.0955	16.0247
ADAM19	20.368	20.2228	23.7746	36.0957	21.9107	63.1752	39.0883	28.9217	45.8403	38.9405	38.4307	43.0928	24.5737	23.6671	31.0822	29.2591	94.4232	45.4492	35.4608	46.3196	42.8959	49.7387	41.942	51.0354	43.7008	38.6835	51.151	39.0238	84.5397	76.7749	71.2997	37.8677	37.6412	57.2185	14.5244	49.0458	28.2469	79.7911	91.7662	46.6474	49.5839	53.1268	45.6293
ADAM20	0.80859	0.385612	0.69553	0.297037	0.39091	0.465107	0.278487	0.629708	0.476763	0.377986	0.401016	0.232618	0.366172	0.439684	0.370313	0.408539	0.358288	0.326946	0.488222	0.355509	0.389593	0.551379	0.415175	0.256419	0.355008	0.371875	0.440902	0.319413	0.212972	0.357634	0.219377	0.420111	0.443932	0.255705	0.244058	0.338221	0.845804	0.464169	0.280162	0.520878	0.230435	0.346374	0.438428
ADAM20P1	1.83944	2.51943	2.25648	1.6333	2.2644	2.13956	0.843923	2.49824	1.73686	1.44296	1.64454	1.33012	3.4169	2.43428	1.6661	1.6837	2.04074	1.87946	2.09577	1.60414	2.22996	1.10043	1.71355	1.2452	1.62397	1.36759	1.93724	1.39294	1.29016	2.01356	1.19979	1.98507	1.63299	1.67211	1.69974	1.6473	1.8875	1.59534	1.49737	1.96597	1.10259	1.4099	1.74717
ADAM21	0.17112	0.256014	0.359858	0.330031	0.39091	0.255123	0.120195	0.182886	0.285851	0.154684	0.294481	0.124316	0.348612	0.140769	0.471284	0.167171	0.551673	0.320936	0.300171	0.266524	0.535926	0.261961	0.294011	0.192345	0.292235	0.176208	0.345483	0.433051	0.269738	0.395269	0.252749	0.228335	0.212235	0.214814	0.440652	0.293927	0.274949	0.20313	0.142393	0.409281	0.307026	0.371107	0.16749
ADAM22	4.80134	6.16348	6.02232	9.10663	11.928	10.1535	8.00492	12.3722	5.8224	8.85167	11.3164	3.02723	7.68347	4.18844	7.13647	6.43592	5.32565	10.4538	6.3545	5.88554	6.63887	7.50639	14.1467	5.62558	12.9349	5.48397	3.88691	7.93525	6.26905	19.5471	6.37945	10.8131	10.2224	12.2529	1.91033	3.64868	9.88223	3.66476	8.64794	3.8679	2.40345	13.2865	3.24829
ADAM23	2.70545	1.034	2.80541	9.38692	6.13115	5.56363	6.99776	10.5004	6.80594	10.4437	11.0396	3.77887	4.6677	9.79397	3.83697	11.347	10.9647	11.6806	7.73901	5.82577	4.3354	12.5829	8.94318	13.7121	7.14467	9.56824	5.30737	9.29386	11.9778	13.6803	9.97732	12.2413	16.4456	19.5354	0.927172	3.68387	2.70637	6.90314	9.82085	3.40378	7.05659	19.8361	13.851
ADAM28	2.13299	23.0007	1.91132	2.16965	3.61049	5.31183	2.76164	3.64819	15.2704	4.27613	2.94936	50.5467	2.67506	4.70678	11.583	3.22796	2.17704	3.87918	2.70439	1.97189	4.53579	4.28534	6.70393	2.52655	4.8919	2.73797	3.90109	3.85646	12.9034	2.82136	7.5123	3.73499	1.53255	3.62965	79.8889	2.96604	4.41422	27.2808	5.32669	3.42643	2.64971	3.81593	1.89073
ADAM29	0.838272	3.32282	0.273985	3.25078	3.24672	0.139021	0.364704	1.86897	0.652361	2.04367	0.505823	0.781327	1.8999	0.768226	1.01678	0.268616	0.148064	0.255924	0.226941	0.0862729	1.16488	0.614973	0.596336	0.208564	0.315632	0.25472	0.426199	0.328132	0.211147	0.437357	0.047131	0.565134	0.0670026	0.50919	0.0454409	0.198587	1.21849	0.970608	0.590129	0.622445	0.778593	0.620803	0.16307
ADAM32	0.511208	0.240331	0.710651	0.115971	0.217243	0.21938	0.450682	0.995228	0.706101	0.00199898	0.753991	0.97671	0.424133	0.633407	0.749632	0.438144	0.627655	0.359586	0.564377	0.579413	0.554169	0.385385	0.419452	0.740816	0.583924	0.372635	0.294712	0.170625	0.383189	0.637474	0.515685	0.256457	0.844423	0.566076	0.561028	0.142646	0.233632	0.900532	0.688605	0.61799	0.000108164	0.217745	0.110731
ADAM33	190.018	147.954	115.99	198.554	201.229	188.723	282.69	228.072	200.124	240.626	185.984	117.456	228.852	286.363	182.143	191.764	188.71	279.324	191.102	220.171	175.846	196.247	242.757	311.2	156.743	241.923	260.502	243.827	162.89	185.626	203.189	159.914	169.735	232.959	32.9806	163.221	188.606	217.637	234.44	280.127	282.601	312.361	244.065
ADAM8	6.79233	5.35974	4.72622	5.75088	5.68958	5.54998	5.09277	5.22603	9.04957	6.90416	4.29624	14.5985	6.6922	3.64417	6.5458	11.4406	3.31149	4.19967	3.91014	4.7761	5.94161	4.61874	5.99574	5.58098	6.5774	4.81328	10.9929	2.7654	9.43095	5.9697	13.6309	5.35366	2.14635	4.52221	14.1548	3.14035	5.58044	5.43329	5.40004	6.34895	7.96941	5.98112	4.58366
ADAM9	46.0894	63.6908	97.1961	63.8871	51.1177	90.0784	97.4117	71.8152	76.6	52.1318	60.7903	57.5916	49.6136	26.7942	47.4662	84.1016	107.828	122.248	72.2146	59.3936	136.089	93.0643	83.3157	63.6838	81.7658	111.076	102.197	144.543	112.865	116.572	136.561	77.3306	182.666	103.15	55.8762	147.455	120.662	143.605	136.854	73.9556	71.3263	110.697	66.6384
ADAMDEC1	0.00160217	0.0252138	0.00238353	8.98604e-05	0.009478	9.58231e-05	0.000713131	0.00155104	0.0398119	9.019e-05	0.00215445	4.41008	0.0121157	0.000103314	0.00253933	0.0981622	9.66493e-05	0.0111238	0.000583991	0.000846731	0.00494932	0.000775674	0.00284471	0.0016776	9.35412e-05	0.00295809	0.000954779	0.00440662	0.00518493	0.00010431	0.203291	0.00197601	0.00526776	0.000103092	0.00634308	0.00096158	0.00280259	0.00150829	0.0484587	9.46079e-05	0.00417323	0.000110453	0.0022368
ADAMTS1	372.625	202.052	472.956	239.34	214.074	185.091	395.944	231.088	405.173	380.043	1118.32	422.265	588.76	436.821	240.462	569.977	174.041	527.327	228.374	267.579	399.543	579.291	210.596	510.433	268.778	186.06	465.048	256.377	290.205	1069.99	297.234	167.083	300.589	137.441	572.059	293.438	252.149	699.063	584.932	358.857	179.804	1025.09	209.32
ADAMTS10	26.6982	17.0347	50.3042	28.6324	21.5517	50.3093	44.7837	26.8335	51.2256	28.3875	20.454	24.0986	25.3807	17.0899	37.6697	48.3321	45.155	49.93	38.8432	46.0381	54.4967	50.7171	50.075	36.7351	36.8461	32.9679	67.8318	44.0992	32.3784	36.647	42.7443	39.2657	29.2271	41.3424	12.9044	36.7407	55.346	44.2032	40.5697	59.052	47.1897	49.1039	43.1621
ADAMTS12	2.50561	8.2508	3.42085	10.3262	6.66036	6.98029	2.6077	3.31403	3.7236	3.08407	3.45806	4.31202	5.66655	0.845911	6.66259	2.72779	10.2944	6.04561	4.73081	3.73121	2.03182	7.77308	3.76487	3.20677	3.92026	4.83363	2.72304	6.17177	6.8699	5.64112	12.2312	6.82626	7.4035	5.74664	5.56137	3.108	2.96899	5.59826	9.0128	1.05167	2.14891	7.34266	4.13817
ADAMTS13	8.1765	9.56712	6.29579	6.6603	7.56237	7.46777	9.13309	8.44334	8.77934	9.53692	8.13948	9.58371	12.6669	5.97378	10.0594	8.04498	5.06221	6.50685	7.08599	6.01055	7.2367	5.44676	7.4566	9.49422	5.91405	8.31864	9.1389	4.38974	4.94046	1.65275	8.19075	6.84843	6.29407	6.96687	11.4913	7.0561	8.20008	8.79873	10.1717	5.76475	9.73061	9.94342	9.31421
ADAMTS14	0.299132	0.629622	0.465751	0.488888	0.0953156	0.89791	0.552627	0.179574	1.25276	0.17867	0.58809	0.891551	0.237959	0.383986	0.384987	0.419547	1.91374	0.795945	0.791759	0.94985	0.325805	0.671567	0.22567	1.50912	0.689922	0.437467	0.815821	0.314598	1.04275	1.10542	1.66877	0.931792	0.346999	0.730864	0.847514	1.31368	0.461689	0.193148	0.465958	0.697067	1.74161	0.041056	0.307703
ADAMTS15	2.00579	1.43705	15.1347	5.98853	4.4335	18.1688	26.5861	8.91623	16.975	7.11139	34.2211	4.83983	3.09658	5.09924	2.99555	9.89255	17.6509	12.0419	21.9864	44.6739	6.94336	15.9457	15.2637	24.6207	11.6968	19.6451	27.7002	14.8399	27.5177	41.6617	30.5221	11.0034	12.7271	25.9072	11.548	7.72356	11.0366	6.12002	25.3361	11.1225	27.7444	45.0886	25.0282
ADAMTS16	0.0133435	0.0523594	0.22716	1.7299	0.0469275	0.145181	3.92119	1.43517	2.72658	0.615902	0.699143	0.0325791	0.292674	0.0675417	0.290531	0.0213166	0.853001	1.91992	2.3477	0.939589	0.220206	1.48237	1.41601	6.96959	3.01721	0.959612	2.11748	0.107528	1.31735	22.8213	6.58733	3.25605	1.94374	5.86315	0.00845863	0.74388	0.0631629	0.0433607	0.786326	0.0199101	12.5235	4.87838	0.481072
ADAMTS17	4.52457	10.7949	3.98412	3.54696	5.8136	4.38449	1.98678	4.24491	7.24289	3.89928	3.40788	8.32795	4.37788	2.69034	8.7004	2.98875	4.27849	4.0427	3.15261	5.60943	7.53608	2.8805	2.1887	2.17865	3.04001	1.83938	3.77338	1.61348	3.06549	2.33346	5.66763	1.76305	1.41555	1.84409	4.18823	4.80501	4.73608	6.93214	5.22788	11.1969	1.69617	2.79495	2.41087
ADAMTS18	0.110756	0.677198	0.0839885	0.251702	0.0311309	0.69246	0.315337	1.38376	1.38087	0.506605	1.51426	0.524706	0.0543692	1.03709	0.742105	0.228008	4.46188	0.306198	0.922616	3.60385	1.28226	12.0923	0.374189	1.13611	2.92622	0.189113	5.50288	0.102627	0.324778	1.23424	0.170021	2.88857	0.502811	3.27773	0.376334	0.199141	0.720291	0.501455	0.351311	0.992989	0.140584	1.45876	0.50151
ADAMTS19	26.5873	17.822	10.5967	15.7383	25.1594	78.7033	24.3084	35.2787	27.3691	35.11	53.6225	17.5278	16.535	20.6077	42.7948	9.82281	62.9024	22.7591	42.854	40.5558	62.6589	64.623	50.0738	36.2503	74.1	18.5102	96.2011	17.3104	26.9642	40.7397	20.41	72.1818	18.9646	40.1845	0.406704	19.7714	46.4297	29.6716	42.2144	22.5054	40.9361	54.8087	26.6281
ADAMTS19-AS1	0.65311	0.42066	0.271196	0.775452	0.549682	1.90996	0.911186	0.731258	0.56945	1.03071	0.945116	0.348888	0.549216	0.457268	0.807853	0.338804	1.85075	0.481769	1.32211	1.29812	1.18553	1.91578	1.71702	1.08939	1.49691	0.724076	1.55173	0.453862	0.652912	0.903338	0.624201	1.87358	0.635856	1.1138	0.00822097	0.356017	1.20523	0.464169	0.82161	0.372082	1.48678	1.97876	0.526092
ADAMTS2	17.6738	7.78419	30.426	25.853	10.5409	65.257	45.5159	53.6357	68.8016	28.2612	49.5635	19.7059	18.9212	40.7176	17.6578	37.9628	103.57	74.4357	51.5588	77.6721	45.632	135.007	93.6112	123.215	50.803	40.5759	76.9989	70.2187	77.0816	76.9374	280.415	66.1971	60.587	106.592	3.56632	48.5528	46.0767	64.91	81.7715	59.6972	121.954	209.1	84.7347
ADAMTS3	1.22839	1.22676	3.8191	5.11418	6.27771	4.48413	5.64378	12.4705	6.18361	10.0143	23.6684	1.42439	5.65919	4.67725	3.55089	7.12306	11.9995	5.96938	6.6102	7.63374	4.11525	13.6579	9.15072	5.55858	16.3107	5.34183	7.96983	14.3021	4.86783	13.6615	5.87004	11.1471	7.3532	9.12876	2.5699	9.43197	5.56065	3.3066	7.63639	1.76704	7.51725	34.0329	5.98318
ADAMTS4	2.05927	0.297508	7.62201	4.05335	1.76136	3.06283	10.2321	0.933557	45.0041	53.8545	24.581	15.0002	4.07906	39.328	0.239397	53.5342	23.2023	8.50842	5.14421	4.08778	8.63827	51.531	5.21574	120.99	12.2271	12.54	45.1529	4.01912	40.6653	58.6493	47.715	4.80915	18.1147	12.9726	18.8586	12.1754	1.93931	372.026	149.916	14.5975	13.0587	116.112	17.8802
ADAMTS5	131.381	106.178	105.718	47.5446	98.6833	150.614	122.744	102.871	82.5442	75.7509	94.4729	63.9052	61.6706	62.0514	83.9573	106.117	75.8769	171.922	96.3857	41.0116	269.619	100.759	100.525	42.2252	139.96	45.3167	84.5815	56.5862	55.4752	45.3876	93.7674	64.522	101.264	51.3944	9.88085	78.6406	128.125	185.193	210.362	131.74	84.2591	59.8047	43.1747
ADAMTS6	6.51456	3.0511	12.323	4.43426	6.24232	4.83395	9.86519	5.3974	10.2959	0.80969	6.88802	5.8632	3.37678	3.97482	8.68549	5.21637	9.36495	17.3361	10.7173	5.47763	10.6894	6.02165	4.8487	7.04173	6.13537	8.15005	7.77232	17.4313	10.2334	12.1705	15.9479	4.90163	23.1231	9.49632	8.90642	11.4433	5.92973	9.72145	8.20972	10.4015	4.73686	29.0366	14.8201
ADAMTS7	13.427	6.81215	16.7357	21.9223	8.59366	16.174	10.494	13.3226	24.7448	9.10334	16.0473	18.8104	10.2159	20.7971	10.5995	14.7712	14.1853	19.1939	17.0311	16.5881	31.564	22.4221	12.2633	13.9392	14.473	14.1266	25.0839	14.7552	12.3536	9.99189	30.381	9.3473	9.46334	18.3285	1.19149	17.4555	28.0977	36.6863	13.7732	77.6332	17.355	24.6299	19.2812
ADAMTS7P1	0.924034	0.968673	0.214237	0.497429	0.627531	0.184644	0.920148	0.569696	0.572095	0.292691	0.490679	0.897583	0.431275	0.390878	0.507483	0.391456	0.719655	0.485992	0.165507	0.108766	0.442989	0.125158	0.151543	0.84621	0.310145	0.235617	1.01192	0.252815	0.9016	0.0567914	1.00997	0.595073	0.253043	0.458505	2.79352	0.376303	0.297316	0.352426	0.678038	0.112435	0.401611	0.672259	0.509159
ADAMTS8	6.35924	6.64168	7.66168	16.3652	13.5812	6.77598	8.14927	6.2556	10.7385	5.41087	15.0487	4.20035	13.8809	4.88824	9.12111	4.19417	9.47226	10.9409	4.70853	5.36992	3.48866	7.97978	9.39599	22.1699	2.70053	10.977	14.5819	12.2013	57.831	20.8874	20.0642	2.73019	12.2113	8.7271	9.26279	5.73041	4.18637	7.3382	17.7559	11.0853	8.35481	7.24691	15.8673
ADAMTS9	22.782	15.2517	20.3528	29.186	15.0679	38.188	24.0044	16.8938	22.9303	14.4378	38.8191	15.6279	14.8251	9.39318	21.0414	18.0235	40.3458	39.1208	24.4279	17.6871	43.5842	46.6215	20.0436	20.3659	26.4194	18.304	63.8565	27.2552	86.8567	49.4642	138.483	28.3264	35.5289	20.5332	3.06933	25.2414	26.3777	43.6126	60.1166	26.3765	22.7273	34.9012	23.6088
ADAMTS9-AS1	16.5922	12.8829	11.0055	17.6077	14.8279	19.0532	28.6361	17.466	5.7974	8.49228	29.3631	5.76997	12.2145	10.7541	15.7077	7.20552	17.575	27.7137	18.0271	23.3631	8.36302	25.287	13.2097	15.9852	17.0353	27.1677	12.123	36.0465	22.7619	36.4516	10.2877	27.5193	19.9676	23.1151	0.146918	6.69391	7.48543	6.19787	29.4466	7.82622	8.58935	24.4097	15.6113
ADAMTS9-AS2	12.5785	18.6456	15.5944	12.1749	19.468	7.80564	10.9585	9.72863	9.25551	8.43403	5.35518	8.8221	13.3775	6.83998	13.6816	9.74311	5.41276	8.32613	6.32546	5.58625	13.6157	4.38272	10.7922	2.48301	10.0457	8.6486	9.55672	12.0333	9.38077	8.46792	7.27849	7.32272	9.35641	6.00676	1.45577	9.62773	13.5949	10.2966	10.0262	5.63571	4.54389	8.70616	7.95563
ADAMTSL1	129.735	94.3159	122.488	137.62	179.668	126.134	169.105	111.624	79.7668	129.295	133.458	56.3332	141.591	58.2836	145.849	144.991	111.015	97.7936	112.675	123.116	126.979	155.154	193.408	60.5348	146.068	122.847	167.44	95.4318	67.7319	62.7437	54.5478	148.154	146.709	94.5011	26.3406	100.142	153.889	91.1619	218.889	51.868	145.241	137.35	106.189
ADAMTSL2	3.21227	2.41535	24.1553	6.26638	0.995476	10.3314	5.3293	13.2558	5.92969	8.54903	11.5021	2.96228	2.4013	13.6494	3.50205	12.9668	10.8189	4.90491	10.7763	8.17177	8.49385	7.91238	5.53486	8.87937	8.1111	4.48916	11.7079	4.6051	4.1056	7.34688	5.27104	7.02333	4.86778	8.2832	1.80234	9.95056	5.87922	4.35861	7.63127	7.75403	9.99467	9.25936	5.19486
ADAMTSL3	12.0358	41.1115	16.4186	36.1248	29.4021	30.8505	16.0334	27.0932	16.7018	22.3711	15.483	19.0247	29.0357	7.43248	45.0095	17.7316	10.4164	10.6355	9.0305	19.6506	16.0411	18.7755	18.3113	10.3249	15.8112	10.1052	22.5538	16.0881	16.4913	15.917	7.29137	18.0151	13.0753	19.7254	2.31555	13.3235	11.9119	16.8993	25.4571	3.24649	11.4832	22.8954	16.1997
ADAMTSL4	21.4824	45.6153	12.1147	39.2578	49.0673	10.0135	43.754	37.4056	47.8703	44.2818	29.6438	40.2917	45.6444	33.4317	42.076	44.8788	13.6094	20.6987	11.7679	28.2056	12.8771	9.32444	19.9647	20.9981	13.8691	19.3	19.5151	14.4453	34.8959	23.498	39.6933	14.5762	9.28429	12.246	11.8976	20.8902	31.2908	20.8748	6.66903	28.4598	31.3316	62.9888	23.7179
ADAMTSL4-AS1	0.0311879	0.140276	0.247622	0.115569	0.122218	0.0997411	0.101331	0.0610251	0.211944	0.189038	0.257832	0.261685	0.518709	0.386935	0.117886	0.269069	0.0398956	0.22373	0.142462	0.0619071	0.0678315	0.096579	0.0566974	0.0161402	0.216128	0.137074	0.211684	0.11774	0.0852469	0.489356	0.320583	0.0995742	0.132055	0.0183604	0.300984	0.0534852	0.148092	0.319148	0.112127	0.14889	0.0419834	0.247441	0.0439399
ADAMTSL5	14.0921	6.04701	3.00024	18.2369	14.9394	52.8728	23.6181	31.5747	21.4704	24.8096	79.9515	6.64784	17.8213	45.135	22.0696	34.1938	79.6515	16.2998	48.0028	64.5456	14.3127	92.6141	44.6901	82.8283	37.4857	42.669	38.9418	20.2954	45.6805	50.699	21.2182	76.1324	21.6638	78.6247	2.91356	24.8666	16.8725	11.9607	35.9278	16.5375	53.3021	31.4288	45.2079
ADAP1	3.36103	3.238	3.14609	1.05628	0.669076	7.45508	4.15499	2.14136	3.93112	1.93187	2.31694	4.39583	1.85199	1.65999	2.79085	3.78392	1.91998	5.61739	1.10331	2.53206	2.69645	1.49338	2.59661	1.63823	2.21044	9.68146	2.45249	1.97639	6.6818	2.19217	5.77203	2.16238	7.18768	2.17609	13.291	8.24356	3.55619	0.424935	4.26437	4.01536	1.76178	2.57031	3.18536
ADAP2	7.28045	3.34468	6.64632	8.73147	4.95126	5.762	5.06142	5.97145	9.51512	7.8371	4.11855	8.21541	8.43068	10.3303	5.82173	7.87358	3.25477	8.10168	6.57013	7.31531	7.66308	6.46959	9.37274	8.96109	8.01659	8.70395	3.18037	6.30519	4.59453	10.2372	10.9014	8.37431	5.27765	8.16372	8.1468	3.42902	4.39195	5.74145	3.49519	3.29724	11.7938	9.75327	5.36935
ADAR	43.5241	46.5361	79.559	69.3505	71.5535	62.5281	49.8316	31.2503	61.8844	38.9677	35.775	39.9252	47.8294	17.2449	54.9652	55.4272	61.0978	67.4076	52.5676	41.1218	81.7977	97.8501	68.5578	16.7346	42.8565	70.3572	75.6058	90.7559	60.7883	61.4962	62.2698	47.5547	60.1581	55.2912	54.279	68.1992	83.4589	66.666	61.8074	40.1537	34.3159	85.5445	72.7034
ADARB1	43.0774	37.6259	66.5505	34.1328	34.3269	46.8705	45.7959	47.2343	45.5661	35.9176	61.2021	21.3444	28.215	34.9262	34.4026	47.131	70.8169	47.0227	49.3395	45.7451	39.2622	44.0035	59.0454	59.8553	46.0938	61.2223	54.4848	49.3466	42.8035	69.4277	53.2251	44.3154	55.3438	76.2374	22.1113	49.03	40.3331	33.1443	32.7613	40.2004	61.6959	57.1475	71.301
ADARB2	0.544273	1.29686	0.188686	0.0660781	0.0977911	0.315639	0.316448	0.101645	0.304631	0.0687984	0.0716932	2.57256	0.335665	0.0352698	2.44021	0.179409	0.0995941	0.240933	0.111954	0.0850861	0.812963	0.193052	0.113299	0.064196	0.138973	0.215341	0.299845	0.151352	0.340696	0.0565564	0.44709	0.0222031	0.204027	0.0731323	4.1313	0.213649	0.993804	0.290143	0.616233	0.223287	0.0838616	0.0495767	0.087772
ADAT1	6.28839	4.31827	12.1212	8.43276	9.46137	12.1774	9.45475	10.5218	11.4297	6.15451	10.6755	6.32011	5.49533	2.46507	7.94067	8.50617	15.8373	9.14466	11.5241	6.5564	7.62096	12.3742	8.48162	6.37956	8.69055	9.39866	10.6584	11.4754	11.5561	14.8086	13.1372	9.34848	14.447	8.2968	10.3308	9.43905	8.66913	10.6632	10.9669	4.97679	7.24084	12.9468	11.361
ADAT2	10.7299	13.5311	9.77886	16.8642	14.8443	13.0408	13.8337	11.9807	12.9446	12.6703	17.8552	12.4553	10.4546	6.89027	12.4125	12.0837	21.4095	13.2139	14.6333	20.9904	9.91642	13.1836	12.8626	12.2891	13.3848	12.412	10.2158	14.3998	12.4734	17.9585	11.597	13.0045	11.5712	13.0221	12.6491	9.65836	9.94271	11.2593	11.4928	5.83068	10.9357	15.1879	13.5443
ADAT3	1.72211	1.33931	0.971789	1.6216	0.786931	0.972506	1.66352	0.690186	1.97719	1.72334	3.29522	1.85132	1.0552	3.79887	1.75673	2.02494	0.750143	1.46043	1.84304	1.31838	0.814096	1.69782	0.607061	2.05303	0.330385	1.0069	1.93794	1.13602	2.21439	1.24643	1.27669	0.980171	1.01957	0.977972	3.11866	1.67231	1.61573	2.91367	1.16396	1.96699	2.21486	1.41105	1.50054
ADCK1	1.67278	1.21998	1.56769	3.12029	1.62663	1.69115	3.31855	2.91383	3.67029	1.45035	4.07799	1.80846	2.80561	1.8336	2.6746	2.32947	2.92765	2.50137	4.7475	3.34379	1.32063	2.1238	4.53812	3.35641	0.973434	4.8812	0.995864	1.12506	3.56301	1.07762	1.92328	3.03125	3.01565	3.45043	2.66317	3.1255	1.84724	2.43701	1.27473	2.94345	3.2721	1.5678	2.63826
ADCK2	20.679	21.0639	19.5548	16.2662	15.6331	23.6326	13.7803	17.5074	16.5116	21.5917	17.6261	16.1907	19.5705	21.1703	19.2182	15.3319	15.8799	14.003	12.6203	16.6427	15.4108	13.8233	14.0373	18.0531	16.5267	13.0316	14.4937	10.9745	12.5597	12.269	13.9581	17.8341	12.5472	15.0989	29.2195	17.4046	15.4766	12.2399	12.4347	12.5175	18.7825	16.324	13.6538
ADCK5	12.4074	7.71064	8.42784	7.2753	5.9968	9.08442	7.47861	8.18506	9.49385	9.77384	6.8443	8.41515	7.19981	11.904	8.19554	9.15535	5.45256	7.17356	8.2068	8.71543	8.45056	6.98748	7.73567	11.1491	7.6076	8.15944	7.70535	5.04192	5.10909	4.3281	6.62909	8.48328	4.67826	8.92793	7.25411	7.22527	8.03436	6.32305	6.19875	13.3731	14.1549	7.12324	9.38017
ADCY1	4.89503	17.2108	10.9916	20.7567	9.64301	12.5783	8.6942	6.14755	12.2334	12.2219	10.8403	11.4468	8.27201	5.35169	25.9592	8.86166	8.04608	23.4105	13.017	10.4612	10.3367	12.2348	16.4095	8.95026	14.1234	8.18971	15.1762	16.8529	18.4203	37.3371	56.7825	22.0485	13.9291	11.3788	3.83014	11.3899	10.989	17.9288	7.71579	6.09158	10.2683	22.7555	10.59
ADCY10	0.0913858	0.0686813	0.21926	0.00397663	0.131559	0.130116	0.000943012	0.0795984	0.233331	0.000291774	0.126212	0.0687544	0.0030076	0.0315088	0.0988995	0.146074	0.000132459	0.21895	0.0896581	0.00157663	0.298402	0.00335333	0.166271	0.0314739	0.226611	0.0958492	0.007502	0.312587	0.111203	0.184255	0.100892	0.194798	0.000748959	0.127904	0.103549	0.0035071	0.144928	0.0607611	0.201089	0.00790436	0.000105947	0.0442864	0.257478
ADCY10P1	5.65958	8.83554	4.70313	8.66391	18.3397	1.79371	3.88488	3.51374	5.6937	9.56347	2.94969	6.41452	10.0556	6.33007	5.9237	3.91769	3.18402	3.16537	7.06977	2.8462	3.40399	2.38436	2.94339	2.43495	3.55106	2.11331	3.67152	5.27721	10.0396	2.61572	2.25193	6.63214	3.2988	3.30886	3.60553	3.1144	5.66636	5.59794	2.59859	4.65658	3.14962	2.97347	2.50035
ADCY2	24.2395	19.627	39.3924	12.6039	16.9765	12.7713	43.049	21.1632	20.0998	22.5364	16.9101	6.49669	15.208	15.0338	20.3289	45.3081	32.3368	38.5166	15.9559	7.85008	10.5843	10.3365	24.2445	21.5291	15.6163	52.1454	10.9497	24.0664	25.0909	16.3148	28.3968	16.4636	62.7353	22.3836	7.80711	29.3279	20.2338	28.5694	46.3966	24.4397	15.1391	26.885	35
ADCY3	16.9913	24.2626	44.8902	40.4829	30.8556	34.0344	34.2324	33.7569	39.4188	23.0525	25.9647	18.9685	22.818	4.02828	37.0194	40.9552	33.1596	43.6919	33.3404	25.0529	45.8371	44.5652	44.8156	21.0886	29.0594	37.455	48.3411	35.2668	37.1074	25.6395	46.6634	34.1747	36.2201	27.9294	15.7311	40.3476	51.0593	31.8873	44.4651	26.2669	23.4542	56.0679	55.4675
ADCY4	54.4806	23.1574	122.444	75.1741	65.2915	49.2466	72.7768	34.515	58.8703	54.9842	33.2565	19.0961	61.8441	33.5474	61.2515	82.8748	59.0692	50.8283	85.3512	51.4785	62.4243	73.6233	80.3233	25.5138	72.4637	62.8766	69.2125	64.5848	40.3193	46.4983	34.7336	54.8727	53.4985	49.9658	13.9802	74.3959	59.2351	46.6658	57.565	62.0023	58.7285	41.6754	47.4288
ADCY5	35.2485	49.1229	42.4762	35.3491	39.5512	53.7418	50.5223	57.6529	47.9746	31.3994	57.26	29.4864	42.5997	54.2221	35.8016	45.1952	47.4305	53.6987	30.242	56.512	28.1852	41.0104	55.8598	78.3296	36.733	41.9042	36.2776	45.6201	39.082	80.3101	25.4967	49.3358	37.3733	46.6768	4.65142	23.4262	27.8343	22.4712	42.1197	36.6647	42.6847	57.2786	50.5716
ADCY6	125.053	121.284	126.923	113.153	95.9475	119.757	120.757	117.027	132.794	115.945	97.3939	103.219	93.4744	106.941	118.759	121.14	151.276	114.724	115.748	108.555	112.396	111.44	140.561	106.043	111.921	115.561	128.486	95.6435	90.6705	97.3799	85.9493	121.042	100.245	106.55	70.9708	96.0272	135.504	115.118	106.684	132.205	137.507	126.015	127.245
ADCY6-DT	0.0473245	0.187989	0.0460534	0.0322524	0.202477	0.0162848	0.123449	9.47635e-05	8.90469e-05	0.0838108	0.0140587	0.141751	0.0298232	0.102944	8.78969e-05	0.0292228	9.66493e-05	9.72975e-05	0.0013616	0.10822	0.0331082	0.000106291	9.55554e-05	0.140655	0.060262	0.000107019	0.0172861	9.7654e-05	9.712e-05	0.0551335	9.71798e-05	0.0495374	0.00010746	0.0179002	0.0086789	0.0174447	0.041312	0.00133759	0.054703	9.46079e-05	0.0205165	0.0242202	0.0855624
ADCY7	6.6006	6.43869	5.77399	10.3916	7.38016	13.7193	9.44009	6.21735	22.0848	8.08868	5.33233	18.6179	6.57671	2.19243	13.54	11.4154	7.00728	9.72804	8.51527	6.93977	9.38281	10.4631	14.6788	3.44512	11.1056	9.35901	9.49555	9.86495	14.2822	14.7334	22.3034	9.86791	7.58483	8.64988	23.63	9.37465	10.9189	9.09615	9.57016	2.05531	9.00825	24.9062	10.7824
ADCY8	9.18271e-05	8.38274e-05	0.0118806	0.033084	8.4978e-05	0.0997411	9.85261e-05	9.47635e-05	0.01333	9.019e-05	0.0716932	7.66278e-05	8.48689e-05	0.052853	0.0505726	8.94826e-05	0.0995941	0.0172998	0.101784	0.185529	0.0678315	0.17927	0.0189628	0.0161402	0.0772488	0.0392405	0.0529948	9.76526e-05	0.0568637	0.263547	0.0169648	2.5644	0.000107459	0.237448	36.6849	0.178057	0.0423778	0.0291039	0.000102874	9.46079e-05	0.397948	0.0495767	0.0439399
ADCY9	33.3817	35.714	56.5072	49.4583	43.4183	36.3706	44.1626	43.4231	46.6744	37.343	32.102	29.2421	44.617	30.4367	46.7327	45.079	40.018	45.8621	38.0744	39.505	43.1161	41.1939	51.6587	35.193	38.2537	49.6213	41.2946	43.9144	39.169	49.2263	45.4584	34.4855	40.4001	43.5438	45.3296	41.3224	44.4845	35.1534	44.7163	31.9353	39.9938	56.8862	56.1051
ADCYAP1	5.4538	5.91933	0.420542	1.2863	25.0454	0.123206	6.71819	2.02398	1.6144	2.771	4.21432	3.16683	6.24837	9.85431	3.00138	1.02139	0.17535	1.1186	0.0526969	2.96865	1.08967	0.0386592	0.0176885	2.59112	2.56351	0.675178	0.229128	0.188149	3.16602	2.20233	1.1175	2.14163	0.405134	0.136297	0.37924	4.77836	0.216955	0.747678	6.93805	0.364301	5.02092	0.000110508	0.981024
ADCYAP1R1	1.2239	14.5934	3.5603	8.58178	9.61882	3.49504	1.80039	4.30155	6.10245	4.35866	4.96008	25.6658	5.38249	4.43486	21.113	4.16837	6.35542	5.87449	4.02908	4.66756	6.5165	4.59014	1.77903	3.97862	5.99115	7.49396	6.14555	2.85047	6.28447	3.9115	1.65553	6.50551	7.15799	3.48603	67.2524	1.42846	3.02515	5.57296	5.14168	0.666398	5.46776	5.34159	2.54456
ADD1	93.6353	85.0677	167.174	145.797	127.987	118.669	132.745	144.99	131.605	129.47	112.285	85.6891	117.75	103.392	114.195	126.828	123.746	137.467	128.018	119.926	127.42	118.022	134.054	120.195	133.93	174.614	148.225	120.169	132.628	124.004	142.429	116.069	161.24	143.954	111.878	154.355	141.645	97.4073	110.302	97.1197	139.992	169.313	156.081
ADD2	5.62728	2.73339	13.8255	6.22327	7.06306	7.70923	5.17977	3.41918	6.56271	7.05389	3.32778	3.57123	7.09281	8.58766	5.69862	10.2425	5.31372	6.64952	10.0308	5.88548	8.56969	8.3929	7.28478	3.51275	7.34264	4.13809	8.75354	7.02848	4.78998	10.0749	3.40811	4.65453	8.68068	6.4815	2.26889	9.43288	4.15608	3.40316	8.1161	2.49009	3.66215	4.39289	4.79198
ADD3	33.3616	24.5005	25.5684	55.2296	59.4114	57.7645	43.3664	41.8288	38.0161	45.5466	28.8819	26.5883	47.4241	25.7567	34.6192	37.6958	23.9537	33.1541	39.3922	33.7292	38.9445	45.5956	48.5839	33.7013	51.3635	43.8469	29.716	46.6308	29.5957	74.0759	43.5116	41.8692	36.3723	44.2139	6.90118	31.1935	24.302	32.0408	47.3657	22.5527	38.5881	48.9978	38.3626
ADD3-AS1	1.01071	0.579281	0.29616	0.66051	1.22309	0.682588	0.924557	0.99529	0.304905	0.687173	0.630902	0.421956	0.488202	0.562767	0.791025	0.611268	0.199092	0.657128	0.478681	0.557318	0.49176	0.345227	0.584981	0.660691	0.448299	0.529004	0.44221	0.505989	0.384456	0.73635	0.271614	0.464608	0.480317	0.511849	1.35361	0.734929	0.402757	0.262059	0.356856	0.409281	0.818971	0.694406	0.419649
ADGB	9.18271e-05	0.0877038	0.0354547	8.98604e-05	8.4978e-05	0.0333109	9.85261e-05	0.0204049	0.0530528	0.0344443	0.000101141	7.66278e-05	0.0763531	0.052853	0.269343	8.94826e-05	0.0398956	9.72975e-05	0.0712759	3.04766	0.16944	0.0276699	0.0566974	0.0161402	0.0463867	0.000107019	9.8385e-05	0.0169037	0.0710553	0.0753737	0.194075	0.0166766	0.0600838	0.0183604	44.734	0.249241	0.126949	0.471028	0.0187735	0.0558928	0.0210443	0.000110453	0.00010788
ADGRA1	9.18271e-05	8.38274e-05	0.0136071	0.0825106	8.4978e-05	9.58231e-05	0.0506749	9.47635e-05	0.0265502	0.0172538	0.0287155	0.0436439	8.48689e-05	0.0528117	0.0673483	0.000337653	9.66493e-05	9.72975e-05	0.0102515	0.0309774	9.22969e-05	0.0138773	0.0378005	0.000121546	0.0155125	0.000107019	0.035335	9.76526e-05	0.0142776	0.00010431	9.71798e-05	9.70507e-05	0.000107459	0.000103092	0.742994	0.0178793	0.0212184	9.95428e-05	0.000102874	9.46079e-05	0.125641	0.148393	0.00010788
ADGRA2	218.506	182.187	140.054	315.868	204.693	196.912	196.88	232.815	260.908	189.696	213.295	226.085	211.252	142.844	221.634	202.022	231.369	239.668	157.531	176.845	173.629	221.36	210.691	246.077	183.202	273.048	205.301	180.55	214.775	184.268	235.969	170.142	100.471	174.584	93.8232	135.429	237.653	163.11	237.727	157.406	197.295	221.319	225.712
ADGRA3	52.0239	62.9288	48.3742	50.0192	53.6285	55.3697	49.2115	62.6364	60.1802	42.6336	71.2485	66.623	52.7014	42.5164	59.7411	50.1697	78.225	57.0954	54.8539	63.2017	81.7444	74.5184	54.734	51.468	55.0735	56.3523	73.9669	58.6197	60.2152	64.2426	94.847	58.1997	64.4626	67.3331	182.652	49.7755	73.6405	82.3435	57.9351	92.7739	49.7305	62.6985	65.4852
ADGRB1	5.93945	4.36356	3.04115	10.4592	8.91577	3.77001	3.99876	11.3737	5.85259	7.93589	7.1593	4.52009	9.07601	7.50815	6.71464	6.77438	3.56211	4.23192	3.67125	6.5366	4.08138	6.46378	5.56594	4.58145	6.18794	7.14196	9.85647	4.26884	8.03256	1.90066	2.98567	4.5042	2.61507	6.1163	1.16301	3.66607	7.56922	3.13257	4.66776	4.72434	6.38653	5.63926	3.79158
ADGRB2	0.776942	0.0946904	3.38808	4.52695	1.12218	8.90302	3.96844	2.2475	6.27303	2.52941	8.41461	1.49064	1.05877	4.5253	2.1338	3.51319	9.14688	5.4895	8.50401	6.24475	3.92029	11.2767	6.19044	8.95293	5.41223	9.23281	11.5924	6.51408	6.01962	3.8864	5.77309	9.83838	8.70689	11.2192	0.579193	6.36468	5.10039	4.04044	5.39781	4.58707	8.21373	8.63779	10.3763
ADGRB3	3.26518	1.80506	9.45331	12.8678	24.9152	9.98123	6.31444	12.8361	6.47491	15.2533	48.067	2.06388	16.3367	11.4644	4.03892	10.5501	2.78603	6.02099	14.3288	21.5644	6.90949	20.3972	31.4518	4.83774	25.3379	5.57663	12.7129	3.81508	3.98795	14.9223	2.73266	46.0912	7.95297	5.42253	0.634409	1.69072	4.75722	2.49448	9.35409	2.17622	27.8282	22.5814	5.89552
ADGRD1	20.7206	30.9665	10.9206	38.1146	19.3256	38.5451	24.8605	20.1328	44.9281	31.0254	41.6743	29.4953	17.6247	15.6603	40.3626	33.707	25.6204	19.6929	36.1652	23.821	15.277	31.8642	28.7573	20.6894	39.7429	23.9878	28.8893	22.9009	30.4924	38.1457	21.8082	31.2523	23.231	32.8904	9.519	23.1898	23.0657	28.0877	38.9756	11.2661	41.6762	51.817	38.3846
ADGRE1	0.218654	0.00519049	0.00381437	0.100448	0.161706	0.00277143	0.0749906	0.000249489	9.39134e-05	0.000581967	0.000114287	2.00469	0.00483001	0.095528	0.0121106	0.532267	0.000107635	0.00198768	0.0500349	0.0855859	0.000106324	0.0328804	0.000109413	0.000142136	0.0133021	0.00656659	0.244643	0.216311	0.14499	0.31212	0.228719	0.184438	0.0039725	0.00743865	0.416954	0.0712803	0.000124368	0.000117663	0.00442016	9.46079e-05	0.00931883	0.0417789	0.000111905
ADGRE2	3.46174	2.60344	1.99667	3.52949	1.25843	1.15403	0.155441	1.98981	2.23986	1.28026	0.735674	8.36263	2.34312	1.27958	2.04239	1.87939	1.26682	2.06163	1.95682	1.52225	1.91409	1.83734	2.63043	1.78244	1.81059	1.95051	3.73515	2.10772	5.01692	3.89203	8.00772	0.717285	2.29981	2.17053	2.51889	2.52879	1.68863	3.06811	1.62387	1.02021	0.901284	2.56131	0.905128
ADGRE3	0.0156399	0.000103219	0.0354546	0.132066	0.000102998	0.000105012	0.000110195	0.000109747	0.155355	0.107752	0.114648	0.637798	0.0501016	0.0352698	0.000102775	0.61106	9.66493e-05	9.72975e-05	9.38134e-05	0.000103317	0.00261855	0.000113917	0.0113511	0.112252	0.124728	0.000121454	0.00100589	9.76526e-05	0.580176	0.577849	0.360655	0.0984283	0.21521	0.000106459	0.803188	0.1762	9.21523e-05	0.0316191	0.410854	9.46079e-05	0.000139938	0.366199	0.00010788
ADGRE4P	0.466533	0.24542	0.141538	0.132066	1.026	0.398677	0.303794	0.629708	0.344354	0.240569	0.286469	1.51159	0.183129	0.211102	0.40397	0.976384	0.318489	0.22373	0.945845	0.24734	0.880702	0.523815	0.773653	0.144289	0.555611	0.743643	1.18145	0.521086	0.567762	0.414086	1.21457	0.375899	1.21163	0.456536	0.455498	1.05006	0.570948	0.493174	0.541551	0.223287	0.565461	0.272175	0.394596
ADGRE5	119.052	100.708	108.236	66.1262	46.848	144.609	151.214	151.165	130.973	122.434	140.45	73.7048	57.3047	128.971	122.769	118.134	155.932	125.886	70.6402	164.29	203.251	136.661	138.203	380.347	147.965	148.596	190.445	78.1103	190.259	166.132	245.525	119.413	219.508	345.71	35.504	93.8119	151.436	293.766	338.029	239.987	150.281	167.025	226.478
ADGRF1	9.18271e-05	0.0526558	0.0354547	8.98604e-05	8.4978e-05	9.58231e-05	9.85261e-05	9.47635e-05	0.01333	9.019e-05	0.000101141	0.815503	0.0610995	0.000103314	0.0169157	0.0100517	9.66493e-05	0.08611	0.0275454	9.61919e-05	0.0676775	0.0138881	0.0755646	0.000121546	9.35412e-05	0.000107019	9.8385e-05	0.672341	9.712e-05	0.0565564	3.19328	0.0166766	0.0840743	0.000103092	0.390412	9.72288e-05	9.21523e-05	24.4204	0.426103	1.26485	0.000105181	0.000110453	0.0220239
ADGRF2	9.18271e-05	0.0176078	9.35396e-05	0.0495811	0.0122982	9.58231e-05	9.85261e-05	0.182886	8.90469e-05	0.0344443	0.000101141	7.66278e-05	8.48689e-05	0.0176866	8.72566e-05	8.94826e-05	0.0398956	9.72975e-05	0.0204289	0.038728	9.22969e-05	0.000106291	0.0378301	0.000121546	0.0155246	0.000107019	0.0177305	0.0169037	0.0142888	0.00010431	0.0422663	0.0277296	0.0360932	0.000103092	9.08642	9.72288e-05	0.0846634	0.0871126	0.0187735	9.46079e-05	0.000105181	0.000110453	0.00010788
ADGRF3	9.18271e-05	0.362625	0.181493	0.477289	0.414502	0.100762	0.0485296	0.175493	0.191765	0.196173	0.278792	0.384469	0.120057	0.231259	0.354832	0.239265	0.0657845	0.000104981	0.157306	0.0994565	0.146567	0.239375	0.215514	0.135873	9.66665e-05	0.121451	0.0676902	0.250299	0.0969729	0.10934	0.103739	0.164472	0.1886	0.260215	0.377969	0.243309	0.573053	0.0842168	0.297157	0.11709	0.201573	0.194961	0.266252
ADGRF4	0.0462905	0.0278544	0.681775	0.0295009	0.0775031	0.148834	0.389785	0.181139	0.259353	0.231139	0.00577379	0.0144716	0.120948	0.0593152	0.117789	0.0217969	0.44967	0.078473	0.540841	0.0567251	0.114149	0.00283632	0.041207	0.0159871	0.220059	0.0156109	1.1857	0.010085	0.0141532	0.0187419	0.443552	0.0154235	0.140971	0.0218026	5.25501	0.183407	1.72374	0.149962	0.0407858	0.897184	0.0415833	0.107896	0.109688
ADGRF5	41.7967	53.9905	123.47	75.1554	73.9472	66.3429	66.9973	48.8058	47.3041	62.3097	29.2377	27.6343	52.4602	37.7256	72.9716	74.7777	47.7147	54.9966	74.5276	45.4736	62.0113	55.9087	79.1315	25.3025	59.0311	50.5051	83.9646	87.4513	46.9798	70.7862	58.2471	54.9243	104.554	45.9155	21.999	109.435	71.7451	50.576	60.5415	34.5274	35.5514	59.7879	56.8711
ADGRG1	7.36634	11.7378	21.9347	12.3698	2.17097	11.405	13.5923	9.5282	9.49305	11.3576	6.91372	1.40724	7.08373	2.70386	10.6056	20.692	9.88415	3.51403	9.79171	6.1663	6.36825	13.241	11.7361	2.42977	13.5405	12.3021	27.3599	11.6379	9.73465	5.17681	9.86782	7.53387	11.7694	9.59839	7.22598	10.2286	9.7553	10.6534	14.0633	1.75571	10.7319	16.0235	10.1418
ADGRG2	0.0190524	0.308633	0.165668	0.101602	0.107242	0.022448	0.137829	0.0510723	1.04496	0.0414038	0.0577358	2.88119	0.00428281	0.0502647	1.31905	0.332355	0.0509182	0.040984	0.0814077	0.043783	0.0201236	0.343212	0.168895	0.162437	0.0922118	0.566037	0.131885	1.86126	5.85047	0.141568	5.66414	0.158625	0.0163753	0.0377793	3.38406	0.0542782	0.0472737	0.876184	0.198751	0.0307517	0.0656182	0.10472	1.22401
ADGRG3	0.294877	0.0258801	0.0378136	0.670484	0.764688	0.531173	0.286176	0.0182933	0.298435	0.875923	0.885796	1.11839	0.325656	0.335673	0.0614796	1.25536	0.716528	0.798546	0.165531	0.121299	0.0532017	0.0212759	0.324775	0.0370299	0.570942	0.0451906	2.63678	0.771979	3.08856	2.44345	15.6738	0.671142	1.72624	0.0129567	4.03086	0.442065	0.418035	3.12356	1.30792	0.530985	0.101957	1.25014	0.0253561
ADGRG4	0.311053	0.280468	0.365492	6.92886	25.6724	0.066526	1.759	2.417	0.582691	4.74096	2.09059	0.0727456	16.0012	0.158352	0.925652	1.72355	0.0398956	1.04945	0.386528	0.208708	0.152505	0.0552335	2.26417	0.640866	0.262421	1.07628	0.793545	1.89918	1.05028	5.70176	0.0253987	1.44252	0.55189	0.547822	0.0732795	0.0534852	0.486377	0.20313	0.317503	9.46079e-05	0.691096	3.63588	0.131604
ADGRG5	0.491001	0.754679	0.264235	0.0795982	0.305997	0.320289	0.240159	0.409713	0.970187	0.0585276	0.427988	4.05945	0.0825255	0.0797106	0.42094	1.03925	0.335995	0.395556	0.520968	0.0429758	0.28749	0.00263188	0.487858	0.0398926	0.659393	0.293037	0.0413004	0.692189	0.368594	0.599099	0.416784	0.25664	0.231376	0.310879	1.02944	0.0294384	0.467506	0.0131759	0.484442	0.0639003	0.125487	0.444625	0.459643
ADGRG6	0.474642	1.03271	5.35474	6.55848	9.58182	2.0303	3.86977	2.09727	5.2435	2.38594	2.56449	1.25388	7.05452	1.38214	2.56613	2.89662	0.767289	3.24425	2.88819	1.61322	0.731928	2.43029	3.31841	1.12286	4.26157	0.788142	1.23852	8.79982	2.01578	10.6565	0.827589	3.85073	2.32742	1.82174	6.34635	2.02043	3.07791	1.67479	1.23363	1.11453	3.10794	6.66195	1.82552
ADGRG7	0.0311879	0.0176078	9.35445e-05	0.247546	0.110004	0.512916	9.85261e-05	0.0785279	0.051223	9.02188e-05	0.0287379	7.66339e-05	0.176695	0.203816	8.72707e-05	0.653689	0.159286	9.73192e-05	9.00921e-05	9.62114e-05	0.129523	0.00010632	9.5595e-05	0.000121553	0.119277	0.000107019	9.84072e-05	9.76596e-05	9.71319e-05	0.150643	9.71833e-05	0.149377	0.024098	0.000103123	8.86552e-05	9.72288e-05	0.145849	9.95428e-05	0.0719864	9.46079e-05	1.05136	0.170618	0.00010789
ADGRL1	51.4573	37.3163	29.494	40.6096	28.5837	69.5406	33.5474	41.7187	37.2598	24.8655	62.4605	38.4226	27.5277	37.9603	56.9741	33.7487	62.9856	64.3078	44.9957	38.8528	48.7369	55.6771	30.8015	43.0934	40.2195	47.4868	53.2991	32.7777	35.7186	26.1448	33.3283	36.1284	33.7376	48.0226	35.3205	25.3891	40.7797	36.7286	44.9308	58.9194	37.6855	40.402	51.9592
ADGRL2	8.14659	14.9411	15.5898	18.2602	20.8665	9.23299	11.5543	14.5465	11.0226	13.6107	8.64782	11.2616	22.6088	5.54678	17.5837	12.5451	8.40617	7.65313	11.8041	12.6826	10.9547	9.47045	9.68927	7.34667	13.6717	10.8732	12.1034	18.1621	15.8268	24.0527	8.42578	10.3378	16.654	5.62621	30.3755	15.5188	6.42706	10.3895	5.30921	3.21496	8.44952	7.52766	5.22721
ADGRL3	5.29708	3.67321	8.83771	15.0438	15.348	2.51601	8.97168	11.0718	9.85355	8.19647	9.66895	3.49864	16.9121	4.05172	3.9536	5.34406	5.41778	8.14608	3.33286	4.7185	5.34894	2.55877	9.89034	2.66663	10.667	1.9754	7.85452	8.96603	4.40313	20.6745	0.836506	15.7422	4.68588	4.42704	0.375673	1.49866	9.98896	2.67599	3.33878	6.31111	7.7753	16.269	5.36152
ADGRL4	50.5934	36.6953	93.3182	53.6816	50.905	52.3305	43.8968	51.5471	47.7205	47.0996	39.7766	32.8029	60.9842	55.2994	45.235	79.3689	64.2556	45.8449	64.2911	48.9079	52.0069	49.0634	49.3757	42.4975	66.6159	41.1294	53.3902	66.5522	44.4057	94.6514	55.6971	59.3935	63.0712	44.1463	8.48209	53.9931	49.7491	46.059	60.0448	37.7383	56.1379	43.0604	45.8923
ADGRV1	0.0258353	0.686774	0.0196098	0.163979	0.404522	0.0184276	0.0140663	0.100979	0.248555	0.227616	0.0949312	0.890447	0.252645	0.0195121	0.557355	0.0495738	0.033045	0.0475687	0.0618289	0.0214175	0.0468249	0.038138	9.55554e-05	0.0178033	0.0426764	0.000107019	0.0779495	0.0557505	0.736353	0.0208754	0.0838824	0.0305985	0.0332091	0.0404088	0.475852	0.0295627	0.105113	0.528358	0.0310165	0.061686	0.0232183	0.0137609	0.0122036
ADH1A	0.770693	0.322256	1.08745	2.66622	4.26265	0.778573	1.08412	1.10014	0.983657	2.5646	0.948672	0.0753387	1.56803	0.944119	0.0346692	0.672107	0.180598	0.565734	0.572504	1.12242	1.35121	0.413985	0.93095	0.483065	1.62861	1.40936	1.21511	0.0171636	0.458023	0.385185	0.0867808	0.841188	0.371288	1.1937	0.500007	0.694537	2.65935	0.237144	1.40935	0.0949653	1.73598	0.975435	0.476538
ADH1B	310.81	125.448	189.353	478.982	534.969	250.003	333.855	220.965	155.952	409.934	198.587	29.2596	501.138	204.2	307.238	238.97	43.4334	230.397	199.864	181.338	299.147	114.992	263.17	99.7401	348.653	253.96	293.784	294.171	157.887	207.053	48.1217	233.868	146.703	177.504	72.0442	157.274	362.814	177.274	162.395	81.3882	216.189	186.164	73.6351
ADH1C	10.1702	8.76844	4.2655	5.56527	13.3223	2.34934	2.32169	2.87756	3.44552	3.65904	2.25905	11.2719	6.35046	4.01316	3.74554	2.44097	0.908194	1.61606	2.41242	1.51086	2.41747	0.866907	1.70975	1.42495	1.78439	1.32591	1.6355	1.54944	1.10215	0.958236	2.52271	1.04489	0.504129	0.909774	1.01768	2.23611	7.67847	3.09975	1.1732	3.66006	1.44866	1.08808	1.13086
ADH4	0.0877839	0.0495021	0.0222535	0.0621196	0.172294	0.0157071	9.85261e-05	9.47635e-05	0.0249823	9.019e-05	0.0673985	0.109372	0.114794	0.000103314	0.0159062	0.00945406	9.66493e-05	9.72975e-05	0.00964943	0.0218848	0.047849	0.0648816	9.55554e-05	0.07541	0.058115	0.0736789	0.0332472	0.0158956	0.0801389	0.00010431	9.71798e-05	0.015682	0.0113831	0.0344273	0.00773313	0.0168257	0.0994646	9.95428e-05	0.0527547	0.0175783	0.000105181	0.000110453	0.00010788
ADH5	255.315	249.612	267.826	176.321	193.641	251.173	219.889	183.806	164.188	156.964	203.092	171.121	159.828	165.406	173.232	207.851	159.116	209.699	199.534	213.526	248.213	206.727	206.54	196.148	174.016	187.371	216.223	192.278	186.606	206.746	151.708	236.501	183.983	217.207	93.5054	266.104	249.464	265.071	218.353	278.005	187.761	176.1	209.013
ADH6	9.18271e-05	0.000116704	0.000128171	0.131907	8.4978e-05	9.58231e-05	9.92263e-05	0.0334306	0.0880095	0.0282836	0.000101141	7.76027e-05	8.48689e-05	0.000120694	0.000145599	0.0315255	0.00685976	0.00133861	9.15897e-05	9.61919e-05	0.178061	0.0003534	0.01894	0.000121546	9.35412e-05	0.000459996	9.84379e-05	0.000106627	0.233396	0.000104311	0.000141124	9.70507e-05	0.000107459	0.000103092	20.4154	0.00953154	9.21523e-05	0.378761	0.199149	9.71627e-05	0.000106898	0.056782	0.000107925
ADHFE1	19.6684	23.7101	19.2248	14.5505	28.8723	14.349	21.5625	22.8083	12.0494	18.9636	15.4497	20.9288	30.9802	18.8142	24.1826	18.1014	11.1637	16.0845	13.3932	19.2542	17.7478	9.95057	21.7352	13.3436	15.6472	19.5473	17.1033	26.9907	12.9429	16.4088	10.34	13.3742	17.4052	16.3952	20.6968	12.5997	19.4092	11.4278	18.6707	11.6433	16.877	13.7022	20.8861
ADI1	54.5187	51.0855	55.5264	35.5096	40.4424	54.0307	79.6869	76.6029	56.2622	56.5466	62.2405	47.3257	40.1476	81.8424	27.7835	37.2113	42.5585	85.9368	56.3122	51.4026	48.6057	59.8542	70.6539	89.3532	62.4973	111.942	54.3589	77.0148	61.7095	72.3851	65.4344	70.7324	90.0358	103.623	49.8184	60.1502	46.4826	58.5957	64.7181	61.6835	81.2625	71.1768	68.1251
ADIPOR1	49.6437	51.218	52.925	50.7701	42.5603	49.8983	53.3597	46.57	51.3174	43.2661	54.0659	51.0396	51.456	27.6102	56.2419	52.2682	41.1121	51.0854	45.1683	38.1877	54.1147	55.4024	59.1208	43.3525	55.584	68.6377	67.1068	54.8714	80.8473	59.6916	57.0173	54.9134	66.9942	52.7731	116.387	62.1381	50.0129	63.2381	55.6388	41.2381	37.1484	55.6543	50.8398
ADIPOR2	34.5485	36.3327	48.7266	35.4344	33.5303	31.8205	39.6994	40.0679	23.2102	30.2677	43.8225	24.33	27.0635	40.7373	34.6655	33.6382	34.389	28.4733	33.6808	35.2503	30.5328	42.3903	33.8018	37.8412	37.4528	27.3284	44.3007	30.9957	49.4027	35.7894	26.951	25.9161	43.6212	25.3118	22.8717	55.4868	39.0351	32.6854	40.4279	29.8408	27.8145	42.2473	38.9602
ADIRF	162.824	82.4908	116.758	170.726	194.125	66.436	244.661	146.217	187.109	200.71	127.939	39.5718	190.648	338.383	110.832	170.977	77.0301	97.7372	167.062	185.404	70.8855	93.6199	206.431	245.025	126.569	134.972	105.104	91.5107	84.5843	196.473	26.0924	91.4151	61.4727	88.5343	51.8322	72.2273	96.302	48.8914	107.95	105.83	231.623	93.7576	85.0706
ADK	7.50656	5.57461	9.41652	6.50784	7.39503	11.2981	10.74	9.30968	5.3607	6.79853	11.4777	8.30946	5.12479	8.01479	6.27601	4.96609	6.48147	5.8771	8.88725	12.1052	6.67568	14.2263	10.0587	9.05894	13.2524	6.61128	8.35763	8.8055	8.73656	9.32879	7.68196	10.7393	8.49127	6.73915	8.36156	9.46884	6.63922	9.07879	8.69665	8.64086	6.54383	10.788	8.66744
ADM	16.2633	8.67446	15.7476	16.0022	14.9369	3.13892	7.27615	4.24491	4.34312	8.03896	4.46744	4.21488	18.6858	19.0428	22.567	5.02104	1.21397	3.25138	7.52545	3.93281	8.1288	5.73334	4.09429	3.65237	11.5888	4.59829	13.5945	6.80656	6.7837	5.75822	11.9255	7.11824	6.58551	4.78352	5.7659	10.4819	11.5018	8.75942	4.3877	4.48255	12.3123	8.4341	2.23554
ADM2	0.282596	0.159287	0.115415	0.242194	0.0342253	0.174185	0.0708432	0.0142882	0.138888	0.06011	0.0501323	1.33847	0.117343	0.0492546	0.270575	0.153252	0.153068	0.144359	0.113798	0.16208	0.047431	0.26015	0.118762	0.0896768	0.16185	0.0684768	0.19725	0.0940554	2.78589	0.105306	0.032143	0.0541669	0.0587866	0.165969	0.0796529	0.0498432	0.0444183	0.28387	0.0261983	9.46079e-05	0.117169	0.121101	0.0613708
ADM5	6.29705	3.62755	5.29248	4.63577	3.19996	3.12232	3.88488	5.30103	5.78638	12.9172	2.66332	2.87777	4.14908	12.8183	3.58455	7.34223	3.8805	2.25363	5.14581	2.78159	3.01449	6.14679	3.88675	6.32748	8.99568	4.28522	6.13608	1.74793	5.98897	3.66949	3.93026	2.89546	2.02731	2.7387	5.67644	4.8762	2.60066	3.82868	4.81712	4.42675	3.76915	2.27556	2.91494
ADNP	85.9025	117.013	74.5538	93.7124	106.697	86.4121	82.1767	89.7627	77.8207	74.7542	106.748	79.6803	97.2792	71.8773	87.5567	74.8604	112.827	97.8017	87.5204	92.1463	94.0201	89.0932	87.3455	69.2169	82.3668	78.8716	67.5679	98.831	64.5234	92.2581	66.7062	86.535	74.7198	84.2586	58.8881	67.9894	78.3832	82.0859	91.4056	103.284	71.4257	74.0521	92.1811
ADNP2	22.7469	26.7943	31.0236	26.6429	21.3611	28.8308	27.6744	25.9767	27.5677	24.0308	30.7417	23.8355	23.6127	18.5153	22.4492	33.9612	32.4164	31.0851	22.4236	21.1935	33.9036	36.5495	31.6405	21.5131	23.2238	28.3914	28.335	29.0746	29.7316	36.3741	23.3534	21.6308	28.9327	24.7935	27.5524	25.8221	29.6846	37.4157	30.6386	23.9561	20.2482	33.6866	33.4878
ADNP-AS1	1.20953	0.899202	1.1694	1.06974	1.28247	0.898678	0.993427	1.46947	1.17192	1.1049	1.33056	1.01493	0.886271	0.926519	1.43443	0.77239	1.59072	1.56934	1.50439	1.38077	1.36281	0.915455	1.17613	0.884808	0.915593	1.30063	1.21383	1.25879	0.696603	1.1914	1.24847	1.06169	0.949888	0.712799	1.95241	1.00556	0.739667	1.64176	1.60493	1.79193	1.09728	1.10915	1.12412
ADO	29.1216	31.2454	24.47	29.6618	27.0158	35.5403	31.2681	25.1237	29.011	24.1854	46.2772	23.385	24.2381	29.9619	24.7884	30.0959	36.9535	34.6116	34.6473	34.1506	30.6013	38.1482	34.7536	39.8865	30.4918	33.8897	31.1914	37.3432	43.6394	45.5757	34.6716	26.4776	35.5541	39.8741	28.0972	33.154	27.1686	30.2517	35.2876	40.9374	33.6074	25.3763	41.531
ADORA1	0.0207362	8.38291e-05	0.191632	0.362956	0.00341088	0.526107	0.421202	0.00616388	0.0195189	0.0129027	0.0122054	0.514331	0.195848	0.0359525	0.00373252	0.112654	0.0295038	0.0402619	1.00741	0.0289121	0.234478	0.569324	0.41614	0.978524	0.556939	1.05777	0.30743	0.0114724	0.179887	0.139768	1.92222	0.213577	0.528058	0.738584	0.709427	0.303978	0.374708	0.053465	0.00627885	0.315609	0.0563323	0.0816143	0.641717
ADORA2A	3.23565	1.39877	0.204333	1.34256	2.13379	1.01111	1.00682	1.69274	2.73405	2.92981	2.20868	2.43706	2.17175	1.02587	0.446645	2.79074	0.160787	1.59816	1.93904	2.53781	1.58635	1.06063	1.79745	2.70187	3.65137	0.775429	1.20205	0.00263212	1.31177	0.0452229	0.0350977	2.58569	0.000972639	2.73108	0.173148	1.06698	1.06528	2.0623	2.06813	3.40005	1.83954	0.120307	0.534551
ADORA2A-AS1	0.470496	0.403136	0.660389	0.758565	0.528698	0.513685	0.572093	0.156079	0.741355	0.306349	0.545362	0.524728	0.70455	0.140769	0.776559	0.805716	0.238891	0.551978	0.489207	0.379625	0.663866	0.788584	0.394029	0.160802	0.557275	0.608213	0.703659	0.926876	0.388471	0.492571	0.364371	0.729282	0.368247	0.510994	0.352854	0.491117	0.657794	0.803123	0.840394	0.483679	0.314903	1.16257	0.749468
ADORA2B	2.28565	6.85197	1.24952	2.50764	3.77399	3.05588	1.18957	1.34056	1.35067	0.58411	0.959434	5.55199	1.92204	0.316602	2.7263	0.916611	1.09457	1.42791	0.793304	0.185529	2.47257	0.165488	0.207635	0.801053	1.35803	1.36978	1.32251	0.268995	0.652912	1.05388	3.88809	1.52541	0.216022	0.803425	1.78106	0.818713	1.45895	1.68235	1.04566	0.297685	0.942365	1.1131	0.964413
ADORA3	0.640224	1.03567	1.2425	0.692241	0.322664	1.79779	1.02727	1.03189	1.03622	1.51121	2.28029	0.404235	0.787898	1.77317	1.55928	2.03387	0.37763	0.361442	1.42662	1.37383	1.08745	0.483915	0.805608	0.536671	1.15748	0.494497	2.4287	2.90314	1.59036	0.77446	1.53598	0.776026	2.02485	0.757277	4.81611	2.09936	3.01584	0.9651	0.672093	0.840243	0.410799	4.37344	0.837876
ADPGK	9.73442	13.6811	12.8347	13.1091	12.787	7.00908	10.3983	7.27257	10.635	11.8821	14.5636	17.2046	12.2199	4.74955	11.2973	11.5076	14.8698	12.3858	11.5939	10.2855	9.64121	9.79805	12.7517	8.0637	13.1062	11.4235	10.7838	6.94598	9.65666	15.7838	14.4666	7.94322	8.23606	5.27194	14.1793	13.3779	12.6335	14.9331	9.5588	10.8911	8.52616	12.9268	7.52886
ADPGK-AS1	0.127538	0.215289	0.186849	0.227084	0.0635151	0.221252	0.118309	0.128935	0.165938	0.0361785	0.0446914	0.118865	0.0472642	0.0178313	0.052928	0.0833638	0.0833288	0.245082	0.0426108	9.61919e-05	0.245165	0.0577635	0.07844	0.000121546	0.0639671	0.0205555	0.0734394	0.243218	0.178088	0.114987	0.345418	0.0983696	0.110836	0.210913	0.146953	0.0371609	0.219528	0.0607708	0.0194002	0.0578045	0.0446486	0.18071	0.00010788
ADPRH	6.44828	3.2967	12.0338	7.17401	3.0427	5.33822	4.04686	6.37185	7.82113	4.10747	4.04984	3.75927	5.35541	1.95339	4.65467	7.14614	13.3415	5.23434	8.71336	6.33833	8.32958	9.26641	5.85104	2.98836	11.5274	8.71019	9.05198	5.8733	7.05171	10.3083	7.63814	8.29201	7.53284	7.29522	3.61763	8.94886	8.43527	6.94058	8.65014	3.34553	9.43793	7.40316	9.88169
ADPRHL1	1.49949	1.00657	0.684455	0.224072	0.378395	0.602814	1.17091	0.839577	0.81718	0.27003	0.00495364	2.78955	0.046251	1.87495	0.521953	1.26005	0.815638	0.334143	0.510579	1.09946	2.48652	0.769938	0.0712277	1.00192	0.718526	0.89758	0.65449	0.945433	1.27256	1.31961	0.885014	0.510819	0.280003	0.433161	4.78896	1.46503	0.647669	1.44553	1.4896	0.44502	1.72284	1.07278	1.06687
ADPRM	16.4167	9.5958	10.4978	8.18341	13.4208	15.0363	9.9732	8.72014	8.87649	10.5839	9.70613	8.0738	9.54749	11.6786	11.405	10.3683	8.03816	7.31911	7.87318	11.0396	12.3395	8.44937	7.67517	10.8065	13.4444	9.23645	9.16072	9.57228	9.1027	9.95664	6.87554	10.7302	16.3782	9.13645	6.76234	14.7844	10.585	9.30203	10.4371	10.3894	9.11467	8.24535	9.19039
ADPRS	28.9039	24.6739	20.0145	22.5681	16.6346	20.5602	21.6637	23.7223	23.5028	26.7963	28.4508	20.6671	21.767	34.4984	18.4946	25.9416	19.6409	19.3014	19.4847	25.528	19.1364	18.6193	21.2635	32.0534	22.9306	22.4432	20.9471	14.571	21.8126	17.2368	19.8027	20.625	19.3605	20.3022	65.6197	19.8248	19.8743	23.7257	20.1457	30.9495	32.4139	16.0766	19.8122
ADRA1A	1.85381	0.292652	8.97561	2.08002	1.22337	0.57421	4.87002	4.12452	2.7385	2.95263	4.98843	0.0814329	0.895831	8.73714	0.90721	3.22384	0.85878	5.63891	1.40768	2.37629	6.7929	1.96562	2.79349	1.72204	3.65153	1.41599	3.77742	1.50951	1.20462	5.05244	0.326692	1.07931	10.6278	2.68191	0.0080752	1.31239	2.51249	0.565185	1.51046	0.310617	3.9133	9.57137	3.80187
ADRA1B	1.104	0.841236	2.25142	3.74492	5.48384	0.348854	1.68308	2.07172	0.913714	2.71407	2.24809	0.799436	7.01676	0.791349	2.22144	1.10589	0.577182	1.11826	0.447544	0.56412	0.812963	1.10265	1.43401	1.29763	0.709922	0.547976	2.08069	0.941238	1.91597	1.43022	0.784443	1.1275	0.827781	0.456536	2.47231	1.88647	0.718947	0.493174	1.12034	0.651073	0.942365	1.3357	0.2631
ADRA1D	2.64326	0.981428	2.29857	2.72211	1.14813	1.66085	2.3664	2.43731	2.21133	1.49449	6.93021	1.26452	1.05259	3.7805	1.29588	2.91901	4.77597	1.15267	3.29498	3.80919	1.08392	7.97978	3.45281	4.80571	2.08328	6.4767	6.31241	4.11759	5.251	5.00552	2.09169	2.7744	5.20605	10.6259	0.658806	1.85088	2.09323	1.42131	3.19278	1.19046	4.31356	2.15189	16.3275
ADRA2A	10.3395	4.87176	9.85407	26.8738	7.91428	17.9529	8.64278	10.5004	18.352	11.0278	6.50066	11.9033	11.6996	16.1943	3.50041	9.4044	6.62663	13.5041	9.99662	15.1901	31.2617	29.5759	18.773	20.568	23.2392	11.564	5.64238	13.9828	5.23681	17.4814	6.86524	17.6352	2.53111	16.3404	4.6843	6.46004	7.69607	17.1997	5.75066	23.4167	26.5718	7.29638	12.4703
ADRA2B	4.80444	2.50602	8.4632	8.51258	3.45644	3.70358	6.58018	9.28181	3.38977	6.09795	4.26699	1.45346	8.29807	6.91032	3.51723	6.47552	1.73135	3.4234	5.49157	2.74295	1.87986	3.43178	2.32077	3.23588	4.07389	4.08955	8.72801	1.9496	2.22818	4.77971	0.986855	6.05162	8.46876	1.71629	1.04102	4.73383	5.34922	2.11742	6.18008	1.43225	3.45506	7.46951	1.68764
ADRA2C	27.7067	52.4845	20.981	4.55328	10.1127	10.8282	72.4949	17.6902	48.9651	8.58862	20.0745	126.691	13.0267	29.03	25.8654	19.0578	31.7199	94.3733	11.3085	17.4539	15.3092	14.9534	22.7352	192.96	14.6133	116.207	57.0401	80.3668	107.218	32.5918	237.826	8.66013	82.5515	52.6724	31.5209	20.7146	57.9525	68.7404	119.175	131.721	40.5801	49.3921	131.825
ADRB1	0.202216	0.578376	0.0472418	0.132066	0.0733646	0.215994	0.0254065	0.101645	0.211944	0.137507	0.0287379	0.566895	0.122114	0.211102	0.269343	0.169447	0.179192	0.395756	0.274664	0.316877	0.118636	0.165488	0.0378301	0.064196	0.185266	0.0588072	0.0529948	0.0337098	0.596146	0.0941911	0.210943	0.0829946	0.144051	0.237448	0.227793	0.284833	0.190377	0.20313	0.149468	0.13029	0.377009	0.0990429	0.109688
ADRB2	7.05891	4.27594	12.3765	7.39078	6.15557	4.53396	7.44065	4.10273	5.61425	4.34589	3.4222	3.67713	5.59817	8.15873	5.89005	7.2426	3.54221	4.86842	6.478	4.64364	6.87562	7.93843	4.35843	10.8287	8.11682	7.27893	21.1939	6.16793	9.18209	4.61036	4.09894	6.42742	9.96817	5.20344	6.2945	8.20405	7.4635	5.71396	10.437	2.54821	7.20316	6.25758	4.64631
ADRB3	1.58599	1.4721	0.153325	2.65612	7.31583	0.863688	0.67076	1.38118	0.15898	1.90674	1.50353	0.595963	7.35234	0.052853	4.25769	0.31888	3.08452	0.412958	0.0305983	0.262792	1.79518	0.17927	0.169901	2.09856	0.0926798	3.79605	0.211684	9.76526e-05	0.482613	0.301182	0.404921	0.0829946	0.311984	0.29222	0.0244856	0.622957	0.845804	1.3633	7.71107	1.09746	0.000105181	0.0990429	0.175436
ADRM1	49.8668	33.1028	51.4333	45.4364	26.8532	42.56	51.4913	55.2875	45.8179	49.285	61.9533	33.4836	32.0717	81.6943	32.2339	53.8489	42.5215	49.8636	49.1895	51.0234	52.5352	51.9748	49.6741	94.8698	45.0326	57.2867	64.0804	34.9115	53.4069	36.976	52.9841	44.7217	47.0699	55.5929	41.4051	53.0165	50.5025	41.3626	42.2224	98.3362	83.2547	43.5719	51.922
ADSL	15.5464	14.5912	15.2735	19.7646	15.0205	18.1148	18.6176	15.2007	15.4652	12.3712	10.5079	14.7057	10.7646	7.40615	19.5857	16.9469	13.092	16.9524	14.3417	19.7139	21.5818	15.7113	21.1904	10.3714	16.4111	20.9584	18.5045	15.7807	14.5192	13.3653	17.333	18.6359	17.7532	13.651	18.083	21.0247	18.7326	17.2675	16.1374	10.234	26.1576	16.5732	20.3326
ADSS1	5.56409	2.90168	4.65413	3.8791	2.33052	8.09581	3.38613	4.82423	4.41393	2.83573	4.61357	5.38228	3.18405	5.34986	3.96758	2.39852	4.10631	4.29325	4.6887	5.2834	4.60264	6.92468	3.35252	4.75967	4.86334	3.22953	7.10484	2.51243	5.30991	2.49448	2.53382	4.75664	2.43964	5.08561	7.75955	5.27749	5.66274	5.94766	4.56999	6.86817	3.50802	4.38043	4.20597
ADSS2	34.655	40.3085	46.2098	35.0223	33.2548	41.62	38.2766	39.5802	35.7574	33.4316	42.6298	41.3022	34.7678	29.0997	34.8766	40.5875	49.9481	43.1019	39.822	37.6353	47.3114	46.5583	44.4266	37.1313	41.0406	36.2058	41.0566	42.6268	42.6057	52.5134	53.8416	39.0729	55.0339	38.866	55.1751	55.739	36.8214	54.813	49.5987	38.1099	39.0511	40.2332	43.6146
ADTRP	0.184785	0.0347781	0.0708159	0.147065	0.241885	0.197375	0.0760225	0.0201999	0.0280793	0.0172673	0.0573748	0.607655	0.183129	0.191567	8.72566e-05	0.119625	0.0591927	0.068213	0.100758	0.000265548	9.22969e-05	0.109248	0.0934799	0.0159785	0.00841515	0.000108817	0.0175526	0.0258952	0.0422424	0.130496	0.000466908	0.0766873	0.0713527	0.000103092	0.201948	0.0177136	9.21566e-05	0.0288112	0.148709	9.46117e-05	0.269567	0.0245939	0.0651924
AEBP1	420.528	389.506	959.62	447.318	397.579	472.12	596.763	700.638	690.237	568.355	562.713	344.713	638.67	568.466	369.385	615.036	608.885	564.622	488.64	560.053	607.621	433.3	846.235	518.331	565.671	577.454	779.711	403.783	424.5	611.734	405.617	629.701	250.041	397.571	89.7808	908.895	991.767	453.976	397.199	708.005	756.886	979.109	389.492
AEBP2	24.133	26.6621	43.4469	37.4037	23.6585	34.1932	27.7872	25.4204	33.0415	21.3914	29.0368	25.3094	26.6169	10.5109	29.4289	33.5928	38.2968	30.2856	29.2118	27.4157	35.885	44.4267	37.207	14.9591	33.7781	33.6204	45.2147	42.5243	36.6794	49.3564	34.7116	35.3938	41.8939	34.258	33.6042	31.4292	31.9879	37.6659	38.1688	27.2726	30.219	36.5948	38.7203
AEN	15.5792	16.6128	11.8225	25.4056	11.4073	13.1035	9.19956	11.4347	21.4769	16.1637	34.6363	22.542	15.2385	37.9271	10.8376	18.4102	17.2331	12.2483	17.2474	21.5489	11.3295	20.0526	14.66	24.9732	17.8847	11.4858	18.267	10.0669	21.3159	18.8175	13.6376	12.4679	15.8099	16.6508	24.6491	12.9556	9.70464	23.2616	16.5049	26.2996	23.1378	12.1688	12.7991
AFAP1	20.31	21.2252	72.102	49.754	26.7122	47.9634	53.3635	29.4161	37.7776	19.5208	46.4772	13.2454	23.3835	18.847	24.2249	48.8183	58.3071	45.6707	47.4419	33.8857	57.2411	72.1315	50.4832	31.2869	42.6962	65.0198	79.2361	65.3186	70.4414	75.1052	84.6565	48.8745	100.107	57.0767	17.1809	65.0547	64.0084	121.174	133.529	62.146	42.1938	59.7532	65.1341
AFAP1-AS1	0.110208	0.107399	0.765127	0.372438	0.125957	0.700268	0.479219	0.0621089	0.392712	0.261299	0.494794	0.652846	0.0931756	0.106196	0.412099	0.233344	0.696063	0.565938	0.498651	0.346631	0.779999	0.998727	0.55787	0.403794	0.36314	0.239073	1.68266	0.638315	0.772782	0.651088	0.788769	0.395233	1.78568	0.521315	0.257001	0.693761	0.712855	2.76016	3.25915	0.510079	0.341628	0.682909	0.493023
AFAP1L1	19.2006	13.528	44.6257	26.5405	15.854	27.1302	39.3875	19.4541	24.7266	21.5035	17.6899	11.418	18.8953	19.9822	18.5425	32.7628	32.2399	37.2676	29.2219	17.1167	25.8074	16.2922	21.6967	22.1788	25.9558	40.2645	31.2748	34.4622	25.2553	26.5486	23.9717	19.1033	53.9461	34.8369	59.3178	47.0667	26.9812	17.9692	20.823	14.3118	28.2209	46.701	39.2824
AFAP1L2	57.0583	49.8952	63.8186	61.347	55.9324	108.271	50.3686	115.417	64.8482	94.9471	55.8787	33.3837	48.4212	66.7031	70.0427	76.2037	104.992	43.479	72.2147	106.516	43.509	93.8507	72.0565	59.1044	117.08	56.8869	65.5359	43.5497	52.829	55.2691	57.1322	89.7694	36.4367	66.6656	88.1578	49.8502	69.5385	62.1568	61.7507	47.3311	78.3956	78.9466	59.206
AFDN	47.0101	73.8838	116.064	68.7168	78.3121	79.2527	55.6795	54.2047	67.2713	59.2389	60.8376	57.8377	56.987	21.3067	79.6769	76.9848	93.3472	68.8604	68.7938	58.6325	77.6121	81.9969	80.9075	22.3608	59.6659	66.1091	78.9834	76.4796	75.7258	58.3686	73.2882	64.7628	87.4153	60.7637	164.788	89.1373	83.9339	86.9264	86.47	48.0974	57.4979	71.9613	75.0366
AFDN-DT	1.11143	4.16866	0.624807	1.38454	1.61224	1.18689	0.904258	1.02254	1.63534	1.33823	0.716021	2.74293	1.62578	0.615517	3.89471	0.730684	0.736378	1.1963	1.19498	0.811364	1.44793	0.67027	1.24534	0.320494	1.11793	1.0457	0.786592	1.07471	1.11216	0.550619	0.623756	1.22599	0.827781	1.14889	10.0387	1.38897	1.09571	1.37639	0.694213	0.987504	0.675548	0.727773	1.09591
AFF1	116.142	114.193	65.4646	77.606	99.2273	67.2181	123.028	128.703	70.698	121.853	77.669	67.7945	105.762	91.0394	83.8299	92.9948	77.2681	76.7399	95.3124	105.453	106.802	82.4222	71.956	105.95	98.237	80.564	103.771	72.0513	46.5224	86.5952	36.5676	97.6926	100.673	79.0342	27.5335	84.6477	92.9773	59.151	114.174	117.587	84.7724	67.0972	94.5945
AFF1-AS1	2.95422	3.25955	4.01948	4.28933	3.7862	4.8495	4.07469	3.04661	2.86013	3.36679	3.25038	2.95044	3.32538	2.72551	3.92112	3.41712	3.52231	4.43835	4.22039	3.99462	3.1669	5.52661	3.24526	3.70042	4.19734	5.67446	3.42073	5.04192	3.47705	4.36573	3.87966	5.02922	7.66508	4.4914	3.375	4.46689	3.86923	4.35075	6.23609	1.32065	3.74821	4.05634	4.18607
AFF2	0.027571	0.898432	0.534248	0.0584126	0.000568161	0.149949	0.130061	0.079286	0.602179	0.142234	0.293203	0.344101	0.0892983	0.118682	0.643763	0.177669	0.135081	0.78371	0.450096	0.161852	0.0560358	0.144371	0.58977	0.593476	0.319157	0.745686	0.336232	0.184716	0.128254	0.534182	0.260406	0.365148	0.106943	1.19482	0.0255803	0.000859527	0.630279	0.299342	0.25602	0.38083	0.714489	0.626233	0.474907
AFF3	10.9307	10.4553	10.6186	19.6473	13.5753	53.3121	20.2279	17.6427	21.5831	16.9032	34.2149	13.4605	9.98162	18.3763	17.2899	12.0742	43.4381	19.0628	29.3953	31.0913	10.896	43.2734	24.5506	26.033	25.1077	24.5466	29.567	21.9703	33.0429	33.2191	12.0353	29.6573	25.2546	47.7396	3.44074	30.3207	27.7915	13.851	20.6657	10.4426	19.5384	38.6526	30.999
AFF4	96.9422	148.674	185.069	117.228	129.619	164.797	132.842	132.28	123.207	97.1879	147.007	110.006	109.292	69.8935	131.01	142.4	178.678	142.248	126.091	103.966	206.757	187.846	142.354	108.542	138.401	124.014	189.634	208.059	201.933	207.424	171.721	134.283	295.707	145.785	103.524	194.048	178.044	236.937	248.936	153.891	94.8124	186.809	158.782
AFG1L	2.40569	1.70932	3.88287	2.70771	3.14059	3.12294	3.21225	2.70524	3.03716	2.54174	2.98849	3.2039	2.63208	2.71886	2.83053	2.47364	3.97153	3.84248	3.59038	2.41688	2.83364	2.66174	2.77007	3.56248	3.56549	3.99773	2.99802	3.7098	2.47338	4.1639	3.5559	2.7068	5.47148	3.81644	5.53362	2.98417	2.72254	2.37657	4.04623	0.998641	2.77342	3.70956	3.83548
AFG3L1P	19.6959	18.4371	18.0549	17.0081	15.6049	15.9152	15.4049	27.907	17.1803	21.612	24.9284	19.4635	19.8436	25.0191	15.9197	23.5508	21.6378	17.2304	19.8194	17.6114	17.7829	19.7389	20.9214	22.7962	18.513	18.972	19.2591	13.1126	16.7375	15.3045	15.7965	12.386	11.6338	17.9105	15.1621	15.4138	20.4683	22.0007	15.2141	25.5523	28.1546	17.8761	23.2286
AFG3L2	41.3893	44.5753	41.9343	41.0059	38.8308	42.0354	41.2081	46.0438	38.9153	37.0421	54.6361	37.7644	34.2597	39.1797	36.1824	36.9384	50.432	47.6679	42.2535	46.3652	37.9336	45.2087	43.3839	51.0427	41.548	43.719	44.3075	41.3111	44.1444	39.5649	43.5455	41.8125	51.7609	48.9139	52.0576	42.4359	41.5377	43.0355	48.9218	48.2331	46.5244	38.9664	43.0488
AFMID	15.5715	17.6106	7.88674	9.44884	16.979	12.2419	9.81082	12.0406	9.39386	19.9031	13.2054	15.9583	16.2399	12.7831	16.7281	12.1537	6.70866	5.26152	10.3305	9.78841	4.84064	7.84128	9.93914	9.56123	8.30736	7.51712	9.19734	8.57851	12.5376	6.62766	5.69794	9.7483	5.98028	8.60863	17.815	7.95328	7.00566	5.36387	5.76764	6.62509	8.80592	9.12118	6.44907
AFP	0.103543	8.38274e-05	9.35396e-05	8.98604e-05	8.4978e-05	0.300026	0.264712	0.115926	0.0378464	0.0653988	0.31313	0.027706	0.0290827	0.133809	0.0800663	0.161067	0.718862	0.130908	0.106419	0.315891	0.0483829	0.458603	0.304969	1.03549	0.748138	0.148896	0.134176	0.0639958	0.148481	0.536693	0.465056	0.19446	0.136928	0.104227	8.86552e-05	0.10159	0.0603822	0.110377	0.745469	0.194565	0.139427	0.0471291	0.0417712
AFTPH	15.7178	26.1661	28.9559	19.6493	24.5868	19.9015	16.6248	21.1539	19.4146	20.6593	19.571	18.058	24.0455	15.4012	16.8781	19.5895	23.0318	22.7006	19.3677	19.2837	25.7887	23.8428	29.3711	13.8267	24.2943	18.9336	20.6981	21.3325	22.6528	28.63	19.0664	23.3523	23.5553	24.1197	20.0126	24.2321	21.6801	21.0043	28.7724	18.7344	20.4621	14.628	17.3993
AGA	13.373	9.91947	12.3056	11.1525	15.204	11.8863	9.47382	9.56385	11.5273	8.03826	11.0422	13.1323	7.7235	11.1481	9.60081	7.26856	12.7983	10.1017	9.13445	12.9072	9.09932	9.42042	11.8902	14.6972	9.46171	8.67163	10.919	15.5394	8.38147	16.0984	12.7131	11.8346	16.3518	6.19107	13.4587	9.41518	8.4058	11.5892	7.06127	10.4615	6.71296	13.7083	14.1205
AGAP1	14.7352	15.6755	21.4513	18.2121	15.5978	18.059	20.8465	9.09734	25.1395	15.1704	17.645	12.8587	10.9369	12.5801	19.8685	15.9292	27.1673	26.2056	18.449	13.9079	20.0094	18.6837	19.0725	11.5876	12.2314	19.7767	26.5318	37.2085	25.8217	20.4761	31.3049	19.335	32.5472	18.7169	39.6913	40.0271	26.4593	24.693	17.0354	13.8971	19.997	30.3119	26.3657
AGAP10P	0.59406	1.6254	1.85641	1.66755	5.77898	2.14526	1.50009	2.25646	1.58858	1.65836	1.72235	1.11253	1.74585	0.420175	2.83838	1.60542	1.72776	3.51017	1.76625	1.41654	0.794899	2.28116	0.803257	0.814976	5.10935	2.48166	0.706025	2.03645	1.45011	1.24714	1.15951	1.45054	2.23434	1.87136	1.46645	2.06106	2.67594	2.00941	0.824235	1.36996	2.21767	2.0796	2.16243
AGAP11	42.7176	28.2462	81.7672	76.6335	72.2413	29.6897	76.3304	56.4674	77.5973	64.1205	33.7334	22.2408	84.4952	46.5168	48.5701	77.3514	32.4669	44.351	58.8119	38.8674	42.4321	43.3953	75.3768	26.2189	53.2403	34.1159	47.7842	51.6027	34.8178	67.4042	11.231	47.168	43.1733	26.4597	15.1385	51.4905	51.8454	27.2107	36.1786	44.0769	56.4166	33.8192	25.0958
AGAP12P	1.21483	2.83538	14.3639	2.3694	2.10664	0.532567	2.06156	0.968012	1.64934	4.38838	6.15404	1.64426	4.4593	1.08278	7.33067	2.56909	0.439512	2.16784	0.555454	0.838604	0.668755	1.80776	0.798323	3.19981	2.33502	0.673365	0.167817	2.25382	0.846786	0.818759	1.98582	0.127555	0.0404704	0.205736	5.66011	0.772854	2.75551	4.88703	0.234193	0.330369	1.25459	1.81175	0.567771
AGAP13P	3.43731	4.38954	5.99049	3.87241	5.26836	4.13223	3.56892	4.96008	6.63009	0.522706	3.72125	7.78907	3.87508	3.28071	3.75329	3.19245	3.35122	3.21176	1.94284	3.70439	5.47943	3.0632	4.4064	0.169218	2.21554	2.80659	4.03082	3.73008	2.62925	2.2927	3.17748	3.18169	2.22405	2.90596	6.16562	4.50855	4.79791	2.44985	3.26705	1.56728	3.79084	4.50093	2.84506
AGAP14P	0.787367	1.12326	1.95002	1.15337	1.35213	0.867563	0.923721	0.282811	1.47389	0.71996	0.555765	1.84724	2.14246	0.375384	3.10881	1.31488	0.943802	0.794991	0.704601	0.841297	1.6261	0.814492	1.86564	0.273152	1.63033	0.208454	1.08873	1.57313	1.0685	1.47754	1.48372	0.190112	2.23489	0.800982	1.07875	1.00247	2.53072	2.57513	1.06621	0.930629	0.069043	0.360161	0.371066
AGAP1-IT1	0.046736	0.0701798	9.35396e-05	8.98604e-05	0.0611513	0.0333109	0.0254065	0.040715	0.0398119	0.0344443	0.0144195	0.101813	0.0153385	0.052853	0.0337442	0.0100517	9.66493e-05	9.72975e-05	9.00623e-05	0.00782255	0.0170271	0.165488	0.0566974	0.0161402	9.35412e-05	0.0196738	0.0353627	0.0505159	0.0284804	0.00010431	0.0760017	0.0332561	0.0121027	0.000103092	0.0570148	0.0178932	9.21523e-05	0.0291039	0.000102874	0.186089	0.0629225	0.0495767	0.0220239
AGAP2	2.6081	0.95371	1.73843	2.18939	1.99331	2.65513	2.0296	3.72482	2.91334	2.94884	2.16217	7.55956	2.72881	6.73386	1.42976	3.16158	0.788034	1.87098	2.64158	2.65958	2.48807	1.27069	2.47351	3.02629	3.05273	2.38897	1.86516	0.743615	2.48787	2.17246	5.30894	2.21896	1.51311	2.22834	3.10992	0.855058	1.64688	2.79795	1.19655	1.66534	2.88783	1.72404	2.13261
AGAP2-AS1	9.64996	4.81024	8.76314	8.24358	4.32564	10.2251	7.15285	7.37549	11.105	11.4438	6.0754	5.54613	6.45632	17.3236	7.24781	10.3281	5.82258	7.53834	9.77583	11.1426	10.6437	9.98647	9.87362	14.7518	9.56576	8.27725	9.86018	5.83349	9.5666	5.55832	10.9495	9.43711	6.21753	11.5792	4.82205	10.6578	8.25391	6.33813	6.54885	7.05326	11.1242	7.89255	12.2688
AGAP3	40.905	42.8866	32.9989	36.5897	30.3069	35.5277	34.9112	35.8168	41.6975	37.7467	26.9115	28.226	39.0348	34.247	39.929	27.78	19.5632	33.2437	29.0286	37.3326	38.2044	33.1869	34.6509	34.5765	38.0657	26.7149	31.0625	25.5089	26.7091	19.8227	28.9157	32.9221	20.6332	34.4171	44.9458	30.4602	34.0671	34.268	30.1623	53.9811	50.4105	31.6267	36.4769
AGAP4	14.5179	14.3172	6.99248	12.0339	3.42086	5.92949	12.1084	13.5307	6.19444	13.3423	10.8761	13.6175	17.6247	17.3944	11.8903	15.4414	9.65352	8.61188	2.74405	4.77473	9.47349	0.341438	10.0691	16.8323	6.45875	15.6129	2.85673	4.53107	2.02813	8.33868	5.24319	10.8496	3.01617	10.2743	9.82167	7.84039	8.97077	12.0267	5.50685	9.58314	1.56279	9.04606	9.79273
AGAP5	9.87673	14.4947	14.7428	12.2852	18.1705	14.359	10.9782	11.7037	12.925	8.19262	9.10826	15.6647	11.7759	4.7816	17.8973	10.1595	20.4044	13.4148	13.4601	10.7168	13.6994	10.0114	10.9253	5.75452	12.0896	11.6396	13.2946	16.1455	10.3307	10.2837	13.7572	13.2372	15.181	13.3506	14.4211	14.8158	16.7402	12.585	12.1825	9.31961	8.33139	13.844	16.1745
AGAP6	22.7147	29.9896	24.7361	26.4302	20.6182	24.8048	19.4748	31.1908	30.3637	30.0067	25.1885	24.4261	27.6833	28.6936	22.8762	26.6633	30.5125	28.3379	25.5001	29.5305	24.8792	20.0345	18.5999	26.1346	24.5516	22.7661	33.873	17.6529	18.3364	17.1774	21.7588	23.5921	18.1648	24.3209	17.8704	27.782	26.2512	24.5304	19.5072	37.4121	31.8347	23.4544	25.5138
AGAP7P	21.2507	12.7453	12.5529	10.1132	22.708	11.0694	10.3711	11.5474	9.21319	7.23285	11.2499	11.0452	10.2757	11.3164	9.89833	8.75606	7.9007	9.71659	7.54243	19.6178	6.18664	6.48882	7.48	7.59257	8.8781	11.057	7.90482	9.44437	12.5266	5.62515	7.36788	7.04024	5.81966	9.59182	9.7152	9.64349	7.8286	5.83834	8.19837	10.8205	21.5958	10.9085	6.41664
AGAP9	13.8418	18.4812	4.06348	17.5222	32.7051	27.9917	15.513	25.5408	26.3957	3.92002	33.2547	32.1009	20.6341	19.7449	5.02588	14.8591	31.367	21.8335	27.2802	25.8779	27.7523	9.82706	27.5654	3.83828	16.2856	34.4768	27.8814	14.2367	15.6881	20.7396	10.1023	22.7331	18.7685	21.9041	27.6705	22.1909	18.4505	2.32476	21.2185	26.6519	22.2941	35.1561	26.5979
AGBL2	1.104	2.80392	0.801613	1.46833	2.47938	1.16262	1.101	1.38118	1.37715	1.16813	1.13125	4.17128	1.99831	0.738599	3.34895	1.08597	1.01497	1.15267	1.05771	1.25949	1.23633	0.923488	0.886857	0.624848	0.941387	0.626243	1.23435	1.05888	1.23477	0.978607	1.01216	0.900918	0.839776	1.29637	67.0266	1.17463	1.56466	2.29144	1.04566	0.502278	0.83767	1.06363	1.13974
AGBL3	3.12049	2.15551	3.80647	2.25432	4.50969	3.3851	2.16729	2.60681	3.81912	3.04358	1.39453	2.88263	1.92907	0.318749	5.22134	3.29909	3.63705	2.0539	2.42457	1.87406	3.59656	1.89312	2.5643	0.365426	2.5789	1.521	1.58993	3.02535	1.42425	1.10237	1.13799	2.42489	2.73384	2.34177	1.87593	3.4101	5.07663	2.99368	1.95	1.69809	2.13087	1.89789	2.0511
AGBL4	0.0218828	0.0202918	0.0397412	0.0370836	0.0445897	0.019694	0.0284744	0.0797972	0.0149351	0.0936458	0.0402364	0.0732679	0.0715547	0.0296754	0.116742	0.0224291	0.0852719	0.0193852	0.0285954	0.043411	0.0570552	0.0426005	0.0371157	0.018082	0.0217206	0.0275303	0.0149255	0.00951931	0.0199871	0.0370265	0.0190095	0.0264319	0.0377121	0.0256912	1.38047	0.0300271	0.0356508	0.193712	0.0315037	0.0574432	0.0411906	0.0347745	0.0246806
AGBL5	8.0332	7.81753	13.7293	16.7095	8.26738	17.4005	17.4224	13.7148	10.1638	12.1344	13.9003	12.2512	7.01909	9.44702	12.8247	12.0652	16.5642	20.8314	18.0396	17.0721	14.1276	22.8448	16.3861	20.8475	13.5932	23.5471	15.198	14.0573	17.1082	15.7545	16.3757	18.6424	18.9502	15.2752	19.8846	11.7275	13.3645	10.6114	17.3748	8.46861	19.5585	19.8132	19.1346
AGBL5-AS1	0.0156399	0.0701798	0.0708159	0.132066	0.110004	0.066526	0.0127525	9.47635e-05	8.90469e-05	0.12033	0.0430564	0.0291442	0.167875	0.158352	0.0337442	0.0299761	0.0398956	0.0517049	0.0305983	0.0541807	0.0339619	0.124143	9.55554e-05	0.0481774	0.0309556	0.0588072	0.0353627	0.067322	0.0710553	0.00010431	0.0422663	0.0166766	0.000107459	0.0366177	0.0163533	0.0712812	0.0423778	9.95428e-05	0.0374441	0.0372934	0.0419834	0.0248436	0.0439399
AGER	14.0072	11.5245	8.12678	11.7992	12.6532	10.8604	13.6381	11.4224	13.4286	12.9128	11.5844	12.521	13.3601	13.7102	16.3278	10.4611	12.4336	15.8322	11.665	12.5471	11.9323	10.6795	11.6692	25.2167	12.3448	13.7661	19.242	9.75183	8.17394	7.75938	9.40236	15.6936	8.07225	12.3487	12.6415	6.83957	9.04427	11.702	10.7819	21.7093	15.062	8.48959	10.9147
AGFG1	33.4683	37.9786	41.4494	39.2655	31.1124	44.3696	41.4797	38.9754	39.2381	30.2241	48.0493	37.9547	32.2506	29.2498	32.155	38.87	45.7253	43.848	41.4006	35.9907	49.6095	49.3914	42.8956	38.4924	39.3262	44.1461	43.9268	54.9689	59.8537	58.5684	56.8943	40.7756	60.4186	44.6017	40.2175	51.929	45.7795	51.4229	48.1988	33.7621	31.3536	46.5877	44.8545
AGFG2	44.2965	28.4591	51.1323	33.7861	26.283	36.0551	50.8059	42.1029	31.1693	44.7635	33.2761	26.6551	30.6599	46.8946	33.5224	42.4888	36.3764	38.7918	35.654	28.1549	26.2829	26.7782	32.4329	59.3972	31.7418	54.1413	62.4708	34.671	31.5907	27.0595	30.9017	32.4628	52.8992	51.577	59.8458	95.7425	64.3588	37.5027	26.9605	33.9626	42.4646	52.8547	59.4364
AGGF1	28.3286	34.6801	34.489	33.8191	37.3361	31.4216	32.2425	31.8463	30.441	26.0062	31.9015	31.6547	30.5989	22.788	31.4356	27.5256	39.5802	37.2264	37.8099	29.1285	37.8663	31.7396	34.7913	24.2043	32.4207	36.766	28.4936	41.9985	29.8309	43.2988	40.3728	32.297	43.291	36.2409	36.3597	37.514	33.8074	25.64	33.0098	30.5589	29.4405	29.8777	35.789
AGK	33.1459	43.9327	37.5965	41.5397	39.9546	36.5535	33.4498	40.203	35.4064	38.4096	38.6311	39.503	38.6528	35.5007	39.9409	36.8494	44.8126	35.6782	37.3358	36.4225	37.445	41.2239	32.5061	31.8012	38.6831	36.4956	32.2493	41.2216	32.9578	36.8864	31.6941	33.5882	34.2503	33.6848	37.9148	32.4126	33.831	46.1524	34.5661	36.8871	27.7661	34.4588	37.0465
AGL	7.89552	11.6858	11.7542	12.7281	9.88778	15.4643	10.1485	12.7516	8.72837	6.62104	13.7555	8.28524	9.13215	7.38608	8.44912	8.09347	21.4794	20.0493	14.7814	9.10092	12.586	19.6719	12.8235	10.602	10.3329	9.30471	11.5357	22.6469	14.4936	20.4739	14.492	16.258	26.3614	17.9109	8.7322	11.9151	11.5932	13.7882	17.8555	8.64114	7.33184	14.2094	16.1383
AGMAT	1.05736	0.998952	0.153325	0.462008	0.476402	1.31209	0.455642	0.243816	0.768064	0.171861	1.27444	2.13655	0.411933	0.404518	1.21174	0.159485	1.37316	0.860225	0.50856	0.757279	0.237179	1.43341	0.509512	1.40976	0.463025	0.665376	0.42327	0.739565	1.27734	0.357634	1.07963	0.226684	0.647852	0.346992	0.544954	0.267037	0.296091	0.319148	0.616233	0.372082	0.5864	0.148509	0.876749
AGMO	0.046736	0.0526558	0.0472418	0.115569	0.0855779	0.066526	0.240524	0.467227	0.0398119	0.2921	0.143285	0.130881	0.10686	0.0880195	0.0842295	0.129598	0.0199961	0.0172998	0.406866	0.038728	0.0339619	0.0690154	0.358574	0.064196	0.0309556	0.469709	0.105891	0.268995	0.170397	0.301182	0.059134	0.348267	0.144051	0.054875	0.235926	0.284833	0.0423778	0.261139	0.112127	0.0558928	0.0210443	0.123776	0.328848
AGO1	18.0761	21.8438	25.9388	22.8114	24.7236	26.7332	18.7902	22.7151	22.9402	18.0632	25.9858	25.4942	23.1632	21.8008	26.7329	18.261	33.0723	28.3362	23.2818	24.1749	28.1994	24.7114	24.6983	23.6745	22.0199	22.3299	22.5523	27.5484	17.0092	26.7436	21.0191	27.353	19.5765	26.1125	23.6385	19.7255	23.0655	23.8814	21.458	33.9127	21.0539	22.6585	26.6745
AGO2	32.9135	54.2204	64.5086	55.617	64.6897	54.7045	52.1018	44.7617	49.6234	47.6782	49.5686	37.1621	50.771	32.7389	59.6717	54.8086	62.2682	46.1113	41.7286	34.4979	68.4689	62.4108	66.5469	38.5019	41.2027	50.4946	63.6112	66.5702	63.2931	62.1042	64.9777	48.3927	85.7287	45.7875	45.1695	55.5851	63.3075	89.6316	92.8926	53.4972	37.7198	86.5217	60.7977
AGO3	24.9129	28.7738	43.443	30.7892	33.6196	35.2322	25.7203	31.6293	31.3048	23.539	30.8186	28.5544	32.8076	17.4175	27.341	37.9575	43.1074	31.886	32.3175	26.0787	40.9174	39.536	35.3264	16.2766	32.3606	32.2584	30.5155	47.6546	43.2338	44.7172	46.7773	32.0147	56.8334	33.0348	23.9695	39.1735	33.3909	43.4441	44.7843	25.5687	20.9713	40.9174	33.6614
AGO4	48.3439	59.7334	70.8357	60.4952	69.136	81.2846	67.3638	72.8229	53.7475	63.3252	53.9847	49.1725	58.3426	30.5643	66.8186	76.145	81.138	64.5903	66.6605	68.2311	76.4404	72.8762	86.3815	50.8441	73.1059	66.869	66.03	81.8446	53.5108	82.1134	63.6644	88.8499	84.1092	69.6009	49.2133	87.3675	80.1279	70.845	92.1501	61.965	62.2023	88.0375	78.7013
AGPAT1	80.9477	62.3269	57.1409	68.6375	51.0675	71.2026	74.3714	56.9379	77.1335	60.7893	76.4424	56.9363	58.4467	43.5275	71.0878	61.3818	59.6977	76.2384	69.0046	67.6052	67.7223	67.3487	71.2119	74.2078	60.1238	94.1878	76.8707	55.637	77.3019	51.4818	67.131	60.185	58.492	78.1166	60.3137	63.3797	74.214	62.0183	61.7105	52.0518	83.6043	89.6505	90.1499
AGPAT2	18.6343	17.7688	18.7058	18.8732	14.3864	15.1229	14.5138	21.5782	21.7923	26.3642	20.0844	20.3007	18.1146	37.9192	19.2702	23.1232	15.1573	15.2098	18.4621	20.6409	11.8783	15.1221	20.3004	33.1729	16.0211	21.2972	17.9944	14.219	16.7556	11.8634	15.8202	18.2473	12.8238	22.8977	30.7416	16.4551	16.4161	12.8203	11.8008	17.7556	34.785	16.8482	22.5875
AGPAT3	16.1253	10.513	17.8538	21.0302	9.17237	17.389	14.1603	13.3079	18.2933	14.2032	13.3885	17.9047	13.807	6.61007	17.6876	18.8016	15.1928	19.5993	15.0528	11.7347	14.4342	13.4369	24.8905	9.7762	12.9091	19.2715	18.5967	14.6294	17.7652	19.5724	24.5414	15.7606	19.8559	15.858	41.3732	22.3298	19.5647	23.6249	27.5006	13.431	17.5991	18.7443	18.7784
AGPAT4	40.7515	37.6241	51.981	43.1399	43.6747	54.4895	58.6387	50.1254	38.6769	50.9301	31.9874	28.4427	39.8274	39.9844	48.5502	51.4449	51.0423	51.0745	47.2268	40.2235	57.3244	51.737	53.2246	51.8684	46.463	50.267	44.5918	52.4183	45.7397	44.6537	53.5887	48.3625	65.4942	53.6949	25.0801	56.0219	61.0394	67.0002	75.0747	64.4098	58.6506	67.2247	70.6793
AGPAT4-IT1	2.16127	1.50715	2.1807	1.43534	1.42904	2.22551	1.08834	2.01079	1.40363	1.66627	0.787613	1.35172	1.17462	1.79359	2.54118	1.66378	2.28854	1.63434	1.45432	1.4372	1.54116	1.06131	1.66041	1.90634	2.06785	0.665376	1.67515	1.68071	1.27734	1.22323	2.58928	1.3983	2.37517	1.3694	1.30939	2.2246	1.69152	2.81352	2.4833	1.07886	1.94744	1.68196	1.33699
AGPAT5	23.8508	39.0961	20.9457	25.653	25.1228	30.9067	19.8669	24.3316	22.801	20.7672	32.3597	25.536	22.4229	19.2538	36.2486	20.044	41.59	21.5205	24.2236	24.3227	24.3354	24.449	21.8107	18.0051	20.4617	19.1364	24.8262	26.3856	23.0615	23.6912	31.1715	19.8679	28.3929	21.7628	44.6871	22.8146	21.608	37.0677	26.0643	32.2514	19.4735	18.9457	22.8366
AGPS	37.844	31.333	49.0578	42.4306	33.7453	66.1812	53.1975	44.1949	43.6687	31.5372	59.6076	29.2712	27.1058	34.6215	28.8441	40.078	73.0511	65.5934	65.6436	54.6641	49.9408	74.9043	64.3186	57.9875	56.6475	67.4662	50.7983	88.7698	53.3606	72.2023	60.7827	86.0257	90.9242	69.3414	32.7814	45.1485	47.7194	53.3971	57.5803	46.759	53.8555	66.8537	81.5496
AGR2	0.124476	3.92546	0.0472418	0.0495811	8.4978e-05	0.0499185	0.0380605	9.47635e-05	3.07199	0.0344443	0.801932	32.4105	0.701753	3.65742	2.38973	0.0698248	0.139393	0.843022	1.12889	0.115992	0.338788	0.096579	0.0944319	0.176326	0.185266	0.0588072	0.0882591	1.22694	8.16029	0.150643	8.0291	0.0498356	0.299989	0.000103092	342.598	1.05006	0.338377	24.8858	0.261492	0.520878	0.0210443	0.0990429	0.087772
AGR3	0.0156399	0.455708	9.35396e-05	0.033084	0.0122982	9.58231e-05	9.85261e-05	9.47635e-05	0.264908	9.019e-05	0.114648	5.37758	0.10686	0.6331	0.589083	8.94826e-05	0.0597951	0.0689075	0.132292	9.61919e-05	0.118636	0.000106291	9.55554e-05	0.0321588	9.35412e-05	0.0196738	9.8385e-05	0.100934	0.695487	0.00010431	2.38687	0.0166766	0.0960696	0.0366177	99.8812	0.249241	0.021235	4.11872	0.0561147	0.111691	0.000105181	0.000110453	0.00010788
AGRN	55.4074	33.9892	96.2501	66.2944	29.5411	80.9951	82.1789	46.7329	74.7595	57.6308	54.6554	84.7149	36.8497	76.5065	63.0001	72.3903	76.3995	107.53	99.0987	73.9252	80.4975	88.1932	79.0662	96.2554	72.9303	131.559	96.6494	68.8619	70.346	49.1122	119.062	83.7601	92.4149	85.1347	410.884	81.5938	63.106	75.0767	93.9307	67.5231	96.2292	107.155	92.1158
AGT	1.96946	0.213317	1.84382	2.56145	1.01588	0.954373	5.08589	3.41728	1.86225	2.15999	4.96541	0.450857	1.28795	2.72122	0.603021	4.79784	3.25259	2.04723	4.16165	4.35349	4.41178	5.34903	8.74581	12.4663	2.46297	6.21656	4.35908	3.39186	3.93106	16.9722	0.456485	9.29609	1.6068	3.95598	2.86513	1.16351	6.77733	1.40921	3.92803	1.68491	7.723	7.74528	4.94842
AGTPBP1	5.27532	6.53614	12.3617	6.8843	3.5548	12.9165	7.25807	3.66028	11.0563	5.13357	4.44496	4.87528	4.02742	2.51632	8.68021	8.72041	14.7672	7.72381	8.48097	7.63858	10.6653	8.941	8.5052	3.65346	9.34066	9.53201	10.4162	11.4613	10.6139	15.9427	12.8476	10.2186	16.1392	8.34275	10.8571	12.2348	8.66973	9.07859	12.4785	4.30052	4.60353	10.9843	11.8389
AGTR1	1.42119	0.484664	3.48242	4.23665	3.17208	3.91559	4.98145	3.59357	1.26797	2.53313	3.89594	0.0589524	1.82231	1.3147	1.21813	2.53837	0.75785	2.14563	0.972403	2.76625	3.12861	1.43575	3.51745	2.2329	2.33349	0.824272	2.05239	2.14499	2.11054	6.60325	1.20735	3.3653	4.27994	2.58544	0.0493198	3.30822	2.66204	1.03998	2.35476	0.304265	1.68596	8.29449	1.24164
AGTR2	0.721953	0.0779875	1.74879	14.7314	0.185325	5.87201	16.606	2.33774	8.68146	1.96277	30.8182	0.0190798	0.331162	6.46317	6.24518	1.9075	11.5524	11.3559	36.3824	0.0910169	24.9885	56.6049	34.8961	10.6218	59.2974	30.6052	29.5602	40.4481	20.915	1.28316	0.401385	105.135	16.4109	44.4241	0.21853	5.67188	8.02915	12.6584	25.7402	0.817208	70.0622	40.6613	16.0396
AGTRAP	13.0078	9.08046	10.2195	11.8965	8.80993	10.3173	12.6105	9.93693	11.6662	16.8534	9.46085	10.9657	11.361	18.6037	12.8307	13.0544	8.19449	9.83474	10.0607	9.6617	10.7767	10.5466	9.86252	14.7078	8.17491	11.82	8.77282	6.25502	7.91604	4.87374	11.2571	8.54078	7.1335	8.09512	28.5998	12.2293	9.13889	7.34478	6.90379	10.0148	14.3184	7.81473	11.2112
AHCTF1	37.7794	49.2928	57.2474	44.7509	48.9519	41.6451	39.1245	49.2869	37.7213	38.701	52.232	34.1614	43.0668	34.9213	38.9605	39.9199	51.1729	44.8189	43.2761	43.7489	55.7015	45.869	45.0873	33.1246	43.5132	46.1738	49.8037	58.538	45.0312	52.4341	40.0217	36.0237	59.8956	34.2385	31.178	59.6048	50.3895	46.7582	49.7539	43.0172	34.395	43.8391	39.9326
AHCTF1P1	2.49076	4.68771	7.97078	3.92878	3.06378	4.76394	3.53806	3.74837	3.94155	2.46834	3.60232	3.43555	2.68102	1.1366	4.98889	4.50882	5.50893	5.46205	4.01516	2.19082	5.61125	3.43595	5.15261	1.47394	4.31338	3.63926	5.01865	8.65816	6.63351	4.74419	5.98775	5.32115	9.59734	3.96221	5.53304	8.18429	7.08915	6.15314	5.1047	4.43996	2.02132	4.92114	3.9609
AHCY	79.1214	83.5382	57.7051	68.2341	62.8064	71.2945	57.2255	94.1576	69.0077	66.4677	89.7068	78.4333	61.2061	87.2714	99.9484	50.5038	70.906	58.4597	64.7427	84.6592	57.945	59.3903	58.5314	86.2274	70.245	61.27	68.5038	48.5141	78.7845	45.868	96.6217	74.9497	54.0394	62.2131	201.298	71.2106	66.9434	65.4619	54.9766	57.2418	71.6846	71.8009	65.3998
AHCYL1	62.7846	73.0474	137.824	101.612	82.5122	143.909	101.906	68.7868	94.501	52.9104	82.1417	70.5659	57.6099	13.8256	85.547	103.589	131.602	117.009	103.455	80.486	134.951	176.386	136.397	43.6882	94.5948	117.656	140.583	131.29	143.844	127.842	123.572	130.284	138.636	117.759	191.672	162.07	132.107	172.151	167.417	89.524	87.139	146.045	156.948
AHCYL2	12.7348	19.7349	14.8976	16.4762	20.8398	18.8677	12.3721	18.1913	17.7367	13.4411	17.1717	20.1646	16.7429	11.9709	19.0716	15.3524	20.3559	17.2924	13.7965	14.6231	19.5886	15.7975	19.6301	12.0716	16.0104	15.811	19.2556	24.4629	11.4804	16.8458	10.2208	12.5679	14.7366	15.8495	7.25201	16.3768	18.6761	20.3345	16.8751	22.3485	9.5324	15.5494	23.8545
AHDC1	40.7174	40.2707	52.5714	97.8079	69.7244	46.3323	48.4408	60.803	59.286	54.6923	49.1688	30.1902	55.3145	34.7651	53.325	55.5515	62.15	56.5662	56.808	60.8305	41.9927	59.3641	65.4419	28.8786	28.3823	66.3863	72.9523	43.692	57.4365	33.0545	42.2737	49.3828	28.0767	55.1336	44.3078	52.1774	63.2502	31.0426	25.6296	55.5487	74.2019	58.3166	82.885
AHI1	15.2403	20.3908	18.2887	17.3915	19.7331	17.4057	13.9963	17.5426	12.878	15.1218	13.7093	16.5942	15.1765	14.586	19.908	16.7401	27.2831	17.636	17.6027	13.3023	22.1576	13.6782	9.93874	11.8885	16.5033	15.6131	21.7917	19.6882	14.4272	19.564	15.9448	14.9842	23.6858	16.6883	20.2509	20.2818	14.7523	24.5856	20.5691	19.5975	15.7749	17.6721	17.2102
AHNAK	510.415	597.265	1244	1119.76	1043.01	773.927	1024.35	747.361	802.9	749.766	532.514	302.195	775.414	571.725	667.371	1076.56	865.48	919.595	852.639	707.079	585.2	810.983	1005.45	631.316	793.585	1245.18	873.063	1257.11	780.983	1000.65	907.151	882.684	1485.45	1087.09	740.97	1029.68	942.186	734.725	993.322	311.544	829.301	1032.27	1398.23
AHNAK2	64.7435	74.8296	146.158	200.684	150.307	75.5441	140.744	119.375	142.991	140.899	90.6889	27.2196	98.2967	132.069	47.6985	154.513	126.293	114.926	158.789	124.932	97.909	135.277	113.88	114.922	67.7915	119.558	134.987	191.159	88.8896	148.62	119.687	111.405	172.339	169.468	65.7806	144.713	138.184	112.903	81.6225	132.44	154.234	169.604	226.135
AHR	31.0962	23.5874	85.7038	53.3516	41.745	52.2973	47.8575	34.6085	61.7824	38.5111	32.2308	53.5135	35.8767	35.0962	35.1211	90.1779	54.863	41.1486	60.1521	28.804	55.6648	57.1946	73.6013	33.9115	79.1305	56.274	56.2466	74.7535	105.657	123.404	62.09	52.723	89.0409	37.6467	93.6762	70.2764	33.2789	54.6443	84.6341	28.141	48.3066	42.9368	46.1772
AHRR	0.503675	0.0841838	0.135305	0.0838514	0.18957	0.780192	0.206679	0.381653	0.55212	0.282604	0.318064	0.26903	0.214463	0.0959469	0.4696	0.538783	0.421861	0.312625	0.277128	0.602954	0.221975	0.467178	3.1659	1.18442	0.175554	0.211416	0.161282	1.0369	0.308288	0.203845	0.385619	0.481483	0.238586	0.4647	0.319501	0.183044	1.96959	0.929294	0.638062	3.5441	2.47451	0.223445	1.39028
AHSA1	93.8593	82.126	80.2907	71.5744	63.2518	89.5937	84.329	103.246	76.5749	85.2331	109.55	67.0487	63.988	108.796	77.1779	68.6482	94.624	85.3463	89.4185	86.8016	78.1988	109.262	85.4532	127.629	86.7779	97.0535	80.1275	83.046	106.463	80.2905	87.0886	92.9925	89.3358	92.8755	126.544	88.2795	74.8577	75.1768	72.4168	112.625	105.466	78.1152	83.2686
AHSA2P	84.8941	102.75	91.7943	111.205	118.913	97.6601	76.8556	94.421	109.653	88.487	77.7676	91.36	118.43	66.7802	131.785	115.826	89.5908	113.247	93.8663	67.6989	112.045	89.1353	117.847	69.105	74.9436	82.9063	96.0821	115.061	56.7799	61.2157	67.7544	94.0538	60.231	105.263	75.9772	115.784	140.507	113.808	115.028	126.747	91.2989	109.986	119.915
AHSP	0.00768559	8.38274e-05	9.35396e-05	8.98604e-05	0.00349357	9.58231e-05	9.85261e-05	0.00292893	8.90469e-05	0.00368564	0.000101141	0.00109068	8.48689e-05	0.00623743	0.00243558	0.00217474	0.00148508	0.00129756	0.000799605	0.00117436	0.00481862	0.000106291	0.0053612	0.00235686	0.0011702	0.00420266	0.00132862	9.76526e-05	0.0010873	0.0941857	0.0672546	0.00231053	0.000107459	0.00392465	0.202156	0.00630556	9.21523e-05	9.95428e-05	0.00140557	9.46079e-05	0.000105181	0.0990429	0.00010788
AICDA	0.0520223	0.0586139	0.0482109	0.597618	0.469587	0.104871	0.27659	0.105617	0.38276	0.154337	0.547658	0.151099	0.147265	0.386727	0.0250682	0.0888193	0.0665609	0.223539	0.105761	0.815606	0.27724	0.276292	0.16814	0.748239	0.380389	0.297826	0.621373	0.237101	0.590996	0.482289	0.276146	0.240567	0.506921	0.54892	0.0326179	0.151996	0.0393238	0.107738	0.187182	0.0415092	0.208628	0.558494	0.854106
AIDA	77.1495	66.3635	81.9673	82.073	78.0429	82.4732	97.0942	93.589	79.6576	78.7569	76.7754	53.7025	70.8533	90.9934	69.9223	83.7821	78.623	93.7368	87.2638	81.15	84.2338	87.239	84.6952	123.6	90.3489	99.4187	77.1936	112.634	93.0405	129.445	113.907	93.691	112.78	96.6908	43.4185	93.9807	71.1456	81.0673	85.0821	72.0169	93.8492	116.617	117.448
AIF1	11.5531	6.45557	6.88674	11.1039	9.76938	11.8821	10.9431	9.12651	13.0912	13.4077	9.88981	14.6365	8.1876	24.1258	6.75367	13.6887	6.30596	10.9113	9.05642	14.4948	8.20969	11.2613	12.9106	19.498	15.8857	13.3632	7.64478	9.10738	10.67	13.7916	15.8474	13.6122	8.48436	11.6504	8.48752	8.50639	7.80762	8.06999	10.5576	4.20579	23.7162	17.4505	7.4383
AIF1L	32.7525	25.4804	74.3223	36.502	36.044	38.4665	41.0734	33.8231	30.3968	34.8272	23.6909	23.7154	35.5286	29.8557	36.8105	41.8917	89.6734	33.8726	47.3893	40.7995	29.5675	34.6891	34.3635	28.4836	45.3951	40.4116	49.2189	36.1129	34.889	35.3673	16.784	31.5549	25.9688	24.6083	12.6835	42.7609	27.1399	22.0819	24.0329	16.5071	29.3104	30.4373	17.8828
AIFM1	19.0521	20.5495	21.2969	21.0755	12.9572	23.4831	17.4591	23.7129	24.3103	16.362	28.9584	35.5152	15.8016	26.4015	19.8611	16.5821	24.7366	24.4827	26.5293	24.3613	16.942	26.4993	23.7793	31.1607	22.9925	27.5956	20.8279	21.8189	25.7457	20.1654	21.0023	24.2682	23.8667	26.3521	71.555	21.1298	13.6428	24.4233	22.2129	25.5271	30.8952	17.4598	26.3092
AIFM2	12.2125	11.0395	15.342	8.95617	9.07447	14.3826	14.858	12.3482	14.0574	13.2378	9.21256	8.9167	7.91089	16.1608	8.5195	12.5179	10.8384	14.1705	13.4973	12.5348	12.589	11.398	9.53048	20.2686	11.2162	14.9809	14.7899	12.312	9.82319	8.99106	12.6841	13.9592	15.8581	11.5405	12.3674	15.9224	16.8679	9.10282	8.39272	12.4277	19.5218	13.0301	14.3506
AIFM3	0.347701	0.300002	0.0342167	0.032015	0.0421247	0.888766	0.441153	0.0429802	0.361792	0.443668	0.310877	0.346793	0.029892	0.624122	0.030598	0.407211	0.196094	0.285234	0.451535	0.366006	0.250929	0.0461573	0.358519	0.789469	0.33715	0.359028	0.0175618	0.274975	0.182526	0.00285602	0.392391	0.524368	0.316955	0.35136	0.81015	0.497492	0.235066	0.217847	0.216247	0.0381357	0.0269529	0.378058	0.414015
AIG1	9.79643	8.4062	8.75643	10.3715	12.0408	7.0708	10.2034	11.3061	8.10289	13.0673	10.0549	9.73245	10.3907	12.794	8.63515	6.87539	7.10002	8.54717	7.12501	9.63467	6.23954	7.20368	11.8799	11.5334	9.25205	10.2278	6.29273	8.53577	8.37905	15.2182	5.43508	7.82775	7.25818	5.71107	20.9213	7.09592	6.7385	6.31219	6.95047	7.00156	11.4718	8.95956	6.79541
AIM2	0.000238021	0.000751578	0.152373	0.280502	0.330193	0.365462	0.334984	0.306252	0.124502	0.330201	0.244421	2.0534	0.118816	0.170872	0.521753	0.508142	0.278552	0.361351	0.285131	0.285948	0.0389347	0.0639161	0.188549	0.000731934	0.64402	0.000769764	0.264581	0.184352	0.793689	0.309058	0.0800852	0.171419	0.16804	0.00103068	0.0895441	0.355603	0.396945	0.26084	0.254783	0.000882083	0.191488	0.607499	0.00029346
AIMP1	41.5385	38.2625	30.5152	30.3221	44.3565	35.274	33.2474	47.1811	26.4186	34.5741	38.6794	30.2483	39.6717	48.2918	33.8746	32.5927	36.0118	31.6479	37.586	37.6518	28.7511	33.5994	31.1523	47.9727	37.6338	28.5976	28.0566	31.6509	32.0018	37.1255	24.2431	21.0908	22.1559	26.0697	29.9116	33.6508	35.9643	25.1432	30.3291	37.9233	32.667	27.105	25.4763
AIMP2	5.73721	4.12447	5.46033	5.45671	4.04073	7.00496	6.25824	8.74739	6.17504	5.67226	12.3183	6.0038	3.2847	9.53261	4.1262	5.36998	8.32762	7.60347	7.92168	7.44897	5.20245	8.77638	7.83352	13.1294	5.51757	7.44429	8.5469	7.08253	10.5978	8.90428	11.3776	5.88321	5.79342	8.60614	8.14726	9.10916	6.93522	7.25463	6.20363	15.5412	10.4489	6.37827	11.6412
AIP	77.205	49.4196	58.95	48.3609	47.655	52.7284	57.1521	59.0879	52.198	66.3159	54.1572	48.6744	58.8213	92.1714	50.5343	56.2716	34.6405	46.9265	47.2792	52.8371	57.5692	45.5583	58.1801	84.8331	59.6029	57.0403	54.1421	41.728	43.6865	36.1129	42.0185	57.0497	39.6292	51.6718	33.5949	54.7065	51.4985	46.9179	43.9792	59.6316	83.4861	48.6974	52.4126
AIRE	0.0156399	0.0176078	0.0826029	8.98604e-05	8.4978e-05	0.0167034	9.85261e-05	0.0610251	0.172221	0.0516214	0.0287379	0.755834	8.48689e-05	0.0176866	0.0505726	0.0299761	0.0597951	0.08611	0.0814453	0.0155489	0.16944	0.0414517	0.0189628	0.064196	0.0309556	0.137074	0.0529948	9.76526e-05	0.0994386	0.0565564	0.135038	0.00562356	0.0480885	0.0183604	0.0570148	0.0178932	9.21523e-05	0.0291039	0.0747854	9.46079e-05	0.0629225	0.0990429	0.087772
AJAP1	1.99024	2.96099	1.47332	3.67995	0.970279	2.90319	0.891144	1.4218	2.9351	2.1644	4.94047	4.46093	0.808528	2.08646	3.64511	2.97983	3.39711	1.09501	2.00629	5.55719	4.06444	3.84601	2.26337	4.90125	5.75137	7.86494	7.37576	3.98314	10.303	3.7956	4.47764	7.56061	3.32618	10.5935	1.35354	5.12143	1.60277	4.49975	4.75734	4.09611	1.64102	2.27694	5.01249
AJM1	3.74717	1.85763	13.3313	8.29812	4.28694	10.4462	10.2119	8.00227	9.46737	3.83058	10.5241	1.39532	5.78122	3.886	2.00267	7.27249	4.53718	12.0935	9.3051	9.2331	12.2101	13.6441	14.66	4.8858	8.44088	10.5466	7.47613	8.11743	7.83388	8.18566	7.67488	13.0316	10.1121	13.9852	1.70787	13.4895	9.36635	4.20573	7.87911	6.56568	11.7051	7.8405	8.72269
AJUBA	16.4403	20.7977	39.9494	27.2079	15.2143	45.0371	22.0081	15.8782	25.656	13.6425	19.0677	11.619	14.86	8.25463	22.0862	33.6499	45.0652	26.9175	28.142	21.2833	23.0635	24.8179	39.6422	6.90986	17.2516	33.2858	32.3741	22.8418	28.096	18.8238	22.4439	23.6015	22.3654	40.2982	30.2211	42.6169	36.5678	26.4552	19.8816	35.5631	46.8193	12.5913	25.822
AK1	21.265	16.062	24.8361	21.9811	22.6257	22.4182	30.873	27.3638	25.5819	21.922	32.684	20.5152	25.3346	42.8274	16.3292	22.5501	21.6975	30.5038	29.4977	24.644	21.6206	24.8493	26.1227	48.9795	20.4593	35.9573	25.1441	23.1594	25.6877	22.3464	29.0059	24.0636	18.9507	27.1338	68.4248	19.2649	22.606	16.8851	19.1562	34.0401	47.8636	28.2027	29.8665
AK2	54.6882	76.3635	44.3149	53.8488	64.7646	67.5802	47.1773	47.747	52.8144	46.983	47.4204	53.0398	45.8162	25.1615	65.0382	54.7067	88.4624	43.2026	60.3905	53.0322	42.8093	46.9835	47.8263	26.5112	55.1142	34.1012	55.6391	57.9621	40.9091	43.7969	27.135	52.1286	58.123	51.8647	60.2381	51.2958	61.2937	49.9813	55.6625	38.7194	24.9302	37.2697	52.9913
AK3	45.2603	30.012	83.7881	60.0949	41.1389	82.0784	71.7341	77.0248	58.5072	43.5388	57.0222	31.6599	40.0569	19.2545	51.1139	66.7014	61.9765	72.0231	62.2324	53.149	96.4375	84.4749	70.2288	34.9529	67.7731	82.6948	84.8642	87.7555	68.5119	77.2995	80.115	78.5782	99.3428	58.4527	52.1474	97.1113	84.592	75.0866	82.0817	60.9678	51.0958	76.5366	72.5009
AK4	9.74099	10.125	13.5218	10.6098	7.0302	6.2138	12.7536	10.9076	9.13457	10.2449	13.6812	8.74896	9.78581	11.4888	9.70571	7.54699	17.9758	21.4741	11.6987	17.4826	14.6895	10.7135	12.9753	17.5487	10.4449	16.6955	6.38762	22.9095	18.3083	28.2403	10.97	9.25968	11.7897	11.8929	10.8347	10.4379	8.35419	11.2317	15.2044	14.6397	8.46786	12.4566	10.8563
AK5	1.26622	0.245096	3.31408	1.12132	1.27872	0.696693	2.39109	0.729126	2.22164	1.03002	0.730125	0.557104	1.26604	0.734911	0.504072	2.54352	1.43242	1.73607	2.93607	2.68741	0.938761	1.30535	4.33811	1.82467	2.31769	2.11188	1.92172	1.66377	2.82351	5.81016	0.421753	1.34208	0.586314	2.51753	0.496158	0.391436	1.37704	0.493172	0.968215	2.19261	2.42852	1.08837	0.501002
AK6	19.1476	18.6368	14.704	19.1736	16.4785	14.7511	16.5932	18.4667	14.3556	17.976	22.3061	13.9134	17.112	23.7816	15.6759	15.8967	18.1957	17.5937	16.1135	19.4334	14.5377	19.5625	17.0296	27.5125	16.0479	19.551	16.4446	19.0334	20.1522	21.8025	17.0226	16.8918	19.5301	19.3442	11.8372	17.6925	14.4997	17.11	18.6594	22.1893	18.2328	14.7924	19.0404
AK7	0.431246	0.977535	1.60299	1.24936	0.92261	0.606854	1.43607	1.24893	0.35773	0.913543	0.430422	0.848706	1.22988	0.297619	1.20231	0.963532	1.46862	0.961685	0.999548	0.88622	1.04393	0.718299	0.617419	0.242437	0.887091	0.659341	0.639467	0.745734	1.70789	0.644641	1.31919	0.812739	0.941047	0.889583	45.9723	0.659722	0.740246	1.90317	1.11544	1.00029	0.457299	1.05873	0.683811
AK8	1.11082	0.972863	0.960367	0.558995	0.179921	1.23474	0.751218	1.14694	0.647021	0.0263312	0.96937	1.00507	0.103742	1.29299	1.11275	0.67163	0.570679	0.564819	0.947704	1.05243	1.0755	0.955263	0.340021	0.659738	0.658097	0.558033	1.13576	0.287165	0.506639	0.170706	0.605647	0.769689	0.626847	0.129417	19.173	1.12855	0.751131	1.29052	0.754668	0.876021	0.960447	0.502192	0.916749
AK9	2.92781	2.94853	3.36599	3.15898	3.0385	3.77122	1.55844	3.84613	3.30691	3.20451	1.86973	2.24884	3.42633	2.51847	3.22091	4.23004	3.5316	2.84822	2.3167	2.27815	5.46571	2.83927	1.86058	2.28116	3.2144	1.86699	2.89171	4.29898	2.08143	3.27013	3.77199	2.64195	2.55811	2.04557	3.77578	3.30218	2.3678	3.24494	2.14287	4.8987	1.65712	1.71042	2.21562
AKAP1	26.1056	36.3008	27.7089	33.1096	27.9282	24.4675	24.1934	29.9733	28.8423	29.4612	29.0646	32.6804	34.551	40.0378	56.3639	31.1774	38.5301	31.5206	34.7061	36.1426	37.0962	26.3889	34.3912	30.4595	24.456	21.0358	21.9989	27.1873	21.1908	30.4132	17.0126	25.742	13.2111	21.9256	15.4377	20.3235	22.8717	21.1324	19.1333	24.6578	32.2809	27.8202	27.3592
AKAP10	34.6582	40.3651	38.9403	34.8104	35.8022	40.9577	38.877	33.2161	29.8166	28.2168	35.5609	29.3667	34.2934	17.4772	35.7971	33.7026	36.0285	37.5698	38.3393	31.223	45.9003	42.4103	35.9089	26.4928	34.9271	38.7477	37.1493	47.293	32.561	42.7578	36.4947	35.2568	41.5947	34.9155	34.4458	41.8411	38.8567	31.0316	42.1223	28.3025	29.0969	41.5911	43.7879
AKAP11	61.3838	77.8417	75.6376	70.0137	69.5669	84.1339	63.3966	54.9186	62.8549	49.5216	68.0841	61.9286	61.7774	34.4281	68.189	58.2092	88.1947	79.3554	69.9148	52.9179	95.9188	80.4445	71.6391	48.2963	70.0108	68.6793	71.0929	107.576	66.8285	99.0359	85.8396	83.0856	117.782	69.3414	60.7891	75.2415	78.5245	86.4041	81.0306	64.0378	42.5274	71.825	72.0162
AKAP12	86.4413	71.0062	102.716	81.0352	93.4808	128.929	149.949	100.415	121.189	123.032	120.696	51.5487	86.0901	89.5904	66.6755	122.377	95.0891	151.969	98.3137	107.224	86.374	100.72	123.484	259.562	121.348	166.918	124.863	119.309	139.398	157.911	129.557	95.6124	327.561	125.979	30.7812	119.732	98.2017	160.326	493.943	59.0694	114.624	166.464	127.79
AKAP13	317.629	296.845	609.614	196.014	225.965	333.222	658.043	420.667	262.281	273.73	227.367	211.192	191.819	170.573	209.822	344.138	325.694	498.727	266.818	186.808	546.042	262.591	284.389	518.461	345.784	768.15	758.727	597.615	444.546	422.262	876.427	196.152	1073.93	778.925	95.7954	868.34	942.121	726.754	966.185	413.529	304.016	897.758	1024.39
AKAP14	9.18271e-05	0.0526558	9.35427e-05	0.0330835	8.4978e-05	0.0333109	9.85261e-05	9.47635e-05	0.0662923	9.019e-05	0.0430564	0.0510787	8.48689e-05	0.130549	8.72566e-05	8.94826e-05	0.0398951	9.7299e-05	9.00623e-05	0.0192796	0.118636	0.0276699	9.55634e-05	0.000121554	0.0309552	0.000107019	9.8385e-05	9.76526e-05	0.0710553	0.00010431	0.0834545	0.0222028	0.000107459	0.0366177	21.7268	0.106535	0.102812	0.405897	0.000102874	0.0372934	0.000105181	0.0495759	0.00010788
AKAP17A	23.8391	23.837	21.1157	23.2214	20.411	24.1362	20.4824	21.5432	27.5958	25.3566	20.7748	25.4059	24.581	26.9886	24.9864	22.3568	30.0177	20.1504	25.9789	25.4929	23.8632	37.2385	23.8436	25.803	24.2568	19.3716	31.542	18.7825	27.5391	12.05	22.4418	22.1	22.2265	34.827	29.4587	28.1768	22.385	25.2956	20.6943	32.9712	29.8797	27.8579	20.6339
AKAP3	0.578278	0.0817761	0.461221	0.650983	0.280063	0.121932	0.389193	0.451004	0.241275	0.512921	0.592899	0.433991	0.567323	1.17334	0.597867	0.0830875	0.361196	0.649356	1.07921	0.480393	0.57345	0.214288	0.178118	0.204611	0.753792	1.14425	0.720165	0.0324939	0.252155	0.090764	0.455634	0.327775	0.532729	0.819928	2.39842	0.533471	0.670595	0.756721	0.507879	0.536902	0.476601	0.742229	1.09549
AKAP5	3.17189	4.85423	4.07841	6.51643	5.0808	7.34063	4.68208	4.46832	5.00517	5.56546	4.55335	3.38645	4.33212	4.14975	3.19749	4.01485	12.298	6.24462	7.48477	6.22754	4.18299	7.15287	5.26406	4.06885	4.08932	7.005	4.8842	11.9996	9.74975	5.75822	8.23995	6.64296	7.07731	9.20179	1.08982	4.09317	3.9538	6.52608	9.4101	3.05039	4.20887	6.60385	6.6845
AKAP6	30.8941	46.6665	41.1605	23.03	33.6476	77.6404	45.2508	31.7245	30.9177	27.7754	21.7927	23.3704	23.1704	18.6911	48.8363	37.428	37.9882	25.219	19.2915	30.7974	17.3413	29.7964	44.7532	19.0943	38.84	39.1531	18.7254	25.6966	19.9819	72.1835	33.727	55.2099	46.8056	28.4633	7.53874	38.5996	18.4366	26.017	67.9052	23.7329	29.2939	39.3257	33.707
AKAP7	4.03295	1.36044	0.571879	0.785897	1.00051	3.30299	4.46137	3.17326	1.95285	2.53861	2.92132	2.46457	2.77801	4.25611	1.89073	1.22185	7.65344	5.16352	3.91746	4.47314	2.69005	2.82025	2.75628	19.2098	2.34138	12.5336	1.99692	13.605	6.77541	11.1487	9.73492	1.99713	12.8225	20.3732	2.4914	0.871648	4.63528	10.4216	12.4181	7.14953	6.46503	8.78516	27.5767
AKAP8	54.9002	50.5568	48.5274	52.6093	52.0775	44.608	44.8965	56.8074	44.7148	53.7815	47.2079	44.241	50.7185	46.7188	52.0505	52.7399	48.7937	44.1418	45.7929	47.6022	43.1669	46.7067	51.0738	45.3649	43.6237	45.571	55.9645	42.906	43.5684	40.608	41.9415	39.2272	39.8244	50.226	49.4364	51.4839	53.7451	41.6504	44.3802	52.0412	52.5992	40.0183	48.1277
AKAP8L	39.48	36.591	45.197	39.3258	39.0939	32.1801	32.6929	37.614	39.8675	44.4857	36.1693	37.4061	44.5111	43.1085	39.873	36.0896	38.7855	33.3637	31.2865	40.1858	40.0646	38.2211	34.2535	39.1429	40.8821	36.9102	50.9635	32.3447	41.085	27.6358	37.4053	40.316	35.0579	42.1532	44.8973	38.1524	40.8912	41.5797	30.4652	52.2172	39.3361	46.2135	34.9837
AKAP9	56.6223	86.9913	70.0281	59.7623	82.4056	61.9672	55.0412	76.8916	55.1648	60.8685	58.8813	78.7808	73.8546	44.3642	73.3834	59.3929	79.9665	57.3504	59.1333	53.1695	70.3706	60.7561	61.5717	39.9679	65.531	56.8949	53.6575	69.4666	47.8993	58.5714	57.4415	56.4645	58.3188	56.7522	125.29	62.1359	76.8637	62.1075	62.2992	41.9242	39.1285	55.3086	53.7563
AKIP1	8.12294	5.56125	7.06563	6.71704	6.5895	7.04313	10.9833	8.51976	4.98588	5.52841	6.20446	5.26569	5.25952	9.66507	6.4467	7.38023	5.51448	8.05183	7.41285	7.29323	5.17539	4.96577	7.11429	17.0639	5.55383	9.56153	4.84751	7.34626	7.78046	9.32581	7.47881	4.76796	8.58524	8.23181	6.70316	9.109	7.33363	6.26879	7.72997	6.81735	9.9261	6.48549	8.24774
AKIRIN1	42.8365	35.5269	54.1291	48.111	36.3575	50.8887	57.5103	53.1016	52.8175	39.7371	101.559	41.7076	40.4672	36.7357	30.8713	58.4971	60.9299	64.2662	53.6913	51.4254	52.3218	84.2552	58.854	73.0237	46.2177	80.0772	67.4176	65.3199	92.4238	95.2945	60.6261	48.3646	93.5426	65.8278	63.6077	66.8944	52.1339	71.7007	79.1436	55.1795	49.0462	58.8353	77.7417
AKIRIN2	29.6191	28.056	21.3818	24.4982	26.2464	27.6849	24.0807	25.9361	25.4757	25.9546	30.7131	26.7859	27.6244	30.4191	27.1612	23.5009	25.1531	20.9012	23.2372	23.6737	26.5369	26.8609	24.5464	29.6666	28.2389	26.2391	27.5415	20.5035	30.2992	26.3068	27.8486	24.1565	25.2022	28.4815	32.0007	31.0719	29.0926	18.7079	25.5042	28.6432	23.7451	24.0654	24.6995
AKNA	127.295	90.3701	65.794	62.389	78.2967	82.2446	61.5973	90.0692	71.7072	109.099	63.5032	80.0454	98.3264	128.013	117.362	86.382	68.5866	53.3195	93.132	97.4562	75.5905	111.772	74.2276	77.4873	105.778	83.1512	91.2358	44.5326	32.8423	40.1247	36.604	101.486	22.963	57.7651	65.8157	38.8878	93.3756	38.8528	40.0556	65.3794	70.4748	72.2789	73.7565
AKNAD1	0.17104	0.108032	0.0811061	0.542013	0.0496286	0.218589	0.529713	0.796801	0.446149	0.323514	0.602628	0.200535	0.407163	0.285624	0.35837	0.358561	0.616586	0.550959	0.505244	0.226823	0.335368	0.29835	0.139421	0.0355653	0.432389	0.104028	0.13775	0.272477	0.137248	0.000550368	0.361946	0.216388	0.132865	0.134924	0.0814118	0.0624431	0.156221	0.137305	0.0448572	0.66936	0.000302713	0.0365943	0.23404
AKR1A1	28.9298	26.6917	14.8633	30.1544	21.4828	21.8988	21.689	16.3103	23.4916	31.6033	29.3783	24.1301	16.7626	42.1554	27.2907	20.795	23.8113	21.6728	22.4979	23.1431	15.1485	23.5954	19.9861	33.3375	23.7829	29.1332	18.5894	14.2473	19.162	18.0888	19.2947	24.6693	16.7674	18.6874	25.047	15.2386	13.4325	17.0605	16.3248	20.4523	29.8132	26.364	29.0961
AKR1B1	35.0305	27.9469	26.201	36.741	32.2033	26.8987	33.1257	33.2645	26.4961	36.0065	42.1321	25.4601	30.6225	45.732	25.6478	24.7642	21.3147	25.409	27.2181	33.0583	22.7643	27.6501	33.2781	38.1049	26.5065	25.873	23.1367	19.6476	23.1062	23.8198	20.5998	26.8687	18.5138	27.9929	13.8108	20.8257	23.8026	24.4217	25.2651	30.6713	41.1447	25.8927	27.8608
AKR1B10	9.18271e-05	8.38274e-05	0.0472418	0.264043	8.4978e-05	9.58231e-05	0.0886765	9.47635e-05	0.01333	0.0859755	0.0144195	2.35144	0.152621	0.0352698	8.72566e-05	0.0200139	0.0398956	0.0172998	0.0916147	0.0696334	9.22969e-05	0.0414517	9.55554e-05	0.128271	0.0309556	0.0392405	9.8385e-05	9.76526e-05	0.0284804	0.00010431	0.00853101	0.0553621	0.072079	0.000103092	0.227793	9.72288e-05	9.21523e-05	0.232134	0.0187735	9.46079e-05	0.0629225	0.123776	0.065856
AKR1B15	9.18271e-05	8.38274e-05	9.35396e-05	8.98604e-05	8.4978e-05	9.58231e-05	9.85261e-05	9.47635e-05	8.90469e-05	9.019e-05	0.000101141	0.219914	8.48689e-05	0.000103314	0.0106849	8.94826e-05	9.66493e-05	9.72975e-05	9.00623e-05	9.61919e-05	9.22969e-05	0.0174643	9.55554e-05	0.000121546	9.35412e-05	0.000107019	9.8385e-05	9.76526e-05	9.712e-05	0.00010431	0.00540832	0.0070576	0.000107459	0.000103092	8.86552e-05	0.0113041	9.21523e-05	0.0183648	0.000102874	0.0118074	0.000105181	0.000110453	0.00010788
AKR1C1	5.59175	6.04294	9.8191	8.58569	10.0362	5.20996	6.82436	13.8891	5.14475	9.30432	6.85858	4.98993	10.2575	12.2676	3.74313	7.43551	5.02452	7.49315	10.8103	11.3249	5.11822	20.3949	14.4126	15.7912	8.95398	7.52493	8.27764	13.4725	6.79345	16.3449	2.99117	10.5235	6.12615	7.42352	5.43771	6.55751	3.88718	4.34726	5.25066	8.46766	15.9653	19.4195	9.44834
AKR1C2	6.60023	1.76734	6.81547	6.82398	3.68024	4.22185	7.38575	8.40231	2.27711	4.9546	12.3752	2.19024	3.77444	9.01498	0.932554	5.91863	3.02046	8.47508	9.24715	10.1619	5.43734	10.8624	12.8421	6.96764	6.5442	15.2705	7.02624	11.9354	4.32747	8.69092	1.81997	9.86792	6.30138	10.4497	1.84913	3.32416	6.46879	3.81	5.30897	5.09562	9.60858	14.5263	14.8879
AKR1C3	43.3084	16.5624	22.0499	14.1672	23.3375	67.3118	37.6328	41.3218	16.6371	24.2148	34.9019	18.3501	17.599	64.4793	20.025	20.6091	35.445	41.3677	59.5083	44.0795	47.9013	59.3138	53.9179	49.0323	36.098	35.3616	30.5659	38.5471	40.433	30.6975	17.9149	49.3115	48.605	44.0544	24.6153	41.923	30.974	39.2509	35.0197	35.0885	59.4752	34.9604	31.4794
AKR1C4	9.18271e-05	8.38274e-05	0.0472667	8.98604e-05	8.4978e-05	0.0167074	9.85261e-05	9.47635e-05	8.90469e-05	0.0172673	0.000101141	0.0146104	8.48689e-05	0.0176912	0.0337707	8.94826e-05	9.66493e-05	9.72975e-05	0.0102783	9.61919e-05	9.22969e-05	0.000106291	9.55554e-05	0.000121546	9.35412e-05	0.000107019	9.8385e-05	9.76526e-05	9.712e-05	0.00010431	9.71798e-05	0.0166856	0.000107459	0.000103092	0.122388	9.72288e-05	9.21523e-05	9.95428e-05	0.000102874	9.46079e-05	0.000105181	0.000110453	0.00010788
AKR1C8P	9.18271e-05	8.38274e-05	0.0236676	8.98604e-05	0.0122982	0.0333109	9.85261e-05	9.47635e-05	8.90469e-05	0.0172673	0.000101141	0.043678	8.48689e-05	0.0176866	8.72566e-05	8.94826e-05	9.66493e-05	9.72975e-05	0.0509371	9.61919e-05	9.22969e-05	0.000106291	9.55554e-05	0.000121546	9.35412e-05	0.000107019	9.8385e-05	9.76526e-05	0.0142888	0.00010431	0.0169648	0.0111501	0.0121027	0.000103092	0.0895441	0.0178932	9.21523e-05	0.0291039	0.000102874	9.46079e-05	0.000105181	0.0248436	0.00010788
AKR1E2	0.402222	0.557272	1.17982	0.806279	0.862865	1.09055	1.3633	0.779209	0.17366	1.24008	0.749077	0.647059	0.691179	1.04678	0.923228	1.08951	0.928649	1.44645	0.59734	0.50335	0.500858	0.608043	1.06512	1.03177	0.740618	1.00372	1.6024	2.00073	1.33736	1.21146	0.806586	0.539964	1.41837	0.992186	0.390506	1.0594	0.93994	1.51962	1.34923	1.30453	0.996245	1.92782	0.738959
AKR7A2	44.035	34.404	29.2829	39.5057	34.0573	33.607	39.0416	39.7783	34.3051	43.9921	47.0971	31.6395	37.2309	61.3551	35.256	29.2332	24.6174	33.0027	38.9765	44.5272	24.5466	32.2075	35.4805	56.4471	32.5564	36.9344	36.9531	25.1736	31.1544	26.5904	26.4718	41.0382	29.5437	41.2375	53.4629	27.9264	32.9585	27.5112	28.1482	34.9564	43.3247	32.4019	36.5607
AKR7A2P1	0.202216	0.140276	1.56777	0.0825752	0.0611513	1.06298	0.506258	0.0813351	0.145739	0.171861	0.0287379	0.145415	0.167875	0.052853	0.168372	0.378653	0.497584	0.240933	0.264495	0.100539	0.914571	0.137924	0.0566974	0.0161402	0.123542	0.0979407	0.388006	1.61348	0.255547	0.131826	0.969988	0.226684	1.66745	0.310477	0.00822097	0.836509	0.951518	0.6672	1.90451	0.353483	0.0838616	0.692637	0.306932
AKR7A3	1.88199	1.26181	1.07539	1.43519	1.39545	1.20449	0.765082	1.76707	1.55816	1.27586	0.493326	1.51245	1.8604	1.73109	1.19704	0.933463	0.851753	0.992772	1.34744	1.47101	1.10955	0.87658	0.841905	1.21283	0.895094	0.754253	1.26266	0.714845	0.928232	0.63057	0.586161	0.800876	0.511834	1.07957	1.31921	0.921887	1.49161	1.02015	0.637347	2.32062	0.961144	0.945674	0.763394
AKR7L	0.367535	0.68049	0.590148	0.644101	0.720346	0.123128	0.337572	0.751335	0.742614	0.823811	0.712588	0.638871	0.922456	0.361512	0.433505	0.471722	0.132379	0.404311	0.486114	0.281177	0.452791	0.75745	0.337561	0.200491	0.307605	0.244254	0.633595	0.405184	0.385703	0.548332	0.177519	0.434306	0.182082	0.546484	0.59657	0.229528	0.463302	0.260197	0.00643477	1.37325	0.277296	0.176944	0.178264
AKT1	66.8027	52.2491	87.0711	85.4978	51.6047	83.0057	91.3938	84.2014	83.5958	64.8294	103.071	58.6528	63.1663	97.9217	66.8229	77.6822	87.9049	106.337	95.743	93.8681	86.0781	99.0117	84.0066	139.852	90.0208	122.549	101.639	91.9615	110.194	88.7785	116.139	98.6566	119.97	119.021	78.367	93.1775	76.7888	68.068	75.709	109.206	103.131	82.7029	100.336
AKT1S1	14.4859	13.5321	15.6821	12.215	7.33763	18.1804	18.1939	22.514	18.5367	21.0142	23.0785	13.7903	18.8127	40.2503	18.9903	17.091	14.5083	16.3922	21.196	21.3121	19.7812	16.0879	18.7856	38.9721	14.7734	22.1857	23.8827	10.9892	18.1721	15.7335	14.4173	18.7187	11.0629	17.0263	19.2948	16.3365	18.0403	8.15787	8.86	24.3035	19.1688	9.77429	15.8978
AKT2	120.974	162.779	130.196	164.682	148.483	132.574	132.52	127.285	121.875	128.878	145.958	127.537	156.722	56.2529	170.576	121.855	109.177	145.274	121.766	116.646	143.644	135.513	144.412	90.117	118.572	137.66	145.728	118.692	105.465	94.3864	114.321	122.345	101.113	112.458	150.505	113.491	143.813	136.739	119.597	105.493	124.084	144.391	153.527
AKT3	81.7962	115.442	130.376	83.3761	107.365	99.2189	153.375	97.4777	89.5453	100.802	85.2496	62.3519	103.763	67.5001	106.145	107.575	95.3813	125.09	84.4656	82.7845	152.769	102.927	125.387	136.14	102.488	134.604	114.237	139.126	98.3159	158.005	130.161	109.485	221.638	112.237	36.2459	180.923	135.076	162.618	242.062	105.323	100.82	159.131	137.71
AKTIP	24.1174	24.0948	23.265	26.3206	29.422	20.3949	24.2726	20.7561	19.5535	21.6093	15.8679	15.3166	30.0305	23.3602	24.582	21.2609	16.2894	21.1154	16.7204	20.4248	18.6114	20.6286	25.0479	22.7429	16.8701	24.2776	19.5563	25.0315	20.0356	28.9048	20.5763	23.7968	21.1457	14.6691	12.4251	23.6293	23.8164	16.9234	17.871	17.3237	25.5788	22.92	21.6826
ALAD	43.5799	40.6855	39.3742	57.0025	47.3373	43.9454	48.689	47.2062	44.1742	46.3244	42.8687	40.2856	45.9191	48.3292	39.8263	38.9675	34.2805	54.6614	45.5094	46.1342	38.3908	46.2369	32.6381	65.6399	35.3173	60.4825	43.2386	59.4951	46.6284	41.5034	47.0944	39.7847	35.5649	45.059	26.6594	48.6581	52.8183	30.8692	34.8859	28.2504	35.8493	51.6033	55.3173
ALAS1	17.6556	13.318	15.7834	19.6341	16.1279	16.657	16.4639	17.2121	14.9396	13.4046	25.8033	18.6267	17.6141	15.533	12.7907	16.1648	18.2359	22.0411	21.8556	17.6453	16.2527	24.6297	16.6498	25.5142	15.1185	21.6588	19.4032	17.6687	28.0006	17.9672	19.1161	19.3582	20.8112	20.4608	18.5184	19.4505	15.9903	13.3741	16.2447	17.1226	23.1224	16.1223	23.0563
ALAS2	0.0109504	8.38274e-05	0.00479753	8.98791e-05	0.0043498	0.16175	0.00388601	0.00414745	0.182697	0.305145	0.00438679	0.00225169	0.00236766	0.00448903	8.72566e-05	0.0126448	0.0796944	0.00352991	0.00170088	0.00626308	0.00685066	0.0025601	0.167609	0.000121546	0.195848	0.0020592	0.0103353	0.440328	0.00576074	0.579946	0.0872751	0.26492	0.136234	0.255046	1.79647	0.373813	9.21523e-05	0.0154137	0.00700333	9.46079e-05	0.00532793	0.00627952	0.00010788
ALB	0.202216	0.350564	0.389066	0.165061	0.28099	0.415285	0.240524	0.223506	0.410558	0.137507	0.329424	1.30812	0.625484	0.299018	0.286171	0.159485	0.338388	0.447364	0.244156	0.47913	0.423462	0.799451	0.188768	0.36855	0.355008	0.293608	0.141156	0.437056	0.255547	0.432904	0.177208	0.226684	0.34797	0.182676	2.32593	0.231445	0.528662	0.406161	0.242821	0.390682	0.5864	0.371107	0.087772
ALCAM	10.4826	29.7338	28.526	36.5535	19.6959	20.9273	17.0882	23.647	39.2035	22.7859	19.8431	35.0589	21.8326	10.784	38.4367	21.0817	45.1327	58.6323	11.4975	26.994	15.3536	18.3687	24.7954	8.29044	17.5161	29.6644	15.2537	30.0052	65.7026	49.233	31.103	35.7151	36.3943	11.7755	187.638	46.1897	14.9555	29.6959	20.0675	8.2335	18.6656	54.5956	7.27559
ALDH16A1	54.699	29.0829	29.1431	30.1942	20.0245	37.8142	34.0172	31.4757	29.1616	40.0395	26.8666	33.0538	25.5196	37.8242	32.2351	30.2146	24.793	32.407	31.8272	25.2025	26.0677	25.1342	23.1063	34.1188	31.1008	28.1372	39.6152	12.3683	22.0344	16.4106	19.867	28.6109	19.6214	29.1742	19.9784	27.1759	31.8298	30.4224	25.6793	32.8011	38.3543	25.7895	28.3257
ALDH18A1	9.75545	16.4205	19.5654	18.4007	12.4597	20.7323	14.9135	12.769	19.0888	9.25169	25.0103	18.1817	8.48747	2.04836	16.0112	14.6667	26.2497	17.7024	16.6414	13.8358	19.3908	27.508	18.1435	6.7598	11.2766	19.3372	22.7756	20.8265	35.7437	23.5109	30.018	16.6259	23.7388	17.2249	36.6255	18.7387	17.4947	24.4475	18.7799	12.6064	13.8099	23.1053	22.7957
ALDH1A1	236.253	205.416	139.394	188.001	249.822	163.933	181.56	205.66	196.509	192.211	175.444	205.043	253.973	182.075	207.36	129.688	38.824	150.23	154.921	163.088	220.61	108.573	188.692	135.646	205.804	134.737	272.223	138.314	205.396	162.507	100.27	175.489	123.575	143.849	165.11	155.59	240.267	192.734	201.288	74.937	183.385	177.683	79.9936
ALDH1A2	37.9334	74.4664	165.91	123.962	98.7641	44.6149	92.406	75.9727	113.147	69.7676	78.6487	81.4935	85.3446	9.79819	61.2743	93.9016	36.6261	112.101	87.2017	49.2128	89.1854	94.9046	108.458	16.7058	45.8529	153.658	112.928	138.816	114.151	60.6817	152.715	95.5527	119.617	93.9191	154.838	54.4667	147.257	151.046	55.8663	69.6121	58.3659	135.275	97.2605
ALDH1A3	10.4607	19.9666	18.0917	17.5969	18.3054	16.7076	22.3051	19.5887	16.2506	13.1219	12.6267	10.7205	19.279	3.36577	14.461	23.8142	11.2628	33.252	8.90857	16.7477	27.0001	17.8629	16.5069	13.3102	16.4666	18.5813	29.5417	33.7011	30.4527	25.9229	68.2205	16.1788	20.3468	13.4894	2.3857	32.8733	19.0647	63.0659	48.6956	24.8774	12.7131	22.6702	66.5564
ALDH1B1	70.8992	21.1866	78.7494	51.273	32.3042	120.073	191.493	86.4196	169.18	78.1557	167.683	37.1921	43.2747	186.312	38.0156	183.175	242.993	143.917	132.304	166.627	105.944	230.06	135.052	336.663	128.865	153.951	112.952	133.054	165.744	384.232	183.385	146.524	127.81	233.584	17.8343	120.906	64.3799	204.568	305.246	96.9773	298.822	195.688	169.323
ALDH1L1	2.23989	5.38051	1.57929	11.8151	11.0028	1.66392	1.38953	1.61034	3.361	1.55767	9.45937	6.09268	5.84126	0.478002	6.02073	1.54173	0.731734	1.08938	1.52417	1.34805	0.578283	0.406355	1.20183	0.151573	1.21096	0.803642	1.71885	0.794738	2.57845	1.36109	1.20413	1.47785	0.476705	0.598766	1.60756	0.34594	1.1867	1.64189	0.733666	0.526957	1.94532	2.72311	0.209506
ALDH1L1-AS2	0.108928	0.50828	0.153325	0.346528	0.574109	0.116349	0.189908	0.101645	0.225185	0.0859755	0.157604	0.407023	0.305158	0.140769	0.471284	0.0897492	9.66493e-05	0.0517049	0.122123	0.146897	0.0339619	0.0690154	0.0755646	0.0161402	0.0618177	0.0783739	0.141156	0.168158	0.0710553	0.0565564	0.151906	0.116154	0.0600838	0.0731323	0.0732795	0.0534852	0.274949	0.0291039	0.149468	0.0744922	0.0629225	0.247441	0.109688
ALDH1L2	1.85359	1.86497	8.21054	15.5686	5.50956	8.07107	8.60182	6.10788	11.7425	5.48716	8.44556	5.6143	3.67644	3.74883	3.99612	7.8735	15.3094	14.1865	12.3746	8.11824	5.61236	21.3887	9.77232	10.9322	8.80032	17.5406	9.31041	23.0754	18.2508	28.2421	16.2393	12.9648	19.3567	17.7076	1.09889	9.98582	7.00881	5.17807	9.156	2.95203	7.24543	30.3913	17.4277
ALDH2	114.969	114.503	160.031	115.73	110.213	120.4	157.841	116.525	117.759	134.749	121.819	112.932	126.656	146.956	112.318	109.692	89.9985	158.398	125.276	133.121	103.923	119.424	150.272	186.444	127.482	175.727	140.366	128.781	97.629	145.512	100.886	149.882	145.487	135.537	82.3996	127.046	127.182	101.051	150.143	87.1786	160.008	133.351	134.479
ALDH3A1	0.00232516	0.485953	0.59947	0.302391	0.060803	0.286078	0.38537	0.21626	0.0405225	0.00399725	0.12679	2.06124	0.306771	0.388919	0.315402	0.37403	0.291972	0.0377342	0.514473	0.317534	0.00100426	0.188858	0.0379825	0.209274	0.00128686	0.00241948	0.0011856	0.00193292	0.0179718	0.00157479	0.0773703	0.117737	0.000708621	0.000759786	2.51805	0.00325308	0.0950331	0.0642188	0.175451	0.000954748	0.103352	0.000713565	0.000302251
ALDH3A2	19.4903	30.2018	39.8349	35.7766	25.3194	37.1152	40.7563	34.2451	35.0522	29.5002	34.4395	25.6719	29.8015	14.9163	25.9726	49.743	36.7984	44.2919	38.194	25.3712	36.1612	45.4318	54.0707	37.8456	23.9603	35.8936	40.509	35.3683	32.1869	30.4064	28.5182	33.1852	45.1418	36.5843	32.7571	36.8246	34.9531	55.8856	73.7365	22.1922	47.1162	48.737	46.0233
ALDH3B1	3.32809	1.58127	8.33915	4.35238	1.99904	2.69158	8.46539	1.37229	7.02779	2.65486	2.68334	3.81398	2.12612	2.24998	2.58148	5.80288	4.03451	11.055	6.33753	4.82223	4.18684	7.36692	3.71039	5.43712	4.05895	9.7537	7.14904	11.8923	4.6246	6.55396	9.32068	4.63854	12.9475	6.08241	127.679	5.85738	6.48928	5.13764	3.95486	0.95756	4.0542	8.02564	6.39906
ALDH3B2	9.18271e-05	0.488028	9.35396e-05	8.98604e-05	8.4978e-05	9.58231e-05	9.85261e-05	9.47635e-05	0.0801825	9.019e-05	0.0963358	7.00979	0.146543	0.084516	0.308389	8.94826e-05	9.66493e-05	0.0331313	0.100002	9.61919e-05	0.0326122	0.000106291	9.55554e-05	0.000121546	0.0445419	0.018894	0.0847458	9.76526e-05	8.06972	0.108509	0.064972	0.0107096	0.0231419	0.000103092	4.70875	0.170965	9.21523e-05	0.405893	0.0180295	0.0715274	0.000105181	0.000110453	0.00010788
ALDH4A1	13.4114	9.78252	17.1916	16.4477	11.2822	10.7314	18.5511	15.8409	20.1002	16.085	26.7832	8.5507	12.2993	18.1021	9.77665	21.7528	18.3749	19.0724	16.3555	16.6632	8.76102	17.2525	19.8615	30.3118	13.6252	28.055	14.1211	18.1017	19.1583	17.0814	14.7475	15.9682	18.6906	24.906	8.72603	12.6796	13.0189	13.8649	17.8195	15.1394	29.8448	32.226	30.2047
ALDH5A1	9.49121	16.2219	11.8683	10.5763	11.1453	14.8929	13.8856	10.4603	11.774	9.86135	8.34575	10.8905	12.5672	3.37784	15.3238	11.1109	10.3235	14.5348	11.8874	12.219	17.3615	12.9642	10.9905	8.64411	8.92142	9.36611	11.784	14.3083	8.2351	10.1917	5.59067	12.9384	11.3858	9.87867	69.9438	12.2689	11.3679	12.5611	9.97326	5.7584	5.75539	12.9729	10.9035
ALDH6A1	23.7031	40.8453	35.6441	31.5199	44.778	21.8816	33.391	26.9102	23.171	24.8722	19.8912	28.0591	33.4089	10.5038	27.392	21.9909	20.0707	29.9272	22.4794	14.3545	29.3173	21.6342	31.3843	13.9455	21.1975	34.7507	25.9872	35.1745	48.7327	27.4666	21.1479	24.3485	35.3835	25.0631	40.103	33.329	33.7185	26.3303	40.2181	13.249	18.3772	36.6061	34.064
ALDH7A1	35.473	32.3231	28.7958	31.7154	32.6879	26.0323	36.6521	33.8467	29.6929	29.1397	40.786	30.2737	39.0723	30.8407	32.664	21.8123	32.8238	33.5192	32.0998	36.2134	29.3734	38.5891	40.8757	55.8997	32.7293	45.3065	34.7263	44.9984	33.4779	36.6186	21.8985	38.7514	31.6244	41.5534	35.9321	23.6417	39.0931	29.6709	33.9788	25.732	39.5327	44.6679	53.1683
ALDH8A1	0.460618	1.06208	0.543559	3.18788	0.603319	1.5749	4.58371	1.39928	1.3897	0.716294	1.48169	1.46615	1.36629	0.258696	0.343984	1.57729	1.42962	1.97254	2.11104	1.76047	2.42252	0.0466818	2.41047	1.46223	1.7067	2.23743	0.448754	2.98499	2.87404	2.50332	2.87246	4.72356	3.52295	2.0864	0.992612	1.56025	3.60479	2.932	0.190271	7.78564	2.52987	2.78437	5.80154
ALDH9A1	65.6552	72.0608	62.5902	66.4527	74.2338	74.3425	60.5937	75.6474	62.4115	51.0146	73.5422	51.4085	59.4627	47.3295	53.6666	46.2646	64.1839	77.5075	71.1688	74.7457	57.6515	82.0872	66.6031	69.476	63.6232	61.7052	63.3917	71.6329	55.5262	75.1923	52.522	75.7309	76.397	67.1742	57.0248	67.251	57.0461	52.2245	65.0529	57.1964	67.7496	65.9562	77.8924
ALDOA	297.143	196.552	280.583	279.944	164.037	290.332	411.263	300.203	305.186	316.605	401.318	221.524	218.723	552.475	205.125	299.319	282.099	414.201	386.117	354.457	300.503	431.558	347.766	901.233	263.58	491.857	394.776	306.361	364.039	333.341	310.889	328.872	336.767	389.285	375.506	338.202	298.328	328.015	319.989	457.892	567.854	416.372	436.788
ALDOB	0.202216	0.175324	0.153325	0.313534	0.219924	0.199386	0.430334	0.507847	0.211944	0.206215	0.315106	0.189016	0.549216	0.351768	0.437627	0.119636	0.159293	0.447364	0.101784	0.0541807	0.389593	0.124143	0.151034	0.913183	0.0463867	0.606676	0.317477	0.437056	0.227163	0.432904	0.885649	0.204578	1.5355	0.383507	0.260323	0.0890772	0.232663	1.3343	2.05387	1.48805	0.691096	0.346374	0.306932
ALDOC	29.899	21.9927	15.005	28.837	34.0385	12.2066	19.095	23.0114	14.0885	24.6835	22.7807	19.8097	33.7717	33.672	20.4971	17.2446	12.0592	14.1406	13.7593	20.4672	12.7012	19.8459	20.0183	18.3735	15.138	18.5298	13.9648	13.8483	12.9713	10.2367	7.29536	13.7224	7.29323	12.123	6.09932	10.4285	16.9778	10.6447	12.7521	7.79324	14.5737	13.9743	19.1328
ALG1	14.4711	12.8731	11.7244	15.4563	11.6053	13.721	15.9251	12.3855	14.17	14.1433	11.6278	13.9932	9.83803	16.2451	12.4372	13.3733	17.6855	15.5448	17.267	14.4904	11.3938	14.3976	14.007	18.7334	12.2808	16.3529	12.5452	12.9439	11.561	12.9824	15.856	14.1699	13.1737	16.12	22.4607	13.4857	13.5768	11.5552	11.2313	13.3893	20.3116	13.3667	16.1127
ALG10	1.58643	2.14972	1.50264	1.79881	1.86246	1.96738	1.56125	1.69997	1.93201	1.71147	1.6725	1.94245	1.75229	1.76334	1.71451	1.86693	2.25807	1.75039	1.73284	1.71711	1.58437	1.70783	1.78053	1.62747	1.63289	1.75526	1.80525	1.91012	1.80766	2.62523	2.14341	1.64103	2.13645	1.35908	3.12992	1.82265	2.30885	2.98505	2.05945	1.79003	1.38347	2.17147	1.60878
ALG10B	8.35281	14.9105	5.77476	8.44146	10.9524	6.85306	6.88573	8.28199	6.80946	7.83197	5.18178	9.27766	8.34868	7.28357	9.18485	7.19641	8.93341	6.93028	8.37607	7.00951	7.21526	5.02878	4.89499	4.41927	7.35157	6.84133	6.04208	8.6197	4.62546	6.83111	4.66432	7.79716	7.38557	6.4954	7.25096	6.11252	7.27506	5.34744	7.37494	7.10317	4.21865	3.37087	6.86393
ALG11	20.9452	22.6192	38.6526	36.3772	27.7489	38.1669	28.5009	26.1935	30.6601	19.0764	35.9909	25.7686	20.7901	18.1357	26.2359	32.9381	50.9827	37.6038	31.0741	21.8906	38.0812	38.682	26.4778	15.2528	29.3216	28.9507	32.8262	53.8222	42.5053	42.5037	40.6364	35.437	67.5366	34.5961	41.6446	37.7164	39.1109	39.0922	47.9057	20.5347	23.4301	41.3612	41.7323
ALG12	22.638	21.7474	20.097	23.096	16.0605	22.2542	21.5625	23.1739	24.9063	25.7142	20.7904	21.699	20.684	28.063	22.9373	25.2244	19.0041	22.0882	25.8202	19.1692	22.8621	21.4308	25.735	23.0669	19.0111	20.78	27.5062	19.3607	22.3093	15.1293	19.322	17.4196	17.6931	18.7686	21.0059	21.2841	23.7435	18.7949	16.841	21.6684	23.6194	29.5562	24.7652
ALG13	29.4171	39.2706	39.9147	35.5968	43.2882	47.9232	33.1728	39.8027	32.3462	29.9214	39.1321	41.5526	33.0696	17.8094	41.3865	33.4248	43.1985	37.5263	32.7323	30.3417	56.4522	36.4782	38.0967	29.3304	37.6756	37.9025	37.0253	32.1592	36.1899	39.0983	30.4773	31.3467	39.3959	33.8811	34.4835	44.1063	39.4484	38.4536	50.6536	37.7955	22.5565	33.9714	41.131
ALG14	7.09441	7.37068	6.27216	8.55997	8.57925	6.22415	7.14889	7.34909	7.55393	6.84806	8.59261	8.57645	8.08642	12.1682	6.75431	6.33664	8.7573	8.47426	8.05586	7.10698	6.26121	7.61528	6.63911	9.55999	6.22694	7.84834	4.93184	7.19149	6.86874	7.49751	7.32905	5.97444	7.77669	6.82355	9.26012	5.52818	7.64932	5.68272	6.28272	6.34155	7.87007	4.95789	6.98717
ALG1L	0.477171	0.383797	0.319052	0.181859	9.31755e-05	0.141498	0.21338	0.456992	0.226653	0.24504	0.480374	0.000437891	0.0816642	0.376976	0.0640653	0.102967	0.133859	0.0118155	0.0759406	0.505669	0.104372	0.166618	0.41073	0.549061	0.298507	0.000110832	0.258831	0.220449	0.283862	0.218606	9.71798e-05	0.33814	0.173728	0.345404	0.0924869	0.394545	0.758783	0.000554244	0.000799767	1.01167	0.176229	0.158279	0.000717456
ALG1L9P	0.599171	1.20618	1.0751	0.894705	0.690784	1.06285	0.799125	0.954116	1.22691	0.635536	0.479226	1.09539	1.00371	1.09985	1.29041	0.866118	0.665213	0.706439	0.634788	0.79277	0.626678	0.684985	0.610123	0.598182	0.406462	0.94477	1.23021	0.407417	0.755652	0.697032	0.328018	1.02442	0.860415	0.817212	0.745326	0.840711	1.08727	0.560959	0.845967	0.279085	0.640085	0.809519	0.592069
ALG2	27.3699	36.1803	14.6697	24.2106	30.6044	23.0591	24.9471	29.0757	28.5663	24.8649	38.4802	33.4877	25.1562	22.6825	21.6071	23.7835	29.1007	24.3184	25.9631	27.256	21.8369	26.7135	26.8177	29.4716	23.7986	25.9624	20.6723	23.6906	34.314	29.3263	29.5346	18.959	23.2616	28.1227	36.5638	20.1225	21.5762	24.8513	29.5401	32.6041	29.4646	15.7104	31.3209
ALG3	7.56493	5.41992	6.97212	8.52854	3.54718	7.51403	8.06916	7.04544	9.77089	7.15574	11.1128	9.926	5.8741	10.751	8.66561	5.70697	8.89135	8.95579	8.83745	9.0508	8.35388	8.28368	7.49008	14.7444	8.13432	12.4517	9.26609	9.26837	10.0825	4.89109	12.9433	5.58182	6.49871	8.0058	9.91346	7.56114	8.02728	9.4075	5.24146	10.1914	11.0476	5.67583	10.9247
ALG5	23.2856	19.2957	17.2709	17.8226	20.8594	18.3584	18.7596	23.0521	17.4785	19.8134	25.7663	22.7324	17.3704	29.3042	16.1137	17.2697	19.5093	18.4607	18.9098	22.6166	16.8686	19.3803	16.8286	30.0573	21.2109	21.1707	17.2852	19.6261	20.5399	22.9845	20.5799	19.9875	20.0241	19.018	20.2646	18.5675	17.6974	19.7068	19.8652	20.2255	24.2854	17.8574	21.3173
ALG6	9.65543	11.601	8.48677	9.5024	10.5646	7.88868	7.30146	8.40847	8.80532	9.03523	9.29275	11.1766	9.83869	10.55	6.7483	8.07943	9.65135	7.19076	8.59324	9.16356	6.70627	7.11152	6.94325	9.40305	8.19398	8.62904	6.54162	9.17622	8.89825	10.1803	7.37127	7.0906	9.23646	10.279	10.0842	7.27866	6.00465	10.0936	8.43923	6.0635	7.41255	6.82645	9.18292
ALG8	11.0254	14.2843	11.5271	9.8058	11.2219	9.45215	10.3855	16.001	14.0862	10.8508	14.2544	15.5398	9.80753	15.2181	12.6913	9.08634	16.6655	11.7117	14.1804	13.2644	8.85238	8.62967	9.91064	11.6171	11.4162	9.44962	10.0037	11.97	13.8206	11.651	7.95181	11.0427	12.4605	12.398	16.6511	10.4374	9.37762	12.7275	10.8193	11.228	9.65486	9.08457	10.7442
ALG9	5.17121	6.34695	4.50333	5.92387	5.80825	3.7119	5.36716	6.9593	6.401	7.97979	7.97756	7.74882	4.96929	8.70423	5.46857	5.11266	8.17479	5.49826	6.64525	6.5301	7.62741	7.66322	4.64445	6.73918	6.10457	7.92467	6.32392	6.8425	5.56576	4.98124	5.35785	4.7397	5.96238	4.38452	5.00511	4.6888	5.80007	7.02102	7.74089	10.765	4.88038	3.692	10.1705
ALK	0.0467357	8.38274e-05	0.106177	0.020137	8.4978e-05	0.140335	0.0424709	9.47635e-05	0.022258	0.0288492	0.024074	0.116213	0.0153385	0.000103314	0.0169157	0.116284	0.356694	0.115304	0.153327	0.0518402	0.0567991	0.650077	0.0316844	0.026941	0.051765	0.196667	0.206745	0.0563734	0.206005	0.252147	0.354316	0.152136	0.347342	2.04813	0.068167	0.178869	0.21152	0.174126	0.0626222	9.46079e-05	0.0702205	0.0731682	0.513814
ALKAL1	9.18271e-05	0.0351318	0.09439	8.98604e-05	8.4978e-05	0.066526	9.85261e-05	9.47635e-05	0.0265709	9.019e-05	0.000101141	0.174482	8.48689e-05	0.000103314	0.0674011	8.94826e-05	0.0199961	9.72975e-05	0.0102595	0.00782255	9.22969e-05	0.000106291	0.0189628	0.000121546	9.35412e-05	0.000107019	0.0177305	9.76526e-05	0.127822	0.0753737	0.0253987	0.0443091	0.000107459	0.0183604	0.447366	9.72288e-05	9.21523e-05	9.95428e-05	0.0374441	9.46079e-05	0.000105181	0.0248436	0.00010788
ALKAL2	38.3882	44.4935	29.3145	10.5087	50.3676	9.23389	16.2099	9.99266	9.78515	43.4924	2.90674	24.257	52.8082	11.7809	19.5043	16.9856	2.70643	14.1406	6.3458	5.97257	21.0839	1.68149	8.09415	4.22904	6.04906	3.97215	7.19401	5.83181	3.97376	9.59696	5.40618	3.28837	3.83859	5.00261	3.10663	8.43539	29.0292	11.9499	4.85447	8.42562	4.77422	3.31435	1.99447
ALKBH1	16.0923	13.2307	13.178	9.74986	11.5783	12.3727	13.1223	11.4144	11.5727	13.2264	12.0132	12.6736	12.1115	15.9657	11.292	13.738	11.4622	12.988	11.0949	11.6901	14.3608	14.7329	11.2261	15.2979	13.9806	13.0707	13.8237	16.7389	12.6307	10.6131	10.8629	11.7384	12.871	11.3927	10.0516	17.5647	15.4555	12.501	13.835	15.7166	11.4538	11.13	12.7991
ALKBH2	10.6291	12.5101	7.32419	11.7472	8.63333	10.3894	8.64461	13.0952	9.61434	11.7852	16.7997	10.3542	11.5915	20.0167	13.3285	7.61008	11.8566	8.33505	10.7982	14.8545	7.97264	9.66693	10.3135	13.6486	11.0716	8.4546	10.4222	6.64611	10.427	8.32099	9.27599	10.0694	7.87541	9.82592	11.8716	9.22853	8.06528	7.73764	7.28339	10.8727	13.7824	8.39525	8.32359
ALKBH3	24.0685	17.8746	19.7434	16.8931	20.0054	19.8129	20.3604	22.9099	15.4126	21.7806	22.165	17.0918	20.5773	31.4389	17.8887	17.7826	20.5762	19.1637	19.0067	23.0865	20.034	20.5764	16.8297	29.2021	19.7055	22.3453	16.2746	18.3859	15.696	16.6535	14.346	18.956	18.8087	20.8865	18.8914	19.1842	19.2823	10.9928	16.0008	20.9988	25.2946	15.953	17.0508
ALKBH3-AS1	0.0156399	0.0351318	0.176899	0.0660781	0.0489381	0.232602	0.0507145	0.040715	0.0530528	0.0687984	0.0287379	0.145415	0.0916068	0.000103314	0.1852	0.0698248	0.199092	0.0517049	0.101784	0.038728	0.101701	0.0276699	0.132166	0.0481774	0.0772488	0.0392405	0.105891	0.235383	0.11363	0.0941911	0.194075	0.105101	0.216022	0.127904	0.113941	0.0712812	0.296091	0.116117	0.093456	0.0930916	0.0210443	0.0990429	0.087772
ALKBH4	13.2429	12.566	8.22505	10.3226	9.59112	9.42109	10.7403	11.2857	8.03682	11.8925	7.80023	9.08837	11.9504	13.0674	11.4044	7.46929	7.33758	8.70218	10.0164	11.2628	7.29991	6.24131	10.1634	12.4003	8.89924	10.9649	9.19308	6.43167	7.48574	6.02025	8.10362	10.6112	6.30729	12.5118	7.41908	9.39787	8.55524	4.81487	4.81535	12.8561	16.9375	7.2536	10.0126
ALKBH5	85.1878	94.0339	91.4087	100.83	87.3372	92.0391	99.3466	94.0562	98.8835	93.0139	114.648	81.026	91.9796	87.7053	86.532	87.0199	92.8312	101.409	95.6942	91.5729	92.2778	97.2583	101.204	120.204	88.0496	120.981	105.335	93.2738	111.859	100.108	97.7229	98.1343	108.341	124.99	173.202	90.0478	95.5656	77.4128	92.5504	105.905	119.542	86.0713	112.035
ALKBH6	3.89055	3.53189	3.47837	3.69627	3.03767	3.3152	4.43409	4.65257	3.82524	5.57893	5.12386	4.24087	3.30686	8.03113	2.52626	4.90477	3.0576	4.72826	4.13498	2.36396	2.28363	3.77999	3.82546	5.17437	3.22828	4.79009	5.36402	4.04014	3.66185	2.84351	3.212	4.05941	2.56248	3.62809	4.68702	4.81095	3.88571	2.47436	3.06703	4.8461	4.07588	4.46112	5.2262
ALKBH7	38.4193	19.2239	17.056	25.653	21.1045	19.5306	26.1053	20.6758	21.6093	26.4012	23.9691	20.1439	25.6567	48.3892	30.0725	17.2645	11.2632	21.3313	24.0406	28.6571	18.5776	22.1337	23.2634	41.1199	19.9679	27.1587	19.6776	16.6213	22.0397	15.1669	16.7581	26.9252	13.9026	24.7022	32.2202	16.4792	18.944	13.9512	16.729	19.4179	38.842	18.9951	22.8366
ALKBH8	1.76792	2.83283	7.23752	4.38479	2.93155	4.45046	4.52821	3.06693	3.7784	1.53713	1.96104	2.42553	2.89847	0.0971469	3.10518	2.98148	9.90853	3.07717	4.4741	2.9918	3.1252	6.89606	2.91211	1.06379	3.4417	2.40503	3.62883	10.6204	4.23739	5.09904	5.04255	4.84702	7.48128	7.55534	4.95165	5.27973	3.87707	4.63101	4.19107	0.705848	1.41574	3.4794	4.14246
ALMS1	16.5507	21.4983	26.8054	23.9501	26.1534	18.9626	17.013	16.9168	20.6378	15.9397	19.11	16.1843	17.9002	13.926	20.9361	17.7646	26.9382	22.1355	18.2819	15.6402	22.4914	21.7033	22.5338	12.8879	18.5015	19.3639	19.6954	33.5796	20.071	25.7885	23.5709	20.4097	31.1295	20.8463	53.8442	19.3962	22.7528	25.9806	21.8563	15.7264	14.4531	24.4054	22.2572
ALMS1-IT1	1.15065	0.876284	0.919484	0.643476	0.745094	0.299032	0.329103	0.954669	0.741582	0.824589	1.20285	0.465158	1.08309	1.68809	0.286171	0.886725	0.776177	0.516174	0.620424	0.834543	0.728289	0.689197	0.735919	0.432624	0.571042	0.430575	1.18145	0.991656	1.12124	0.752799	0.514561	0.525115	0.587875	0.639109	0.731997	0.676345	0.74009	1.24729	0.709587	0.781269	1.27739	1.21203	0.2631
ALMS1P1	0.515147	0.403136	0.730891	0.314486	0.66089	0.315639	0.35441	0.853119	0.304631	0.240569	0.128967	0.872105	0.808528	0.228685	0.62274	0.250992	0.139393	0.240933	0.427205	0.471404	0.321854	0.441124	0.284152	0.0962333	0.0463867	0.156641	0.564327	0.487474	0.496804	0.357634	0.304194	0.598288	0.228017	0.346992	1.69368	0.160261	0.27608	0.899235	0.298833	0.317886	1.01552	0.197975	0.087772
ALOX12	0.886331	0.350564	1.22595	0.56099	0.818374	0.664398	0.847916	0.934359	0.503245	0.773058	0.658748	0.683165	1.08309	0.316602	0.589083	0.617745	0.537383	0.757009	0.752626	0.680016	0.575875	0.702979	0.811388	0.801053	0.694491	0.508842	0.546695	0.605116	0.667104	0.508173	1.16397	0.70749	0.587875	0.83994	0.967834	0.836509	0.655519	0.696204	0.709587	0.706871	1.42396	0.989434	0.898665
ALOX12-AS1	0.637562	0.736092	0.907697	0.84144	0.891654	0.813866	0.898532	0.528157	0.582691	0.687173	0.558519	0.581429	0.39668	0.334185	0.572255	0.667556	0.457785	0.980642	0.783134	0.56412	0.62668	0.537597	0.679317	0.256419	0.524749	0.82191	0.634856	0.705953	0.681296	0.52699	0.66637	0.735122	0.683837	0.420021	0.642541	0.498385	0.549805	0.725209	0.560222	0.818468	1.04706	0.692637	0.920581
ALOX12B	0.046736	0.0176078	0.0354547	0.0660781	0.134431	9.58231e-05	9.85261e-05	9.47635e-05	0.0530528	0.0687984	0.0144195	0.101813	0.183129	0.000103314	8.72566e-05	8.94826e-05	0.0398956	9.72975e-05	0.0102595	0.0232753	0.0339619	0.000106291	9.55554e-05	0.000121546	9.35412e-05	0.000107019	0.0177305	0.0169037	0.170397	0.00010431	9.71798e-05	0.0166766	0.000107459	0.0183604	0.46363	0.0178932	0.021235	0.0291039	0.0374441	0.0558928	0.000105181	0.000110453	0.00010788
ALOX12P2	0.108928	0.040812	0.0472409	0.0165866	0.0977894	0.0831336	9.85261e-05	0.0204045	0.328869	0.0516214	0.0144193	0.731616	0.0305916	0.0880179	0.285012	0.0997096	0.0216692	0.120515	0.0305984	0.00782241	0.0508967	0.041451	0.0566963	0.0481774	0.0463858	0.0588062	0.123523	0.050515	0.166403	0.0753724	0.059134	0.0332555	0.107059	0.0366171	5.54922	9.72288e-05	0.0212346	0.0871111	0.0561147	0.167486	0.0210439	0.123776	0.00010788
ALOX15	0.155572	0.105228	0.0118806	0.148563	0.110004	0.132956	9.85261e-05	0.101645	0.132499	0.171861	0.0430564	0.174482	0.10686	0.140769	0.168372	0.528086	0.0597951	0.206528	0.111954	0.0310016	0.254114	0.0552335	0.207635	0.0962333	0.262421	0.117507	0.317477	0.0337098	0.127822	0.0941911	0.210943	0.149313	0.024098	0.146162	0.642541	0.0534852	0.21152	0.174126	0.0561147	0.018694	0.377009	0.445306	0.00010788
ALOX15B	0.0156399	8.38274e-05	0.0263042	0.000778184	0.0109496	0.0702667	0.269893	0.141214	0.00597851	0.000806886	0.00308824	0.189193	0.000721312	0.00352698	0.00149156	0.00105936	9.66493e-05	9.72975e-05	0.000797243	0.209934	9.22969e-05	0.000106291	0.000620367	0.000121546	9.35412e-05	0.000651287	2.03491	0.00056513	0.0158779	0.000889445	0.0268408	0.000327639	0.0448813	0.000103092	1.78002	1.93273	0.997841	0.0581083	0.521016	0.000353288	0.000396403	2.06659	0.0391
ALOX15P1	9.18271e-05	0.0176078	9.35396e-05	0.0165869	0.0367248	9.58231e-05	0.0760225	9.47635e-05	0.0265709	0.0344443	0.000101141	0.0582118	8.48689e-05	0.000103314	0.0169157	8.94826e-05	9.66493e-05	0.0172998	0.0204289	9.61919e-05	9.22969e-05	0.000106291	9.55554e-05	0.000121546	0.0155246	0.000107019	9.8385e-05	9.76526e-05	0.0284804	0.00010431	0.0169648	0.00562356	0.024098	0.000103092	0.14647	9.72288e-05	9.21523e-05	9.95428e-05	0.000102874	9.46079e-05	0.000105181	0.000110453	0.00010788
ALOX5	11.2981	4.98705	3.58002	6.0943	4.26071	9.01118	7.81945	5.13472	6.22782	6.41157	4.73472	11.6296	5.46891	6.76648	5.83664	8.70596	4.77887	6.38867	7.14743	4.98726	10.3412	7.39168	7.03801	6.28685	9.4993	10.3447	10.7718	6.33006	13.3825	7.92906	13.1659	6.66804	8.91091	6.34471	12.7215	12.7467	8.506	10.6407	10.9393	4.19097	6.41743	7.50733	7.60557
ALOX5AP	10.5883	3.71517	4.59704	7.95168	6.76624	10.5625	8.94168	9.15995	9.74543	9.60207	8.47951	12.6736	6.02527	15.7195	4.00526	10.9286	4.51728	7.50041	7.02715	11.5217	8.82312	7.16665	9.41486	14.9711	10.2309	8.96167	12.9597	9.61317	11.2257	12.6077	10.7954	8.79277	9.8962	12.0604	15.082	13.4361	9.85264	7.86028	9.24206	2.13902	11.391	14.1871	8.43778
ALOXE3	0.018973	0.0426453	0.0144075	0.170376	0.00015805	0.0101797	0.00778188	0.0247589	0.0242083	0.271263	0.0087951	0.0353756	0.231631	0.0748377	0.0613955	0.0847745	0.0242621	9.72975e-05	0.024789	0.0094789	0.0412227	0.226046	0.0115515	0.0195742	0.093789	0.0119877	0.0536285	0.0715288	0.302625	0.01153	0.0461855	0.037009	0.0146742	0.0666168	0.355613	0.0541248	0.0386051	0.0529328	0.079459	0.0339746	0.0128192	0.0301457	0.00010788
ALPG	9.18271e-05	8.38274e-05	0.0234931	8.98604e-05	8.4978e-05	9.58231e-05	9.85261e-05	9.47635e-05	0.30158	9.019e-05	0.0860116	1.04311	0.0305922	0.0352698	0.0566057	8.94826e-05	9.66493e-05	9.72975e-05	9.00623e-05	9.61919e-05	9.22969e-05	0.000106291	9.55554e-05	0.000121546	9.35412e-05	0.000107019	9.8385e-05	9.76526e-05	9.712e-05	0.00010431	0.0616843	9.70507e-05	0.0121027	0.000103092	2.64835	9.72288e-05	9.21523e-05	9.95428e-05	0.000102874	9.46079e-05	0.000105181	0.000110453	0.0220239
ALPK1	9.71893	8.2185	18.2696	12.8184	7.54921	10.9763	9.9108	10.1244	10.8635	9.45798	13.5566	15.1997	9.83483	6.93471	9.48026	10.5204	8.98209	13.0162	10.8472	10.3002	13.9961	11.713	14.0655	7.76064	10.7816	12.501	12.5829	11.8185	13.4575	10.8041	12.1713	12.8974	17.2935	8.11481	17.0473	15.3943	11.246	14.4917	15.6582	7.54549	7.2747	11.2354	12.3442
ALPK2	0.248861	0.403136	0.129751	0.148563	0.268777	0.066526	0.227871	0.0813351	0.185462	0.154684	0.18624	0.857571	0.244143	0.211102	0.0505726	0.119636	0.218991	0.344148	0.0814453	0.0696334	0.0508967	0.096579	0.0566974	0.576792	0.123542	0.332742	0.0882591	0.319413	0.28393	0.432904	2.817	0.0885211	0.0600838	0.146162	0.130206	0.302629	0.148092	0.696204	0.280162	0.0558928	0.000105181	0.247441	0.197352
ALPK3	7.36987	4.43366	21.759	11.5645	10.1249	7.39046	12.7553	6.98677	23.6749	6.88809	11.7985	16.4523	8.54213	7.91256	5.60396	10.4903	10.0095	12.7472	12.1119	13.0422	9.00941	13.1755	20.3579	11.3733	10.1537	10.7618	14.5642	10.5879	15.4406	34.9251	8.69538	10.2241	10.1841	8.25241	4.6599	7.45662	8.73207	16.3586	17.1584	17.2603	15.1181	14.2958	10.3006
ALPL	3.33971	1.89375	3.15952	1.29651	0.705765	2.31161	5.7962	1.40186	4.00752	1.39755	1.50324	17.2779	0.690996	0.448745	5.25317	5.87137	0.256539	3.9903	7.88231	1.83513	3.71542	2.06579	4.10692	1.80886	2.92691	1.52185	7.6364	1.60229	10.4145	3.47252	5.99975	3.52992	2.92232	3.01871	43.0296	3.88696	4.66745	3.90666	3.0478	0.656621	6.28447	2.72171	3.05304
ALPP	9.18271e-05	8.38274e-05	0.000268053	8.98604e-05	8.4978e-05	9.58231e-05	9.85261e-05	9.47635e-05	0.532778	9.019e-05	0.0144195	0.846435	0.0458458	0.052853	0.111853	8.94826e-05	9.66493e-05	0.0172998	9.00623e-05	0.00782255	9.22969e-05	0.000106291	9.55554e-05	0.000121546	9.35412e-05	0.000107019	0.0177305	9.76526e-05	9.712e-05	0.00010431	0.402371	0.0111501	0.072079	0.000103092	8.81838	9.72288e-05	9.21523e-05	9.95428e-05	0.000102874	9.46079e-05	0.000105181	0.000110453	0.00010788
ALS2	30.948	36.0546	34.9021	35.294	39.035	34.3828	30.8277	31.8402	29.7079	28.1238	29.3617	26.906	31.7578	25.2017	34.8374	31.6815	36.1922	34.9404	32.3826	28.5188	35.6113	28.5713	33.1437	21.9868	31.9308	33.1747	26.1989	37.577	30.4791	32.8573	32.1997	33.1649	38.0042	34.0803	30.9985	38.4504	33.1296	33.1707	32.5324	31.5975	27.4561	31.0357	34.2553
ALS2CL	49.0209	33.3426	45.102	49.3072	47.1	35.0579	50.1056	37.8768	31.1073	45.5608	21.1177	28.8617	57.9722	38.5875	41.8699	45.0768	20.7263	32.22	43.6215	45.0781	37.63	28.8602	39.4884	33.5483	39.9999	39.2607	32.1638	28.1785	21.3764	31.1489	16.2548	39.3848	23.107	32.7395	24.5179	23.3245	31.2039	19.2091	26.825	27.2085	39.9118	22.16	27.6231
ALX1	0.901879	0.350564	1.19059	2.68911	3.59079	0.896903	2.11332	0.751568	1.07261	2.59383	1.6324	0.0727456	4.4389	0.738599	0.908824	2.20173	0.218991	3.44061	1.30177	2.23301	1.45649	1.61258	2.50944	1.77819	1.65122	1.62415	0.775913	1.71432	0.752254	2.93561	0.244678	3.26626	0.431937	1.15031	0.366043	0.711937	1.26866	0.464169	0.336174	0.0558928	2.74313	2.91862	0.526092
ALX3	4.52457	4.52128	4.821	5.97203	4.44571	3.5375	4.25184	9.07871	5.36267	4.75814	4.13812	3.96781	5.35412	7.5609	4.76254	7.98977	4.33819	4.71359	4.12887	5.06086	4.18299	3.96927	5.16973	3.34801	5.20036	3.22862	5.57186	3.21006	2.68232	3.68831	2.80013	4.84684	2.795	5.05738	4.55418	3.27456	5.75093	4.52478	3.64087	9.72758	6.28184	4.42734	6.39959
ALX4	0.777494	0.753616	1.60313	7.34129	5.5327	8.35369	2.44232	2.72165	4.85952	5.63417	3.82311	0.770368	3.08132	4.87066	0.62274	9.98221	5.79085	3.95668	12.4983	5.80259	3.47173	8.72399	3.64148	4.43728	4.56768	6.6528	1.19908	3.27728	3.91699	5.51359	1.0965	5.01816	1.47552	15.1354	0.829584	1.05006	2.53723	0.783217	2.74469	0.0558928	27.2628	4.2542	5.19421
ALYREF	16.5388	13.7483	14.8896	18.6315	11.3484	15.2916	14.3008	19.7769	19.9207	18.1158	25.7466	14.9913	15.1341	33.7507	13.9806	17.4252	18.714	15.1311	17.5582	19.5351	12.5465	20.7811	15.2503	34.3968	16.9074	18.0128	17.6925	10.8921	19.6965	15.6921	21.1091	14.3339	15.5428	20.2054	21.4684	12.4895	12.1393	14.5298	14.1128	20.4789	26.1498	16.8978	16.9546
AMACR	3.24952	7.05904	2.89779	2.05559	8.03886	2.93232	3.86042	3.95567	2.56854	3.88385	5.96182	11.639	2.50689	7.48153	5.05728	4.65745	10.2482	7.87799	6.60492	3.12282	4.66406	2.73545	4.88084	8.98585	4.8076	6.53465	3.19069	5.88984	5.24341	2.70752	10.9838	7.48386	8.83647	7.34405	6.29288	4.17852	0.94802	5.12352	0.763366	3.09642	3.24899	4.81072	7.54623
AMBP	9.18271e-05	0.175324	0.0354547	0.0495811	0.0367248	0.0167034	9.85261e-05	0.0204049	0.0530528	0.0172673	0.0144195	0.377956	0.0305922	0.0176866	0.101058	8.94826e-05	9.66493e-05	0.0172998	0.0102595	0.0155489	0.0170271	0.000106291	0.0189628	0.000121546	0.0309556	0.000107019	0.0353627	0.0169037	0.0710553	0.0189217	0.0169648	0.0387826	0.000107459	0.0731323	0.0244856	9.72288e-05	0.0423778	0.377156	0.0187735	9.46079e-05	0.0629225	0.000110453	0.00010788
AMBRA1	12.4937	13.7482	17.9146	16.6526	15.7538	12.0928	16.6315	12.1761	11.6999	14.7972	12.9864	12.2261	13.2737	8.80604	17.5467	18.302	9.97996	10.7335	13.8386	17.0296	20.0331	14.7772	20.4851	14.9516	15.4822	16.3773	20.9596	14.7819	10.5446	8.17236	8.81374	15.6565	10.592	18.1746	9.07611	14.8266	17.6776	18.3006	20.9673	18.1197	13.9645	15.1539	12.6763
AMD1	43.1115	55.8823	55.4912	67.3355	58.2104	44.6874	46.0614	40.9671	59.2123	39.0423	80.1045	44.2668	43.1847	10.475	47.2826	64.5734	75.9714	54.9312	49.9185	40.2146	47.2074	61.3414	58.8756	22.9513	48.148	55.3001	50.2065	59.0696	92.2494	82.5335	62.4076	52.9943	70.3213	50.12	67.2708	49.9102	44.3678	82.4189	69.3953	43.7143	41.1865	45.4957	68.222
AMDHD1	0.979619	0.368088	0.601233	1.45183	1.3069	0.265817	0.822608	0.446917	0.384077	1.39143	0.171922	0.683165	1.67799	0.861682	0.976138	0.826952	0.696579	0.326946	0.956014	0.703195	0.491202	0.702979	0.415175	0.448643	0.277852	0.215341	0.405638	1.02527	0.36908	0.564625	0.168774	0.519589	0.264003	0.657366	0.219661	0.213649	0.422948	0.290143	0.317503	0.558076	0.5864	0.296908	0.219268
AMDHD2	25.0925	21.6511	19.7693	17.8822	12.5608	19.3547	15.4622	16.0593	19.2709	21.2932	12.0685	14.5857	15.428	18.0961	17.9325	15.3943	10.929	15.006	17.358	11.4682	15.8845	10.9819	17.4154	20.1972	17.4953	13.8389	17.1605	12.6426	10.3569	7.69375	10.6239	17.8311	13.0559	17.0372	8.19798	16.5457	19.4713	12.5478	12.0528	18.6189	20.5692	14.3028	13.7363
AMER1	11.288	16.4025	14.7811	22.2381	19.3337	16.8235	13.3627	12.7548	17.1206	12.316	22.3082	11.8306	17.9536	9.82913	17.7205	12.9908	22.4467	16.6006	12.8746	16.6504	15.6478	20.4937	19.8485	12.783	9.69079	16.984	14.3174	20.0666	18.7756	20.0218	14.0087	15.4964	12.0673	20.2292	20.1194	10.4107	13.6795	11.1378	12.8455	12.2385	14.9925	17.1401	25.2693
AMER2	0.343393	0.403837	0.0114091	0.0159271	0.046984	0.0638689	0.0122464	0.156077	0.130019	9.019e-05	0.0138468	0.390746	0.0440155	0.101383	0.662456	0.0185337	0.0737813	0.0331262	0.0196154	0.0446001	0.130152	0.251487	9.55554e-05	0.0154994	0.044535	0.0940275	0.287855	0.306641	0.299825	0.0723631	0.283474	0.0160134	0.103747	0.227955	0.830265	0.136771	0.000107458	0.417763	0.322732	0.785734	0.0604099	0.142573	0.589212
AMER3	9.18271e-05	0.0234069	9.35396e-05	8.98604e-05	0.0163399	0.0074636	9.85261e-05	9.47635e-05	0.0118375	9.019e-05	0.000101141	0.154823	8.48689e-05	0.000103314	0.0598135	0.00892874	9.66493e-05	0.00772904	9.00623e-05	0.0103794	0.00760525	0.000106291	0.00846583	0.000121546	9.35412e-05	0.00878761	0.00792071	9.76526e-05	0.0126891	0.0334968	0.0150635	0.00254883	0.00542904	0.000103092	8.86552e-05	9.72288e-05	9.21523e-05	0.0258345	0.00838591	9.46079e-05	0.000105181	0.011083	0.00983071
AMFR	81.5606	76.3278	79.134	60.6762	61.5726	67.6725	69.5025	83.7986	79.2387	74.8467	79.2539	63.0334	71.0002	77.0747	69.5362	77.1418	61.6999	68.2649	63.6021	75.1536	88.3277	84.4547	74.4689	95.3127	73.3762	79.7237	71.8825	56.1963	57.4726	59.6406	55.8404	75.0364	70.6744	65.8662	56.9384	76.4114	85.7051	74.3263	87.1127	108.475	97.8346	73.9204	88.6081
AMH	0.388793	0.122752	0.09439	0.709464	0.769521	0.398677	0.0127525	1.19839	1.20502	0.910475	0.0716932	0.31982	0.961065	1.35401	0.437627	0.777141	0.0796946	0.757009	0.233986	0.370961	0.914571	0.882142	0.641583	0.656885	0.38587	0.391442	1.55173	0.369831	0.170397	0.0189217	0.531428	0.630119	0.275998	1.16857	1.27686	0.818713	0.35952	0.464169	0.50421	1.20906	1.52866	0.296908	0.504177
AMHR2	0.949157	0.064867	0.0225072	0.0825746	0.157428	0.198066	0.186994	0.203194	0.146074	0.0118774	0.0705344	0.0899184	0.142969	0.000141063	8.80421e-05	0.118844	0.0811992	0.0952174	0.247991	0.342216	0.152304	0.123825	0.564624	0.0915253	0.383179	0.296868	0.0939622	0.201771	0.0173588	0.0941904	0.124579	0.204227	0.114183	0.15637	0.0099802	0.373736	0.160949	0.000130677	0.000132937	0.427034	0.188283	0.0990429	0.328723
AMIGO1	18.4556	22.974	16.8202	24.8612	26.283	21.7228	16.2984	18.5432	16.1276	14.8067	13.4021	13.5601	20.6688	11.7809	18.0234	14.7043	16.5167	22.8967	13.9729	15.9164	18.5945	15.6149	26.2822	10.9729	13.7029	23.1084	11.8313	21.4278	11.9636	14.6212	12.8533	18.9173	15.534	14.7885	5.07465	22.423	16.2166	13.8062	11.6692	23.4911	20.8973	14.9636	14.2236
AMIGO2	19.1831	10.4308	17.905	15.8379	11.9471	31.1287	28.9066	31.676	22.2195	18.3514	168.157	14.9607	20.9794	37.4269	12.0865	25.1513	53.6723	18.9509	33.8817	60.3474	20.3853	85.3056	42.5314	213.967	42.1598	48.6391	42.2164	24.5271	49.6804	95.5376	25.9042	39.6862	44.2509	92.9767	46.415	19.0385	29.6332	62.2176	132.989	46.71	29.3653	34.4177	108.394
AMIGO3	4.97547	4.24089	4.46739	5.42763	3.1389	5.86256	3.74568	4.93545	7.04427	4.75814	6.38611	4.8253	4.05755	5.62674	6.22662	5.09077	4.37799	4.50716	4.07802	5.95712	4.19992	6.54647	4.33957	6.07118	4.69113	4.32435	5.71291	3.31089	4.95298	4.06465	4.41099	4.68657	3.38277	5.09389	4.65177	3.61268	5.39151	3.79967	3.80891	7.42125	6.3656	6.77698	6.24618
AMMECR1	2.89615	3.13713	5.72806	6.87932	5.47278	6.5588	5.40906	4.71429	6.42951	2.76166	5.82913	4.2121	4.66938	2.19377	5.19089	4.99235	10.1888	5.87557	6.51041	3.95809	8.5899	8.77537	5.02416	4.36904	3.65232	10.665	10.9139	11.0811	11.48	11.3549	10.9763	5.59869	11.7752	10.1667	19.8971	8.11884	7.84342	8.82591	6.52626	3.23183	2.88389	11.2875	11.0555
AMMECR1L	21.74	23.4764	27.3057	27.7673	18.8603	25.2043	33.4853	28.1765	29.742	18.7145	39.7098	17.4888	19.0162	15.407	20.6458	37.1379	27.4778	27.1142	25.5615	19.4777	28.457	37.585	37.7903	27.0733	26.3499	34.3024	41.6059	31.4096	38.9276	40.6475	37.4957	22.4031	59.7915	33.1987	24.1317	38.1866	31.4769	48.5234	66.2805	31.6352	30.0856	36.0281	42.8148
AMN	0.046736	0.350564	0.0354547	0.0990723	0.0122982	0.0333109	0.0380605	0.040715	0.145739	0.0687984	0.0430564	0.334354	0.0916068	0.105603	0.202029	0.0499004	9.66493e-05	0.0689075	0.0102595	0.038728	0.0170271	0.0276699	9.55554e-05	0.0161402	0.0618177	0.0392405	0.0177305	9.76526e-05	0.80902	0.0565564	0.194075	0.0111501	0.0360932	0.0183604	5.04212	0.0178932	0.021235	0.0871126	0.000102874	0.0744922	0.0629225	0.0248436	0.065856
AMN1	8.81529	12.311	9.88307	8.29362	10.2138	6.96766	7.69576	9.41399	6.33755	10.4945	9.42261	11.973	8.05212	10.1688	12.9268	6.09866	7.98095	5.34958	6.20892	7.45502	6.81249	6.6852	7.91021	7.81887	10.843	5.95668	9.3576	7.90993	7.82303	7.6643	4.70475	6.03015	8.20458	6.2643	19.3026	9.44057	9.78398	6.76798	8.39133	5.71489	4.64999	7.26986	7.63161
AMOT	12.8634	16.1524	15.2608	24.1215	24.3946	17.9906	19.1569	11.9029	14.3692	9.87195	13.4037	20.3257	18.7281	4.31613	18.8675	12.0789	13.7015	23.0344	14.5685	11.5787	20.6285	18.2122	17.8513	7.44106	15.6469	16.8172	12.8215	17.5924	27.8089	16.8736	13.9568	16.1918	10.5439	16.2026	50.6721	12.229	19.1402	24.0718	15.6141	16.1706	9.04804	25.4149	24.5401
AMOTL1	30.7857	42.7921	86.8149	63.4591	54.0575	103.554	65.5389	39.067	61.0767	37.4317	45.8283	28.6448	38.7107	23.7188	39.8891	68.9421	68.1375	61.8852	60.4939	44.6417	80.8598	97.27	76.8859	36.6836	51.1383	49.3813	78.584	80.6741	73.2722	86.0778	84.3797	66.9641	99.6311	62.14	48.8175	77.1406	74.4317	82.8839	80.7176	40.8377	63.2776	95.1031	102.625
AMOTL2	96.8895	60.2618	128.748	123.69	54.2457	168.553	209.108	117.398	189.367	93.5954	265.67	59.3249	89.5116	117.002	76.7906	236.003	93.9843	62.2682	160.342	96.2843	156.303	381.274	200.971	152.093	253.106	210.35	320.083	145.839	261.822	254.787	75.4487	102.312	300.132	140.197	158.586	261.144	216.454	188.94	254.38	77.0266	121.418	185.929	103.897
AMPD1	0.663863	0.061614	0.00924278	0.373642	1.15888	0.386825	0.000297976	0.0316246	0.267311	0.0400893	0.0475772	1.73606	0.225046	0.122938	0.0136702	0.576832	0.139113	0.160331	0.0237709	0.0120908	0.0132373	0.000244131	0.10261	0.000121546	0.515137	0.258302	0.0959022	0.195774	0.143301	0.0877418	0.0197365	0.27464	0.00941832	0.0142746	0.0758374	0.0139107	0.22985	9.95428e-05	0.145026	0.216651	0.552713	0.0020369	0.102177
AMPD2	12.0257	18.7191	12.7512	30.3776	16.5828	24.5609	12.8816	13.4117	30.965	14.8947	31.5418	18.6524	15.0497	6.72676	29.6304	14.2166	25.6322	16.8181	18.2353	16.6253	14.7434	21.84	13.8978	8.2195	12.785	18.161	27.651	12.1557	20.4782	13.042	20.4511	17.3648	13.7184	15.964	33.5611	18.7925	17.8103	15.8308	10.65	23.8566	16.0518	17.6723	11.0798
AMPD3	2.11663	2.01644	0.882968	5.41301	3.18202	5.34357	2.00543	2.60827	2.38538	1.12479	1.78606	5.74632	4.38998	0.691119	3.04879	2.57699	2.67075	4.30867	4.16274	3.63762	3.19625	4.4134	2.27048	0.204855	1.99182	3.5152	3.8641	2.91444	3.56096	3.14438	5.50852	2.27406	2.89154	2.63201	4.64904	1.65527	3.8594	4.31416	3.15924	2.8218	1.9034	4.48753	3.35963
AMPH	5.1598	2.81881	5.4601	5.75408	6.29669	5.95659	4.84495	4.90285	5.26983	4.73457	4.21637	2.06897	6.77719	1.72033	5.731	5.01886	7.20418	8.18346	5.22912	5.62888	7.02708	5.14509	6.76227	4.82465	3.24912	5.30116	7.69574	4.70678	9.49006	5.93768	8.85792	5.05501	8.11229	8.93751	6.04414	5.66992	7.33114	5.831	8.88363	2.27545	2.08584	4.9424	4.80858
AMT	31.1087	33.6797	38.4841	23.1874	16.1264	35.8108	38.3258	37.5894	31.9319	29.2448	33.0805	34.0136	28.6277	14.5705	32.66	40.0661	23.48	30.2304	32.0972	36.5213	34.4781	28.4268	34.3353	34.145	43.1732	32.1254	30.9878	24.1573	29.2855	25.8556	22.4197	37.4554	30.5384	29.2378	25.9899	37.002	28.4396	31.1261	30.8014	33.9117	30.3961	38.8177	36.2683
AMY1A	1.25224	0.966383	1.12954	1.00242	1.96277	0.793957	1.31471	1.53109	1.19198	1.70946	0.954676	1.20607	1.96935	1.6708	2.7408	1.08734	1.18171	0.617994	1.07681	0.893936	1.28834	0.78675	1.05887	0.896083	1.13946	0.924329	0.792323	0.961303	0.673691	1.11844	0.630026	0.765397	0.563624	0.466807	81.5716	1.1932	0.914231	0.850131	0.982028	1.33575	1.65325	0.849336	0.742474
AMY1B	0.26755	0.206485	0.241343	0.214188	0.419308	0.169666	0.280897	0.327113	0.254677	0.365216	0.203994	0.257677	0.42071	0.35697	0.361025	0.232326	0.252491	0.323115	0.230072	0.191027	0.275263	0.168136	0.226246	0.1915	0.243469	0.197521	0.169319	0.20541	0.143977	0.238982	0.13465	0.163564	0.120473	0.0997919	50.6759	0.254947	0.195354	0.181668	0.209842	0.285398	0.35322	0.181506	0.158678
AMY1C	1.062	0.819564	0.957929	0.850126	1.66451	0.673339	1.11497	1.29847	1.01088	1.44978	0.809643	1.02285	1.67012	1.41696	2.3244	0.922139	1.00218	0.524114	0.913203	0.758149	1.09261	0.667236	0.897994	0.759956	0.966362	0.7839	0.671954	0.815244	0.571353	0.948527	0.534312	0.649108	0.477998	0.395899	69.0371	1.01192	0.775339	0.720985	0.832836	1.13283	1.40207	0.720312	0.629691
AMY2A	1.50627	2.6171	1.08699	1.46883	1.50707	0.830664	0.699904	1.15521	1.16419	1.19147	1.31214	1.02771	1.94448	1.98284	1.68532	0.827953	1.32728	0.88922	0.894915	1.17262	0.912504	0.838805	1.10481	1.17258	0.676381	0.849006	0.865074	0.758177	0.555806	0.873526	0.441492	0.845236	0.875835	0.694655	4.75476	0.60042	1.31108	0.870498	0.806703	0.746297	0.799671	0.948467	0.978981
AMY2B	48.11	71.2707	40.6639	41.2643	70.5707	31.6672	40.0551	52.2707	40.8758	50.1169	36.435	55.6805	65.9772	49.366	49.2335	41.48	43.8309	32.5613	38.2859	38.3528	37.8245	28.2651	37.5462	27.4045	37.9321	32.3319	38.9753	36.704	24.8247	32.3539	20.0248	34.5462	29.7599	28.8961	123.209	37.5718	43.0041	38.5147	29.3746	39.6733	28.2692	26.8862	29.2349
AMZ1	3.76034	6.21744	8.28753	9.24896	7.95243	6.62549	5.28581	3.68778	6.35246	5.55433	4.16143	3.12652	5.81454	2.02295	7.12615	7.80586	8.25955	6.60164	5.58702	5.91002	7.70858	9.54336	5.43359	4.29402	5.86898	5.54555	7.35461	6.12365	3.71375	6.4865	8.75813	8.86078	8.36358	8.00085	2.81954	4.46204	5.93109	9.68883	12.6469	6.97716	6.54903	8.8266	7.99367
AMZ2	40.2433	30.9148	37.4362	35.036	30.1375	39.4006	30.3488	28.6907	29.099	17.617	19.107	28.3375	27.9165	13.0719	38.8768	24.5481	27.8718	36.983	32.1707	22.9521	46.9166	34.817	31.2781	24.0494	29.6276	36.3529	41.2584	33.5033	35.3658	25.6345	41.0316	28.1955	41.6632	32.4333	26.9424	54.667	38.9678	32.5288	39.803	22.3331	30.1743	32.4558	31.9032
AMZ2P1	27.9456	27.2953	19.6493	22.0876	36.053	21.3005	21.3428	22.4867	18.7115	24.578	19.5291	18.8009	31.2503	24.5726	25.3395	16.6066	16.2701	19.9515	19.2781	23.2384	21.7801	16.8876	18.9532	20.0519	22.4597	21.0046	17.4317	15.4519	14.1069	18.5149	12.256	21.2743	16.063	21.181	12.3478	18.0955	24.0105	14.8304	15.5116	22.0364	21.5432	15.6314	17.7132
ANAPC1	40.8186	48.8452	67.4908	52.5128	58.8428	47.8841	40.5735	44.1003	45.7723	40.7644	49.2549	44.0073	46.7864	39.0702	48.6478	42.7579	55.757	45.5016	47.1431	42.8177	47.1067	54.0809	46.1659	33.2764	57.9285	46.069	45.9696	59.9193	40.8465	49.5464	43.1305	44.658	55.2927	45.7594	57.0153	51.6488	47.1383	42.1371	38.2323	40.7125	33.1857	46.0181	44.1013
ANAPC10	7.49221	6.92494	6.04073	4.5842	5.41506	5.01742	5.00164	5.6323	4.85017	3.85918	8.62074	3.34265	6.00215	5.23696	3.57522	4.71592	5.15455	3.98243	5.39674	5.92684	5.36977	6.03333	7.07198	5.6018	5.1503	5.56427	3.76467	5.66044	3.98993	5.17713	4.60035	4.58965	5.71234	5.06221	3.82376	6.02744	4.31853	5.31884	4.90254	6.37181	5.64783	3.45782	5.66863
ANAPC11	17.1381	10.1407	9.45294	12.0405	8.32949	11.6951	14.9221	11.5438	10.9567	16.1628	15.0829	8.55067	9.01817	24.7666	10.9079	12.3102	9.14294	13.143	13.8451	15.7423	9.22917	13.3299	12.3685	30.2753	10.5797	12.5342	11.7486	10.3365	12.3374	11.5096	11.0565	11.7802	10.2619	12.8081	12.0016	10.4605	8.65256	11.3483	11.7427	17.6648	27.7477	13.5803	16.6385
ANAPC13	42.3825	33.3226	30.5672	30.7837	33.8999	27.792	40.561	35.7816	19.9233	35.8406	45.809	35.3439	28.0878	49.9599	31.4354	26.491	33.2424	36.7683	37.3954	37.0531	39.158	30.2831	22.349	46.0596	33.6658	34.8142	30.3564	34.0226	28.7102	38.9519	25.321	30.8335	26.2002	27.0442	22.5327	34.0333	31.4347	37.7698	37.0359	54.6437	38.7821	27.6989	41.0477
ANAPC15	9.87928	4.70323	5.44786	7.42936	6.76228	7.07879	11.4794	6.20763	4.46969	9.76946	8.54492	4.23433	3.34027	11.8508	6.72926	6.02708	7.03173	13.7462	8.24122	8.25018	6.77678	8.4054	6.46267	25.776	7.78452	17.3225	5.42534	10.1309	9.13015	9.57719	8.62646	9.37223	9.64156	9.21093	5.02153	6.37511	8.41764	5.437	7.46527	12.242	8.5334	8.15953	11.039
ANAPC16	78.2783	91.3876	53.9459	62.6674	55.7571	45.3832	51.7281	49.9125	38.2959	54.7886	66.6807	44.4442	59.3721	65.5799	43.819	40.9421	44.5483	57.2649	41.6813	52.7995	39.7895	44.613	41.3905	48.7476	49.1256	47.9465	40.6147	55.1226	39.6832	44.0193	33.4234	49.6441	53.7744	50.8968	26.8392	41.9718	43.2172	36.3001	51.3352	54.9241	57.846	56.2851	57.8482
ANAPC1P2	27.8996	28.4285	15.336	18.1939	14.5235	33.5456	15.8055	17.5166	19.5574	24.1814	20.3662	16.9232	22.2077	27.4423	24.2186	17.3109	19.2248	20.771	20.5599	20.5953	17.0433	14.3464	21.5595	13.759	8.52394	16.3198	11.8827	15.861	13.8609	14.1185	14.2683	20.088	12.2815	15.3052	16.5291	16.6879	22.472	18.7551	14.2731	11.4066	20.3776	10.5816	17.4772
ANAPC1P4	5.64848	2.5656	4.19361	4.95746	5.41585	1.84144	5.02547	2.80546	2.2091	2.6389	2.29297	2.92185	3.23123	2.55497	1.90654	5.50151	3.65083	4.09778	3.87127	2.94806	3.43688	3.63408	5.6296	7.23469	3.23563	5.77438	3.41105	3.56875	4.3648	4.29144	5.43625	2.19097	4.18859	2.94602	1.20824	6.78867	1.8187	3.6363	2.97736	2.59144	7.49681	8.46654	1.02597
ANAPC2	41.56	38.2375	36.9879	40.6324	36.6643	33.8961	39.1642	42.4685	32.9436	43.4065	36.9129	33.8057	39.9494	46.244	36.7871	39.5102	26.3072	32.0656	34.8405	34.3747	35.6309	32.6492	39.3195	43.7149	32.5442	36.2377	39.5666	23.7303	27.9718	23.8605	25.2088	32.706	29.1966	31.7678	36.8151	32.549	37.3806	31.2668	37.9015	44.7502	50.5052	34.6265	38.1997
ANAPC4	38.1772	44.7501	32.1062	28.1572	40.7179	18.5277	24.1887	37.5536	41.2752	31.3543	23.319	57.1106	27.8755	33.1833	30.8301	21.5705	32.9893	26.5334	31.9962	21.6436	22.5108	27.8074	30.6983	26.786	32.3605	28.8643	19.7902	32.4271	31.9659	25.6355	22.879	27.8358	26.8508	30.4352	98.1967	22.0064	26.1775	35.5989	19.8704	25.3372	29.2094	23.4836	33.0576
ANAPC5	44.0172	43.6657	54.1204	64.171	58.7588	57.9997	57.5759	57.3811	55.1641	54.7047	69.5924	45.7718	56.1223	40.4117	46.8032	50.8011	60.7042	62.1624	50.851	53.3891	50.3088	62.2627	53.0485	53.7031	51.5491	56.8769	58.1738	50.1409	56.5755	60.3641	54.8709	53.6164	53.5579	61.7812	64.8886	53.6427	52.7063	62.3241	52.1197	53.375	53.6151	56.4461	60.6976
ANAPC7	30.7078	27.619	27.7127	33.3768	25.0227	32.4423	30.4316	32.7321	25.7483	25.2433	42.3951	26.9128	26.9268	23.3503	25.9273	25.6974	33.8237	31.2958	34.328	32.099	25.2678	37.3641	33.179	32.2296	27.568	30.3592	27.2339	28.0607	27.0076	31.3561	26.4048	29.754	20.695	24.8513	26.3172	25.4628	26.1594	28.9175	24.4943	40.2857	39.6017	33.4484	35.9942
ANG	10.9046	11.4706	8.49868	10.8329	11.074	5.97323	10.3956	9.90989	8.21358	12.5772	5.58023	7.36206	11.0947	8.74625	8.97104	8.6165	5.76328	9.45791	5.66795	6.30958	8.6434	3.7678	8.89705	6.39109	8.81842	8.81716	7.1329	7.86601	5.30489	4.8133	8.33713	10.2084	9.32725	8.05949	5.20162	7.298	13.2026	11.0201	6.01154	6.62585	6.85239	7.66861	7.9571
ANGEL1	35.7812	38.4886	50.241	48.6153	45.8952	42.1333	42.2911	36.6438	36.8671	37.4759	29.472	30.2935	36.9874	30.4169	38.251	45.253	38.2584	40.8572	36.3531	33.5785	40.9597	41.4114	41.7965	23.9966	44.3481	35.7468	40.9029	33.8188	33.0982	34.045	28.9845	35.5123	38.5986	32.5852	34.9874	44.9872	40.9346	35.6582	39.3594	28.0968	26.9803	36.2829	36.5917
ANGEL2	16.293	27.1052	31.8596	28.1537	23.9766	28.3394	24.864	23.3973	22.7329	16.9857	18.5588	19.8704	20.7906	6.48168	24.9767	21.929	39.2928	28.9403	31.0984	19.4198	28.6624	25.8464	29.9659	13.1496	22.3473	31.9719	26.1106	37.6531	27.4194	33.9369	26.4678	26.0868	39.688	30.1305	25.9464	32.4768	31.9093	27.0328	28.1824	11.3723	15.9527	24.8683	27.851
ANGPT1	0.309086	5.99369	15.7094	8.04485	13.4927	2.07729	14.8147	4.31548	6.21878	3.71875	1.96399	6.26702	13.1501	0.533997	2.70417	6.12874	4.05284	12.9768	6.89813	3.65159	8.04174	5.48358	9.87907	1.73387	3.99004	7.88139	5.2087	25.3258	6.40083	26.9056	2.50567	8.75545	15.332	7.48902	0.46456	3.95598	6.69802	1.38458	6.70485	1.09406	4.13421	13.6944	5.83134
ANGPT2	11.122	4.29937	14.2233	5.82498	9.25445	9.69447	7.28045	8.16736	10.9422	4.92316	8.20714	7.55432	7.42521	6.52458	9.26212	9.32465	5.85648	7.45652	5.43125	9.3084	8.25639	6.58837	8.24978	4.92349	10.6314	6.14831	8.76979	5.42482	10.6111	12.0898	13.2897	10.7829	15.6639	5.00337	3.98613	13.1948	9.40097	8.25379	8.77445	8.45101	5.83265	9.23777	2.94294
ANGPT4	4.771	1.77565	11.4542	3.69824	4.48932	3.18281	9.37779	2.75579	2.74819	8.68841	4.94284	0.456275	5.8335	1.43546	4.06288	3.48289	4.85874	3.28362	11.3485	4.53801	3.60468	4.5186	5.66335	4.45793	9.9994	6.9451	17.6547	9.52711	3.1079	11.054	1.6048	6.90819	5.30334	3.12058	0.450443	10.9964	9.55047	3.33619	4.2397	3.85781	2.89197	5.28545	4.22147
ANGPTL1	74.8574	84.3517	81.9788	44.0315	78.8249	77.4279	224.215	98.0135	47.3219	60.7826	87.9049	30.1753	65.7719	26.8236	66.4517	68.6567	153.616	236.929	92.5691	68.1466	101.924	40.3626	111.649	78.6525	88.901	176.146	68.6615	236.744	106.193	188.944	126.87	85.8699	255.898	122.618	2.67197	89.1304	111.49	73.7646	184.632	29.2436	55.8681	132.507	143.865
ANGPTL2	47.1418	24.9893	119.733	84.3826	51.6989	59.9201	136.296	167.802	128.278	92.9967	104.653	48.6593	103.588	113.43	44.4272	129.09	70.2851	144.708	69.7724	85.6777	174.7	106.561	141.92	140.868	134.003	150.644	189.14	152.314	121.708	115.595	157.881	79.7863	150.169	122.762	11.0356	156.765	140.135	187.919	146.509	194.494	123.122	235.113	207.172
ANGPTL3	0.062284	0.0877038	0.153325	0.0165869	0.0367248	0.0333109	0.0633685	0.0813351	0.0795347	0.0344443	0.10033	0.101813	8.48689e-05	0.0176866	0.117886	0.079787	0.0796946	0.08611	0.0305983	0.0773598	0.0508967	0.096579	9.55554e-05	0.000121546	0.0463867	0.0392405	0.0353627	0.100934	0.0710553	0.150643	0.151906	0.0111501	0.108065	0.0366177	0.0570148	0.0356892	9.21523e-05	0.0871126	0.0561147	0.223287	0.104801	0.0990429	0.15352
ANGPTL4	0.91063	0.810693	3.49197	0.724053	1.08628	2.96595	2.88943	1.56169	5.95083	4.34051	1.82851	0.888754	2.45244	4.97914	0.49537	4.93627	2.11521	1.73297	2.66352	2.04343	2.6958	5.41891	9.73882	7.19856	2.47767	0.580967	4.08145	5.1091	2.96222	7.18677	4.21421	4.51823	2.74474	1.17995	1.54827	1.5567	1.49806	9.68504	1.92735	8.59484	12.4311	5.84155	1.88746
ANGPTL5	0.155572	0.24542	0.165112	0.346528	0.146644	0.0499185	0.101331	0.0610251	0.185462	0.0344443	0.0573748	0.0872795	0.137368	0.0352698	0.151543	0.0399383	0.0398956	0.0517049	0.0916147	0.0232753	0.152505	0.0690154	0.132166	0.320494	0.24699	0.137074	0.0882591	0.100934	0.11363	0.658712	0.118171	0.0774681	0.156046	0.0183604	0.235926	0.124669	0.0423778	0.116117	0.168139	0.223287	0.251375	0.0743098	0.0220239
ANGPTL6	0.32444	0.110687	0.0514949	0.0173697	0.05269	0.0352588	0.0270307	0.0638241	0.0551247	9.019e-05	0.0926318	0.335013	0.129445	0.000103314	0.0535066	0.0639845	0.0424169	0.0184038	0.032874	0.00826819	0.144013	0.0299501	9.55554e-05	0.120827	9.35412e-05	0.0409797	0.0915179	0.0179928	0.0918186	0.514178	0.255147	0.0832876	0.0380851	0.0948207	0.503084	0.0913708	0.158833	0.0647336	0.000102874	0.0205731	0.0469005	0.106595	0.0482356
ANGPTL7	0.388793	0.33304	1.15522	2.7716	0.256564	0.847081	3.29014	1.54366	0.662137	2.3877	0.272151	0.145415	0.472948	0.510017	0.807853	2.132	1.37316	2.56328	1.21025	0.409593	0.287984	1.35072	2.33964	1.10541	0.401301	1.42848	0.194052	7.63006	1.37669	3.19906	1.58566	1.3762	2.56709	0.493051	0.0651472	1.53055	0.232663	0.957244	0.952305	0.353483	2.4081	4.50153	2.95877
ANGPTL8	0.606466	0.33304	0.318344	0.214552	0.403123	0.481715	0.518912	0.365677	0.331113	0.532579	0.945116	0.407023	0.701753	0.703433	0.656397	0.358728	0.218991	0.206528	0.376358	0.672289	0.406528	0.48247	0.396308	0.608829	0.447594	0.176208	0.335109	0.201771	0.354888	0.113008	0.227811	0.436691	0.299989	0.56608	0.0488825	0.213649	0.35952	0.377156	0.336174	0.706871	0.816731	0.445306	0.285016
ANK1	0.404976	0.00641186	0.786048	0.221898	0.438399	0.128755	0.369512	0.0351942	0.509574	0.629876	0.470698	0.84611	1.08044	0.880442	0.345142	0.124054	0.243612	0.415357	0.679202	0.467292	0.423158	0.384401	0.402927	0.753567	0.617636	0.112623	0.475752	0.412106	0.362128	0.0234078	0.336768	0.514634	0.263237	0.0806444	0.196154	0.00978764	0.0142164	0.00983488	0.190405	0.27707	0.613555	0.000127989	0.044774
ANK2	22.4869	18.1009	22.8832	34.4238	33.6004	24.0432	43.6852	49.818	36.6109	36.6332	37.6785	20.5666	35.5864	11.4177	23.2772	26.556	36.7858	25.395	32.8987	44.3679	25.2	53.6005	44.6178	43.4342	44.0728	34.3518	35.0077	37.5627	30.9409	63.6167	18.5273	49.3649	31.729	32.0285	13.1798	25.8044	29.1522	41.72	45.5033	27.0243	41.1563	38.4501	16.532
ANK3	51.2173	62.1313	14.9615	22.8708	45.1104	48.6812	37.1555	35.0587	18.3781	26.2867	26.977	45.9149	30.9884	17.4733	51.4565	14.2312	69.8439	40.0483	30.327	19.6796	33.8004	38.1649	27.2766	26.3173	45.2532	22.2416	26.057	15.4316	27.715	16.6372	17.9527	19.6166	45.5607	41.0484	40.0729	38.6893	38.9188	47.1892	76.0126	23.1033	13.6627	15.1351	42.8385
ANKAR	1.96165	3.2304	4.38672	3.66041	5.54873	4.3732	3.16654	1.35345	3.09729	3.38987	2.23893	2.68461	3.93439	2.72512	4.83224	2.57882	3.66212	3.07271	2.86839	2.19547	3.73453	3.28415	3.47067	1.91266	3.56487	2.25541	3.49752	4.12389	3.29983	1.62588	2.56022	3.71364	5.59424	3.1604	2.4229	4.14422	4.32583	3.61139	3.69719	1.92036	0.988864	3.77848	3.21793
ANKDD1A	24.1773	21.1691	18.8358	22.5681	31.5714	21.8058	25.1056	26.2407	16.922	20.75	27.0046	17.9784	27.6397	20.7835	16.0881	17.5734	22.5064	29.5885	24.0406	21.1858	13.1076	12.6105	24.5653	22.4742	25.1836	25.5738	16.063	20.2178	21.4862	27.5111	12.634	25.8863	14.4664	17.1437	6.2457	17.6359	15.6246	15.2854	25.5789	11.3643	21.2952	24.4117	19.2643
ANKDD1B	0.948523	2.15554	1.00199	0.495002	0.928293	0.614575	1.45531	1.0156	1.07261	0.669996	1.31739	1.42439	0.778021	0.808932	1.43051	0.836914	0.756277	0.946237	1.16957	0.826817	0.59281	0.606506	0.792521	0.576792	0.98768	0.626243	0.987498	1.3782	0.80902	0.865703	0.522995	0.757228	1.31959	0.821682	13.7112	1.05006	0.761233	0.870231	0.52288	0.632474	1.04706	1.36043	1.05208
ANKEF1	1.03191	1.94368	0.807664	1.64668	2.47167	0.500683	1.25235	1.32887	1.89787	1.1593	1.87699	2.87066	1.30164	1.01732	1.64422	1.39736	2.33269	1.92944	0.509966	0.757827	0.643137	1.16301	0.582163	0.732499	1.15069	1.62745	0.033847	0.533385	1.74475	1.23618	0.858911	1.43538	0.657201	0.431691	14.8118	0.303789	1.56672	0.639372	1.02981	0.495023	0.610603	1.54995	0.928971
ANKFN1	0.0109941	0.100016	0.0611998	0.0342384	0.0507376	0.0603635	9.85261e-05	0.021153	0.157969	9.019e-05	0.0594845	0.693259	0.0632343	0.0247621	0.253088	0.039249	0.0104129	0.116033	0.0949863	0.0163494	0.0238417	0.0484254	0.0662443	0.000121546	0.0560917	0.0305383	0.0495531	0.095936	1.70249	0.0396886	0.106546	0.0373426	0.0249374	0.000103092	22.688	0.147446	0.0297429	0.772639	0.0773984	0.0343022	0.0734991	0.0257546	0.0454736
ANKFY1	35.5294	37.3707	56.9765	58.7304	48.6757	43.7765	60.7568	38.3408	40.0388	34.3995	45.8549	28.0351	41.2288	22.7932	40.9598	45.1255	54.8563	51.4278	44.3208	33.4514	46.35	56.619	55.5222	38.9113	41.9108	79.5251	54.1831	62.3629	53.564	49.5266	57.8873	37.4615	103.487	87.1606	41.345	73.3575	55.852	51.6295	78.6992	19.0943	38.5494	87.0492	122.352
ANKH	44.4167	70.7982	64.3169	51.6184	61.9758	60.2369	49.6728	49.6147	66.2341	40.6259	42.7053	66.1018	57.2631	38.7322	50.3209	44.3443	54.4872	54.2672	44.6981	52.8793	72.2124	64.4517	67.3882	47.3301	56.0385	47.1569	53.9821	55.9927	53.0101	83.5626	64.836	55.4019	63.1839	57.8793	61.509	55.5046	53.0319	54.7876	66.7383	46.6969	46.1504	56.0527	41.9708
ANKHD1	102.59	147.835	134.424	135.07	179.333	101.002	101.179	109.004	108.536	102.799	94.5829	119.989	153.018	86.3894	127.574	110.408	126.517	108.174	110.273	95.2262	135.005	114.977	123.469	71.0236	109.323	107.209	113.143	134.833	101.122	114.216	85.0278	93.7311	113.579	97.2093	109.927	102.284	139.957	113.445	106.061	86.3847	73.6607	93.7714	103.629
ANKHD1-EIF4EBP3	31.9247	34.4373	72.8832	38.2075	31.0567	57.8619	40.8278	44.1808	44.7723	24.0118	46.5199	45.1379	27.7874	27.3093	46.8614	40.3665	57.2713	51.3198	40.844	33.8915	68.0623	52.513	48.7123	29.5699	49.6555	45.0476	59.0778	59.0813	45.4099	43.3632	59.6906	45.4602	54.2377	36.4429	55.6501	55.2923	54.0169	76.6191	49.8787	56.0998	34.2663	57.8226	53.7587
ANKIB1	33.2574	48.1736	51.3209	50.1347	47.4608	54.2237	44.403	48.3584	46.8598	36.1235	48.5538	46.7117	43.5645	23.8078	46.1269	46.2247	69.0513	58.8844	48.4247	41.2125	62.371	56.4366	54.1491	33.7994	46.1544	47.6255	52.2441	76.098	51.3454	74.0276	64.4833	50.2123	63.2031	53.5715	48.491	46.8391	53.4491	60.6087	60.3831	50.7206	32.2673	62.5254	67.0851
ANKK1	1.24394	1.15667	0.801613	0.824943	0.696241	0.946726	0.784646	0.507847	0.940196	0.858943	0.787613	1.46799	0.915304	0.844099	1.86805	0.54801	0.378187	0.378553	0.51873	0.834543	1.33794	0.399779	0.45291	0.192345	0.725353	0.450142	0.67012	0.353025	0.36908	0.24473	0.329017	0.563801	0.467923	0.29222	6.87189	0.711937	0.507519	1.65335	0.616233	1.48805	0.565461	0.346374	0.438428
ANKLE1	1.48802	1.6983	1.47916	2.63784	1.82952	1.61088	0.704892	2.14994	1.36988	0.880295	2.66138	2.10146	2.20498	1.32745	1.69507	1.90577	1.30786	1.21244	1.23503	1.81621	1.46038	2.15517	1.96897	1.76221	1.5493	0.875815	1.90035	1.59728	1.31733	1.11262	1.00909	1.02693	0.67767	1.58362	1.41383	1.48815	1.10717	1.99655	1.14094	3.51915	1.71704	1.13427	1.19888
ANKLE2	60.9951	66.6439	70.6163	64.7181	63.0206	55.8845	60.0433	70.009	63.742	69.1034	67.2107	54.4292	66.4145	68.6099	60.246	70.1937	59.8777	54.3085	57.9555	66.8949	66.5369	65.505	65.9412	63.6741	62.002	62.7898	77.2289	54.5358	61.1944	63.2264	77.2877	59.8577	70.7482	66.4202	62.8873	72.7323	70.913	69.1465	74.3652	85.2225	84.6988	62.7727	65.7263
ANKMY1	2.51747	4.75514	4.58423	6.34622	8.78051	3.85853	3.71229	4.34065	7.76901	4.21978	5.16687	6.04068	2.45323	3.53776	6.15367	4.90033	7.22242	2.90767	5.85644	4.38263	4.76648	6.1467	5.29114	0.689069	1.65942	5.0612	6.12892	6.63043	4.30357	4.12373	5.16594	4.96328	5.3957	5.33831	14.0578	6.85995	7.118	2.81583	2.44221	1.99651	2.30289	5.34736	6.18721
ANKMY2	26.1208	31.0176	22.7609	31.8229	42.2091	23.6492	23.2708	33.329	23.3174	30.644	22.8809	25.1872	35.8156	25.6365	26.7405	22.5146	21.5711	23.2235	24.2745	26.0225	23.8782	25.9099	24.4898	22.0578	23.5942	22.2279	14.4232	27.5789	17.6119	28.0568	15.3497	25.9913	16.6495	25.3595	25.0964	14.4504	19.092	17.2287	15.8328	17.1301	22.1746	21.1964	27.1541
ANKRA2	23.7575	30.4042	19.6727	19.3512	32.0843	21.6231	21.3474	22.1381	16.2732	22.4677	17.669	23.0071	26.3279	11.9919	25.0408	17.9719	19.7205	20.884	18.244	17.5467	19.7461	18.8674	22.1503	12.799	18.1007	18.8429	17.1738	21.5287	18.9034	20.0782	15.1473	17.5578	19.8163	18.7321	27.0644	21.5332	26.5343	23.2036	24.5333	20.6826	14.7831	20.0339	19.1547
ANKRD1	9.18271e-05	0.0526558	0.0708159	8.98604e-05	0.0733646	9.58231e-05	0.113985	0.0813351	0.145739	0.0344443	0.0430564	0.755834	0.0763531	0.263852	0.0337442	0.0299761	0.0597951	0.0689075	0.0916147	0.278245	9.22969e-05	0.0276699	0.113299	0.160308	0.0926798	0.0979407	0.0353627	0.084128	0.354888	1.01624	0.303715	0.0277296	0.0121027	0.0183604	0.0407502	0.124669	9.21523e-05	0.116117	0.0561147	0.018694	0.0210443	0.39584	0.065856
ANKRD10	115.775	152.189	108.655	114.171	117.674	101.953	96.1328	124.038	108.944	115.977	94.4845	127.118	114.902	92.5502	115.831	110.107	98.5346	106.731	88.4369	103.902	122.352	94.4312	105.439	106.094	100.776	83.438	108.422	105.692	83.1374	92.3765	93.0045	98.9232	89.0937	104.842	74.0615	94.2989	124.17	166.997	117.549	212.216	107.976	87.5381	109.489
ANKRD11	37.9826	44.9201	61.3061	58.0806	50.3812	52.626	56.0886	47.9089	54.9677	43.8259	43.4052	48.1942	49.4469	31.819	60.5491	49.9377	61.9638	48.2717	52.2646	44.5009	55.2232	55.0197	56.4279	35.3795	52.3907	56.9436	62.0656	57.1778	47.3657	42.4725	57.1455	55.4825	64.3333	57.8714	61.5633	55.9217	62.7756	47.0838	51.0672	52.8718	48.1986	60.9741	59.3245
ANKRD12	17.9172	24.4904	24.666	24.1115	22.5754	24.732	20.8526	24.2853	21.5831	21.5941	22.0938	31.5402	22.5547	23.8693	25.8929	29.1958	23.7217	24.0993	21.6124	19.5237	26.7871	21.5379	22.6363	20.9554	24.7001	22.3287	19.6443	30.1269	22.0786	28.7012	25.6442	21.2954	33.8455	19.3548	17.6768	30.3838	22.5543	25.9623	30.6687	22.5685	21.3824	26.5948	23.4803
ANKRD13A	47.8259	52.2742	56.4483	57.8883	59.8207	54.888	55.0703	53.1516	50.8056	50.3289	43.5137	58.1353	53.8302	47.3342	46.5139	52.6802	50.4254	61.3272	47.8268	52.1067	53.2939	55.1549	57.8094	59.4452	45.568	60.794	45.7203	64.7035	60.9532	75.3448	60.3779	50.4903	52.7673	59.8476	53.6002	48.1916	51.504	56.9937	54.9664	54.2359	55.0909	68.4613	72.2353
ANKRD13B	16.9475	14.7728	12.5062	15.7218	9.57529	19.7963	15.6531	17.3246	29.1037	20.6126	23.9691	16.0163	13.103	24.3529	22.3988	15.1227	14.6262	14.6223	21.3558	20.4054	22.1677	15.5736	18.8862	20.536	16.8199	15.0274	19.0604	12.7895	18.5769	12.8147	19.2039	17.7844	9.62031	19.3711	14.8497	14.2191	14.9692	16.9967	9.5968	26.8576	23.5775	23.6697	19.9218
ANKRD13C	27.3491	35.4161	32.0962	29.3814	33.4767	29.7608	29.1296	30.8308	27.912	25.4393	30.4553	25.6086	29.9735	20.5725	26.9929	29.0299	36.1376	33.8891	29.5321	27.6141	35.9188	35.6674	31.0933	29.8909	31.1708	31.6395	32.7254	38.9062	34.9825	41.7746	33.6595	30.9927	39.1526	36.1496	25.9096	30.9473	29.5154	32.9781	37.3787	34.688	25.1689	33.0435	33.4659
ANKRD13D	36.9425	23.4387	22.6473	33.7494	27.3731	25.661	22.5624	27.4523	27.5261	35.7	28.8462	28.3534	34.4316	45.0927	25.7744	30.1377	22.4847	24.9319	27.32	30.4201	21.784	21.6002	31.1276	40.2315	20.2715	29.375	22.6955	19.2721	21.149	19.0044	26.1604	22.1482	17.0745	26.6419	29.6869	25.6485	21.3576	17.6894	15.6904	33.306	43.0866	27.0448	31.1382
ANKRD16	11.782	13.4113	11.6767	13.506	13.2334	11.0788	11.014	14.7398	10.7572	11.5442	13.8435	13.1446	14.121	11.9638	12.7204	9.74649	12.2182	11.8689	11.9638	11.6825	13.0984	11.0654	9.78839	10.8538	10.4758	9.20414	13.3764	10.7655	10.3898	10.7099	11.7048	9.91277	8.38165	10.2622	13.8718	11.1234	15.6708	20.851	11.3453	18.5996	13.3664	9.98578	13.1891
ANKRD17	31.1596	54.0701	69.4661	62.0268	64.2465	59.5419	49.0762	35.1238	57.241	33.255	46.2198	43.6518	36.0397	9.64356	57.0225	46.8375	87.9515	71.978	53.803	43.7879	63.2563	74.1714	62.515	12.4109	60.1546	67.9985	67.6143	83.3564	63.2226	69.0551	64.2022	60.6398	90.4736	59.6349	91.6862	65.0166	57.9118	80.1846	63.8524	39.7106	31.0651	70.1003	59.9378
ANKRD18A	0.0311879	0.770601	0.00122456	0.033084	0.149876	9.58231e-05	9.85261e-05	9.47635e-05	0.236445	9.019e-05	0.0035135	1.45209	0.66124	0.000103314	0.234361	0.00964862	0.139393	0.00669991	0.00476389	0.0112614	0.101655	0.00142871	0.0109579	0.000121546	0.0309556	0.000107019	0.00348214	0.00171026	0.658475	0.00371551	0.463248	0.000627341	0.0480885	0.000103092	6.80877	0.00692762	9.21523e-05	0.929841	0.00726896	0.0211676	0.000105181	0.000110453	0.00010788
ANKRD18B	0.0311879	0.0351318	9.35396e-05	8.98604e-05	8.4978e-05	0.066526	0.0127525	9.47635e-05	0.0265709	9.019e-05	0.0361308	0.0154449	8.48689e-05	0.000103314	0.0182348	8.94826e-05	9.66493e-05	9.72975e-05	0.0123976	0.0584682	0.0508967	0.000106291	0.0189628	0.000121546	9.35412e-05	0.000107019	9.8385e-05	9.76526e-05	9.712e-05	0.00010431	0.126605	9.70507e-05	0.0121027	0.000103092	0.669589	9.72288e-05	9.21523e-05	0.406161	0.000102874	0.0222711	0.000105181	0.000110453	0.00010788
ANKRD18CP	0.0315419	0.176047	0.0594195	0.116207	0.198785	0.217419	0.191692	0.142904	0.0667487	0.035049	0.258886	0.219005	0.249801	0.000103314	0.0678494	0.0704864	0.0200582	0.225765	0.123185	0.195334	0.0340753	0.432225	0.24681	0.178672	0.0467617	0.0393423	0.0178322	9.76526e-05	0.0569227	0.0189603	0.109968	0.0555756	0.0121654	0.0368795	1.33484	0.25115	0.106547	0.0583155	0.113498	0.228527	0.149583	0.198942	0.044459
ANKRD19P	1.91276	1.62986	1.79176	2.04582	2.07638	1.06304	1.27818	1.58428	1.17853	1.70071	1.17426	0.901172	1.58652	2.11029	1.54846	1.04618	1.27372	1.61724	1.1391	1.63044	1.08395	0.882188	1.15103	1.76217	1.49691	1.64371	0.969866	0.823595	1.1639	1.22329	1.34958	1.33201	1.52359	1.89925	1.0492	1.38831	1.05723	1.33438	1.75556	1.17213	1.69651	0.791686	1.11799
ANKRD2	0.00150871	0.000311963	0.306546	0.00073416	0.0367235	0.0831307	0.0757737	0.00035917	0.119253	0.000537428	0.000660352	0.000833458	0.00127634	0.0704324	0.033743	0.000608252	9.66493e-05	0.0018889	0.233978	0.0464527	0.101368	0.000107398	0.0736298	0.000955697	0.000101211	0.00163539	0.000557472	0.890787	0.00249891	0.0565544	0.077197	0.0111497	0.87427	0.000103092	0.000110356	0.189968	9.21523e-05	9.95428e-05	0.00156125	0.0930883	0.104797	0.17122	0.350752
ANKRD20A1	0.279811	0.164357	0.104696	0.503374	0.0958346	0.185314	0.105839	0.558616	1.47614	0.138492	0.776898	0.165733	0.0884569	0.0720554	0.0585179	0.156032	0.163558	0.249243	0.556388	0.0519421	0.467479	0.558104	0.150468	0.000121546	0.195843	0.185424	0.798198	0.724553	0.292879	0.740299	0.314784	0.237938	0.274932	1.44834	1.23728	0.733883	0.0635206	0.661571	0.0747854	0.324111	0.188715	0.0935102	0.162535
ANKRD20A11P	9.18271e-05	0.0176078	9.35396e-05	0.033084	8.4978e-05	9.58231e-05	0.0863683	9.47635e-05	0.119258	0.0344443	0.000101141	0.0291442	0.0305922	0.263852	0.0505726	8.94826e-05	0.0597951	9.72975e-05	0.0407677	0.0155489	0.0170271	0.000106291	9.55554e-05	0.000121546	9.35412e-05	0.0588072	0.0882591	0.0169037	0.0284804	0.00010431	0.00853101	0.0277296	0.192032	0.0183604	0.0488825	0.0178932	9.21523e-05	9.95428e-05	0.000102874	9.46079e-05	0.000105181	0.173242	0.00010788
ANKRD20A19P	0.140024	0.175324	0.0590288	0.0165869	0.158857	0.0167034	0.101331	9.47635e-05	0.0662938	0.0516214	0.0144195	0.101813	0.0610995	0.000103314	0.151543	0.0200139	0.0398956	9.72975e-05	9.00623e-05	0.038728	0.525071	0.000106291	0.0378301	0.000121546	0.0309556	0.000107019	0.581959	0.0169037	0.0284804	0.037739	0.00853101	0.0443091	0.024098	0.0731323	1.20367	0.320425	0.444091	0.638196	0.000102874	0.334884	0.0210443	0.0495767	0.065856
ANKRD20A4-ANKRD20A20P	0.934937	0.0843497	0.579088	1.33673	1.94294	0.460942	0.181521	0.222709	1.21115	0.904967	0.254029	0.307675	1.50998	0.0674775	0.783665	0.135128	0.646025	1.28434	0.0731317	0.484694	0.745578	0.0515054	1.71257	0.0216386	1.043	0.633252	1.17932	1.06768	1.02285	0.342833	1.0247	0.801315	0.140684	1.01576	1.29241	0.229123	9.21523e-05	1.0685	0.000102874	0.0330136	0.434804	0.831421	0.0764148
ANKRD20A5P	0.0311879	0.543328	0.247622	0.198055	0.110004	0.0485422	0.0656767	0.121955	0.305321	0.0172673	0.0430564	0.825335	0.197072	0.140769	0.334877	0.196576	0.516629	0.361351	0.334245	0.16942	0.101701	0.329525	0.603848	0.0161402	0.0309556	0.390349	0.352741	0.313824	0.156205	0.131826	0.00853101	0.152089	0.261931	0.127904	0.440739	0.231445	0.525552	0.174126	0.280162	0.316284	0.230435	0.0248436	0.109688
ANKRD20A8P	0.0513229	8.38274e-05	9.35396e-05	8.98604e-05	8.4978e-05	0.0236094	0.0145393	0.025673	0.0460336	9.019e-05	0.000101141	7.66278e-05	8.48689e-05	0.000103314	8.72566e-05	8.94826e-05	9.66493e-05	9.72975e-05	9.00623e-05	0.00907339	0.0208192	0.000106291	9.55554e-05	0.000121546	0.0181737	0.000107019	0.0196411	0.10229	0.0182756	0.0213023	0.0214814	9.70507e-05	0.0148067	0.0430549	0.0900492	0.0207388	9.21523e-05	9.95428e-05	0.000102874	9.46079e-05	0.0501245	0.0304962	0.0288238
ANKRD20A9P	9.18271e-05	8.38274e-05	0.0354547	8.98604e-05	8.4978e-05	0.0512947	0.0507145	9.47635e-05	0.246225	9.019e-05	0.0573748	0.0904481	0.0166484	0.0352698	0.0355238	0.0825443	0.0208511	0.090773	0.0227998	0.0141646	0.0339619	0.0152332	0.0378301	0.000121546	0.0309556	0.0207664	9.8385e-05	0.0561051	0.0142888	0.00010431	0.00853101	0.0194268	0.150516	0.000103092	0.147163	9.72288e-05	0.0243454	9.95428e-05	0.0374441	0.0372934	0.0210443	0.0248436	0.0439399
ANKRD22	0.373245	0.876284	0.471576	0.0660781	0.0977911	1.07959	0.265832	0.812499	0.595932	0.343631	0.0144195	1.00291	8.48689e-05	1.52985	0.84151	0.288993	0.457785	0.22373	0.101784	1.41402	0.271049	0.082793	0.207635	0.272438	0.138973	0.0783739	0.793545	0.100934	1.57537	0.150643	0.565164	0.116154	0.80379	0.164419	0.553086	1.58394	2.15666	0.290143	0.317503	0.0372934	0.209496	1.01417	0.131604
ANKRD23	7.94514	9.41047	7.21377	9.89833	9.84398	5.23147	8.73136	4.65111	5.74666	7.12857	4.09516	7.15071	8.19129	4.69483	10.6357	6.06707	6.22864	7.29398	6.2136	4.88316	7.09577	4.61701	5.3584	4.35719	3.99673	5.67446	6.89427	6.84017	4.59819	3.08615	5.03509	4.57052	6.20166	6.59099	8.56341	11.3361	10.8041	6.14903	7.16962	7.81184	4.89986	9.00296	7.62688
ANKRD24	3.5295	4.9068	3.53621	1.46833	2.36946	4.58378	2.88521	1.50304	2.23781	2.95455	2.41991	5.05784	3.98129	2.42659	9.13794	2.75962	2.96512	2.82131	2.08482	1.93169	2.32016	0.895924	1.18873	2.35486	1.75923	2.07418	2.64492	2.10086	2.07208	1.58076	3.4664	2.5644	2.21923	2.37355	6.18878	1.92206	2.28351	2.34945	2.87538	2.26922	1.98932	1.23677	2.19171
ANKRD26	7.86966	10.8763	6.96454	5.99104	6.6926	7.00815	3.99863	7.82118	5.95227	6.10332	7.40368	9.08477	6.69285	4.27869	6.01804	6.25557	7.45382	9.42546	8.72089	5.51068	11.6554	6.5265	5.46558	4.30514	6.97361	5.6027	9.54409	10.7007	5.11581	7.371	6.9871	5.52691	8.4919	6.71832	7.51395	7.08035	6.69681	7.13832	7.25311	4.33277	2.39079	7.54556	4.58288
ANKRD26P1	9.18271e-05	8.38274e-05	0.0118806	0.0165869	8.4978e-05	9.58231e-05	0.0380605	9.47635e-05	0.0662938	0.171861	0.0144195	0.043678	8.48689e-05	0.000103314	0.488112	0.0100517	9.66493e-05	9.72975e-05	0.0305983	0.0310016	9.22969e-05	0.000106291	0.0944319	0.000121546	9.35412e-05	0.0392405	0.070627	9.76526e-05	9.712e-05	0.037739	0.00853101	0.0664151	0.000107459	0.000103092	0.0163533	0.0890772	9.21523e-05	0.6672	0.149468	0.13029	0.000105181	0.000110453	0.00010788
ANKRD27	29.6036	27.6004	38.9563	34.413	27.541	39.0278	39.4426	32.9025	32.9303	32.104	41.2085	22.324	25.8703	28.7663	32.6473	37.3982	38.9832	35.5234	36.8032	35.4409	45.3007	62.1009	38.6969	40.1268	34.8434	53.0847	33.5893	55.5442	41.1416	45.8015	43.7042	44.9195	58.1771	47.9256	28.6909	40.2724	32.1583	35.1824	42.8305	33.9812	46.5687	40.0183	52.0945
ANKRD28	49.3538	50.9206	30.8831	31.2696	37.9439	33.2064	26.6932	36.6775	26.7942	32.17	25.5214	40.6252	33.1305	30.8766	32.5241	32.7516	29.2263	29.3254	32.9313	26.1904	41.0196	26.2026	26.6226	33.2904	33.8651	26.8114	39.4526	28.5216	28.472	22.3248	24.5926	26.0796	31.6032	19.774	23.6469	42.4386	34.8871	32.2306	29.7188	38.2245	24.7735	19.9782	22.8352
ANKRD29	43.0326	29.6108	41.8163	33.2177	49.5087	42.4939	40.4419	38.8468	32.7206	35.3138	41.5387	25.2607	44.4123	30.8697	37.2342	38.8507	46.2369	34.7886	44.1975	46.8642	37.8884	37.5491	40.1943	33.0157	41.4522	39.2612	42.1887	46.1768	34.4252	55.3325	18.9677	38.5435	45.3794	44.1331	9.87501	40.7627	44.4024	27.7265	36.5253	28.1656	28.0505	36.8156	40.2145
ANKRD30BL	0.0403703	0.259947	9.35396e-05	0.036732	8.4978e-05	9.58231e-05	0.11897	0.108698	0.237875	0.223311	0.0762033	1.10854	0.207302	0.140769	0.384375	0.0601677	0.0796946	0.16874	0.03594	0.141636	0.0907316	0.07914	9.55554e-05	0.000121546	9.35412e-05	0.000107019	9.8385e-05	9.76526e-05	0.141203	0.100847	9.71798e-05	9.70507e-05	0.000107459	0.000103092	1.36489	9.72288e-05	0.021235	9.95428e-05	0.0187735	0.164001	0.000105181	0.314845	0.0569489
ANKRD30BP2	0.0191933	8.38274e-05	9.35396e-05	8.98604e-05	0.04688	9.58231e-05	9.85264e-05	9.47635e-05	0.0148198	9.019e-05	0.000101141	0.0545659	8.48689e-05	0.000103314	0.0248143	0.0259851	9.66493e-05	9.72975e-05	9.00623e-05	0.00941791	9.22969e-05	0.000106291	0.0219655	0.000121546	9.35412e-05	0.0196738	0.0421653	0.0169037	9.712e-05	0.00010431	9.71798e-05	9.70507e-05	0.000107459	0.000103092	0.173166	9.72288e-05	9.21523e-05	9.95428e-05	0.000102874	9.46079e-05	0.000105181	0.0359005	0.00010788
ANKRD31	0.350764	0.0335186	0.0391195	0.510442	0.556699	0.41052	0.100883	0.404874	0.211202	0.178106	0.0545035	0.0529274	0.858996	0.210363	0.523296	0.253338	0.0597931	0.61824	0.291943	0.258792	0.324101	0.272787	0.000902946	0.0407702	0.381443	0.123199	0.309337	0.00852233	0.305563	0.21012	0.134566	0.00559447	0.392174	0.334861	0.901775	0.0845315	0.488887	0.185077	0.178713	0.133541	0.356067	0.236717	0.314593
ANKRD33	0.0869274	0.157775	0.138766	0.0749507	0.109215	0.0603855	0.00353216	0.000109485	9.14463e-05	0.140394	0.000103735	0.145171	8.4873e-05	0.143725	0.244237	0.0599548	9.66493e-05	0.0313221	0.124707	0.141345	0.107678	0.000973512	9.55813e-05	0.0873492	0.0421074	0.0178651	0.0481052	9.76535e-05	0.000145055	0.00010772	0.000101765	0.105365	0.000122675	0.049812	9.74973e-05	0.0485501	0.0767777	0.155925	0.0170477	0.270177	0.000105181	0.000119417	0.000119795
ANKRD33B	45.2449	61.6846	170.559	35.6338	57.1948	45.6376	70.7613	56.2388	31.9505	58.8659	11.1685	27.3236	53.4641	24.6518	85.4886	61.6362	34.466	79.3898	29.9693	17.1835	90.9569	15.9457	45.3004	13.696	30.3684	65.8813	36.6044	76.9383	33.8755	22.1105	93.6241	20.9345	55.5862	23.8259	75.8502	110.905	131.339	30.0776	64.7312	33.9068	30.2571	62.4265	49.1358
ANKRD34A	1.80367	1.85763	3.94876	4.02538	2.28397	2.93963	1.96147	2.35607	3.68107	2.04416	3.02128	1.38079	2.33389	2.95409	2.15413	2.61018	6.64653	3.25138	3.60006	3.62376	2.28629	2.63243	2.50944	3.89265	1.66665	3.69822	2.69782	3.79827	2.31333	2.74744	2.53025	2.89046	2.26721	4.29057	0.634409	2.38476	3.89037	1.82737	1.68046	2.54821	2.24059	1.85509	3.37518
ANKRD34B	9.18271e-05	8.38274e-05	9.35396e-05	0.033084	0.0367248	9.58231e-05	9.85261e-05	9.47635e-05	0.0265709	9.019e-05	0.000101141	0.101813	0.0763531	0.000103314	0.0169157	0.0399383	9.66493e-05	9.72975e-05	9.00623e-05	9.61919e-05	9.22969e-05	0.0276699	9.55554e-05	0.0161402	9.35412e-05	0.0196738	0.0177305	9.76526e-05	0.0142888	0.00010431	0.354318	0.0166766	0.024098	0.000103092	0.0244856	9.72288e-05	9.21523e-05	9.95428e-05	0.000102874	0.0372934	0.000105181	0.0248436	0.0220239
ANKRD34C	0.0311879	0.227896	0.106177	0.0990723	0.0367248	0.0499185	0.0127525	0.142265	0.278149	0.0172673	0.0144195	0.189016	0.0458458	0.0704363	8.72566e-05	0.0997114	0.0398956	0.0345024	0.0305983	0.0696334	0.0508967	0.0276699	0.0378301	0.0161402	0.0772488	0.0783739	9.8385e-05	0.0169037	0.0710553	0.24473	0.0675678	0.110627	0.0121027	0.0366177	0.00822097	0.0356892	0.0423778	0.261139	0.0187735	9.46079e-05	0.0629225	0.0743098	0.0220239
ANKRD35	15.1162	11.9975	8.59823	19.1484	19.541	7.419	11.3215	11.1496	14.8475	14.3199	16.2277	9.22949	20.5763	23.2003	10.5773	8.15507	9.26764	13.211	11.1161	13.1704	7.23364	6.42933	11.0922	13.5235	7.83046	12.9778	6.11812	9.22559	5.95409	7.98053	6.2757	12.0691	5.95252	11.29	3.25644	5.39456	8.4119	3.20157	5.41957	7.43916	12.9933	9.13232	11.3039
ANKRD36	11.0326	17.3239	13.1237	17.2696	22.6941	10.7239	11.7976	11.1312	12.857	11.3294	8.24338	13.88	13.7932	5.87719	17.1508	9.42446	15.7228	9.44239	12.5775	11.4231	9.94576	9.62326	9.41504	4.56976	8.74598	7.21409	11.136	18.2608	11.2291	13.0534	14.9365	10.5007	22.0448	9.34049	14.8581	12.0908	12.8719	12.053	5.3718	6.45272	7.71342	10.1941	11.4546
ANKRD36B	29.781	38.481	24.5178	24.2719	42.3393	27.4931	22.5595	46.0642	18.9537	33.5208	24.6598	29.3993	47.4503	28.9423	41.7561	30.912	29.825	20.5706	23.0271	25.8156	21.6083	22.1266	24.0128	20.2273	26.5001	24.2621	23.2642	14.8171	21.9029	32.2681	14.1536	19.816	17.9846	24.7277	33.1361	19.304	24.0032	17.8931	22.5402	13.0291	19.733	27.6001	29.074
ANKRD36BP2	0.466533	0.315516	0.165112	0.412517	0.503695	0.199386	0.202563	0.203196	0.185462	0.171861	0.37238	11.5521	0.991572	0.0880195	0.353485	0.414991	0.358288	0.309743	0.187983	0.170076	0.186375	0.446581	0.0755646	0.192345	0.248485	0.274041	0.105891	0.134546	0.227163	0.190626	0.26998	0.353793	0.0960696	0.127904	9.98298	0.213649	0.169235	0.319148	0.234713	0.279085	0.188557	0.173242	0.0717937
ANKRD36C	4.4491	6.08321	5.40287	4.67696	7.27277	3.2212	2.96068	3.85186	3.97815	3.86562	3.55714	4.04472	6.12845	2.34245	5.12251	4.10271	4.4079	2.76945	3.16072	3.63814	2.4686	3.22605	2.81466	1.98645	3.54165	2.7822	2.88753	4.33962	3.83329	6.32839	5.28139	3.86714	5.14507	4.08307	6.29242	2.1228	3.98532	4.13433	2.8165	1.42298	2.57383	5.1724	3.41937
ANKRD37	2.2344	1.22621	1.78521	1.49679	1.29033	1.02676	2.41953	1.67748	3.78064	3.45391	12.1906	3.44326	3.23486	5.91638	1.17666	4.72591	0.781696	0.410819	0.900615	0.778565	2.00577	3.84227	1.18977	10.1462	1.65861	1.84468	3.01422	0.996234	2.92244	3.86835	1.12778	0.494343	4.66365	0.727507	8.18504	3.81337	0.915706	5.10592	8.64365	1.19133	1.35977	2.9532	1.72848
ANKRD39	8.6759	6.78187	6.11757	7.72072	7.10821	5.63005	9.69306	6.88522	6.01148	8.72604	6.3002	6.56936	6.84897	10.7259	8.64991	6.00729	5.17396	5.98658	6.2136	5.70215	7.0619	6.27083	6.81118	9.67537	4.62941	7.84637	5.28974	4.68899	4.85364	4.30928	6.19053	5.76977	6.11769	6.48145	8.05921	9.84128	8.66864	5.51093	7.56171	9.33699	7.91509	8.75563	8.04329
ANKRD40	76.0456	77.0882	94.9802	94.6273	84.1129	102.751	89.5145	96.1887	81.9351	71.9892	101.417	52.3363	75.4904	86.3514	71.1676	100.568	97.4877	87.2686	86.0028	86.5585	93.4802	129.246	109.562	96.1759	93.8363	102.608	105.652	103.946	98.5184	113.713	93.2277	92.4917	114.963	101.547	41.1415	120.497	90.8719	81.9664	106.796	70.6778	87.8187	99.2788	106.994
ANKRD42	0.991453	4.2001	6.13007	4.3209	1.68173	4.8714	3.26859	1.83757	4.6032	0.395383	1.27598	4.80221	2.30895	0.0127955	4.59898	3.55992	5.24852	3.20494	2.74875	1.56911	4.75377	5.07003	3.09366	0.135991	4.24426	6.1038	7.29025	5.25696	3.59157	1.27981	5.70494	4.58349	9.29939	5.51732	19.9947	6.32109	7.14948	8.11838	6.38832	1.47976	1.97855	8.06142	4.85716
ANKRD44	9.1809	4.62968	14.3588	9.09269	11.6091	10.711	11.8203	9.8713	7.56898	14.8269	8.56036	6.82284	9.66817	8.06779	4.22847	9.323	10.5052	12.0078	7.23565	10.5163	8.78293	10.0508	12.3636	13.6245	13.8615	16.927	17.6145	7.20127	9.06769	14.9097	13.1824	11.3509	14.4743	10.7765	1.07007	9.40413	10.8911	10.8016	11.5904	9.12093	8.3014	10.6019	8.92768
ANKRD44-AS1	0.046736	0.0176078	0.0118806	0.0165869	0.0367248	0.066526	0.0127525	9.47635e-05	8.90469e-05	0.0516214	0.0287379	0.145415	8.48689e-05	0.299018	0.0169157	0.0200139	0.0199961	0.0172998	0.0712759	0.0541807	0.101701	0.0276699	0.0378301	0.0802146	0.0463867	0.0196738	0.0882591	9.76526e-05	0.0568637	0.00010431	0.0338325	0.0719416	0.0360932	0.000103092	8.52275	0.0356892	0.021235	0.435165	0.0374441	9.46079e-05	0.0838616	0.0248436	0.00010788
ANKRD45	1.05695	0.944119	1.55314	1.72234	1.59263	2.63791	0.939073	1.85838	1.2088	1.05692	3.08301	1.4361	1.10374	0.673716	3.02685	1.15945	3.67484	1.72035	1.66708	0.992136	1.76241	4.14511	1.50891	0.927762	1.67943	1.86447	2.06289	1.31287	1.11868	1.69011	1.2183	1.81667	3.52626	2.54145	23.957	0.751736	0.909149	1.37854	2.0712	1.07719	1.03415	2.19922	2.27892
ANKRD46	23.0979	28.4891	19.1938	19.4175	23.1991	19.3801	18.7577	20.4624	17.2626	19.2122	27.3582	16.4173	23.9902	14.1856	17.4376	20.2169	20.001	18.9281	18.634	21.3176	20.0378	17.78	20.8048	15.3164	23.9292	21.1628	18.3149	28.1773	16.6695	27.4432	15.1618	24.4921	24.5398	21.0138	11.8012	21.3011	18.3997	21.5521	21.8549	24.2311	17.1326	15.6883	20.2384
ANKRD49	21.332	24.7965	17.2092	18.0149	24.3045	18.4511	20.2338	25.5299	15.4258	20.7328	16.9531	21.7136	21.3399	16.7569	21.9612	17.0354	20.6956	21.9161	18.8033	18.2111	16.376	13.5752	18.924	15.5222	21.7579	19.7821	17.0151	23.7975	18.435	16.39	19.2208	16.2425	19.7323	20.6856	14.7196	20.6256	20.6566	14.7343	18.428	22.2078	13.4849	13.9496	19.0232
ANKRD50	15.5943	14.0827	11.9933	22.505	16.2135	17.7254	17.9023	24.4661	17.9929	15.0382	20.6532	14.8502	14.9894	14.5272	12.0461	15.6778	22.7773	19.1592	18.1957	22.9781	19.1553	22.1554	20.7267	19.2396	22.6286	17.8897	17.9614	20.384	20.3912	41.2914	15.39	18.9327	16.7623	24.2823	3.76532	16.1526	11.7818	11.3941	11.8438	27.0165	17.0211	15.8107	20.582
ANKRD52	82.4669	84.974	94.3319	118.119	100.992	100.642	98.309	85.7899	92.6735	79.5471	87.2851	74.98	94.0541	52.3278	108.359	97.1614	114.323	97.8482	99.1111	96.3864	94.0221	113.466	112.374	69.4088	89.0835	104.897	108.455	95.2065	97.2837	81.0653	96.5253	92.7514	90.6723	102.953	76.9805	96.2764	103.515	97.7448	102.371	95.7684	94.9799	117.829	126.236
ANKRD53	0.446757	0.689906	0.72262	0.94501	1.27961	0.18527	1.08118	3.20509	1.10942	2.17234	1.21684	0.647976	1.38347	3.67743	0.338723	1.96641	0.627219	0.661444	0.983199	1.17528	1.30042	0.697356	1.10533	0.611733	0.544016	0.736919	1.08785	0.62851	0.224469	1.45622	0.446058	0.719706	0.397399	0.754537	3.52111	0.4878	1.99129	1.46574	0.00690586	2.35669	0.394887	1.61577	1.26484
ANKRD54	8.9609	7.82105	14.5032	15.0475	8.20763	6.0887	12.7798	9.89568	9.34038	9.30747	15.1867	6.24867	7.70648	10.755	9.53732	13.4804	10.2091	10.3624	11.1776	10.7635	6.01041	12.5383	10.7741	10.7408	7.48286	16.755	12.3862	9.53242	13.5009	10.206	14.1094	13.3092	12.1091	13.7319	21.2424	13.4551	11.6529	12.8415	11.3407	11.5659	18.5306	13.0322	14.0945
ANKRD55	9.18271e-05	0.140276	0.212261	0.0165869	0.0977911	0.0499185	0.215216	0.101645	0.01333	0.137507	0.10033	0.0872795	0.10686	0.158352	0.101058	0.308918	9.66493e-05	0.0689075	0.0305983	0.301424	0.0678315	0.0414517	0.113299	0.0321588	0.262421	0.0588072	0.123523	0.353025	0.212972	0.0753737	0.0338325	0.0387826	0.0960696	0.0366177	0.0814118	0.195853	0.21152	0.377156	0.168139	0.14889	0.12574	0.222708	0.00010788
ANKRD6	8.60978	14.4568	17.2673	19.0231	20.179	10.8899	13.0218	16.9095	14.0548	16.8013	11.5007	10.1406	13.4657	5.21218	14.1397	13.3133	8.14705	11.53	10.977	7.63491	12.9309	8.71569	16.4591	6.08128	12.5035	9.03805	13.5143	7.54541	12.1545	18.6956	7.38264	13.1163	11.9556	14.1642	64.013	12.7661	15.844	11.1193	12.8591	3.92407	13.387	19.0697	12.745
ANKRD61	0.326601	0.368088	0.801613	0.577487	0.403123	0.564752	0.392372	0.446917	0.357595	0.274923	0.171922	0.50876	0.39668	0.0880195	0.555426	0.468313	0.975172	0.412958	0.650932	0.255066	0.796028	0.385997	0.584981	0.224382	0.432163	0.293608	0.42327	0.689147	0.440038	0.489356	0.539862	0.508536	0.647852	0.273963	0.422969	0.409405	0.930375	0.493174	0.672245	0.0930916	0.230435	0.494772	0.416512
ANKRD62P1-PARP4P3	9.18271e-05	0.0176078	0.0354547	0.0165869	0.195497	0.0167034	0.0633685	9.47635e-05	0.0928398	0.0688655	0.143411	0.0872795	0.0305922	0.0352698	0.0674011	0.0499004	0.0598609	9.72975e-05	0.142543	0.015564	9.22969e-05	0.000106291	0.113299	0.000121546	0.0619297	0.0588072	0.123874	0.0169037	0.0710553	0.037739	0.0422975	0.0830736	0.192032	0.146162	8.86552e-05	9.72288e-05	0.0847453	0.116255	0.0374771	0.0559645	0.0419834	0.173242	0.00010788
ANKRD63	0.0311879	0.0701798	0.0354547	0.115569	0.134431	0.166171	0.0507145	0.0813351	0.0530528	0.189038	0.18624	0.276219	0.289904	0.105603	0.319828	0.0897492	0.27869	0.240933	0.0509371	0.0928125	0.0678315	0.0138881	0.0189628	0.0161402	0.0309556	0.215341	0.0353627	0.0505159	0.042672	0.00010431	0.0760017	0.210104	0.072079	0.109647	0.130206	0.0534852	0.105806	9.95428e-05	0.0187735	9.46079e-05	0.0838616	0.0990429	0.065856
ANKRD65	0.212848	1.28471	3.76752	1.9551	1.17552	3.50134	3.1348	4.05545	3.05656	1.90936	2.11719	3.35976	0.165565	2.00025	0.893174	0.113563	0.918142	1.18559	0.348292	1.48736	2.03134	1.11132	4.13629	9.2751	2.44672	3.93364	0.45705	0.72739	2.22684	2.11183	5.58243	1.25245	0.143888	1.30739	40.1148	1.64879	2.25769	0.0168283	1.5369	0.240928	4.48046	2.50954	3.83835
ANKRD66	9.18271e-05	0.0176078	9.35396e-05	8.98604e-05	0.0122982	9.58231e-05	9.85261e-05	9.47635e-05	0.01333	9.019e-05	0.0144195	0.0582118	8.48689e-05	0.0704363	0.117886	8.94826e-05	0.0199961	0.0172998	0.0611065	9.61919e-05	0.0508967	0.000106291	9.55554e-05	0.0161402	9.35412e-05	0.000107019	9.8385e-05	9.76526e-05	0.0710553	0.00010431	0.0844355	0.0111501	0.0121027	0.000103092	35.7579	0.142465	0.0423778	0.290143	0.000102874	0.0372934	0.000105181	0.000110453	0.00010788
ANKRD7	0.0311879	0.0176078	0.0590288	0.198055	0.146644	0.149564	0.0507145	0.162576	0.01333	0.0172673	0.143285	0.101813	0.0458458	0.000103314	0.0842295	0.0499004	0.179192	0.0172998	0.0509371	0.115992	0.0508967	0.0827972	0.0378301	0.064196	0.0463867	0.117507	9.8385e-05	0.0337098	9.712e-05	0.0189217	0.0169648	0.127207	0.0360932	0.146162	0.113941	0.0712812	9.21523e-05	9.95428e-05	0.130797	9.46079e-05	0.000105181	0.148509	0.0220239
ANKRD9	4.1081	2.07074	4.18236	4.38616	2.19698	1.56795	3.01139	3.29762	3.88872	2.73446	2.9657	3.06352	5.64667	7.84763	2.85707	5.53543	3.00033	3.59842	3.77597	4.60039	3.41133	3.53037	5.35917	5.19705	4.46916	3.01308	4.99466	4.06772	2.50378	5.3293	5.01739	2.89094	6.26767	4.01826	6.78979	3.63887	3.4472	6.13238	8.58391	6.37884	7.16618	4.55506	4.05158
ANKS1A	44.934	49.5229	89.0159	64.4541	50.0256	63.1752	97.0563	61.3975	50.7129	63.7442	58.2474	33.0645	49.0253	43.6065	75.8964	67.3445	51.9577	63.4259	62.9182	65.2028	50.2795	59.5375	68.2053	49.1933	63.2057	65.216	77.6168	83.0725	56.2841	69.7937	40.2801	66.4453	101.036	61.509	134.427	104.338	79.1799	40.4612	62.8454	29.3685	53.3739	122.899	79.2923
ANKS1B	0.171538	0.426116	2.15735	1.5418	1.12251	1.05845	1.85502	1.2348	1.1947	0.801041	2.07674	0.0704788	0.412618	0.0352887	0.454166	1.58146	0.779912	1.86764	0.856618	1.45348	1.22095	2.19764	5.23334	0.17667	0.956027	2.04003	0.994086	3.29526	2.16383	3.99195	1.21728	2.19389	3.3942	1.5339	0.19289	2.07389	1.30004	0.741915	2.89733	0.131712	0.595209	4.57659	1.37772
ANKS3	10.7838	11.973	11.4786	15.1792	9.19148	12.8537	7.10272	7.84912	12.7957	11.008	7.73902	6.99319	9.80677	8.06572	13.6888	9.1275	11.3536	8.15312	8.2309	9.58858	9.16472	9.38828	12.1444	6.94584	10.3959	10.2148	9.12695	9.72161	7.92608	6.69627	8.80622	10.7475	6.5159	10.3084	9.94659	10.0175	10.3136	7.94909	6.076	8.46284	7.79522	9.34581	8.98185
ANKS6	33.3351	34.3822	33.44	47.2642	36.5422	42.4656	34.7986	46.0431	37.6971	36.1063	46.1913	32.7011	35.6784	36.9249	39.0253	35.1268	50.1269	36.6587	43.5048	38.9719	34.4624	46.4724	33.9989	37.0192	30.4764	35.4746	35.6876	39.8473	31.4771	37.3714	33.1366	33.2862	28.9087	41.3712	46.2242	34.7201	38.7971	36.3716	26.6244	33.2186	43.1137	43.753	43.4815
ANKUB1	9.18271e-05	8.38274e-05	0.00186752	8.98604e-05	8.4978e-05	0.00128547	9.85261e-05	9.47635e-05	0.00103753	9.019e-05	0.000101141	0.0435547	8.48689e-05	0.000103314	0.134647	0.000803101	9.66493e-05	9.72975e-05	9.00623e-05	9.61919e-05	0.00391539	0.00835251	9.55554e-05	0.000121546	9.35412e-05	0.000107019	0.00136142	0.00130152	0.00858855	0.00152034	0.030375	9.70507e-05	0.00182596	0.000103092	5.93941	0.0014364	0.00160667	0.0165418	0.00277773	0.0054239	0.000105181	0.000110453	0.00010788
ANKZF1	34.7668	46.9573	36.2154	37.3345	51.8546	33.1529	34.7717	32.5523	33.4674	32.7517	22.5851	34.2622	38.5774	16.883	38.4053	31.9374	27.3201	32.7039	30.494	30.9706	32.0083	25.5538	30.8751	16.2408	28.7273	28.6066	32.119	30.2149	22.1637	17.4958	22.4285	31.6479	25.469	27.9699	51.2123	34.9915	38.4952	28.3531	29.1635	25.7066	23.4052	33.4389	31.0807
ANLN	0.463771	0.524605	0.756116	0.453141	0.0810084	3.49406	0.820376	0.0948146	0.614117	0.418342	0.215693	0.549022	0.410651	0.0235326	0.977751	0.638435	0.821	0.551233	0.615309	0.488897	0.525627	0.233905	0.0387627	0.561496	0.10907	0.117432	0.134017	0.0617043	1.73027	0.969391	6.44782	0.748189	1.55333	1.30082	1.54887	0.628486	0.418956	0.780779	1.31108	0.0818798	0.626454	2.72299	0.607786
ANO1	16.0643	15.5627	14.0025	37.6621	17.5982	77.9312	23.7631	32.9619	36.3586	27.4372	111.419	25.1606	15.9686	11.3322	29.9845	17.1015	55.9702	21.6535	41.2572	87.8747	25.71	138.948	49.1677	20.6318	61.4017	30.1863	71.7059	29.7363	51.778	33.5543	29.7878	53.0316	29.4696	112.756	4.98268	29.6283	23.855	18.6365	29.3665	14.0368	17.9947	44.2511	44.3419
ANO10	13.4588	9.73749	13.1868	17.8387	10.6282	18.2411	15.5419	17.4626	15.147	14.7289	21.1762	10.3002	10.4759	2.83845	12.9601	13.0425	22.0715	16.8058	18.4065	20.4007	15.0621	23.3177	17.1875	9.85948	16.8076	17.6215	15.0435	17.5038	20.0738	20.2054	16.6248	19.2072	20.2346	17.3098	9.54555	17.1328	14.6827	14.3425	15.4381	7.56442	14.0221	13.5808	26.5551
ANO2	2.17424	0.66118	7.84049	3.10354	3.42228	3.34177	2.01049	3.67871	1.70428	2.90832	1.50809	1.23097	3.82043	3.13518	4.40013	3.61153	1.09088	1.39662	3.53058	1.97315	2.95218	2.59547	5.29459	1.22155	2.08948	1.73514	1.76137	3.45451	2.63029	3.62674	1.69523	3.76863	3.31736	2.48188	6.6883	1.78001	1.85384	2.04813	1.54061	1.44779	2.60015	0.642215	1.32224
ANO3	0.0094526	0.0075082	0.682395	0.0920205	2.0037	0.00268807	0.016464	0.168655	0.338353	0.189407	0.521715	0.00299335	1.96091	0.518586	0.00909317	0.181275	0.00542137	0.842947	0.00715066	0.0539852	0.32894	0.0148573	0.349371	0.0219101	0.0124807	0.478327	0.100375	0.244101	0.242742	0.936745	0.0014136	0.552288	0.0687578	0.155918	0.0943009	0.0677525	0.320448	0.196126	0.396622	0.00838932	0.011311	1.79104	0.385976
ANO4	1.02401	4.0148	0.0469207	0.584534	1.68427	2.5944	1.06181	0.857704	4.82848	0.209845	2.78054	7.14944	1.36965	1.03922	1.71201	0.268526	0.598991	0.0485632	0.140002	0.554979	1.35155	1.24535	0.732024	0.615847	0.580011	0.380827	1.96753	0.551599	1.9208	0.0719858	0.285697	2.61493	0.494061	0.000430395	0.0758877	0.98719	0.0291674	0.858624	1.50724	0.648154	0.907047	0.0530189	0.0566075
ANO5	5.10543	8.84792	5.28151	3.53891	6.84617	6.45176	3.16686	4.26133	1.49312	4.02695	3.10146	3.09059	4.59863	1.73045	4.47242	5.31692	8.9871	2.54368	3.03566	2.59037	5.9047	1.88692	2.29754	1.66363	2.77012	4.75167	2.9647	1.70123	2.29988	5.14413	2.78172	5.28197	7.17975	1.38157	1.42788	4.33883	3.16084	2.7067	2.1632	3.16411	1.55344	1.71265	0.747967
ANO6	74.386	72.3277	158.709	88.4114	99.3451	127.423	133.359	115.341	95.5601	68.0811	82.5263	33.6027	62.5272	36.551	71.487	102.341	157.588	118.519	101.195	84.3859	108.038	139.766	158.738	61.8714	117.804	170.477	135.752	164.434	147.357	150.911	154.592	158.496	242.173	181.173	63.6235	139.139	144.69	86.7888	186.733	44.5021	70.645	170.034	154.485
ANO7	2.37894	1.61229	1.40275	1.48483	1.52674	0.863688	1.40469	1.6249	1.09909	3.2122	0.673066	1.91854	1.739	1.63534	1.59879	1.05608	0.955272	3.02775	1.56618	0.618205	3.26851	1.03374	1.151	1.02531	0.663628	0.841477	1.60462	1.63029	0.908362	0.451721	1.2483	0.674331	1.39156	0.83994	1.37445	3.1144	2.13552	1.79837	1.79248	1.89723	1.15176	1.1873	2.06021
ANO8	11.9565	6.2912	13.402	11.2511	7.73108	14.3158	11.123	7.96165	14.4327	8.0046	12.7435	12.441	9.53361	8.22906	13.4797	11.5662	12.8552	11.5258	11.7254	10.8865	10.2626	11.1358	11.2073	6.776	10.9098	7.78767	13.5416	8.62162	9.22466	11.554	10.2978	11.1084	8.18088	8.63581	16.6469	11.4251	9.07035	10.1806	9.05536	13.6334	8.96205	11.5752	8.02137
ANO9	0.166068	0.51005	0.823567	0.572139	0.290955	0.124833	0.6129	0.886917	2.686	1.90924	0.625302	7.99386	1.46537	1.61937	1.4429	1.59993	0.237068	1.21557	1.27807	0.592223	0.173616	0.395783	0.652772	0.0970943	1.20645	0.497192	0.0940623	0.680551	0.679005	0.35864	0.972524	0.552914	0.428641	0.129001	8.08967	0.817826	1.2254	4.01143	0.407201	1.56529	0.755575	0.238531	0.957052
ANOS1	0.932975	0.68352	1.82709	1.28686	0.622962	3.0891	2.12597	0.914049	1.76114	0.893297	0.358061	0.799436	0.350919	0.791349	0.488112	1.56415	0.736378	4.52437	1.1594	1.08179	1.05005	1.144	1.92456	1.15346	2.37647	0.587109	1.49883	1.47903	1.84501	5.04316	16.1678	1.59726	3.70664	1.71629	5.34302	2.75847	0.761233	1.3343	2.20324	1.35785	1.59148	3.41328	2.4547
ANP32A	74.8483	78.1042	64.4634	84.4816	86.6777	63.4243	60.1571	71.2681	73.6727	74.2221	79.1093	76.8694	80.4631	85.7184	71.134	52.5407	81.6278	69.6358	66.3554	78.2448	69.382	57.7594	65.677	77.7225	57.2801	73.6102	60.2842	69.342	64.5578	72.9926	59.6188	83.4171	56.5097	85.499	112.128	44.3655	60.2782	54.1221	40.2538	72.3145	82.3533	57.6277	68.2247
ANP32A-IT1	0.0933801	0.33304	0.448002	0.692967	0.366483	0.597968	0.35441	0.101645	0.43704	0.189038	0.0860116	0.552361	0.381426	0.140769	0.471284	0.368691	0.597082	0.15492	0.244156	0.255066	0.728289	0.234397	0.301972	0.064196	0.24699	0.176208	0.370373	0.470668	0.312313	0.357634	0.539862	0.453271	0.647852	0.474793	0.7076	0.338221	0.570948	0.783217	0.429527	0.0930916	0.251375	0.692637	0.219268
ANP32AP1	0.0156827	0.123115	0.0472987	0.033084	8.4978e-05	0.066526	0.0635003	0.0814879	0.0531157	0.0172936	0.0287722	7.66278e-05	0.0305922	0.000103314	8.72566e-05	8.94826e-05	0.0200122	0.051916	0.0306601	0.0311128	9.22969e-05	0.0968825	0.0566974	0.0321588	0.0309556	0.0392405	0.088429	0.0505159	0.0994386	0.00010431	0.0507238	0.0554952	0.0481557	0.0731838	0.0245031	0.0178932	9.21523e-05	0.0292068	0.0562862	9.46079e-05	0.147047	0.0996041	0.00010788
ANP32B	106.846	105.214	109.384	84.3826	109.065	104.096	94.323	115.89	106.034	114.537	102.319	105.472	109.476	139.804	104.589	83.7722	84.1153	75.244	88.3519	106.778	109.213	72.2857	85.6763	124.241	119.406	102.628	114.821	86.4001	86.6258	89.5519	95.3446	131.338	87.1457	109.307	124.717	106.812	108.716	76.9487	79.7424	104.082	119.29	86.6402	79.117
ANP32E	14.7516	23.454	37.2671	41.1317	31.0468	34.273	24.3499	22.0435	27.9925	18.4778	27.4854	26.3677	27.4683	6.18567	23.1154	25.2237	40.609	35.2219	26.7879	20.0955	26.3525	31.6657	31.7221	7.65231	27.0632	32.1139	32.8344	30.6107	38.2626	35.8077	29.5665	33.6511	33.757	30.6416	44.3282	23.969	27.7382	27.7465	26.0416	13.3	19.3799	29.2123	29.6888
ANPEP	0.709399	0.783339	1.36824	1.16644	0.329608	2.5598	0.36074	0.631637	3.25411	2.29386	0.860478	2.37241	1.49862	1.14198	1.11438	4.54183	1.09266	2.12209	1.00276	1.14174	1.14144	0.690112	0.821715	3.85334	1.35377	3.21143	3.45981	1.11638	4.27756	3.23634	12.3504	2.30193	0.526303	0.867922	1.0214	1.47618	1.43683	0.427996	0.919622	0.395229	6.10909	3.83369	1.24016
ANTKMT	6.66973	2.84161	5.8329	5.49359	3.06884	6.06954	5.98551	4.66791	5.81628	6.38996	6.54647	4.22869	3.84457	12.8502	4.10093	4.80556	5.87397	6.0233	7.34271	5.27905	4.52409	4.4113	6.06722	8.73865	5.33631	5.77229	6.97528	3.91164	4.87725	3.93293	6.03628	5.21521	4.90336	7.663	6.52644	5.3564	4.65778	5.43967	5.38147	6.93767	9.44277	4.86194	5.97469
ANTXR1	167.453	188.907	537.075	180.252	203.27	334.334	315.018	208.372	298.508	161.831	190.559	162.845	182.838	123.548	228.109	266.543	348.922	391.189	229.512	222.354	482.687	375.454	371.97	182.705	282.469	312.371	430.946	404.804	302.057	425.118	575.384	283.178	440.847	308.626	72.6186	639.284	438.652	455.249	438.123	409.198	175.287	332.613	299.048
ANTXR2	211.751	155.689	215.564	117.54	139.207	209.995	156.025	187.058	118.046	140.347	158.845	109.215	122.793	208.974	122.959	118.095	207.92	195.079	168.566	148.698	267.742	204.73	170.294	264.114	186.474	211.996	195.802	226.297	126.88	184.422	191.889	185.963	331.679	168.173	13.1198	256.211	243.871	234.098	203.553	148.976	153.7	144.548	197.465
ANTXRL	9.18271e-05	0.0460889	0.671387	0.0475677	0.146644	0.305289	0.240521	0.162559	0.197067	0.290858	0.0752802	7.66278e-05	0.0668261	0.277067	0.0148136	0.515776	0.0697517	0.135581	0.115778	0.0850861	0.0445505	0.096579	0.181711	0.370568	0.094618	0.0685973	0.061817	0.103045	9.712e-05	0.164772	0.0517595	0.000879179	0.0840743	0.271707	0.284748	0.1714	0.222113	0.0508622	0.128271	0.195407	0.378189	0.129972	0.150555
ANTXRLP1	0.07692	8.85255e-05	9.98597e-05	9.87059e-05	0.144498	0.0333109	0.0380604	0.000105654	0.0927757	0.154683	0.000112657	0.363387	0.0305922	0.107145	0.0337442	0.0565447	9.66493e-05	0.0851009	9.5515e-05	0.0157278	9.6837e-05	0.0138881	0.113299	0.112252	0.0763435	0.000122756	0.000131475	9.76526e-05	0.0994321	0.037739	0.0338325	0.0359658	0.024098	0.0183604	0.14647	0.000102	0.136674	0.000115095	0.000112885	0.0558928	0.000110795	0.000117084	0.000113756
ANXA1	99.9896	52.0989	172.987	168.848	104.497	143.606	245.791	281.132	201.527	235.824	159.536	48.7901	126.514	247.818	69.7709	287.658	120.551	138.395	190.626	186.592	89.9069	224.327	202.427	277.33	202.718	216.643	126.511	186.497	236.773	345.299	205.625	196.567	314.792	182.738	334.645	207.733	135.8	128.547	195.538	77.1876	276.815	217.008	158.497
ANXA10	0.046736	8.38274e-05	0.0118806	8.98604e-05	8.4978e-05	9.58231e-05	9.85261e-05	9.47635e-05	0.0398119	0.0344443	0.000101141	0.0146104	0.0153385	0.0176866	0.0169157	8.94826e-05	9.66493e-05	0.0172998	9.00623e-05	9.61919e-05	0.0170271	0.000106291	9.55554e-05	0.000121546	0.0309556	0.000107019	9.8385e-05	9.76526e-05	9.712e-05	0.00010431	9.71798e-05	0.0111501	0.000107459	0.000103092	0.0895441	0.0356892	0.0635206	9.95428e-05	0.000102874	9.46079e-05	0.000105181	0.000110453	0.0220239
ANXA11	73.7847	51.0415	85.3337	79.2078	62.1341	93.0824	104.988	107.943	107.296	98.3625	84.0544	84.2505	79.885	151.227	61.7682	104.045	78.4851	89.1768	96.9455	100.984	67.7294	93.7406	89.0129	179.947	87.4491	119.033	78.8113	76.2288	107.719	116.305	101.725	83.9383	80.7613	110.228	185.365	88.247	80.0042	74.0244	69.3897	62.274	129.409	124.803	111.899
ANXA13	1.5262	3.0618	1.23803	0.534447	1.15092	1.565	1.67686	0.438671	0.792881	0.961114	1.13849	1.14132	1.18288	1.15644	1.78402	0.772579	1.05484	0.793696	0.658884	0.659884	1.51272	0.378876	0.666783	1.50953	1.06033	0.787538	1.0212	0.824894	0.445849	0.498797	1.16732	0.705284	1.21282	0.645237	7.31257	2.60277	2.17912	1.22427	1.85104	2.33688	1.29492	0.412814	0.645456
ANXA2	176.47	88.8814	254.514	410.58	183.628	225.799	338.285	358.044	319.719	383.687	313.352	178.115	206.539	504.409	143.822	350.103	311.951	295.901	405.341	462.973	153.717	498.571	328.03	751.374	314.776	369.498	195.468	328.702	424.174	533.078	440.924	375.728	347.754	404.921	384.227	260.454	166.575	220.434	175.837	130.849	588.14	544.034	454.948
ANXA2P1	0.0828432	0.0746144	0.0507734	0.176574	0.0812321	0.141801	0.0549793	0.0218544	0.155957	0.0362322	0.0777712	0.0773254	0.0324923	0.0563692	0.110349	0.0959172	0.124997	0.0551027	0.0758625	0.141645	0.163624	0.104679	9.55554e-05	0.0699113	9.35412e-05	0.104936	0.0373183	0.0716677	0.292717	0.177115	0.116753	0.0229248	0.0377743	0.0577982	0.146566	0.096564	0.0226744	0.338577	0.0603203	0.157862	0.0680223	0.106753	0.0939982
ANXA2P2	11.2901	6.03882	16.1415	28.4771	14.1745	13.8935	21.717	24.6607	21.128	23.3346	20.27	11.6418	11.6415	26.3383	9.29573	26.2354	24.5842	18.9616	30.5694	31.5061	9.31595	29.803	19.7896	40.7766	15.8397	24.2101	13.7122	21.5475	25.8266	43.6185	27.2535	28.1235	27.7772	27.7628	26.5795	18.2463	10.0508	16.0078	16.6765	9.41624	34.5139	37.7272	30.9487
ANXA2R	6.76489	1.95699	2.41241	3.00218	3.39642	2.24562	3.25061	1.97634	2.60713	4.10653	1.6856	3.63916	3.87202	5.51525	2.99871	2.50876	1.57393	2.70924	2.85655	3.02278	2.90745	1.62727	2.72628	2.38958	3.06823	3.01073	1.47227	2.23099	1.22583	1.61203	1.69203	2.69348	1.48767	1.51627	1.57614	2.31862	3.21352	1.93331	0.95838	2.51149	3.53548	1.57409	2.07716
ANXA3	12.1431	17.489	7.40236	8.05066	8.46388	19.3147	6.42833	15.6186	10.1691	20.561	18.9577	25.0854	8.8472	12.9941	10.7535	10.5799	8.57678	6.107	6.92546	7.5642	2.8282	6.57403	9.79221	6.53572	5.87932	10.2139	6.27714	4.90747	17.8248	9.8604	12.2123	4.57052	10.292	5.27647	36.4328	14.486	3.70008	9.07847	9.67149	3.60838	7.39161	8.31043	2.78344
ANXA4	42.0025	64.7867	57.9278	73.6329	54.8484	69.4022	91.7909	81.7557	77.2123	84.2126	76.1359	64.7084	47.6945	70.1965	50.9777	69.4041	97.4663	79.8404	76.8837	71.1634	55.589	89.8564	76.3806	86.1716	75.81	88.6666	68.3625	97.888	62.4603	76.088	75.1624	87.9951	90.6883	85.4385	66.6305	73.3494	68.1762	84.9431	68.8594	41.4516	68.1742	70.0782	91.8831
ANXA5	289.396	259.899	301.124	340.78	300.63	452.589	358.602	443.938	364.616	351.219	504.538	291.287	268.159	406.384	275.65	330.496	500.771	368.719	398.417	539.4	261.694	523.282	370.78	660.928	482.159	452.481	412.557	356.776	476.371	501.464	447.474	488.167	435.476	474.873	229.502	406.763	355.77	423.29	339.843	347.976	499.23	453.333	403.803
ANXA6	196.804	137.148	247.885	290.646	172.88	300.373	298.87	292.997	245.959	267.17	391.065	134.866	162.613	275.733	143.959	200.947	332.397	340.992	279.916	363.532	169.463	447.388	300.06	641.968	287.793	362.54	251.276	306.845	322.647	396.318	267.253	395.154	278.749	423.613	52.2554	241.306	218.752	156.147	244.29	125.58	375.036	488.317	467.938
ANXA7	90.5143	86.4227	117.953	99.5248	87.0674	106.157	110.304	92.0719	91.8161	84.2094	98.5581	65.8292	78.687	71.364	67.8296	99.3912	94.8293	106.257	98.0572	91.9443	110.507	109.673	98.0192	96.4675	92.1577	102.676	113.17	107.003	96.7398	117.027	89.7906	97.8404	109.557	90.3008	75.0943	109.446	109.941	114.628	112.26	97.0865	93.7493	101.999	107.238
ANXA8	0.0538985	8.38292e-05	0.0036977	0.0546853	8.49952e-05	0.00102923	0.172424	0.0396073	0.0387287	0.0669239	0.083669	0.325239	0.000942185	0.000103314	8.72566e-05	8.94826e-05	0.000376257	0.0335642	0.00180474	9.61919e-05	0.0281216	0.0671127	0.0368011	0.109194	9.67689e-05	0.0681937	9.98677e-05	0.130879	0.0139018	0.127105	9.71798e-05	9.70507e-05	0.140126	0.000103092	0.00204181	0.0520294	9.21523e-05	0.141117	0.0017648	9.90517e-05	0.000571143	0.0893371	0.0150715
ANXA8L1	0.00052174	8.38274e-05	9.35396e-05	0.000459299	8.49855e-05	0.000503336	9.85277e-05	9.47635e-05	8.90469e-05	9.01966e-05	0.000101141	7.66278e-05	0.00045916	0.000431647	0.000756132	0.0687539	0.000218722	9.72975e-05	0.000838666	9.61919e-05	0.304699	0.000106442	9.55554e-05	0.000121546	0.0924515	0.00057836	0.000959799	9.76681e-05	9.712e-05	0.000111532	0.000513752	0.0428473	0.000107459	0.000103092	0.17399	9.72288e-05	0.000355353	9.98607e-05	0.000828444	0.000248597	0.000308613	0.630529	0.00664079
ANXA9	6.20376	7.88588	6.62442	8.01767	8.3906	10.1639	6.83326	8.12413	6.7927	8.07331	7.27385	6.99084	8.58789	9.2313	8.63308	8.93618	7.8803	9.03143	7.02715	5.0145	5.0636	7.69036	8.62244	3.54024	6.45027	7.27893	6.50636	5.83181	4.31435	2.82271	3.08688	7.73168	8.85261	5.09389	6.93695	8.70233	5.94122	3.91569	7.72974	3.06899	6.03057	3.26488	3.33134
AOAH	1.33639	1.57764	1.06018	1.80958	1.65174	3.60437	2.2853	1.33618	3.84439	4.27695	3.44274	7.87029	1.89793	2.41253	1.67592	3.53235	0.0850293	3.68482	1.01641	2.4877	2.815	1.73608	5.32809	2.46195	3.95273	4.44699	3.97159	3.4566	6.22332	2.95098	5.16122	4.52108	3.3196	2.02233	4.94545	3.46054	3.07915	4.17755	4.28326	1.73727	3.94236	6.56089	3.08859
AOC1	0.0116362	0.0526558	0.0118806	0.0735842	8.4978e-05	0.0333109	0.0376809	9.47635e-05	0.00992044	9.019e-05	0.0426267	4.5492	0.0680398	0.00010348	0.0337442	0.0499004	9.66493e-05	0.0639617	0.00764084	0.00583301	9.22969e-05	0.0103393	0.0561313	0.0239092	0.0115511	0.0291636	0.0393739	0.0375332	0.0568637	0.0979074	2.5203	0.0247176	0.0713592	0.0543273	0.0121651	0.0178932	9.21523e-05	0.215457	0.0187735	0.110575	0.000105181	0.000110453	0.0163805
AOC2	1.32979	1.55852	2.15699	1.54752	1.36468	2.95053	1.95146	1.6663	2.37902	1.53806	2.93213	1.20022	1.84823	1.55924	1.50325	2.36268	2.98523	2.33993	1.83272	2.36744	2.27964	3.78991	1.43959	2.06282	2.10945	0.923089	3.48719	2.69183	1.64522	2.08245	2.00362	2.34335	2.59162	2.23887	2.23223	3.19221	2.03524	3.75704	2.1222	3.92825	2.26499	4.14871	2.02763
AOC3	51.7319	29.0908	129.595	162.13	43.4269	137.87	233.395	89.839	165.369	87.4357	131.493	17.3158	66.1333	23.6139	37.6357	113.405	155.297	386.058	143.159	170.009	102.869	249.047	241.082	149.601	189.812	255.056	155.864	220.931	191.552	354.817	153.448	292.127	251.86	263.084	9.75506	84.6278	129.307	122.202	252.991	59.5102	181.53	520.15	341.277
AOC4P	0.423762	0.286476	2.00692	2.15343	1.21541	1.35204	2.37368	0.733562	1.89587	1.71161	2.34445	0.175686	1.61933	0.932163	0.221863	1.93279	2.74429	2.94841	1.55603	2.57584	1.5769	4.0377	2.35938	1.99277	2.23615	2.03448	2.0531	2.97723	1.69451	6.52625	1.14591	2.9561	1.17269	3.55395	0.249477	0.706834	1.03813	2.72594	1.92648	1.28139	3.66475	4.04609	3.01732
AOPEP	94.7095	89.0771	67.2103	46.6258	68.5745	89.0865	109.296	83.5828	70.7977	110.383	64.9199	48.9017	77.3238	128.413	72.622	89.4594	64.2024	81.1231	66.5701	74.3996	65.1501	72.5391	76.4493	140.175	85.6847	64.8287	57.254	53.467	66.5699	73.8021	67.134	75.1539	84.5333	77.9432	16.4977	63.8888	70.1232	57.2724	111.853	55.9607	87.2886	64.6111	56.7183
AOX1	11.941	14.7027	27.405	37.5639	33.4522	9.66569	27.1935	27.3984	22.0065	23.5842	17.1822	10.1156	25.3974	9.61814	22.8195	28.1632	9.96974	13.1256	15.9661	16.7508	14.5979	10.1986	41.4892	11.2452	24.6126	20.2125	28.6347	24.2681	11.396	49.6591	12.4822	21.3877	9.72827	9.56694	19.3143	16.1055	22.0943	27.3802	13.3309	7.32825	26.174	22.2846	13.6538
AP1AR	12.6435	17.0605	19.8038	19.4763	20.4065	16.3749	12.8439	13.3248	14.8965	11.8096	23.1034	14.9021	16.9065	3.58479	12.5803	15.1879	22.3182	18.3958	17.9957	16.1049	16.7054	21.7722	17.7477	9.61225	14.5759	19.9894	13.2763	24.2977	18.8998	26.428	18.9968	19.1668	25.8109	23.4681	15.292	19.6897	14.4772	26.0447	18.1223	15.4198	13.8862	16.0938	15.5293
AP1B1	17.0601	20.8399	25.1675	28.4816	18.7041	18.7931	24.9809	21.288	27.7496	25.5964	27.6621	23.4156	16.2676	12.2937	21.2352	25.9344	18.4042	22.7859	23.4456	19.8653	15.3086	27.7033	18.7886	25.9722	21.531	30.664	30.0277	22.5647	26.8888	18.3302	27.9852	24.5462	24.9259	21.8125	40.4166	30.9744	30.3603	24.5062	20.9438	19.1677	27.4517	37.3409	31.9186
AP1G1	44.9615	53.3985	67.096	69.0043	73.4435	56.2792	60.2331	48.6414	51.4942	44.9455	50.2404	47.1067	53.0907	33.7954	48.9158	58.3532	70.0024	63.4482	59.3516	45.1877	61.8753	73.6693	60.6332	34.8607	57.5282	55.9571	52.8567	74.085	83.1658	78.6466	69.8115	53.5545	80.6276	62.4924	87.2545	64.1278	65.822	66.5836	71.6932	47.2266	39.9016	62.4541	68.2259
AP1G2	18.5101	24.2361	12.6869	12.7642	21.1	20.7673	16.9224	15.5787	10.6887	15.7887	9.87769	27.1389	20.5673	13.5705	22.5371	14.972	11.8056	15.0845	14.4341	10.9575	17.2911	11.9541	10.1739	10.3567	15.5881	9.75611	22.0252	7.1544	9.44696	9.05095	10.589	11.2456	9.3507	8.33253	22.7458	19.2253	17.3768	24.5388	10.9848	14.8008	7.84565	6.71281	11.6395
AP1M1	37.8663	27.1405	39.7519	40.7747	28.6214	36.3747	40.4672	37.9155	38.6786	44.4758	40.6185	26.0671	33.9607	52.1788	28.5509	40.606	31.447	41.3314	37.7699	42.7757	34.6899	35.6767	43.4853	54.6936	33.3432	46.1452	38.2319	31.8511	34.8286	33.587	39.4494	39.7392	39.4616	43.5195	23.5707	34.7524	41.039	32.308	36.3084	46.5706	48.371	42.6397	52.214
AP1M2	0.0590678	3.79539	0.247574	0.00902926	8.4978e-05	0.0630907	0.137237	0.0111004	3.78275	0.0280138	0.580834	12.5883	0.190194	0.691152	2.43503	0.0810638	0.302023	0.85541	0.769303	0.0670841	0.00110856	0.0673189	0.0818856	0.130324	0.150605	0.137943	0.15297	0.200448	8.4699	0.081678	2.15245	0.0689748	0.728099	0.158395	54.4743	0.530476	0.194858	7.98452	0.151861	0.924859	0.306459	0.174341	0.0713627
AP1S1	14.2887	11.3381	11.5043	13.7257	9.41652	15.1296	12.8313	11.9831	12.8968	15.3907	16.9245	13.5165	12.5843	22.9462	13.7489	10.2113	15.0242	14.3642	15.6305	16.1868	10.9908	14.8018	11.7733	28.6574	10.9098	16.5536	13.6121	13.5962	17.8816	12.476	16.7919	17.1433	14.0825	15.6466	16.2566	15.1089	10.2544	10.8187	12.1173	13.3173	21.023	15.953	16.722
AP1S2	142.42	101.635	114.423	101.488	102.16	159.817	123.28	111.528	65.8508	89.2289	135.526	69.7044	75.1267	95.2169	70.5683	83.2916	97.755	173.346	136.821	90.4887	333.519	124.256	122.507	139.307	165.538	147.235	167.874	134.43	112.542	90.9707	129.303	101.397	171.444	165.665	11.4094	121.848	123.436	226.735	235.563	202.702	106.699	60.8574	179.956
AP1S3	0.444807	0.713781	1.35944	0.335885	0.150775	0.812229	0.334564	0.129075	0.928829	0.130991	1.12966	1.79306	0.682582	0.143671	0.505927	0.142889	1.66264	0.522601	0.797361	0.23082	0.953625	0.875256	0.140453	0.430101	1.54267	0.550338	2.63501	0.872855	3.84276	1.09677	1.87711	0.769281	1.38042	0.629471	11.4815	0.656074	0.203412	2.168	1.80695	0.977079	0.963686	1.12664	0.418095
AP2A1	65.4788	53.1094	77.6756	76.0665	51.9712	74.397	82.3742	72.1235	82.6123	68.6192	81.0319	48.6141	60.2527	73.5877	62.1097	74.1639	68.3556	81.1576	73.6157	73.5408	78.2179	85.3817	82.6695	106.614	69.1779	102.469	90.1081	64.4908	77.3493	60.5421	80.4778	77.0846	78.6338	93.469	68.1467	80.2105	87.8935	61.3517	76.3594	90.9958	106.718	98.1123	101.449
AP2A2	39.7182	34.1238	42.4426	40.0561	34.4562	37.5814	41.9753	53.4018	42.6625	47.7021	38.3098	35.0681	36.1084	42.0406	41.3516	40.4603	29.4725	35.944	37.1171	36.4981	43.7431	36.653	46.834	46.2729	40.3659	44.4986	50.8746	39.3614	39.9501	38.499	42.4959	38.8805	41.3469	49.5018	35.9156	43.2165	43.8377	41.8038	31.7765	45.0277	54.5158	54.4688	48.1137
AP2B1	83.7108	97.6501	119.915	110.75	90.2299	112.733	102.408	94.0897	98.5003	94.9869	83.7789	74.5931	88.8225	73.9204	87.4029	115.848	121.426	106.763	99.1278	82.868	122.163	116.072	106.144	105.442	94.0935	106.503	100.438	102.486	101.47	102.914	101.292	95.8384	104.584	104.963	102.665	103.762	95.5553	115.508	126.607	101.252	98.8143	133.397	145.773
AP2M1	175.202	136.14	195.109	165.459	121.484	181.644	215.686	186.396	185.525	176.389	196.095	127.168	133.606	220.964	134.692	164.732	178.574	206.621	195.245	208.19	167.62	201.977	195.636	311.417	188.504	226.404	193.091	187.462	181.727	196.888	224.434	218.797	232.587	232.332	115.966	196.68	184.87	191.307	182.886	203.65	238.879	213.244	222.629
AP2S1	22.0992	13.3312	14.679	17.7177	15.1541	19.1102	22.467	20.2197	20.1984	20.4166	25.4414	16.5589	17.4523	38.1364	15.4791	16.7858	16.3245	19.6839	21.5211	22.6444	15.0368	20.2075	18.2895	46.4159	17.1033	25.1675	18.41	16.1314	20.49	22.8767	23.4368	20.9239	19.938	24.216	17.571	17.1658	16.393	16.6543	20.1604	26.2824	37.1502	23.7415	25.1753
AP3B1	29.5888	29.8644	48.6523	37.8254	34.2597	46.2325	43.6705	41.3108	41.7065	30.5303	38.0676	36.1614	28.4685	30.5151	35.1325	35.1564	61.9872	49.2224	45.2559	37.9963	47.1184	59.9281	43.6423	49.577	45.1142	52.6819	45.7858	58.8413	53.1987	55.5794	55.4847	46.094	77.714	49.557	52.1675	51.9253	44.2296	51.7907	56.4698	38.4086	39.2823	49.3636	50.7056
AP3B2	0.452095	0.51218	0.353529	0.0736132	0.208918	1.25688	1.61398	0.673021	0.37359	0.0891776	0.68049	1.39085	0.0365289	0.274793	0.371659	0.826272	1.26448	1.60348	1.16245	1.98567	0.814705	0.418953	1.24167	1.15998	0.836387	3.78828	1.66639	1.49011	3.83135	0.743767	2.25166	0.448592	1.51813	1.11899	1.44139	2.24673	1.25469	1.85366	3.04098	0.410583	1.06378	0.514838	0.989267
AP3D1	45.4049	40.6424	55.3026	52.0543	42.0675	45.3844	50.492	51.9728	59.3247	48.8053	48.3818	45.9858	43.4562	42.0306	45.8854	44.1385	61.1374	44.6971	54.6538	44.733	44.3572	44.5849	48.0785	48.7962	44.0423	57.6999	62.4048	34.0094	44.0093	44.3986	53.0363	47.1204	53.2916	47.5605	57.6416	57.411	56.7207	45.4352	41.2279	49.0556	57.9089	60.2356	53.0435
AP3M1	14.2431	25.3325	31.1552	28.0563	25.8587	25.923	32.1632	19.618	21.9312	16.0594	18.3995	9.52579	10.9847	6.21919	16.5527	23.2024	35.7432	26.8052	24.7911	17.4042	29.7957	32.053	39.712	8.37827	15.724	32.6908	26.2795	33.1249	29.8198	36.6129	26.6782	36.9844	50.7645	22.6137	15.8881	34.4296	28.6952	38.5824	44.376	27.7806	18.114	29.6591	26.9012
AP3M2	28.4166	27.1058	33.7218	24.2673	27.8468	27.3531	23.7792	23.398	22.7414	23.2541	22.2206	20.0947	25.5743	21.3344	21.9226	24.9644	29.081	30.5839	28.2771	28.7152	32.5942	30.5692	24.4767	20.6495	26.5379	22.3352	24.3215	27.8292	21.6898	24.892	25.8705	29.7555	30.8476	30.5403	37.417	30.1544	22.858	20.554	21.0115	22.0159	24.7175	21.9672	26.2699
AP3S1	63.7124	47.4721	65.9319	69.4502	55.7993	75.8211	78.937	66.3853	58.853	60.1394	63.3161	42.9909	49.0151	51.7632	54.5439	70.4126	60.7793	71.7602	68.9442	72.1137	67.171	82.9707	66.7581	90.5908	69.3025	78.1789	61.6023	86.7016	78.9897	93.5543	82.0831	74.9697	95.0423	89.3139	46.898	79.8724	70.2689	64.9836	71.6881	71.7233	75.6376	68.8452	97.0314
AP3S2	24.3671	11.1309	13.2621	14.1065	24.6952	8.26544	11.2626	22.2739	15.1462	9.57838	12.6597	13.3297	8.67619	14.7497	12.8794	8.61737	14.3802	16.448	14.1136	24.6793	9.65073	15.9702	20.2228	26.5633	12.9691	15.2991	10.1129	12.9905	16.7425	35.1555	19.297	24.7069	31.2242	13.9035	11.6455	14.3451	9.96613	14.3626	12.2922	25.2307	26.9102	19.7228	10.9577
AP4B1	12.865	13.7292	12.0587	11.0245	18.2638	12.0143	11.693	14.3016	11.9603	19.0589	16.6661	12.4364	15.2974	11.5394	11.2902	13.0727	16.0547	12.6434	14.2186	15.875	8.30754	17.383	10.978	9.42318	17.7658	10.1927	6.88389	15.3161	12.019	10.72	9.53555	12.6546	8.85996	12.3768	6.1326	6.45465	10.7541	10.6532	12.3776	6.92135	9.61838	11.5992	11.237
AP4B1-AS1	1.05471	2.24226	1.21605	2.25173	2.51585	1.80487	2.14764	1.58861	1.90891	1.17761	1.1243	1.73576	2.20604	0.460863	2.52561	1.89198	2.14314	1.73826	2.27428	1.91162	1.91221	3.07985	2.2415	0.540381	2.13875	1.65312	1.96913	2.38951	1.5702	1.40449	1.346	1.71657	1.73939	2.5627	1.54253	2.31018	1.31665	2.80929	1.53161	1.24794	1.46347	2.33689	2.15831
AP4E1	8.70207	9.34699	18.9852	12.9574	9.58251	17.7802	13.6049	9.99625	13.6234	8.60822	13.5716	8.24151	8.16391	9.48016	11.4502	12.2784	22.8808	14.7283	14.8672	11.1755	14.0278	15.6766	17.779	9.90694	10.0462	14.1833	14.933	19.5577	16.7057	17.7902	16.6056	13.6559	26.4204	17.4383	9.31937	21.7107	17.7497	17.805	16.7814	14.6847	10.1302	16.0826	18.9038
AP4M1	17.8348	14.5166	13.1394	16.4846	12.2252	15.4604	15.0415	18.3881	17.8684	19.2991	15.8079	13.6949	18.3689	24.2393	17.6236	18.9529	13.7293	13.7982	14.5371	17.0814	15.9307	9.82623	16.4214	18.2955	13.5181	17.091	15.5426	12.0192	12.1405	10.9166	14.2516	12.9949	10.3904	13.7592	13.2164	13.5392	17.5017	13.1911	12.0675	25.1099	17.2418	12.7154	18.769
AP4S1	14.3874	13.5267	12.2334	13.9335	15.6785	14.5633	10.9781	11.4616	10.8569	11.1726	14.0751	9.10665	13.0552	12.3042	12.6884	10.7015	14.7232	11.1736	12.1066	12.2594	12.2725	14.2686	12.1701	12.142	11.0698	12.2297	12.4992	12.5361	11.5927	14.2761	8.21544	13.2497	13.0965	14.3778	11.068	11.333	13.074	12.9024	13.1875	11.4366	13.6879	10.8445	13.0826
AP5B1	29.3393	23.3421	43.8361	35.5018	24.3656	33.4975	33.4952	33.0243	34.7311	26.6589	26.933	20.0858	23.5365	27.553	23.947	37.9859	32.9338	37.9489	26.6541	26.7024	41.6428	23.6359	37.2252	25.1654	30.9393	36.5703	38.0679	28.7721	29.689	24.5568	32.3185	29.3569	30.552	36.2409	26.8123	39.1157	43.66	25.814	31.3668	42.2765	35.9316	34.849	39.164
AP5M1	26.9245	33.5189	27.6974	30.5684	30.3813	33.979	28.1359	30.392	26.7515	23.2016	32.2348	30.9364	25.8564	10.4486	25.3047	26.3916	39.0628	39.3741	32.0818	24.2117	30.6175	39.5578	30.9983	23.142	28.3603	32.0451	30.924	41.0373	32.4016	40.9457	33.6376	28.0115	40.2928	33.6418	30.2801	33.7726	29.3434	33.4043	34.8388	32.1235	23.6494	29.6772	37.6265
AP5S1	3.48267	3.68226	4.78628	4.93638	5.87879	4.0926	5.35464	3.63453	3.76658	3.04047	2.42057	3.82357	3.53835	1.18608	4.28622	3.5976	6.40639	6.91425	4.48176	2.94941	6.45565	4.86524	5.91605	3.71993	3.80694	3.90384	5.61508	6.88644	5.43978	6.00708	5.43243	5.02284	7.39662	5.80751	6.79604	5.89002	5.50156	9.03288	6.43111	2.54211	4.44848	9.60325	8.55644
AP5Z1	27.784	13.3382	23.4426	21.201	16.3025	19.5214	25.7215	22.8058	21.3534	23.8342	15.1777	19.1182	22.6776	21.8078	13.9184	19.5868	15.694	23.6048	20.6492	21.3679	24.8622	20.2398	24.2128	26.8259	19.1531	27.2666	26.7137	18.0788	17.8268	13.4164	19.3274	20.1635	16.9386	22.4056	12.781	26.3862	21.0288	23.009	19.4012	31.2827	28.923	19.1642	24.2528
APAF1	4.03549	7.94808	11.627	7.43107	9.19765	11.3335	5.70693	5.06328	6.14479	3.7112	4.46664	5.50476	6.87379	0.921447	9.58107	8.21818	6.79831	9.0509	7.73731	4.025	8.21087	11.1949	9.8783	1.5405	6.98947	6.31774	7.35891	12.4778	12.2898	11.2165	11.0214	8.69785	14.2988	7.10224	11.9862	7.45956	6.30183	11.0664	10.2978	3.02736	3.16284	9.49166	9.89606
APBA1	10.8837	14.4048	17.4331	15.0289	16.5613	10.0144	14.8812	12.8361	17.5179	11.2167	9.3357	11.3655	17.8163	10.1632	13.1263	13.8177	15.2431	18.4412	15.3559	11.0797	16.2914	17.1585	16.5656	14.6732	12.8696	20.5452	19.7834	24.3185	16.6611	15.8067	29.333	11.3681	18.8207	29.4491	3.67589	17.4046	22.3269	17.0257	17.4571	18.0415	10.8675	22.161	29.2361
APBA2	1.07133	1.37787	0.305962	0.857914	0.286703	0.397868	0.212964	0.353106	1.72649	0.121444	0.830076	4.30399	0.426002	0.276265	2.41751	0.645212	0.578388	0.716391	0.739429	0.641626	0.460123	2.08918	1.49873	0.501878	0.787169	0.291579	0.480973	0.736993	1.94608	0.290661	3.24812	0.175335	0.570787	0.822758	1.67254	0.834519	0.442756	1.93533	0.537079	0.854374	0.536812	0.600407	0.396037
APBA3	17.9581	15.0532	13.3313	14.2866	12.824	13.2363	14.7167	12.4502	15.7436	16.2152	14.3471	14.3304	14.1402	15.2799	14.5567	14.9235	9.83045	14.1062	12.8034	11.9219	15.4446	11.0945	13.5845	15.7464	12.1289	14.0099	16.9622	9.19302	13.6808	7.35769	11.7147	11.7329	10.316	14.7703	11.8733	15.3046	14.3561	12.559	12.1173	19.0273	19.4944	12.614	15.5167
APBB1	56.706	51.2248	41.2444	57.3593	57.9625	63.2493	54.7561	52.6018	47.2923	65.8347	57.3971	33.3856	49.4173	34.2552	59.1084	52.2125	43.2361	50.2737	46.2458	47.5345	45.483	55.8785	55.9907	55.9608	51.9076	50.5351	59.8979	40.2792	38.8608	35.0337	31.5971	59.7474	37.4719	51.2845	27.0842	40.5608	56.2248	40.0123	41.8997	46.5663	55.6248	57.1718	62.7844
APBB1IP	3.15635	2.17306	2.60503	3.38199	3.35873	3.90287	3.10033	2.53886	5.03165	5.89182	2.1765	12.005	2.95929	5.41574	3.26481	5.28005	1.29356	3.4234	4.64751	3.77829	3.06529	2.99076	4.79238	3.81255	5.21579	4.22652	4.09076	5.17637	3.50543	8.4491	8.29899	4.53183	3.65866	5.31298	11.6456	4.92959	5.43379	5.56894	3.95828	1.74844	5.82118	7.44477	2.84919
APBB2	10.288	15.0113	66.2382	30.7261	41.2184	20.054	33.667	15.972	26.4008	15.1969	12.7599	13.9103	23.5619	3.76507	26.7309	35.2503	21.2897	28.3207	24.538	10.0052	28.5089	24.3239	33.6459	5.77336	22.7237	23.6055	29.7468	29.834	30.4615	44.0935	31.9852	22.6332	45.5578	20.2942	11.1183	34.9247	27.0789	37.5088	38.5667	3.72028	8.02776	47.4158	24.6611
APBB3	28.7754	17.7529	22.0064	16.8752	18.9559	20.4742	18.7522	17.064	13.3598	22.4533	19.3419	18.3161	25.6826	22.9905	25.7929	20.9384	7.18741	14.9454	16.3277	16.3788	17.89	14.7042	15.1434	20.1321	15.5926	18.9767	19.4541	8.61929	9.43784	11.2773	12.0329	12.7029	9.4724	16.671	11.1801	18.711	18.6731	22.2409	12.865	13.3862	15.8723	4.96691	20.9577
APC	7.17187	7.42024	5.66026	8.09417	9.18436	5.08111	6.09627	9.37882	4.98374	6.38094	9.23539	6.3109	8.46688	5.38962	5.40233	6.93902	9.19149	7.82474	7.28371	7.67755	7.38941	9.03279	7.94066	7.41294	6.51829	9.66988	3.99437	8.15757	6.2438	10.8416	4.66273	5.81789	6.64787	5.60084	3.48908	7.48076	4.53231	5.76547	4.4511	6.18585	7.11699	4.79219	9.37674
APC2	0.324709	0.287555	0.395602	0.406027	0.419002	0.322067	0.481311	0.439281	0.533242	0.345911	0.395135	0.249333	0.489165	0.183658	0.514565	0.401222	0.400728	0.48753	0.333737	0.409141	0.378918	0.452272	0.450287	0.227065	0.414318	0.437808	0.601878	0.300855	0.296395	0.370695	0.396287	0.39158	0.268438	0.809422	0.279028	0.477806	0.520345	0.259627	0.417759	0.249732	0.359213	0.903787	0.408653
APCDD1	62.6743	78.1221	35.3023	46.8353	54.7277	33.4145	118.024	49.0084	111.992	40.6926	31.386	268.919	59.9622	30.1729	64.857	26.1409	35.4212	167.536	27.7829	29.1439	27.045	14.664	26.5463	75.4799	24.4737	266.499	34.2241	103.761	57.9445	41.0219	394.948	31.5841	152.628	89.6983	91.9928	31.1965	51.5674	46.7261	75.7655	50.3486	21.1486	75.8565	199.063
APCDD1L	1.17774	0.171997	0.525696	1.85388	0.565101	3.56191	2.25501	2.37292	2.43109	3.28522	2.46463	0.440774	0.666665	1.72504	0.915583	2.75664	5.351	9.46798	2.47405	1.35754	1.23928	2.17951	0.488061	3.09231	2.05094	5.75869	4.54907	20.678	7.23628	2.28244	9.58497	0.90205	20.3731	8.10085	0.094373	5.49745	3.29103	3.83137	2.67029	2.10671	2.61448	2.93379	13.7986
APCDD1L-DT	0.140024	0.140276	0.188686	0.165061	0.0489381	0.398677	0.329103	0.223506	0.172221	0.240569	0.429653	0.130881	0.122114	0.316602	0.0842295	0.22922	0.378187	0.739807	0.295003	0.301424	0.186375	0.110361	0.358574	0.272438	0.324146	0.332742	0.42327	0.958044	0.269738	0.376451	0.421789	0.171419	1.0317	0.584337	0.0732795	0.213649	0.35952	0.20313	0.149468	0.111691	0.335131	0.420573	0.964413
APEH	46.1778	36.45	39.3924	39.5766	26.625	44.9401	42.7073	41.8186	42.6227	40.8815	46.6781	42.6713	31.7277	51.2552	41.6	37.6572	40.3165	45.26	48.1421	43.1364	37.2058	38.1206	40.4138	62.6489	38.7166	42.8904	42.8286	34.7215	39.2825	34.5111	44.2355	45.4169	36.7416	41.426	60.0409	41.5893	37.2326	37.8798	33.8686	37.8499	59.0903	46.6962	53.8259
APELA	9.18271e-05	8.38274e-05	9.35396e-05	8.98604e-05	8.4978e-05	9.58231e-05	9.85261e-05	9.47635e-05	0.0795347	9.019e-05	0.000101141	0.130881	0.0153385	0.000103314	0.0169157	8.94826e-05	9.66493e-05	9.72975e-05	9.00623e-05	9.61919e-05	9.22969e-05	0.000106291	9.55554e-05	0.0161402	9.35412e-05	0.000107019	9.8385e-05	9.76526e-05	9.712e-05	0.00010431	0.55673	9.70507e-05	0.000107459	0.000103092	8.86552e-05	9.72288e-05	9.21523e-05	9.95428e-05	0.000102874	9.46079e-05	0.000105181	0.000110453	0.00010788
APEX1	82.7215	86.1079	78.5248	82.0598	62.3206	97.6294	75.5276	93.7618	84.5337	68.6917	114.761	96.9339	64.5118	85.5461	102.919	66.9065	104.746	86.9931	105.077	111.027	133.756	109.445	85.1415	103.35	105.671	89.3047	100.2	74.7843	84.1488	69.2937	94.6465	99.0518	69.5647	89.4447	100.476	100.892	97.076	87.35	79.8917	142.258	94.9931	82.8616	83.5958
APEX2	17.8237	14.727	16.4425	16.5079	13.2161	15.5882	16.3541	15.7048	19.2838	17.3679	21.1514	17.8066	14.565	16.872	14.7443	17.2043	14.6848	16.1751	16.3589	16.4678	12.7137	16.0637	14.4991	22.7934	16.8712	16.618	17.381	13.9056	17.3156	15.5946	20.719	15.2528	14.045	18.707	19.8998	17.117	15.1215	15.6766	14.3456	19.9409	18.8359	16.072	19.438
APH1A	64.0891	69.9531	61.5044	68.8701	44.2672	53.8648	50.6098	63.4585	66.0367	56.2197	56.3267	69.3996	65.1748	39.9003	75.9434	60.8321	44.95	54.4634	52.8218	61.0047	51.2886	46.789	60.4374	44.8	58.9219	54.8362	59.3452	43.5186	55.1545	44.4692	53.1883	61.9138	40.281	47.8278	99.1126	54.1656	57.9417	52.442	44.9066	37.8797	59.9415	51.1073	50.5641
APH1B	15.4844	22.97	20.6192	24.9909	39.7765	18.0156	15.6855	21.3615	18.7535	22.5013	14.988	19.0519	32.0182	17.3427	19.8758	22.7641	16.3337	18.0426	15.271	17.0892	21.4845	16.7687	20.7704	16.6747	21.921	20.4101	17.8563	23.1476	12.2537	20.2828	15.8499	19.6331	20.2855	16.9646	55.7277	20.6535	24.453	15.3821	14.4782	12.7045	15.2436	18.4649	19.5918
API5	24.8995	38.5726	51.7328	52.2987	42.7509	45.7917	47.4033	33.9605	40.6559	21.1919	43.4714	29.2759	28.5919	4.30244	36.4838	37.7011	56.1782	48.4841	43.5151	38.2169	51.2491	48.379	51.0728	10.9569	35.2558	53.4431	52.9474	59.8254	58.1995	63.7191	48.9618	49.6017	68.2041	52.1425	43.6538	54.1366	47.218	52.288	47.6303	30.0328	33.8997	57.198	61.9544
APIP	26.6321	21.2908	21.628	20.7014	26.474	27.932	19.9003	24.229	17.9659	21.8474	22.3474	25.9704	25.2593	27.2308	19.9396	19.1834	19.9786	17.5101	20.925	23.3216	21.2525	17.9799	23.373	21.9895	24.6097	22.8302	18.3889	20.4842	21.5224	24.9104	17.4383	24.8668	24.8604	21.834	18.1249	21.4391	18.5405	20.8542	23.9472	17.3869	22.2133	19.3146	13.6096
APLF	4.3069	5.90567	5.58716	4.9987	5.50827	6.62651	5.34009	6.37746	4.39608	5.35933	5.09745	4.69449	4.72872	4.27283	4.84668	4.69228	5.11427	5.64253	5.70513	5.76396	7.53608	6.0641	5.62254	5.20617	6.29596	6.51583	4.99	5.12595	5.22262	7.88458	5.54956	7.0906	7.06532	5.33124	3.05784	6.2109	6.15265	4.98885	6.9269	4.96613	5.48615	5.46613	6.11468
APLN	0.450985	1.402	0.306557	0.824943	1.36797	0.664398	0.594836	0.345366	1.69493	0.343631	2.13354	1.01744	0.655992	0.615517	1.39685	0.518124	2.28854	3.64704	0.874659	0.896354	0.474267	1.35072	0.622715	1.13744	0.401301	1.48718	0.352741	1.96641	1.10704	1.27968	5.15317	1.09987	1.10367	1.02251	0.203396	0.267037	0.296091	0.20313	0.410857	0.111691	0.732974	0.321641	0.285016
APLNR	7.42936	2.66373	35.9072	19.4336	8.69591	35.0586	15.3112	20.5299	25.9489	16.8605	8.84125	6.43855	34.6079	27.2557	4.35866	19.8602	32.8741	39.738	34.9523	15.1206	41.0648	22.3542	17.4349	19.431	15.4774	12.6598	9.88184	9.07538	10.1879	29.8821	15.2822	25.3756	9.28444	14.7721	3.59426	10.0548	3.62576	6.90895	11.1458	6.69588	22.3968	11.2533	14.7708
APLP1	3.2105	0.11742	2.4404	1.08065	2.2447	1.98512	1.74756	0.108253	2.25784	2.50837	2.19252	0.77512	0.979067	3.21516	1.8387	2.19705	2.58795	1.33966	1.78682	1.33595	2.78404	1.52415	1.63747	2.84097	1.75493	2.34717	1.36299	0.5522	0.626535	0.250676	2.01124	1.13543	1.19256	0.790973	0.82848	0.206923	2.13383	1.75937	2.04741	2.11041	1.26946	3.19897	2.61405
APLP2	46.8091	90.3105	169.767	144.113	96.9188	122.897	145.053	73.4793	102.12	57.5789	92.4088	56.2632	55.8263	5.63654	82.4274	97.9027	169.337	148.064	82.9764	69.6449	101.199	132.064	151.271	27.4784	88.5396	161.577	134.486	150.48	116.8	183.091	163.176	153.037	242.624	151.319	82.5309	126.805	132.954	167.116	190.726	56.2235	128.017	184.128	184.7
APMAP	82.8867	78.8581	67.6342	71.5314	63.9121	74.7507	78.7712	82.0123	75.8178	73.9817	85.1946	78.2355	65.8806	79.5819	72.2783	70.0542	89.6075	75.3301	67.3317	74.8608	69.3481	67.2278	71.3938	87.2856	72.8655	75.3712	65.3977	54.2669	73.2289	51.7102	97.8831	70.1315	80.8602	81.4277	80.7214	74.2805	73.133	86.0271	80.4892	94.0014	91.2737	86.096	85.1
APOA1	0.102892	8.60837e-05	0.279893	0.202187	0.353919	0.344266	1.25032	0.818471	0.669024	0.522444	1.32579	0.171134	0.238398	0.466277	0.130852	0.361492	0.879981	2.64591	0.543298	0.542994	0.155122	0.480439	0.348611	1.85132	0.493538	2.58725	0.314425	0.107722	0.745838	0.745035	1.11603	1.3123	1.42548	1.54404	2.00203	0.326567	0.153226	0.183914	2.77543	0.471587	1.34607	0.272385	1.02352
APOA1-AS	0.0156399	0.0351318	0.0826029	0.0990723	0.134431	0.182779	0.0254065	0.0610251	0.108547	0.0930347	0.0291925	0.130881	0.0916068	0.052853	0.134715	0.143088	0.162175	0.0526928	0.162801	0.0928125	0.118636	0.096579	0.117203	0.0163388	0.123542	0.0979407	0.0882591	0.235383	0.184588	0.231833	0.195738	0.195435	0.192032	0.109647	0.107381	0.160261	0.232663	0.464169	0.320285	0.0372934	0.000105181	0.178851	0.00010788
APOB	0.046736	0.0877038	0.282983	0.181558	0.207711	0.199386	0.177255	0.182886	0.662137	0.0344443	0.472608	0.261685	8.48689e-05	0.000103314	0.134715	0.0897492	1.69155	0.206528	0.213648	0.633658	0.0847663	0.551379	0.415175	0.240401	0.324146	0.371875	0.529063	0.151352	0.383271	0.809251	0.463958	0.226684	0.180036	0.401764	0.0326179	1.65512	0.528662	0.145121	0.22415	0.0744922	0.146679	0.272175	0.306932
APOBEC2	0.108928	0.210372	0.29477	0.0990723	0.464189	0.066526	0.189908	0.223506	0.172221	0.189038	0.10033	0.130881	0.274651	0.052853	0.202029	0.0897492	0.119494	0.137718	0.111954	0.16235	0.152505	0.193052	0.226503	0.144289	0.0618177	0.195774	0.0882591	0.184965	0.0568637	0.150643	0.210943	0.154839	0.12006	0.237448	0.325381	0.178057	0.21152	0.0581083	0.149468	0.0558928	0.230435	0.0495767	0.087772
APOBEC3A	0.532987	0.0495754	0.160812	0.195966	0.0365705	0.105533	0.107833	0.0110333	0.411525	0.726327	0.330123	0.569349	0.485173	0.628389	0.14806	0.0226403	9.66493e-05	0.0387538	0.11925	0.164345	0.0406775	0.253846	0.104698	0.0440892	0.269276	0.384245	0.534447	0.196921	1.64478	1.63887	0.2487	0.317875	0.233363	0.0664615	0.709972	0.3359	0.225708	0.278575	0.234506	0.00988653	0.0351798	1.25902	0.00285381
APOBEC3A_B	0.135926	0.0336197	9.35404e-05	0.000107526	0.00178045	0.0309968	0.0807726	9.48805e-05	0.0873395	0.0617911	0.0810787	0.0768401	9.99069e-05	0.028851	0.0259083	0.647483	9.66493e-05	9.72978e-05	0.0755118	9.61982e-05	0.0923216	0.0778855	0.134978	0.000121546	0.0478514	0.000107721	0.499199	9.76526e-05	0.150949	1.61788	0.308137	0.035527	0.26761	0.138645	0.420056	9.72291e-05	0.0488156	0.254801	0.212463	9.46095e-05	0.000105181	0.283343	0.00010788
APOBEC3B	0.569456	0.814446	0.126856	0.461647	0.210899	1.42045	0.0241426	1.29156	0.222745	1.07329	0.924195	1.11304	0.753212	0.943577	1.18213	0.0180903	0.0053509	0.333662	0.539644	1.12741	0.0110203	0.982123	0.281779	0.497952	0.380549	0.380014	0.234797	0.414155	1.53687	0.608852	0.759702	0.85778	0.187347	0.966096	1.66941	0.230112	0.479244	0.250307	0.0403031	0.178741	0.443524	0.773407	0.0620568
APOBEC3C	57.1236	47.8231	40.7479	93.7694	68.1257	55.6354	59.1449	64.3019	60.167	61.1313	69.7021	60.388	54.9742	77.1202	55.9715	43.1463	49.4503	86.3397	68.1351	75.8884	39.5429	76.0619	62.8658	85.3912	57.6505	87.4047	49.9167	75.3249	76.933	62.3232	58.0333	66.395	56.7737	90.0452	118.805	45.807	58.4177	38.2569	47.4235	18.6181	58.4788	79.9835	98.1839
APOBEC3D	6.78162	6.25491	3.34258	6.92339	7.11654	3.37505	4.05508	3.85482	5.62666	4.80157	4.10494	7.5551	3.32962	2.21148	4.74721	2.9475	3.66956	5.30511	4.13488	4.37333	3.57863	2.81753	3.90924	2.73483	5.20545	4.85033	3.93862	2.9968	3.76714	2.77947	6.10455	3.71675	2.95851	5.09847	6.90243	2.31252	4.8708	5.16211	3.80183	0.935945	2.90869	3.83939	4.90632
APOBEC3F	16.1916	14.5485	10.7235	20.1264	22.2936	11.1505	10.4695	13.9331	13.226	13.629	14.7611	17.0323	19.4894	14.0153	18.2579	12.3743	11.1705	11.3808	12.4426	14.9936	11.5656	13.9889	11.9056	12.6061	13.214	11.2567	11.129	13.784	9.05284	8.09491	8.59425	12.9806	8.70322	13.3647	27.6792	8.38685	12.1068	9.38614	7.9992	10.5089	12.4223	11.7866	12.4105
APOBEC3G	14.5504	10.6702	7.00611	9.99352	19.3689	5.40797	6.20146	7.59457	7.44678	11.5516	8.569	16.9665	11.6907	11.2639	11.2468	6.84058	6.06107	7.23086	7.40766	9.97881	4.98936	6.61513	9.57566	7.54556	6.73657	8.0685	4.18994	8.11292	7.42115	7.45569	13.2909	5.90697	5.81433	7.54543	19.0782	3.77748	7.50693	6.26176	4.42219	6.33643	6.86395	6.19259	6.56877
APOBEC3H	0.129151	0.112196	0.246884	0.10664	0.185368	0.000102281	0.000136106	0.0937933	0.00125771	0.600687	0.000104149	0.492807	0.190087	0.185774	0.0399105	0.216741	0.0596208	0.378546	0.0689706	0.173126	0.10947	0.0336865	0.0805421	0.000166086	0.311568	0.195774	0.0814424	0.149294	0.0852102	0.00025139	1.0013	0.156694	0.000187447	0.352537	0.574628	9.77493e-05	0.370583	0.388842	0.113672	9.46108e-05	0.222286	0.00608883	0.000107884
APOBEC4	0.0156399	0.0526558	9.35396e-05	0.0165869	0.0367248	9.58231e-05	0.0507145	9.47635e-05	0.01333	9.019e-05	0.0144195	0.0727456	8.48689e-05	0.052853	0.151543	0.0200139	0.0796946	9.72975e-05	0.0509371	0.00782255	0.0170271	0.000106291	9.55554e-05	0.000121546	0.0309556	0.0196738	9.8385e-05	9.76526e-05	0.0568637	0.0189217	0.109737	0.0166766	0.0360932	0.0183604	36.2702	0.142465	0.0635206	0.609191	0.0187735	9.46079e-05	0.000105181	0.0495767	0.00010788
APOBR	4.18252	2.48849	1.1788	2.1777	2.57708	3.83644	2.37905	1.70614	4.92572	5.56546	2.59173	9.47612	2.85252	3.63983	2.35607	7.30238	3.36311	2.59768	2.76617	2.66569	3.01449	2.8116	3.13206	5.5746	4.35165	4.01129	5.21921	1.63029	4.85364	3.33078	16.6738	3.63101	2.19524	2.39181	9.05948	2.54492	2.96008	4.58279	2.37127	3.98036	7.09846	4.37787	2.27937
APOC1	1.7829	1.54347	1.1817	0.329983	0.525178	0.698688	1.20258	0.522134	1.69376	0.368382	1.04527	2.63681	0.259109	2.80232	0.558518	0.906516	0.768854	0.592184	3.1201	0.730791	0.389535	0.274603	0.339656	1.02516	1.14357	0.821789	0.28289	0.15009	0.904926	0.0478349	2.22043	0.360229	0.587788	0.715421	9.199	0.497631	0.0929575	2.16188	0.482581	3.80216	2.09371	0.705038	0.327124
APOC2	0.0292529	0.293465	9.35396e-05	0.0474501	0.154125	0.0383969	0.0380605	0.000138223	0.146374	0.0344443	0.0716932	0.633932	0.000150149	0.0780923	0.115713	8.95342e-05	9.66493e-05	0.00758754	0.0979647	0.00346036	0.029587	0.00681191	0.00831064	0.0802146	0.0155246	0.0231389	0.0959364	0.218577	0.117976	0.037739	1.519	0.00170649	0.00900484	0.0878568	5.47191	0.00784587	0.0423778	0.290143	0.0561147	0.300978	0.0720397	0.000110453	0.0220239
APOC4-APOC2	0.0485589	0.109755	0.0236676	0.051712	0.114737	0.0780476	9.85261e-05	0.0609816	0.145105	9.019e-05	0.000101141	0.136513	0.0915415	0.0276138	0.0527464	0.0698248	0.120117	0.0270121	0.0952439	0.0121847	0.106076	0.135186	0.029615	0.000121546	9.35412e-05	0.153176	0.0276854	9.76526e-05	0.0667092	0.00010431	0.184834	0.120071	0.0751769	0.060488	0.521766	0.0279406	9.21523e-05	9.95428e-05	0.000102874	0.145596	0.0328662	0.000110453	0.00010788
APOD	106.038	60.8259	129.245	176.057	188.744	162.439	271.188	408.822	110.35	481.662	189.275	81.7527	192.15	458.747	154.839	325.256	52.5547	161.515	291.557	119.921	167.756	135.089	131.467	227.833	181.346	184.554	266.14	223.723	139.206	163.655	234.916	115.04	120.804	200.703	97.3845	247.435	164.259	136.118	167.14	55.8355	270.512	176.05	117.119
APOE	23.7566	8.80928	22.5061	5.34501	3.09549	20.0424	48.186	8.11479	22.5494	9.54913	9.48296	28.7181	3.46497	51.1783	15.0129	16.9088	23.3054	24.2464	52.9059	14.2236	19.4956	36.0545	10.3673	39.1781	20.7	21.9467	24.77	11.8501	32.6814	12.5499	115.53	17.8754	22.0898	22.0139	57.6099	25.428	12.6572	38.4181	40.2039	74.6905	85.6952	35.9405	13.3713
APOH	9.18271e-05	8.38274e-05	9.35396e-05	8.98604e-05	8.4978e-05	9.58231e-05	9.85261e-05	9.47635e-05	0.119258	9.019e-05	0.000101141	0.62503	8.48689e-05	0.000103314	0.0169157	8.94826e-05	9.66493e-05	9.72975e-05	9.00623e-05	9.61919e-05	9.22969e-05	0.000106291	9.55554e-05	0.000121546	9.35412e-05	0.000107019	9.8385e-05	9.76526e-05	0.0568637	0.00010431	9.71798e-05	0.00562356	0.000107459	0.000103092	0.0244856	9.72288e-05	9.21523e-05	0.0291039	0.000102874	9.46079e-05	0.000105181	0.000110453	0.00010788
APOL1	38.6394	29.564	43.6036	33.8575	30.1377	25.3976	34.9955	31.3109	37.9719	43.9462	24.1003	54.6286	38.4362	44.0027	28.3439	31.7762	26.9105	34.6304	35.7853	22.1981	28.3243	21.8043	32.8786	45.7785	36.1003	30.1898	32.2375	25.257	38.1941	25.8671	57.1089	23.3534	23.2262	29.7134	78.3795	28.3289	29.4855	35.5896	20.5202	25.7863	56.8623	37.9153	31.1636
APOL2	51.7309	54.1569	42.5299	34.478	43.9992	38.5316	43.2979	45.2261	38.3569	60.2328	25.0919	41.647	42.7147	65.4149	45.6306	44.2961	30.0995	44.471	41.5616	48.7018	47.3675	30.0728	37.9326	43.7929	43.0997	37.946	49.1205	43.557	50.8299	25.4901	40.7971	43.2591	27.7856	42.5416	37.4753	47.7434	44.0715	47.7144	32.2375	75.2652	58.6903	48.4586	43.6244
APOL3	80.5111	44.6815	58.6347	49.2834	56.511	38.4813	48.2698	36.3977	35.7813	61.4411	28.723	34.5678	54.6687	61.5853	52.2769	40.6448	27.0625	35.4173	47.6731	48.3049	33.9804	24.6131	43.247	35.9886	41.2978	50.8607	34.9427	35.7175	30.037	23.992	21.1125	36.78	34.3637	31.0158	22.4942	43.7854	48.0814	15.5999	32.4108	34.8783	53.4162	19.983	25.0316
APOL4	1.38184	9.33637	3.42731	3.6712	7.81344	1.25055	1.03154	3.68015	8.93026	2.42591	1.01924	21.103	2.70584	3.54873	2.73327	4.56698	2.78991	5.19448	1.82342	1.63842	4.56181	2.78746	1.63341	1.18589	4.2007	0.758594	3.68537	1.77528	13.3356	1.72308	10.6138	3.97771	0.248616	1.46962	11.0207	1.47384	3.51054	6.25576	3.57207	0.893911	3.24253	3.48347	1.64899
APOL5	9.18271e-05	8.38274e-05	0.0354547	0.0165869	8.4978e-05	9.58231e-05	0.0380605	0.0204049	8.90469e-05	0.0172673	0.000101141	7.66278e-05	0.0458458	0.000103314	8.72566e-05	0.0100517	9.66493e-05	0.0517049	9.00623e-05	0.00782255	9.22969e-05	0.0138881	0.0189628	0.064196	9.35412e-05	0.000107019	9.8385e-05	9.76526e-05	9.712e-05	0.037739	9.71798e-05	0.0608886	0.000107459	0.000103092	8.86552e-05	9.72288e-05	9.21523e-05	9.95428e-05	0.000102874	9.46079e-05	0.0629225	0.173242	0.0439399
APOL6	35.7917	44.4234	42.8107	47.3302	50.8561	33.5473	30.762	28.942	33.8572	30.2833	22.6805	53.5281	41.8714	25.32	28.945	30.7235	37.053	51.9518	36.5998	29.6539	25.5208	29.6448	36.9233	23.9319	33.7169	42.1077	26.6952	66.8715	45.6546	42.6591	50.9826	30.1748	37.4733	34.6707	45.7525	29.3101	40.0657	34.9504	34.1487	22.3194	30.2152	30.7928	41.7501
APOLD1	9.91281	21.0444	337.063	47.1056	16.4761	108.417	146.777	68.3377	53.6078	95.544	133.342	17.5538	69.2726	196.583	38.5785	126.725	48.593	19.5382	74.4385	87.3197	80.3748	93.07	26.9395	84.4875	57.8067	20.9056	252.909	66.7671	77.4571	216.988	22.1073	49.2728	292.511	24.4914	147.364	212.002	92.3252	120.148	195.531	17.6306	36.3261	263.405	36.8971
APOM	1.27329	1.10951	1.05271	0.479329	1.92448	0.917885	1.13178	1.521	1.51726	0.498422	1.07281	0.907618	0.848829	2.14256	0.987024	1.08388	0.433651	0.926959	1.49511	1.78759	0.974735	1.26431	0.856086	1.49175	1.01574	0.519521	1.20625	0.385963	0.682005	0.992317	0.632483	1.22944	0.52068	0.823554	1.20469	1.11075	1.4496	1.03207	0.333003	1.1334	1.31938	0.21918	1.29344
APOO	5.11202	4.05612	3.27997	4.70761	4.10391	3.34797	5.33566	3.3257	3.79027	3.56394	7.25854	4.90596	3.48223	5.52395	4.0837	2.97475	4.55396	4.65378	4.53997	5.5618	5.30637	4.16946	3.07765	7.99663	4.16285	4.564	3.56201	4.14844	5.382	3.96607	6.03444	4.32958	5.90669	4.4783	7.98273	3.93258	3.58702	5.88648	7.66793	7.917	3.64472	4.07697	5.06763
APOOL	20.85	27.3726	30.8115	29.2494	32.7439	27.0206	28.8133	25.7127	24.1913	22.9658	27.3422	23.1234	27.5445	14.5063	23.6881	22.166	34.2642	31.4808	24.7423	22.4285	29.6699	31.5191	30.4707	16.8419	23.5787	27.2174	25.1788	36.0827	26.1411	38.03	24.6691	27.444	38.6968	19.5482	32.0405	30.5202	28.86	27.9893	28.7902	21.2778	21.8605	33.7361	28.469
APP	291.381	340.049	785.308	383.923	333.166	529.42	552.367	336.209	431.833	337.085	349.87	341.189	308.311	114.627	337.092	483.722	455.698	465.793	412.807	345.39	450.273	489.311	451.228	207.662	425.838	436.551	549.746	475.839	392.372	511.773	452.928	383.15	586.762	416.648	225.165	686.455	536.566	528.355	471.535	413.009	474.531	630.976	406.448
APPBP2	38.3888	54.9566	58.8631	46.5179	49.0029	53.2704	54.866	38.9512	43.3977	34.5689	42.4099	31.7051	44.6898	23.4427	42.9085	48.2515	56.7775	54.471	45.0208	34.7442	61.9341	63.635	55.0832	26.6008	42.516	52.0136	55.6381	77.5143	63.9483	62.035	57.6065	53.1969	93.7296	52.6459	44.9005	62.0035	59.6885	57.3746	76.4274	33.4515	31.1665	58.3072	67.7424
APPL1	49.368	65.0767	73.0186	63.7625	64.4332	63.0787	49.0262	52.1811	55.759	44.5341	54.1015	50.1785	57.0322	38.3557	60.1307	58.2721	76.8056	55.7246	56.409	54.1713	73.9618	59.2565	66.6393	38.8639	61.1705	60.2702	58.3472	87.8861	62.4942	78.4194	68.0157	65.925	74.06	62.0837	50.1042	67.1273	62.8869	64.8954	63.443	46.405	40.8234	59.879	67.0871
APPL2	48.0872	54.9237	53.4092	48.2875	69.007	48.2007	53.7558	53.4639	48.3318	49.17	40.2452	48.3622	59.7846	43.0554	50.7486	48.1213	50.9938	47.9611	54.1627	52.5905	56.8049	63.2305	54.4687	54.6986	62.3306	55.9584	49.2745	55.9223	44.1757	63.4663	50.0157	57.3844	53.1449	65.8441	54.4453	64.5903	61.3541	62.4288	49.2448	47.3143	60.6492	54.8057	67.7529
APRT	27.4564	18.7969	15.6114	26.9866	14.9502	18.7884	21.793	22.6966	22.937	29.2848	27.3496	20.6945	17.0798	44.4647	18.6333	20.126	18.261	16.7806	24.2019	25.6119	13.9317	12.6774	19.1875	41.6955	21.039	20.982	20.896	11.5543	20.2775	15.908	19.3278	20.7333	14.2198	18.9078	33.776	17.1283	17.0318	17.5128	16.6448	21.2678	34.3237	20.423	21.6452
APTR	7.91371	6.70776	4.16991	4.62562	7.639	3.26872	4.80628	4.45252	4.03735	5.21082	5.15936	6.7972	6.22397	7.07878	6.17591	4.47968	4.71197	4.27902	4.60953	5.31984	3.70007	5.0953	4.38284	7.53212	3.98468	5.6336	2.33456	4.57546	5.8016	4.68575	5.15704	5.45775	4.8717	5.43017	6.19039	5.01859	4.56361	4.95099	6.39415	4.38771	4.56145	4.94427	6.1959
APTX	3.27048	1.67344	4.1381	3.21533	3.11836	3.27813	4.67337	4.16985	3.45315	3.66194	3.38423	4.83594	3.73139	4.87469	3.57985	2.47279	4.02545	1.91079	2.39102	2.81514	1.63079	1.41265	3.94101	5.51666	4.00005	4.01642	2.24761	3.77412	3.0469	1.43005	2.51437	3.96047	3.45475	3.09971	2.19936	3.05736	4.51301	2.49512	1.333	2.91757	4.03479	2.49264	4.39483
AQP1	406.345	231.791	950.151	718.534	405.623	377.189	638.411	522.206	412.585	836.04	215.157	188.476	484.248	643.303	400.89	847.01	393.133	388.347	647.42	330.491	483.366	559.921	651.263	453.296	834.714	396.566	602.13	440.1	365.983	700.286	227.322	613.928	408.971	287.637	85.5889	412.38	308.118	336.54	531.723	275.588	523.23	329.917	431.897
AQP10	0.279957	0.0526558	0.0118806	0.0660781	0.0489381	0.182779	0.0886765	0.040715	0.0398119	0.103153	0.128967	0.043678	0.0305922	0.123186	0.0505726	0.179409	0.0398956	0.0517049	0.0916147	0.0232753	0.16944	0.0690154	0.113299	0.0802146	0.138973	0.156641	0.0177305	0.0505159	0.0852469	0.0941911	0.0338325	0.0664151	0.108065	0.0183604	5.87975	0.142465	0.126949	0.0291039	0.112127	9.46079e-05	0.000105181	0.0248436	0.065856
AQP11	1.53014	2.25216	0.938995	1.73082	2.53453	1.14597	1.06494	1.56348	1.1317	1.59742	0.900161	1.14753	2.20511	1.0551	1.1811	0.670395	1.13437	1.0523	0.948164	1.05384	0.805509	0.949647	0.829004	0.642386	1.01136	0.750952	0.565571	1.37816	0.688208	1.26076	0.698805	0.809553	0.785558	1.14281	0.968055	1.00857	0.969433	0.703365	0.821507	1.7111	0.994748	1.18729	0.915241
AQP12B	9.18271e-05	8.38274e-05	9.35396e-05	8.98604e-05	8.4978e-05	9.58231e-05	9.85261e-05	9.47635e-05	8.90469e-05	9.019e-05	0.000101141	0.506197	0.00507465	0.000103314	8.72566e-05	8.94826e-05	9.66493e-05	9.72975e-05	9.00623e-05	9.61919e-05	9.22969e-05	0.000106291	9.55554e-05	0.000121546	9.35412e-05	0.000107019	9.8385e-05	9.76526e-05	0.0793547	0.00010431	9.71798e-05	9.70507e-05	0.000107459	0.000103092	0.00141878	9.72288e-05	9.21523e-05	9.95428e-05	0.000102874	9.46079e-05	0.000105181	0.000110453	0.00010788
AQP2	0.0156399	0.105228	0.0236676	8.98604e-05	8.4978e-05	9.58231e-05	9.85261e-05	0.0204049	0.278149	9.019e-05	0.0573748	0.101813	8.48689e-05	0.000103314	0.0674011	8.94826e-05	0.0199961	0.0689075	0.0102595	0.0155489	0.0339619	0.0827972	0.132166	0.0962333	0.0926798	0.0588072	0.0177305	0.0505159	0.0852469	0.0565564	0.126605	0.00562356	0.0360932	0.054875	0.0407502	9.72288e-05	0.021235	0.0291039	0.0747854	9.46079e-05	0.0629225	0.222708	0.2631
AQP3	2.93007	5.60769	3.85414	8.99095	6.10991	3.28839	6.43979	8.04064	11.8359	6.42186	5.55405	17.4519	12.0868	5.03392	4.08688	16.9852	1.89038	8.58011	5.5893	2.66282	4.09721	3.39011	4.56572	9.68374	5.89922	7.20039	5.78233	7.20374	15.3688	5.11842	19.5071	3.26202	6.65529	4.78331	47.8954	4.27103	3.40002	17.0775	4.55435	4.25187	7.59833	12.8445	6.28703
AQP4	9.18271e-05	0.00567801	0.0204767	0.0369543	0.0312757	0.00539745	0.0283753	0.0130619	8.90469e-05	0.0220239	0.004672	0.0186351	0.024432	0.0169426	0.0170945	0.0128104	0.0255067	9.72975e-05	0.0332203	0.0395599	9.22969e-05	0.0265037	0.0181645	0.0308033	0.00994564	0.0750624	9.8385e-05	0.00546266	0.0185032	0.0301396	0.0108665	0.0265604	0.0537169	0.0292445	4.69322	0.0114593	0.0203404	9.95428e-05	0.0716255	0.0238445	0.0996804	0.0237971	0.00010788
AQP4-AS1	9.18271e-05	8.38274e-05	9.35396e-05	0.0495811	0.0977911	9.58231e-05	0.0254065	0.0204049	8.90469e-05	0.0344443	0.0144195	0.0146104	0.0305922	0.000103314	0.0842295	8.94826e-05	0.0199961	9.72975e-05	0.0204289	0.00782255	9.22969e-05	0.0414517	9.55554e-05	0.0802146	9.35412e-05	0.332742	0.0353627	9.76526e-05	9.712e-05	0.00010431	9.71798e-05	9.70507e-05	0.0600838	0.000103092	0.25219	0.0178932	0.021235	0.0291039	0.0187735	9.46079e-05	0.0210443	0.000110453	0.109688
AQP5	0.217764	1.75248	0.29477	0.0495811	0.0122982	0.299032	0.227871	0.304746	3.32357	0.189038	0.329424	7.17978	0.305158	0.527601	1.31271	0.219258	0.378187	0.430161	0.772965	0.455951	0.271049	0.647851	0.358574	0.432624	0.339577	0.0588072	0.493798	0.201771	0.19878	0.357634	0.362752	0.425638	0.0840743	0.310477	0.626277	0.284833	0.0846634	0.261139	0.149468	1.33925	1.21457	0.445306	0.109688
AQP6	0.0156399	0.403136	0.0472418	0.033084	0.0122982	0.066526	0.0380605	0.101645	0.225185	0.12033	0.0573748	0.523294	0.0610995	0.052853	0.134715	0.0897492	0.119494	0.0345024	0.0509371	0.0773598	0.0339619	0.000106291	0.0944319	0.128271	9.35412e-05	0.0392405	0.0882591	0.0169037	0.0710553	0.0941911	0.0169648	0.0222031	0.0121027	0.0183604	0.0488825	9.72288e-05	0.0423778	0.0871126	0.0747854	0.316284	0.104801	0.0495767	0.0220239
AQP7	4.28045	1.56647	3.38009	5.15374	3.5777	3.88178	3.91104	3.83629	3.88606	6.40975	0.228025	0.705797	3.71441	4.85904	0.98879	4.65494	2.35079	3.39212	3.21448	4.49825	3.38941	2.04723	0.0992971	3.9845	1.64429	2.50458	0.862106	2.66079	1.87575	2.31671	1.34883	2.47371	0.38203	3.71499	7.54482	0.686935	0.911246	0.668299	1.0912	0.0509459	2.56934	0.16382	1.11523
AQP7P1	0.314223	0.364113	1.47336	0.491378	0.947217	0.284979	1.32101	0.396455	0.908765	1.33304	0.663614	0.452797	0.555222	0.675231	0.426444	1.50069	0.624893	0.173678	0.655057	0.711482	0.809431	0.691816	0.400835	0.451594	0.848247	0.4533	2.34029	0.524254	1.98532	0.392529	0.204766	0.484766	1.9266	0.298949	0.139376	1.50319	0.737111	0.563747	2.08025	0.714687	0.601042	3.5309	0.134487
AQP7P3	0.155572	8.38322e-05	0.214201	0.176331	0.0888791	0.0333109	0.151034	9.48255e-05	0.234672	0.415215	0.137558	0.0935082	0.160948	0.267369	0.269339	0.156639	0.0598316	0.172122	0.144157	0.0580439	0.186375	0.0644214	0.132166	0.367215	0.150546	0.137074	0.433615	0.151352	0.465784	0.411443	0.126605	0.1034	0.36016	0.109647	0.0880473	0.872101	0.223265	0.261347	0.615825	0.260408	0.271149	0.631482	0.00010788
AQP8	1.60154	2.59364	0.188686	0.0660781	0.329843	3.305	0.177255	0.243816	0.29139	0.240569	0.5442	3.47366	0.350919	0.263852	0.437627	0.0698248	0.27869	0.137718	0.0712759	0.324603	0.152505	0.220615	0.0566974	0.320494	0.463025	0.137074	0.317477	0.0337098	0.142013	0.0753737	0.26998	0.226684	0.0840743	0.219191	0.0570148	0.178057	0.21152	0.464169	0.20548	0.539477	0.12574	0.173242	0.0220239
AQP9	0.00255718	0.000543165	0.230179	0.207691	0.00925781	0.00874473	0.251591	0.177326	0.810895	0.719294	0.23926	0.0609023	0.142062	0.204894	0.00697633	2.91758	0.000357451	0.00248502	0.00351589	0.169362	0.0126975	0.00758475	0.210402	0.260033	0.284374	0.0031843	1.54108	0.200247	1.50961	5.32682	1.12213	0.693843	1.37462	0.00227512	26.1316	1.11046	0.1896	1.20539	0.341606	0.000582133	0.00945561	2.62997	0.00418609
AQR	44.7163	53.4132	57.6741	51.8339	51.9431	51.1347	44.694	47.7085	48.3428	40.1085	53.5223	46.1449	45.1814	37.5579	48.8363	46.4339	62.5044	53.0872	50.8573	44.0558	55.2075	57.6356	54.9038	38.5569	47.2191	44.2992	49.6346	63.0229	51.8847	62.6243	53.5549	45.9751	63.611	48.948	63.0011	48.0671	49.0303	55.3984	53.6221	48.2283	40.8942	51.9396	54.9217
AR	93.5778	105.755	40.8944	123.151	202.196	81.9065	79.2103	98.7185	76.5132	120.277	160.33	86.5459	151.968	79.6211	117.833	51.3589	82.9112	74.8575	84.3695	98.3884	117.58	111.512	88.3097	89.7827	107.264	99.4742	92.6514	95.0244	54.6061	78.9151	23.8245	98.7745	49.2992	78.9711	110.203	32.2256	103.226	76.4335	57.1334	93.4335	76.9445	84.7102	86.3091
ARAF	71.4864	53.2315	63.3865	53.2599	51.7011	58.0027	64.9727	65.6556	60.7711	72.8371	62.801	53.4121	53.5946	87.5745	56.0992	64.6903	49.6985	53.9931	58.5217	57.3769	54.7848	61.6292	61.9592	84.0475	60.855	68.7923	68.7758	46.9008	56.9872	46.4024	51.807	52.2997	47.4881	55.9929	66.9226	57.5608	64.6099	58.4734	55.136	60.9511	77.7303	61.233	64.8637
ARAP1	91.6585	81.0358	56.7023	78.3407	67.912	69.0146	68.3578	77.3066	71.3612	74.4813	63.6595	77.9862	66.9998	54.9775	77.8238	61.6487	41.7745	70.5626	60.903	60.9311	60.7633	56.0306	68.7258	52.3794	56.4805	73.7916	83.3268	44.0662	43.2469	37.3645	48.8053	61.8881	60.1673	58.1233	116.599	57.1189	64.6458	47.7303	57.0124	47.2008	63.0603	85.0617	64.4747
ARAP1-AS2	0.485846	0.354274	0.969115	0.684089	0.557501	0.538346	0.604437	0.348239	1.02	0.399138	0.217687	0.660455	0.662822	0.213713	0.799812	0.758778	0.822136	0.522207	0.585445	0.445904	1.66033	0.879789	0.591448	0.338169	0.844939	0.453495	0.854112	1.10512	0.587007	0.473278	0.944048	0.744307	0.653255	0.593459	0.496671	0.814552	0.559607	1.12288	0.495022	0.361549	0.404169	1.52231	0.509022
ARAP2	6.31525	7.53848	11.5434	6.06072	12.8237	6.80145	6.9405	6.61967	6.82714	9.31266	6.19322	9.26248	8.40887	4.81843	6.08193	11.7482	5.79787	7.40949	7.51987	5.46034	6.66312	5.65117	7.39344	3.86759	11.3444	5.55549	10.638	11.5944	11.0924	9.72769	11.8666	9.95999	13.8611	4.3979	14.5417	5.8543	10.6188	10.1345	14.8599	4.22956	6.01863	9.30448	4.89707
ARAP3	58.5229	49.26	98.7992	58.4327	74.843	59.4385	55.2221	51.9533	50.3687	55.9458	53.508	41.4796	70.1516	60.1875	56.9644	64.1666	57.6688	48.5973	62.4301	49.3947	67.9933	50.1383	64.2809	44.5479	64.8722	52.7129	62.1181	48.9226	40.2192	42.151	47.432	46.4725	49.8404	42.211	36.4328	64.7597	51.5462	51.7729	47.5542	83.0464	58.0014	34.8243	41.0488
ARC	2.09908	1.99782	1.26131	1.97974	1.99085	1.72728	0.873224	0.99529	3.05875	2.23311	5.35518	6.10427	6.28459	3.464	1.29588	2.60022	0.557283	0.602186	0.640763	2.57297	0.880702	7.22178	2.50944	1.40976	0.864232	0.900177	8.56932	0.42025	5.06651	2.63453	3.33146	0.701963	0.875762	0.83994	18.7125	0.658549	1.18409	31.7599	1.88584	1.46945	1.61242	1.65723	0.48226
ARCN1	69.1739	88.8914	133.625	140.714	109.923	115.349	113.237	91.7619	119.743	78.0473	124.448	83.1722	84.5897	24.6922	91.5209	103.181	157.107	145.528	117.668	99.0472	112.85	194.239	133.023	55.4163	117.447	159.875	141.221	160.832	196.165	196.043	161.441	129.477	209.271	151.696	122.746	147.752	123.389	150.1	163.374	77.263	86.2249	178.78	172.342
AREG	0.202216	0.280468	0.943058	0.165061	0.0245115	0.166171	0.746684	0.528157	0.741582	1.59756	4.69654	3.9242	1.98306	2.37384	0.117886	3.08837	9.66493e-05	0.0517049	0.162801	0.146897	1.08392	0.261961	0.0189628	2.1306	0.740784	0.0392405	3.96733	0.11774	6.69855	1.99474	0.312149	0.0995742	0.719823	0.000103092	5.39181	0.409405	0.126949	5.45292	2.29659	0.260486	0.167618	5.73819	0.0439399
AREL1	27.9555	26.5139	33.3928	33.9181	26.9303	37.3837	32.1792	26.6266	32.3345	22.0554	36.9273	28.0503	22.1636	24.2122	26.4376	32.4071	42.9432	37.5361	37.4032	32.6826	36.647	68.9918	39.678	32.4859	32.0195	37.2747	41.8235	38.2339	40.5882	37.8606	47.0693	34.2368	42.0195	36.9164	53.527	35.5743	33.6806	47.2772	52.7446	39.1518	30.4456	38.0396	45.0595
ARF1	302.385	263.428	252.629	258.226	214.98	263.946	303.407	301.563	288.053	292.235	318.039	244.987	235.756	376.613	251.202	286.165	239.994	263.181	265.161	288.581	248.679	307.922	284.988	437.81	278.458	315.064	286.942	210.712	312.085	263.696	294.993	268.965	273.079	295.185	283.086	279.156	281.149	301.127	279.786	368.03	346.023	299.636	320.888
ARF3	113.594	99.9745	167.011	151.46	109.236	160.213	150.937	143.796	152.774	133.603	141.108	115.297	104.884	132.859	117.109	147.162	165.584	176.326	163.636	132.113	149.704	172.907	149.806	163.07	142.382	179.858	180.112	153.087	155.668	152.647	145.104	164.59	161.204	154.019	164.777	176.216	158.698	169.792	160.997	116.097	140.606	161.285	171.011
ARF4	105.711	97.2232	91.7741	112.065	89.792	117.033	115.05	132.767	132.052	96.518	180.527	118.16	82.0647	131.962	85.842	117.235	167.614	138.446	127.331	134.725	120.864	168.772	115.619	225.174	129.991	146.555	126.07	128.432	225.562	192.69	190.529	126.601	162.032	151.426	95.9532	112.524	102.606	173.098	147.423	159.211	120.756	155.843	152.711
ARF4-AS1	0.544265	0.000131184	0.107003	0.430179	0.662186	0.182776	0.342651	0.14524	0.345289	0.157118	0.000718595	0.0936133	0.307298	0.528842	0.208964	0.0130944	0.179189	0.242144	0.0218179	0.0834601	0.0389098	0.0758659	0.169898	0.130568	9.35891e-05	0.0630708	0.123522	0.201768	0.0578815	0.169458	0.0181168	0.021982	0.00327836	0.0110382	0.378157	0.160259	0.0306051	0.116115	0.280158	0.188707	0.25588	0.0068612	0.0252256
ARF5	82.4047	61.6846	65.9958	70.987	50.1966	90.0296	85.4399	94.8279	82.3588	95.5389	105.083	70.7216	66.8568	131.523	75.2738	87.6275	75.3197	76.8955	98.0738	110.564	81.7105	104.067	82.6764	179.248	91.2902	90.0854	98.0524	55.6282	87.6902	71.205	92.6373	97.2776	74.8625	106.897	96.5469	75.1703	84.8462	74.0773	79.3129	107.932	157.043	97.6464	103.268
ARF6	59.2226	55.0605	60.7624	69.9972	60.7977	58.5251	75.4559	73.2586	74.7055	70.9242	83.6053	66.0853	62.4028	78.1752	51.1418	79.5582	76.7524	77.2395	67.0673	68.5638	60.1525	77.2058	81.3935	105.611	74.1	90.3201	78.3573	76.619	99.0009	108.068	98.2542	62.2175	93.2393	82.1215	121.847	73.284	60.2359	87.1582	86.3704	64.354	87.1696	82.2871	84.6398
ARFGAP1	28.166	36.7905	35.5393	48.1256	31.5915	37.3137	37.0585	38.0504	35.3924	36.7782	34.0203	37.6284	31.692	12.3746	35.9396	33.9969	37.8928	39.4635	37.3321	34.2671	32.3041	42.2219	37.2343	28.6361	34.6522	48.6007	39.9039	25.819	40.3849	26.6789	38.3922	41.5816	35.572	43.9044	36.0357	32.8338	36.2463	32.9093	33.1063	27.1943	44.6295	41.3624	44.8084
ARFGAP2	127.949	112.805	97.9493	92.6245	91.824	81.5237	93.4939	102.029	81.9713	107.364	97.7897	84.4268	101.49	128.943	95.2048	88.6006	77.3218	85.975	86.4386	90.3135	84.3741	80.9174	93.3166	110.867	84.6018	101.666	82.5468	67.1001	71.0858	57.2216	66.0279	85.2341	70.4534	81.1797	85.3466	80.3803	89.5311	77.4765	78.8319	102.36	117.46	87.158	103.706
ARFGAP3	32.3604	45.8763	54.1519	47.3217	38.1763	36.3453	42.4226	53.3581	51.9861	37.6038	42.4325	52.084	32.9876	22.9575	37.2262	45.5024	55.4345	48.0257	43.308	42.553	49.3803	50.3675	48.0016	33.0148	42.9495	53.6564	57.8513	58.9073	81.4829	66.9139	75.079	47.2485	60.224	49.9414	34.7698	51.215	47.1533	68.7673	57.0838	58.2346	46.553	57.2033	75.0879
ARFGEF1	38.6681	52.502	66.4555	42.8595	42.2091	59.0731	50.73	48.8459	48.3031	40.1772	44.2869	47.7727	39.9799	33.0742	47.49	50.3789	72.3945	55.5127	52.4946	47.015	63.8612	58.118	56.8283	38.3968	57.419	51.9498	54.4482	74.9552	62.4717	65.6539	68.4238	60.0401	89.3288	55.8675	79.2901	64.1546	63.3016	67.6673	69.9776	45.7174	40.5801	56.8862	56.6092
ARFGEF2	43.3325	59.7745	95.6992	47.0002	52.3706	66.2808	60.4103	46.1649	52.0635	40.5723	46.091	48.5139	41.5358	26.1464	51.9159	64.6248	79.419	64.7677	57.742	43.3527	76.8333	66.1941	62.9036	37.3235	57.3727	66.6053	74.637	91.8789	69.8371	68.2883	87.0204	53.2701	137.442	54.8633	57.4467	109.214	104.467	91.7119	90.7207	55.6867	43.5325	77.4394	74.5803
ARFGEF3	5.76842	7.00968	13.013	7.35778	6.39984	14.6978	4.8972	9.28181	7.86521	10.7358	5.94224	10.6824	6.46763	3.48158	11.881	9.54387	10.7657	4.67919	7.13901	4.68227	6.87562	5.98141	8.35829	2.43495	7.76191	4.63742	5.76581	8.40314	6.69855	8.41146	6.15679	6.18426	9.11651	4.67398	41.7595	10.0014	6.80807	10.7607	7.59905	5.44972	5.7793	5.58979	3.19985
ARFIP1	23.6441	17.5081	18.791	14.3722	18.2879	17.5165	19.169	18.1768	15.4765	16.3719	18.9884	16.6774	19.1461	7.18803	17.4837	15.4806	17.897	19.2191	25.1142	16.5877	18.6913	17.2856	22.9127	11.8053	18.2088	16.0688	8.72767	27.1184	14.8297	23.4476	11.3677	18.5293	18.3491	18.1395	18.0452	17.0891	17.1436	18.2004	12.9203	20.7217	14.4677	14.3052	14.9151
ARFIP2	10.0998	8.21999	12.4162	14.7363	5.1403	10.7876	13.0742	15.6759	8.72115	9.31702	9.24908	15.2655	4.50327	5.87243	12.0784	9.9474	11.3497	11.6475	10.4657	11.6004	11.7986	11.8896	10.287	13.5378	12.8262	13.75	9.63015	6.61726	13.9386	4.18936	8.74252	11.4271	9.38138	14.9068	19.4143	11.3959	11.3978	4.56887	6.76648	11.1302	11.5933	9.97997	10.1304
ARFRP1	13.7632	8.92867	11.6266	12.1726	7.03641	9.64607	12.1695	11.4314	8.29316	11.5045	9.31378	9.27351	9.17458	12.6587	10.1848	9.61223	8.38813	8.97042	12.0638	10.6085	11.416	9.13192	11.6792	17.2651	10.9332	13.4494	12.5492	7.23424	7.1103	7.09681	10.7905	11.05	10.9997	9.98372	9.30664	13.7271	10.0443	7.82063	10.1578	17.8715	16.3613	13.8891	14.9771
ARG1	0.0777501	0.070106	0.0589667	0.0660086	0.244093	0.066456	9.85261e-05	0.0203835	0.026543	0.120203	0.100224	0.0726691	8.79071e-05	0.000103314	0.185005	0.000306494	0.0796107	0.137573	0.0102488	9.70105e-05	9.22969e-05	0.110245	0.0377903	0.0481268	0.0155083	0.0391992	9.84065e-05	9.76526e-05	0.113511	0.0117894	0.0674967	0.0166591	0.0240962	0.0730554	8.87733e-05	0.148479	0.105695	0.0290733	0.0116969	0.0372542	0.0210222	0.000857631	0.0876796
ARG2	4.43477	4.93755	3.12951	2.88028	3.50163	2.65834	7.11031	4.987	4.00292	5.08096	9.9785	10.488	2.67564	3.50334	2.68164	5.5169	1.44547	4.43997	2.14884	1.48118	5.78859	2.78707	3.33695	7.0732	1.59404	5.66985	4.00123	1.85208	23.4431	2.57302	6.64617	2.72299	8.33036	2.67078	3.15906	2.72784	2.65354	24.9897	10.2354	4.27211	4.26467	4.28912	3.15784
ARGFXP2	0.0933801	0.0526558	0.141538	0.0660781	0.0611513	0.116349	0.0380605	0.162576	0.0662938	0.0516214	0.0716932	0.189016	0.0763531	0.000103314	0.101058	0.109674	0.0398956	0.08611	0.122123	0.139171	0.16944	0.0552335	0.0566974	0.0321588	0.108111	0.0979407	0.0353627	0.151352	0.0710553	0.0753737	0.143472	0.154839	0.216022	0.0366177	0.0732795	0.106873	0.0423778	0.261139	0.112127	0.0744922	0.000105181	0.148509	0.0439399
ARGLU1	251.785	236.574	180.165	174.044	217.604	203.559	198.25	196.338	169.537	223.937	167.984	180.248	189.283	232.908	193.999	199.194	184.946	175.862	173.816	181.446	208.992	189.004	199.163	201.514	179.124	152.777	190.974	189.774	193.574	183.488	141.309	160.965	169.397	176.53	223.191	203.711	225.171	209.238	214.358	250.162	201.141	200.313	201.233
ARHGAP1	154.781	131.535	163.121	144.63	107.746	158.336	195.201	155.636	168.16	149.956	157.603	99.2224	121.419	169.397	117.328	143.774	197.821	226.093	161.307	194.233	133.142	214.555	174.107	256.971	188.135	238.049	176.78	187.623	179.439	210.096	177.988	167.713	167.61	255.329	77.3302	195.667	174.386	190.211	182.169	154.896	173.208	245.501	268.515
ARHGAP10	18.4712	22.904	27.9236	18.5593	19.5047	11.642	25.1183	21.9553	28.5211	25.508	18.7858	19.548	19.7536	20.8714	26.3871	19.2769	17.7703	16.8586	16.2406	19.8955	17.9849	15.4495	20.3767	29.5064	28.5012	24.439	28.7229	20.7724	23.1041	32.5165	16.6063	18.7018	12.4032	14.5694	15.8906	30.9651	21.7772	19.085	16.0008	20.0688	29.2102	46.5478	21.2806
ARHGAP11A	0.355594	0.59594	0.79474	0.744723	0.964678	2.41014	0.854126	0.601046	1.57966	0.795478	0.486625	2.04456	0.317406	0.00115772	1.33102	0.994378	1.12891	1.23702	0.999771	1.38662	1.04227	0.864885	0.699425	0.772827	1.13484	1.46958	0.972381	1.32588	1.63521	1.13536	5.52733	1.26775	0.524833	0.716464	2.98517	1.82623	0.978199	0.594102	1.52849	0.694075	0.574262	1.74229	1.29238
ARHGAP11A-SCG5	9.19235e-05	8.50685e-05	0.353772	0.00022429	8.49796e-05	0.00114971	0.124106	0.000105163	0.0641432	0.00077644	0.000101159	0.00111319	8.48933e-05	0.000103314	0.0422574	0.0406574	0.00761458	0.000408519	0.000108897	0.0592875	0.00103857	0.107607	0.00371335	0.000126524	0.0160027	0.00170524	9.97213e-05	0.00860965	0.0575075	0.0260172	0.231431	0.0819894	0.518756	0.000128688	0.634244	0.00620021	0.0729513	0.000236763	0.118756	0.000114598	0.000207506	0.045158	0.000117389
ARHGAP11B	0.509255	0.275122	0.205284	0.322163	0.46409	0.603415	0.333189	0.545957	0.404105	0.469171	0.17399	0.587107	0.369959	0.240032	0.388409	0.229603	0.321449	0.392315	0.341514	0.353334	0.351172	0.409228	0.326857	0.14885	0.447064	0.35889	0.593775	0.422451	0.383819	0.265166	0.684971	0.55906	0.46045	0.24407	0.154206	0.508481	0.225908	0.839053	0.112109	0.960283	0.000105181	0.567955	0.200615
ARHGAP12	3.79406	10.0138	14.875	12.5121	11.3783	11.8834	10.9971	8.51405	9.27408	4.29469	8.11049	14.1065	8.7557	0.953854	10.4701	11.4168	18.9495	16.0661	10.0447	6.55589	12.6215	13.4303	9.39685	2.67436	9.5132	12.1175	11.5948	16.1242	13.2283	14.5995	19.8149	10.7107	16.7269	11.9977	20.7348	14.5895	18.3712	16.2287	12.0658	3.24985	5.03279	13.6252	12.6749
ARHGAP15	5.56629	2.26068	5.22176	4.78424	4.50678	3.38804	6.11198	4.77297	4.26367	5.18756	3.40788	7.44138	3.98129	6.06632	2.47387	5.97741	4.17899	5.88337	3.8848	4.35004	4.2846	3.91414	5.16973	7.59295	6.12622	5.28313	4.95473	6.6553	4.28597	10.5002	3.3652	6.17873	4.87018	4.76526	2.38286	5.14314	5.07436	3.62565	5.07851	3.25499	6.6378	5.49086	3.17793
ARHGAP17	37.9792	27.4401	36.4091	33.3853	34.1425	28.5129	30.569	44.0352	32.7452	33.8827	38.4522	33.6036	36.191	53.4552	35.0326	33.4513	30.5305	31.4667	42.121	38.8919	40.644	30.9937	34.8175	42.2866	41.6113	40.8505	27.9715	30.7947	32.0436	33.8838	31.6755	29.4778	25.2667	28.5461	24.5036	30.0971	24.7087	23.9507	22.7069	32.1941	40.994	26.0607	34.2105
ARHGAP18	23.0734	14.4574	22.4426	24.4982	20.323	28.1167	23.0051	22.6865	25.5419	19.204	17.0104	22.1205	20.1044	21.2231	16.7107	24.1285	16.7157	21.7269	22.2101	22.5379	31.2109	23.6497	22.1125	16.6595	30.3221	21.8366	31.3853	24.1	31.6474	25.46	27.8992	23.1617	37.0775	21.7628	96.7746	42.2834	27.824	27.6413	26.9978	11.4387	15.6835	30.9165	17.6206
ARHGAP19	9.99128	15.117	13.952	16.6907	19.9945	11.3731	7.80103	9.857	10.4239	10.6193	8.16014	8.2119	13.0307	5.79871	13.3275	12.261	6.50537	10.4614	11.028	8.36126	9.55316	11.1423	9.38721	4.80488	9.3334	8.28107	8.14028	12.0148	6.98558	11.0276	7.44818	12.7726	10.6289	10.2678	9.91026	8.3819	8.0229	10.5679	10.2957	3.72174	7.93116	8.54154	8.71892
ARHGAP19-SLIT1	9.18271e-05	8.38274e-05	0.0875622	0.0337483	0.132532	9.58231e-05	9.85261e-05	9.47635e-05	8.90469e-05	0.04262	0.000101141	7.66278e-05	8.48689e-05	0.000103314	8.72566e-05	0.0342077	9.66493e-05	0.105865	0.0175334	9.61919e-05	9.22969e-05	0.0341577	9.55554e-05	0.000121546	9.35412e-05	0.000107019	9.8385e-05	9.76713e-05	9.71209e-05	0.00010431	9.71798e-05	9.70507e-05	0.000107491	0.000103092	8.86582e-05	9.72288e-05	9.21524e-05	9.95428e-05	0.122977	9.46079e-05	0.000105181	0.000110453	0.00010788
ARHGAP20	4.35409	5.49034	6.35257	3.31453	6.34851	5.22872	2.77868	3.5455	5.41118	4.48664	5.71576	5.80245	5.23702	3.52002	6.16224	5.16099	7.60709	3.59568	3.41336	6.03181	6.05229	4.28848	4.25409	2.55745	2.93677	2.00842	2.40238	5.30546	2.98726	8.30267	4.18337	5.24972	1.6967	4.33222	5.32554	1.09781	1.01129	3.1398	2.04176	4.44608	7.27509	1.6577	2.86923
ARHGAP21	83.0875	118.691	76.8687	101.906	145.135	97.8569	96.3496	119.584	107.345	102.219	94.7262	137.335	122.252	65.7913	133.448	90.6963	119.557	130.223	109.714	97.8803	107.556	74.0603	90.8335	100.046	118.951	141.139	80.8376	96.4342	113.863	114.196	111.808	97.5223	93.4046	122.846	67.5869	85.7492	92.7641	90.4353	91.7636	94.3506	87.4234	115.801	165.182
ARHGAP22	0.899095	0.136514	0.00690374	0.143032	0.161442	0.932354	0.378797	0.0338153	0.376523	0.862945	0.176578	0.716678	0.386631	0.532566	0.509466	0.487639	0.649086	0.764596	0.292983	0.512126	0.772581	0.430339	0.881107	1.06675	0.474014	0.319401	0.768019	0.413207	0.120228	0.621312	0.739565	0.319534	0.408082	1.48417	0.31662	0.0682867	0.843842	0.446293	0.27395	0.211142	0.916894	0.329766	0.421509
ARHGAP23	73.0293	48.489	126.239	100.616	66.9166	79.9488	94.2344	90.116	107.265	86.4351	89.1322	43.1509	73.6447	105.974	57.4019	129.419	93.5078	91.9993	100.677	94.2385	89.4328	138.149	122.147	119.483	111.273	139.002	130.178	91.9966	152.603	100.617	130.817	76.288	97.3297	110.201	72.8168	106.207	103.071	95.8305	120.594	78.4523	134.911	95.5935	119.377
ARHGAP24	7.23385	5.82805	25.5174	5.19221	3.26742	14.4691	26.2949	13.2217	10.2553	7.02231	17.9895	5.34126	5.172	4.70443	2.7349	10.1196	22.5249	33.3843	22.7197	13.0297	40.3458	26.197	20.0996	17.7388	18.7218	28.1156	19.0962	26.4531	16.8467	24.3592	18.649	23.7394	44.5809	24.5222	0.290886	31.6924	26.8436	23.1484	26.3755	16.6026	11.8637	30.4886	20.2226
ARHGAP25	10.6677	8.61752	13.4082	16.0575	14.0754	14.6235	10.2332	7.72223	11.5691	13.4691	10.0224	11.6575	12.4475	4.55789	9.73805	13.537	10.6383	9.62326	14.6137	12.5234	11.5067	11.8333	11.8924	7.74789	11.3608	13.4745	9.29417	11.6545	11.1433	9.66027	9.30049	8.95023	9.16408	12.8721	5.32387	10.1107	11.345	11.7791	8.53247	14.1364	14.3896	9.34981	10.3081
ARHGAP26	4.6339	7.52204	11.9182	18.1903	9.03812	17.1412	13.2132	12.0561	10.8618	6.96007	11.2302	17.1345	9.0138	5.14323	21.3383	9.86542	11.8476	9.60833	17.5734	12.7865	9.15019	17.2118	25.8518	4.31284	16.2372	9.61956	23.7588	14.9442	22.988	16.9411	13.2339	14.8347	11.0846	7.96261	122.431	23.9737	11.4453	11.9032	11.6077	6.67737	11.5128	10.2826	5.28994
ARHGAP26-AS1	9.18271e-05	8.38274e-05	9.35396e-05	0.0495811	8.4978e-05	9.58231e-05	0.0127525	9.47635e-05	8.90469e-05	0.0172673	0.000101141	0.0291442	0.0153385	0.0352698	0.0169157	0.0200139	9.66493e-05	0.0172998	0.0204289	0.0232753	0.0170271	0.000106291	9.55554e-05	0.000121546	9.35412e-05	0.000107019	0.0177305	0.0337098	0.0142888	0.0189217	0.00853101	9.70507e-05	0.0121027	0.000103092	0.235926	9.72288e-05	9.21523e-05	0.0291039	0.0187735	0.018694	0.000105181	0.000110453	0.00010788
ARHGAP27	2.0825	1.15292	6.87886	4.59609	2.5211	4.37661	2.34579	0.97422	3.78475	1.52112	1.85622	1.2815	2.4098	0.930443	3.90154	3.35008	1.26657	2.87649	4.17805	1.26587	3.77465	2.38273	3.28141	1.27554	3.54909	4.32755	2.11243	3.73564	4.0803	1.91709	4.23072	3.68724	3.46456	1.73691	4.77886	6.97472	2.23364	3.63386	1.71449	1.21227	2.80004	1.81528	3.29761
ARHGAP27P1	10.7076	7.51242	15.5443	11.2063	9.48566	12.2532	14.2301	13.68	12.7214	15.7161	7.86596	9.36813	11.4496	17.2385	10.9777	16.4463	9.8458	9.42223	12.3376	10.8286	12.6029	10.1022	12.5978	12.0125	13.5748	11.2687	14.4915	7.66019	8.25303	6.72929	11.1662	12.8867	10.2577	11.3487	8.96873	14.6044	10.4116	10.9109	10.19	14.7958	15.3517	12.7788	10.7466
ARHGAP27P1-BPTFP1-KPNA2P3	20.1511	20.6494	35.1796	25.5451	26.9463	28.5833	28.6119	25.72	25.299	23.2437	19.9569	20.7193	25.3952	18.4779	25.4945	30.6976	28.7487	25.444	27.2955	21.7082	33.2415	22.5533	28.7524	16.2572	33.5987	21.833	28.4588	25.5435	18.7156	17.9153	25.2562	25.9578	24.0373	24.1557	27.6257	33.3694	26.7315	31.2142	24.1287	29.1864	23.0772	22.9763	21.6059
ARHGAP27P2	0.668658	0.350564	1.76815	0.264043	0.830587	0.199386	1.55654	0.670328	0.609173	1.20248	0.572837	0.290753	0.366172	3.11234	0.84151	1.83313	0.557283	0.430161	1.2916	0.695469	1.01618	0.620288	0.698184	1.05735	2.66966	0.0979407	0.564327	0.453862	0.695487	0.451721	0.514561	0.386952	0.659847	0.146162	0.333513	0.498385	0.803519	0.464169	0.784269	0.334884	0.335131	0.618438	0.591841
ARHGAP28	5.30293	9.36263	3.49736	4.52223	9.68259	1.34652	4.27608	3.30549	2.34428	1.352	3.05822	9.00713	6.91308	2.37653	4.71201	3.76054	2.58413	3.59676	3.36861	4.97031	3.62166	1.22804	2.76988	2.93434	3.16731	1.89458	0.739124	5.12919	1.65292	12.4861	4.65863	3.16773	2.4778	1.88444	0.961746	0.460157	3.62648	7.24982	2.99767	6.03103	1.62555	4.77328	2.47445
ARHGAP29	5.27047	6.10294	25.9715	17.1696	17.3184	15.1946	11.9285	6.73604	16.6613	7.49736	7.87958	6.38366	9.50492	4.31274	11.796	14.3229	15.3429	11.613	14.1717	8.16159	16.2639	12.1953	16.3683	3.01767	12.1592	8.10269	8.52326	22.1067	11.3739	24.6506	19.9273	16.9875	16.6206	10.544	32.7698	13.1482	14.482	21.6844	10.2886	5.24404	8.07635	14.7016	11.499
ARHGAP30	5.33287	4.12847	3.9281	11.5378	3.57374	6.33175	5.37743	3.66231	10.6279	8.68046	6.46991	20.2249	6.67868	2.13155	5.81249	12.9416	0.782036	7.65971	5.61542	5.87924	5.8536	7.52271	11.8111	4.40697	11.739	8.21793	9.29574	5.88025	11.1845	7.16582	22.0007	9.38233	7.54094	9.5525	16.1205	4.08442	7.68789	5.04415	6.6127	0.211949	8.86037	13.3846	2.80582
ARHGAP31	50.7489	42.5834	137.932	82.6669	60.5168	60.1859	72.0646	58.1885	58.8031	61.7516	50.8304	33.3988	65.2247	59.4315	50.923	89.2912	63.5392	56.1148	69.2537	49.557	87.1296	77.2472	69.6958	37.4036	84.1302	72.0253	80.9669	84.1817	64.6856	77.9604	52.1549	63.0409	80.7162	53.3115	18.7532	68.8528	69.5599	59.024	82.4123	44.4154	51.971	58.395	60.3788
ARHGAP31-AS1	0.0156399	0.297992	0.212261	0.379522	0.28099	0.149564	0.139293	0.142265	0.211944	0.154684	0.157604	0.174482	0.274651	0.0704363	0.269343	0.079787	0.25879	0.189325	0.122123	0.208708	0.338788	0.193052	0.151034	0.256419	0.200697	0.234908	0.194052	0.184965	0.184588	0.0941911	0.312149	0.221157	0.192032	0.255705	0.0326179	0.0712812	0.444091	0.348152	0.093456	0.0744922	0.209496	0.39584	0.37268
ARHGAP32	36.4599	27.4853	22.5416	17.319	28.539	19.9697	21.0259	31.9897	21.006	28.3589	27.816	38.2092	31.8694	22.4669	40.0992	27.5435	24.1073	20.2074	20.4867	29.0433	33.5887	21.4218	28.6499	18.6551	32.5015	27.7662	27.6199	21.1077	31.1797	19.7019	20.1708	29.2312	15.2631	29.9407	55.2503	24.8387	36.714	30.0904	19.8038	29.8148	22.3828	19.5633	27.1339
ARHGAP33	21.2898	19.8782	22.7894	42.9662	34.2407	20.2112	22.6638	36.8167	29.6327	38.9746	14.8596	22.6036	34.4217	14.4871	46.7561	24.4802	15.5158	19.4298	15.8186	25.2136	24.9959	20.4138	26.6939	19.9352	23.0302	24.1035	25.917	16.9411	19.0357	16.7716	18.3794	17.9451	14.2586	23.8327	18.6625	15.9117	27.2377	20.5289	18.518	23.6302	26.5486	40.3782	28.0742
ARHGAP35	67.8207	83.3968	117.258	123.943	97.6085	94.4971	83.8581	86.2774	89.9194	73.5866	82.1161	71.2157	83.8189	57.9369	94.5592	91.4132	98.3434	104.798	90.1417	83.437	113.937	128.212	109.581	77.0337	80.2261	107.402	110.765	110.635	80.4241	112.415	93.8686	100.439	100.52	97.4759	110.291	90.902	107.828	83.6487	94.1561	77.8385	98.6861	109.642	132.417
ARHGAP36	0.000118571	8.38274e-05	0.000100298	8.98604e-05	9.19806e-05	0.000114867	0.000120292	0.000106409	8.90469e-05	0.000109887	0.00010935	9.3294e-05	9.36147e-05	0.000123477	8.72566e-05	0.000118042	0.000108059	0.000107161	0.000119216	0.000118342	9.22969e-05	0.000122095	9.55554e-05	0.000121546	0.000102389	0.000140675	9.8385e-05	9.76526e-05	9.712e-05	0.000115099	0.000102015	0.000100219	0.000107459	0.242519	0.0965403	9.72288e-05	9.21523e-05	0.000116173	0.000113579	9.46079e-05	0.000129193	0.000110453	0.000120446
ARHGAP39	6.39535	4.42919	6.16508	3.88087	1.85581	7.5933	5.57257	5.13268	9.65112	5.4412	7.53039	6.21914	2.94403	7.15685	8.52446	6.40488	5.74888	5.45409	7.26639	8.03172	9.84743	10.5165	5.3749	6.77499	7.33791	5.93875	13.6707	4.82144	5.81718	5.59341	8.80263	5.04814	4.22669	7.52451	66.6406	7.23461	8.65588	10.6501	4.8801	14.6661	9.94045	7.42291	7.75533
ARHGAP4	30.9435	16.303	18.3426	24.6589	16.9123	24.7861	20.2173	23.3581	31.8267	30.7219	22.5298	45.2375	30.2247	37.0059	21.4851	33.6384	14.3519	21.3563	26.7458	27.2314	22.0468	21.287	24.7642	33.0557	24.0859	24.433	27.316	15.3668	16.7357	17.567	27.5634	21.586	13.102	20.9046	26.8085	19.6162	23.7924	16.5119	16.1481	21.6772	43.9822	28.4843	15.5272
ARHGAP40	9.18271e-05	8.38274e-05	9.35396e-05	8.98604e-05	8.4978e-05	0.0831336	9.85261e-05	9.47635e-05	0.106017	9.019e-05	0.000101141	0.0582118	8.48689e-05	0.0352698	0.151543	0.0299761	9.66493e-05	0.0517049	0.0611065	0.00782255	9.22969e-05	0.000106291	0.0189628	0.000121546	0.0155246	0.000107019	0.0529948	0.151352	2.08627	0.0189217	0.168774	9.70507e-05	0.000107459	0.000103092	0.179	0.0178932	9.21523e-05	0.0291039	0.000102874	0.167489	0.000105181	0.000110453	0.00010788
ARHGAP42	21.6817	23.2616	25.0479	19.3156	12.5571	21.3487	18.0727	18.2107	16.342	19.0702	9.05947	16.1696	13.4506	14.3029	11.07	25.9778	22.4832	16.1528	17.9867	16.2035	48.75	23.1731	18.9801	15.1517	18.2972	14.2398	21.8121	23.5988	17.3219	21.2606	22.0229	16.4185	22.3663	15.2848	9.22685	24.5987	41.9472	41.1883	34.8215	33.375	14.1924	19.3496	20.5605
ARHGAP42-AS1	0.639136	0.77114	0.509579	0.430304	0.575916	0.348854	0.367064	0.487537	0.319776	0.293993	0.200559	0.552361	0.289904	0.668266	0.490513	0.339762	0.159293	0.173455	0.153596	0.262792	0.830966	0.276347	0.284116	0.288457	0.24699	0.254475	0.671981	0.268995	0.142013	0.24473	0.168774	0.13861	0.156365	0.0551297	0.2774	0.521648	0.748476	0.523587	0.206755	0.297685	0.230435	0.150022	0.418147
ARHGAP44	8.93533	11.2403	12.2858	9.52358	21.1612	9.22566	9.07692	14.7582	8.56722	13.7605	8.76112	5.27605	15.1698	5.93272	14.8465	10.5562	7.26065	5.89197	5.93196	5.44528	11.5389	4.21194	11.8363	2.47814	7.88944	6.80092	10.037	7.94	5.92219	5.7541	4.48465	7.94694	6.45377	4.2276	19.0561	8.70732	9.13971	6.27687	10.2595	6.46504	5.86659	8.39767	6.73789
ARHGAP45	5.00493	1.66907	5.32414	7.88757	4.28392	7.11407	4.30562	1.89459	11.1014	7.80005	4.17645	16.1773	5.30622	4.8776	4.62057	7.83911	1.92068	7.33779	7.04207	4.73408	6.86419	8.67873	11.3591	3.22933	7.36182	8.00269	9.72651	5.7377	8.23849	5.07442	15.0443	8.30053	5.21312	5.84463	12.5006	7.97427	10.3024	5.22939	6.41878	0.652047	9.71904	13.2067	4.07419
ARHGAP5	30.7654	48.7049	49.1972	48.5523	47.0487	59.1352	39.7017	36.69	40.6628	34.1486	46.9881	36.4227	34.8147	20.6804	41.1815	38.9241	61.4242	56.4963	43.9461	35.8416	50.8195	49.0099	50.8739	35.2821	43.8585	54.1916	52.9918	83.2975	59.6857	63.2418	79.6355	49.5962	88.0155	49.9373	48.1301	55.7508	39.9844	72.3841	72.4451	40.0553	32.6123	44.8478	61.0406
ARHGAP5-AS1	2.22346	2.66373	2.34572	3.81091	4.17702	2.14247	2.98644	2.59979	2.76745	3.24655	2.21945	2.41269	3.64571	2.91892	2.74313	2.12204	1.97015	2.64929	2.81702	2.29482	2.08307	2.16385	1.73588	2.80338	1.69751	3.15035	1.71042	2.30253	2.42687	1.95711	3.20495	2.0449	2.89097	3.35945	2.96838	2.13562	2.07209	2.08841	2.25925	1.82284	2.57562	1.73143	2.54237
ARHGAP6	30.8708	17.4182	32.6763	23.8692	19.9171	47.2553	24.3809	32.1665	19.0216	26.3972	25.8563	9.81805	17.0107	20.8575	26.5041	29.9918	33.0891	28.2752	41.3706	40.468	51.3678	50.1344	37.6006	23.0214	32.6619	42.1921	55.7938	57.3298	26.2384	30.8267	29.0801	41.1412	35.1598	35.2475	3.42254	47.2046	39.2782	19.2759	30.0585	18.4444	40.4661	36.2825	33.1608
ARHGAP8	0.0164887	3.59291	0.0627969	0.243243	0.0038694	0.476403	0.138675	0.0354594	3.62653	0.216679	0.203075	12.7896	0.448375	0.862196	3.10337	0.245446	0.210079	0.606121	0.867927	0.428618	0.140825	0.205349	0.248626	0.481917	0.485948	0.00984113	0.601706	0.199442	8.05131	0.192521	1.69998	0.239024	0.0581638	0.198131	19.8433	0.471759	0.276918	7.58188	0.63806	2.95409	0.269512	0.345019	0.21218
ARHGAP9	1.08623	0.953584	0.790633	2.14623	2.0903	3.22329	0.950755	1.59694	4.66501	5.06464	1.4593	7.07687	1.96635	3.09025	1.73812	3.55055	1.34889	1.70881	2.34161	1.84187	1.89559	0.927006	0.780516	1.63954	3.74442	1.4418	4.8891	1.59051	2.47269	2.71682	5.17493	1.97787	1.74765	2.65191	3.67709	1.93389	1.33659	2.20897	1.92569	3.41581	3.68476	2.87278	2.11351
ARHGDIA	137.503	98.3018	136.696	139.373	74.3811	142.59	151.826	167.091	188.405	173.726	177.449	118.308	118.97	246.206	125.809	181.741	140.586	135.088	157.41	173.823	130.953	177.533	150.435	341.973	149.912	177.748	187.316	110.487	204.191	130.757	195.71	129.374	128.583	171.261	168.099	162.018	158.081	138.054	122.417	196.343	247.854	195.209	190.306
ARHGDIB	84.0864	44.7328	78.5544	82.2149	61.2272	79.1403	72.3652	108.827	85.1739	99.636	60.5067	110.316	69.3299	115.252	65.0805	98.5966	53.5363	71.031	77.6691	76.3324	78.0344	63.4093	75.2196	94.4349	103.021	86.409	66.2438	76.4526	67.2317	91.9279	92.1824	73.1576	71.0016	70.1414	67.4428	90.8436	70.3474	54.2301	66.3573	41.5809	78.5563	89.3587	60.3004
ARHGDIG	0.0778321	0.122752	0.271196	0.033084	0.0122982	0.282424	0.189908	0.121955	0.264908	0.0344443	0.0716932	0.0727456	0.122114	0.0704363	0.0674011	0.308918	0.139393	0.103313	0.142462	0.0928125	0.20331	0.17927	0.169901	0.240401	0.123542	0.137074	0.194052	0.084128	0.19878	0.131826	0.0422663	0.0664151	0.12006	0.219191	0.162735	0.356017	0.021235	0.0871126	0.0561147	0.241887	0.272314	0.197975	0.131604
ARHGEF1	42.1268	25.4813	59.9517	59.1199	23.6631	56.8919	59.2782	48.3249	63.0322	49.337	46.2187	49.832	37.2177	33.6633	49.2855	63.9979	44.6443	44.4157	51.2148	44.1833	48.9724	44.4104	58.2682	39.7108	58.5917	51.8097	83.158	44.4746	38.8444	35.6115	64.533	55.9816	50.4392	55.5624	46.4618	62.8015	62.5739	54.9727	51.7913	44.8642	48.0498	61.3847	48.9858
ARHGEF10	19.2709	22.2503	49.8523	37.7412	20.1362	46.5081	44.0593	44.5619	34.3133	38.4116	27.5584	19.6872	19.6402	24.0165	32.1972	48.7531	53.1113	41.2782	41.8699	36.9149	25.5936	47.1212	53.6115	24.1299	36.9837	49.3012	52.084	55.6271	40.2288	49.6655	37.9907	36.368	60.2349	57.8817	22.7045	43.1665	47.1125	37.5961	51.2989	33.597	56.1916	57.4544	55.3784
ARHGEF10L	13.1913	6.82634	14.254	8.55825	11.6307	6.54124	17.393	18.9372	21.0726	17.4563	13.97	10.8739	17.6441	17.7068	5.89663	18.4897	12.9966	12.2495	13.1843	15.1261	8.26704	6.56718	20.7269	24.9244	9.35326	18.4629	6.85397	8.51967	9.50263	24.5403	6.06302	9.65651	7.89441	13.529	2.12796	9.5121	10.4208	9.89099	4.86663	12.2291	27.0419	14.6435	10.173
ARHGEF11	15.6917	32.3944	40.2482	32.9995	34.1941	31.0859	27.9604	23.0842	34.2653	18.5095	26.9407	18.9607	23.5138	6.05351	36.5191	26.3726	44.3078	32.2447	26.9628	21.9875	38.6256	36.6135	35.5775	9.17881	33.2441	35.2174	40.6529	46.6091	32.096	31.5287	34.2338	27.6168	39.039	35.6039	26.2191	33.9795	34.9413	39.5307	35.4052	17.2691	22.374	34.2492	33.1452
ARHGEF12	93.5279	114.527	114.288	119.317	128.995	99.2836	106.51	124.387	87.6045	99.1112	107.78	96.1429	112.476	77.3305	98.3874	113.043	127.377	118.75	113.653	102.599	127.964	135.25	136.47	91.8633	127.013	107.869	114.116	129.801	102.767	154.248	90.6323	111.32	141.848	101.881	76.9605	103.482	100.809	131.64	162.675	127.5	91.0433	105.274	127.155
ARHGEF15	32.4196	21.9049	46.8054	40.0584	33.2313	26.4632	18.1757	22.6764	29.5725	30.2648	23.8466	16.4548	34.3228	28.1985	23.007	41.4888	29.9813	26.4281	33.8345	25.0683	29.1211	27.9565	38.0308	26.5455	35.9318	31.5054	26.5231	20.0788	27.4806	21.8122	26.5394	23.3938	18.2018	23.0483	6.62737	21.7144	16.5784	24.6345	16.7102	31.991	21.3575	17.5336	21.0512
ARHGEF16	0.248861	1.89268	0.117964	0.593984	0.256564	0.0831336	0.215216	0.609398	1.86706	0.773058	0.429653	5.18865	0.411933	0.597934	1.09394	0.587859	0.119494	0.172123	0.457713	0.131444	0.0678315	0.110361	0.45291	0.464662	0.216128	0.0783739	0.299845	0.168158	3.83184	0.225913	1.223	0.165892	0.108065	0.182676	8.60407	0.0534852	0.126949	2.84253	0.242821	0.576676	0.628279	0.346374	0.0439399
ARHGEF17	139.439	136.105	202.733	179.398	128.4	219.91	172.44	198.585	224.641	154.679	158.434	142.536	140.668	164.763	144.456	199.732	260.289	159.391	178.809	177.473	159.869	189.03	214.386	185.603	162.081	201.567	225.497	165.75	193.074	201.703	235.954	154.022	137.54	190.675	116.395	181.955	201.646	193.925	143.011	188.556	255.727	208.532	239.044
ARHGEF18	16.1667	13.6035	20.6766	18.1025	10.1568	14.5596	14.9765	15.4489	18.9881	16.9919	18.8955	18.3157	14.2902	12.4875	17.2751	16.7699	14.7606	18.5436	16.6887	15.9018	19.0823	15.7182	15.3056	33.0687	14.6687	22.2399	18.6196	14.2109	16.2191	14.3707	20.3985	18.9166	11.3759	21.1972	23.8524	18.6983	12.1416	9.22082	7.51744	37.3493	19.8672	16.2731	22.6103
ARHGEF19	14.7085	11.7412	15.3468	10.0303	6.16779	5.61345	9.21221	12.4096	13.7045	8.77757	5.77042	11.2492	7.62691	9.8643	10.2823	7.81045	6.50723	7.55202	7.80003	5.33901	10.4489	5.56796	5.60367	9.24287	5.97191	12.5815	10.4031	8.0334	9.01179	3.66949	13.781	4.74737	5.97375	7.77772	15.9801	16.0165	21.0795	8.0053	4.64909	13.4847	10.2812	8.53303	12.1854
ARHGEF2	27.8335	26.2898	29.2623	31.1029	25.6149	33.3195	22.9765	25.6954	35.0368	22.6287	32.6127	24.6782	26.6431	23.4081	28.7782	30.0905	36.4823	20.9429	29.0911	30.6891	35.1677	37.9344	33.7926	22.967	31.1828	24.2856	31.7376	21.4542	28.9456	36.3224	35.6199	40.1106	21.0796	37.9539	38.6958	26.1906	18.5563	28.9153	21.1056	32.3675	29.4338	30.3443	28.7161
ARHGEF25	129.524	93.8926	64.1893	108.218	92.0449	99.0134	150.411	137.565	88.5887	162.532	168.386	53.2341	111.159	172.177	74.094	97.6266	102.423	154.241	112.545	139.517	70.1992	127.408	131.211	211.128	118.677	168.67	94.8121	132.81	90.459	127.113	88.0598	152.172	136.972	142.422	8.40643	53.7372	66.1639	79.0061	144.009	80.3391	155.344	144.382	164.827
ARHGEF26	7.97435	12.6627	16.8041	13.0705	16.1101	12.6351	13.8198	16.5245	10.1226	11.8199	14.2844	4.78006	8.98379	6.86504	11.637	8.40282	11.8675	10.628	6.5372	15.9022	20.2864	15.8583	12.1439	10.7148	22.9698	15.5598	27.834	12.7017	19.5205	19.7659	10.6221	15.4263	17.6759	14.3216	10.8497	33.1785	15.8714	8.17709	14.6382	6.31058	12.6055	23.254	12.2802
ARHGEF26-AS1	0.746398	0.648472	0.318344	0.478505	0.818374	0.116349	0.461109	0.792188	0.187932	0.326454	0.415335	0.524182	0.991572	0.404518	0.639569	0.288993	0.179192	0.189325	0.114338	0.503714	0.474267	0.151706	0.490644	0.224382	0.558404	0.293608	0.229316	0.386637	0.553571	0.677529	0.0844355	0.43383	0.228017	0.602594	6.54398	0.498385	0.380663	0.261139	0.298833	0.111691	0.628279	0.445306	0.197352
ARHGEF28	12.9027	17.1356	20.2048	11.6794	14.2485	12.8985	32.2657	27.1507	16.9511	19.2016	8.47944	22.2804	19.8664	24.0479	22.1527	25.6863	27.838	20.1054	28.2308	15.0952	22.4697	10.8174	8.68088	23.037	26.5942	22.2349	14.7372	15.805	11.3277	17.9829	13.1889	13.6093	23.4981	23.1903	49.0692	18.7415	21.6177	27.6521	30.852	13.7591	25.2087	19.7038	18.0561
ARHGEF3	49.4482	39.1553	70.3284	43.8926	26.2796	144.027	33.0829	38.0465	36.774	24.7869	71.0028	26.3605	25.6841	20.9003	37.5199	35.094	86.3172	43.6024	81.8769	70.4556	44.1189	115.266	56.4962	21.6705	57.8573	75.5086	78.524	58.0371	43.0456	32.7574	32.0529	96.0293	52.361	78.5686	43.9336	55.5252	74.2127	34.9578	28.3892	26.2256	48.0411	31.3489	75.4396
ARHGEF33	1.49831	2.56837	1.2836	1.31392	2.14398	1.92551	1.04137	1.70406	1.20737	0.941734	1.70639	1.88689	1.62067	0.9566	2.55265	1.03885	0.783696	0.793841	1.35487	1.36328	1.56708	1.18911	1.01088	0.795056	1.61339	1.39929	1.27324	1.38764	1.305	1.51619	1.13656	1.41582	0.953516	1.1692	1.43326	1.41575	1.1299	1.9068	0.46644	2.22367	1.41007	1.50642	1.1634
ARHGEF34P	3.04167	2.9574	6.92635	3.51504	2.97468	6.68913	2.7215	6.12872	2.85403	3.55153	2.14586	3.86282	2.12259	0.609595	6.89198	3.1646	2.72574	3.33053	4.94263	1.76406	3.48717	3.21294	4.03587	2.16183	2.27004	4.10523	5.04724	4.72538	4.02975	5.7559	11.2296	2.48534	2.9428	3.39198	16.0522	6.42758	5.8518	6.27694	3.18547	2.06826	1.84593	6.15308	1.90973
ARHGEF35	0.152279	1.96231	3.02202	1.64835	0.994831	1.31611	1.43528	2.95706	2.3541	1.15744	1.16072	3.16005	0.920201	0.229523	1.5547	1.4699	0.917184	1.44433	0.922093	1.01733	0.569909	1.84687	2.77726	1.35471	1.04605	0.88248	2.25447	1.86319	3.40431	2.418	2.71341	2.46409	1.99506	1.65554	26.1198	2.38175	1.018	4.31832	1.57305	1.51263	0.0182417	2.15241	1.48713
ARHGEF35-AS1	0.938712	0.454269	0.545394	1.32605	0.0717162	1.41311	1.34228	1.86288	1.39884	1.52966	0.67339	1.11853	1.28539	0.930341	0.87758	0.328453	0.529728	0.069608	1.32827	0.35233	1.42452	1.05116	0.0674521	0.875597	0.981212	0.5862	1.05638	0.216052	0.126562	0.890802	0.0853498	1.09603	0.97549	1.04508	0.0304336	1.94128	0.727598	0.997443	0.689433	0.00101102	0.715452	1.77878	0.9411
ARHGEF37	47.2662	52.7999	77.2171	39.2961	41.5863	42.7645	67.5218	35.299	43.7217	48.0959	20.6329	35.012	50.2609	37.5931	39.2777	45.0591	37.9882	75.6741	34.2913	38.6473	91.0585	38.5616	57.2811	34.312	30.9393	51.6563	28.3702	52.5527	27.021	35.5837	25.4365	44.8145	56.3419	33.0824	44.5082	46.7324	48.3114	19.8681	64.6191	30.1497	27.9748	64.974	38.9011
ARHGEF38	0.108928	1.15667	0.0472464	0.112061	0.122218	0.0831336	0.0254093	0.0204049	0.225185	0.0172673	0.214877	3.54632	0.137368	0.175936	0.521769	0.0698311	0.0398956	0.361351	0.152631	0.100539	0.0508967	0.151706	0.0566974	0.0161402	0.0155246	0.0196738	0.105891	0.369831	3.31163	0.037739	1.35152	0.0719416	0.12006	0.0183604	5.45878	0.048412	0.0423778	6.77362	0.112127	0.520878	0.0210533	0.0248436	0.0439464
ARHGEF39	10.5377	7.35751	9.05633	12.2474	8.03457	12.8674	16.4831	13.6359	11.3009	14.4393	14.1927	8.4098	8.6763	22.4432	7.94422	10.4015	15.4259	13.1358	11.6375	21.9854	5.5914	11.9048	12.8492	29.24	10.1978	19.1527	11.7501	8.83225	11.1556	15.3184	8.72555	11.6285	15.4473	17.4573	2.51418	10.3718	6.68662	10.815	13.7068	12.2472	17.3198	19.5549	13.1951
ARHGEF4	3.89493	2.70399	4.88408	7.12337	4.6192	5.2951	5.28341	5.61367	2.44388	6.02841	7.7731	0.50602	5.88244	5.99841	5.36769	5.31599	6.01577	7.95023	6.00783	7.30039	4.18998	6.18479	4.58305	11.1515	5.48488	6.993	5.55545	5.84956	3.3464	6.68851	4.97346	7.50315	6.98806	9.16401	6.61264	5.56241	4.13519	0.775705	4.69358	2.82385	9.76134	9.42056	8.84645
ARHGEF40	49.834	53.9646	60.5649	101.212	79.6542	60.472	53.2855	74.3167	84.7227	63.7291	91.7479	54.7406	69.6454	48.0954	69.763	62.5523	79.3166	79.8355	66.8191	79.6623	62.6405	71.0316	70.082	80.7911	57.608	78.3809	91.5358	78.6477	68.9607	56.2382	63.2248	66.295	49.612	87.9699	28.0601	42.6731	71.9904	56.8634	59.345	83.1464	89.7964	83.6212	83.8757
ARHGEF5	6.87357	11.683	17.0367	12.1672	8.45267	11.1744	12.5211	12.8799	11.3858	10.539	8.81175	20.9648	11.8548	7.7163	17.022	12.0682	9.79885	12.1461	9.67369	6.55177	10.4259	8.78925	11.6024	10.4766	9.90558	11.8344	8.88927	9.66066	13.5389	8.47627	18.0875	8.51158	11.951	6.98048	53.2728	17.3713	9.7796	25.8878	11.6756	5.94403	6.65038	16.7047	9.1546
ARHGEF6	72.6874	55.7233	70.3411	59.8701	81.99	68.5273	66.6091	49.6931	48.2544	51.3768	38.0262	48.3893	61.769	44.0856	63.0354	50.6346	101.259	76.7593	61.1761	57.1818	82.3427	58.2463	80.2463	62.425	64.9375	77.6223	60.0919	72.4677	54.7791	60.8649	71.7402	61.1891	87.4641	68.4676	15.7202	74.6641	71.6061	76.8699	93.454	38.2056	59.7354	55.468	72.0646
ARHGEF7	18.2053	20.7516	18.3361	16.0328	24.1861	18.9156	22.6134	24.4416	15.7559	11.6943	11.5609	15.5662	15.8838	8.79015	15.0283	16.3505	22.9609	21.5483	13.8953	16.6139	23.5018	16.154	27.8018	11.5109	23.1701	17.4798	14.9228	26.7632	17.41	23.7265	16.7124	18.6951	23.4633	17.5307	10.9367	28.2428	16.3057	21.1462	17.2765	18.2172	14.4979	15.8707	19.2975
ARHGEF7-AS2	0.63915	0.28837	0.47882	0.0918912	0.444246	0.275944	0.33837	0.233651	0.147722	0.275486	0.174031	0.37604	0.449205	0.601131	0.384599	0.256458	0.0858884	0.109912	0.212677	0.321938	0.199683	0.214201	0.190501	0.381188	0.2184	0.0979407	0.407504	0.192222	0.127822	0.301183	0.183749	0.199409	0.436204	0.0731323	0.0920508	0.299612	0.641697	0.196776	0.317835	0.343887	0.18802	0.549424	0.130187
ARHGEF9	3.64339	2.01751	9.05468	7.95745	4.98905	6.65191	6.15413	3.06435	5.45113	1.90023	3.59757	2.27324	3.24566	1.21261	6.15762	3.92941	7.37928	9.22288	6.00453	3.23321	4.11498	10.9423	6.2608	2.22765	5.01249	4.98074	6.38255	5.05252	5.46924	6.87528	4.72633	8.09089	12.1045	4.25487	7.8691	8.43697	5.47491	3.82185	4.83173	1.28472	2.84747	7.02598	5.92396
ARID1A	64.5686	82.1348	115.132	126.875	89.7557	106.632	100.845	80.7484	102.221	68.4507	107.929	94.618	87.8383	28.8207	123.894	104.129	129.615	112.831	106.69	87.1266	133.564	154.554	138.912	50.2104	92.8546	134.849	141.54	108.907	131.091	111.521	130.659	86.3402	102.521	104.103	145.488	120.073	115.495	120.246	105.372	74.7599	75.0058	131.976	143.036
ARID1B	78.6593	90.0836	89.7194	78.7663	88.1099	79.0814	75.419	80.0836	77.6323	74.9805	77.7714	66.7777	78.5259	60.5634	84.9683	77.8637	90.9823	86.2929	75.9803	74.8132	115.643	90.0746	87.6492	71.8118	83.3577	85.3408	98.9909	97.1205	70.7557	81.1469	73.0317	77.2141	85.7771	80.5323	74.1763	75.7959	98.1389	92.7919	95.7524	105.885	70.6084	96.8119	105.396
ARID2	31.3601	46.8744	46.165	36.056	44.8069	45.7297	35.0889	36.8709	34.4041	27.9399	38.6209	38.0107	33.3101	22.8142	46.2654	35.104	51.3456	44.3787	38.1065	31.9156	60.1241	42.6896	41.5222	23.7878	39.0078	35.4159	35.6667	53.8055	37.6218	45.4855	44.2545	39.1755	51.1483	36.0948	44.97	39.6224	46.3475	48.7725	49.8979	41.757	25.0433	39.5932	37.9587
ARID3A	8.17836	8.28894	4.1845	7.8527	7.49903	6.09507	5.11231	5.037	8.34189	7.42058	5.22632	13.9089	8.00825	7.22681	8.14506	7.43189	7.08432	8.7906	8.06443	6.07301	7.75623	6.89101	9.69787	6.92017	6.58915	10.1357	6.15372	5.86542	10.9702	5.58886	14.2111	8.25117	3.61068	8.92793	12.8735	6.69139	4.98979	7.80227	5.43325	10.267	10.3231	6.67805	13.7195
ARID3B	7.57125	6.60385	6.02076	5.77839	7.07396	6.4102	5.78594	7.50588	7.89286	6.96385	6.21878	7.38697	8.29505	5.03669	6.17968	9.16449	3.38246	4.8783	6.14548	6.21392	9.16908	5.01974	10.5341	5.28786	4.99783	7.61199	7.33667	4.24733	7.08034	5.43481	7.54082	5.12987	3.01064	5.67493	5.84008	8.95926	5.33107	8.50475	4.95292	6.72707	8.43113	5.82601	7.24872
ARID3C	0.0311879	0.0351318	0.00784794	0.0990723	0.010798	0.0110215	0.00842327	0.201578	0.0795203	0.00762375	0.0430564	0.0582118	0.0234998	0.0880174	0.0148486	0.0893586	0.013188	9.72975e-05	0.0157005	0.0170394	0.00751961	0.0212619	0.0599109	0.0141725	0.017013	0.0196738	9.8385e-05	0.0185248	0.0187697	0.0166102	0.0590908	0.0387543	0.024098	0.0161178	0.258261	9.72347e-05	0.00936502	0.0291039	0.00829149	0.0245667	0.000105181	0.0218055	0.0193319
ARID4A	29.8831	39.0018	53.1758	31.73	40.9167	39.4057	33.1276	32.8429	34.2988	29.9506	25.0454	36.865	38.9268	20.1117	39.6737	37.6703	41.8354	38.9825	37.2656	30.7055	48.1465	38.1575	34.265	21.4872	40.7848	37.3119	33.7806	56.7834	36.5896	42.3395	36.3068	40.2286	48.2652	36.4954	39.6983	43.4445	35.7359	31.9735	35.1678	22.5353	22.3774	34.3511	32.3495
ARID4B	17.2174	25.7168	37.7365	21.3923	19.1532	25.8969	17.1301	17.1331	28.0819	10.7647	18.7221	24.759	19.2962	8.29982	27.0417	20.2829	34.7123	25.9488	22.4134	13.3048	27.2846	28.356	28.0168	6.50825	26.7235	22.8483	27.5441	35.5448	31.7949	19.3949	37.9045	26.0916	39.8378	28.8294	34.6783	28.728	27.474	27.5587	27.6157	16.0056	11.5942	26.5232	24.1329
ARID5A	39.6055	18.782	28.4073	12.0021	15.0578	23.4665	50.1389	46.7614	88.9474	57.6492	110.697	17.3628	15.0414	58.9349	19.3202	102.368	8.7128	10.707	21.6385	18.2254	56.9009	79.6423	55.2039	135.817	65.4347	22.0618	92.8277	11.1772	60.7927	39.6461	30.7148	22.001	78.9772	32.8907	7.26826	54.6271	38.0395	125.981	73.354	29.8608	35.7708	35.8045	31.3139
ARID5B	189.975	158.335	372.701	90.0429	128.042	221.515	238.446	232.532	230.816	155.804	286.862	121.901	127.726	206.804	165.912	297.417	106.995	184.654	149.873	87.2925	413.846	277.771	160.807	188.977	317.901	140.924	325.077	188.201	203.969	260.855	276.713	104.57	340.189	126.654	67.4238	329.503	283.979	519.318	452.136	145.162	77.4498	213.595	155.095
ARIH1	99.0256	116.412	126.216	103.437	115.281	110.855	106.053	113.655	98.5525	87.9982	111.483	91.5194	106.623	82.5886	106.373	107.791	117.845	112.247	104.155	93.7363	148.959	134.593	124.996	98.6107	111.073	107.402	130.672	143.474	122.261	128.617	103.399	101.185	136.446	101.894	96.4981	117.56	125.673	157.755	142.532	140.574	86.709	112.808	120.451
ARIH2	9.06581	12.6012	20.8077	20.488	13.3732	18.4112	13.9633	11.09	13.5024	6.0083	13.1346	9.65075	10.3211	2.97449	12.3983	12.7809	15.4798	17.411	14.0902	9.8631	21.3761	20.0175	14.1877	7.37839	15.82	18.8657	20.1144	14.8547	15.4002	14.4853	17.4883	19.571	19.6442	19.2729	13.0437	23.1016	17.6649	16.4404	18.219	10.117	14.173	16.4929	17.5882
ARIH2OS	3.57935	3.27817	1.98511	1.88563	3.58572	2.0333	3.02041	1.88964	1.60467	2.5986	1.07494	2.13864	2.2912	1.84634	2.65237	1.38977	1.37534	1.87803	2.07753	1.93269	2.00852	1.39447	1.59063	1.13778	1.77738	2.03734	1.29112	1.71874	1.42419	1.09293	1.54	2.2363	2.26054	1.98019	2.59734	2.02019	2.38444	1.30752	1.20199	1.64023	1.74607	1.83658	1.87069
ARL1	69.6559	75.7492	72.8059	95.8744	83.8961	89.7928	82.2097	93.9726	82.3312	71.3087	103.188	76.0262	73.0934	63.6822	76.3731	75.976	119.273	98.912	92.0084	87.2299	80.4423	105.775	85.477	96.8684	93.7863	99.4526	83.9112	103.685	101.752	128.285	91.6942	93.9664	113.153	102.042	76.0067	81.8388	75.5917	86.8818	83.251	76.796	82.3324	97.5486	101.459
ARL10	18.8359	29.7924	35.6963	45.1824	46.6104	35.1431	28.8089	27.3174	33.7215	26.1942	23.4044	21.6959	33.5191	17.9746	33.5945	30.0604	45.7847	30.1573	31.1704	29.2875	38.0604	33.397	32.0622	23.1189	26.9117	25.671	32.0931	53.2248	28.1638	40.9485	41.409	31.7723	42.6825	34.4007	7.56132	29.8997	38.0211	29.7587	28.3094	29.7982	26.1552	46.9937	42.184
ARL11	1.15065	0.438184	0.49515	0.923926	0.549682	1.06298	0.683414	0.385987	1.11233	0.790235	0.386698	1.33719	0.579723	1.19576	0.538598	0.916611	0.597082	1.59993	0.772965	1.10497	0.982311	0.441124	1.11326	0.977257	0.941387	0.76321	0.511431	0.739565	0.482613	0.809251	1.56879	0.884338	0.683837	1.05903	1.00036	0.800917	0.697805	0.551183	0.485539	0.186089	1.61242	0.865769	0.876749
ARL13A	0.0156399	0.105132	0.0708159	0.0990723	0.000117074	0.0498732	0.000108963	0.000128256	0.0795347	0.0687984	0.0287379	0.0582118	0.000121315	0.0528051	0.0842295	0.000110025	0.0754261	0.0345024	0.0407677	0.0232753	9.23017e-05	0.000129026	0.0944319	0.000121546	0.154404	0.137074	0.070627	0.0841275	0.042672	0.0753737	0.0338325	0.0774681	0.024098	0.0548253	0.0244856	0.0534367	0.021235	0.0871126	0.0747854	0.11159	0.000105199	0.0495767	0.00010788
ARL13B	6.10427	9.04441	13.761	9.36437	8.91316	11.0811	11.0247	9.48787	9.44263	6.69476	12.5962	4.533	8.05429	0.798343	9.35677	12.8643	19.6113	10.5474	9.39167	6.86028	11.7745	15.6659	11.9614	1.94327	12.0715	16.1694	14.6002	13.5102	22.0421	17.1134	15.3447	9.87876	29.1768	14.9239	17.5457	18.9707	11.5174	16.047	18.2843	7.34234	5.94906	14.5577	10.5343
ARL14	9.18271e-05	8.38274e-05	9.35396e-05	8.98604e-05	8.4978e-05	9.58231e-05	9.85261e-05	9.47635e-05	0.0398119	9.019e-05	0.000101141	0.0872795	8.48689e-05	0.000103314	8.72566e-05	8.94826e-05	9.66493e-05	9.72975e-05	9.00623e-05	9.61919e-05	0.0339619	0.000106291	9.55554e-05	0.000121546	9.35412e-05	0.000107019	0.123523	9.76526e-05	9.712e-05	0.00010431	0.059134	9.70507e-05	0.024098	0.000103092	0.25219	9.72288e-05	0.021235	9.95428e-05	0.000102874	9.46079e-05	0.000105181	0.000110453	0.0220239
ARL14EP	33.9415	39.8497	28.5601	33.7531	35.0644	36.3208	28.6994	36.4567	26.9984	26.7276	35.9107	25.972	28.3566	27.6058	31.8564	27.0375	32.6751	32.4269	29.2982	32.8526	32.481	29.6861	32.2065	26.6871	33.8867	32.4613	28.5642	38.0154	31.3068	31.6885	28.7089	30.628	38.337	32.6442	24.5922	32.7269	28.3737	24.1897	32.3003	35.2645	28.4564	24.3622	31.6688
ARL15	49.8627	34.8203	60.6798	32.7798	30.6187	55.1538	39.6198	34.7304	34.4266	39.5417	31.4576	33.1081	31.6972	40.5119	27.0098	45.0292	43.6397	45.3804	42.9557	42.8041	66.4692	53.9283	39.9421	28.4332	45.892	32.4809	60.8486	47.1243	52.0692	51.4844	40.5753	40.4652	68.625	37.6649	22.1606	68.7816	46.3874	48.6694	48.8985	32.0096	20.1017	31.5101	32.6331
ARL16	19.1165	12.9171	12.506	15.1365	12.8796	15.8183	11.9236	17.39	13.3667	15.0141	13.2747	10.8627	11.7599	19.9726	14.4835	9.9898	11.0243	13.9432	13.2163	18.8297	13.327	14.5906	15.7332	21.4123	10.9897	14.3939	13.8265	9.29066	6.48783	10.8557	10.2038	10.934	11.1275	12.774	8.23868	13.6719	11.4292	10.7558	9.7391	18.6919	24.1801	13.902	11.3259
ARL17A	5.93792	11.0037	9.92616	19.8509	21.4276	9.52991	11.3967	7.38005	12.2545	25.0936	12.2867	19.5074	18.9292	4.90127	7.39956	13.6833	4.287	14.1113	19.9427	19.3862	22.4546	10.851	7.77503	5.39539	7.25879	16.806	12.1796	18.009	11.5744	5.75472	11.6619	10.9974	19.1802	16.3063	11.4456	18.6466	27.1576	23.7657	8.29899	7.19878	11.9994	32.1852	15.4243
ARL17B	5.93792	11.0037	9.92616	19.8509	21.4276	9.52991	11.3967	7.38005	12.2545	25.0936	12.2867	19.5074	18.9292	4.90127	7.39956	13.6833	4.287	14.1113	19.9427	19.3862	22.4546	10.851	7.77503	5.39539	7.25879	16.806	12.1796	18.009	11.5744	5.75472	11.6619	10.9974	19.1802	16.3063	11.4456	18.6466	27.1576	23.7657	8.29899	7.19878	11.9994	32.1852	15.4243
ARL2	80.227	47.9276	56.2113	73.6402	47.2407	61.788	61.0021	69.1674	57.4586	81.8205	72.1257	49.3208	51.739	142.053	55.0813	59.5825	58.683	50.7954	68.6235	66.9201	42.4135	70.4512	51.9846	121.041	47.9095	67.8134	54.9021	43.1992	54.8662	47.98	46.6121	56.4307	52.564	63.4193	49.5054	60.9327	56.7429	43.7716	48.2499	67.0313	76.3375	52.646	71.4873
ARL2BP	77.7248	75.2657	58.0042	78.9221	75.3804	69.1207	75.8861	79.7781	61.266	75.27	77.5343	49.7493	71.7685	68.8033	65.345	65.4716	69.509	76.173	67.0775	75.1312	64.6064	72.9334	81.1859	82.2878	63.2828	84.2153	59.2088	75.409	71.7672	90.8503	70.2792	66.4895	80.4763	80.9348	50.0626	73.5509	61.5679	59.6911	80.3211	64.1122	74.7737	75.2629	87.4889
ARL2-SNX15	3.34561	2.87078	2.53349	3.02822	3.37986	2.45694	3.43135	2.47879	2.94579	3.29772	4.32644	2.24781	2.47815	5.84082	1.91547	2.65022	4.63275	2.40057	3.23494	2.71247	3.48984	1.77259	3.13605	3.07374	3.65045	3.22251	2.75205	3.96472	3.47019	3.78056	4.82279	4.82324	5.9721	3.28404	1.86311	3.75543	0.954373	1.57149	2.98463	2.99596	3.68419	1.92225	6.84293
ARL3	44.9029	43.5297	34.1708	51.9494	50.905	39.6755	34.6974	44.3167	38.5975	43.3378	45.4897	38.253	40.0562	52.0992	46.5476	31.899	47.6992	38.8951	38.532	45.2225	33.0399	42.2689	32.7159	52.9417	34.1953	40.9924	33.3954	44.7547	36.8416	38.6886	34.3848	40.0231	35.8899	45.8807	52.6893	32.6023	36.9366	26.3071	28.0434	40.5282	48.9767	34.8985	46.4402
ARL4A	42.8405	30.5433	69.8225	23.2574	26.0322	27.962	30.0842	17.3306	21.9207	17.9238	15.2716	8.42822	32.9082	34.9934	30.51	31.4102	18.9949	26.8692	52.3575	23.6705	34.4352	29.7944	23.8167	14.4782	47.9426	17.7187	35.9301	40.9398	18.7103	20.6489	10.6577	42.165	26.9258	22.2507	6.7541	36.8522	21.4953	7.1973	30.4788	29.5924	16.2286	20.8276	20.6181
ARL4C	7.33744	5.06178	4.70031	6.39016	7.06464	4.35849	4.8369	3.50353	8.96174	8.27252	6.68213	34.2374	6.54785	4.04828	7.30145	9.71308	4.79663	6.1546	4.81607	4.17081	10.3651	6.84025	8.55009	13.0109	6.33679	5.55185	8.75676	7.36879	14.5785	12.1079	21.8638	5.05424	11.4393	4.15591	63.4443	8.44668	7.93746	34.8579	8.04094	7.82095	13.3761	7.94159	6.72675
ARL4D	29.6191	15.7366	6.64799	30.8991	15.3644	18.7666	28.8765	17.9136	22.1257	32.1727	27.7635	15.0862	19.8756	21.4868	17.5522	24.7661	35.7396	33.1666	40.4235	48.7766	8.60297	23.0571	40.3194	45.3649	20.8166	58.3677	13.4887	16.5541	48.2942	25.3283	21.4811	43.4992	22.0474	62.4584	46.8015	15.4292	8.68978	26.4521	14.8619	11.9223	117.071	29.7788	34.1891
ARL5A	15.1316	17.9829	29.7257	25.279	16.0688	29.9841	27.2694	16.7206	27.6511	8.07356	28.3362	16.4697	13.8251	9.62435	21.1836	23.1545	25.8793	31.0492	20.2249	16.9089	26.6743	30.2228	28.4897	13.8459	23.8923	26.5618	29.8201	36.8767	36.1542	38.5431	38.9838	27.1866	42.3915	26.8433	32.9022	38.0159	26.2246	28.361	29.7201	24.1246	23.6016	29.8979	25.9307
ARL5B	22.5603	31.7536	24.9533	18.7408	20.8481	23.7323	19.2721	16.1669	28.9183	26.4012	33.5481	30.8117	23.9026	21.522	20.3625	28.0138	29.6503	22.8279	20.522	19.8955	33.8697	36.329	20.8107	22.2019	24.1497	17.9624	24.209	28.9402	33.0808	40.6832	29.0293	18.9284	28.177	18.2392	25.6087	22.4408	24.42	59.7201	29.593	30.3171	15.872	25.772	19.6588
ARL6	3.71636	4.28318	2.66843	4.18272	3.48318	4.57928	4.52224	4.66796	2.8645	3.02059	3.59114	2.41864	4.14883	3.80002	3.36106	3.84965	6.07402	4.7294	3.90398	3.44915	3.74967	4.63685	6.05259	3.32701	4.16681	3.03463	2.79266	4.45972	2.84872	5.82795	2.98837	4.30327	8.05472	4.94752	4.02339	2.91805	2.94752	5.65777	3.38138	4.34618	3.38549	3.3104	3.8998
ARL6IP1	99.6365	116.626	116.843	91.6027	103.096	83.5325	97.0415	88.0998	85.9247	77.8109	93.1414	88.4657	96.4872	58.1916	96.4776	91.998	71.9438	83.7193	85.3472	80.7312	98.783	74.1046	91.5258	66.8188	96.5328	86.7786	90.7509	115.674	97.6333	98.4198	93.0213	86.9045	101.016	76.5021	104.494	120.53	94.9773	117.813	95.9992	115.619	87.8444	85.8326	88.8475
ARL6IP4	68.5145	47.9818	47.3866	43.9467	36.8695	41.5768	45.3142	63.0593	44.7378	65.82	51.7259	47.9539	52.9427	102.571	48.9359	44.8253	44.0823	48.5872	45.5326	58.6381	46.2429	41.0537	41.9402	97.9204	46.3615	52.3766	44.4299	27.5184	36.186	34.9224	36.4494	40.1947	32.8835	37.6498	47.568	46.0554	48.1135	34.9185	30.4415	60.9741	80.8857	44.6333	43.8214
ARL6IP5	105.369	114.432	134.396	165.119	135.812	128.161	167.4	148.893	138.606	133.775	116.251	112.39	130.571	158.865	122.612	139.531	126.123	172.49	139.707	133.45	161.067	117.642	151.485	150.079	125.084	134.541	91.4757	193.841	134.665	213.577	140.052	144.673	147.866	141.166	104.826	142.706	129.246	136.611	114.582	144.164	140.418	155.596	158.3
ARL6IP6	8.66811	8.5119	9.7239	10.1101	6.18653	9.39472	6.83128	8.33209	9.5292	10.5383	9.57332	7.98104	9.41139	6.23666	10.2705	13.4293	7.1362	6.00609	8.4259	8.98318	7.29098	8.89519	7.90839	7.92061	9.93777	8.23838	9.12832	9.16626	8.30448	8.94877	9.23801	9.04595	8.23615	8.66262	12.5815	9.9967	8.89105	6.83065	9.2506	7.0709	8.47836	9.60503	9.46367
[truncated: 19,869 more rows]

## Sheet: TScore_Mm_MyoPR-Provera_Ty
Specimen ID	T-score
NOVA0400.PMeno1_20220823_142722.L001	-3.80005
NOVA0400.PMeno2_20220823_142722.L001	-4.03471
NOVA0400.PMeno3_20220823_142722.L001	-2.40812
[truncated: 40 more rows]

## Sheet: Sample Key
Specimen ID	Group
[truncated: 43 more rows]
